# Supplementary material for: Natural variation in the consequences of gene overexpression and its implications for evolutionary trajectories
Source: eLife. 2021 Aug 2;10:e70564. doi: 10.7554/eLife.70564 (PMC8352584; doi:10.7554/eLife.70564)
Supplement: Supplementary file 1. [file elife-70564-supp1.xlsx]

## Sheet: Sheet1
Strain	Location of isolate	Strain source	Lineage (Sardi et al., 2018)	References
BY4743	Lab Strain	Lab Strain	Laboratory	ATCC
BC187	Napa Valley, USA	Barrel Fermentaion	European/Wine	4
DBVPG1373	Netherlands	Soil	European/Wine	1
NCYC3290	West Africa	Bili wine	West African
Y12	Ivory Coast	Palm wine	Asian/Sake	5
Y2209	San Jacinto, California, USA	Lepidopterous	Mosaic	5
Y389	N/A	Mushrooms	Mosaic	5
Y7568	Philippines	Papaya	Mosaic	5
YJM1273	Pennsylvania, USA	Oak Tree	North American	3
YJM1389	Thailand	Industrial	Asian/Sake	6
YJM1592	Thailand	Industrial	Asian/Sake	6
YJM978	Italy	Human, clinical	European/Wine	2
YPS128	Pennsylvania, USA	Oak tree Soil	North American	3
YPS163	Pennsylvania, USA	Oak tree Soil	North American	3
YPS606	Pennsylvania, USA	Oak tree bark	North American	3
References
1. Capriotti, 1955
2. McCullough et al., 1998
3. Sniegowski et al., 2002
4. Gerke et al., 2006
5. C. Kurtzman (1986) and the ARS culture collection
6. Strope et al., 2015
