# Supplementary material for: Natural variation in the consequences of gene overexpression and its implications for evolutionary trajectories
Source: eLife. 2021 Aug 2;10:e70564. doi: 10.7554/eLife.70564 (PMC8352584; doi:10.7554/eLife.70564)
Supplement: Supplementary file 2. — Genes annotated as involved in translation that were removed from analysis, where indicated in the text. [file elife-70564-supp2.xlsx]

## Sheet: Sheet1
Translation Factor Categories		List of Translation Factors within Commonly Deleterious Genes
Cluster_rRNA_processing_GO		YAL003W
Cluster_ribosome_biogenesis_GO		YAL005C
Cluster_ribonucleoprotein_complex_GO		YBR189W
Cluster_maturation_of_5.8S_rRNA_from_tricistronic_rRNA_transcript_(SSU-rRNA,_5.8S_rRNA,_LSU-rRNA)"_GO		YDL014W
Cluster_translational_termination_GO		YDL084W
Cluster_small_nucleolar_ribonucleoprotein_complex_GO		YDL229W
Cluster_rRNA_modification_GO		YDR060W
Cluster_regulation_of_translational_fidelity_GO		YDR418W
Cluster_preribosome,_large_subunit_precursor"_GO		YDR432W
Cluster_90S_preribosome_GO		YEL034W
Cluster_rRNA_binding_GO		YER110C
Cluster_regulation_of_translation_GO		YER126C
Cluster_ribosomal_protein_import_into_nucleus_GO		YER133W
Cluster_ribosomal_small_subunit_biogenesis_GO		YGL030W
Cluster_ribosome_GO		YGL147C
Cluster_maturation_of_SSU-rRNA_from_tricistronic_rRNA_transcript_(SSU-rRNA,_5.8S_rRNA,_LSU-rRNA)"_GO		YHR141C
Cluster_translational_elongation_GO		YJR123W
Cluster_maturation_of_LSU-rRNA_from_tricistronic_rRNA_transcript_(SSU-rRNA,_5.8S_rRNA,_LSU-rRNA)"_GO		YLL045C
Cluster_translational_initiation_GO		YLR075W
Cluster_negative_regulation_of_translation_GO		YLR150W
Cluster_ribosomal_large_subunit_export_from_nucleus_GO		YLR167W
Cluster_small_nuclear_ribonucleoprotein_complex_GO		YLR175W
Cluster_ribosome_binding_GO		YLR185W
Cluster_eukaryotic_translation_initiation_factor_2B_complex_GO		YLR197W
Cluster_cytosolic_large_ribosomal_subunit_GO		YLR249W
Cluster_large_ribosomal_subunit_GO		YLR293C
Cluster_eukaryotic_translation_initiation_factor_3_complex_GO		YML063W
Cluster_ribosome_export_from_nucleus_GO		YNL162W
Cluster_translation_GO		YOR063W
Cluster_rRNA_metabolic_process_GO		YOR361C
Cluster_translation_initiation_factor_activity_GO		YOR369C
Cluster_small_ribosomal_subunit_GO		YPL106C
Cluster_preribosome,_small_subunit_precursor"_GO		YPL145C
Cluster_ribosomal_large_subunit_assembly_and_maintenance_GO		YPR104C
Cluster_cytosolic_small_ribosomal_subunit_GO		YBR010W
Cluster_ribosomal_large_subunit_biogenesis_GO		YDR025W
Cluster_translation_elongation_factor_activity_GO		YER074W
Cluster_regulation_of_translational_initiation_GO		YGL008C
Cluster_ribosomal_small_subunit_assembly_and_maintenance_GO		YGL071W
Cluster_structural_constituent_of_ribosome_GO		YGL123W
Cluster_RPs_APGcategory		YGL173C
Cluster_rRNAprocessing_APGcategory		YHR010W
Cluster_PAC_APGcategory		YHR203C
		YIL148W
		YJL148W
		YKR094C
		YLR223C
		YLR347C
		YMR242C
		YNL064C
		YOL040C
		YOR096W
		YOR204W
		YPL143W
		YPR010C
		YPR043W
		YAL038W
		YBL051C
		YBL092W
		YBR127C
		YDL130W
		YDR233C
		YDR524C
		YER125W
		YFR031C-A
		YGR192C
		YJR007W
		YKL068W
		YKL081W
		YLL024C
		YLR002C
		YLR074C
		YLR340W
		YLR448W
		YML026C
		YML073C
		YMR143W
		YMR307W
		YMR309C
		YOL086C
		YOR217W
		YPL037C
		YPL043W
		YBR048W
		YBR196C
		YCR031C
		YDL082W
		YDL134C
		YDL188C
		YDR382W
		YER025W
		YER114C
		YER165W
		YGL014W
		YGL076C
		YHR007C
		YHR038W
		YHR170W
		YJL124C
		YJL190C
		YKL060C
		YKL082C
		YKL180W
		YMR116C
		YMR225C
		YOL039W
		YOR233W
		YPR016C
		YBL032W
		YBL072C
		YBL079W
		YBR143C
		YER093C
		YER117W
		YER131W
		YGL120C
		YGR118W
		YKL006W
		YML123C
		YMR128W
		YMR229C
		YNL067W
		YNL132W
		YNL255C
		YOL124C
		YOR341W
		YPL160W
		YBR025C
		YBR069C
		YBR118W
		YBR283C
		YDL031W
		YDL051W
		YDL060W
		YDL185W
		YDR283C
		YER172C
		YGL031C
		YGR103W
		YGR178C
		YGR229C
		YHL033C
		YHR117W
		YJL080C
		YJL109C
		YJR094W-A
		YKL056C
		YKR092C
		YLR029C
		YLR336C
		YML024W
		YML056C
		YMR235C
		YMR290C
		YNL175C
		YNL216W
		YNR053C
		YOL006C
		YOL120C
		YOL127W
		YOR293W
		YPL016W
		YPR132W
