# Supplementary material for: Natural variation in the consequences of gene overexpression and its implications for evolutionary trajectories
Source: eLife. 2021 Aug 2;10:e70564. doi: 10.7554/eLife.70564 (PMC8352584; doi:10.7554/eLife.70564)
Supplement: Supplementary file 3. [file elife-70564-supp3.xlsx]

## Sheet: Sheet1
Primer	Sequence (5' - 3')
TUB1 Forward	GTG ATG GGT TAC AAG GGT TC
TUB1 Reverse	ACC GTA TTC AGC GGA TAG T
KANMX Forward	TGG TTG ATG CGA GTG ATT T
KANMX Reverse	GAC TGA ATC CGG TGA GAA TG
