# Supplementary material for: Natural variation in the consequences of gene overexpression and its implications for evolutionary trajectories
Source: eLife. 2021 Aug 2;10:e70564. doi: 10.7554/eLife.70564 (PMC8352584; doi:10.7554/eLife.70564)
Supplement: Supplementary file 4. — Tab 1: Unnormalized read counts for each strain. Tab 2: Library-size normalized and scaled read counts for each strain, see Materials and methods. Tab 3: Average (log2) change in fitness and Benjamini and Hochberg-corrected FDR as outputted by edgeR, without data imputation. Tab 4: Average (log2) change in fitness and Benjamini and Hochberg-corrected FDR as outputted by edgeR, using data in which some ratios had been imputed, see Methods for details. Tab 5: List of commonly deleterious genes. Tab 6: Strain-specific deleterious genes for each strain. Tab 7: Strain-specific beneficial genes for each strain. [file elife-70564-supp4.xlsx]

## Sheet: Unnormalized Read Counts
gene	BC187_YPD_Rep1_Gen0	BC187_YPD_Rep1_Gen10	BC187_YPD_Rep2_Gen0	BC187_YPD_Rep2_Gen10	BC187_YPD_Rep3_Gen0	BC187_YPD_Rep3_Gen10	BY4743_YPD_Rep1_Gen0	BY4743_YPD_Rep1_Gen10	BY4743_YPD_Rep2_Gen0	BY4743_YPD_Rep2_Gen10	BY4743_YPD_Rep3_Gen0	BY4743_YPD_Rep3_Gen10	DBVPG1373_YPD_Rep1_Gen0	DBVPG1373_YPD_Rep1_Gen10	DBVPG1373_YPD_Rep2_Gen0	DBVPG1373_YPD_Rep2_Gen10	DBVPG1373_YPD_Rep3_Gen0	DBVPG1373_YPD_Rep3_Gen10	NCYC3290_YPD_Rep1_Gen0	NCYC3290_YPD_Rep1_Gen10	NCYC3290_YPD_Rep2_Gen0	NCYC3290_YPD_Rep2_Gen10	NCYC3290_YPD_Rep3_Gen0	NCYC3290_YPD_Rep3_Gen10	Y12_YPD_Rep1_Gen0	Y12_YPD_Rep1_Gen10	Y12_YPD_Rep2_Gen0	Y12_YPD_Rep2_Gen10	Y12_YPD_Rep3_Gen0	Y12_YPD_Rep3_Gen10	Y2209_YPD_Rep1_Gen0	Y2209_YPD_Rep1_Gen10	Y2209_YPD_Rep2_Gen0	Y2209_YPD_Rep2_Gen10	Y2209_YPD_Rep3_Gen0	Y2209_YPD_Rep3_Gen10	Y389_YPD_Rep1_Gen0	Y389_YPD_Rep1_Gen10	Y389_YPD_Rep2_Gen0	Y389_YPD_Rep2_Gen10	Y389_YPD_Rep3_Gen0	Y389_YPD_Rep3_Gen10	Y7568_YPD_Rep1_Gen0	Y7568_YPD_Rep1_Gen10	Y7568_YPD_Rep2_Gen0	Y7568_YPD_Rep2_Gen10	Y7568_YPD_Rep3_Gen0	Y7568_YPD_Rep3_Gen10	YJM1273_YPD_Rep1_Gen0
YDR225W	431	335	307	522	136	343	203	358	174	394	248	508	448	2361	737	1020	543	1382	248	1564	82	1518	46	1392	107	1434	61	1872	66	1403	83	911	70	483	54	1051	346	580	284	577	298	927	590	243	336	359	361	512	272
YIL077C	259	220	160	347	66	215	161	319	139	359	183	510	191	1010	299	517	176	675	69	394	44	399	29	353	26	521	25	472	26	413	35	495	36	304	30	595	113	151	95	150	100	300	249	161	176	188	212	263	115
YML058W	3	3	0	5	2	4	4	7	5	7	6	9	6	12	6	4	3	14	1	12	2	8	1	6	0	8	2	13	0	7	1	8	1	7	0	7	1	3	2	4	1	6	7	7	5	8	2	5	4
YMR115W	2	2	0	1	0	2	1	2	1	0	1	4	1	9	0	1	2	0	2	12	1	9	0	15	0	2	0	6	0	6	0	1	0	2	0	3	0	2	0	1	2	3	3	1	0	1	1	1	2
YNR059W	54	60	37	77	26	54	167	277	146	300	156	376	7	3	14	3	15	1	137	688	55	640	37	629	22	310	12	313	12	294	15	205	14	87	6	188	33	106	40	107	42	193	84	30	43	48	43	50	43
YDL161W	2	2	2	6	2	3	4	2	3	3	1	3	0	0	1	0	1	0	1	5	0	10	2	6	0	5	1	4	0	3	1	8	0	3	0	12	1	5	4	4	4	2	7	2	7	4	6	6	1
YGR138C	150	101	86	160	62	96	119	214	111	224	122	313	46	242	50	69	48	64	124	1053	39	660	21	553	33	96	12	170	17	120	30	302	30	162	17	337	107	98	68	117	87	176	245	74	116	145	153	144	104
YDR379W	14	5	12	8	10	6	110	211	131	243	135	281	3	0	3	0	4	0	35	232	37	248	20	217	3	10	3	29	2	12	0	16	2	7	0	9	10	0	6	0	11	0	19	7	10	6	10	6	7
YLR262C	499	496	311	772	148	413	286	613	283	642	287	847	195	563	280	273	192	361	165	881	117	730	67	655	75	670	46	924	50	805	114	1737	73	791	63	1476	285	400	237	417	244	810	695	339	402	564	465	662	274
YNR073C	192	165	93	230	57	147	95	118	80	176	118	261	15	0	38	0	15	1	124	1248	24	1002	17	1296	34	1321	10	1512	18	1051	28	260	19	128	15	335	137	75	61	151	48	256	165	73	86	49	104	125	22
YOL018C	41	11	37	18	12	7	23	16	25	30	27	22	7	1	14	1	6	2	8	5	10	0	5	12	9	50	4	176	6	90	10	34	6	30	8	23	44	26	25	32	30	54	47	6	31	11	41	18	27
YFR049W	330	325	222	489	137	257	244	543	215	545	260	772	69	96	100	35	80	48	205	1625	124	1380	51	1550	53	421	30	507	26	322	43	562	37	279	34	611	192	242	127	273	140	421	456	255	240	332	292	434	130
YMR257C	135	93	89	102	51	83	144	253	130	289	153	354	108	835	238	240	89	301	178	905	51	801	32	583	17	303	16	316	18	203	25	243	11	142	10	264	99	129	90	139	81	238	188	43	106	64	105	93	65
YNL108C	64	61	51	94	37	74	90	137	83	151	85	184	8	0	16	0	14	0	53	151	42	161	18	130	18	117	7	139	9	117	18	277	19	143	13	258	42	45	39	45	40	66	119	57	66	100	79	105	38
YPL109C	42	27	24	62	15	20	97	165	98	155	86	192	143	902	162	550	138	623	76	750	27	816	24	576	8	39	1	10	6	22	11	120	5	50	3	98	30	39	27	47	18	67	40	13	28	25	29	24	15
YDR410C	221	129	133	198	56	143	147	248	125	248	141	323	129	417	194	275	121	334	111	746	49	643	32	564	39	349	22	398	30	291	36	707	39	383	23	707	136	182	116	199	109	368	257	152	161	215	193	277	113
YIL015W	0	0	0	0	0	0	0	0	0	0	0	0	0	0	0	0	0	0	0	0	0	0	0	0	0	0	0	0	0	0	0	0	0	0	0	0	0	0	0	0	0	0	0	0	0	0	0	0	0
YJL125C	228	200	150	296	85	194	174	341	163	312	172	472	123	411	202	177	108	193	193	1083	71	890	39	813	27	262	20	356	29	229	42	461	28	312	25	499	126	150	138	152	114	285	370	152	180	221	258	295	136
YMR297W	72	64	54	99	34	67	23	99	31	92	47	131	12	0	13	0	18	0	13	148	16	148	10	173	19	177	7	186	10	206	16	233	13	146	9	176	50	83	50	82	50	151	129	50	75	89	83	91	18
YOL086C	230	120	164	148	79	95	149	177	150	168	146	212	50	33	98	18	61	10	41	67	67	49	41	70	36	88	32	102	26	79	37	364	24	161	21	373	128	51	125	81	108	109	374	99	227	151	242	188	90
YPL243W	311	270	159	400	91	259	184	365	169	359	189	492	67	106	103	31	55	48	198	657	70	563	57	569	49	297	29	335	30	439	70	772	42	425	42	810	183	227	112	218	113	316	392	177	260	310	295	374	194
YIL005W	378	318	256	494	153	290	370	651	348	606	395	789	131	243	255	88	142	107	275	784	142	667	81	684	81	609	47	574	52	487	71	808	60	397	46	787	282	316	219	399	241	629	595	249	363	334	427	348	227
YKL021C	200	182	153	306	81	171	123	237	109	264	155	327	77	441	129	249	108	286	57	281	41	286	30	288	26	216	10	332	14	203	23	375	14	249	17	431	108	125	94	134	64	268	208	110	118	175	145	200	146
YMR290C	333	217	196	361	104	214	256	424	217	398	261	531	134	458	255	197	151	265	119	338	83	288	52	294	44	282	42	215	39	183	46	590	34	330	33	559	143	169	149	182	134	276	497	159	254	259	315	330	92
YOR133W	19	1	16	4	9	4	11	5	8	2	23	8	4	0	2	0	4	0	0	0	3	0	2	0	1	0	3	0	6	0	1	1	2	0	2	0	14	0	6	0	5	0	27	2	23	1	17	2	5
YPL029W	47	31	34	58	8	37	66	99	60	83	56	146	11	0	16	0	13	0	31	123	20	120	12	50	13	44	8	104	11	86	16	129	8	73	3	111	47	40	40	65	31	114	94	44	62	57	78	68	44
YBR288C	0	0	0	0	1	0	0	0	0	0	0	1	0	0	0	0	1	0	0	0	0	0	0	0	0	0	1	0	0	0	3	35	2	21	1	34	0	0	0	0	0	0	2	1	3	9	2	6	1
YDL089W	256	169	144	288	84	167	129	311	115	282	131	403	66	147	79	103	51	135	121	656	47	537	32	334	34	348	15	335	23	330	38	346	27	185	16	373	96	91	77	113	77	161	269	112	167	177	186	215	168
YDR284C	206	207	116	297	66	179	132	234	113	229	135	337	78	240	149	83	94	69	70	244	40	149	22	133	38	111	16	114	21	127	20	266	23	176	24	235	98	158	84	172	79	263	201	104	151	171	164	188	125
YDR348C	146	61	80	103	57	48	114	206	129	199	134	286	32	187	60	56	39	81	164	1187	61	853	33	923	48	712	31	911	32	751	22	388	9	114	6	259	87	62	58	75	90	95	124	42	52	68	92	94	179
YER008C	146	16	87	33	42	11	110	85	96	93	126	116	33	0	47	0	35	0	76	86	36	44	26	76	27	14	16	5	22	7	29	84	21	44	12	85	108	38	105	26	102	63	294	41	164	52	187	72	49
YER031C	0	0	0	0	0	0	0	0	0	0	0	0	0	0	0	0	0	0	0	0	0	0	0	0	0	0	0	0	0	0	0	0	0	0	0	0	0	0	0	0	0	0	0	0	0	0	0	0	0
YER122C	316	219	215	322	81	229	217	429	188	367	222	503	349	1762	531	934	393	1001	201	693	92	517	32	492	50	235	35	305	25	217	59	641	44	388	27	644	199	222	165	243	132	373	411	178	264	293	305	307	163
YGL015C	196	162	127	218	76	142	146	271	135	288	161	391	135	585	174	289	164	299	138	687	71	486	36	535	25	269	17	318	21	218	26	314	14	161	18	333	117	208	92	190	91	333	233	79	144	151	178	149	165
YGL226W	130	127	88	154	54	115	121	226	105	263	138	300	170	356	230	196	167	250	128	194	55	168	18	161	21	186	12	197	14	165	17	338	23	181	19	371	99	99	81	95	78	132	219	92	130	144	160	166	49
YGR233C	334	254	216	363	101	205	247	403	231	472	236	570	225	1609	314	674	226	909	279	3368	106	2574	65	2481	62	828	35	955	34	723	76	637	43	344	27	691	213	236	157	279	162	347	480	171	287	294	341	340	258
YHL013C	370	338	234	533	114	351	199	561	231	580	254	719	141	706	266	420	173	447	261	1115	70	795	54	790	45	418	24	534	38	426	45	629	37	372	29	562	193	283	171	300	155	474	408	174	227	275	272	307	155
YJR006W	0	0	0	0	0	0	0	0	0	0	0	0	0	0	0	0	0	0	0	0	0	0	0	0	0	0	0	0	0	0	0	0	0	0	0	0	0	0	0	0	0	0	0	0	0	0	0	0	0
YKL088W	139	126	81	185	47	120	67	104	47	70	60	99	80	318	118	210	85	213	32	253	28	198	15	201	18	97	18	137	14	118	24	274	17	141	18	284	82	90	67	102	63	161	234	110	133	156	139	177	55
YNL023C	0	0	0	0	0	0	0	0	0	0	0	0	0	0	0	0	0	0	0	0	0	0	0	0	0	0	0	0	0	0	0	0	0	0	0	0	0	0	0	0	0	0	0	0	0	0	0	0	0
YNL135C	242	318	171	433	85	290	159	210	144	240	143	348	178	1450	308	840	218	1001	85	502	54	395	28	396	34	191	24	212	16	223	34	546	33	321	20	606	158	190	153	241	137	327	338	199	191	321	239	324	92
YNL265C	152	193	71	304	59	176	77	122	64	134	84	163	57	159	96	89	61	147	32	343	37	381	10	291	13	252	11	145	15	149	26	303	18	193	10	300	63	101	45	119	48	171	169	76	99	127	107	149	87
YAL012W	148	143	104	208	57	108	74	129	45	155	107	185	173	512	280	257	201	295	130	108	25	97	22	66	16	159	15	90	12	124	27	269	27	160	15	328	106	99	72	122	92	183	269	99	134	184	181	185	126
YBR213W	383	347	231	549	122	338	312	626	255	581	269	860	124	393	244	211	148	279	165	1203	117	688	44	872	44	767	29	872	35	432	39	895	53	455	30	927	168	205	182	222	156	348	536	246	281	376	350	490	328
YDL017W	325	278	178	472	111	257	163	318	142	279	158	490	421	1857	627	823	412	1077	119	341	58	300	29	339	54	540	34	600	27	477	45	549	45	330	24	611	181	301	179	253	160	453	476	199	296	307	350	416	232
YDL211C	324	328	210	451	112	267	236	474	205	517	221	594	212	1475	359	700	237	765	236	1036	114	1066	56	781	57	631	32	819	46	559	71	683	58	428	32	683	193	211	139	225	120	459	452	202	253	350	285	395	115
YDR182W	283	202	178	310	84	177	207	438	182	429	253	625	79	432	137	164	75	183	160	669	80	716	44	425	54	630	34	532	50	407	52	599	30	330	28	606	215	428	175	518	175	881	391	191	211	293	255	329	117
YDR211W	0	0	0	0	0	0	0	0	0	0	0	0	0	0	0	0	0	0	0	0	0	0	0	0	0	0	0	0	0	0	0	0	0	0	0	0	0	0	0	0	0	0	0	0	0	0	0	0	0
YDR246W	241	174	148	289	60	198	122	285	85	251	120	351	100	577	157	288	136	326	63	453	36	386	30	337	46	556	23	671	35	462	57	826	46	471	25	835	160	296	145	278	119	523	544	334	306	512	400	584	166
YDR328C	286	253	176	383	92	251	225	489	212	483	286	690	666	6188	1017	3021	733	3821	238	3197	99	2896	67	2438	63	911	26	1224	40	905	45	803	48	439	28	829	162	197	158	218	137	401	479	257	270	377	300	426	326
YDR504C	193	250	145	343	75	208	126	308	127	277	123	376	180	1334	311	836	211	921	86	1121	57	1150	38	1036	50	814	23	1004	23	852	36	491	26	282	25	470	108	228	109	235	100	407	212	151	138	208	188	274	318
YDR524C	305	134	188	211	92	133	200	114	184	128	205	172	39	0	45	0	29	0	167	72	57	48	29	21	22	249	22	268	26	182	55	305	43	157	21	288	132	68	90	72	121	112	288	83	155	114	196	146	51
YGR135W	62	70	41	88	22	67	60	69	51	97	61	108	12	0	8	0	10	0	19	38	26	31	13	57	14	94	12	161	10	97	7	142	14	66	2	112	20	6	21	12	26	25	85	46	72	46	57	81	61
YGR161C	158	148	116	215	41	149	91	139	71	144	83	197	114	952	162	420	109	489	35	239	33	141	17	172	34	212	22	196	20	167	23	506	25	260	12	559	117	127	92	150	94	221	403	190	241	312	244	355	84
YGR213C	187	146	113	240	53	142	84	192	80	199	109	251	131	457	162	329	112	225	70	145	46	204	17	212	31	180	14	78	27	141	40	509	24	271	15	465	91	205	76	166	105	283	280	147	167	205	224	243	144
YHL039W	114	109	87	197	41	126	66	118	48	113	67	178	5	0	15	0	12	0	73	327	25	267	22	295	17	32	4	34	5	32	20	225	15	144	10	249	30	66	32	60	33	130	172	68	75	99	110	112	44
YIL117C	1	0	2	0	1	0	86	163	90	133	103	199	3	0	2	0	0	0	100	183	19	186	26	144	3	1	1	7	0	0	0	0	0	0	0	0	1	0	0	0	1	0	2	0	1	0	2	0	0
YJL078C	161	129	97	180	65	139	61	82	56	112	69	130	32	123	41	59	31	64	30	205	24	90	13	189	21	232	17	238	18	195	15	227	15	130	7	221	81	101	73	109	72	245	208	94	105	111	144	165	65
YLR395C	93	73	37	119	30	69	21	41	16	38	25	76	44	307	80	138	44	143	0	103	4	100	4	71	12	218	4	216	6	153	6	128	7	69	6	233	38	53	40	88	21	124	71	28	48	56	60	73	20
YML034W	97	40	73	68	33	40	103	90	92	86	104	96	14	0	30	0	20	0	129	834	20	405	28	676	26	1498	13	1596	20	1167	23	224	14	109	8	163	56	41	67	52	73	76	235	58	141	90	148	107	29
YMR210W	21	13	5	49	15	17	7	8	6	5	10	12	9	14	4	15	2	2	3	45	2	33	4	42	1	30	0	40	0	46	2	29	2	18	3	143	11	4	4	13	1	21	16	6	8	12	16	20	5
YMR227C	188	122	141	213	66	112	141	192	100	191	130	253	43	6	70	3	45	11	69	106	42	116	34	96	33	187	27	122	20	127	35	531	28	290	27	490	167	240	164	244	137	374	356	134	214	242	224	262	98
YOR126C	188	169	115	267	51	166	159	422	142	354	191	561	380	1913	527	909	409	1120	72	636	51	547	34	481	24	163	21	128	24	131	36	535	29	249	23	506	118	151	114	194	87	318	205	88	121	163	137	177	84
YOR147W	172	122	103	193	52	85	128	235	103	244	128	278	26	0	32	0	16	0	96	796	40	627	33	528	33	530	20	707	35	457	21	366	13	184	19	304	99	139	103	132	59	222	289	119	149	163	200	238	71
YPL005W	4	6	1	2	3	1	1	6	7	5	4	11	0	0	3	0	0	0	0	0	0	0	1	0	0	0	0	0	0	0	0	0	0	0	0	0	0	1	2	2	4	1	7	1	5	11	4	7	32
YPL089C	192	167	119	271	76	145	121	247	125	252	130	328	99	488	169	222	98	293	199	305	33	313	35	233	24	199	19	164	14	134	24	260	30	162	11	308	87	76	77	79	72	120	220	100	151	125	155	177	149
YPR132W	44	9	26	18	18	9	185	274	148	256	201	359	15	16	39	3	24	11	81	126	55	102	34	99	6	3	2	16	11	11	6	78	4	34	6	56	25	9	13	11	23	8	28	12	19	15	28	29	21
YBL075C	104	104	88	154	53	85	32	43	35	35	39	42	120	466	216	194	152	221	0	140	11	22	9	81	38	178	14	360	8	294	22	192	16	111	9	190	74	98	52	95	73	154	115	33	72	67	75	67	27
YBR047W	338	366	216	532	102	296	310	655	286	628	360	843	206	974	327	560	270	688	172	528	113	547	61	374	52	244	25	247	32	185	75	809	57	456	30	815	210	314	182	350	176	468	542	256	332	415	354	510	214
YBR059C	1	0	2	0	1	0	37	28	23	26	53	21	2	0	0	0	0	0	0	11	14	4	3	1	0	0	0	0	0	0	0	0	0	0	0	0	1	0	0	0	0	0	5	0	1	5	5	2	0
YBR131W	340	271	205	399	103	239	154	367	135	314	175	451	257	2802	399	1292	294	1613	194	3870	54	3164	39	3359	76	1830	43	1573	47	1773	63	877	56	540	20	985	179	365	144	411	144	735	466	221	251	338	328	411	194
YBR139W	80	34	47	49	32	32	138	244	131	231	162	317	13	0	18	0	9	0	100	328	46	193	35	326	16	147	14	153	9	146	16	133	8	73	4	130	55	93	55	124	47	206	74	17	48	23	40	52	65
YBR170C	200	154	111	217	71	130	182	319	187	348	222	437	355	2339	565	1074	340	1362	163	589	92	507	33	525	35	179	33	262	26	202	48	433	35	224	21	442	132	179	110	207	106	347	251	122	137	172	182	232	130
YBR196C-B	155	190	125	283	54	176	90	252	80	262	98	311	44	91	61	67	59	88	58	330	41	242	15	345	25	343	20	353	19	168	27	431	22	204	8	394	126	131	82	156	94	280	314	193	165	299	209	326	90
YBR227C	296	213	155	362	84	186	200	469	185	420	234	588	108	315	166	156	124	194	272	910	89	705	45	716	50	328	22	234	30	321	48	556	32	293	22	503	176	300	164	296	129	476	348	178	204	285	243	315	138
YBR238C	0	0	0	0	0	0	0	0	0	0	0	0	0	0	0	0	0	0	0	0	0	0	0	0	0	0	0	0	0	0	0	0	0	0	0	0	0	0	0	0	0	0	0	0	0	0	0	0	0
YBR242W	320	308	161	486	106	319	179	386	165	375	184	512	223	1489	368	638	268	801	175	893	75	645	42	901	43	796	20	1169	33	525	45	583	24	343	26	635	160	296	137	307	141	550	375	223	239	348	266	359	322
YCL034W	141	95	105	155	54	86	71	70	59	82	61	91	36	19	82	30	59	24	68	60	19	37	16	10	19	137	13	190	21	92	36	432	30	208	15	456	93	80	69	121	86	126	241	125	157	214	177	246	72
YDL020C	178	118	96	169	68	107	187	297	161	276	215	391	98	397	162	166	147	228	62	231	70	209	50	239	33	176	17	278	20	148	39	366	22	244	20	544	92	154	115	149	93	224	258	85	125	152	162	191	66
YDL036C	233	247	130	367	79	202	125	321	119	296	151	418	205	1591	305	726	238	756	122	560	40	381	30	638	38	327	15	461	26	334	29	467	26	242	11	572	109	182	103	194	73	344	254	105	122	137	164	215	86
YDL043C	423	409	244	607	128	374	282	568	237	550	305	763	193	1342	376	611	241	838	243	1008	99	800	47	780	67	506	37	441	43	529	68	1011	54	504	39	914	197	246	142	242	153	472	478	250	316	455	337	435	278
YDL103C	0	0	0	0	0	0	0	0	0	0	0	0	0	0	0	0	0	0	0	0	0	0	0	1	0	0	0	0	0	0	0	0	0	0	0	0	0	0	0	0	0	0	0	0	0	0	0	0	0
YDL127W	214	176	100	301	72	202	120	242	100	255	118	336	22	4	41	0	31	2	129	154	42	77	30	102	21	187	17	77	19	102	20	460	27	244	16	436	113	82	55	88	80	145	281	106	140	212	165	202	90
YDL135C	19	5	7	17	9	8	115	235	99	227	103	354	4	0	3	0	7	0	41	67	38	51	23	40	5	33	5	29	0	18	3	32	2	8	1	37	37	37	28	50	31	97	10	7	12	17	9	13	0
YDL146W	42	25	19	73	6	41	126	215	101	193	127	286	8	0	3	0	6	0	118	386	46	287	22	286	4	58	3	56	5	37	5	141	11	81	8	125	39	60	23	75	18	122	32	17	13	26	29	25	30
YDL174C	176	154	95	236	61	139	53	100	44	70	54	109	60	262	125	137	89	193	31	53	25	87	11	48	19	148	13	79	17	134	42	345	20	193	15	339	77	86	63	99	70	129	173	69	100	121	104	143	100
YDL224C	568	521	361	712	186	498	525	898	425	973	525	1398	407	3720	605	1724	446	1950	559	4229	219	3483	128	3633	135	2525	76	2882	81	2196	135	1685	101	822	62	1563	354	410	255	421	336	742	1131	475	642	752	748	825	433
YDR017C	0	0	0	0	0	0	0	0	0	0	0	0	0	0	0	0	0	0	0	0	0	0	0	0	0	0	0	0	0	0	0	0	0	0	0	0	0	0	0	0	0	0	0	0	0	0	0	0	0
YDR066C	264	237	163	359	73	207	155	407	128	397	165	460	286	2104	377	1067	355	1403	153	1354	55	1233	26	1112	41	779	21	1059	22	806	32	852	29	454	25	895	127	207	81	220	121	353	291	172	208	287	200	341	200
YDR077W	292	146	204	229	92	118	222	417	186	381	224	497	261	2050	477	941	271	1139	182	513	60	321	35	391	47	257	37	132	35	155	43	615	29	426	22	720	241	191	188	185	189	432	443	138	246	297	317	275	111
YDR090C	380	342	218	539	116	348	176	273	158	300	192	382	303	1005	517	473	335	551	39	219	76	256	43	173	55	358	26	370	30	345	56	793	48	369	30	782	196	286	178	323	135	542	428	268	261	417	269	487	137
YDR176W	267	224	187	377	99	189	123	113	109	112	145	150	125	236	240	102	131	145	28	103	50	50	30	61	60	197	36	308	53	217	65	920	57	471	36	822	197	172	194	215	177	334	178	61	105	93	101	104	173
YDR221W	147	74	81	121	42	78	102	169	103	157	92	250	78	275	153	121	96	157	108	263	36	222	15	212	32	197	16	82	20	126	37	420	27	218	23	420	113	100	96	86	103	154	106	25	62	76	73	51	53
YDR226W	289	245	163	389	86	221	156	269	130	262	169	373	171	599	233	354	169	422	195	188	30	188	31	223	43	196	17	329	25	145	45	481	35	270	27	601	117	131	112	129	74	227	384	182	209	243	252	284	73
YDR273W	107	120	73	193	40	108	56	99	48	108	52	112	72	297	104	204	61	154	37	181	18	231	20	77	17	237	14	180	8	139	29	321	16	173	11	347	64	71	41	59	59	91	151	75	113	121	97	137	66
YDR275W	152	77	117	121	57	72	37	69	35	73	35	102	208	960	341	462	208	604	43	271	20	330	8	373	14	183	11	202	20	145	30	254	26	123	18	200	121	86	102	74	89	179	147	41	79	55	116	71	82
YDR276C	0	0	0	0	0	0	0	0	0	0	0	0	0	0	0	0	0	0	0	0	0	0	0	0	0	0	0	0	0	0	0	0	0	0	0	0	0	0	0	0	0	0	0	0	0	0	0	0	0
YDR286C	185	162	116	286	61	160	189	394	160	411	182	600	30	0	31	6	39	0	131	686	60	479	31	664	36	607	33	596	25	422	28	437	23	220	14	500	125	269	126	270	119	444	287	132	158	233	174	233	156
YDR287W	212	234	139	387	74	233	143	213	144	282	145	387	247	1197	501	524	312	678	120	342	33	274	40	260	25	389	17	413	20	370	34	371	17	207	15	435	118	130	82	136	94	227	275	142	156	238	193	240	144
YDR336W	216	208	115	335	83	159	10	23	18	36	11	39	896	3156	1328	1491	671	1413	38	132	4	99	4	116	56	1145	22	1288	28	1163	33	742	39	346	29	899	172	271	136	405	108	688	250	91	141	145	174	199	121
YDR357C	89	44	60	79	22	51	102	175	97	169	108	249	45	272	69	132	43	114	108	292	33	230	19	299	17	294	12	461	16	285	21	234	14	127	12	235	57	83	47	67	63	110	142	87	70	140	94	133	55
YDR488C	90	85	52	127	34	73	91	158	79	149	90	186	13	0	22	0	14	0	160	124	38	90	23	123	20	63	7	134	8	73	19	151	10	69	8	164	50	72	53	96	49	158	119	44	62	70	97	72	97
YER039C	0	0	0	0	0	0	0	0	0	0	0	0	0	0	0	0	0	0	0	0	0	0	0	0	0	0	0	0	0	0	0	0	0	0	0	0	2	0	0	0	0	0	0	0	0	0	0	0	0
YER072W	0	0	0	0	0	0	0	0	0	0	0	0	0	0	0	0	0	0	0	0	0	0	0	0	0	0	0	0	0	0	0	0	0	0	0	0	0	0	0	0	0	0	0	0	0	0	0	0	0
YER109C_1	2	1	1	0	1	2	3	2	1	2	1	0	1	2	0	6	0	4	0	6	3	1	2	0	1	2	0	1	1	1	0	1	0	2	0	2	2	4	2	1	1	2	4	2	3	7	0	3	3
YFL004W	181	100	126	196	71	100	103	180	116	169	129	237	23	0	51	0	33	0	83	77	44	68	37	88	49	103	28	128	25	95	46	415	34	181	24	405	124	113	114	106	98	204	394	98	234	204	247	220	98
YFL012W	149	107	95	190	54	86	68	91	48	117	72	139	465	1156	647	499	528	702	39	8	25	6	9	18	44	502	26	551	24	474	17	290	15	122	9	243	61	118	78	112	63	200	184	64	115	124	139	145	177
YFL044C	18	18	18	22	5	22	4	7	3	4	5	12	0	0	2	0	0	0	0	0	0	0	1	0	1	40	3	28	1	57	2	34	3	11	3	16	17	41	6	39	19	76	51	36	17	54	34	44	5
YGL047W	364	311	202	434	114	298	254	535	190	572	291	820	113	470	134	185	128	171	188	738	110	572	77	377	65	557	38	688	43	473	82	992	53	543	41	1045	180	221	167	248	144	321	505	279	325	422	348	453	177
YGL087C	182	152	135	257	65	127	184	318	147	338	186	453	134	889	189	422	152	484	148	714	82	484	36	480	43	386	28	313	24	316	39	507	34	273	17	554	109	161	102	152	80	268	279	129	149	202	212	256	125
YGL123W	137	88	88	121	51	73	82	78	89	92	107	145	127	248	219	84	111	127	25	8	10	21	10	55	15	78	11	114	16	50	16	140	19	70	14	229	94	49	81	79	66	138	262	71	108	82	160	117	29
YGL126W	105	124	74	219	45	127	128	208	135	191	132	257	10	0	25	0	15	0	81	236	45	173	19	210	12	36	15	39	9	34	25	329	23	202	19	372	55	61	45	51	57	94	109	39	65	96	90	80	70
YGL141W	232	81	131	138	76	98	176	250	162	291	172	309	495	2553	775	1114	620	1211	126	268	46	228	27	136	35	137	26	225	28	143	49	351	35	202	19	365	104	143	115	111	115	186	290	95	174	138	222	164	103
YGL162W	126	99	77	159	57	99	88	212	110	212	101	274	57	129	82	50	63	41	27	126	34	111	26	174	21	91	16	126	7	61	17	197	16	104	10	161	95	144	66	178	61	254	169	74	92	92	114	144	51
YGL171W	163	117	116	182	53	109	132	223	107	261	126	292	120	679	179	345	138	392	95	379	43	320	32	329	43	523	24	461	20	393	28	295	23	144	16	302	96	115	83	157	78	200	217	84	144	127	150	171	75
YGL180W	34	0	20	0	9	0	111	184	89	187	111	219	7	0	11	0	6	0	71	438	40	267	27	232	7	64	1	14	13	18	8	60	6	37	4	95	21	10	18	11	22	18	44	12	27	15	35	21	60
YGL220W	0	0	0	0	0	0	0	0	0	0	0	0	0	0	0	0	0	0	0	0	0	0	0	0	0	0	0	0	0	0	0	0	0	0	0	0	0	0	0	0	0	0	0	0	0	0	0	0	0
YGL227W	39	34	25	38	8	23	55	87	52	100	63	118	43	172	47	76	29	61	2	57	19	19	9	115	5	29	4	16	5	9	11	58	4	33	3	44	17	7	15	9	16	15	52	15	28	25	43	21	27
YGR196C	115	56	64	86	42	45	58	126	55	131	60	158	30	230	67	50	48	65	83	94	16	108	11	85	20	114	16	108	9	127	20	198	16	140	16	274	72	42	49	44	52	101	158	58	86	62	102	99	86
YGR240C	129	65	64	90	48	66	91	107	78	108	92	128	146	461	236	214	148	274	35	194	25	120	17	199	31	201	21	290	20	330	23	170	13	93	12	136	77	33	46	64	68	96	203	52	85	53	145	85	56
YGR248W	6	0	1	0	1	0	6	7	5	9	4	7	0	0	0	0	1	0	0	0	4	0	0	0	3	27	3	25	2	36	0	0	1	0	0	0	1	0	3	0	2	0	4	0	8	0	4	1	2
YGR255C	223	155	145	265	89	137	188	322	167	374	198	412	205	502	372	281	265	392	177	314	48	238	42	206	47	352	23	384	22	319	50	484	29	252	26	459	141	198	118	193	141	379	404	149	222	208	281	211	57
YHL015W-A	346	307	198	462	115	299	217	458	175	483	233	596	156	743	292	350	209	429	263	1081	103	907	35	867	52	513	39	538	39	464	34	523	19	298	22	537	199	326	149	322	149	560	422	215	231	325	314	374	154
YHR040W	93	75	49	106	30	105	49	63	46	64	52	96	53	173	61	87	65	76	44	137	19	113	3	131	26	114	24	132	18	175	22	304	28	174	17	335	95	70	74	81	62	101	199	97	124	148	135	156	63
YHR046C	194	167	129	279	82	158	134	268	146	256	169	401	93	423	134	219	111	209	268	656	70	547	24	522	30	221	26	295	22	172	47	488	22	228	19	488	142	200	125	195	96	332	309	164	159	256	200	228	87
YHR084W	211	79	137	119	64	84	125	96	102	92	142	107	152	585	258	328	154	367	68	186	31	190	17	243	25	73	12	119	24	103	32	334	42	145	19	215	100	42	77	36	94	77	303	84	181	124	226	156	76
YHR086W	0	0	0	0	0	0	0	0	0	0	0	0	0	0	0	0	0	0	0	0	0	0	0	0	0	0	0	0	0	0	0	0	0	0	0	0	0	0	0	0	0	0	0	0	0	0	0	0	0
YHR146W	0	0	0	0	0	0	0	0	0	0	0	0	0	0	0	0	0	0	0	0	0	0	0	0	0	0	0	0	0	0	0	0	0	0	0	0	0	0	0	0	0	0	0	0	0	0	0	0	0
YIL026C	112	31	67	67	44	33	85	76	67	93	79	120	25	0	36	0	23	0	97	193	24	160	11	130	11	92	12	124	13	117	20	154	16	72	16	141	72	18	51	18	57	56	198	36	113	52	130	77	82
YIL033C	87	62	53	81	25	69	75	95	65	106	90	132	17	0	30	0	19	0	55	99	21	91	25	118	12	19	8	22	15	36	16	171	12	95	9	212	63	51	55	60	59	83	153	52	70	57	84	80	30
YIL071C	20	22	14	37	6	30	24	37	20	42	20	59	2	0	7	0	2	0	8	85	6	51	4	96	0	4	0	0	1	3	6	38	5	14	0	51	9	10	7	7	6	7	20	13	25	24	25	38	2
YIL101C	78	82	56	89	31	76	83	89	65	133	98	180	8	0	23	0	15	0	75	889	18	629	8	961	18	820	8	1069	12	915	10	265	10	114	8	385	87	61	51	70	43	130	102	37	55	47	79	94	24
YIL139C	23	20	11	20	9	20	18	26	15	24	20	37	2	0	8	0	9	1	17	56	4	35	2	26	4	23	0	27	4	28	2	58	6	42	3	47	14	6	10	6	6	16	40	16	13	23	30	38	12
YIR038C	270	234	167	334	84	205	201	416	204	366	199	487	151	860	233	445	178	487	102	698	78	518	48	632	45	356	21	186	21	232	48	679	42	385	27	673	153	243	149	252	130	387	403	176	204	308	264	325	316
YJL006C	406	275	273	453	133	275	392	590	347	624	366	782	290	1186	460	598	373	674	303	964	118	465	93	444	66	303	60	435	53	388	85	996	76	607	38	1028	227	271	210	322	200	514	632	314	365	486	406	570	214
YJL012C	0	0	0	0	0	0	0	0	0	0	0	0	0	0	0	0	0	0	0	0	0	0	0	0	0	0	0	0	0	0	0	0	0	0	0	0	0	0	0	0	0	0	0	0	0	0	0	0	0
YJL026W	41	1	35	1	15	1	143	106	132	107	177	129	31	8	57	0	31	1	100	22	57	10	36	34	13	2	6	0	9	14	12	46	4	17	3	19	47	25	29	38	36	37	85	5	52	15	57	11	30
YJL027C	79	67	64	91	27	61	68	154	75	152	75	248	44	190	78	122	52	145	80	791	44	588	31	637	14	134	14	183	9	102	20	178	8	121	19	207	68	104	55	139	67	183	170	59	95	112	123	106	100
YJL097W	0	0	0	0	0	0	0	0	0	0	0	0	0	0	0	0	0	0	0	0	0	0	0	0	0	0	0	0	0	0	0	0	0	0	0	0	0	0	0	0	0	0	0	0	0	0	0	0	0
YJL153C	27	35	16	59	5	35	10	25	7	24	8	32	4	0	5	0	2	0	11	23	3	21	3	45	6	36	2	12	1	15	1	31	4	13	1	34	17	20	8	25	12	27	31	9	19	15	24	12	6
YJL192C	122	28	63	42	27	22	165	222	142	262	198	343	26	0	40	0	20	0	161	339	63	248	41	268	25	216	17	201	17	187	25	226	17	93	16	229	74	81	86	99	88	175	197	34	106	44	112	63	25
YJR010C-A	122	88	74	121	22	101	119	195	111	185	116	275	14	0	9	0	21	0	159	694	46	613	43	757	18	252	12	258	12	194	20	287	12	140	10	270	43	54	45	55	41	95	194	96	110	129	100	167	25
YJR013W	154	109	80	181	38	108	66	83	53	87	66	96	16	0	23	0	11	0	37	119	18	96	13	63	23	256	15	218	21	131	16	350	23	151	15	295	48	97	55	97	53	125	232	105	117	165	125	169	63
YJR014W	0	0	0	0	0	0	0	0	0	0	0	0	0	0	0	0	0	0	0	0	0	0	0	0	0	0	0	0	0	0	0	0	0	0	0	0	0	0	0	0	0	0	0	0	0	0	0	0	0
YJR024C	78	47	39	74	25	44	65	123	64	110	79	177	135	909	202	576	142	475	40	336	28	190	14	147	19	136	6	171	14	181	15	330	19	157	13	343	67	70	36	70	63	147	152	96	108	117	102	163	35
YJR035W	0	0	0	0	0	0	0	0	0	0	0	0	0	0	0	0	0	0	0	0	0	0	0	0	0	0	0	0	0	0	0	0	0	0	0	0	0	0	0	0	0	0	0	0	0	0	0	0	0
YJR075W	178	129	118	228	78	150	130	217	88	221	131	285	136	433	190	232	129	293	80	647	41	461	26	417	31	152	22	159	24	151	39	435	34	234	21	453	121	109	135	121	104	221	331	135	179	215	206	268	84
YJR125C	65	18	44	34	18	24	165	393	173	305	197	456	335	1032	492	583	352	664	247	642	82	542	44	548	20	94	13	158	14	82	23	387	19	162	9	318	79	143	52	141	69	238	163	75	83	117	101	96	45
YKL041W	243	247	169	430	101	269	228	382	168	387	223	508	122	497	219	344	147	374	155	835	79	860	52	853	28	529	24	482	38	376	48	676	41	394	19	737	130	129	106	143	107	192	327	155	152	221	196	274	123
YKL152C	1495	1117	843	1706	511	1002	858	1405	819	1313	962	1773	727	2037	1169	1007	833	1236	781	2124	317	1948	219	1945	251	2769	148	2710	189	1965	269	3260	246	1790	137	3225	810	974	671	984	721	1595	2212	931	1245	1397	1381	1592	764
YKL210W	0	0	0	0	0	0	0	0	0	0	0	0	0	0	0	0	0	0	0	0	0	0	0	0	0	0	0	0	0	0	0	0	0	0	0	0	0	0	0	0	0	0	0	0	0	0	0	0	0
YKL221W	197	131	125	222	74	143	157	296	116	217	154	375	162	635	198	298	132	360	132	1099	68	862	26	670	39	339	30	328	29	324	38	455	23	249	19	437	105	156	77	136	85	221	300	145	166	224	207	288	148
YKR001C	36	38	36	52	20	34	77	132	54	108	65	146	1	0	7	0	8	0	43	105	24	116	15	99	4	35	3	8	1	16	1	46	3	28	1	57	12	20	14	9	11	10	38	17	19	12	17	33	10
YKR101W	66	23	39	38	22	13	76	130	64	112	66	126	44	282	59	83	43	90	40	68	18	49	12	19	26	742	20	823	20	647	17	195	6	104	9	172	75	113	67	150	57	208	177	52	85	85	104	93	29
YLL029W	155	83	92	160	33	115	95	139	78	145	106	198	38	188	100	89	67	86	44	217	25	144	20	115	12	126	13	71	11	114	21	213	12	151	10	241	77	70	57	73	70	136	187	56	104	100	117	114	106
YLL038C	95	90	64	135	29	108	37	94	40	130	42	134	16	0	30	0	19	0	66	189	13	136	16	176	16	188	7	205	11	235	13	173	11	59	2	148	63	110	53	101	51	204	152	50	101	94	84	114	25
YLR061W	208	145	130	218	76	123	123	132	107	124	103	177	131	282	198	140	114	169	73	164	27	142	23	237	25	87	12	123	22	70	35	394	35	207	28	391	141	101	104	145	82	194	279	82	110	134	168	163	41
YLR073C	148	132	99	185	58	109	65	48	36	50	64	58	320	1141	440	512	341	655	63	65	17	41	8	85	38	403	20	477	25	300	26	378	16	161	19	327	141	206	120	274	101	460	339	110	177	188	236	203	202
YLR092W	0	0	0	0	0	0	0	0	0	0	0	0	0	0	0	0	0	0	0	0	0	0	0	0	0	0	0	0	0	0	0	0	0	0	0	0	0	0	0	0	0	0	0	0	0	0	0	0	0
YLR179C	51	28	26	43	20	23	61	70	62	60	55	109	54	329	93	170	59	216	49	172	16	80	16	169	8	64	5	56	4	72	6	105	8	82	4	135	23	21	27	44	27	60	118	64	83	85	76	94	19
YLR324W	248	289	135	391	82	218	149	300	124	304	146	372	143	793	217	405	137	423	128	580	54	500	32	512	30	325	18	308	24	282	32	363	24	195	13	347	103	100	63	105	83	136	340	163	189	225	229	276	93
YLR364W	213	180	122	275	84	191	74	163	64	167	85	212	174	834	307	467	199	510	64	129	22	120	14	66	49	860	35	990	29	706	34	734	39	390	20	695	135	288	118	293	109	518	408	196	228	276	260	327	102
YLR437C	257	206	179	336	81	232	169	328	132	326	197	419	252	1258	422	765	304	747	90	942	83	819	39	796	48	790	37	769	37	509	52	585	28	295	17	574	167	259	134	259	132	527	375	184	206	315	258	341	142
YLR449W	17	10	9	12	4	7	126	247	108	280	147	311	3	0	8	0	3	0	127	258	45	178	32	251	1	0	2	0	3	0	4	88	7	42	6	72	17	32	15	43	22	56	13	8	5	15	8	14	26
YML054C	34	34	17	45	11	26	78	130	71	137	80	175	68	215	112	116	73	151	45	209	28	134	18	87	2	3	4	10	4	17	8	45	6	28	0	44	15	3	10	13	7	9	26	7	12	5	9	8	6
YML056C	167	104	100	135	62	81	103	167	90	163	126	249	98	232	192	105	104	126	62	38	26	47	15	49	25	333	25	224	22	268	36	364	24	137	10	372	127	191	103	177	87	284	346	118	210	188	247	240	61
YMR005W	46	40	30	59	19	36	124	214	107	228	143	270	5	0	11	0	15	0	110	398	53	468	42	288	11	91	13	77	9	70	11	107	3	46	5	111	40	21	26	25	23	29	58	28	29	24	62	38	14
YMR032W	106	76	61	135	31	100	42	48	30	55	38	91	13	2	12	0	10	0	12	172	20	130	9	57	20	157	14	164	20	157	8	93	9	55	4	87	62	125	76	126	61	235	193	66	102	96	109	127	29
YMR043W	12	4	4	5	1	6	42	52	18	69	42	64	0	0	4	0	3	0	16	22	14	32	13	18	1	9	0	4	0	3	0	16	0	6	0	7	4	0	2	0	3	0	20	0	9	4	13	4	19
YMR196W	165	67	83	96	54	61	85	138	104	141	103	180	35	75	58	28	41	38	54	67	24	45	21	98	32	271	22	257	23	210	14	268	18	136	11	244	68	42	89	62	60	81	228	73	146	113	147	123	67
YMR233W	119	81	77	147	57	85	169	605	141	549	189	718	116	567	142	294	111	283	145	541	68	438	36	410	27	194	16	280	19	210	17	341	19	168	14	295	65	78	30	68	53	126	115	54	60	78	99	84	30
YMR281W	259	259	127	331	71	194	252	473	230	533	251	682	123	758	182	341	118	484	227	1221	96	910	64	1129	55	761	31	835	38	594	40	474	25	240	20	511	110	183	98	165	94	331	273	164	143	245	188	301	204
YMR288W	131	74	69	131	48	58	76	113	79	122	79	142	147	653	197	419	136	469	90	127	23	155	19	152	13	91	13	182	16	120	26	204	21	105	17	182	66	33	50	35	57	87	148	49	99	72	94	104	47
YNL024C	88	43	71	51	28	37	128	283	130	299	174	344	242	1169	354	450	276	601	144	115	57	145	33	172	14	86	6	135	14	78	18	279	17	148	7	255	100	95	53	114	54	167	87	33	70	53	65	73	75
YNL024C-A	0	0	0	0	0	0	0	0	0	0	0	0	0	0	0	0	0	0	0	0	0	0	0	0	0	0	0	0	0	0	0	0	0	0	0	0	0	0	0	0	0	0	0	0	0	0	0	0	0
YNL067W	331	107	164	151	96	89	38	27	30	20	29	35	160	238	217	120	183	117	27	12	7	1	2	0	37	330	23	383	22	281	44	388	43	189	25	376	178	224	164	222	154	330	492	95	269	151	317	154	86
YNL075W	0	0	0	0	0	0	0	0	0	0	0	0	0	0	0	0	0	0	0	0	0	0	0	0	0	0	0	0	0	0	0	0	0	0	0	0	0	0	0	0	0	0	0	0	0	0	0	0	0
YNL149C	141	198	87	258	38	152	41	67	23	97	28	109	109	691	180	366	125	485	15	220	16	182	10	237	18	139	10	193	10	121	23	378	15	181	15	343	68	71	43	90	46	156	192	79	122	176	129	209	46
YNL187W	19	30	9	56	4	29	4	0	6	0	3	5	0	0	0	0	0	0	0	0	3	0	0	0	0	0	0	0	1	0	1	0	0	0	0	0	2	0	4	0	2	0	10	1	4	4	3	2	1
YNR015W	116	97	83	178	36	101	52	100	53	117	62	129	178	648	260	453	176	471	124	82	23	39	9	113	29	247	19	295	18	216	22	264	18	162	11	261	58	49	53	48	58	82	228	81	139	174	152	166	78
YNR036C	192	146	147	227	63	141	212	318	161	341	208	460	93	304	153	136	87	142	82	373	81	378	45	168	47	198	19	247	29	206	42	565	37	297	19	600	148	168	113	222	107	320	410	173	219	321	245	301	147
YNR074C	293	252	159	404	91	199	228	408	198	408	206	659	130	586	224	269	138	348	162	807	75	580	45	643	29	422	17	496	26	459	27	569	21	241	16	585	138	130	121	180	75	317	242	112	129	164	141	200	73
YOL049W	302	213	198	334	85	203	205	506	201	496	270	714	98	273	148	150	108	105	137	368	86	239	47	283	58	484	40	808	34	369	55	506	37	248	28	471	199	164	140	160	131	263	459	227	281	352	292	348	78
YOL061W	255	213	155	362	87	217	158	297	127	290	140	375	153	283	229	219	167	237	141	503	62	263	40	463	47	364	23	460	37	348	38	551	30	256	23	511	154	194	137	191	127	363	443	147	227	233	264	287	94
YOL147C	177	115	116	190	54	128	134	290	105	308	149	407	117	487	166	191	121	219	95	399	36	420	38	441	29	103	17	122	21	155	32	388	33	225	17	400	124	122	83	136	72	180	275	138	153	226	193	261	71
YOR092W	0	0	0	0	0	0	0	0	0	0	0	0	0	0	0	0	0	0	0	0	0	0	0	0	0	0	0	0	0	0	0	0	0	0	0	0	0	0	0	0	0	0	0	0	0	0	0	0	0
YOR241W	311	224	198	311	93	174	126	186	93	202	118	313	254	655	339	347	278	319	59	215	43	121	24	143	40	402	27	369	38	377	56	694	40	413	25	719	240	361	185	413	224	650	541	180	291	286	366	367	163
YOR258W	35	16	18	22	8	15	6	15	4	20	7	18	2	0	14	0	5	0	0	0	1	0	1	0	26	18631	16	18363	13	14893	7	156	8	54	4	141	31	36	30	24	13	56	40	19	26	33	38	45	12
YOR347C	204	170	141	262	57	150	144	328	125	274	145	398	68	157	92	98	59	114	91	214	40	142	19	130	35	262	19	320	18	200	43	518	24	307	32	545	128	171	103	196	92	267	328	170	168	233	227	273	62
YOR360C	179	96	148	141	75	87	187	89	143	68	182	115	55	39	112	46	63	54	76	78	66	18	45	30	40	13	21	14	13	7	34	361	35	228	18	454	154	3	91	4	116	3	513	92	289	146	303	158	82
YPL045W	231	213	167	296	111	175	169	287	144	262	179	386	280	1501	529	769	375	912	102	387	51	297	46	306	40	171	16	148	18	109	51	422	33	262	30	414	164	234	133	208	127	377	290	123	166	214	218	240	145
YPL051W	177	151	91	262	43	156	112	240	111	286	152	350	14	0	34	0	16	0	89	460	63	342	27	327	23	268	13	288	17	296	42	350	31	218	16	411	102	168	97	193	72	281	209	92	119	161	146	173	164
YPL079W	322	320	246	444	104	267	137	216	115	201	121	232	166	882	222	404	108	437	71	77	47	52	32	111	40	112	21	55	25	82	66	819	58	467	40	825	157	122	142	134	140	176	575	229	308	340	397	448	101
YPL088W	252	220	167	313	84	222	229	449	186	433	236	513	288	1294	397	641	310	839	158	621	89	608	37	702	37	430	39	532	30	306	42	464	40	225	21	452	178	307	130	311	144	474	373	181	198	246	256	324	307
YPL090C	134	62	111	86	50	62	193	279	157	308	197	389	74	100	135	49	92	105	65	146	77	100	41	112	33	68	18	88	16	29	52	341	27	201	17	381	112	69	98	84	97	165	287	112	180	173	206	233	85
YPL113C	0	0	0	0	0	0	0	0	0	0	0	0	0	0	0	0	0	0	0	0	0	0	0	0	0	0	0	0	0	0	0	0	0	0	0	0	0	0	0	0	0	0	0	0	0	0	0	0	0
YPL157W	196	121	129	211	57	114	131	253	112	262	156	341	143	624	244	339	144	384	91	417	55	410	25	285	38	381	19	270	21	257	27	289	24	170	11	329	126	170	96	178	96	345	288	166	194	255	215	264	104
YPL160W	178	75	122	156	63	91	147	205	132	172	142	228	75	255	145	127	70	156	78	254	46	124	24	132	23	81	15	115	18	87	43	376	27	217	19	348	119	84	91	87	76	137	324	108	195	183	243	194	80
YPL245W	149	111	87	134	45	104	89	149	88	171	113	182	24	58	55	34	32	38	47	87	39	30	24	67	34	333	10	303	24	227	23	328	15	167	7	331	87	147	80	126	85	219	226	88	157	175	179	187	121
YPL250C	97	127	52	170	42	106	125	217	106	234	132	331	32	45	29	23	26	35	91	180	35	114	27	150	10	145	6	91	1	85	23	290	10	155	8	371	41	25	27	23	30	59	111	45	67	56	70	59	24
YPR002W	226	162	133	247	89	147	151	213	137	202	140	273	168	896	263	509	220	515	87	346	52	200	27	336	51	457	25	602	26	466	39	496	33	255	18	432	123	142	104	126	84	202	378	172	206	225	213	307	183
YPR062W	266	234	144	375	83	193	106	197	87	189	132	277	211	1407	281	720	249	819	160	1437	65	1298	32	1065	37	207	20	195	30	174	57	516	46	302	20	566	114	163	110	161	110	291	371	179	206	317	273	317	167
YPR163C	227	206	144	364	85	194	120	173	134	176	132	286	59	73	80	32	63	74	97	110	34	88	17	112	32	107	13	137	13	110	27	347	21	135	14	332	91	99	86	118	72	193	244	79	124	142	175	179	106
YAL013W	285	252	171	361	86	193	198	302	159	304	172	453	121	381	170	212	132	281	142	617	71	646	37	456	63	669	33	707	44	628	75	752	53	451	32	704	170	332	193	372	158	545	436	222	261	350	339	395	99
YAL019W	141	78	89	113	43	81	96	163	91	180	111	217	80	207	98	106	75	141	77	149	22	133	28	104	21	109	8	73	15	126	27	384	35	195	8	349	108	89	85	117	93	193	234	60	101	89	146	113	117
YAL025C	0	0	0	0	0	0	0	0	0	0	0	0	0	0	0	0	0	0	0	0	0	0	0	0	0	0	0	0	0	0	0	0	0	0	0	0	0	0	0	0	0	0	0	0	0	0	0	0	0
YAL027W	100	82	71	161	35	102	43	110	36	97	68	157	13	0	14	0	16	0	37	22	12	22	7	55	10	106	9	171	11	117	19	299	14	124	10	287	48	33	20	52	29	78	102	59	53	60	65	79	38
YAL039C	106	39	61	56	34	42	110	279	124	324	144	431	125	571	199	253	132	350	126	774	70	595	37	428	37	605	22	636	19	476	24	466	18	219	20	450	77	72	73	60	58	123	232	116	137	186	145	233	99
YAL040C	66	19	40	28	27	15	107	154	97	206	124	229	9	0	19	0	9	0	75	326	43	381	19	295	7	42	3	40	7	41	19	74	26	47	14	59	40	20	27	21	21	24	62	27	31	38	40	39	51
YAL047C	0	0	0	0	0	0	0	0	0	0	0	0	0	0	0	0	0	0	0	0	0	0	0	0	0	0	0	0	0	0	0	0	0	0	0	0	0	0	0	0	0	0	0	0	0	0	0	0	0
YAL053W	10	0	4	0	4	0	45	86	69	59	67	111	4	0	2	0	3	0	20	81	18	37	13	44	0	0	2	0	3	6	3	23	0	16	1	12	25	33	18	28	17	57	17	4	17	6	14	4	5
YAL058W	0	0	0	0	0	0	0	0	0	0	0	0	0	0	0	0	0	0	0	0	0	0	0	0	0	0	0	0	0	0	0	0	0	0	0	0	0	0	0	0	0	0	0	0	0	0	0	0	0
YAR002C-A	40	51	33	47	10	28	94	213	98	211	124	337	4	0	5	0	6	0	75	382	48	299	28	304	1	26	2	32	3	21	9	131	8	79	2	118	23	46	23	40	15	77	52	24	20	31	21	31	12
YBL016W	224	193	156	280	71	165	150	316	149	312	173	376	262	1322	441	644	303	869	126	443	69	513	48	513	57	605	21	457	37	533	62	641	31	341	22	630	135	236	104	241	122	365	309	150	166	300	181	322	167
YBL027W	114	51	71	100	35	43	29	87	37	97	45	135	16	0	23	0	11	0	33	43	11	53	12	15	12	21	10	41	12	2	41	296	22	161	16	245	70	85	66	99	77	176	358	146	197	236	236	290	148
YBL033C	18	34	8	58	6	27	43	98	31	93	34	88	4	0	5	0	3	0	87	911	34	858	10	637	2	107	0	149	5	68	3	13	1	4	0	11	6	3	7	5	5	9	53	21	27	33	31	40	25
YBL080C	40	31	22	40	12	25	37	51	29	38	36	70	5	0	13	0	7	0	7	28	16	37	7	0	4	52	6	94	4	56	9	85	7	51	8	97	23	44	23	38	24	67	57	20	24	38	32	32	32
YBL095W	0	0	0	0	0	0	0	0	0	0	0	0	0	0	0	0	0	0	0	0	0	0	0	0	0	0	0	0	0	0	0	0	0	0	0	0	0	0	0	0	0	0	0	0	0	0	0	0	0
YBR005W	61	15	28	31	22	12	159	341	156	356	202	539	80	496	176	342	111	403	148	574	54	542	41	431	14	110	6	144	10	105	13	135	9	100	10	177	20	18	20	37	22	51	51	14	25	29	35	25	85
YBR006W	173	197	112	379	80	221	124	200	97	178	113	301	18	0	38	2	14	1	136	313	34	322	19	272	24	374	27	375	13	371	27	389	12	150	15	337	121	137	82	168	58	322	259	126	122	178	155	213	37
YBR010W	181	47	129	48	64	44	229	250	199	246	236	349	77	175	112	52	68	96	104	191	81	246	57	171	51	284	21	273	29	215	47	330	35	90	26	226	145	64	107	57	105	139	396	61	208	119	258	151	124
YBR013C	200	176	118	291	64	145	168	297	144	254	174	393	175	761	253	389	170	428	104	547	52	549	32	420	40	259	16	310	17	255	50	515	26	210	20	585	126	190	112	246	95	388	276	155	167	199	186	277	121
YBR015C	0	0	0	0	0	0	0	0	0	0	0	0	0	0	0	0	0	0	0	0	0	0	0	0	0	0	0	0	0	0	0	0	0	0	0	0	0	0	0	0	0	0	0	0	0	0	0	0	0
YBR016W	117	83	69	113	38	70	50	102	49	106	45	147	16	0	15	0	11	0	49	175	15	130	19	167	16	203	12	291	7	209	26	322	22	186	5	311	77	128	62	148	65	215	77	45	74	54	71	60	133
YBR024W	609	515	362	803	205	518	427	763	356	832	456	1091	252	1131	414	600	222	715	358	1706	157	1399	107	1134	76	874	69	1205	70	842	115	1183	94	659	56	1234	306	433	266	437	249	736	818	406	473	594	560	694	294
YBR038W	0	0	0	0	0	0	0	0	0	0	0	0	0	0	0	0	0	0	0	0	0	0	0	0	0	0	0	0	0	0	0	0	0	0	0	0	0	0	0	0	0	0	0	0	0	0	0	0	0
YBR039W	261	197	145	322	86	188	174	350	173	351	195	463	132	536	198	294	128	309	135	631	75	659	40	520	35	270	29	323	26	191	47	659	38	354	21	670	123	122	98	139	94	264	405	201	235	279	293	346	139
YBR055C	174	78	123	146	72	96	233	401	188	365	232	469	55	147	124	79	80	98	235	608	70	499	64	440	41	195	25	140	24	165	35	323	34	157	17	360	128	151	114	180	108	295	262	73	208	137	198	162	104
YBR086C	0	0	0	0	0	0	0	0	0	0	0	0	0	0	0	0	0	0	0	0	0	0	0	0	0	0	0	0	0	0	0	0	0	0	0	0	0	0	0	0	0	0	0	0	0	0	0	0	0
YBR088C	292	313	197	488	95	268	254	568	235	576	289	739	32	1	45	0	34	0	295	1653	105	1363	74	1270	36	344	28	331	28	305	46	456	34	242	24	435	131	99	99	140	97	236	335	160	196	256	200	257	125
YBR091C	138	162	109	241	67	132	91	220	84	221	105	280	52	242	82	126	58	157	170	1399	47	1075	40	1187	35	544	22	444	29	433	27	389	20	224	21	350	126	199	96	200	92	325	200	83	130	151	151	164	129
YBR095C	145	128	102	188	39	110	122	237	106	256	121	306	36	78	58	19	32	55	127	516	47	503	29	451	37	317	27	277	21	188	39	368	24	229	18	418	93	97	77	115	84	166	217	111	157	174	148	229	47
YBR098W_1	184	115	98	161	65	106	106	239	84	219	104	303	58	139	109	141	78	149	27	220	32	177	32	117	28	220	20	252	21	313	32	289	22	146	8	216	125	132	92	117	78	181	269	85	138	134	172	158	84
YBR119W	0	0	0	0	0	0	0	0	0	0	0	0	0	0	0	0	0	0	0	0	0	0	0	0	0	0	0	0	0	0	0	0	0	0	0	0	0	0	0	0	0	0	0	0	0	0	0	0	0
YBR132C	117	60	66	88	36	61	117	195	84	203	123	231	83	328	122	167	101	225	83	389	36	228	25	318	31	181	12	157	12	169	30	333	27	176	18	281	80	65	72	79	72	168	224	95	108	150	159	164	121
YBR146W	216	152	137	252	55	135	153	244	131	240	154	326	276	1160	444	589	302	688	88	286	52	340	33	331	50	332	22	252	18	232	44	464	26	256	17	532	137	198	120	153	116	310	376	158	226	285	252	332	190
YBR158W	20	23	16	32	4	13	115	194	78	138	108	185	2	0	2	0	5	0	72	289	28	177	13	325	4	46	2	62	1	43	12	101	7	51	5	98	17	47	27	71	33	120	27	5	12	19	18	14	5
YBR164C	240	201	140	349	68	198	194	386	155	374	193	535	101	625	154	264	96	354	162	416	74	420	39	300	36	449	27	328	21	356	25	531	22	263	23	561	99	104	69	118	80	192	325	132	154	204	184	242	104
YBR172C	136	70	98	93	57	50	99	92	82	81	101	147	30	47	54	35	43	50	52	40	26	34	17	18	13	110	15	96	24	76	36	289	19	92	11	191	85	36	78	44	78	74	244	89	141	109	146	129	53
YBR173C	171	114	92	230	54	96	55	111	64	99	70	157	172	662	332	422	212	438	62	323	25	335	13	354	29	459	15	363	16	433	15	364	27	184	23	435	73	110	73	162	50	247	279	143	165	198	175	250	126
YBR182C	126	94	97	185	45	108	78	157	62	158	80	183	9	0	18	0	15	0	50	232	35	361	15	312	18	100	10	111	19	75	21	249	20	123	16	263	53	51	54	72	43	91	218	82	115	156	119	158	96
YBR183W	326	310	184	498	105	290	192	374	155	418	199	495	154	472	152	214	125	321	204	669	59	505	61	385	37	269	14	358	23	406	31	544	23	282	19	439	97	123	97	109	95	228	329	177	187	234	191	300	145
YBR186W	179	125	127	214	71	102	131	261	118	251	135	356	104	602	151	196	106	254	169	688	49	544	41	464	44	428	24	490	36	326	36	304	19	166	11	385	107	202	86	202	91	334	286	119	144	166	198	228	94
YBR188C	168	136	126	191	75	104	222	462	187	441	252	664	35	0	46	0	34	0	206	499	50	522	80	388	29	57	19	132	24	103	37	339	21	174	17	320	112	142	110	171	119	271	253	105	153	111	176	182	259
YBR193C	321	260	212	358	92	208	219	385	180	444	236	561	153	851	272	320	172	408	133	471	75	347	47	529	57	333	33	398	26	303	74	784	30	408	29	713	167	248	160	268	141	439	375	187	240	319	306	370	216
YBR195C	161	109	97	203	57	128	108	139	79	120	103	171	72	388	130	265	69	261	73	247	33	213	19	172	20	143	11	91	14	96	24	340	19	221	19	459	77	38	70	53	54	94	303	106	125	132	192	177	77
YBR202W	169	109	89	157	48	88	92	163	83	156	93	240	21	0	49	0	32	0	121	766	34	722	24	585	16	102	13	52	10	60	23	313	18	131	11	335	92	53	57	70	71	122	227	56	91	70	171	102	50
YBR212W	247	346	174	521	94	270	177	321	149	344	205	375	56	224	110	56	61	87	343	676	67	509	34	597	46	1063	16	1096	24	939	27	511	29	305	16	540	107	147	97	170	114	195	213	95	120	150	166	164	88
YBR216C	230	124	112	214	75	120	155	248	136	264	142	401	81	555	136	202	68	275	149	668	41	342	18	568	28	450	18	530	17	541	52	490	24	213	24	618	105	103	110	153	66	288	271	98	143	124	184	202	27
YBR223C	72	23	55	43	27	32	96	142	78	142	87	200	26	7	45	6	32	0	84	300	31	162	25	175	25	313	18	258	16	276	22	310	24	164	19	297	119	251	121	252	104	378	269	83	122	169	181	178	31
YBR228W	215	165	142	232	69	153	231	436	190	449	212	548	19	0	59	0	33	0	135	718	112	648	58	793	51	774	25	756	36	673	61	766	24	320	24	653	145	174	105	224	112	358	344	132	179	232	243	233	148
YBR231C	299	496	155	809	96	418	180	477	130	439	126	663	211	3176	321	1555	193	1829	331	8077	67	6322	52	6100	43	2068	19	1865	24	1345	41	780	25	347	18	723	140	393	107	445	91	846	317	261	134	331	197	396	140
YBR241C	50	7	42	15	13	10	78	140	65	130	91	181	101	310	164	129	99	148	75	267	29	201	27	128	21	571	14	569	15	433	20	197	10	86	7	154	61	41	40	49	42	92	91	21	53	24	60	26	42
YBR245C	112	44	84	75	43	39	90	183	72	190	105	253	19	0	37	0	20	0	78	149	31	109	16	81	33	130	22	156	20	175	35	435	40	239	26	347	163	173	112	202	104	292	330	87	169	105	186	136	94
YBR246W	282	215	185	359	105	210	247	482	246	505	247	651	59	121	104	97	81	64	255	1753	93	1793	83	1511	70	931	44	974	40	661	54	705	41	302	26	602	206	319	167	336	153	578	419	168	264	261	276	334	258
YBR248C	0	0	0	0	0	0	0	0	0	0	0	0	0	0	0	0	0	0	0	0	0	0	0	0	0	0	0	0	0	0	0	0	0	0	0	0	0	0	0	0	0	0	0	0	0	0	0	0	0
YBR252W	0	0	0	0	0	0	0	0	0	0	0	0	0	0	0	0	0	0	0	0	0	0	0	0	0	0	0	0	0	0	0	0	0	0	0	0	0	0	0	0	0	0	0	0	0	0	0	0	0
YBR273C	138	147	113	191	48	122	62	113	49	117	68	162	13	0	32	0	28	0	17	179	36	151	18	148	18	54	12	52	15	22	29	293	28	177	12	330	67	44	24	48	53	59	133	47	70	117	86	114	35
YBR293W	111	102	53	157	36	90	19	37	12	33	21	43	93	649	135	302	94	289	2	32	7	8	1	0	12	286	6	256	10	161	12	148	12	97	7	156	30	33	39	24	33	61	123	55	60	85	82	81	59
YBR295W	109	42	75	69	42	36	98	141	79	106	85	158	25	0	25	0	21	0	30	37	29	6	16	53	25	243	11	181	11	245	34	188	27	97	17	211	102	66	100	60	90	119	244	58	158	73	173	101	84
YBR296C-A	300	315	195	500	104	283	233	433	177	462	235	697	168	887	282	410	188	508	264	1307	91	719	67	790	31	472	26	658	28	431	47	692	47	362	18	668	177	256	116	279	130	497	398	213	219	321	251	400	186
YCL008C	79	51	49	78	22	39	21	16	11	16	18	15	16	0	15	0	10	0	0	6	6	8	0	0	13	34	6	35	11	19	17	180	13	77	4	150	49	81	46	84	44	166	111	63	59	100	85	114	52
YCL028W	0	0	0	0	0	0	0	0	0	0	0	0	0	0	0	0	0	0	0	0	0	0	0	0	0	0	0	0	0	0	0	0	0	0	0	0	0	0	0	0	0	0	0	0	0	0	0	0	0
YCL031C_1	242	175	162	281	80	165	140	206	118	200	127	254	33	2	66	0	37	1	120	339	57	302	34	290	61	287	26	330	49	305	54	651	26	339	27	688	169	193	124	231	137	402	418	154	262	298	275	266	87
YCL032W	116	105	71	192	46	104	52	87	27	86	54	98	126	502	204	243	131	286	18	63	22	58	13	49	33	375	30	404	21	247	25	292	18	133	13	253	63	67	68	57	54	76	267	122	152	154	155	170	72
YCL045C	152	117	81	136	57	106	52	61	47	74	63	70	89	219	138	102	73	120	37	44	20	50	15	47	27	96	15	121	17	151	24	365	24	215	17	356	128	249	112	234	85	447	209	80	139	99	132	151	49
YCL048W	147	115	105	182	61	106	165	319	165	336	215	428	114	880	205	450	154	459	132	962	71	815	31	864	39	242	13	260	29	224	48	466	29	267	22	435	134	177	112	212	129	318	392	161	194	278	297	358	251
YCL049C	199	169	137	278	79	169	175	323	141	291	185	409	90	386	123	204	88	180	90	584	46	331	32	280	44	755	30	941	27	604	40	526	37	303	28	645	112	165	121	148	88	183	287	170	194	252	207	285	309
YCL057W	87	56	69	115	45	51	40	79	36	66	45	114	70	135	101	110	64	40	13	49	12	22	12	38	18	86	12	25	10	95	24	191	13	105	12	157	90	56	65	71	55	111	198	67	138	130	145	145	46
YCR014C	186	126	117	190	69	125	153	337	158	284	173	371	109	416	145	208	99	284	180	298	66	298	39	273	21	173	21	353	16	189	33	339	32	149	14	333	118	102	84	116	85	189	251	93	155	167	208	180	90
YCR027C	154	137	109	203	64	126	99	188	86	167	106	218	142	650	189	328	156	378	44	212	38	184	22	130	17	181	13	166	11	130	22	279	18	154	12	287	66	79	57	64	44	132	208	90	144	141	114	156	78
YCR044C	115	121	69	180	41	95	28	52	23	44	33	56	7	0	18	0	8	0	27	36	10	27	9	16	20	171	10	238	14	208	21	452	25	206	10	356	40	28	35	32	28	43	180	89	138	191	138	187	27
YCR048W	127	93	83	162	40	84	83	111	56	95	81	138	178	423	249	215	192	236	56	145	28	78	13	51	20	328	12	279	9	250	20	262	13	159	10	306	37	72	61	83	60	89	222	89	132	128	164	157	48
YCR063W	162	175	115	288	67	167	148	245	114	287	148	369	184	878	272	481	181	719	127	108	49	207	38	126	20	209	15	186	14	134	23	356	24	180	12	381	80	70	53	101	68	124	291	131	140	204	188	217	88
YDL002C	166	139	123	224	61	152	162	370	140	378	182	439	159	703	184	373	155	546	207	823	66	653	33	599	36	274	30	385	17	279	46	662	37	342	24	547	120	178	116	152	131	306	387	201	198	281	265	337	104
YDL010W	0	0	0	0	0	0	108	200	70	193	120	309	2	0	0	0	0	0	165	802	55	664	38	566	2	0	0	0	0	0	0	0	0	0	0	0	0	0	4	0	1	0	6	1	7	0	2	6	2
YDL030W	83	45	47	70	26	42	76	102	70	97	74	128	54	94	60	94	52	81	36	324	20	268	27	225	20	80	5	157	12	89	25	333	17	162	11	317	65	70	58	80	70	148	262	115	143	178	178	197	81
YDL051W	212	74	143	141	69	81	157	289	114	275	169	337	88	208	109	115	85	106	114	240	68	181	37	267	34	43	13	64	33	72	50	509	40	314	21	544	95	49	74	46	85	82	281	114	177	215	192	235	119
YDL057W	115	63	74	83	41	53	61	56	55	66	58	68	15	0	41	0	27	0	53	200	17	193	21	70	18	86	17	127	15	47	15	178	11	68	10	128	68	30	80	48	78	68	226	63	124	116	164	105	68
YDL065C	344	297	212	442	150	247	117	187	102	220	152	261	168	782	256	429	206	440	53	89	36	104	19	93	52	259	33	382	33	352	53	560	50	387	36	647	160	222	146	227	155	396	410	177	253	320	293	378	187
YDL076C	104	76	60	123	38	62	167	301	146	333	172	460	53	53	71	17	54	46	61	80	41	57	31	29	18	23	7	31	17	36	31	364	22	179	18	357	61	59	45	56	60	105	137	39	84	67	81	77	66
YDL082W	207	104	110	161	78	82	123	206	88	219	128	258	57	54	72	27	63	16	68	50	30	47	22	42	19	25	13	21	23	18	37	312	32	152	16	274	113	105	94	97	88	161	309	97	176	157	215	177	55
YDL093W	22	6	9	8	6	3	43	42	17	28	36	48	0	0	2	0	3	0	23	55	14	61	9	47	11	33	2	39	2	36	6	41	3	29	1	48	22	42	26	51	23	71	24	8	9	15	14	14	13
YDL097C	43	43	18	74	17	33	23	24	22	22	29	38	25	153	51	81	20	81	44	93	5	36	1	52	3	47	2	71	4	70	6	103	4	34	4	143	18	14	23	13	10	65	46	25	21	25	39	50	16
YDL099W	103	109	52	153	38	74	66	155	73	134	85	214	10	0	10	0	13	0	37	41	26	85	13	102	18	250	7	323	8	220	12	156	7	78	7	187	65	110	52	139	56	220	176	102	114	136	116	165	108
YDL117W	259	152	167	237	103	152	111	191	98	205	131	257	132	473	172	180	109	235	104	67	43	18	16	46	31	206	24	211	23	107	55	350	40	179	20	293	152	133	128	147	139	219	328	97	185	135	245	199	93
YDL122W	148	69	92	129	52	62	103	185	108	188	127	228	56	132	110	84	49	92	93	108	30	72	26	74	24	70	22	77	13	45	29	208	10	97	18	213	96	70	68	79	67	114	259	68	128	90	168	115	85
YDL125C	21	5	15	13	5	6	43	27	41	48	25	53	5	0	10	0	1	0	81	277	15	135	7	213	3	0	4	0	1	0	3	20	2	6	2	32	20	13	14	10	15	19	41	20	15	14	24	28	22
YDL126C	0	0	0	0	0	0	5	1	4	1	2	1	0	0	0	0	0	0	0	1	1	0	0	0	0	0	0	0	0	0	0	0	0	0	0	0	0	0	0	0	0	0	0	0	0	0	0	0	0
YDL142C	14	0	7	0	4	0	70	103	49	96	70	155	1	0	1	0	4	0	70	165	25	125	14	200	7	36	9	10	2	61	2	29	4	21	1	32	6	0	2	0	2	0	25	9	10	12	15	13	45
YDL157C	0	0	0	0	0	0	0	0	0	0	0	0	0	0	0	0	0	0	0	0	0	0	0	0	0	0	0	0	0	0	0	0	0	0	0	0	0	0	0	0	0	0	0	0	0	0	0	0	0
YDL159W	303	231	157	329	77	200	182	433	188	425	203	520	101	628	190	313	156	303	92	512	80	558	55	511	50	503	36	437	32	481	52	580	41	324	27	529	131	99	115	95	109	147	342	141	203	239	253	305	141
YDL173W	134	110	89	184	42	113	73	146	87	170	86	240	36	12	48	9	45	8	51	123	24	39	31	23	23	252	24	291	17	354	30	246	21	139	14	309	111	219	120	239	112	418	239	96	136	176	153	173	71
YDL179W	123	121	69	187	53	109	85	142	83	161	87	228	10	0	21	0	13	0	75	546	41	346	33	470	24	192	13	97	9	160	14	177	8	96	10	153	73	110	63	95	52	125	112	58	70	83	70	99	89
YDL181W	372	392	275	575	131	384	174	298	141	339	199	477	35	83	80	96	72	72	199	628	67	556	33	486	45	527	33	558	19	395	63	835	46	433	45	768	176	220	122	229	123	338	447	267	238	440	306	474	152
YDL183C	135	89	109	157	42	95	114	290	92	268	112	354	138	878	232	419	141	496	129	904	42	615	25	614	32	500	27	541	31	288	38	593	30	300	21	556	117	123	76	98	75	215	307	193	202	279	230	281	166
YDL197C	99	55	65	70	22	56	22	26	18	20	29	27	21	32	28	6	14	21	6	45	6	48	7	38	16	172	12	94	15	157	14	194	22	119	10	226	81	135	63	167	57	278	207	81	107	130	128	126	79
YDL216C	0	0	0	0	0	0	0	0	0	0	0	0	0	0	0	0	0	0	0	0	0	0	0	0	0	0	0	0	0	0	0	0	0	0	0	0	0	0	0	0	0	0	0	0	0	0	0	0	0
YDL218W	257	212	138	334	82	223	152	290	145	292	156	367	164	1075	245	590	182	547	141	797	64	762	32	809	36	411	21	488	21	322	40	440	31	217	22	468	130	164	110	194	82	289	319	167	188	274	236	282	167
YDL219W	237	233	157	386	65	225	119	259	94	282	140	429	103	380	142	196	106	226	103	366	55	301	30	451	43	390	26	521	22	434	40	593	32	319	13	632	122	109	94	185	95	290	347	136	195	289	201	283	86
YDL220C	211	101	151	197	51	116	148	245	118	254	162	300	361	1313	560	645	379	727	131	417	44	337	21	339	54	215	35	251	26	190	44	424	30	215	27	350	149	149	128	158	116	238	374	109	217	177	259	214	207
YDL222C	225	65	109	92	65	56	107	176	87	171	101	226	18	1	39	2	20	0	74	363	25	328	19	291	34	254	24	241	30	165	27	373	21	194	13	470	101	43	98	52	96	76	245	106	163	147	197	185	202
YDL230W	405	370	245	602	112	385	190	490	203	469	260	598	209	1089	345	674	244	649	307	1388	101	1293	37	1168	62	1002	49	1228	36	937	61	670	56	400	27	677	218	295	175	286	163	526	488	254	295	416	340	445	252
YDL234C	38	20	17	18	13	21	85	133	52	145	68	185	6	1	3	0	6	0	52	242	25	269	28	229	5	47	3	55	3	34	7	47	3	19	1	32	14	0	14	0	17	0	46	7	24	14	21	18	5
YDR002W	198	23	121	31	64	13	191	31	168	23	206	31	44	7	73	4	46	1	129	5	73	4	28	15	24	6	22	0	31	9	24	62	28	21	17	62	148	18	109	11	72	28	358	10	222	31	289	35	72
YDR003W	188	121	137	227	70	133	92	198	82	214	93	273	156	809	261	408	208	488	142	424	24	179	18	329	40	304	21	317	19	232	43	469	38	237	24	442	128	170	104	183	104	302	352	168	208	275	234	303	126
YDR004W	471	466	320	641	170	404	225	505	238	436	259	682	276	1344	480	598	376	694	211	342	94	385	47	360	73	687	55	657	65	493	65	874	61	476	34	837	305	367	258	453	219	642	710	308	449	452	474	506	233
YDR019C	183	134	124	214	58	133	105	185	98	203	122	255	126	737	245	438	152	494	118	1025	56	1016	32	686	28	319	24	380	24	345	23	342	23	186	19	398	103	184	79	190	82	294	258	103	134	184	160	182	123
YDR027C	98	52	59	72	32	50	59	90	62	96	75	102	15	0	31	0	24	0	51	71	26	55	20	26	12	37	9	68	17	69	14	142	9	71	9	147	78	55	61	61	50	78	154	47	92	58	97	79	24
YDR046C	0	0	0	0	0	0	0	0	0	0	0	0	0	0	0	0	0	0	0	0	0	0	0	0	0	0	0	0	0	0	0	0	0	0	0	0	0	0	0	0	0	0	0	0	0	0	0	0	0
YDR047W	214	185	129	277	69	162	142	248	128	254	145	333	25	0	38	0	30	0	46	225	55	91	31	172	34	129	15	62	14	109	53	497	44	262	31	429	70	61	75	74	59	113	227	100	141	170	151	158	181
YDR059C	277	218	211	398	102	233	273	538	209	563	262	735	198	934	275	484	230	584	345	1122	129	1032	50	855	40	292	31	371	34	299	64	905	58	487	44	934	215	289	202	330	151	518	593	286	349	471	329	504	217
YDR061W	0	0	0	0	0	0	0	0	0	0	0	0	0	0	0	0	0	0	0	0	0	0	0	0	0	0	0	0	0	0	0	0	0	0	0	0	0	0	0	0	0	0	0	0	0	0	0	0	0
YDR068W	295	263	209	449	76	266	161	387	152	340	147	433	275	1273	369	584	281	725	83	177	55	163	25	154	31	264	27	182	20	210	45	753	35	310	29	671	144	225	109	224	93	353	287	158	184	264	217	251	183
YDR069C	220	139	146	224	73	117	75	156	92	168	77	178	29	0	59	0	37	0	71	111	23	103	19	118	35	253	25	221	28	217	41	312	36	136	23	260	160	149	93	155	113	254	417	107	253	157	278	194	137
YDR070C	217	189	142	336	66	200	35	30	31	35	37	46	133	558	158	215	113	302	8	41	18	10	4	29	50	514	26	769	41	488	38	703	46	353	21	742	127	164	102	206	126	322	362	148	203	261	202	276	196
YDR079W	100	54	54	83	43	35	189	380	176	384	206	527	18	0	27	0	19	0	157	1286	80	924	50	956	20	472	17	678	18	502	30	382	16	201	14	403	81	136	69	137	68	257	112	55	68	88	53	100	114
YDR082W	173	113	110	176	58	95	248	370	236	377	274	526	325	1479	491	689	376	780	158	308	77	329	56	203	41	455	23	415	34	389	36	374	24	210	20	413	127	171	126	174	123	291	228	72	135	90	141	101	119
YDR096W	279	69	135	133	78	58	73	111	74	97	64	116	78	161	194	119	121	69	34	142	26	67	9	52	33	85	21	61	22	62	108	210	52	114	27	189	102	68	86	74	77	114	315	53	168	88	194	119	83
YDR108W	188	126	120	204	59	104	153	288	125	334	158	391	173	899	251	378	172	429	46	97	52	44	26	15	39	230	21	225	15	158	40	383	27	235	27	412	130	172	135	215	116	355	339	119	202	201	198	219	128
YDR137W	293	205	172	300	112	176	165	358	153	323	187	448	328	1423	475	757	375	850	79	810	77	605	31	423	50	337	29	358	41	305	45	570	39	316	28	546	172	225	136	197	134	283	485	202	279	277	336	310	230
YDR143C	167	128	104	195	55	104	142	189	135	154	164	228	99	685	176	349	118	384	86	177	51	131	21	145	36	229	22	260	16	191	39	404	19	214	19	442	104	122	83	119	89	200	272	127	147	155	197	194	104
YDR145W	194	138	126	219	68	115	161	300	139	305	184	397	222	1374	362	595	227	739	93	542	74	312	49	420	48	336	26	408	37	343	66	532	39	261	25	570	127	132	84	161	97	210	324	205	222	280	265	302	136
YDR151C	248	230	164	317	90	250	196	355	162	297	225	452	49	96	99	79	51	92	88	387	50	207	30	293	53	476	41	331	24	278	43	675	53	382	26	733	128	188	119	193	115	336	341	155	192	212	228	288	121
YDR152W	238	187	128	339	67	173	146	253	112	298	147	433	338	1708	506	894	356	1051	102	447	36	342	23	407	46	426	26	375	21	537	30	328	16	180	15	358	160	197	108	261	85	429	325	145	155	226	213	258	99
YDR158W	122	107	74	172	39	103	72	153	81	164	74	215	30	0	30	0	16	0	67	0	19	6	15	5	29	536	9	482	19	421	21	303	18	141	10	267	91	105	50	117	65	177	206	86	117	134	149	154	49
YDR163W	151	132	102	183	51	138	51	92	67	91	83	122	121	722	222	362	159	497	47	217	21	215	15	245	20	552	22	515	16	385	21	272	14	149	9	274	91	168	71	173	59	270	211	100	114	199	142	183	98
YDR165W	142	105	45	175	46	112	44	85	54	89	81	116	52	393	85	163	38	150	46	267	20	186	12	162	14	90	1	116	7	61	12	150	15	77	11	294	81	77	53	130	21	254	120	47	47	37	76	73	27
YDR169C	291	267	150	442	83	256	127	328	118	286	163	386	63	306	96	112	71	117	70	217	46	289	42	163	37	205	16	228	33	230	47	368	35	241	23	418	134	156	90	172	113	283	440	127	237	196	258	232	144
YDR172W	155	114	117	156	62	85	116	157	91	146	117	218	88	504	159	279	105	357	108	603	45	598	21	400	20	140	17	176	19	75	50	425	31	179	16	379	84	45	85	53	86	82	298	104	157	169	194	205	64
YDR174W	152	143	118	206	40	138	87	204	105	223	121	306	35	47	62	42	35	52	50	392	48	347	31	414	21	979	18	957	23	700	26	302	21	156	11	270	104	157	78	205	82	324	276	117	147	196	172	229	68
YDR178W	252	240	151	360	63	202	128	260	119	274	167	419	130	594	157	326	129	380	102	570	49	419	41	440	25	294	22	290	17	261	27	489	34	256	14	511	92	116	75	105	78	223	300	159	169	234	224	280	112
YDR179W-A	107	125	72	185	42	78	44	53	29	55	41	65	274	1132	297	690	216	566	17	176	6	184	7	151	19	237	8	188	15	199	14	245	14	118	11	227	66	57	49	79	49	103	107	45	69	79	90	92	25
YDR188W	0	0	0	0	0	0	0	0	0	0	0	0	0	0	0	0	0	0	0	0	0	0	0	0	0	0	0	0	0	0	0	0	0	0	0	0	0	0	0	0	0	0	0	0	0	0	0	0	0
YDR189W	120	63	70	91	38	56	124	254	117	231	138	302	89	325	179	228	103	223	50	201	43	201	21	198	29	142	8	122	16	89	31	426	22	220	16	395	91	149	105	142	88	224	241	103	152	129	150	166	98
YDR233C	274	68	193	88	89	67	93	113	72	95	100	115	17	0	34	0	14	0	68	3	26	0	15	0	18	3	13	2	18	34	31	376	24	169	25	284	129	78	93	119	120	210	149	46	74	73	80	88	16
YDR235W	49	14	0	32	23	4	2	5	10	7	14	7	2	32	19	135	4	19	8	20	3	21	7	4	0	8	1	19	0	51	1	18	1	0	7	148	3	0	3	4	0	18	19	13	4	2	3	14	0
YDR237W	228	227	164	351	77	214	133	280	146	307	155	348	86	391	157	224	103	262	129	455	60	426	24	377	47	289	27	307	32	247	45	413	26	243	19	385	118	180	142	188	99	309	331	125	165	197	211	269	88
YDR245W	180	148	92	215	53	118	152	235	113	236	146	303	87	345	128	179	88	278	78	286	39	363	24	306	30	264	18	248	23	249	36	389	21	171	17	344	108	148	79	163	88	278	222	104	118	144	178	166	47
YDR251W	203	103	106	143	88	108	118	173	112	174	114	234	19	0	39	0	27	0	49	234	23	154	27	198	18	133	17	99	12	159	50	282	55	159	32	348	122	137	91	130	104	331	286	85	146	67	216	112	94
YDR255C	175	143	44	229	71	101	46	62	58	66	42	116	78	468	138	260	40	233	70	388	9	234	8	189	13	296	4	515	7	347	12	290	16	126	19	490	63	34	45	77	19	176	161	76	51	69	94	99	19
YDR268W	210	224	146	374	63	225	157	279	128	270	161	323	56	91	79	59	54	86	110	854	61	660	31	711	36	298	20	373	18	268	41	664	36	341	20	692	106	151	99	153	81	242	301	165	167	211	196	261	90
YDR270W	0	0	0	0	0	0	0	0	0	0	0	0	0	0	0	0	0	0	0	0	0	0	0	0	0	0	0	0	0	0	0	0	0	0	0	0	0	0	0	0	0	0	0	0	0	0	0	0	0
YDR305C	386	291	266	453	128	301	299	706	255	724	302	1012	466	1313	747	752	488	852	552	2020	156	1575	95	1709	99	608	59	672	52	478	93	1041	58	533	48	1028	251	379	208	425	214	702	529	239	261	333	315	449	395
YDR315C_1	165	181	88	271	65	135	144	313	162	352	161	413	18	0	30	0	18	0	102	307	62	257	30	264	27	198	16	236	15	192	24	466	21	202	13	412	84	97	69	136	73	182	217	62	128	121	158	124	112
YDR315C_2	195	206	139	299	91	184	181	352	147	316	188	444	391	1734	607	768	404	994	152	806	71	647	34	608	65	745	38	872	32	749	60	726	30	327	22	665	200	206	173	228	134	389	450	186	310	319	316	318	144
YDR363W-A	171	172	114	236	56	164	105	230	98	191	134	250	50	278	97	127	60	246	54	169	38	83	14	121	25	298	17	333	17	256	28	399	21	202	15	446	59	65	46	79	54	115	208	109	101	150	130	196	70
YDR365C	0	0	0	0	0	0	0	0	0	0	0	0	0	0	0	0	0	0	0	0	0	0	0	0	0	0	0	0	0	0	0	0	0	0	0	0	0	0	0	0	0	0	0	0	0	0	0	0	0
YDR368W	286	254	176	410	121	206	177	405	159	341	199	470	222	731	304	470	246	570	75	470	68	279	46	278	57	438	38	522	44	530	63	831	44	416	32	843	160	212	136	212	152	390	491	243	288	407	317	482	187
YDR371W	456	383	306	568	151	344	257	523	199	487	298	704	42	0	77	0	55	0	114	556	95	524	57	376	71	774	32	779	69	495	82	758	63	422	39	762	215	234	165	241	189	374	458	217	270	285	305	292	297
YDR382W	138	57	103	77	49	51	187	200	156	179	180	262	87	247	121	140	77	90	140	228	48	205	33	209	32	49	19	54	24	21	40	289	29	168	15	322	87	50	70	62	87	103	348	95	181	143	201	157	91
YDR384C	464	399	270	605	146	321	459	988	369	1053	481	1292	266	820	426	468	317	523	311	1028	183	766	97	683	92	497	65	462	57	375	82	1021	63	563	49	1114	247	284	232	271	219	555	678	314	380	537	464	554	313
YDR387C	50	31	32	58	14	29	97	170	78	158	114	263	85	476	123	220	96	372	89	383	55	395	21	268	9	49	1	57	4	33	8	147	13	70	3	117	31	61	32	49	24	76	63	19	36	36	41	44	80
YDR390C	186	163	124	231	74	131	140	229	97	226	150	313	76	333	135	183	103	186	61	142	46	92	37	59	18	159	17	71	12	72	27	343	18	178	20	329	83	67	61	74	72	115	216	102	119	150	142	153	78
YDR399W	364	338	184	466	129	279	207	405	173	459	229	583	165	556	257	248	166	322	146	666	77	766	55	794	46	220	36	327	31	174	44	688	55	350	26	710	155	205	122	201	115	286	480	241	303	352	366	392	199
YDR408C	163	162	78	226	57	112	65	118	55	134	80	165	41	113	93	72	54	78	41	29	23	37	16	6	17	71	17	55	14	45	35	445	22	206	14	439	78	116	70	106	83	182	300	145	172	205	186	223	120
YDR419W	326	318	215	423	115	270	221	484	192	480	272	576	313	1662	475	958	331	986	315	1436	64	1055	48	999	61	860	48	771	52	724	65	656	50	375	37	728	211	246	181	266	161	409	512	232	302	383	374	439	185
YDR429C	1	0	0	0	0	0	17	9	23	17	20	5	2	0	1	0	1	0	17	0	4	0	4	0	2	0	0	0	0	0	0	0	0	0	0	0	1	0	0	0	0	0	6	0	1	1	1	0	0
YDR447C	197	122	122	200	61	104	178	288	139	271	158	299	91	41	156	43	124	43	219	350	59	326	43	345	41	88	18	162	21	105	45	444	27	224	24	401	139	168	135	187	110	288	270	128	180	174	215	215	133
YDR453C	0	1	1	5	1	4	2	11	2	9	8	14	3	22	11	21	11	16	20	29	3	13	0	24	1	3	0	5	0	12	1	7	1	11	0	12	1	12	3	4	1	7	2	1	2	2	4	1	1
YDR454C	47	23	34	38	14	17	52	91	51	78	54	98	7	0	9	0	9	0	81	305	22	219	4	178	10	42	5	74	2	62	18	183	7	79	9	212	26	28	17	23	25	27	55	21	37	44	44	48	20
YDR462W	23	9	13	17	6	16	112	155	89	187	105	231	3	0	2	0	0	0	47	188	60	214	27	183	1	3	2	12	0	8	3	51	4	27	1	55	7	10	5	6	9	16	18	2	10	10	15	10	30
YDR466W	225	155	137	201	51	140	137	187	105	218	145	235	30	8	38	5	26	0	97	387	52	275	29	317	34	210	20	217	20	251	52	462	36	244	24	420	120	145	111	217	110	309	304	113	155	168	182	196	99
YDR470C	10	16	8	16	10	6	93	143	81	155	83	223	18	85	39	9	27	31	46	79	51	77	18	43	2	26	2	3	3	11	5	12	2	6	2	25	3	10	19	5	6	21	19	1	15	6	8	6	3
YDR473C	190	155	115	224	56	149	119	276	104	252	150	343	187	1060	245	413	171	522	55	220	39	144	32	158	34	364	29	261	21	299	31	475	27	240	24	436	86	109	75	100	73	182	241	111	147	192	160	221	87
YDR478W	266	298	196	426	97	232	230	408	230	444	212	593	31	0	47	0	37	0	164	615	67	402	45	542	42	419	27	393	39	232	63	786	52	418	42	838	150	212	124	218	139	396	364	190	225	341	263	388	124
YDR486C	325	255	200	357	116	228	292	466	254	478	311	756	396	1907	576	1164	419	1065	254	839	122	834	58	947	56	419	50	444	49	338	66	1050	52	555	35	1056	241	331	174	290	174	581	627	267	331	393	397	464	295
YDR490C	162	144	116	261	50	113	80	109	77	99	77	155	85	449	133	203	73	303	45	339	27	151	17	217	27	499	17	524	17	404	23	187	22	98	4	186	89	89	70	90	81	152	199	77	126	133	165	180	41
YDR494W	205	140	136	190	72	103	123	162	112	179	137	214	98	634	193	231	126	283	65	220	58	160	39	233	29	174	16	127	27	168	28	354	31	177	13	352	130	110	101	139	83	205	319	130	188	220	189	217	88
YDR511W	164	102	100	162	69	112	109	179	112	179	109	283	101	492	174	233	169	381	71	486	45	302	34	345	34	318	26	362	21	168	35	432	25	235	16	414	120	131	102	145	111	279	319	101	171	194	223	212	131
YDR529C	55	80	50	161	31	84	86	156	91	163	105	235	132	667	230	233	131	373	41	212	26	147	19	139	14	210	8	335	9	202	12	260	13	168	10	322	75	141	65	147	46	262	93	42	47	49	74	58	32
YEL002C	17	9	21	31	12	13	69	124	77	151	84	155	4	0	9	0	6	0	92	299	27	245	20	261	12	78	3	29	1	57	10	93	8	51	7	78	25	29	11	32	28	59	40	24	38	22	29	38	10
YEL015W	191	103	119	145	88	106	54	75	55	91	69	96	43	51	98	42	60	60	33	8	26	37	21	12	20	38	14	36	15	30	30	145	16	59	13	161	88	49	67	63	80	81	234	54	164	78	154	103	47
YEL017C-A	34	19	27	52	7	16	105	282	123	318	115	460	0	0	3	0	6	0	130	2362	45	1597	24	1629	9	127	4	166	5	108	7	56	3	25	1	66	11	19	12	27	7	62	20	13	6	14	15	24	5
YEL042W	186	147	117	231	72	109	155	294	151	279	169	330	103	591	205	301	121	357	102	332	68	230	34	235	26	184	18	176	15	177	42	294	34	176	18	305	97	81	72	59	69	121	230	75	135	121	169	112	88
YEL054C	0	0	0	0	0	0	0	0	0	0	0	0	0	0	0	0	0	0	0	0	0	0	0	0	0	0	0	0	0	0	0	0	0	0	0	0	0	0	0	0	0	0	0	0	0	0	0	0	0
YER003C	241	246	128	359	80	194	150	269	134	276	177	348	34	0	45	0	35	0	73	531	66	494	25	452	31	262	35	238	25	218	44	476	27	259	24	498	107	141	105	137	108	247	323	141	181	205	239	226	145
YER005W	169	164	137	246	81	142	115	236	104	194	117	269	24	0	31	0	39	0	55	317	41	248	30	291	31	163	31	288	29	136	33	491	31	249	20	480	117	86	89	80	88	157	338	142	199	230	255	263	118
YER007W_1	246	197	155	334	87	162	128	270	116	332	159	371	22	1	55	0	23	0	80	359	57	246	21	281	52	327	21	422	29	359	34	413	26	210	25	424	102	102	84	121	89	204	358	144	224	246	252	236	141
YER029C	0	0	0	0	0	0	0	0	0	0	0	0	0	0	0	0	0	0	0	0	0	0	0	0	0	0	0	0	0	0	0	0	0	0	0	0	0	0	0	0	0	0	0	0	0	0	0	0	0
YER044C-A	68	59	63	107	31	69	153	315	147	329	183	449	7	0	13	0	14	0	59	298	51	212	33	231	18	115	9	201	13	160	13	109	6	73	5	134	37	45	26	58	38	68	66	30	33	50	48	56	17
YER049W	5	0	5	1	0	0	153	280	127	282	145	331	77	406	98	128	74	175	120	394	59	276	35	211	2	9	3	20	3	6	2	15	0	11	1	12	9	9	7	10	18	16	13	2	7	3	10	7	4
YER053C-A	166	135	88	205	64	113	86	178	89	177	100	252	96	483	173	252	103	374	138	358	31	262	19	246	11	138	3	112	12	157	15	323	25	165	15	378	107	179	85	233	72	373	212	97	111	136	150	160	100
YER061C	245	199	135	293	71	180	103	244	100	280	127	375	83	356	132	159	90	248	62	342	38	280	26	321	33	225	21	275	30	237	43	523	42	305	25	585	125	147	92	147	96	248	340	125	184	229	214	286	197
YER073W	265	176	149	299	90	172	197	238	135	295	188	369	215	1332	389	474	271	635	167	545	63	458	48	456	35	282	19	284	31	205	36	453	28	252	26	478	128	147	109	158	106	212	384	191	243	274	273	315	118
YER101C	155	155	87	210	71	118	53	106	45	134	70	190	108	240	112	138	65	200	71	205	19	138	10	219	17	115	6	35	13	47	23	300	19	141	27	345	50	95	54	90	47	183	157	76	96	70	91	112	31
YER112W	260	252	183	391	94	225	245	416	199	456	240	559	129	613	227	343	138	426	327	1695	105	1426	62	1385	44	377	22	243	22	360	59	939	38	447	22	859	166	267	131	311	115	449	349	187	198	298	250	401	183
YER119C	0	0	0	0	0	0	0	0	0	0	0	0	0	0	0	0	0	0	0	0	0	0	0	0	0	0	0	0	0	0	0	0	0	0	0	0	0	0	0	0	0	0	0	0	0	0	0	0	0
YER129W	76	25	35	45	25	30	72	104	81	120	75	118	99	307	144	203	92	269	34	60	28	73	13	87	16	66	9	63	4	70	23	144	12	70	9	127	74	25	51	43	60	42	149	36	93	53	111	74	55
YER137C	152	102	80	166	39	110	48	101	67	66	66	107	231	1363	360	696	199	740	48	76	24	47	13	41	31	105	10	182	23	108	33	362	22	212	13	349	71	101	76	106	68	196	117	68	76	80	59	113	68
YER144C	0	0	0	0	0	0	0	0	0	0	0	0	0	0	0	0	0	0	0	0	0	0	0	0	0	0	0	0	0	0	0	0	0	0	0	0	0	0	0	0	0	0	0	0	0	0	0	0	0
YER170W	0	0	0	0	0	0	0	0	0	0	0	0	0	0	0	0	0	0	0	0	0	0	0	0	0	0	0	0	0	0	0	0	0	0	0	0	0	0	0	0	0	0	0	0	0	0	0	0	0
YFL027C	179	180	99	231	51	164	53	78	72	94	105	112	54	423	111	204	50	179	59	479	21	340	16	366	18	182	7	138	7	223	31	315	26	154	13	453	57	30	60	82	29	120	135	46	85	63	106	124	47
YFL030W	154	109	108	174	55	111	169	284	174	333	158	387	109	437	188	273	114	255	103	703	58	572	41	446	35	157	20	163	20	136	45	517	34	338	16	555	123	73	95	114	79	142	269	115	154	200	169	221	110
YFL034C-A	255	189	144	285	71	175	255	525	228	513	258	742	181	611	254	188	198	275	130	418	87	236	44	331	38	104	25	114	30	156	42	685	43	348	31	701	143	172	127	132	92	270	332	146	173	252	237	278	124
YFL034W	18	1	23	1	6	1	73	96	71	80	68	122	13	0	19	0	6	0	15	49	26	100	13	101	5	37	8	31	5	42	16	57	2	36	5	71	41	17	26	18	31	37	114	14	59	28	59	25	40
YFR003C	254	240	180	355	90	220	180	344	180	404	167	569	160	1040	231	381	168	575	104	885	49	627	31	562	38	494	30	401	30	416	73	824	42	393	28	896	163	166	123	167	148	310	393	197	222	248	254	331	198
YFR006W	101	56	62	85	43	48	242	392	190	357	256	488	16	13	25	7	21	23	123	745	93	579	48	528	17	154	13	84	13	174	19	295	11	131	10	250	59	75	53	59	58	97	97	28	57	71	65	54	44
YFR011C	152	128	80	221	59	110	129	356	136	333	167	479	170	1246	282	613	203	686	78	441	56	373	32	404	25	434	20	507	20	414	33	494	26	273	19	529	90	47	70	58	92	111	217	98	110	122	143	165	43
YFR015C	190	94	138	124	57	83	80	190	103	163	111	241	302	1464	478	666	359	890	109	412	27	393	17	270	50	385	16	331	24	327	47	411	32	223	32	514	139	208	136	193	114	358	309	102	177	127	198	211	147
YFR016C	220	116	119	174	73	105	75	96	61	100	89	110	34	27	59	15	48	41	62	307	29	210	16	154	30	136	23	172	26	173	57	364	46	178	26	369	140	138	124	112	103	148	355	73	219	112	222	142	122
YFR025C	185	131	85	213	51	106	92	194	77	171	105	217	124	699	219	392	156	501	56	302	37	222	16	151	39	306	18	305	22	361	37	406	20	225	13	353	104	114	99	147	74	214	276	119	148	202	161	220	77
YFR030W	200	95	113	130	68	85	69	108	52	109	69	156	33	0	39	0	26	0	21	158	27	62	17	97	28	253	19	302	26	224	39	321	27	158	19	287	134	143	114	149	119	228	263	61	151	102	163	138	83
YFR035C	404	365	265	554	136	319	143	191	136	174	133	264	238	869	389	400	213	549	104	133	36	107	26	143	64	659	29	642	36	418	83	784	51	421	30	763	264	427	239	512	209	714	186	67	110	112	103	141	242
YFR041C	0	0	0	0	0	0	0	0	0	0	0	0	0	0	0	0	0	0	0	0	0	0	0	0	0	0	0	0	0	0	0	0	0	0	0	0	0	0	0	0	0	0	0	0	0	0	0	0	0
YFR043C	270	193	160	337	68	209	152	270	127	236	167	343	344	2344	557	1123	401	1279	182	840	64	598	42	721	69	905	51	1190	30	1088	56	887	66	509	35	920	208	346	174	442	188	669	409	240	265	331	304	418	117
YFR055W	243	172	137	282	85	178	117	255	121	255	136	312	215	1063	300	553	224	610	86	439	50	456	41	444	34	203	24	135	22	170	65	651	40	365	32	643	125	130	116	104	102	214	431	198	247	359	316	355	125
YGL018C	190	197	121	324	71	243	115	189	111	266	140	294	17	0	25	0	31	0	69	566	58	380	38	275	30	236	18	236	14	216	41	512	28	254	32	514	57	92	71	98	54	169	314	164	172	265	182	290	56
YGL028C	141	72	99	134	57	91	95	173	80	132	90	210	179	1360	287	746	189	785	63	714	37	595	29	499	44	545	21	597	25	526	39	413	34	204	24	409	115	147	73	162	96	250	269	116	169	196	175	196	79
YGL040C	186	168	129	242	70	151	116	192	85	268	124	338	147	727	234	286	164	401	107	244	31	236	20	236	27	262	23	402	21	272	24	394	30	227	16	468	121	219	122	282	113	430	285	141	127	189	193	246	102
YGL084C	172	102	114	145	57	77	140	335	152	278	181	400	90	209	151	129	101	118	95	230	44	151	35	155	22	162	14	305	20	167	38	412	24	182	27	397	97	97	88	104	74	174	225	67	123	88	132	104	157
YGL092W	36	17	25	30	11	16	22	39	25	13	28	37	8	11	12	0	4	0	11	17	7	15	9	21	11	21	1	2	5	8	1	17	2	4	1	17	9	5	19	11	13	28	69	9	40	16	35	20	3
YGL116W	62	55	30	76	17	47	23	32	18	43	23	40	28	103	35	59	42	77	9	44	10	81	4	41	9	43	7	7	6	26	7	71	7	55	5	85	24	29	28	32	28	42	81	24	29	40	59	47	21
YGL120C	115	33	74	56	30	24	151	237	102	210	147	306	16	0	32	0	23	0	81	266	50	174	26	184	32	140	24	313	19	179	13	121	12	35	11	111	92	142	83	165	92	264	134	34	80	47	76	63	41
YGL133W	68	23	52	30	6	11	53	88	49	92	58	98	11	0	9	0	14	0	39	296	14	305	15	222	26	205	15	209	16	225	21	134	18	70	11	148	51	27	54	34	35	82	167	38	96	48	126	53	22
YGL139W	216	139	122	273	80	121	128	199	83	223	132	258	104	322	163	169	94	177	70	430	40	364	31	393	32	161	26	174	23	133	42	442	39	246	32	428	114	122	95	101	88	184	289	92	193	138	201	170	105
YGL142C	54	49	27	64	18	47	55	74	39	49	56	89	28	7	36	3	23	15	98	141	16	111	8	118	4	52	6	34	6	35	8	140	17	82	12	146	23	23	27	36	21	66	54	32	39	36	50	47	28
YGL145W_1	230	152	131	234	73	155	62	91	56	77	55	106	200	778	282	344	185	438	0	87	18	75	6	84	60	845	19	914	31	874	23	303	28	176	9	291	110	121	103	108	77	164	241	63	158	81	153	126	50
YGL154C	42	30	25	36	19	19	25	33	26	26	27	56	41	221	79	136	54	155	13	16	8	24	5	15	7	91	6	113	2	74	2	36	0	25	1	50	35	81	33	64	24	130	28	9	20	18	24	38	11
YGL170C	241	209	163	299	86	172	154	310	135	282	163	364	41	0	40	0	33	0	74	358	59	252	28	340	32	237	15	159	17	91	40	405	32	228	19	393	141	168	100	178	116	290	298	157	194	184	237	277	159
YGL202W_1	49	12	22	56	16	28	135	264	137	289	184	376	8	2	5	0	11	0	112	162	46	137	23	154	5	16	6	43	4	30	7	73	11	35	7	82	35	50	36	60	34	95	38	15	19	14	28	26	10
YGL205W	194	112	112	158	66	108	108	201	99	193	139	247	126	924	193	304	144	492	52	637	61	565	25	370	40	839	39	745	36	670	30	371	32	188	12	370	124	91	86	83	81	147	342	108	161	172	186	206	146
YGL225W	84	62	57	98	41	62	80	170	91	166	108	223	10	0	19	0	16	0	90	326	34	236	24	293	11	101	14	118	12	73	26	205	12	99	15	231	75	102	55	83	64	180	165	36	87	57	103	83	37
YGL230C	112	127	71	186	35	126	186	420	169	378	179	623	9	0	14	0	7	0	226	1382	66	1122	35	1024	18	355	9	222	16	194	20	236	9	101	3	180	44	64	28	75	43	127	58	27	39	52	52	58	39
YGL231C	186	114	122	238	57	140	209	555	178	547	239	759	206	1049	346	532	253	747	230	468	68	343	46	393	33	603	24	698	24	425	30	398	26	189	21	364	85	91	72	131	64	179	242	128	128	189	162	250	61
YGL236C	75	37	55	64	33	31	38	60	41	67	38	80	115	202	136	148	110	195	19	65	14	36	4	48	23	69	23	91	13	68	10	271	13	117	12	223	90	102	86	101	90	150	315	113	148	156	175	166	114
YGL241W	263	85	141	138	94	70	192	289	180	325	165	398	139	545	248	308	174	348	162	511	68	270	46	315	46	193	25	286	24	200	63	423	51	207	29	407	166	97	122	86	127	157	420	101	216	131	239	184	88
YGR001C	120	60	79	105	33	43	134	193	121	211	136	307	98	14796	162	5879	76	7384	169	22856	34	22980	19	27273	32	11765	13	14078	13	11463	15	275	10	146	7	340	101	84	68	93	61	191	196	104	81	88	118	202	29
YGR007W	196	142	107	259	64	127	136	246	137	208	134	330	115	502	165	274	153	332	128	477	51	447	35	418	26	156	18	145	21	182	28	319	21	196	19	347	84	90	59	89	74	193	237	112	136	166	151	182	55
YGR015C	129	155	75	255	23	149	25	47	19	47	20	57	96	490	126	147	97	232	0	44	11	34	5	38	13	57	3	82	7	104	13	177	11	88	7	166	30	48	28	79	26	102	163	78	88	157	101	182	68
YGR021W	125	104	93	187	42	118	179	320	155	338	175	445	229	1022	312	535	228	664	162	323	72	215	18	359	32	239	18	221	33	217	37	441	28	222	13	422	99	113	89	127	98	210	318	126	170	233	188	216	107
YGR026W	138	112	102	158	60	111	105	223	123	238	117	260	87	93	126	47	105	70	58	280	44	191	31	287	32	246	15	230	18	185	25	317	20	158	14	296	77	117	99	100	82	244	216	91	144	141	192	183	184
YGR027C	55	18	34	33	13	23	128	203	121	233	163	300	9	0	4	0	7	0	140	81	39	113	23	94	4	11	1	9	8	14	10	64	7	25	2	60	17	23	24	15	15	32	44	11	17	23	19	18	11
YGR035C	140	173	87	269	44	151	89	137	63	162	77	186	15	0	21	0	15	0	89	380	32	286	16	220	29	357	14	333	15	139	24	274	15	141	12	341	53	53	50	78	57	78	185	105	89	136	94	186	186
YGR040W	184	234	144	349	84	213	124	275	123	368	141	444	325	2043	485	964	332	1140	104	490	54	481	29	288	51	730	18	983	35	525	18	553	27	268	26	471	116	173	85	182	104	364	294	177	171	218	196	248	77
YGR053C	99	117	80	191	42	113	75	115	59	102	68	115	22	98	50	50	24	47	31	117	20	113	21	127	12	147	14	101	15	103	14	236	4	136	11	234	52	85	44	96	43	161	159	73	88	110	103	121	71
YGR054W	26	9	24	13	18	12	34	51	35	43	37	63	32	58	32	16	27	41	33	40	10	18	4	11	14	41	5	45	10	33	25	181	6	119	11	185	40	30	36	49	25	72	78	31	59	62	55	80	22
YGR060W	85	30	63	47	27	22	98	129	102	135	126	144	35	16	42	8	31	8	45	67	42	29	14	31	13	35	10	59	9	45	19	216	13	133	11	199	60	64	57	72	64	155	128	46	78	115	97	123	68
YGR062C_1	164	167	126	228	55	147	107	161	92	158	86	224	242	752	329	362	304	513	49	158	30	98	30	129	17	198	18	275	23	179	27	455	25	236	16	487	85	168	100	158	88	251	311	127	165	202	203	226	73
YGR066C	153	121	96	229	60	121	167	385	176	398	218	484	132	790	194	347	121	528	151	1060	102	742	61	752	37	270	20	202	21	259	50	565	50	310	19	485	108	139	92	154	71	248	315	168	191	292	190	268	159
YGR071C	53	48	37	55	22	33	65	98	60	104	57	163	23	114	60	37	33	51	0	47	21	25	12	25	6	91	8	129	6	58	13	94	4	33	3	86	19	40	22	36	27	48	34	7	22	13	27	20	26
YGR075C	57	21	42	36	18	17	130	152	117	149	118	197	53	356	94	218	78	157	62	223	47	140	34	80	13	94	9	57	10	84	8	69	12	48	1	57	54	53	52	41	58	81	88	17	47	26	69	31	37
YGR078C	54	62	30	117	20	67	76	187	66	181	83	280	3	0	5	0	7	0	47	934	27	603	26	696	4	38	3	73	1	55	3	57	5	39	1	74	15	46	26	61	18	89	13	13	9	13	4	12	13
YGR089W	130	83	92	130	36	87	108	149	111	145	84	188	145	464	206	256	138	317	45	363	38	285	21	255	26	253	14	231	21	231	29	268	21	158	13	315	97	106	60	134	85	146	208	88	111	117	172	123	84
YGR103W	248	172	184	240	79	142	199	336	173	306	210	416	29	0	56	0	41	0	160	563	82	471	50	419	37	281	22	254	27	263	56	587	43	285	29	545	177	166	138	175	99	295	366	128	220	180	212	214	172
YGR110W	216	199	150	302	72	189	193	335	209	322	204	424	195	1132	360	532	237	663	131	602	85	446	35	321	41	297	23	277	15	210	43	436	35	223	21	400	110	106	101	163	100	236	292	113	188	222	187	215	148
YGR112W	163	156	111	214	62	157	89	168	77	127	94	196	152	547	215	268	157	342	88	334	29	310	28	231	23	227	26	260	18	250	26	390	21	216	17	380	104	174	74	142	69	225	249	131	176	203	160	241	67
YGR130C	47	32	43	40	16	27	34	69	20	90	31	122	21	0	14	0	15	0	21	216	15	205	8	208	14	131	10	136	5	94	20	188	7	103	5	254	51	30	36	23	22	39	129	55	69	79	65	88	42
YGR131W	189	164	109	213	72	139	193	483	162	455	210	562	174	922	270	424	158	537	210	985	81	750	53	900	32	333	18	361	24	237	35	564	30	290	20	586	90	94	78	111	71	197	214	130	150	206	161	217	186
YGR143W	103	26	65	45	42	22	114	218	90	215	133	236	151	1058	230	577	181	582	46	586	38	436	24	359	36	600	15	514	28	596	42	496	30	228	16	454	121	148	101	147	92	276	301	161	158	216	185	240	83
YGR149W	47	49	25	79	14	36	83	147	60	135	91	191	39	143	44	55	49	92	71	51	29	40	14	10	5	28	3	64	7	16	1	62	4	27	4	40	17	22	26	27	18	52	45	17	14	35	31	27	26
YGR154C	273	242	154	384	84	260	113	247	95	207	104	321	186	925	256	435	169	513	68	435	47	440	12	455	37	408	17	395	18	342	39	616	33	325	20	574	93	114	96	150	75	216	268	129	166	205	177	255	128
YGR165W	40	17	47	45	16	19	92	170	66	172	89	201	42	200	51	95	36	88	54	278	27	303	20	268	16	31	5	52	4	22	8	108	9	67	11	156	33	44	20	38	28	68	58	19	46	33	42	35	30
YGR166W	254	226	129	325	82	188	114	225	115	207	131	302	142	847	231	236	179	359	59	398	37	376	36	409	32	255	29	238	27	160	37	399	29	211	18	432	154	136	112	154	100	227	388	156	206	245	247	307	104
YGR183C	277	314	168	509	112	307	126	300	100	337	125	405	124	643	137	226	127	291	213	457	47	499	24	483	40	632	34	505	27	393	44	719	29	403	27	714	122	134	86	142	99	242	339	189	189	292	222	308	169
YGR206W	210	174	142	252	64	154	179	426	160	397	198	594	21	0	45	0	30	0	180	1061	70	966	33	962	43	448	23	460	22	322	34	458	25	229	21	440	115	131	104	159	106	301	319	145	172	197	193	234	161
YGR212W	184	175	102	257	57	163	114	178	86	204	91	228	33	0	43	0	31	0	65	227	33	142	27	106	43	524	22	388	18	321	28	449	39	216	22	339	132	137	85	130	84	254	299	107	182	164	209	206	235
YGR215W	367	337	200	564	112	259	273	451	238	462	274	701	422	2634	585	1294	384	1392	321	1620	70	1130	40	1019	33	359	16	540	27	398	36	594	41	246	25	643	144	159	131	264	84	429	341	182	171	257	214	337	122
YGR234W	250	191	129	270	72	193	242	478	215	506	248	665	289	1194	470	727	294	802	138	659	80	607	44	519	47	320	22	328	32	243	72	913	43	427	29	861	159	183	141	221	147	266	349	145	211	250	259	313	184
YGR247W	496	448	283	661	156	386	327	637	256	594	296	856	307	1572	515	865	326	1106	223	1100	140	1032	71	918	76	921	46	1189	62	809	78	1014	57	568	33	1135	258	309	220	307	206	504	752	344	377	513	459	640	275
YGR254W	231	202	183	361	78	204	125	202	123	194	168	280	166	810	288	365	163	527	80	442	44	285	48	406	42	310	39	301	20	237	50	579	27	310	26	637	140	192	124	196	134	333	443	210	247	360	305	456	189
YGR257C	84	74	66	134	31	74	87	127	65	135	97	196	16	0	26	1	15	0	103	248	45	215	25	249	14	132	11	182	10	108	17	382	22	182	14	343	46	66	42	44	66	102	148	66	90	107	100	134	155
YGR261C	259	138	163	249	99	143	193	191	129	190	146	238	268	1262	484	625	321	751	86	331	54	236	33	297	49	183	21	300	20	142	43	431	41	252	34	464	125	73	103	63	104	121	402	108	198	167	252	198	98
YGR266W	0	0	0	0	0	0	0	0	0	0	0	0	0	0	0	0	0	0	0	0	0	0	0	0	0	0	0	0	0	0	0	0	0	0	0	0	0	0	0	0	0	0	0	0	0	0	0	0	0
YGR267C	254	212	155	334	95	195	237	441	183	437	273	531	209	1216	337	511	231	804	127	1005	98	820	57	672	54	469	27	444	31	402	58	782	42	403	30	748	144	141	142	166	126	229	424	212	259	327	269	409	195
YGR270W	70	39	67	24	22	16	47	20	52	34	59	32	83	395	161	152	85	193	44	11	22	11	5	13	11	15	8	15	14	17	24	70	18	35	9	53	61	28	50	41	65	60	171	21	89	32	128	49	50
YGR277C	134	137	69	213	40	153	91	214	101	216	107	279	121	536	201	294	128	419	110	781	42	711	22	735	9	381	7	234	11	212	16	285	11	130	7	187	56	80	42	60	35	98	105	68	69	96	66	113	61
YGR278W	6	0	1	0	0	0	5	10	3	9	6	10	0	0	1	0	1	0	0	0	2	0	0	0	3	0	2	0	2	0	1	8	0	0	0	12	4	0	3	0	2	0	18	4	8	13	7	17	5
YGR280C	0	0	0	0	0	0	0	0	0	0	0	0	0	0	0	0	0	0	0	0	0	0	0	0	0	0	0	0	0	0	0	0	0	0	0	0	0	0	0	0	0	0	0	0	0	0	0	0	0
YGR281W	0	0	0	0	0	0	0	0	0	0	0	0	0	0	0	0	0	0	0	0	0	0	0	0	0	0	0	0	0	0	0	0	0	0	0	0	0	0	0	0	0	0	0	0	0	0	0	0	0
YGR286C	453	363	289	559	156	334	349	658	354	650	362	826	145	489	188	290	135	339	367	1732	125	1648	72	1475	71	1093	37	921	52	824	93	1239	62	692	38	1340	232	324	200	360	194	566	563	302	335	443	386	515	301
YHL040C	188	145	116	209	49	148	78	177	70	139	93	200	180	927	366	550	203	531	61	280	33	213	16	201	24	195	16	230	20	219	28	306	13	183	11	402	88	41	57	35	52	70	218	72	106	119	164	149	79
YHL044W	4	0	2	0	1	0	173	447	173	483	214	557	3	0	3	0	0	0	189	1045	83	956	44	791	1	0	1	0	0	0	3	23	4	13	0	20	4	12	3	15	8	25	9	2	3	0	3	4	2
YHR006W	169	156	127	199	59	105	238	311	167	293	218	421	64	200	93	64	79	118	71	487	84	319	43	278	21	124	28	191	36	141	28	396	25	249	15	396	118	117	118	132	100	187	277	126	174	201	208	220	85
YHR033W	196	181	130	284	68	166	164	303	151	305	150	325	460	2888	669	1522	525	1757	117	872	66	802	29	713	43	507	21	508	24	455	45	607	35	308	20	549	128	197	100	223	110	331	353	147	186	242	214	264	130
YHR045W	185	151	121	249	54	135	154	250	113	263	135	293	17	0	36	0	32	1	131	262	49	314	34	198	29	204	19	219	24	105	27	429	32	238	14	459	79	126	95	121	75	209	209	100	125	145	139	194	91
YHR050W	48	42	40	60	17	32	38	90	38	86	56	96	89	354	126	159	112	222	34	52	14	57	16	41	19	63	8	83	5	83	16	176	10	113	10	209	63	58	43	71	56	123	196	72	90	103	147	137	33
YHR059W	781	724	536	1210	246	721	501	960	391	907	526	1268	656	2890	936	1742	639	1910	440	2990	244	2155	129	2144	104	1146	73	1212	67	925	154	2045	136	1094	76	2181	365	504	324	594	304	859	1110	537	631	915	716	968	548
YHR070W	203	144	125	230	72	121	144	358	126	293	161	379	222	1111	309	595	225	686	137	786	50	624	24	384	31	480	18	325	22	264	33	400	36	209	12	433	113	105	90	113	92	198	214	83	129	116	148	131	91
YHR089C	0	0	0	0	0	0	1	1	0	0	1	1	0	0	1	0	0	0	0	0	0	0	0	0	0	0	0	0	0	0	0	0	0	0	0	0	0	0	0	0	0	0	0	0	0	0	1	0	0
YHR100C	189	170	137	253	62	164	195	499	182	521	216	663	313	1601	502	950	296	1072	108	793	56	537	46	415	51	846	36	848	45	706	27	450	24	246	15	492	96	144	100	166	80	272	247	155	130	233	188	270	193
YHR141C	237	70	164	127	90	73	159	186	139	191	154	226	27	0	58	0	47	0	158	47	52	35	26	9	24	28	14	5	24	0	30	200	25	102	24	206	133	31	104	34	107	51	349	84	207	134	227	107	72
YHR152W	11	4	11	20	5	6	14	45	15	33	14	51	2	0	8	0	4	0	15	145	8	104	6	77	1	0	2	4	3	3	1	31	5	25	1	35	8	6	9	7	7	3	13	8	8	6	12	12	2
YHR154W	157	41	93	58	44	36	139	200	133	227	152	284	22	0	30	0	22	0	223	1146	69	915	43	1050	32	402	15	337	18	406	14	94	8	52	6	84	102	62	81	74	91	137	192	27	117	49	131	60	81
YHR158C	145	89	96	148	44	106	69	83	54	74	52	104	100	375	181	151	141	144	6	65	16	22	12	89	29	297	11	224	20	210	24	252	20	114	12	253	137	152	128	172	97	279	280	94	156	100	187	139	87
YHR172W	139	37	96	53	53	47	67	70	73	57	81	64	42	53	43	33	47	43	99	274	29	230	22	253	42	193	17	234	32	177	46	373	32	102	24	215	127	49	110	67	103	105	416	66	266	102	274	132	128
YHR182W	27	0	11	2	9	3	25	31	19	30	29	51	74	421	98	159	62	189	30	95	5	35	6	64	4	8	2	29	2	43	7	103	5	43	12	118	35	63	28	83	27	123	60	19	28	27	38	38	4
YHR183W	142	96	97	126	49	109	164	308	141	300	180	407	27	18	39	21	19	27	89	261	64	295	36	294	22	296	18	350	25	277	37	448	25	249	16	432	123	100	100	81	78	166	297	113	162	195	174	207	55
YHR185C	0	0	0	0	0	0	0	0	0	0	0	0	0	0	0	0	0	0	0	0	0	0	0	0	0	0	0	0	0	0	0	0	0	0	0	0	0	0	0	0	0	0	0	0	0	0	0	0	0
YHR186C	23	0	14	5	4	1	30	8	15	9	10	13	5	0	9	0	4	0	6	40	2	29	1	35	4	21	3	25	6	15	7	33	4	20	4	25	15	11	13	10	21	12	71	10	35	12	55	16	20
YHR191C	192	148	148	243	72	145	194	398	202	403	204	551	109	322	160	239	104	262	295	1297	94	677	48	871	37	344	22	306	45	348	50	646	24	358	32	712	142	181	151	167	128	290	436	240	263	399	307	417	168
YHR192W	329	320	180	492	132	307	170	300	169	308	178	479	320	1310	448	694	255	751	211	1104	51	819	41	946	27	383	23	444	25	439	43	692	40	291	24	830	150	161	127	229	101	448	389	198	177	219	243	343	53
YHR199C-A	376	336	226	518	154	300	127	278	124	351	175	463	279	1595	408	841	236	1033	116	484	40	300	17	360	42	455	26	534	28	302	51	633	30	339	18	679	126	140	117	171	103	334	324	182	161	220	233	303	158
YHR202W	25	28	17	40	8	9	35	76	29	69	48	83	2	0	4	0	0	0	39	88	14	60	9	37	3	0	1	0	0	0	0	4	0	1	0	11	3	0	1	0	5	0	22	4	7	7	9	7	0
YIL004C	298	209	171	324	94	198	357	816	314	682	412	1057	488	3006	765	1492	508	1829	229	1498	172	1369	88	1309	66	658	38	728	37	577	74	937	47	464	31	967	182	267	136	263	153	388	497	261	294	444	298	480	281
YIL007C	14	7	8	4	7	3	245	434	199	456	232	612	2	0	1	0	5	0	222	875	96	830	62	622	5	45	5	67	7	35	10	100	6	36	1	80	14	24	13	16	8	28	27	6	12	15	22	7	42
YIL008W	231	251	155	357	80	208	249	524	211	539	265	747	101	635	176	360	133	415	192	1787	102	1709	54	1472	66	1619	36	1627	35	1312	56	656	40	343	24	645	120	259	129	255	141	388	399	206	236	370	238	350	331
YIL022W	236	236	121	346	96	225	175	377	170	388	232	532	140	644	228	320	167	461	131	549	86	461	53	317	67	1004	23	723	33	652	48	674	39	371	24	664	150	87	89	108	104	176	400	158	223	267	279	325	186
YIL034C	208	183	135	312	63	181	122	288	113	311	108	317	24	2	45	0	29	0	83	429	33	484	27	348	37	198	19	244	21	281	30	331	26	184	8	328	126	215	85	214	93	421	252	111	136	189	164	226	139
YIL038C	45	17	38	27	6	25	52	63	46	72	52	97	12	0	22	0	5	0	55	11	18	20	10	3	12	74	4	89	10	79	10	156	10	86	8	159	53	57	52	71	33	105	107	22	52	36	79	51	26
YIL041W_1	21	0	15	0	16	0	9	11	10	8	11	13	38	129	65	60	34	90	4	40	4	9	3	17	9	53	10	109	11	43	9	128	7	87	8	158	39	23	24	22	22	54	106	38	63	72	72	88	9
YIL042C	0	0	0	0	0	0	0	0	0	0	0	0	0	0	0	0	0	0	0	0	0	0	0	0	0	0	0	0	0	0	0	0	0	0	0	0	0	0	0	0	0	0	0	0	0	0	0	0	0
YIL053W	116	98	64	100	36	89	51	100	39	108	71	172	76	177	103	99	74	120	31	142	17	52	8	219	15	101	12	189	6	85	20	211	16	97	14	237	65	71	43	94	47	147	129	62	56	71	89	95	60
YIL068C	25	13	17	25	5	7	4	10	5	9	4	13	3	0	8	0	1	0	3	0	2	0	1	0	1	12	3	21	5	27	7	82	7	31	1	56	7	10	7	12	6	19	58	25	37	44	43	48	15
YIL095W	178	6	129	21	80	9	172	57	139	52	209	72	40	0	67	0	28	1	126	1	35	3	31	0	17	0	16	0	16	0	28	37	25	26	11	29	124	18	111	18	134	28	303	11	193	14	221	23	59
YIL096C	305	224	155	354	106	143	151	252	154	293	140	432	301	1496	533	822	278	817	146	464	34	304	24	353	23	363	15	379	22	262	45	734	41	291	35	840	208	161	140	393	97	686	424	242	201	256	329	342	86
YIL110W	0	0	0	0	0	0	0	0	0	0	0	0	0	0	0	0	0	0	0	0	0	0	0	0	0	0	0	0	0	0	0	0	0	0	0	0	0	0	0	0	0	0	0	0	0	0	0	0	0
YIL116W	219	174	113	306	91	192	179	346	169	394	191	529	47	31	84	36	52	47	74	237	74	142	44	179	39	386	19	483	28	403	41	495	23	257	15	535	124	156	122	172	95	232	271	110	156	174	171	205	134
YIL123W	333	212	210	301	117	189	157	264	112	282	187	364	119	665	219	285	134	486	140	404	51	413	37	408	34	378	21	343	28	348	56	770	47	362	30	721	112	89	102	78	130	173	308	137	174	214	209	245	196
YIL126W	128	69	87	70	60	47	100	76	98	61	114	94	80	120	139	83	101	78	87	11	27	33	22	17	20	14	9	31	15	21	23	97	17	53	9	75	107	31	59	30	65	35	205	21	102	46	115	51	42
YIL128W	129	50	79	73	46	36	135	238	118	222	134	252	52	83	77	51	56	31	28	214	32	193	14	158	36	117	23	135	24	130	34	260	28	137	19	287	95	76	98	99	90	137	279	67	163	123	206	140	70
YIL138C	151	126	72	162	48	107	101	240	91	233	108	317	14	0	22	0	22	0	156	648	33	285	20	365	25	237	9	229	17	226	24	390	29	242	11	412	112	148	66	176	75	286	193	73	101	156	129	175	89
YIL146C	23	23	8	39	12	27	181	483	173	511	226	602	0	0	3	0	2	0	136	1452	90	1065	49	1082	2	0	0	0	0	0	1	0	1	0	2	0	10	19	11	12	9	19	6	1	5	2	4	4	3
YIL166C	0	0	0	0	0	0	0	0	0	0	0	0	0	0	0	0	0	0	0	0	0	0	0	0	0	0	0	0	0	0	0	0	0	0	0	0	0	0	0	0	0	0	0	0	0	0	0	0	0
YIR017C	118	114	83	170	42	120	164	293	142	252	177	426	99	455	170	257	110	287	175	944	55	773	41	732	31	257	13	283	21	338	25	376	18	198	9	415	74	109	60	132	65	228	184	66	112	164	131	162	49
YIR021W	185	157	129	232	50	137	110	207	100	236	115	261	205	1039	263	566	184	585	93	655	55	670	27	514	36	345	16	291	22	252	54	522	32	256	15	503	92	141	98	152	79	269	182	104	142	166	137	178	121
YIR025W	117	79	98	105	50	58	81	146	90	160	80	199	85	263	127	123	70	160	101	568	44	355	32	469	31	376	17	440	19	397	27	386	19	182	10	435	119	256	112	259	111	425	319	100	157	141	215	197	135
YIR042C	292	248	182	349	113	218	184	370	168	397	231	510	198	1074	335	501	218	711	132	535	68	479	38	417	30	210	28	350	28	211	47	636	25	369	22	619	132	136	108	168	101	261	373	173	223	324	272	323	162
YJL002C	325	288	183	435	120	250	217	414	186	412	258	541	94	323	173	136	82	159	165	381	84	304	57	340	54	547	27	488	35	397	57	559	31	275	32	537	184	278	158	280	139	478	364	144	247	200	286	264	93
YJL003W	275	245	185	363	106	207	212	450	193	483	231	691	356	1558	541	858	367	887	230	1053	102	743	57	804	52	930	32	928	30	829	65	859	41	423	22	772	249	440	198	507	192	790	478	208	259	347	302	329	164
YJL024C	215	248	132	333	75	213	164	346	176	342	194	462	144	882	203	418	157	301	77	383	90	239	43	283	33	411	21	482	23	433	48	698	44	361	23	780	120	179	123	190	89	302	309	191	204	283	223	288	128
YJL029C	62	30	4	48	38	14	9	7	16	7	14	7	31	64	48	167	12	26	14	9	5	22	0	1	1	31	0	26	1	85	2	60	5	21	9	199	25	1	13	39	2	97	39	19	16	3	36	40	1
YJL059W_1	66	60	63	78	31	50	84	181	66	155	86	219	16	0	21	0	25	0	100	174	27	160	18	158	23	477	14	600	13	433	17	263	16	120	13	274	93	167	82	188	81	320	203	83	111	125	146	153	102
YJL076W	109	49	51	55	37	26	55	57	43	48	46	58	80	368	143	147	93	176	0	52	19	26	8	15	12	69	17	61	8	46	27	174	10	72	4	143	55	34	39	42	41	45	124	35	84	48	106	79	40
YJL101C	151	48	104	82	55	50	83	98	85	89	92	120	79	260	122	131	94	97	76	92	19	45	29	81	28	81	11	84	16	118	24	271	26	155	17	319	97	88	77	83	88	144	233	91	163	132	144	142	113
YJL104W	350	428	256	616	128	407	235	391	189	400	254	502	83	321	167	164	117	237	279	974	109	891	66	668	44	286	24	445	36	472	59	622	37	316	29	656	150	183	172	221	157	342	451	177	298	315	316	378	153
YJL105W	161	127	116	167	46	95	99	175	78	192	103	239	179	660	279	413	177	417	10	291	53	284	18	252	31	389	22	474	23	335	34	432	27	197	17	364	136	276	159	259	129	454	301	130	169	160	224	223	69
YJL121C	102	43	48	63	26	39	53	65	49	76	38	124	35	141	77	99	42	87	35	123	10	81	9	72	14	123	7	106	6	125	15	183	13	92	9	261	56	28	53	87	26	155	174	80	80	72	113	138	30
YJL128C	99	79	77	113	42	62	103	73	90	77	103	105	25	86	44	27	32	33	7	32	34	31	15	28	20	16	9	35	10	19	9	249	11	111	4	243	68	16	22	16	53	24	107	35	59	39	63	53	30
YJL139C	174	118	116	180	57	102	125	242	105	192	163	295	104	407	130	150	104	257	30	118	35	128	25	39	34	359	30	314	23	319	37	418	15	208	15	374	136	199	95	188	91	283	283	124	143	213	185	215	140
YJL159W	61	9	40	14	15	7	86	93	91	84	115	176	2	0	7	0	5	0	14	6	24	14	9	9	4	0	2	0	4	0	11	82	12	43	4	68	32	19	26	33	28	68	46	15	20	10	29	18	6
YJL170C	195	119	125	209	69	132	141	308	139	312	149	398	139	513	185	165	147	324	241	577	79	465	41	519	40	383	24	509	36	329	33	519	22	283	13	484	129	268	106	239	114	480	417	157	241	282	215	327	86
YJL171C	0	0	0	0	0	0	0	0	0	0	0	0	0	0	0	0	0	0	0	0	0	0	0	0	0	0	0	0	0	0	0	0	0	0	0	0	0	0	0	0	0	0	0	0	0	0	0	0	0
YJL186W	125	88	60	119	41	78	60	142	67	117	78	185	35	26	57	3	33	16	84	206	26	89	9	154	25	312	10	301	13	215	16	123	17	52	8	84	75	67	54	87	63	126	178	59	122	121	126	101	44
YJL191W	165	169	128	224	68	137	138	256	117	255	140	338	84	235	122	53	103	147	118	329	53	179	38	230	25	115	21	106	21	55	39	529	35	280	17	494	119	215	101	226	96	304	312	125	164	226	196	257	68
YJL197W	2	0	2	0	1	0	5	6	5	2	6	6	1	0	0	0	1	0	0	0	1	1	2	0	0	0	1	0	0	0	1	0	0	0	1	0	5	0	1	0	0	0	16	2	5	3	9	5	2
YJL208C	142	123	71	206	41	111	119	215	129	241	141	288	13	5	18	2	17	9	112	690	49	559	32	681	24	194	8	380	20	246	25	313	15	139	5	290	87	153	66	170	64	255	149	60	77	90	96	81	32
YJR011C	12	0	8	0	3	2	64	89	53	114	63	143	3	0	10	0	6	0	19	280	20	204	10	267	10	141	3	146	3	110	4	148	9	68	8	89	21	29	10	23	17	47	40	11	25	36	14	22	32
YJR041C	149	88	85	125	55	72	99	159	77	142	101	228	74	211	92	125	59	118	105	462	34	291	16	402	12	71	8	74	7	52	28	251	26	108	16	275	77	32	48	47	59	95	178	50	119	68	113	78	26
YJR045C	95	14	52	15	32	15	118	4	136	10	128	8	40	3	55	0	27	1	39	3	30	1	31	0	21	0	9	0	15	0	19	59	14	21	7	39	74	6	49	9	54	10	230	19	130	33	164	36	46
YJR050W	255	255	164	407	88	233	171	381	150	374	154	559	210	1154	307	649	224	658	138	642	73	450	28	493	48	483	31	461	30	291	62	800	31	413	27	829	141	231	104	244	131	355	388	225	204	352	266	412	88
YJR055W	216	181	120	243	83	147	117	249	117	250	159	398	144	769	245	336	165	472	120	565	55	433	28	457	29	360	17	365	18	182	41	398	22	242	18	546	93	103	99	132	65	243	284	136	160	203	157	246	99
YJR060W	224	218	121	292	80	219	182	434	143	410	174	528	151	689	236	437	131	526	183	1030	73	849	52	846	34	547	17	522	22	492	42	519	29	256	20	621	138	152	112	155	107	315	298	202	195	283	227	344	117
YJR064W	0	0	0	0	0	0	0	0	0	0	0	0	0	0	0	0	0	0	0	0	0	0	0	0	0	0	0	0	0	0	0	0	0	0	0	0	0	0	0	0	0	0	0	0	0	0	0	0	0
YJR078W	206	171	136	246	84	154	94	168	98	167	120	273	117	717	177	360	117	357	87	684	56	618	28	618	43	558	31	617	28	515	47	602	41	339	32	652	150	187	111	223	129	295	388	175	263	283	278	325	94
YJR084W	1	0	1	0	0	0	0	0	0	2	1	2	1	0	2	0	1	0	0	0	0	0	0	0	2	2	0	14	4	18	1	9	0	3	0	9	2	0	0	0	2	0	17	10	8	17	10	11	0
YJR085C	101	85	50	119	35	79	50	100	66	117	60	145	78	439	150	358	80	310	46	373	30	239	10	343	26	300	12	275	20	278	17	293	17	192	5	308	66	107	59	130	47	182	174	107	119	182	133	182	108
YJR107W	20	19	10	44	8	18	9	10	5	10	3	15	0	0	1	0	0	0	0	64	4	42	3	64	0	0	0	0	0	0	2	24	1	9	1	20	10	18	4	31	8	26	5	0	5	5	3	8	0
YJR109C	102	29	53	37	29	25	46	41	61	93	65	102	18	0	33	0	16	0	64	18	21	22	6	43	25	251	16	317	13	383	27	273	21	124	16	245	98	76	98	96	74	161	204	49	107	71	154	78	91
YJR110W	240	162	149	239	86	125	203	363	172	348	231	469	23	15	51	2	48	18	197	844	107	915	55	594	39	519	27	517	34	391	48	456	37	218	30	457	158	129	126	148	123	216	350	132	215	205	258	237	102
YJR119C	12	3	7	4	2	0	49	84	37	97	42	144	4	0	1	0	3	0	70	247	17	283	6	221	4	25	3	24	3	31	3	38	4	17	2	36	13	6	8	6	5	9	14	3	7	5	5	12	6
YJR124C	219	178	143	232	80	143	181	264	136	274	150	328	287	2099	496	948	333	1081	45	354	66	377	37	250	35	424	25	473	37	388	46	526	19	281	22	455	123	123	98	125	101	206	343	157	181	239	226	254	202
YJR153W	137	95	89	149	54	100	114	237	102	211	126	307	29	38	59	5	28	30	62	226	28	208	33	179	27	413	24	454	14	440	35	382	13	178	19	404	107	114	79	124	81	200	256	111	148	130	189	160	119
YKL003C	223	151	137	207	74	117	230	469	213	508	261	689	283	1713	483	994	319	978	266	1389	101	1290	52	1072	71	805	29	764	45	651	53	770	56	365	17	806	197	265	141	261	128	486	487	259	256	416	310	504	273
YKL025C	105	54	71	93	37	56	99	185	75	169	80	258	71	323	122	152	64	274	98	251	36	91	22	123	26	153	11	114	23	119	25	285	21	142	17	273	83	75	79	94	59	134	193	75	105	100	126	133	101
YKL033W	56	37	29	65	16	28	50	78	52	70	54	88	3	0	8	0	2	0	0	27	12	33	11	12	10	29	3	29	3	13	9	77	8	40	9	54	27	10	23	15	18	25	58	12	33	10	33	20	17
YKL037W	134	120	103	191	53	105	112	199	93	256	115	259	239	1578	423	716	327	908	41	367	49	271	17	290	23	345	11	353	18	251	25	244	22	134	7	259	61	80	43	89	50	150	88	39	58	79	62	77	41
YKL049C_1	283	214	161	372	81	211	171	329	141	342	189	362	352	1939	492	857	372	1037	123	591	75	443	43	400	53	575	29	845	26	520	30	618	27	314	16	642	203	266	154	313	157	483	492	204	297	321	330	327	158
YKL050C	0	0	0	0	0	0	0	0	0	0	0	0	0	0	0	0	0	0	0	0	0	0	0	0	0	0	0	0	0	0	0	0	0	0	0	0	0	0	0	0	0	0	0	0	0	0	0	0	0
YKL056C	151	88	106	134	61	84	105	137	132	168	135	235	102	326	191	177	102	227	111	139	43	125	20	91	20	111	14	108	11	90	14	216	13	119	17	289	109	72	82	118	66	155	233	47	114	80	164	87	57
YKL072W	237	125	154	202	80	134	170	307	114	268	202	334	176	1039	279	519	182	534	211	515	62	377	50	213	36	168	17	154	22	207	43	433	43	233	23	390	133	121	108	112	107	169	335	109	212	166	222	194	119
YKL084W	331	388	220	601	118	382	225	427	216	439	226	510	347	2383	526	1018	409	1246	118	718	73	470	53	483	47	416	28	549	37	474	57	816	39	422	33	854	141	214	148	271	126	409	433	239	246	424	308	421	149
YKL087C	128	149	85	267	45	134	81	134	61	120	78	202	55	157	115	80	63	110	143	727	41	521	39	675	31	369	19	569	18	449	24	282	18	121	15	299	108	254	102	299	82	497	245	83	106	129	134	119	53
YKL093W	322	236	182	354	110	228	193	381	187	417	195	584	465	1765	646	917	500	1132	189	822	79	939	49	667	44	580	35	632	38	485	61	450	52	273	27	511	184	290	172	286	105	380	302	172	251	247	233	260	254
YKL101W	0	0	0	0	0	0	0	0	0	0	0	0	0	0	0	0	0	0	0	0	0	0	0	0	0	0	0	0	0	0	0	0	0	0	0	0	0	0	0	0	0	0	0	0	0	0	0	0	0
YKL107W	25	25	12	44	5	31	11	22	9	20	15	45	75	620	123	258	70	265	17	4	5	4	5	0	8	36	2	68	6	35	7	80	10	41	4	91	26	48	21	61	27	137	36	14	35	31	29	29	19
YKL135C	209	97	135	141	59	69	124	137	111	112	127	166	71	161	108	75	94	72	70	22	38	47	26	11	25	160	29	149	22	129	40	352	27	219	21	376	127	74	116	81	96	117	304	82	192	113	197	115	92
YKL138C	320	283	200	464	121	236	273	600	268	653	293	775	178	542	336	292	255	300	317	1240	139	1020	70	938	47	454	25	613	31	455	61	880	43	448	40	864	150	167	140	166	128	297	433	225	244	369	295	476	267
YKL142W	229	248	128	331	86	204	152	226	144	195	145	306	302	1314	486	615	277	608	160	443	69	415	44	374	43	381	23	539	21	348	42	454	30	232	13	456	135	202	131	203	105	306	307	146	183	222	203	267	174
YKL144C	162	93	110	174	50	87	192	367	203	447	196	618	232	1481	354	712	204	726	227	1491	47	999	30	1302	21	251	23	225	14	215	46	496	28	262	26	661	119	146	90	173	92	267	326	175	175	199	189	333	94
YKL157W_1	160	116	129	215	58	109	162	201	105	204	150	254	26	14	82	6	19	4	53	139	42	96	27	78	29	64	16	69	18	34	31	274	27	145	12	271	109	117	94	128	87	217	321	93	188	151	224	192	43
YKL157W_2	109	58	56	90	41	54	99	154	101	168	122	221	32	19	46	9	38	11	100	48	39	16	24	41	23	77	21	92	17	89	21	184	18	108	14	160	83	84	73	114	84	162	224	54	135	79	156	117	80
YKL165C	189	119	149	178	56	129	117	168	101	156	100	221	255	911	336	386	251	522	55	106	36	138	29	97	28	142	14	157	17	134	42	294	33	173	23	282	119	95	84	123	86	153	251	83	134	113	134	116	105
YKL170W	217	192	134	313	80	183	189	387	153	387	226	600	47	0	79	9	45	4	189	701	73	743	40	651	32	229	24	330	29	281	47	535	39	263	20	487	111	156	112	167	90	291	291	144	163	232	219	246	123
YKL174C	217	198	124	290	73	148	97	128	80	131	109	173	24	0	60	0	24	0	67	0	35	6	25	14	40	474	27	538	25	376	40	438	29	238	13	433	145	212	133	240	107	394	356	131	210	229	212	265	131
YKL182W	120	18	53	50	27	23	47	37	55	47	59	37	14	0	28	2	17	0	0	2	17	16	11	11	23	0	10	8	18	10	16	119	14	68	4	112	69	36	52	35	56	47	201	22	120	29	145	53	75
YKL214C	117	64	70	124	42	58	160	411	162	418	181	523	63	351	115	154	99	239	165	1163	81	991	45	795	40	391	23	403	26	271	38	470	29	268	13	513	118	178	106	175	88	290	306	182	170	262	200	319	58
YKL217W	0	0	0	0	0	0	0	0	0	0	0	0	0	0	0	0	0	0	0	0	0	0	0	0	0	0	0	0	0	0	0	0	0	0	0	0	0	0	0	0	0	0	0	0	0	0	0	0	0
YKR011C	253	186	164	284	77	142	123	193	90	208	101	258	66	181	117	126	77	199	9	147	44	119	29	78	31	312	23	507	27	337	37	397	34	270	14	407	143	253	122	235	112	366	376	179	220	307	282	399	183
YKR018C	46	28	46	84	21	30	29	62	27	56	33	75	108	747	155	338	138	507	8	12	6	3	7	2	8	105	5	182	7	89	7	88	6	73	6	101	34	31	21	39	22	52	73	20	37	31	40	26	7
YKR028W	0	0	0	0	0	0	0	0	0	0	0	0	0	0	0	0	0	0	0	0	0	0	0	0	0	0	0	0	0	0	0	0	0	0	0	0	0	0	0	0	0	0	0	0	0	0	0	0	0
YKR029C	102	53	65	107	43	63	112	218	91	196	112	223	12	0	23	0	12	0	73	181	43	176	23	161	19	143	19	209	10	149	17	224	14	103	9	216	65	62	51	67	60	113	131	44	69	80	101	107	38
YKR035W-A	96	49	84	87	32	56	117	234	132	258	147	311	93	398	121	199	79	266	67	340	31	229	29	359	26	491	11	503	23	407	28	345	20	201	12	459	125	205	85	240	101	356	185	104	92	133	120	189	109
YKR059W	141	57	95	109	67	55	97	98	81	99	72	128	25	4	32	0	32	0	36	71	25	44	13	64	21	6	12	14	18	7	18	124	17	76	10	130	98	44	80	43	77	68	267	81	140	115	209	168	58
YKR060W	139	149	110	206	54	135	136	169	112	199	123	264	100	347	136	177	87	213	81	718	45	603	35	585	42	664	18	743	23	578	30	453	23	238	17	442	145	201	96	227	109	388	336	130	176	191	225	267	172
YKR078W	188	134	83	215	76	173	146	261	149	263	176	354	135	567	195	185	117	346	87	435	68	389	28	436	27	204	10	204	16	151	29	419	19	214	26	387	73	79	55	91	65	134	200	98	101	155	158	184	170
YKR094C	222	112	174	199	94	117	167	287	147	268	201	367	107	149	183	104	139	94	115	58	36	29	37	28	43	154	23	156	24	90	51	497	31	198	24	352	176	131	127	144	120	282	416	110	234	232	273	206	93
YKR098C	160	113	93	148	40	90	122	257	108	224	132	305	33	135	68	124	42	76	49	463	47	519	27	388	33	185	17	190	26	204	17	186	13	89	10	150	57	45	54	55	55	64	117	47	87	67	102	92	126
YKR106W	271	218	139	325	76	195	121	129	72	160	98	202	186	390	345	219	191	273	110	353	45	274	22	320	41	510	24	404	32	517	49	512	28	261	19	522	182	271	148	286	139	498	368	106	213	151	248	204	146
YLL018C-A	275	333	163	450	89	325	135	279	121	318	168	428	40	139	79	57	38	64	169	1412	70	1336	50	1160	41	451	14	405	26	368	37	557	21	277	16	530	121	245	78	226	94	365	300	157	168	243	188	301	91
YLL025W	160	151	94	197	53	132	158	322	131	339	204	430	129	632	228	350	136	312	95	896	40	570	33	479	37	388	21	473	20	382	32	546	23	264	18	500	101	207	105	216	100	380	255	126	150	226	199	242	28
YLL031C	0	0	0	0	0	0	0	0	0	0	0	0	0	0	0	0	0	0	0	0	0	0	0	0	0	0	0	0	0	0	0	0	0	0	0	0	0	0	0	0	0	0	0	0	0	0	0	0	0
YLL040C	0	0	0	0	0	0	0	0	0	0	0	0	0	0	0	0	0	0	0	0	0	0	0	0	0	0	0	0	0	0	0	0	0	0	0	0	0	0	0	0	0	0	0	0	0	0	0	0	0
YLR007W	319	338	202	530	98	330	223	416	211	444	215	563	278	2056	484	845	275	1007	164	941	85	1093	55	782	79	1052	36	1331	45	1105	60	598	53	325	24	617	141	181	106	189	119	314	396	224	248	292	282	359	158
YLR008C	50	0	39	1	14	0	66	2	65	1	79	6	10	0	14	0	17	0	64	0	14	0	13	0	10	0	2	0	6	0	8	7	2	1	1	3	35	2	23	0	31	0	78	2	51	1	62	2	15
YLR014C	126	55	66	90	44	54	65	74	61	89	76	119	17	0	24	0	13	0	29	79	13	90	11	55	16	260	9	154	6	201	20	257	15	126	13	390	73	82	62	106	62	176	156	48	72	53	105	80	61
YLR017W	100	78	52	133	38	62	134	269	114	262	131	364	230	972	370	439	216	549	97	151	46	173	16	162	13	108	11	144	10	74	20	250	16	127	13	269	40	31	44	22	38	80	90	35	59	31	66	48	23
YLR032W	0	0	0	0	0	0	0	0	0	0	0	0	0	0	0	0	0	0	0	0	0	0	0	0	0	0	0	0	0	0	0	0	0	0	0	0	0	0	0	0	0	0	0	0	0	0	0	0	0
YLR044C	214	184	143	303	68	211	128	180	123	197	162	263	21	0	36	7	22	0	108	212	46	95	30	85	31	98	11	157	23	155	36	240	19	116	7	240	98	107	76	151	92	211	212	62	108	120	138	144	44
YLR046C	0	0	0	0	0	0	0	0	0	0	0	0	0	0	0	0	0	0	0	0	0	0	0	0	0	0	0	0	0	0	0	0	0	0	0	0	0	0	0	0	0	0	0	0	0	0	0	0	0
YLR060W	189	170	123	326	57	170	88	130	78	126	94	180	94	148	118	129	110	115	76	181	38	146	23	173	24	31	11	91	14	52	21	166	14	86	11	205	78	65	65	59	69	107	214	78	109	139	148	148	134
YLR071C	179	115	121	165	77	91	96	157	78	149	85	194	141	538	203	213	137	284	59	84	22	54	15	102	31	109	16	95	16	79	31	270	36	133	19	315	91	68	80	71	81	80	321	85	172	146	230	166	75
YLR084C_1	74	2	51	30	31	7	73	67	65	75	73	86	20	2	41	7	31	1	67	47	32	26	22	53	25	311	14	340	14	266	11	112	15	51	4	97	74	67	76	85	67	109	164	24	108	35	119	44	69
YLR108C	0	0	0	0	0	0	0	0	0	0	0	0	0	0	0	0	0	0	0	0	0	0	0	0	0	0	0	0	0	0	0	0	0	0	0	0	0	0	0	0	0	0	0	0	0	0	0	0	0
YLR116W	291	263	203	397	99	243	114	222	124	249	120	313	25	1	72	0	41	3	56	174	58	236	29	118	55	533	34	600	29	547	38	546	36	331	30	584	151	170	110	206	142	303	363	182	211	282	245	340	369
YLR119W	91	91	57	148	46	88	62	101	67	140	76	174	11	0	14	0	17	0	21	168	26	97	17	71	17	130	13	111	10	202	13	216	16	121	6	234	36	52	24	44	33	80	136	64	72	106	86	121	16
YLR120C	142	159	81	257	42	141	78	146	88	151	83	182	216	838	270	419	179	478	51	255	33	227	22	222	13	145	10	183	11	112	27	295	22	165	15	281	52	56	52	65	48	102	188	92	102	154	126	187	52
YLR133W	144	132	89	193	38	89	102	157	77	95	105	184	92	350	141	152	115	173	58	134	44	46	20	47	30	272	27	304	35	197	38	350	36	152	17	288	103	104	78	79	93	204	312	121	224	194	213	223	79
YLR138W	47	21	19	16	18	10	11	13	9	23	11	25	5	0	5	0	5	0	18	18	3	16	2	4	7	27	6	46	7	32	4	44	6	15	2	41	21	14	15	18	27	53	47	8	21	11	26	25	20
YLR143W	103	27	73	38	32	25	105	139	73	127	87	209	93	239	173	163	109	173	64	111	29	84	20	61	32	236	25	325	17	171	18	307	13	107	11	237	96	62	77	104	72	129	275	90	156	114	159	125	131
YLR151C	107	91	63	142	36	90	86	110	71	140	54	179	54	421	88	217	59	160	42	121	25	135	12	114	18	157	10	231	13	127	16	216	12	101	4	223	63	60	49	77	52	140	143	86	94	124	117	129	42
YLR154C	266	245	180	344	76	230	197	299	182	303	222	432	324	1487	496	687	310	691	115	276	59	305	38	204	33	318	25	284	28	276	52	695	38	348	25	723	144	94	78	133	96	231	394	201	193	226	289	322	77
YLR170C	71	62	47	110	27	80	60	106	33	91	44	151	7	0	12	0	13	1	76	375	22	201	17	214	6	60	7	71	11	30	7	112	6	58	6	120	52	80	50	101	26	125	73	31	56	62	51	74	15
YLR176C	0	0	0	0	0	0	0	0	0	0	0	0	0	0	0	0	0	0	0	0	0	0	0	0	0	0	0	0	0	0	0	0	0	0	0	0	0	0	0	0	0	0	0	0	0	0	0	0	0
YLR177W	52	45	36	78	21	51	13	11	21	26	14	41	31	201	54	137	30	112	0	0	4	1	2	0	16	203	12	251	7	153	8	80	2	39	4	49	20	12	14	6	21	3	53	24	31	42	47	50	5
YLR190W	312	355	187	581	127	317	154	292	142	271	154	377	34	0	59	0	36	0	90	581	66	442	42	634	54	906	25	1275	37	972	37	505	28	274	22	527	166	233	131	296	141	471	455	191	219	338	277	356	181
YLR195C	118	104	57	147	37	103	39	88	33	96	44	111	16	0	17	0	9	0	43	46	18	38	11	11	22	303	16	229	11	289	31	450	27	205	17	364	64	150	62	155	43	217	260	151	149	211	186	307	88
YLR201C	245	193	143	261	68	165	150	371	140	428	156	537	128	288	182	151	121	178	162	789	73	553	38	652	40	359	29	379	41	403	44	521	33	257	23	530	146	224	162	257	132	338	416	232	259	363	286	379	133
YLR206W	0	0	0	0	0	0	0	0	0	0	0	0	0	0	0	0	0	0	0	0	0	0	0	0	0	0	0	0	0	0	0	0	0	0	0	0	0	0	0	0	0	0	0	0	0	0	0	0	0
YLR207W	127	98	80	138	50	70	66	100	64	83	69	128	48	95	82	36	47	85	56	183	23	108	13	88	26	124	9	220	12	158	32	310	17	188	11	298	96	127	78	132	76	258	242	91	129	125	178	184	48
YLR209C	0	0	0	0	0	0	0	0	0	0	0	0	0	0	0	0	0	0	0	0	0	0	0	0	0	0	0	0	0	0	0	0	0	0	0	0	0	0	0	0	0	0	0	0	0	0	0	0	0
YLR234W	240	247	169	382	87	236	124	218	132	172	118	253	248	1230	361	522	250	581	106	641	42	627	33	533	47	533	29	615	34	391	47	487	32	293	30	522	129	161	119	147	123	250	330	166	218	184	228	264	141
YLR238W	42	20	33	34	20	20	148	316	142	337	155	519	6	0	7	0	3	0	155	221	44	122	28	177	9	53	6	46	9	37	9	147	12	55	8	165	19	25	16	34	16	56	50	30	32	29	38	56	14
YLR244C	3	0	2	0	0	0	2	6	0	4	0	10	1	0	0	0	0	0	19	0	0	0	1	0	0	0	1	0	0	0	0	0	0	0	0	0	1	0	3	0	2	0	1	2	1	1	3	0	0
YLR266C	42	27	27	44	19	23	35	84	29	81	48	125	51	389	89	124	47	158	0	30	12	15	5	42	4	110	6	179	10	119	15	140	6	77	7	168	35	36	46	28	32	49	102	47	69	54	81	53	50
YLR268W	306	309	198	508	103	301	136	238	140	246	147	336	624	2300	973	1066	661	1262	68	415	54	322	30	543	55	1134	35	1119	40	630	56	787	56	442	36	817	198	249	134	296	145	519	533	240	283	340	332	451	164
YLR271W	258	224	167	347	100	191	180	345	136	273	189	427	113	372	159	179	135	343	78	1053	67	898	42	574	42	421	16	348	22	229	39	474	32	250	19	475	125	165	117	225	131	367	328	171	188	245	210	275	92
YLR272C	0	0	0	0	0	0	0	0	0	0	0	0	0	0	0	0	0	0	0	0	0	0	0	0	0	0	0	0	0	0	0	0	0	0	0	0	0	0	0	0	0	0	0	0	0	0	0	0	0
YLR283W	111	81	64	116	37	55	120	224	95	250	119	272	10	0	26	0	10	0	39	273	39	199	23	239	19	185	17	249	12	179	24	326	26	188	11	403	56	152	69	142	51	200	122	85	82	108	86	137	68
YLR300W	285	291	169	433	93	240	199	342	154	337	184	475	328	2796	549	1642	345	1605	238	1234	60	989	35	1258	52	744	26	880	34	540	58	580	45	258	35	391	186	181	141	188	93	332	360	120	224	209	262	253	237
YLR304C	106	59	76	112	40	62	126	188	128	195	149	289	46	127	70	113	45	119	98	739	49	602	22	483	23	160	16	177	19	139	28	319	21	167	17	339	89	59	53	52	59	94	216	73	116	96	142	120	77
YLR306W	251	226	133	320	67	229	93	194	74	183	124	234	364	1836	560	804	388	1037	60	308	53	304	14	232	76	1747	31	2174	48	1710	50	607	38	293	16	612	120	165	111	173	113	327	398	174	267	309	272	344	80
YLR323C	285	225	176	379	77	249	195	356	154	323	239	431	270	1209	481	544	297	743	204	731	63	579	47	441	29	385	23	594	25	345	46	600	37	295	16	501	167	246	133	256	168	439	446	203	259	329	276	308	122
YLR325C	183	183	97	252	59	155	123	304	140	325	181	501	139	632	242	262	129	447	93	413	40	417	22	516	22	200	10	171	11	230	27	382	23	184	28	468	79	66	62	87	43	202	171	65	92	95	138	138	88
YLR336C	118	67	94	84	59	58	118	141	106	140	118	203	123	425	174	218	107	316	132	65	29	94	17	41	26	243	16	192	15	138	48	308	24	172	16	329	93	52	50	44	66	96	207	48	115	91	133	125	71
YLR342W	0	0	0	0	0	0	0	0	0	0	0	0	0	0	0	0	0	0	0	0	0	0	0	0	0	0	0	0	0	0	0	0	0	0	0	0	0	0	0	0	0	0	0	0	0	0	0	0	0
YLR348C	0	0	0	0	0	0	0	0	0	0	0	0	0	0	0	0	0	0	0	0	0	0	0	0	0	0	0	0	0	0	0	0	0	0	0	0	0	0	0	0	0	0	0	0	2	0	1	0	0
YLR354C	308	267	210	432	105	241	188	353	161	310	201	469	48	121	83	66	63	45	204	263	81	205	31	239	25	24	23	85	28	34	28	353	30	205	18	316	145	124	118	142	110	256	295	129	173	228	214	261	90
YLR385C	207	187	112	303	75	189	147	246	159	250	186	339	83	371	161	162	99	187	199	732	68	626	43	601	46	351	28	475	38	389	35	427	29	202	17	440	82	56	68	64	81	124	307	124	193	230	214	261	80
YLR389C	102	51	54	73	37	39	17	11	22	12	22	29	15	0	16	0	13	0	0	35	6	4	4	34	16	69	13	61	11	93	29	212	18	112	8	221	45	21	42	28	30	48	119	53	100	72	94	97	39
YLR397C	168	134	101	196	62	107	97	222	79	246	116	254	224	844	388	419	244	501	55	123	45	39	24	64	24	244	20	189	16	180	27	312	29	159	14	317	104	94	105	119	100	204	264	118	159	174	163	223	62
YLR403W	170	42	103	59	51	38	114	266	112	275	129	337	48	35	77	12	46	30	67	78	43	48	29	41	19	0	12	14	20	12	52	274	47	135	28	155	131	189	116	149	114	405	311	121	199	147	205	169	87
YLR423C	116	54	68	91	44	56	142	235	121	258	141	312	19	0	28	0	28	0	97	402	51	286	34	314	23	457	13	354	14	358	37	392	23	213	15	389	78	116	65	115	68	196	225	85	126	107	146	163	54
YLR425W	219	83	171	120	75	89	125	204	120	194	141	255	28	9	48	0	42	0	132	190	36	148	21	184	38	319	19	225	40	295	28	188	26	121	18	215	133	98	121	99	146	167	353	41	207	69	209	104	71
YLR438C-A	224	199	149	314	74	172	186	326	176	331	201	451	209	1000	305	515	193	683	109	567	61	424	49	423	35	249	30	499	28	189	52	610	31	294	22	634	149	206	136	273	120	462	322	198	171	331	201	305	115
YLR442C	179	146	119	202	74	121	67	117	50	150	56	148	57	235	110	134	77	197	61	296	19	243	18	257	19	117	12	112	8	90	31	322	18	147	14	298	65	84	53	106	56	139	206	71	137	96	153	151	76
YLR452C	177	128	119	210	92	129	161	334	138	323	182	417	264	1448	466	695	295	689	140	259	63	236	38	209	43	181	26	175	19	257	36	502	31	276	23	540	145	133	126	176	110	271	364	141	185	177	235	260	122
YLR453C	155	159	115	236	56	138	134	289	138	210	150	350	46	181	69	91	54	162	81	260	56	135	37	120	30	277	23	260	22	248	33	407	13	214	17	435	95	122	77	103	79	234	243	93	142	164	160	154	123
YLR456W	271	289	176	423	82	267	188	381	167	380	203	566	291	2005	452	920	262	1078	109	563	43	342	40	334	40	610	27	604	36	616	55	650	40	312	15	706	123	134	97	123	79	210	350	196	192	280	250	337	156
YLR459W	207	178	154	262	70	153	133	239	146	301	169	339	125	561	194	280	105	328	117	227	54	226	36	145	39	209	15	234	21	250	41	484	32	271	18	529	109	110	98	153	95	260	341	180	195	243	242	281	106
YLR461W	196	215	135	317	79	213	162	262	153	359	163	432	70	233	134	132	56	159	153	936	48	637	22	826	37	570	23	634	20	488	36	505	28	253	30	573	107	89	76	130	63	208	257	139	144	166	182	241	98
YML024W	136	67	66	98	35	56	83	150	66	157	91	214	102	253	168	116	104	114	53	85	19	106	11	56	27	131	21	274	19	71	13	253	19	110	9	299	160	231	127	279	107	468	223	61	79	76	177	119	62
YML041C	165	113	91	167	51	123	157	232	122	254	163	303	31	0	47	0	31	0	155	302	56	192	38	272	23	113	14	95	23	95	31	409	34	198	31	488	98	108	101	104	82	188	270	78	138	125	145	126	116
YML048W	140	45	86	84	36	50	73	128	71	163	86	191	130	478	188	179	129	270	80	274	29	227	18	230	32	427	21	470	19	337	16	233	18	141	12	257	89	109	93	130	89	214	240	78	138	134	178	159	105
YML050W	206	173	138	282	63	152	101	218	96	217	114	267	99	395	141	219	101	214	73	301	27	195	23	231	21	324	24	386	22	319	37	549	28	283	18	499	123	161	102	176	111	253	268	138	169	171	176	243	103
YML053C	159	71	121	110	65	70	142	346	141	366	184	481	26	5	44	0	41	0	172	131	54	134	29	201	45	97	28	99	24	70	45	439	28	198	21	336	136	142	109	154	137	299	298	126	218	211	197	234	78
YML063W	265	131	184	213	105	122	177	196	158	194	196	280	222	219	317	101	199	140	81	133	64	102	42	88	30	42	24	97	28	26	47	370	47	198	25	411	182	134	152	138	178	250	571	119	281	185	328	206	218
YML070W	435	336	243	597	138	328	176	289	173	324	182	381	296	1033	453	415	302	543	68	241	56	134	36	128	67	592	43	584	48	578	59	746	49	377	32	712	268	336	217	386	204	679	654	225	414	314	437	388	176
YML081C-A	205	150	164	210	69	182	216	450	200	419	234	611	135	790	238	409	161	532	83	754	103	708	56	632	51	398	26	431	29	376	41	604	29	316	34	608	149	195	113	233	103	357	332	183	203	285	242	329	93
YML081W	208	163	135	189	67	123	102	130	87	104	122	151	20	0	42	0	28	0	76	94	40	37	26	22	36	120	19	67	18	37	37	306	23	119	13	258	104	68	88	82	93	123	271	57	176	115	204	114	74
YML082W	55	50	32	94	23	47	81	142	56	142	78	186	3	0	4	0	3	0	90	233	20	215	17	223	5	103	3	161	4	73	5	58	3	36	3	61	14	7	17	5	25	11	35	13	27	17	28	17	11
YML096W	0	0	0	0	0	0	0	0	0	0	0	0	0	0	0	0	0	0	0	0	0	0	0	0	0	0	0	0	0	0	0	0	0	0	0	0	0	0	0	0	0	0	0	0	0	0	0	0	0
YML097C	63	29	33	29	28	23	94	182	89	158	105	245	15	0	26	0	15	0	121	417	40	180	21	195	14	162	8	170	12	146	5	73	3	28	7	66	53	35	36	43	57	74	100	33	55	37	68	44	19
YML098W	332	338	211	459	102	317	235	429	229	428	256	538	96	339	170	131	110	252	198	1192	92	943	76	810	59	527	30	565	40	450	56	811	44	397	36	710	190	327	193	353	168	554	554	261	303	430	351	453	119
YML104C	0	0	0	0	0	0	0	0	0	0	0	0	0	0	0	0	0	0	0	0	0	0	0	0	0	0	0	0	0	0	0	0	0	0	0	0	0	0	0	0	0	0	0	0	0	0	0	0	0
YML106W	57	40	35	55	14	47	182	336	175	303	212	444	9	0	7	0	5	0	53	118	56	123	49	98	1	15	5	27	3	62	6	45	4	20	2	29	19	3	17	11	17	8	26	8	19	9	24	15	10
YML115C	195	146	106	236	76	141	67	90	71	100	94	150	21	0	26	0	23	0	62	163	30	103	10	130	23	448	11	327	15	446	25	320	17	178	20	356	99	96	82	115	56	277	167	83	96	85	135	120	112
YML121W	436	503	279	691	127	456	213	442	171	460	211	648	340	1176	519	544	362	775	167	1058	93	827	37	942	52	544	49	614	52	549	78	928	39	488	37	936	210	345	164	317	172	594	573	288	335	496	374	534	145
YML130C	280	195	150	316	103	185	207	352	182	301	196	386	113	194	157	94	91	136	202	537	107	392	53	308	38	182	24	110	24	102	33	431	25	226	27	360	132	149	123	174	105	286	355	170	226	234	252	295	51
YMR017W	155	144	132	240	69	160	81	177	66	188	94	223	28	0	40	0	21	1	144	444	38	337	22	450	36	266	21	326	31	316	37	467	30	241	16	481	99	123	75	140	101	211	333	110	186	183	211	218	131
YMR026C	149	124	86	192	62	93	42	44	41	44	40	78	24	0	34	0	17	0	32	23	19	3	6	0	29	315	18	325	20	210	18	307	28	142	11	310	86	129	90	124	71	205	257	100	102	185	191	185	73
YMR031C	62	25	37	41	11	22	57	123	41	96	63	107	7	0	20	0	14	0	23	197	25	190	16	284	12	161	8	120	8	141	3	54	4	36	3	66	36	45	27	55	48	107	88	20	52	36	83	44	61
YMR040W	263	236	163	399	109	243	201	439	204	424	243	605	46	0	58	0	31	1	186	460	69	369	40	402	56	738	25	509	28	528	57	731	56	359	26	709	184	346	170	355	181	647	469	207	254	323	300	363	145
YMR041C	41	8	30	11	19	9	89	114	52	132	81	146	17	0	22	0	17	0	27	101	40	137	22	155	14	37	11	49	8	66	11	133	5	72	5	134	49	85	47	90	43	107	132	49	74	73	93	66	42
YMR063W	0	0	0	0	0	0	0	0	0	0	0	0	0	0	0	0	0	0	0	0	0	0	0	0	0	0	0	0	0	0	0	0	0	0	0	0	0	0	0	0	0	0	0	0	0	0	0	0	0
YMR073C	187	107	103	176	51	122	105	152	86	135	113	200	69	140	126	55	78	46	32	67	31	56	22	21	34	195	24	290	20	171	29	409	28	190	19	391	96	134	96	155	68	235	252	87	117	125	170	153	83
YMR088C	180	128	113	199	55	104	110	194	97	200	126	301	306	877	525	437	344	534	76	173	43	205	23	141	38	307	25	379	26	388	41	424	27	228	15	474	119	95	123	110	111	239	390	186	219	260	265	306	55
YMR102C	183	148	129	293	66	153	94	111	81	116	89	127	31	66	58	31	34	32	42	316	40	283	29	280	23	182	15	173	18	130	41	344	24	181	12	373	99	111	86	91	77	125	276	62	147	133	157	172	89
YMR108W	97	89	67	141	37	78	126	134	82	187	126	190	13	0	25	0	23	0	69	362	37	258	23	161	13	60	15	150	8	52	13	182	16	114	8	210	60	106	63	104	64	188	155	60	94	81	98	123	27
YMR114C	162	137	86	216	39	124	122	231	80	193	127	268	27	2	29	2	28	0	61	169	56	142	26	172	29	389	13	444	29	347	28	376	29	187	10	356	84	103	69	74	77	146	235	97	152	157	202	158	78
YMR116C	169	81	110	130	61	78	86	157	87	169	97	192	61	33	119	47	82	63	41	57	32	42	21	29	22	62	18	50	20	65	20	234	34	120	20	270	117	149	110	173	105	278	251	73	153	141	175	163	47
YMR119W	2	0	6	0	3	0	10	11	5	7	11	22	1	0	2	0	6	0	0	1	3	0	0	0	9	111	2	28	5	61	2	43	3	23	1	51	23	59	23	58	22	84	17	10	9	10	12	15	11
YMR132C	171	210	120	242	79	186	86	223	70	223	105	261	122	575	214	291	134	319	166	382	30	287	18	383	42	756	25	987	25	1066	34	458	30	250	18	455	119	191	91	218	83	297	224	131	133	228	200	223	224
YMR134W	341	358	241	537	106	333	296	566	215	520	279	741	262	1175	423	611	282	643	276	1065	90	1019	57	780	50	514	29	644	38	378	60	884	52	441	31	848	185	302	159	307	164	493	483	279	291	415	317	489	168
YMR143W_1	347	172	194	255	108	122	150	206	145	260	146	301	31	0	63	0	40	0	71	62	51	47	34	33	42	64	22	125	31	69	62	519	33	243	20	429	197	231	180	201	177	319	482	126	260	210	315	267	130
YMR168C	64	65	28	118	19	47	41	107	48	92	52	111	5	0	6	0	12	0	16	45	24	22	13	27	7	31	3	87	4	34	7	48	3	39	2	53	12	0	11	0	14	0	46	14	21	24	21	27	14
YMR175W	113	126	58	207	29	104	42	70	27	69	29	97	65	563	131	281	88	315	11	27	14	47	7	30	14	184	16	309	9	239	27	354	18	198	9	369	81	146	58	165	51	278	170	84	87	145	94	172	66
YMR176W	0	0	0	0	0	0	0	0	0	0	0	0	0	0	0	0	0	0	0	0	0	0	0	0	0	0	0	0	0	0	0	0	0	0	0	0	0	0	0	0	0	0	0	0	0	0	0	0	0
YMR177W	94	61	48	115	32	64	91	133	62	140	94	181	205	1586	325	690	238	841	86	665	37	581	24	536	12	110	11	128	10	245	12	160	14	96	13	143	45	14	24	21	33	17	86	29	49	53	69	41	86
YMR178W	209	147	110	218	55	136	191	386	174	369	191	511	143	699	225	364	152	376	159	993	78	707	44	716	38	243	20	291	30	217	34	559	39	307	22	569	108	97	92	125	117	186	354	160	198	246	240	312	141
YMR193W	225	178	128	312	77	178	233	462	209	438	257	686	137	790	231	285	140	441	187	671	62	562	51	398	33	226	11	269	25	198	41	660	30	365	25	645	149	209	126	256	125	332	329	146	169	185	219	291	120
YMR197C	398	409	230	630	141	368	224	518	214	537	238	701	278	2419	455	1205	317	1449	320	2184	95	1702	66	1899	60	1118	27	1297	39	862	49	738	43	377	26	647	213	269	177	324	167	571	458	230	271	369	295	509	264
YMR198W	235	163	133	251	89	126	99	252	95	254	112	338	102	835	140	430	143	476	116	852	43	741	34	654	26	270	12	255	17	187	55	449	31	210	30	438	109	201	108	171	85	346	260	110	167	173	191	193	96
YMR205C	0	0	0	0	0	0	0	0	0	0	0	0	0	0	0	0	0	0	0	0	0	0	0	0	0	0	0	0	0	0	0	0	0	0	0	0	0	0	0	0	0	0	0	0	0	0	0	0	0
YMR218C	191	140	142	238	64	133	99	110	69	104	74	126	16	0	18	0	15	1	33	241	25	274	20	191	25	135	12	104	24	199	36	291	30	147	22	277	69	39	44	43	48	64	140	40	73	61	105	88	89
YMR226C	77	67	73	83	33	60	16	51	16	36	19	48	17	0	30	0	12	0	28	122	9	40	8	25	19	96	12	198	12	175	18	205	15	122	9	256	64	104	53	76	56	225	203	70	104	89	111	116	24
YMR253C	55	59	48	101	23	55	24	27	36	30	28	54	23	54	25	11	23	17	0	56	12	50	3	59	14	119	8	213	11	176	11	174	8	73	6	143	48	30	28	51	33	98	88	42	46	66	83	90	20
YMR255W	0	0	0	0	0	0	0	0	0	0	0	0	0	0	0	0	0	0	0	0	0	0	0	0	0	0	0	0	0	0	0	0	0	0	0	0	0	0	0	0	0	0	0	0	0	0	0	0	0
YMR273C	47	11	36	17	17	13	55	68	36	56	53	63	131	1131	192	467	129	543	55	238	9	183	3	186	10	180	6	263	12	182	10	223	14	91	7	194	36	20	24	20	34	46	142	49	65	79	99	81	28
YMR279C	45	29	38	50	23	34	56	83	59	83	61	111	171	906	243	402	140	538	23	230	22	268	12	233	10	54	8	49	14	43	19	210	18	119	10	204	62	24	35	25	27	54	133	47	63	49	86	99	64
YMR291W	49	60	18	84	17	49	43	34	36	44	40	71	97	577	143	322	78	318	27	211	6	145	10	118	6	25	0	42	3	51	2	64	3	23	2	46	20	26	15	28	18	40	33	8	13	10	15	10	5
YMR298W	325	283	200	495	100	300	224	453	201	437	220	594	233	1490	360	739	243	815	327	2206	98	1774	61	1789	57	674	46	904	38	524	82	1066	57	572	44	1018	183	222	138	264	140	478	504	274	263	402	295	546	262
YMR299C	276	251	168	416	85	223	26	84	25	73	49	114	214	1403	303	576	193	714	27	196	11	148	10	186	84	668	36	731	32	811	100	1261	83	668	58	1238	178	388	171	390	166	665	535	275	332	432	386	499	283
YMR301C	214	141	140	240	71	125	132	256	104	247	137	317	248	902	339	632	278	607	80	376	51	336	34	276	51	302	21	341	25	347	63	655	53	378	31	552	134	193	137	174	109	255	424	155	174	263	260	249	122
YNL006W	200	123	151	197	57	109	143	230	132	243	167	312	209	1311	303	534	252	658	139	1237	75	1047	37	1520	32	101	16	126	26	124	41	576	30	291	27	494	130	117	115	125	106	199	397	216	291	324	289	352	108
YNL061W	4	3	9	5	11	1	35	56	22	65	37	85	0	0	5	0	2	0	60	15	9	23	9	14	1	9	4	19	1	3	2	57	0	23	4	49	12	12	6	14	6	22	18	6	10	9	16	11	10
YNL066W	198	141	142	188	76	104	112	194	97	187	125	237	165	793	224	313	193	408	66	288	51	236	26	168	35	170	17	175	27	172	35	594	41	283	16	537	134	188	116	215	102	498	307	135	149	211	193	258	153
YNL071W	129	73	23	99	58	46	8	9	20	12	23	13	23	79	62	176	22	54	6	44	4	34	3	21	7	194	1	306	1	315	5	143	5	38	9	312	34	4	6	14	5	56	101	56	34	27	52	86	2
YNL084C	185	135	81	212	47	131	78	110	81	110	94	177	43	226	76	160	40	137	63	333	23	219	14	260	27	409	8	598	9	373	21	205	13	126	17	373	93	53	71	141	25	271	157	80	66	87	109	156	52
YNL096C	3	0	0	0	2	0	137	227	107	268	143	335	2	0	1	0	2	0	62	98	46	77	34	60	3	0	1	0	0	0	1	3	0	2	0	2	7	6	4	2	4	7	9	6	8	8	5	9	2
YNL097C	86	55	55	81	21	43	47	55	27	44	29	58	33	102	51	36	23	55	34	105	15	80	8	94	12	82	6	116	11	143	16	97	8	72	3	145	38	16	29	20	25	32	103	55	55	64	69	84	55
YNL138W-A	40	55	32	81	19	35	62	78	58	52	85	95	12	0	14	0	9	0	56	130	33	144	12	151	9	106	6	92	11	50	16	132	6	75	7	134	35	44	27	31	36	62	105	45	48	86	67	83	88
YNL142W	140	80	74	111	40	66	135	193	114	213	137	290	255	861	434	413	284	431	116	189	40	142	18	123	39	428	21	359	27	287	35	347	22	206	18	340	113	146	81	167	81	281	301	98	159	165	203	181	194
YNL147W_1	0	0	0	0	0	0	0	0	0	0	0	0	0	0	0	0	0	0	0	0	0	0	0	0	0	0	0	0	0	0	0	0	0	0	0	0	0	0	0	0	0	0	0	0	0	0	0	0	0
YNL152W	233	204	138	323	93	199	150	332	154	319	170	511	157	812	269	472	204	528	79	401	60	370	23	272	17	53	16	122	23	38	40	624	31	309	25	584	132	147	119	136	106	285	327	182	175	247	222	309	240
YNL155W	157	130	59	186	37	106	76	148	80	138	99	200	266	1785	438	930	194	987	58	340	10	230	15	340	24	345	17	377	14	261	13	183	9	91	11	280	72	114	52	156	53	292	141	73	56	74	96	105	96
YNL160W	377	263	208	366	133	255	262	434	257	481	326	564	58	36	96	20	48	30	178	624	97	337	48	542	55	430	23	414	33	288	94	789	73	403	55	1012	206	135	174	211	138	381	559	237	254	264	389	413	236
YNL169C	89	68	69	122	46	72	39	68	38	68	34	81	54	234	92	145	65	110	50	61	9	94	13	66	16	170	11	236	14	176	24	358	16	181	20	351	64	52	67	68	29	89	190	83	107	131	101	156	48
YNL177C	32	15	20	17	9	18	30	74	27	84	36	93	5	0	15	0	2	0	54	420	26	399	14	353	15	25	2	50	5	20	11	121	7	48	9	121	27	22	16	36	16	49	35	15	19	17	20	24	53
YNL181W	344	297	168	437	128	247	195	413	162	413	200	616	428	2984	728	1331	361	1422	301	1752	49	1180	51	1873	34	608	16	696	24	594	39	586	33	297	24	792	155	222	139	267	139	492	362	186	165	181	264	301	202
YNL188W	253	182	149	337	81	181	153	274	147	284	153	363	163	733	291	357	184	458	103	360	50	375	27	225	38	305	24	283	27	231	47	507	35	316	33	583	145	147	113	133	107	216	353	171	202	210	239	303	110
YNL214W	34	34	18	38	11	21	46	56	44	62	48	75	8	0	11	0	5	0	33	82	18	106	13	113	8	52	8	43	3	57	9	76	5	39	0	64	25	17	18	33	18	36	38	20	25	32	24	17	11
YNL218W	126	100	70	153	42	94	121	225	109	179	131	279	162	1052	302	592	178	637	116	449	45	381	19	244	27	209	14	165	18	115	31	293	21	158	14	306	67	54	52	78	37	84	194	79	113	160	139	179	68
YNL219C	207	171	104	289	66	166	112	194	104	192	111	231	179	779	341	399	229	509	90	221	42	194	29	166	30	317	19	429	21	382	31	338	25	158	11	345	110	172	118	198	83	336	287	114	134	139	179	189	108
YNL224C	152	53	105	67	52	52	140	114	113	134	156	185	68	64	102	27	67	26	150	19	42	8	23	24	24	41	17	71	24	51	38	197	34	111	19	223	104	84	98	70	60	125	321	59	170	97	183	122	58
YNL230C	116	118	85	175	40	99	81	227	87	240	116	286	30	1	35	0	32	0	96	481	43	228	31	286	34	374	20	460	26	416	20	266	22	159	17	308	95	65	53	84	74	130	192	65	123	107	125	128	63
YNL245C	255	198	173	297	79	179	175	260	147	293	208	430	213	478	272	227	207	342	133	316	66	275	33	310	47	839	20	857	24	779	48	446	43	234	27	507	145	140	102	147	125	227	414	148	238	198	270	254	202
YNL280C	131	112	79	167	35	96	70	133	66	132	82	143	50	274	86	107	61	148	63	326	32	251	14	226	16	121	9	42	6	79	18	139	10	86	10	147	63	84	63	103	59	131	174	67	90	105	104	156	46
YNL287W	168	26	123	58	67	36	129	100	107	98	130	134	30	26	54	5	28	18	138	179	33	138	17	172	27	62	18	84	25	48	49	344	48	149	29	289	286	59	226	60	194	187	370	77	195	84	231	137	78
YNL293W	218	164	134	307	68	158	142	311	115	277	154	384	64	442	108	209	85	226	130	712	32	490	31	585	33	405	18	480	16	352	40	428	26	256	23	497	110	117	103	153	86	218	269	111	132	189	155	221	106
YNL295W	131	93	96	121	45	84	126	265	94	266	150	336	146	574	223	249	146	350	86	247	54	166	26	152	30	345	24	187	23	200	18	257	17	185	10	353	135	296	133	248	104	449	292	133	170	191	186	232	65
YNR004W	123	82	80	127	33	74	120	276	138	275	169	353	9	0	26	0	13	0	115	1232	65	1272	33	1158	34	734	17	826	39	739	28	476	18	238	16	427	63	67	62	74	46	128	195	96	103	161	132	195	201
YNR008W	210	133	136	213	83	128	111	182	132	163	131	243	93	417	181	261	127	274	76	354	32	235	29	177	30	115	16	229	13	249	36	377	20	239	12	475	103	89	77	73	85	134	287	138	171	204	182	217	96
YNR009W	0	0	0	0	0	0	0	0	0	0	0	0	0	0	0	0	0	0	0	0	0	0	0	0	0	0	0	0	0	0	0	0	0	0	0	0	0	0	0	0	0	0	0	0	0	0	0	0	0
YNR012W	0	0	0	0	0	0	0	0	0	0	0	0	0	0	0	0	0	0	0	0	0	0	0	0	0	0	0	0	0	0	0	0	0	0	0	0	0	0	0	0	0	0	0	0	0	0	0	0	0
YNR027W	209	224	129	351	77	231	105	213	115	218	139	292	26	0	29	0	20	0	58	208	35	242	29	192	37	364	18	440	17	311	26	351	24	196	12	355	109	209	94	238	89	371	179	86	97	146	121	160	78
YNR030W	336	238	233	408	116	224	259	489	223	478	279	608	259	1182	366	611	296	768	183	1032	111	786	68	852	59	427	31	379	36	351	78	718	48	418	41	729	177	245	178	236	188	454	591	286	341	476	351	447	290
YNR034W	26	15	20	12	6	10	16	17	13	10	18	15	7	0	10	0	9	0	9	32	3	25	4	4	3	56	5	46	6	64	2	81	7	28	3	73	16	7	33	9	22	17	87	20	32	27	50	44	16
YNR037C	202	212	149	343	77	238	165	315	109	311	138	460	18	0	29	0	29	1	221	1700	83	1241	37	1236	23	335	15	222	14	180	26	377	21	192	12	367	83	120	78	136	74	229	210	119	128	216	151	214	66
YNR039C	70	64	63	100	22	60	65	142	69	121	103	177	12	0	23	0	21	0	83	279	38	239	19	198	17	13	7	101	13	69	26	283	16	131	10	223	65	64	44	59	56	114	126	51	86	95	94	90	69
YNR046W	0	0	0	1	1	0	1	0	1	2	0	1	0	1	1	1	0	1	0	1	0	1	0	5	0	1	0	2	0	0	0	0	0	0	0	3	0	0	1	0	0	0	1	1	1	0	0	2	0
YNR047W	28	19	15	36	9	26	17	32	16	40	20	52	4	0	5	0	2	0	7	80	9	124	5	94	3	54	4	75	3	40	1	14	2	10	0	11	21	28	17	26	15	59	38	17	16	39	25	43	23
YNR048W	5	0	5	0	1	0	129	202	95	185	130	304	0	0	2	1	4	0	150	193	63	200	37	169	1	0	0	0	1	0	4	58	1	28	3	54	3	0	3	0	4	0	5	2	4	4	4	3	1
YNR058W	17	3	7	8	7	1	10	17	2	17	17	27	1	0	5	0	6	0	10	11	6	0	3	12	5	27	0	26	3	23	2	8	1	3	0	15	16	12	12	22	11	36	28	9	20	22	16	21	23
YNR075W	324	305	215	456	116	254	197	353	162	362	179	458	543	2479	823	1313	578	1478	127	958	71	784	51	586	59	428	39	430	34	341	64	739	43	406	31	746	158	230	137	243	125	386	440	195	248	307	318	420	208
YOL009C	332	359	234	556	128	332	153	311	136	304	150	388	335	1739	458	933	326	1030	96	560	61	556	37	524	91	1117	32	1225	33	1010	45	638	51	332	21	598	151	195	120	254	141	420	379	143	195	274	230	287	170
YOL027C	170	55	126	88	55	53	144	0	92	1	122	0	74	25	155	4	79	4	115	8	42	21	29	23	39	27	25	21	27	11	20	6	16	6	9	6	143	43	104	35	119	55	416	6	260	15	289	10	89
YOL029C	335	272	197	449	101	282	169	341	175	328	216	491	334	2299	486	1004	320	1116	160	328	70	309	43	349	54	424	31	438	32	323	66	937	49	537	39	966	184	246	168	261	153	412	494	234	261	350	297	439	265
YOL044W	228	167	95	271	78	169	85	153	78	180	94	283	42	69	56	33	30	44	59	508	24	459	10	618	15	270	13	364	22	379	36	351	29	194	14	559	137	130	88	219	55	311	229	94	97	88	163	173	86
YOL055C	83	25	41	37	25	18	40	94	41	117	60	160	57	3931	95	1874	56	2341	73	1822	19	1690	11	1647	39	28217	18	28790	18	24425	17	284	17	129	4	205	68	51	47	48	59	122	137	62	85	93	92	106	47
YOL057W	201	147	119	221	77	122	100	156	72	132	110	173	30	0	40	0	31	0	87	528	34	327	30	307	37	257	23	301	21	229	34	346	30	199	24	364	121	186	114	198	113	338	360	125	177	229	211	266	130
YOL075C	0	0	0	0	0	0	0	0	0	0	0	0	0	0	0	0	0	0	0	0	0	0	0	0	0	0	0	0	0	0	0	0	0	0	0	0	0	0	0	0	0	0	0	0	0	0	0	0	0
YOL094C	0	0	0	0	0	0	0	0	0	0	0	0	0	0	0	0	0	0	0	0	0	0	0	0	0	0	0	0	0	0	0	0	0	0	0	0	0	0	0	0	0	0	0	0	0	0	0	0	0
YOL096C	210	151	96	228	57	121	105	246	108	256	149	445	105	582	178	321	113	344	148	621	39	466	25	372	31	332	30	340	29	267	33	443	23	221	17	523	120	146	97	168	80	279	299	172	140	168	194	282	76
YOL113W	0	0	0	0	0	0	0	0	0	0	0	0	0	0	0	0	0	0	0	0	0	0	0	0	0	0	0	0	0	0	0	0	0	0	0	0	0	0	0	0	0	0	0	0	0	0	0	0	0
YOL162W	37	27	24	31	10	18	55	123	51	148	57	153	131	678	180	363	124	504	15	149	16	69	11	64	8	72	4	39	4	38	9	86	3	56	5	76	29	21	27	20	24	30	73	16	55	45	32	58	57
YOR014W	125	75	102	96	58	58	133	225	110	213	144	264	30	0	37	0	21	0	64	235	54	120	25	156	34	41	16	60	13	30	45	435	36	211	17	398	113	119	101	118	96	201	302	107	145	154	177	177	55
YOR026W_1	161	170	132	240	66	156	105	207	80	208	114	310	148	660	210	388	143	372	110	80	42	87	18	136	37	159	12	211	20	128	33	362	22	189	15	371	99	133	93	122	98	207	328	155	183	258	232	240	98
YOR045W	294	326	233	484	105	302	264	522	209	506	300	757	276	1179	373	544	264	728	156	832	79	653	52	578	36	350	30	455	35	376	64	997	44	612	48	1072	191	451	150	424	157	666	356	201	224	308	221	365	241
YOR057W	188	155	130	230	72	171	183	359	174	382	227	482	111	649	161	255	145	334	136	542	66	571	44	405	39	275	31	314	18	263	51	696	46	363	24	654	167	219	121	221	132	379	367	189	231	253	248	317	142
YOR077W	188	154	111	185	60	123	91	244	86	213	100	293	31	21	53	17	27	16	41	70	46	77	17	76	18	245	18	344	27	340	33	465	26	248	14	486	81	94	88	86	69	147	285	143	154	252	201	286	63
YOR089C	393	307	237	502	134	304	137	296	154	316	158	429	363	2102	488	1119	358	1268	78	682	79	763	42	429	63	547	33	712	39	632	57	814	53	391	31	795	189	213	141	241	152	374	481	217	299	377	308	450	210
YOR094W	203	230	159	332	78	189	234	393	216	429	251	569	224	1419	349	671	264	764	176	686	88	553	68	629	45	609	27	559	24	395	50	612	37	330	34	651	130	165	101	164	101	262	360	140	220	297	237	312	203
YOR103C	93	86	61	139	28	72	156	242	107	268	146	336	75	620	152	363	94	325	135	719	47	594	21	620	15	144	9	279	11	223	23	320	15	140	7	293	40	60	24	62	31	76	61	29	47	59	40	58	22
YOR144C	124	68	73	103	58	58	103	138	74	135	126	194	13	0	21	0	30	2	98	148	32	103	30	131	39	267	21	371	11	309	17	166	11	97	13	162	78	66	79	59	73	98	231	49	114	97	143	118	101
YOR150W	121	130	98	229	51	107	158	314	176	346	194	462	13	3	38	1	19	0	160	867	73	568	35	501	24	158	16	94	14	73	23	262	16	127	7	311	68	63	41	71	47	125	94	41	57	74	75	67	51
YOR152C	0	0	0	0	0	0	0	0	0	0	0	0	0	0	0	0	0	0	0	0	0	0	0	0	0	0	0	0	0	0	0	0	0	0	0	0	0	0	0	0	0	0	0	0	0	0	0	0	0
YOR167C	317	303	209	459	110	252	297	496	317	514	336	708	459	2177	609	1167	535	1407	241	868	127	909	82	630	48	512	32	619	44	469	59	744	54	404	29	733	183	155	144	182	159	261	554	165	286	300	348	350	157
YOR174W	219	174	113	254	66	153	55	112	60	104	85	187	114	591	202	218	101	255	24	165	11	82	8	171	26	243	7	371	22	138	29	333	30	189	14	472	116	149	83	194	82	283	295	136	155	142	214	237	92
YOR187W	0	0	0	0	0	0	0	0	2	1	2	2	0	0	0	0	0	0	18	15	0	15	0	3	0	0	0	0	0	0	0	0	0	0	0	0	2	0	0	0	0	0	0	0	0	0	2	0	0
YOR236W	43	51	32	53	16	39	72	133	65	119	75	155	6	5	18	0	12	0	96	95	28	32	7	49	8	42	4	65	4	39	15	134	8	108	4	174	38	48	37	54	36	96	75	41	36	72	51	92	88
YOR259C	60	16	21	32	21	11	41	59	32	40	34	67	32	139	96	65	61	88	52	65	10	74	10	133	11	1	10	20	4	8	18	177	10	81	10	213	46	43	27	80	32	70	125	50	82	85	85	89	39
YOR269W	176	131	106	192	51	132	82	117	64	98	90	164	21	0	30	0	25	0	82	258	23	143	20	145	21	180	10	115	22	175	16	266	16	121	15	262	76	169	75	92	67	187	269	122	135	161	183	175	53
YOR283W	97	119	44	180	31	105	56	80	46	112	55	122	9	0	15	0	9	0	44	259	28	229	15	115	7	23	6	71	4	68	12	157	14	108	12	203	28	74	36	61	26	127	105	64	54	94	71	133	15
YOR288C	117	55	74	109	39	52	221	489	221	497	215	660	253	838	404	430	266	510	108	616	78	433	45	281	63	702	37	792	27	668	32	423	18	225	19	413	140	222	102	235	115	391	210	59	108	128	124	128	171
YOR304W	72	80	67	116	33	58	125	260	123	219	150	342	18	0	19	0	13	0	167	657	75	504	44	443	24	611	14	714	18	641	10	167	14	84	6	216	39	58	34	51	41	77	87	38	66	43	56	67	41
YOR308C	160	160	127	241	70	168	99	149	112	163	114	187	124	726	208	240	121	361	13	171	42	182	20	241	41	378	11	355	19	251	26	378	19	201	13	360	83	94	71	66	63	118	215	68	130	98	149	134	97
YOR312C	46	45	21	60	16	31	16	19	9	8	15	33	0	0	1	0	1	0	0	0	5	0	2	6	1	1	4	13	2	6	3	13	3	8	2	17	9	2	9	5	9	6	20	8	19	18	12	18	2
YOR337W	183	117	101	188	79	98	125	146	108	148	126	157	75	242	135	117	90	137	83	103	28	110	27	114	27	103	24	46	17	66	43	288	27	140	17	254	109	104	86	96	84	192	292	96	179	156	230	147	82
YOR356W	66	38	32	69	21	38	30	13	27	14	25	16	8	0	20	0	11	0	33	66	4	47	8	22	4	15	4	25	4	25	7	136	4	76	3	196	34	32	15	33	11	65	67	27	48	36	53	50	16
YOR361C	185	41	105	63	69	24	96	50	76	48	120	70	29	0	51	0	21	0	54	1	42	6	19	0	20	6	22	27	18	8	22	106	18	59	22	126	86	9	54	20	67	37	282	58	159	59	187	64	68
YOR362C	303	300	167	484	99	260	202	378	178	387	200	564	187	1097	280	545	226	549	190	908	71	744	43	808	30	447	17	624	31	358	49	641	32	293	29	710	151	201	128	262	117	428	366	219	224	264	259	340	153
YOR363C	0	0	0	0	0	0	3	3	0	2	0	0	0	0	0	0	0	0	13	0	1	0	0	0	0	0	0	0	0	0	0	0	0	0	0	0	0	0	0	0	1	0	3	0	0	0	0	1	0
YPL021W	210	183	173	265	86	171	259	519	211	501	258	700	438	4220	649	1803	446	2444	373	2549	104	2406	67	2122	103	2746	52	3017	62	2386	68	943	68	550	40	990	199	334	185	331	146	571	516	301	265	462	344	476	270
YPL032C	428	67	267	92	144	41	178	132	160	120	189	127	20	3	35	1	29	0	137	53	65	48	31	95	40	110	23	79	23	64	81	140	74	82	44	125	239	107	174	111	218	254	341	43	212	71	226	68	75
YPL043W	195	78	125	153	62	66	82	133	103	145	73	177	135	472	241	253	143	273	89	251	26	188	17	125	26	106	16	194	16	109	39	256	27	141	28	259	105	96	90	92	89	119	323	102	170	133	230	164	56
YPL047W	355	351	215	538	116	366	126	223	100	238	116	246	48	65	71	21	40	25	45	275	35	239	29	166	59	601	27	789	39	452	68	967	37	526	36	995	176	257	153	301	144	428	481	280	271	423	300	476	224
YPL048W	0	0	0	0	0	0	0	0	0	0	0	0	0	0	0	0	0	0	0	0	0	0	0	0	0	0	0	0	0	0	0	0	0	0	0	0	0	0	0	0	0	0	0	0	0	0	0	0	0
YPL050C	213	203	156	295	102	226	102	212	90	231	103	265	311	1145	484	567	317	728	50	94	33	71	19	84	45	51	35	162	25	74	57	546	36	287	20	540	146	148	108	121	122	199	363	192	189	291	221	330	105
YPL053C	360	245	243	379	112	225	293	581	270	564	361	751	279	1230	422	513	293	572	328	1093	108	962	65	960	53	361	49	313	41	366	68	928	64	477	40	962	217	347	211	368	205	572	608	271	329	344	394	463	190
YPL069C	310	245	157	425	75	249	156	350	128	371	182	497	24	1	53	0	35	2	142	1379	64	1219	21	984	59	1284	30	1248	41	1050	47	897	48	496	29	994	156	368	143	392	138	616	336	169	184	322	222	378	117
YPL086C	252	196	145	347	79	183	121	295	99	240	120	390	172	844	284	412	213	397	146	269	31	309	21	297	55	727	33	978	31	780	67	663	32	367	41	672	131	126	123	143	79	252	326	124	211	194	206	243	112
YPL106C	131	23	92	39	33	27	72	35	69	40	89	67	37	31	63	17	43	22	23	8	28	12	16	0	16	2	10	5	6	0	16	144	29	54	9	121	68	17	44	17	58	40	200	28	90	77	111	64	37
YPL108W	278	228	186	370	83	232	217	478	181	456	233	610	242	1279	339	606	241	874	256	732	93	629	55	512	57	603	29	778	43	597	41	601	33	302	20	546	151	254	123	277	110	418	418	145	195	272	222	351	295
YPL116W	237	134	126	211	73	115	114	224	98	220	113	244	107	274	152	117	111	140	82	283	28	170	25	201	43	161	25	185	20	157	51	414	50	188	21	363	114	131	111	136	107	210	259	110	138	158	182	192	97
YPL126W	172	124	126	185	51	105	121	252	95	235	157	333	91	211	128	85	102	125	151	325	39	265	25	273	43	326	39	148	17	343	45	521	46	293	43	515	146	204	141	219	110	357	305	103	167	158	222	211	105
YPL127C	392	104	207	213	121	131	315	543	265	551	329	714	324	1643	520	874	323	1061	289	1902	157	1304	97	1499	78	497	47	674	60	441	99	678	73	372	45	608	231	161	206	130	197	284	539	177	317	288	329	299	226
YPL129W	0	0	0	0	0	0	0	0	0	0	0	0	0	0	0	0	0	0	0	0	0	0	0	0	0	0	0	0	0	0	0	0	0	0	0	0	0	0	0	0	0	0	0	0	0	0	0	0	0
YPL134C	140	136	88	202	53	129	73	152	81	167	105	194	17	1	30	0	20	0	82	564	38	383	20	367	30	205	11	263	23	285	30	343	18	196	12	357	112	166	97	224	70	330	213	93	114	194	151	185	114
YPL145C	167	18	101	19	51	10	209	64	163	56	182	81	54	38	86	11	62	8	165	21	48	36	37	11	35	19	23	45	23	9	51	186	31	59	20	106	141	23	111	34	115	54	332	32	172	52	226	69	67
YPL147W	173	119	100	220	71	131	81	151	74	154	110	189	59	248	68	127	59	169	76	188	42	151	17	188	20	44	12	43	19	46	28	173	19	95	11	150	69	40	55	33	61	73	207	76	121	118	136	124	78
YPL158C	268	245	162	320	88	218	122	252	108	268	159	329	68	329	146	143	99	222	44	99	41	59	29	124	55	219	21	215	24	235	45	360	29	194	20	371	90	80	94	113	75	144	251	82	161	151	176	165	68
YPL163C	10	0	5	0	3	0	31	42	22	50	47	75	0	0	7	0	2	0	0	54	12	29	12	61	0	11	2	13	2	0	5	25	0	12	1	28	14	28	16	27	10	38	25	9	16	24	11	20	6
YPL194W	273	236	203	342	93	179	137	266	93	267	145	333	30	0	47	0	40	0	41	483	41	320	36	225	48	271	30	300	30	247	66	521	31	292	20	547	158	246	140	253	127	420	422	179	254	290	310	339	139
YPL196W	175	148	121	204	56	135	196	397	157	402	210	571	257	1111	337	655	251	756	145	422	80	401	44	364	27	114	19	101	10	107	24	367	23	207	12	406	80	135	72	127	76	183	154	72	84	109	82	109	74
YPL202C	253	179	170	257	100	159	119	254	102	268	130	388	27	0	60	0	44	0	79	225	51	219	36	205	58	332	25	171	25	168	78	732	67	386	28	635	149	213	145	302	123	357	371	169	203	258	272	299	138
YPL207W	165	131	80	159	41	105	52	128	65	131	68	212	41	132	67	44	40	62	60	89	8	28	8	142	17	49	10	106	11	69	28	242	15	140	8	333	78	77	60	83	50	151	158	64	90	53	112	116	49
YPL216W	0	0	0	0	0	0	0	0	0	0	0	0	0	0	0	0	0	0	0	0	0	0	0	0	0	0	0	0	0	0	0	0	0	0	0	0	0	0	0	0	0	0	0	0	0	0	0	0	0
YPL218W	36	8	26	5	10	2	135	253	138	237	154	331	9	0	21	0	14	0	279	1877	134	1773	65	1693	9	80	9	90	7	100	7	57	3	21	2	12	50	55	29	44	34	111	63	11	45	23	36	22	79
YPL235W	241	195	137	273	71	161	118	191	114	201	127	305	24	0	36	3	18	1	105	176	25	91	17	68	18	171	10	140	11	197	18	190	18	125	12	283	72	54	72	55	68	89	194	74	94	99	133	140	67
YPL240C	621	578	424	944	197	589	433	516	332	653	455	857	428	2369	711	1147	477	1428	365	2160	192	1671	99	1882	107	1452	68	1433	71	1169	107	1436	74	747	57	1357	361	556	289	621	273	960	772	437	418	609	518	686	444
YPL247C	161	108	89	196	63	125	80	207	77	209	108	249	126	834	220	482	160	538	83	532	30	477	25	559	33	317	18	377	21	285	45	488	24	271	25	534	109	127	87	138	80	199	278	161	170	260	182	244	143
YPL270W	215	158	125	188	86	120	179	277	143	270	150	321	202	696	281	385	196	434	36	206	62	232	44	181	36	74	25	253	36	90	35	492	36	313	18	565	128	172	84	162	111	238	439	129	234	183	260	214	116
YPR004C	112	79	83	154	29	84	131	263	123	248	118	338	31	101	57	40	34	92	143	544	47	319	27	366	23	303	16	463	29	350	22	316	16	181	15	400	60	75	40	84	65	96	162	54	86	105	94	96	55
YPR008W	2	0	1	0	2	0	7	16	9	12	7	12	2	0	2	0	1	0	16	224	6	236	3	146	1	2	0	13	0	8	2	38	2	20	0	29	3	0	1	0	1	0	12	9	7	12	6	10	2
YPR011C	217	166	143	296	84	159	166	290	134	271	157	315	101	421	147	221	128	239	95	698	49	549	33	410	49	431	27	556	25	288	45	481	30	244	20	528	147	242	130	224	144	374	481	183	227	349	281	375	195
YPR013C	227	209	147	329	60	179	126	200	92	247	132	289	108	518	162	185	132	267	72	360	41	274	31	139	37	346	21	234	22	314	32	409	26	252	21	477	118	199	111	230	99	321	267	111	157	192	188	192	125
YPR021C	198	66	108	114	55	69	136	181	117	215	165	288	125	534	223	277	99	263	83	273	33	252	19	333	22	285	18	251	29	163	39	264	32	161	18	329	153	127	100	161	101	239	313	75	163	92	232	118	70
YPR031W	0	0	0	0	0	0	0	0	0	0	0	0	0	0	0	0	0	0	0	0	0	0	0	0	0	0	0	0	0	0	0	0	0	0	0	0	0	0	0	0	0	0	0	0	0	0	0	0	0
YPR065W	0	0	0	0	0	0	1	0	0	0	0	0	0	0	0	0	0	0	0	0	0	0	0	0	0	0	0	0	0	0	0	0	0	0	0	0	0	0	0	0	0	0	0	0	0	0	1	0	0
YPR078C	174	157	106	218	57	146	135	293	104	261	149	356	106	538	201	309	89	305	148	756	48	539	37	642	41	502	17	664	15	560	26	450	26	236	11	449	131	208	107	194	86	349	245	141	149	244	194	240	139
YPR083W	178	159	143	238	75	146	162	297	143	282	171	371	210	949	320	436	251	507	82	658	59	476	34	395	27	219	30	274	30	170	49	546	41	327	26	652	125	181	126	185	101	326	375	160	188	217	237	298	187
YPR086W	29	0	16	0	11	0	43	54	42	82	67	69	124	406	148	158	117	174	38	79	16	65	19	58	18	113	5	172	12	155	10	122	8	61	9	86	44	60	45	58	34	98	71	17	52	28	53	32	76
YPR100W	344	286	192	363	104	276	272	578	241	570	270	745	281	1733	389	914	294	860	180	1382	109	986	57	1224	35	505	25	481	34	444	61	885	40	511	29	1004	189	234	125	278	131	463	438	235	275	386	311	422	191
YPR119W	215	74	129	101	77	64	131	205	125	199	162	253	113	1119	193	500	136	593	215	1142	65	992	38	1033	26	37	12	61	14	10	39	364	28	153	19	294	119	63	100	56	98	116	323	72	198	131	223	137	108
YPR122W	136	51	116	64	48	28	87	113	89	111	118	191	82	414	144	153	69	210	100	160	28	198	13	235	25	297	17	340	15	251	30	183	32	77	23	214	99	44	76	36	74	79	241	49	115	51	135	82	81
YPR131C	239	179	158	302	79	172	229	522	200	554	277	707	251	621	393	259	254	387	150	94	87	76	52	87	49	203	25	154	21	129	53	553	32	280	24	547	174	169	151	196	134	288	334	145	149	196	210	267	116
YPR175W	229	197	195	266	98	188	166	285	148	322	177	368	76	224	130	113	85	204	58	293	74	173	43	151	41	404	27	367	30	293	58	609	50	310	22	623	161	198	149	211	138	299	446	174	229	272	304	332	204
YPR183W	3	0	2	0	1	0	2	5	1	4	2	4	0	0	0	0	1	0	0	0	0	0	1	0	0	0	0	0	0	0	0	1	0	0	0	1	1	10	3	6	2	12	2	1	2	0	2	0	0
YPR196W	11	7	8	21	7	8	16	27	6	19	8	21	5	0	2	0	3	0	0	0	1	0	4	0	5	33	2	25	2	30	7	49	4	46	0	66	10	8	12	13	10	21	28	13	10	25	12	29	1
YAL001C	95	24	84	54	32	38	133	147	106	157	120	185	20	1	43	0	37	0	18	12401	43	12247	27	11536	47	27679	21	31270	23	29423	23	250	21	103	9	236	97	95	77	79	93	128	280	83	128	144	169	149	44
YAL002W	114	34	66	49	39	34	153	297	124	270	173	345	109	339	179	176	109	249	72	163	53	137	40	88	25	76	10	115	21	151	14	191	16	119	10	192	92	70	92	71	74	126	138	31	71	44	81	64	156
YAL003W	161	65	131	84	65	57	212	206	180	201	241	276	72	82	96	50	67	60	86	67	72	29	53	40	34	8	20	0	17	4	27	145	39	77	14	149	102	18	92	30	78	34	342	63	182	80	228	104	74
YAL005C	109	9	63	10	46	9	71	35	70	22	86	28	32	14	46	2	39	10	131	45	36	53	18	75	18	2	17	0	18	7	19	35	13	16	11	28	92	9	64	4	56	8	192	13	131	22	146	29	39
YAL007C	227	213	132	318	73	193	196	414	188	457	247	555	165	580	306	313	169	365	263	569	70	368	37	353	41	537	23	512	28	442	48	598	33	304	31	668	124	169	107	122	106	279	266	124	138	155	189	225	165
YAL009W	497	512	292	772	153	513	233	471	214	450	255	608	303	1540	449	891	335	1068	235	1102	88	1047	56	1006	64	930	26	1071	44	711	63	925	59	451	33	873	211	257	184	249	159	413	603	295	310	519	352	519	402
YAL010C	289	161	185	295	99	172	240	513	231	524	262	714	393	2651	670	1120	436	1381	268	694	87	523	60	766	56	493	32	454	31	434	55	497	38	311	22	521	156	177	122	158	114	289	417	219	216	366	301	360	220
YAL011W	162	133	97	154	53	113	67	160	80	158	86	231	24	16	34	4	27	19	122	174	30	88	15	128	26	394	11	439	16	327	25	194	18	96	16	235	102	116	67	151	68	276	130	32	65	51	90	62	52
YAL015C	81	92	62	152	32	84	88	156	78	134	94	173	18	0	24	0	25	0	5	145	28	34	26	54	23	233	13	350	10	154	20	262	14	129	9	241	71	80	64	83	73	168	192	102	121	128	125	125	68
YAL016C-B	336	293	201	459	115	284	184	406	158	424	188	610	109	619	204	339	119	298	132	1363	56	1085	32	1299	56	761	21	1005	38	704	40	470	32	281	30	533	134	150	122	172	94	314	404	256	218	331	278	348	157
YAL016W	140	107	86	179	37	114	77	125	52	124	74	189	20	0	35	1	27	0	57	74	13	85	16	101	27	419	14	464	27	299	19	297	14	153	9	296	67	102	70	88	77	179	260	99	148	143	157	168	65
YAL017W	0	0	0	0	0	0	0	0	0	0	0	0	0	0	0	0	0	0	0	0	0	0	0	0	0	0	0	0	0	0	0	0	0	0	0	0	0	0	0	0	0	0	0	0	0	0	0	0	0
YAL018C	180	151	115	204	48	128	149	341	133	366	167	446	158	669	192	341	132	414	136	603	66	571	39	504	21	335	17	514	21	376	28	576	28	302	19	498	131	113	81	106	88	188	288	123	202	229	184	260	75
YAL020C	171	163	101	279	63	184	50	93	58	89	71	131	200	1178	336	583	178	727	61	98	22	62	12	146	29	302	15	252	20	228	37	334	19	185	15	342	82	110	74	119	88	231	285	131	148	192	198	256	47
YAL021C_1	2	0	0	0	1	0	2	1	2	2	3	0	0	0	1	0	1	0	0	0	0	0	0	0	0	0	0	0	0	0	0	0	0	0	0	0	0	0	1	0	1	0	4	0	3	0	3	0	0
YAL022C	186	175	114	248	72	152	126	192	101	214	130	239	38	37	61	36	50	27	91	245	39	193	27	194	25	184	19	298	19	225	22	364	27	197	15	416	88	135	98	158	90	212	312	150	189	208	211	228	133
YAL023C	0	0	0	0	0	0	0	0	2	0	0	0	0	0	0	0	0	0	0	0	0	0	0	0	2	10	0	0	0	0	0	0	0	0	0	0	0	0	0	0	2	0	1	0	0	0	1	0	0
YAL024C	0	0	0	0	0	0	0	0	0	0	0	0	0	0	0	0	0	0	0	0	0	0	0	0	0	0	0	0	0	0	0	0	0	0	0	0	0	0	0	0	0	0	0	0	0	0	0	0	0
YAL026C	0	0	0	0	0	0	0	0	0	0	0	0	0	0	0	0	0	0	0	0	0	0	0	0	0	0	0	0	0	0	0	0	0	0	0	0	0	0	0	0	0	0	0	0	0	0	0	0	0
YAL028W	281	225	160	356	118	231	162	336	147	368	193	485	181	1052	318	402	233	498	185	426	64	380	33	374	41	612	28	714	30	461	52	422	34	249	20	451	149	150	118	178	108	282	373	146	248	289	275	315	195
YAL029C	68	0	40	6	25	1	95	0	77	1	110	4	14	0	23	0	11	0	45	0	30	0	20	0	11	0	7	0	13	0	9	10	14	3	2	9	56	2	49	0	40	2	142	1	100	3	88	5	27
YAL030W	285	279	164	374	110	259	220	517	186	481	240	661	387	1977	633	1041	414	1221	170	456	87	406	41	426	46	573	44	560	47	498	54	677	42	366	19	728	155	180	139	197	113	320	338	206	227	315	250	395	224
YAL031C	190	157	133	214	57	131	151	286	152	279	151	351	119	422	140	210	119	198	65	307	54	134	34	155	44	119	10	113	34	98	37	410	24	210	24	404	104	92	95	105	112	165	280	113	169	148	206	167	108
YAL032C	261	239	148	314	75	232	190	288	176	315	223	504	63	239	123	139	87	154	180	639	48	568	32	459	43	368	32	286	25	235	44	569	33	346	29	715	169	188	103	172	109	321	313	163	172	171	217	265	69
YAL033W	179	152	121	223	58	136	131	266	118	248	172	302	243	823	316	428	252	657	82	542	53	450	37	386	32	268	24	302	21	266	40	476	26	230	18	523	120	142	91	156	90	295	259	106	121	164	157	196	77
YAL034C	198	195	92	259	60	169	49	73	36	102	48	123	77	418	131	211	92	216	6	73	20	81	13	104	22	136	20	134	21	59	21	242	10	129	11	198	80	122	85	121	83	181	265	94	159	122	181	148	95
YAL034W-A	0	0	0	0	0	0	0	0	0	0	0	0	0	0	0	0	0	0	0	0	0	0	0	0	0	0	0	0	0	0	0	0	0	0	0	0	0	0	0	0	0	0	0	0	0	0	0	0	0
YAL037C-A	221	206	139	298	91	178	168	392	152	385	185	486	330	2140	512	1080	389	1451	151	564	55	593	42	520	52	353	29	373	20	360	47	494	13	255	20	550	136	159	105	168	73	245	326	196	180	301	207	312	133
YAL038W	101	26	66	53	32	25	93	57	87	64	104	66	20	0	30	0	27	6	17	30	35	19	17	7	10	19	3	11	7	33	9	107	11	48	5	112	70	26	53	25	55	45	158	32	90	52	119	57	64
YAL041W	0	0	0	0	0	0	0	0	0	0	0	0	0	0	0	0	0	0	0	0	0	0	0	0	0	0	0	0	0	0	0	0	0	0	0	0	0	0	0	0	0	0	0	0	0	0	0	0	0
YAL042W	2	7	2	8	1	7	4	4	5	9	5	11	0	0	0	0	0	0	0	0	2	0	0	0	0	0	0	0	1	0	1	6	0	6	0	13	4	0	0	0	0	0	6	1	1	1	5	1	0
YAL043C	11	1	4	15	1	3	8	19	19	29	19	40	1	0	2	0	1	0	20	5	2	13	2	5	4	20	1	19	4	46	1	4	1	1	0	0	13	12	8	9	6	34	31	6	15	12	14	13	1
YAL044C	21	33	21	42	11	19	31	73	31	60	37	98	6	0	8	0	6	0	15	107	12	77	3	49	2	53	3	75	1	26	2	78	6	33	1	72	30	53	18	57	22	108	88	29	32	60	43	77	6
YAL044W-A	90	116	56	132	29	88	21	66	38	89	46	102	64	417	110	202	51	167	45	225	14	185	4	184	23	213	7	193	8	135	14	224	10	127	6	316	43	47	26	49	20	97	91	59	34	55	70	81	31
YAL048C	226	151	150	255	78	125	176	299	172	285	196	400	120	609	150	249	111	317	169	545	59	309	38	345	33	245	35	264	29	217	50	447	40	249	25	413	180	249	137	264	132	344	373	129	185	232	256	289	114
YAL049C_1	292	279	177	432	101	237	308	540	257	566	300	728	190	598	283	313	202	356	231	899	115	812	77	944	67	422	30	380	22	361	54	501	41	282	27	566	164	213	149	222	121	376	509	223	236	328	310	360	206
YAL049C_2	238	278	151	377	77	218	146	234	110	223	157	332	101	375	152	171	107	183	118	324	56	262	25	246	35	327	20	332	23	302	24	329	21	179	14	362	140	242	122	225	107	357	299	131	159	235	185	237	78
YAL051W	126	66	71	89	48	53	86	128	75	133	92	183	19	0	27	0	22	0	41	77	42	84	18	89	22	136	16	166	14	111	28	227	21	117	12	239	109	147	89	151	105	239	183	71	136	114	142	109	60
YAL054C	113	71	49	93	29	61	86	108	65	124	75	124	120	465	188	241	150	321	169	398	30	307	12	332	28	94	12	143	13	106	25	217	10	117	7	216	72	46	55	46	43	79	144	51	75	99	114	103	115
YAL055W	176	131	109	202	61	138	91	202	75	224	110	308	113	1069	182	363	119	525	160	427	47	568	19	393	59	779	25	1038	23	704	22	353	19	215	10	411	87	148	87	163	68	219	227	121	133	153	143	228	152
YAL056W	164	105	108	174	48	111	143	173	105	189	151	209	54	247	105	56	66	131	84	195	34	176	35	181	40	235	19	367	20	238	42	324	31	181	17	332	98	57	98	56	89	112	287	126	180	194	225	218	74
YAL059W	159	119	103	209	43	132	65	175	61	171	73	192	16	0	25	4	21	0	60	335	26	316	20	294	38	213	17	282	17	258	39	425	28	245	19	503	77	74	77	99	71	132	265	144	146	203	163	197	56
YAL060W	162	140	138	254	54	170	64	108	54	117	62	151	102	497	179	198	113	250	22	89	8	88	17	84	26	157	17	211	12	140	27	359	20	182	16	332	95	112	69	84	76	176	268	123	165	221	184	230	118
YAL062W	163	143	104	205	58	129	103	184	94	176	111	225	55	173	119	107	70	207	78	390	43	273	22	152	34	423	21	533	26	389	28	377	16	197	14	357	112	161	96	111	90	250	299	119	184	213	222	219	84
YAL064C-A	163	120	115	205	50	123	148	313	124	327	159	436	102	573	167	259	123	311	216	710	73	677	37	727	30	681	20	580	20	562	46	751	41	358	17	744	162	253	124	248	113	415	340	181	214	253	201	282	146
YAL067C	207	108	83	194	66	96	90	194	90	201	107	303	99	648	237	307	89	306	69	343	29	320	17	320	27	422	17	405	15	400	31	321	21	174	20	440	87	111	77	145	57	261	199	61	96	67	157	127	97
YAL068C	208	198	128	294	81	184	149	301	145	314	145	487	123	962	229	438	149	495	127	1430	63	1010	52	1010	53	863	27	830	30	743	52	702	40	429	20	815	121	163	119	138	101	285	447	231	274	403	301	409	209
YAR002W	29	10	22	15	5	11	270	451	231	477	275	604	31	4511	48	2042	28	2413	220	53353	113	50933	71	46806	14	5515	3	6009	17	4869	9	161	5	92	4	146	23	12	22	16	24	21	38	22	24	31	28	33	13
YAR003W	357	338	203	403	153	269	200	410	169	363	186	509	50	0	71	0	60	0	169	1271	68	1014	45	1106	66	564	38	660	44	490	88	1106	43	532	41	1020	215	260	158	300	174	391	570	333	309	526	420	522	188
YAR007C	0	0	0	0	0	0	0	0	0	0	0	0	0	0	0	0	0	0	0	0	0	0	0	0	0	0	0	0	0	0	0	0	0	0	0	0	0	0	0	0	0	0	0	0	0	0	0	0	0
YAR015W	184	127	134	198	68	124	208	385	175	379	215	569	159	873	283	371	159	551	356	665	50	516	45	690	34	319	25	304	28	410	42	517	27	258	22	560	124	235	124	260	121	493	328	143	152	180	204	258	96
YAR018C	266	215	189	316	91	199	168	273	154	249	194	384	59	134	86	66	61	75	210	325	57	240	31	152	41	213	22	188	23	92	37	651	33	288	26	604	139	203	143	221	110	308	315	136	157	194	205	294	156
YAR019C	1	0	1	0	0	0	0	0	1	0	0	0	0	0	0	0	0	0	12	0	0	0	0	0	0	0	0	0	0	0	0	0	0	0	0	0	0	0	1	0	0	0	0	0	1	0	1	1	0
YAR020C	312	366	244	557	99	356	258	517	221	585	281	749	147	846	208	447	158	471	274	1241	100	1011	56	863	43	784	29	949	43	571	67	908	41	437	36	861	156	318	175	323	150	572	445	280	244	426	300	483	189
YAR023C	183	195	150	267	66	160	219	485	188	472	244	651	125	602	235	328	160	373	155	663	88	491	60	419	33	435	21	575	24	471	36	456	17	227	15	461	125	218	118	195	116	362	303	153	207	278	191	267	178
YAR027W	173	172	104	251	60	160	121	234	112	203	120	291	174	1783	353	782	205	1035	138	371	33	303	23	254	34	189	14	127	12	129	24	455	28	217	18	432	64	93	45	82	68	119	221	101	139	131	145	171	65
YAR028W	158	165	92	238	57	151	39	113	51	119	55	188	52	349	120	107	43	153	55	423	22	439	6	384	11	238	7	306	5	210	16	195	6	151	13	317	62	49	47	93	35	184	108	47	39	76	72	117	37
YAR029W	202	170	136	251	66	169	150	353	131	409	157	482	235	1103	365	658	230	798	251	2562	85	1919	42	2196	33	805	23	904	34	793	43	648	27	312	18	726	132	203	114	226	88	357	285	136	159	198	203	228	123
YAR031W	131	101	75	150	45	84	267	472	229	461	274	617	14	0	38	0	27	0	182	493	105	469	51	324	28	144	14	129	15	135	31	293	29	154	17	248	75	82	57	94	83	154	112	49	77	98	80	100	40
YAR035C-A	235	108	131	177	58	108	86	105	91	108	106	156	179	683	294	384	181	413	71	101	37	69	22	61	43	486	27	435	27	514	24	246	19	127	11	245	124	139	101	130	97	181	320	103	169	164	182	223	54
YAR035W	334	337	223	464	127	277	110	154	68	161	108	225	116	635	137	228	140	293	53	301	30	182	25	222	40	410	33	476	30	340	47	625	40	373	28	738	152	187	144	208	122	329	443	216	256	305	268	389	122
YAR042W	73	2	30	3	16	1	40	19	37	8	43	27	7	0	22	0	8	0	19	0	9	0	10	0	5	10	7	0	7	9	7	16	11	8	2	11	43	7	31	5	50	1	91	7	45	9	56	9	16
YBL001C	166	121	103	173	61	108	239	487	208	468	251	631	185	33674	285	15739	207	19855	426	125851	117	114273	78	118504	61	54521	27	62061	32	52662	33	861	27	412	27	828	111	167	104	166	83	241	330	262	201	374	216	425	82
YBL002W	149	125	82	208	63	105	128	215	131	260	147	332	144	715	213	358	154	449	211	655	55	548	40	577	30	209	18	296	23	217	28	441	28	204	19	433	125	160	102	177	72	263	253	150	169	214	196	217	111
YBL003C	88	56	73	95	41	55	126	173	95	162	102	233	12	0	10	0	15	0	181	469	34	338	29	454	16	87	9	89	19	120	14	172	13	90	2	163	48	95	42	97	51	153	94	59	66	91	69	112	102
YBL005W	135	31	81	53	34	35	93	109	84	109	103	140	18	0	28	0	26	0	59	13	33	23	19	11	28	177	17	188	20	123	36	224	23	104	18	157	75	90	66	109	70	148	225	59	135	83	142	107	39
YBL006C	89	121	68	192	42	89	80	122	71	137	69	170	92	460	146	199	105	274	62	276	36	145	11	174	20	46	12	143	9	74	20	180	21	93	10	178	53	95	70	136	55	198	172	89	99	133	113	150	49
YBL007C	47	24	31	37	8	21	14	5	14	6	12	16	43	214	70	108	36	118	19	80	7	27	2	14	8	37	4	32	5	15	12	85	12	43	5	54	33	15	21	17	16	31	93	19	49	17	55	25	13
YBL008W	149	95	92	168	46	99	65	64	43	58	68	87	92	198	115	121	91	155	0	27	23	22	10	16	21	69	8	139	18	67	36	288	22	144	18	255	75	104	73	96	66	182	202	58	115	86	130	121	104
YBL008W-A	191	168	85	212	61	143	119	247	99	189	116	298	243	1506	435	608	252	913	69	286	27	240	16	378	19	141	22	330	13	195	27	314	25	165	20	317	81	102	77	88	68	165	263	119	111	130	169	200	159
YBL009W	203	143	120	176	84	108	154	268	136	285	189	314	18	17	23	0	9	0	76	879	67	957	29	778	27	213	8	236	16	192	20	196	15	81	11	171	57	98	59	120	73	152	165	46	98	99	125	136	53
YBL010C	49	33	26	48	7	28	89	182	81	192	86	227	136	672	198	311	137	327	62	539	42	355	27	357	13	69	6	163	13	77	7	67	8	41	8	64	24	34	19	37	18	54	49	16	30	33	28	41	59
YBL011W	173	144	110	165	44	94	86	202	99	167	119	252	62	247	71	66	63	85	92	611	37	622	29	481	46	377	22	561	21	401	36	306	24	219	17	327	90	110	97	115	89	219	248	82	164	156	186	216	84
YBL013W	249	262	165	407	105	263	112	253	110	247	146	321	87	425	169	155	115	203	169	283	44	266	39	270	51	354	15	319	28	225	43	491	30	322	18	507	106	166	100	150	91	254	340	187	208	317	258	326	134
YBL015W	76	62	42	79	9	44	33	45	27	50	23	62	57	247	101	154	64	128	29	51	10	96	7	49	11	129	3	183	11	127	12	92	9	64	3	105	30	43	36	58	32	95	157	53	102	99	108	118	71
YBL017C	21	7	19	10	9	9	22	23	25	19	34	32	5	0	9	0	8	0	0	22	6	9	10	5	12	14	4	17	5	8	7	46	5	31	5	31	29	14	12	14	25	25	65	6	44	21	39	9	12
YBL018C	241	191	163	325	65	183	149	304	131	299	172	380	143	502	247	251	144	305	77	476	69	377	42	363	37	691	30	628	29	469	46	654	32	295	20	582	135	231	121	258	136	425	443	179	210	275	255	294	119
YBL019W	145	107	85	190	57	103	96	192	82	202	105	298	26	175	59	60	34	55	90	222	30	166	23	247	27	288	15	300	9	201	32	316	24	161	17	340	58	105	69	102	57	193	226	68	118	124	124	151	26
YBL020W	0	0	0	0	0	0	0	0	0	0	0	0	0	0	0	0	0	0	0	0	0	0	0	0	0	0	0	0	0	0	0	0	0	0	0	0	0	0	0	0	0	0	0	0	0	0	0	0	0
YBL021C	73	49	67	79	21	64	119	210	92	204	110	281	36	86	39	38	37	93	90	400	33	279	24	284	23	149	18	204	13	154	19	284	18	145	9	272	47	70	44	61	42	115	219	101	107	177	141	208	50
YBL022C	0	0	0	0	0	0	0	0	0	0	0	0	0	0	0	0	0	0	0	0	0	0	0	0	0	0	0	0	0	0	0	0	0	0	0	0	0	0	0	0	0	0	0	0	0	0	0	0	0
YBL023C	146	23	82	20	46	10	84	55	72	47	120	58	30	0	49	0	34	0	19	40	33	38	23	44	20	8	28	0	17	3	25	111	19	49	6	124	105	16	81	17	106	66	308	22	170	38	189	50	41
YBL024W	338	242	233	475	124	267	165	295	169	326	199	391	41	0	41	0	38	0	71	297	84	318	47	284	33	117	30	91	29	113	49	480	41	242	23	469	138	180	116	180	122	330	409	174	273	253	262	332	134
YBL025W	63	61	36	129	24	70	89	232	85	205	86	282	4	0	8	0	6	0	102	1311	45	1075	30	1006	3	42	3	55	5	85	13	164	13	103	5	176	24	89	30	91	34	174	85	46	39	86	54	94	46
YBL026W	156	172	114	293	68	178	55	91	41	89	51	121	17	85	45	49	24	67	66	298	27	137	12	211	37	467	23	502	24	315	18	309	19	179	12	313	65	125	82	175	60	252	217	108	125	157	130	201	113
YBL028C	205	188	135	271	74	179	193	328	149	340	202	458	182	343	256	203	178	223	160	274	71	177	45	138	36	142	17	200	20	129	37	344	26	166	15	323	81	90	70	105	68	146	290	141	167	246	211	294	88
YBL029C-A	0	0	0	0	0	0	0	0	0	0	0	0	0	0	0	0	0	0	0	0	0	0	0	0	0	0	0	0	0	0	0	0	0	0	0	0	0	0	0	0	0	0	0	0	0	0	0	0	0
YBL029W	144	104	97	143	65	116	115	206	107	221	132	288	15	1	43	0	29	0	60	596	56	564	40	684	26	330	16	369	16	208	49	558	49	244	30	472	98	261	116	219	87	321	264	105	158	202	160	192	64
YBL031W	57	39	37	42	14	31	53	105	64	97	67	149	153	810	241	278	151	342	71	36	15	38	8	33	15	84	6	65	10	65	2	77	5	44	4	108	42	58	28	53	30	76	47	7	10	12	17	15	34
YBL032W	226	98	128	132	64	95	89	86	80	127	87	131	65	310	103	189	95	202	83	627	53	482	27	485	16	76	20	120	25	98	36	173	25	66	18	127	70	115	77	87	79	241	175	49	107	79	138	71	70
YBL035C	13	14	12	34	9	7	8	30	14	26	9	44	0	0	4	0	3	0	0	40	8	18	2	16	1	0	0	0	3	0	5	46	1	18	0	35	7	7	5	7	3	7	20	10	14	21	22	9	2
YBL036C	12	0	11	4	10	1	45	58	31	85	44	105	119	480	169	132	122	179	35	0	12	1	1	0	16	311	6	276	5	248	4	136	13	77	2	190	25	37	27	36	22	61	43	18	30	30	42	40	9
YBL037W	56	17	30	36	17	19	25	34	23	41	22	38	42	131	84	136	59	168	48	70	11	8	9	20	7	7	3	15	1	17	5	13	2	23	2	38	20	24	17	24	26	38	60	9	34	15	29	17	12
YBL038W	0	0	0	0	0	0	0	0	0	0	0	0	0	0	0	0	0	0	0	0	0	0	0	0	0	0	0	0	0	0	0	0	0	0	0	0	0	0	0	0	0	0	0	0	0	0	0	0	0
YBL039C	0	0	0	0	0	0	0	0	0	0	0	0	0	0	0	0	0	0	0	0	0	0	0	0	0	0	0	0	0	0	0	0	0	0	0	0	0	0	0	0	0	0	0	0	0	0	0	0	0
YBL040C	277	242	129	390	116	250	142	346	106	389	148	487	106	604	218	348	127	392	200	788	58	594	31	462	56	1122	34	1081	32	722	50	484	29	242	29	516	114	164	102	182	99	389	316	130	197	253	195	253	181
YBL041W	0	0	0	0	0	0	0	0	0	0	0	0	0	0	0	0	0	0	0	0	0	0	0	0	0	0	0	0	0	0	0	0	0	0	0	0	0	0	0	0	0	0	0	0	0	0	0	0	0
YBL042C	0	0	0	0	0	0	0	0	0	0	0	0	0	0	0	0	0	0	0	0	0	0	0	0	0	0	0	0	0	0	0	0	0	0	0	0	0	0	0	0	0	0	0	0	0	0	0	0	0
YBL045C	121	71	68	93	41	58	58	114	47	122	76	144	65	316	94	114	78	171	62	102	27	159	15	79	20	100	8	48	9	60	19	273	15	117	14	263	75	65	39	66	64	121	174	77	97	125	125	166	51
YBL047C	0	0	0	0	0	0	0	0	0	0	0	0	0	0	0	0	0	0	0	0	0	0	0	0	0	0	0	0	0	0	0	0	0	0	0	0	0	0	0	0	0	0	0	0	0	0	0	0	0
YBL049W	219	419	138	628	71	339	76	158	64	187	79	232	250	3776	395	1927	276	2292	90	946	34	895	24	836	20	644	14	669	15	583	12	343	16	174	8	313	69	191	63	182	69	294	213	132	94	191	146	217	71
YBL050W	287	207	200	331	104	202	246	457	213	458	249	643	190	1220	361	645	268	855	222	893	107	669	78	756	58	359	26	354	35	306	57	633	41	286	25	589	173	155	128	195	159	374	455	204	282	373	305	375	111
YBL051C	211	144	155	213	85	106	163	232	166	242	237	361	115	80	144	56	91	36	114	156	63	103	39	105	39	146	21	220	36	180	38	399	29	193	34	442	157	137	153	168	134	310	454	101	244	194	304	215	78
YBL052C	170	114	119	153	52	90	151	260	103	297	157	360	23	0	39	0	20	0	118	499	50	400	32	478	28	115	25	145	25	195	39	307	33	164	19	277	112	108	94	108	98	213	260	105	136	105	203	143	85
YBL054W	169	137	89	232	55	117	71	134	61	156	78	190	56	127	102	43	56	102	29	60	23	77	13	74	24	103	15	110	13	55	9	155	15	90	12	126	69	50	71	61	75	79	183	90	113	92	139	154	98
YBL055C	79	67	39	77	26	56	28	32	35	36	33	61	23	64	46	53	22	56	50	286	9	161	6	173	14	228	6	187	9	108	13	84	8	47	6	167	40	25	26	48	20	112	105	47	37	47	53	93	12
YBL056W	148	92	64	135	49	87	90	125	74	129	75	162	15	13	28	1	23	17	34	248	15	235	16	353	11	68	9	86	12	147	14	154	16	95	7	228	33	33	30	40	32	71	129	61	53	62	89	113	45
YBL057C	129	142	112	188	56	122	66	157	57	199	88	228	82	441	121	327	106	339	55	301	19	197	19	258	20	213	14	172	14	171	23	349	19	182	21	338	78	103	73	117	72	256	229	100	133	135	134	190	168
YBL058W	0	0	0	0	0	0	0	0	0	0	0	0	0	0	0	0	0	0	0	0	0	0	0	0	0	0	0	0	0	0	0	0	0	0	0	0	0	0	0	0	0	0	0	0	0	0	0	0	0
YBL059W	193	141	130	265	55	152	290	576	276	529	326	751	136	593	212	288	144	360	365	904	127	723	91	507	35	210	13	189	19	255	30	278	23	128	17	282	115	144	104	140	95	269	252	99	147	164	176	167	55
YBL060W	0	0	0	0	0	0	0	0	0	0	0	0	0	0	0	0	0	0	0	0	0	0	0	0	0	0	0	0	0	0	0	0	0	0	0	0	0	0	0	0	0	0	0	0	0	0	0	0	0
YBL061C	129	71	84	126	39	63	77	158	64	137	70	180	71	311	137	113	86	103	44	76	43	41	30	35	30	94	17	102	14	105	28	321	18	168	10	338	62	43	62	61	54	66	205	78	121	119	136	170	72
YBL063W	168	5	103	8	50	7	128	23	114	13	134	30	62	63	95	26	45	18	48	31	51	29	30	32	28	20	19	16	19	24	25	34	17	15	7	25	110	11	82	16	88	26	286	5	145	15	187	14	44
YBL064C	116	87	50	147	44	72	66	113	53	98	68	171	8	0	15	0	7	0	65	200	24	135	18	133	13	123	7	131	9	63	7	209	11	85	4	230	46	54	19	57	31	85	92	47	51	55	56	67	46
YBL066C	104	87	56	96	32	64	66	119	58	107	71	142	14	0	34	0	17	0	10	278	21	306	16	243	15	27	13	17	13	24	19	209	17	126	8	210	65	71	67	65	62	91	159	43	95	65	125	83	32
YBL067C	210	121	119	217	53	99	162	333	120	356	140	429	60	206	124	105	59	162	71	637	65	522	25	434	28	395	28	431	20	270	36	325	18	159	27	298	146	205	135	226	117	362	276	129	169	201	197	204	175
YBL068W	121	88	75	110	32	72	108	259	95	273	133	343	248	1348	374	616	297	734	198	903	44	688	21	772	34	355	13	450	21	266	23	275	19	142	18	288	92	102	85	108	80	198	206	78	126	134	171	156	185
YBL069W	154	155	110	220	44	123	95	178	88	180	112	217	155	536	229	212	137	296	88	388	45	397	19	411	25	440	14	442	22	315	26	285	13	149	4	274	89	145	65	148	76	258	272	72	140	155	169	188	100
YBL071C-B	171	292	107	398	48	260	158	390	167	496	187	735	539	5629	897	2436	538	3160	294	3048	74	2686	41	2770	18	1132	23	1189	36	780	24	681	14	316	8	848	111	313	108	415	90	683	102	110	58	127	88	187	98
YBL071W-A	196	133	134	185	58	153	189	340	180	413	210	492	114	205	153	162	126	204	119	204	40	169	36	211	29	186	17	79	19	48	41	518	46	267	21	513	106	81	81	105	86	175	310	160	184	258	195	253	145
YBL072C	66	27	53	45	33	28	91	88	69	86	82	136	36	21	70	22	54	20	29	17	25	10	16	14	5	3	9	0	7	0	14	113	9	77	9	105	39	45	40	37	41	88	126	35	58	47	68	58	27
YBL074C	211	139	114	214	54	121	228	303	148	298	202	421	267	779	369	401	255	483	174	521	66	363	41	531	42	223	28	208	33	208	56	663	44	318	26	636	171	198	166	225	123	422	405	153	212	273	268	298	181
YBL076C	27	29	20	36	12	28	22	59	27	40	40	68	190	673	304	276	203	384	6	18	12	31	4	39	4	0	2	0	4	0	2	17	3	5	2	10	10	17	9	16	10	24	26	7	17	7	25	10	32
YBL078C	81	72	59	116	34	65	79	179	71	207	86	221	232	1529	317	687	234	791	51	374	38	227	12	266	26	121	14	138	12	84	16	286	17	154	8	250	68	137	70	147	51	222	146	93	94	129	106	145	33
YBL079W	129	59	100	73	58	59	62	69	52	73	58	97	26	4	35	0	16	0	38	302	28	139	16	104	23	103	9	185	14	86	40	237	36	127	13	235	69	66	91	77	78	135	247	46	129	68	169	94	65
YBL081W	58	40	53	70	18	31	123	271	130	258	146	369	53	134	63	42	44	82	98	402	45	227	27	247	13	111	11	104	8	123	15	190	11	99	7	206	51	64	39	37	34	85	104	41	72	64	70	83	101
YBL085W	224	156	147	197	72	121	138	251	126	245	138	310	92	425	147	212	111	392	96	176	41	124	24	125	33	270	25	311	34	278	46	472	27	220	19	399	152	216	159	225	131	347	323	135	181	135	225	206	192
YBL086C	137	114	95	161	44	92	148	283	109	301	146	325	179	848	277	572	202	639	87	561	53	338	40	355	27	318	24	323	17	271	39	399	31	251	19	457	120	221	98	218	98	322	257	134	151	223	171	262	143
YBL087C	178	111	103	190	43	104	66	100	56	107	83	150	13	0	29	0	24	0	62	116	28	76	16	23	20	89	16	113	14	78	30	268	21	131	9	250	74	98	79	102	75	190	261	96	140	134	163	182	90
YBL089W	36	28	16	38	8	22	37	68	24	79	37	114	7	0	9	0	4	0	45	50	15	62	9	53	10	26	3	101	6	120	10	114	14	66	7	157	32	48	28	53	28	112	49	28	46	53	36	54	12
YBL090W	118	95	83	136	36	88	34	74	58	71	54	108	141	793	248	468	140	530	15	38	9	23	7	21	20	218	19	211	13	115	17	197	20	96	14	191	49	73	71	87	66	126	156	68	80	102	104	127	66
YBL091C	65	55	44	103	26	48	47	85	49	59	59	94	80	318	118	166	72	190	10	238	20	223	11	92	6	21	7	58	6	39	13	120	12	98	6	127	39	74	38	66	34	110	115	42	68	57	61	73	19
YBL091C-A	84	27	71	57	55	38	75	127	48	113	64	148	187	851	262	475	204	495	45	310	15	266	22	249	30	188	23	115	20	154	31	467	28	238	17	476	104	101	66	95	78	134	313	134	168	224	218	250	106
YBL092W	273	102	146	181	79	104	177	236	162	203	209	333	175	303	249	116	176	129	173	83	80	99	49	45	34	9	23	26	26	31	56	510	40	242	30	496	141	95	121	102	128	163	414	114	226	205	268	232	109
YBL102W	128	146	78	213	42	128	187	456	172	435	201	630	58	389	98	129	53	200	114	715	97	437	51	520	16	135	8	136	12	97	18	321	9	199	7	341	68	79	51	84	46	132	121	75	69	117	82	134	46
YBL103C	129	76	80	134	48	75	62	101	50	87	79	110	99	771	169	317	152	382	49	269	19	129	15	108	18	98	15	96	20	85	31	379	18	200	11	355	100	109	81	128	86	179	266	91	143	137	172	158	97
YBL104C	125	69	65	124	31	69	80	123	48	85	80	154	22	0	32	0	23	0	61	108	25	64	13	72	16	217	17	130	20	278	29	315	18	142	15	271	108	136	97	141	100	220	255	68	155	113	161	115	87
YBL105C	93	57	57	46	34	47	53	95	45	96	66	136	212	1228	351	577	235	721	0	158	15	140	12	77	23	88	11	116	10	101	29	203	21	121	18	239	70	42	61	38	72	75	188	59	116	81	137	97	49
YBL106C	138	54	64	86	58	46	39	38	38	58	31	50	32	0	36	1	29	0	18	43	15	16	2	30	15	177	10	369	17	201	24	267	25	137	17	317	115	103	105	144	70	249	237	78	119	82	178	114	105
YBL107C	214	221	142	334	74	174	224	411	159	434	221	578	261	1069	334	523	270	552	85	372	77	309	43	443	34	387	27	435	18	303	47	485	35	286	29	498	140	155	118	203	117	277	353	180	197	275	243	309	138
YBR001C	194	86	126	167	68	92	100	109	91	114	104	149	80	309	156	169	65	174	52	519	39	472	25	378	44	221	15	234	21	253	35	244	24	155	14	252	107	146	77	124	78	240	225	110	148	147	179	167	89
YBR002C	139	106	84	208	36	123	22	38	22	54	33	64	14	0	27	0	20	0	10	132	12	101	3	74	36	266	14	312	28	288	31	348	27	190	15	419	72	84	28	102	49	135	274	120	175	215	179	226	59
YBR003W	38	28	32	43	15	29	131	198	105	212	110	240	10	0	9	0	5	2	149	336	41	277	37	200	21	92	6	136	11	80	12	94	1	82	5	107	19	10	24	14	31	34	48	32	41	39	36	43	34
YBR004C	28	9	3	16	11	11	12	11	12	19	11	36	14	54	17	38	11	27	12	95	5	79	5	65	1	22	1	58	4	53	3	55	2	37	2	184	17	10	7	15	3	19	21	10	6	12	10	14	3
YBR007C	229	204	195	324	89	187	164	377	136	356	199	500	108	481	185	246	152	265	126	714	75	449	55	751	45	1253	28	1038	42	867	58	604	42	331	22	579	172	225	145	264	138	474	474	183	252	319	295	329	220
YBR009C	285	118	140	212	78	127	218	388	182	396	240	521	133	494	204	223	126	219	170	844	87	605	46	505	30	97	30	116	25	118	62	531	48	318	28	596	146	164	128	139	143	267	415	169	250	261	266	280	222
YBR011C	154	134	108	221	57	122	102	202	106	241	163	320	60	221	105	134	73	111	151	444	41	443	29	459	28	203	15	206	19	156	21	326	32	203	22	441	108	116	80	124	82	265	253	106	125	164	164	225	81
YBR018C	120	121	60	186	38	136	89	149	81	133	95	218	73	393	128	252	67	325	66	388	25	282	22	179	9	97	7	121	6	63	11	156	9	78	7	143	33	38	25	46	26	81	46	31	32	51	32	51	34
YBR019C	0	0	0	0	0	0	0	0	0	0	0	0	0	0	0	0	0	0	0	0	0	0	0	0	0	0	0	0	0	0	0	0	0	0	0	0	0	0	0	0	0	0	0	0	0	0	0	0	0
YBR020W	67	55	53	86	25	52	57	113	45	103	33	141	7	0	8	0	5	1	26	52	16	50	6	39	9	87	4	94	11	60	11	123	12	67	4	109	25	32	13	27	27	47	88	43	47	74	38	69	27
YBR021W	0	0	0	0	0	0	0	0	0	0	0	0	0	0	0	0	0	0	0	0	0	0	0	0	0	0	0	0	0	0	0	0	0	0	0	0	0	0	0	0	0	0	0	0	0	0	0	0	0
YBR022W	266	233	164	346	80	192	168	461	146	413	185	561	145	909	261	443	145	540	97	1098	86	1044	49	739	35	315	22	536	28	354	45	522	40	294	28	592	169	191	150	201	112	339	362	187	230	278	268	328	138
YBR025C	304	210	198	306	110	178	191	226	145	258	177	322	80	72	126	48	69	53	67	224	71	253	33	114	47	192	33	219	36	146	50	399	36	245	26	442	150	189	156	160	148	255	447	180	262	295	340	313	198
YBR026C	201	173	112	258	52	141	88	126	55	147	88	185	133	734	210	304	133	374	52	560	35	314	22	218	32	238	19	391	29	215	33	426	32	231	25	477	92	86	92	99	92	219	330	141	171	242	204	266	188
YBR028C	259	163	151	272	80	151	251	563	219	473	285	646	196	709	270	435	214	476	224	1029	100	891	56	865	43	329	30	463	26	261	71	746	57	404	37	794	178	286	195	280	170	468	440	197	259	294	276	370	227
YBR029C	141	100	81	149	44	94	145	292	150	347	169	465	154	959	211	409	180	507	55	945	76	805	44	747	28	275	19	165	14	245	29	363	26	176	14	332	95	165	80	184	96	304	212	84	119	160	167	178	40
YBR030W	63	91	43	150	20	63	34	57	41	66	40	75	75	535	122	239	99	369	20	110	9	55	7	91	7	87	8	149	5	36	9	124	4	53	3	138	26	19	24	18	23	44	122	54	55	76	53	109	9
YBR031W	18	6	11	7	6	5	36	53	49	36	43	81	4	0	5	0	4	0	10	0	13	2	10	0	2	0	2	0	2	3	4	16	2	9	4	39	28	10	15	15	12	21	46	8	32	23	33	37	3
YBR034C	39	11	25	35	10	20	29	13	35	13	30	37	54	221	123	179	49	95	16	47	0	110	3	67	1	110	7	110	5	32	3	73	2	34	5	99	45	4	24	9	17	23	94	41	32	35	86	14	10
YBR035C	8	1	16	2	8	1	178	364	134	362	179	509	83	333	133	107	88	117	64	327	58	225	30	234	11	234	5	223	7	168	0	33	2	6	3	32	33	83	32	79	29	174	37	9	21	17	29	13	54
YBR036C	5	0	2	0	6	0	27	47	33	37	17	59	2	0	2	0	4	0	18	49	11	41	9	14	3	54	1	15	2	67	4	23	1	11	0	27	8	0	2	0	7	0	24	2	9	4	12	5	3
YBR037C	191	153	113	253	79	195	108	239	118	265	105	347	110	714	171	290	114	330	120	288	49	358	24	241	45	669	23	665	22	366	47	552	39	340	24	626	134	274	139	255	137	418	355	122	191	208	208	273	103
YBR040W	290	288	198	428	104	265	245	506	179	493	227	617	67	277	130	110	74	95	163	606	82	394	46	400	57	447	32	872	42	439	41	612	44	327	20	601	138	144	125	136	100	267	402	217	262	298	323	370	179
YBR041W	45	40	23	78	14	33	14	39	20	41	25	50	75	261	118	161	72	139	25	162	17	157	7	133	7	28	4	61	4	28	3	65	1	30	2	47	36	37	26	42	11	83	77	24	37	49	56	44	16
YBR042C	0	0	0	0	0	0	0	0	0	0	0	0	0	0	0	0	0	0	0	0	0	0	0	0	0	0	0	0	0	0	0	0	0	0	0	0	0	0	0	0	0	0	0	0	0	0	0	0	0
YBR043C	94	90	64	146	35	97	22	60	17	73	39	84	63	257	98	91	74	140	19	108	12	69	8	26	19	59	6	73	9	62	14	113	7	41	6	95	45	94	50	69	27	131	150	53	84	112	101	109	64
YBR044C	77	25	41	42	31	31	107	152	94	155	90	210	9	0	22	0	16	0	40	74	25	91	18	105	20	109	11	211	10	168	14	171	7	79	8	114	36	24	53	29	32	61	59	16	41	30	41	28	35
YBR045C	383	260	242	459	151	293	162	325	173	289	185	423	140	386	211	167	144	230	90	558	85	529	46	503	69	544	33	615	24	567	66	790	50	499	29	807	236	275	200	295	192	484	560	178	296	300	370	343	257
YBR046C	264	274	176	411	83	240	156	250	116	228	127	314	43	170	88	77	54	71	102	470	65	426	42	361	61	635	25	771	35	617	63	766	36	387	33	776	124	149	107	198	110	301	381	178	214	289	258	356	192
YBR048W	171	94	88	159	65	93	180	287	172	319	202	474	45	43	67	20	54	40	79	152	77	109	36	173	29	211	19	185	17	223	37	303	22	176	15	329	142	184	104	194	108	332	205	74	137	121	154	114	82
YBR049C	0	0	0	0	0	0	0	0	0	0	0	0	0	0	0	0	0	0	0	0	0	0	0	0	0	0	0	0	0	0	0	0	0	0	0	0	0	0	0	0	0	0	0	0	0	0	0	0	0
YBR050C	314	275	202	408	87	234	133	237	124	228	139	313	339	1529	488	862	342	974	163	352	50	381	37	224	43	266	24	280	27	235	48	705	47	370	20	698	189	311	135	299	154	500	478	205	259	315	352	424	128
YBR052C	234	184	144	270	74	159	128	237	111	260	129	314	143	431	149	211	165	257	115	361	42	376	26	233	59	449	25	462	37	305	57	666	38	338	31	659	209	383	168	373	182	623	480	219	282	385	311	401	136
YBR053C	294	269	176	411	106	235	231	430	194	418	261	551	271	1281	425	614	338	824	198	647	87	476	50	596	51	566	28	552	44	601	69	849	48	485	33	764	149	193	129	182	124	321	467	248	279	403	346	446	122
YBR056W	230	136	126	215	62	137	208	379	197	356	228	502	100	436	166	185	122	259	197	583	103	328	48	363	40	286	21	406	33	239	41	868	32	246	15	433	114	160	121	163	124	238	255	80	147	147	197	170	131
YBR056W-A	113	106	63	172	34	67	27	71	25	30	32	89	88	407	165	255	121	260	36	2	12	0	7	0	14	272	13	221	6	214	27	266	6	156	6	313	64	105	30	77	41	184	209	124	110	223	137	217	73
YBR057C	161	137	86	205	59	131	164	230	101	251	141	327	77	639	144	372	106	445	14	291	49	292	17	341	46	226	24	267	26	201	48	813	27	359	15	690	109	124	98	127	94	267	349	238	235	381	291	405	174
YBR058C-A	64	51	40	59	26	38	63	103	65	126	69	138	51	354	119	227	52	166	34	53	19	30	13	30	9	116	2	42	8	56	11	179	11	97	6	228	32	10	24	61	17	105	121	51	62	51	76	98	25
YBR060C	183	181	146	268	77	192	177	280	184	355	212	422	191	717	260	345	175	340	108	713	70	605	40	499	39	513	24	545	29	429	49	464	26	262	20	540	135	208	119	216	124	389	264	120	156	179	196	200	137
YBR061C	94	92	49	158	23	87	186	415	174	404	199	489	37	220	60	86	34	90	135	630	67	443	47	500	13	261	9	126	12	162	13	223	9	135	8	225	34	93	50	75	31	108	67	20	37	40	39	54	17
YBR062C_1	345	266	253	458	125	268	222	407	199	428	226	545	43	0	62	1	42	0	166	1105	82	773	48	850	86	557	39	720	45	641	53	695	45	415	30	741	182	248	153	283	160	477	472	241	281	441	306	454	268
YBR062C_2	149	97	98	189	56	95	114	228	103	212	116	260	397	1650	531	710	387	841	56	221	48	129	23	160	38	367	16	405	26	392	36	499	27	219	18	442	95	89	84	85	86	152	322	99	172	176	183	189	94
YBR063C	121	78	78	113	41	65	147	366	117	292	157	406	193	1028	336	504	211	582	189	1514	94	1000	45	1187	35	347	19	431	20	304	34	565	24	314	20	574	116	169	94	184	102	308	292	101	164	167	177	197	87
YBR065C	165	209	108	298	44	164	126	274	106	266	107	319	139	538	188	244	142	315	67	266	42	156	27	196	33	475	23	666	19	438	21	315	12	205	13	323	105	232	113	211	78	397	262	131	156	189	192	198	147
YBR066C	331	312	232	503	117	303	241	526	205	529	242	675	442	2411	637	1190	494	1484	162	812	103	799	51	556	47	555	32	675	42	630	79	830	73	428	49	674	217	362	182	326	179	679	512	269	303	394	318	499	334
YBR067C	245	156	142	234	71	158	210	353	186	350	227	474	147	857	230	480	155	635	194	735	67	689	49	586	33	350	24	366	17	261	50	712	46	312	27	660	123	167	112	158	122	298	346	160	219	250	260	302	99
YBR068C	162	89	92	134	52	98	130	221	103	214	148	297	147	597	252	358	149	385	73	159	41	138	30	94	28	147	19	164	17	151	28	317	29	154	15	349	104	91	88	100	86	162	209	84	126	150	147	159	89
YBR069C	153	86	94	127	57	74	120	230	105	249	131	336	114	345	207	231	153	277	46	66	50	66	24	130	43	220	20	248	18	143	53	460	42	255	21	472	147	125	112	171	116	253	454	187	255	263	299	308	173
YBR070C	167	144	106	319	55	154	101	185	72	177	104	286	62	262	126	131	53	119	119	620	36	667	25	549	37	386	22	454	21	376	23	387	19	190	11	393	81	98	59	114	67	267	226	93	157	178	148	194	137
YBR071W	163	213	101	332	69	217	193	429	173	403	221	576	23	0	32	0	20	2	257	1195	85	947	42	963	23	284	13	310	21	249	40	717	30	382	19	724	84	108	48	99	62	195	216	74	117	127	136	147	267
YBR072C-A	262	281	166	481	100	278	156	243	125	247	153	346	66	720	137	352	88	492	207	1635	55	1522	42	1187	37	632	26	764	24	600	28	445	16	199	15	446	121	136	72	117	95	219	266	154	135	278	175	274	142
YBR072W	250	202	138	350	78	200	221	383	160	374	212	455	105	343	215	159	128	248	102	469	87	415	62	316	51	324	20	395	28	380	42	569	44	358	26	664	131	158	114	148	112	280	307	149	190	215	212	282	131
YBR074W	27	11	18	23	14	13	45	100	45	118	42	141	4	0	9	0	5	0	9	42	10	73	8	113	10	80	3	143	0	39	8	94	6	66	5	148	25	0	11	0	13	0	48	18	25	20	26	19	11
YBR076W	227	140	145	230	72	168	139	314	133	361	184	434	93	524	122	219	130	335	121	514	73	321	27	490	63	695	41	830	51	648	47	618	44	299	27	559	149	189	125	221	116	339	435	211	250	344	284	344	165
YBR077C	338	248	252	393	104	234	129	165	122	178	114	225	365	3406	646	1871	406	2026	136	551	51	555	35	609	48	553	26	649	44	471	84	854	63	470	29	823	198	230	168	248	137	417	169	97	114	157	144	145	179
YBR078W	296	102	153	177	81	88	124	170	129	172	141	256	33	31	53	20	54	19	60	36	40	32	37	38	27	10	27	0	18	17	49	394	35	131	26	325	118	28	97	31	88	71	279	68	173	117	214	107	74
YBR079C	0	0	0	0	0	0	0	0	0	0	0	0	0	0	0	0	0	0	0	0	0	0	0	0	0	0	0	0	0	0	0	0	0	0	0	0	0	0	0	0	0	0	0	0	0	0	0	0	0
YBR080C	171	118	121	166	49	85	114	141	94	104	119	166	39	60	86	41	50	30	87	30	43	32	22	32	28	39	14	48	17	74	47	426	25	217	26	380	102	98	95	111	86	209	275	83	168	144	175	150	71
YBR081C	0	0	0	0	0	0	0	0	0	0	0	0	0	0	0	0	0	0	0	0	0	0	0	0	0	0	0	0	0	0	0	0	0	0	0	0	0	0	0	0	0	0	0	0	0	0	0	0	0
YBR082C	161	117	111	178	56	119	150	188	150	214	178	266	196	1427	334	817	212	1043	225	1071	56	1253	42	1039	37	355	21	355	25	183	36	427	24	220	14	440	126	100	75	95	103	148	292	118	149	213	179	230	110
YBR083W	187	191	98	281	60	153	128	321	128	288	126	401	288	2127	494	1032	331	1212	145	1203	75	1016	37	772	41	338	19	450	25	315	39	342	26	216	28	419	108	109	84	112	88	293	312	164	167	240	210	324	111
YBR084C-A	206	138	115	251	76	151	179	320	143	294	172	334	65	141	92	102	62	109	141	161	51	171	37	122	27	66	30	110	23	64	39	389	25	206	27	365	111	127	89	175	99	247	300	153	178	232	241	304	172
YBR084W	115	101	85	149	52	96	81	119	62	125	94	149	21	65	46	51	36	34	51	88	26	52	18	89	17	49	15	28	17	46	11	101	7	48	10	123	72	93	68	76	55	139	146	32	91	69	89	66	41
YBR085C-A	209	220	130	319	77	202	76	161	60	193	85	277	33	110	87	48	48	39	124	349	21	281	16	259	26	405	21	518	25	394	40	591	34	249	18	533	108	138	92	154	87	223	257	90	165	169	177	233	133
YBR085W	221	178	161	252	61	174	95	293	100	260	143	363	89	305	151	161	131	150	70	417	54	230	45	279	27	172	18	45	23	94	43	558	39	303	27	580	98	141	103	193	116	271	321	172	214	280	203	300	178
YBR087W	87	70	71	111	36	70	558	1033	459	1082	569	1538	16	0	23	0	15	0	443	4175	195	3428	128	3029	17	187	10	109	16	76	15	243	16	96	12	180	76	98	56	129	56	202	87	35	71	48	53	49	32
YBR090C	174	156	104	221	67	137	113	240	118	240	125	321	120	254	194	135	133	90	65	262	50	150	16	183	25	291	21	337	24	262	51	759	42	425	31	733	117	68	83	69	82	123	326	147	183	299	223	346	91
YBR092C	146	130	105	199	46	116	114	133	77	158	88	222	126	418	166	162	128	151	55	54	23	33	21	14	28	162	15	202	21	139	24	360	22	179	8	348	102	109	74	119	66	231	225	79	132	97	156	115	94
YBR093C	59	50	41	68	19	42	65	135	49	147	83	158	38	260	74	105	49	228	42	387	26	223	11	162	18	197	8	190	12	184	21	201	22	87	20	190	46	57	30	66	38	124	100	39	56	58	64	62	38
YBR094W	0	0	0	0	0	0	0	0	0	0	0	0	0	0	0	0	0	0	0	0	0	0	0	0	0	0	0	0	0	0	0	0	0	0	0	0	0	0	0	0	0	0	0	0	0	0	0	0	0
YBR096W	200	177	173	248	65	156	175	374	166	339	209	482	267	1369	433	683	286	828	110	470	65	300	39	277	35	504	25	414	38	305	57	714	37	383	27	708	147	194	134	205	126	286	382	161	209	221	221	272	148
YBR098W_2	100	57	68	89	33	54	70	137	71	145	74	162	23	0	33	0	19	0	94	312	26	221	24	174	23	201	15	204	16	214	35	325	24	157	10	316	101	139	78	142	91	225	241	81	132	100	164	114	74
YBR102C	270	165	161	284	94	172	154	303	163	302	178	401	160	1049	239	502	158	566	120	431	50	371	30	302	57	210	28	230	37	340	44	383	34	192	23	354	139	105	130	142	110	205	453	131	255	186	251	255	135
YBR103W	74	33	6	69	43	21	1	2	10	7	5	6	1	2	6	29	2	1	9	30	2	43	5	4	0	16	0	28	1	129	3	46	2	13	9	294	3	0	0	4	1	37	14	18	6	5	8	28	1
YBR104W	123	63	77	99	35	66	89	218	64	237	109	277	192	696	279	393	245	464	0	65	22	31	22	34	50	622	22	715	24	496	41	412	21	214	18	428	132	213	95	196	104	359	284	102	156	167	197	201	97
YBR105C	43	15	26	35	24	26	53	102	56	86	59	124	13	0	22	0	10	0	31	100	25	52	23	92	13	67	7	52	9	42	17	135	6	65	7	154	31	66	47	71	41	142	135	57	87	63	106	87	105
YBR106W	34	8	30	9	12	8	53	86	46	73	47	105	44	179	58	79	35	77	33	166	11	106	20	99	6	31	5	27	5	50	9	142	8	48	9	85	20	35	27	33	31	43	48	17	22	27	28	24	19
YBR107C	201	230	101	343	60	203	58	135	81	159	91	192	86	442	112	195	51	224	156	650	25	640	11	427	26	517	10	376	17	372	26	318	19	187	17	473	101	108	59	153	69	264	224	111	88	129	158	204	68
YBR108W	148	84	69	111	42	74	19	31	22	33	20	32	10	5	27	2	22	2	1	63	4	30	2	60	19	60	5	49	11	75	26	68	12	66	8	124	51	56	46	62	46	119	134	41	91	70	98	64	29
YBR109C	0	0	0	0	0	0	0	0	0	0	0	0	0	0	0	0	0	0	0	0	0	0	0	0	0	0	0	0	0	0	0	0	0	0	0	0	0	0	0	0	0	0	0	0	0	0	0	0	0
YBR110W	145	185	118	310	50	167	130	234	87	251	112	350	171	1095	302	447	199	553	148	943	43	664	30	795	27	475	16	547	20	382	33	488	23	263	18	518	50	86	60	88	55	170	151	104	80	164	109	201	121
YBR111C	134	101	79	119	39	99	120	282	119	257	143	331	173	675	301	451	217	440	84	203	45	196	30	181	32	302	20	289	30	249	31	375	25	197	13	411	132	244	128	264	134	450	263	116	179	197	202	246	103
YBR111W-A	147	153	94	240	50	105	84	157	101	186	103	280	104	334	157	219	92	281	59	229	30	241	9	347	21	268	11	280	17	353	24	431	22	178	22	505	121	75	73	109	55	181	218	83	105	125	153	177	75
YBR114W	0	0	0	0	0	0	0	0	0	0	0	0	0	0	0	0	0	0	0	0	0	0	0	0	0	0	0	0	0	0	0	0	0	0	0	0	0	0	0	0	0	0	0	0	0	0	0	0	0
YBR117C	196	172	124	314	84	171	48	100	47	79	73	113	39	49	69	26	53	27	47	135	15	97	14	97	36	138	14	121	28	129	27	420	36	262	18	451	105	96	87	102	90	172	320	143	159	228	187	266	85
YBR118W	60	1	38	7	17	4	127	24	142	25	181	35	5	0	23	0	21	0	78	1	41	3	28	11	17	0	1	0	11	0	12	10	6	6	3	23	56	1	28	3	19	4	113	7	66	9	80	6	26
YBR120C	267	238	159	365	65	237	213	389	192	375	223	548	248	1080	311	600	285	766	262	855	67	598	58	568	39	307	24	322	33	279	30	645	31	330	30	564	139	249	132	214	135	388	382	174	197	263	264	359	146
YBR121C	0	0	0	0	0	0	0	0	0	0	0	0	0	0	0	0	0	0	0	0	0	0	0	0	0	0	0	0	0	0	0	0	0	0	0	0	0	0	0	0	0	0	0	0	0	0	0	0	0
YBR123C	0	0	0	0	0	0	0	0	0	0	0	0	0	0	0	0	0	0	0	0	0	0	0	0	0	0	0	0	0	0	0	0	0	0	0	0	0	0	0	0	0	0	0	0	0	0	0	0	0
YBR125C	24	4	11	3	8	7	54	109	41	130	46	161	6	0	6	0	3	0	28	92	23	76	9	57	1	0	4	0	1	0	4	117	4	55	3	96	14	24	23	19	12	51	17	7	17	16	13	14	24
YBR126C	104	91	74	170	30	107	70	84	51	87	78	130	101	504	189	256	116	292	62	354	33	345	13	255	18	128	8	200	19	99	17	218	17	108	16	190	56	42	49	35	41	66	198	71	122	139	113	184	45
YBR127C	61	6	52	24	26	7	52	16	72	17	77	15	34	17	43	11	29	11	75	15	28	14	16	6	9	0	9	0	7	3	12	27	9	10	3	37	44	12	41	11	45	13	103	14	63	26	70	21	35
YBR128C	47	12	28	18	12	8	99	145	68	120	78	175	40	87	60	27	30	44	81	90	29	109	19	41	17	245	7	213	18	220	11	122	5	51	8	83	41	38	28	42	28	98	92	16	48	33	56	55	17
YBR129C	314	231	175	339	99	237	129	153	87	146	107	190	200	668	350	282	205	401	90	88	27	94	38	75	35	249	21	319	29	358	50	600	31	279	27	506	155	259	126	312	120	448	344	160	187	245	211	288	164
YBR130C	249	239	147	390	76	251	180	297	154	310	157	379	213	1460	388	557	288	640	119	528	49	504	36	432	43	343	22	380	22	232	45	554	33	296	20	533	150	188	125	226	91	309	290	111	180	202	199	214	167
YBR133C_1	222	151	135	201	85	136	94	193	74	199	88	241	37	81	42	42	36	43	11	271	34	249	22	160	38	929	23	1014	26	714	46	644	44	292	23	587	126	158	90	152	115	263	304	133	156	187	200	224	251
YBR137W	170	91	84	164	61	95	174	398	163	409	197	507	217	1008	314	531	183	751	62	255	63	247	38	247	26	271	17	260	20	194	30	491	19	223	17	480	94	140	97	146	87	257	337	170	184	309	247	280	161
YBR138C	247	126	109	214	67	139	157	249	123	275	171	335	139	563	264	384	178	372	159	248	45	293	44	264	41	179	21	222	22	209	36	297	20	149	8	286	145	148	129	185	136	319	338	117	170	170	174	215	143
YBR140C	4	0	0	0	1	0	26	10	14	8	23	15	0	0	1	0	0	0	0	11	1	13	5	18	1	0	0	0	0	0	0	0	1	0	0	0	1	0	2	0	4	1	2	1	1	0	2	0	29
YBR141C	267	262	180	422	86	206	221	424	202	437	255	576	33	0	53	0	43	0	145	877	89	809	43	630	38	368	25	362	39	406	48	549	38	295	19	555	130	192	111	159	129	265	404	165	210	285	252	311	142
YBR142W	0	0	0	0	0	0	0	0	0	0	0	0	0	0	0	0	0	0	0	0	0	0	0	0	0	0	0	0	0	0	0	0	0	0	0	0	0	0	0	0	0	0	0	0	0	0	0	0	0
YBR143C	23	8	18	4	15	5	22	24	22	10	28	18	7	0	22	0	10	0	0	28	3	24	1	15	17	50	5	33	9	36	7	53	10	30	6	70	26	14	26	18	30	24	97	11	65	17	42	23	18
YBR145W	375	365	213	565	132	310	164	299	141	336	179	362	310	1441	493	765	395	872	102	292	42	175	33	135	43	378	24	313	36	255	54	799	48	461	32	898	185	251	174	278	147	455	441	245	290	355	345	435	208
YBR147W	223	174	155	271	86	149	169	362	146	405	196	505	146	680	237	273	177	384	157	400	57	313	32	411	47	528	26	860	35	524	59	651	28	359	31	626	115	140	93	130	83	184	367	170	220	251	245	297	173
YBR148W	40	31	20	55	14	24	36	63	40	57	49	76	4	0	4	0	3	0	18	319	21	246	13	197	6	112	7	81	10	68	7	120	10	46	2	96	17	0	13	0	12	0	27	18	15	27	33	24	16
YBR149W	209	200	160	311	87	176	186	382	131	404	178	485	29	2	50	5	36	1	204	447	52	363	39	321	39	212	25	297	22	148	37	608	37	320	24	557	128	157	100	151	104	251	360	201	231	329	249	353	101
YBR151W	220	203	147	354	75	176	156	290	131	312	147	360	219	1001	382	635	248	697	118	483	73	488	30	395	43	448	26	462	19	411	32	429	27	215	16	478	155	180	118	175	101	339	372	201	198	285	232	325	40
YBR152W	257	224	182	312	86	204	150	276	112	269	122	357	70	197	104	117	71	152	130	418	56	364	28	376	43	366	18	542	21	368	37	452	37	282	36	499	148	210	120	208	103	351	380	200	236	280	231	344	167
YBR153W	0	0	0	0	0	0	0	0	0	0	0	0	0	0	0	0	0	0	0	0	0	0	0	0	0	0	0	0	0	0	0	0	0	0	0	0	0	0	0	0	0	0	0	0	0	0	0	0	0
YBR154C	17	18	19	33	9	17	10	16	9	18	13	15	25	152	49	97	39	107	6	86	6	59	3	65	2	6	0	1	2	7	3	24	0	18	1	16	9	5	2	4	10	6	15	21	12	15	19	23	3
YBR155W	232	163	132	264	64	168	207	362	206	386	232	551	293	1630	509	779	302	883	284	1337	106	939	61	1067	44	372	17	426	36	309	62	797	56	466	36	844	129	184	112	177	120	318	319	169	197	275	229	286	204
YBR156C	129	75	102	143	58	67	124	214	86	210	120	271	86	374	106	215	122	256	110	171	40	169	21	137	37	221	14	191	14	260	40	303	22	172	8	314	123	182	94	191	106	289	238	88	144	116	148	141	87
YBR157C	255	225	145	377	76	233	188	255	198	284	193	381	55	182	63	44	41	65	183	797	64	799	47	683	30	371	26	363	34	325	21	634	19	296	12	714	132	54	108	53	82	99	353	169	175	249	233	328	98
YBR160W	193	190	130	251	63	159	139	163	127	155	120	208	88	872	147	381	95	590	61	1016	51	1038	33	982	30	354	15	225	22	364	38	414	28	178	15	362	73	72	89	69	93	133	269	121	179	192	190	207	115
YBR161W	119	90	62	117	36	79	99	200	92	207	105	295	12	0	21	0	18	1	28	157	43	169	25	197	19	142	15	99	17	118	27	423	32	220	24	391	76	131	67	133	60	218	164	90	84	124	105	124	27
YBR162W-A	0	0	0	0	0	0	0	0	0	0	0	0	0	0	0	0	0	0	0	0	0	0	0	0	0	0	0	0	0	0	0	0	0	0	0	0	0	0	0	0	0	0	0	0	0	0	0	0	0
YBR163W	124	147	73	178	33	104	67	161	66	145	80	211	9	0	22	0	16	0	39	98	19	49	25	33	14	93	14	78	8	50	16	138	4	68	11	143	82	162	85	205	71	266	168	81	101	142	124	136	48
YBR165W	365	373	230	547	137	360	244	467	212	458	254	660	260	1220	410	569	264	694	162	834	79	530	55	568	56	530	43	577	45	418	67	733	56	368	36	743	144	177	108	187	153	317	464	241	272	328	294	411	190
YBR166C	237	162	145	267	81	139	161	287	129	230	175	354	66	200	94	89	71	115	117	566	57	484	47	256	27	177	25	198	18	167	60	536	44	273	24	587	131	149	88	154	89	230	315	141	207	239	216	272	74
YBR167C	248	227	151	390	81	235	173	420	149	383	164	543	366	1752	511	943	315	1213	158	781	49	659	36	570	33	248	25	367	28	221	57	711	42	413	25	789	147	195	95	229	105	330	389	241	231	342	279	433	152
YBR168W	0	0	0	0	0	0	0	0	0	0	0	0	0	0	0	0	0	0	0	0	0	0	0	0	0	0	0	0	0	0	0	0	0	0	0	0	0	0	0	0	0	0	0	0	0	0	0	0	0
YBR169C	0	0	2	0	0	0	0	0	3	0	0	0	0	0	2	0	1	0	0	0	0	0	0	0	0	0	1	0	0	0	0	4	0	4	0	3	1	0	1	0	1	0	1	0	1	0	5	0	2
YBR171W	312	279	188	455	96	252	202	316	174	335	214	487	23	0	60	0	39	0	177	839	87	778	45	733	43	253	25	341	34	294	48	507	33	291	35	556	144	184	135	221	119	397	364	179	221	277	254	301	143
YBR175W	155	147	98	209	57	113	58	90	61	84	54	135	23	0	46	0	22	0	11	24	12	54	10	28	24	201	15	260	24	152	23	323	19	182	6	342	94	83	69	84	72	123	268	129	210	211	199	228	118
YBR176W	230	216	134	323	75	216	44	101	35	78	48	131	325	2298	501	1397	363	1591	74	537	23	444	9	328	38	450	27	552	30	517	59	754	57	435	31	805	111	188	107	189	98	288	495	286	261	486	319	542	216
YBR177C	205	166	143	277	71	151	168	421	153	424	179	510	97	420	126	208	107	309	150	1082	72	801	48	626	43	522	23	562	29	471	45	513	22	261	20	508	105	137	97	145	109	223	340	169	188	236	199	284	76
YBR179C	275	75	168	129	100	65	125	147	139	138	153	178	39	1	52	0	35	0	111	112	51	88	39	76	35	28	27	23	21	16	50	199	41	123	18	205	131	98	115	121	99	179	350	66	231	104	257	111	64
YBR180W	207	115	110	168	50	111	126	242	102	269	109	354	148	464	259	295	208	298	70	412	51	281	33	271	67	1331	44	1471	38	983	34	372	26	189	17	467	143	188	128	167	143	323	486	175	244	242	300	283	214
YBR181C	48	39	19	56	20	34	30	75	19	61	29	104	64	254	103	83	72	141	29	125	6	157	3	122	8	30	2	33	8	45	13	170	15	87	5	155	16	17	17	15	16	37	60	47	42	95	47	71	34
YBR182C-A	13	4	11	11	1	4	52	104	50	99	50	174	3	0	3	0	2	0	23	485	38	225	14	358	4	50	1	31	2	27	2	28	4	7	0	27	10	11	12	16	7	30	18	3	9	8	8	7	4
YBR185C	191	161	148	225	61	161	194	382	168	394	193	452	182	1260	312	700	219	806	194	1162	64	803	60	686	29	350	24	444	29	307	37	506	31	267	28	548	118	134	110	161	89	252	321	113	188	207	201	244	119
YBR187W	0	0	0	0	0	0	0	0	0	0	0	0	0	0	0	0	0	0	0	0	0	0	0	0	0	0	0	0	0	0	0	0	0	0	0	0	0	0	0	0	0	0	0	0	0	0	0	0	0
YBR189W	169	54	135	71	67	32	158	119	144	93	190	122	56	23	94	21	59	29	74	34	59	54	33	17	26	27	21	14	28	67	52	210	34	121	22	281	157	72	106	82	105	116	443	92	234	142	306	148	101
YBR191W	180	167	95	206	75	136	123	191	92	188	125	252	28	0	44	0	15	0	39	47	33	35	15	34	27	28	11	45	14	32	26	348	19	187	8	384	117	110	84	112	72	143	262	132	159	147	167	195	65
YBR192W	0	0	0	0	0	0	0	0	0	0	0	0	0	0	0	0	0	0	0	0	0	0	0	0	0	0	0	0	0	0	0	0	0	0	0	0	0	0	0	0	0	0	0	0	0	0	0	0	0
YBR194W	4	0	3	0	2	0	55	96	43	91	56	135	0	0	3	0	5	0	146	470	21	305	15	153	1	0	2	0	1	0	3	71	2	36	2	66	11	21	11	35	13	47	13	7	11	9	13	17	2
YBR196C	138	66	73	120	39	57	137	247	123	230	147	330	31	0	29	0	28	0	118	49	57	65	30	51	20	133	15	188	13	117	21	268	16	135	10	233	131	164	102	204	90	314	230	52	137	125	154	156	165
YBR197C	0	0	0	0	0	0	0	0	0	0	0	0	0	0	0	0	0	0	0	0	0	0	0	0	0	0	0	0	0	0	0	0	0	0	0	0	0	0	0	0	0	0	0	0	0	0	0	0	0
YBR198C	184	149	105	215	57	133	92	137	54	118	92	171	16	0	16	0	10	0	33	231	35	208	19	195	21	306	22	337	16	290	28	287	19	154	10	289	100	125	70	128	77	278	184	67	107	92	102	100	21
YBR199W	108	96	83	134	41	88	82	157	68	167	98	213	128	452	183	311	133	254	57	23	24	89	20	9	32	365	22	354	35	297	28	395	24	217	22	451	83	105	67	86	98	200	239	121	148	169	151	207	65
YBR200W	199	112	93	192	59	117	147	266	122	252	132	343	101	555	181	220	121	305	49	736	49	477	28	436	58	925	26	1022	25	774	53	443	33	254	16	502	152	178	116	217	123	336	366	134	240	270	221	291	281
YBR200W-A	230	258	156	370	65	227	197	465	141	416	178	605	27	0	48	1	43	0	117	1490	70	1058	50	1098	55	916	21	1038	42	967	45	604	38	329	22	636	110	158	106	173	121	239	277	151	156	246	196	287	194
YBR201W	191	127	116	213	65	111	198	312	155	307	197	444	177	796	288	432	196	510	255	1277	84	1232	48	1141	80	1306	42	1609	26	1108	40	546	31	269	24	622	185	338	155	398	140	571	444	180	246	306	259	336	338
YBR204C	190	184	100	272	54	163	136	346	108	314	129	475	153	680	208	347	163	494	97	935	54	652	23	657	58	556	24	525	25	408	36	441	31	233	14	438	113	151	86	166	91	242	257	95	142	198	157	219	68
YBR205W	129	136	128	209	60	135	168	288	138	264	195	433	136	698	215	331	117	496	60	490	71	294	45	386	19	152	13	181	14	160	30	364	23	197	6	358	107	132	81	154	92	307	241	118	156	189	179	191	164
YBR207W	272	303	156	472	99	256	128	229	119	245	164	336	297	1132	485	586	324	855	107	292	46	313	26	322	40	204	13	229	26	163	40	454	32	205	10	364	132	162	96	175	106	249	358	140	229	265	254	284	164
YBR210W	215	172	117	289	68	191	172	375	165	332	178	505	70	227	127	123	71	85	124	287	68	260	47	199	21	141	22	282	18	184	30	344	21	208	15	415	101	120	105	146	92	209	255	129	155	201	178	240	130
YBR211C	88	73	46	107	31	65	64	125	66	111	76	145	18	0	18	0	10	0	35	100	17	92	7	119	20	73	7	108	11	90	19	318	14	151	15	291	70	135	74	165	49	225	179	72	85	117	127	123	54
YBR214W	228	174	149	274	71	154	102	162	87	142	124	237	136	468	220	235	111	219	46	504	33	467	25	456	56	430	29	539	33	402	50	585	37	336	31	557	179	254	142	278	171	433	563	221	291	344	328	388	135
YBR215W	254	188	166	312	90	183	166	325	167	285	173	350	26	0	56	0	43	0	90	571	62	396	27	391	31	170	18	182	30	183	60	577	33	265	22	551	114	153	97	145	101	244	328	157	190	229	214	264	88
YBR217W	469	459	284	610	151	378	278	546	239	549	316	839	311	1626	472	804	275	956	383	840	92	866	57	880	59	408	38	581	37	309	65	954	60	506	43	1238	222	264	216	346	188	630	554	233	255	323	392	474	252
YBR218C	5	0	8	2	4	2	24	40	14	31	27	46	0	0	2	0	0	0	0	45	11	28	6	6	3	12	1	7	0	16	1	27	0	12	1	19	6	6	7	4	1	1	11	1	9	5	6	3	2
YBR219C	0	0	0	0	0	0	0	0	0	0	0	0	0	0	0	0	0	0	0	0	0	0	0	0	0	0	0	0	0	0	0	0	0	0	0	0	0	0	0	0	0	0	0	0	0	0	0	0	0
YBR220C	27	33	16	59	10	24	19	40	24	42	22	51	2	0	11	0	6	0	37	59	11	47	4	87	6	12	0	9	4	13	8	79	4	45	4	85	17	12	11	11	9	13	28	7	22	26	24	23	8
YBR221C	152	96	120	159	63	102	104	120	99	103	126	137	123	562	209	300	140	281	124	299	47	266	30	315	32	118	13	54	24	120	23	363	30	218	24	389	108	130	74	122	80	241	388	181	207	271	257	303	64
YBR221W-A	196	233	139	346	77	191	89	121	73	143	75	147	117	290	170	111	109	124	100	674	28	373	25	470	21	308	26	312	20	266	30	330	19	144	14	307	93	105	86	123	76	181	253	131	123	179	177	227	95
YBR222C	0	0	0	0	0	0	0	0	0	0	0	0	0	0	0	0	0	0	0	0	0	0	0	0	0	0	0	0	0	0	0	0	0	0	0	0	0	0	0	0	0	0	0	0	0	0	0	0	0
YBR225W	184	125	158	194	52	88	52	87	38	75	53	135	13	0	30	0	25	0	71	106	8	84	16	75	20	185	16	303	10	181	28	376	24	203	16	435	106	67	66	114	74	166	236	84	110	111	151	134	65
YBR229C	246	150	129	209	70	128	136	247	119	236	147	320	247	827	379	409	233	445	135	142	58	140	32	103	48	290	28	442	24	296	35	430	35	260	25	474	158	122	126	162	109	326	343	117	225	191	255	202	81
YBR230C	172	66	118	106	59	71	196	107	143	127	171	156	28	15	46	15	58	14	84	498	77	273	44	226	28	127	25	74	23	123	33	237	24	157	15	228	66	28	64	18	85	43	257	52	174	88	184	99	121
YBR230W-A	163	178	108	286	63	127	68	172	70	178	77	211	89	929	197	438	122	521	106	606	42	334	14	438	20	136	12	139	13	102	20	340	15	174	18	362	74	83	55	95	80	165	245	97	155	199	201	236	205
YBR233W	245	167	141	289	80	176	166	361	141	405	171	510	27	28	42	7	26	7	97	639	73	639	34	480	38	378	30	346	21	274	60	531	51	284	29	466	176	404	163	426	165	818	385	123	231	211	260	254	165
YBR234C	247	179	151	335	88	197	111	250	116	274	127	381	170	894	276	416	145	535	93	513	46	524	31	448	51	333	33	532	31	317	57	636	29	311	26	592	164	204	137	212	133	357	361	180	211	298	242	330	175
YBR236C	287	316	179	463	108	268	28	54	25	72	35	71	169	783	204	345	136	332	0	198	9	107	7	84	36	353	26	314	26	269	58	898	50	443	30	877	182	240	150	278	155	475	412	189	227	275	280	324	115
YBR237W	0	0	0	0	0	0	0	0	0	0	0	0	0	0	0	0	0	0	0	0	0	0	0	0	0	0	0	0	0	0	0	0	0	0	0	0	0	0	0	0	0	0	0	0	0	0	0	0	0
YBR239C	150	93	111	135	52	73	84	116	78	138	94	180	147	595	207	272	129	336	6	59	28	70	16	39	33	90	15	158	20	116	45	558	29	289	20	558	85	141	100	150	93	242	357	151	181	250	200	226	85
YBR243C	0	0	0	0	0	0	0	0	0	0	0	0	0	0	0	0	0	0	0	0	0	0	0	0	0	0	0	0	0	0	0	0	0	0	0	0	0	0	0	0	0	0	0	0	0	0	0	0	0
YBR244W	148	131	88	188	43	95	117	189	112	222	147	316	119	643	182	361	104	395	159	397	40	477	23	378	21	223	12	284	13	222	20	406	17	227	9	544	86	100	67	145	45	258	192	114	99	95	139	141	58
YBR247C	0	0	0	0	0	0	0	0	0	0	0	0	0	0	0	0	0	0	0	0	0	0	0	0	0	0	0	0	0	0	0	0	0	0	0	0	0	0	0	0	0	0	0	0	0	0	0	0	0
YBR249C	196	132	116	207	55	134	244	497	204	464	220	579	99	241	204	128	108	113	258	632	86	567	53	677	32	220	18	154	37	198	52	503	35	271	22	532	115	149	88	143	97	225	277	140	168	174	207	270	148
YBR250W	246	169	171	230	72	179	167	300	141	293	149	413	391	2173	502	1013	326	1139	142	724	57	675	37	936	36	782	44	655	40	433	45	520	38	253	22	507	153	169	120	175	122	275	440	197	230	302	261	347	87
YBR251W	199	158	113	258	80	131	149	333	134	347	172	439	67	212	114	137	70	138	153	236	47	198	39	170	44	221	26	206	23	269	43	497	34	300	14	624	116	131	73	151	92	236	304	141	159	174	181	212	127
YBR253W	253	285	179	432	90	261	231	444	218	416	251	570	109	527	184	246	124	287	218	796	87	628	60	671	44	340	29	252	28	226	39	504	34	237	26	471	120	136	100	149	86	236	321	170	180	290	203	300	119
YBR254C	383	349	265	535	142	356	268	591	277	634	297	838	591	3019	948	1587	685	1831	146	1058	104	792	64	649	71	821	43	888	42	643	86	881	40	424	39	835	198	230	173	279	152	459	557	265	305	463	369	489	220
YBR257W	276	225	169	343	94	203	226	458	164	468	261	617	143	768	213	328	171	387	161	640	75	600	51	814	77	681	41	658	37	467	71	792	57	459	36	798	153	169	139	178	136	243	452	234	260	374	285	401	242
YBR258C	198	177	134	300	67	187	145	308	138	272	179	388	167	973	266	442	159	530	79	510	63	500	40	446	39	274	25	315	32	184	41	495	33	248	17	438	105	107	79	101	77	165	310	115	165	215	190	232	125
YBR259W	162	92	78	116	62	69	136	227	115	238	121	297	25	0	46	0	34	0	172	311	42	192	33	157	22	154	9	144	20	162	38	299	22	171	21	308	129	106	91	124	76	181	276	92	159	122	174	141	57
YBR261C	4	0	6	0	2	0	71	141	67	126	71	133	0	0	4	0	3	0	103	195	37	225	18	186	4	27	2	36	3	9	2	46	3	32	2	55	9	5	5	2	7	7	16	1	5	3	4	4	1
YBR262C	323	216	200	351	99	183	85	159	93	152	105	215	215	945	350	491	239	559	42	166	27	168	21	117	87	1987	47	2156	60	1517	61	1043	49	532	33	1184	211	472	229	454	199	844	556	296	302	437	370	532	251
YBR263W	205	153	98	233	82	121	106	127	87	149	92	232	32	0	47	0	20	0	111	205	23	92	12	132	35	303	18	308	20	288	28	422	27	185	22	466	123	133	113	154	81	288	345	128	194	167	240	249	56
YBR264C	197	204	121	318	63	176	144	233	104	236	139	342	97	276	125	167	92	164	56	835	54	766	36	659	43	346	19	439	22	249	35	403	37	240	18	446	103	139	111	156	113	312	271	140	144	195	162	205	122
YBR265W	362	426	243	594	143	370	280	656	256	641	334	829	133	490	279	281	143	318	248	898	112	769	78	487	72	530	25	507	42	423	65	1044	59	552	42	981	189	226	181	265	171	386	573	274	341	477	396	505	397
YBR267W	136	122	77	176	51	113	109	202	107	195	116	284	16	0	30	0	22	0	122	349	42	312	20	247	16	221	19	169	20	187	25	353	17	180	14	357	94	117	71	143	68	206	224	115	123	164	136	189	122
YBR268W	113	127	68	179	58	104	73	193	62	178	85	277	19	0	25	0	25	0	33	73	34	119	22	98	31	583	14	813	27	401	31	485	24	230	17	457	105	173	89	227	95	335	256	132	171	207	167	233	128
YBR269C	0	0	0	0	0	0	0	0	0	0	0	0	0	0	0	0	0	0	0	0	0	0	0	0	0	0	0	0	0	0	0	0	0	0	0	0	0	0	0	0	0	0	0	0	0	0	0	0	0
YBR271W	225	190	128	249	81	137	146	295	129	258	185	338	154	602	194	444	166	423	85	425	53	263	40	279	26	256	17	190	24	145	43	465	32	227	19	445	96	80	74	98	65	147	294	134	154	167	173	233	91
YBR274W_1	89	56	55	87	28	50	83	87	59	128	73	160	23	0	22	0	9	0	30	203	21	70	14	113	25	261	8	271	12	207	20	311	11	139	20	285	72	108	67	120	63	217	169	43	80	84	98	128	90
YBR274W_2	107	97	62	160	25	86	73	123	64	113	87	197	14	0	13	0	8	0	85	273	24	219	9	188	21	191	15	224	10	248	18	174	13	111	7	195	49	42	43	47	42	93	89	31	48	81	54	81	22
YBR276C	82	54	71	99	40	62	113	183	89	166	123	256	97	609	153	246	119	313	46	143	28	149	31	237	20	193	12	240	21	256	20	232	16	126	5	256	59	68	61	86	78	128	103	42	60	52	73	57	82
YBR278W	404	473	279	658	142	437	154	358	146	331	200	450	127	500	209	336	149	342	106	460	57	470	53	475	49	181	22	287	35	339	57	772	36	424	33	785	156	204	143	211	140	309	405	233	289	360	300	406	158
YBR279W	207	85	130	141	63	80	82	196	66	156	73	213	190	9608	281	3931	205	5244	27	1275	20	1413	14	1619	73	54591	44	56059	41	45992	61	789	36	313	23	675	179	174	127	198	106	325	407	192	220	305	259	379	121
YBR281C	213	123	136	188	64	129	170	257	137	244	169	350	161	930	270	423	185	441	116	306	43	186	42	248	44	372	35	307	22	228	48	430	41	218	30	401	97	97	110	82	107	185	287	111	163	160	205	244	147
YBR282W	112	48	86	77	52	39	189	387	179	386	205	538	317	881	466	413	345	530	166	579	76	247	60	357	48	572	31	569	36	531	40	544	37	273	20	542	161	297	153	338	124	558	300	94	169	176	161	230	154
YBR283C	197	146	151	218	72	143	134	202	147	178	158	242	57	150	79	53	49	75	76	167	45	130	28	132	21	118	10	76	19	68	39	371	26	189	15	401	97	129	93	141	92	231	265	131	140	197	172	196	74
YBR284W	204	121	106	213	73	104	100	171	77	151	93	188	161	908	271	430	175	527	93	194	32	109	18	189	26	163	13	157	11	191	51	304	24	149	17	300	87	83	99	82	98	168	263	91	158	114	184	149	131
YBR285W	225	231	134	358	82	223	205	486	183	438	251	551	655	4744	868	2553	653	3136	205	1511	76	1069	59	1255	43	966	34	1152	26	1019	43	580	27	327	25	582	117	180	113	164	80	239	323	226	219	317	226	365	232
YBR286W	237	139	122	246	65	142	147	199	111	229	150	269	101	481	171	371	97	307	113	270	41	256	33	172	21	234	19	284	25	224	23	344	21	208	15	335	84	100	68	103	66	146	311	120	148	172	192	191	59
YBR287W	0	0	0	0	0	0	0	0	0	0	0	0	0	0	0	0	0	0	0	0	0	0	0	0	0	0	0	0	0	0	0	0	0	0	0	0	0	0	0	0	0	0	0	0	0	0	0	0	0
YBR289W	0	0	0	0	0	0	0	0	0	0	0	0	0	0	0	0	0	0	0	0	0	0	0	0	0	0	0	0	0	0	0	0	0	0	0	0	0	0	0	0	0	0	0	0	0	0	0	0	0
YBR290W	96	41	63	75	27	36	61	132	50	98	72	123	72	154	127	118	90	107	47	58	27	21	6	43	26	192	16	273	13	160	17	169	12	96	3	148	103	62	62	64	52	105	170	54	99	89	144	106	77
YBR291C	155	158	135	212	48	143	102	219	92	198	127	323	163	610	213	318	166	378	44	319	35	364	34	455	22	335	35	374	17	297	40	430	28	214	25	398	92	117	80	112	95	173	299	147	151	230	209	288	151
YBR294W	201	105	120	175	77	80	99	208	106	219	117	273	166	718	219	332	133	446	109	441	29	336	24	334	30	158	19	211	15	165	36	289	34	173	20	340	109	88	74	104	88	179	260	78	155	120	169	131	59
YBR297W	194	134	112	174	58	122	138	316	145	277	158	376	182	626	252	350	180	371	102	522	59	414	31	461	33	223	20	264	26	270	28	344	30	204	16	432	154	222	142	232	111	410	313	113	207	203	203	242	131
YBR298C	7	0	5	0	3	0	3	13	5	5	7	8	1	0	3	0	1	0	0	0	1	0	0	0	8	99	3	48	2	66	0	1	0	0	0	0	6	0	1	0	0	0	12	2	10	1	9	1	0
YBR299W	108	82	59	142	32	85	63	118	55	116	60	176	13	0	23	0	16	0	83	177	22	115	10	143	8	102	4	121	11	70	9	171	7	66	10	160	43	37	36	45	38	77	135	49	76	72	99	102	37
YBR301W	228	208	152	271	81	171	132	252	107	269	135	348	143	653	208	375	136	387	52	254	44	153	25	93	37	352	26	423	18	311	45	624	31	344	18	669	115	161	99	163	83	281	293	112	181	232	205	222	233
YCL001W	165	124	107	195	58	113	85	206	84	197	98	255	181	701	301	347	213	406	70	418	34	313	20	295	27	459	17	662	26	321	31	354	23	202	15	348	99	130	71	110	71	224	244	96	147	199	166	206	71
YCL001W-A	120	64	53	96	30	63	68	124	56	131	79	160	108	587	176	291	129	300	24	223	21	80	22	82	18	139	5	240	10	115	14	215	10	98	8	217	57	85	54	75	38	135	102	75	71	85	71	71	49
YCL001W-B	259	294	152	460	106	286	210	523	186	561	237	757	86	564	135	256	115	302	300	1843	80	1518	41	1474	34	257	16	363	16	278	54	559	36	296	25	505	132	188	123	205	90	320	343	184	195	274	233	326	165
YCL002C	153	99	111	160	55	80	147	228	131	251	154	298	33	0	43	0	28	0	86	441	52	289	35	262	42	228	21	366	17	229	37	396	29	200	20	466	101	192	101	192	92	311	331	121	179	197	193	241	107
YCL004W	54	52	46	77	27	47	57	85	43	98	66	83	9	0	13	0	6	0	87	185	15	224	12	215	11	261	7	156	13	146	8	142	10	82	4	144	32	35	26	42	37	63	67	28	59	50	62	64	55
YCL005W-A	0	0	0	0	0	0	0	0	0	0	0	0	0	0	0	0	0	0	0	0	0	0	0	0	0	0	0	0	0	0	0	0	0	0	0	0	0	0	0	0	0	0	0	0	0	0	0	0	0
YCL009C	0	0	0	0	0	0	0	0	0	0	0	0	0	0	0	0	0	0	0	0	0	0	0	0	0	0	0	0	0	0	0	0	0	0	0	0	0	0	0	0	0	0	0	0	0	0	0	0	0
YCL010C	114	113	75	144	33	93	76	167	58	156	87	213	101	462	120	146	72	144	48	171	26	188	13	185	20	180	15	177	15	242	19	286	18	112	7	220	72	120	58	142	68	215	152	83	90	124	109	152	101
YCL011C	46	37	40	57	21	30	45	93	36	91	45	110	157	801	231	354	162	380	33	112	18	64	12	85	14	122	6	88	4	107	4	85	5	43	0	78	27	17	21	26	25	49	73	36	47	52	59	51	26
YCL016C	64	77	59	116	31	78	52	102	47	114	52	146	69	464	118	257	78	299	120	361	24	246	10	319	14	213	7	199	8	133	21	150	11	87	3	157	43	41	29	38	21	73	93	59	38	62	63	86	25
YCL017C	39	24	26	34	12	17	10	28	14	33	16	36	8	19	16	0	14	8	0	12	4	3	4	11	5	37	4	81	8	80	11	140	7	82	8	143	24	4	18	13	27	19	63	32	33	48	58	49	46
YCL025C	170	120	90	216	58	122	99	139	87	153	75	217	12	0	35	0	18	0	81	425	38	191	22	267	15	136	12	145	12	87	30	326	22	161	7	252	82	72	72	75	55	117	186	72	118	126	124	113	44
YCL026C-A	209	74	112	106	64	78	162	234	146	250	177	385	15	0	24	0	13	0	95	960	57	650	31	588	61	1826	30	2042	36	1791	41	332	32	127	24	276	127	119	100	105	117	196	219	54	111	121	151	122	325
YCL029C	95	19	58	43	34	17	37	49	26	38	34	41	29	68	46	18	33	21	5	0	12	0	9	0	14	23	10	7	10	6	15	67	12	32	9	72	68	45	76	51	62	99	224	47	141	68	154	67	35
YCL030C	50	46	28	55	20	35	15	52	20	52	23	51	5	0	17	0	10	2	6	26	5	6	4	14	10	63	6	70	9	44	8	142	9	53	3	148	28	18	30	10	33	23	119	39	78	47	67	73	31
YCL031C_2	318	100	238	201	132	115	108	236	96	250	120	332	200	4703	332	1973	250	2672	46	1667	52	1721	30	2034	181	91251	77	90394	82	76765	91	932	61	395	36	823	283	242	226	264	230	463	696	256	417	410	452	444	198
YCL033C	0	0	0	0	0	0	0	0	0	0	0	0	0	0	0	0	0	0	0	0	0	0	0	0	0	0	0	0	0	0	0	0	0	0	0	0	0	0	0	0	0	0	0	0	0	0	0	0	0
YCL035C	140	90	100	131	52	78	136	202	119	246	142	320	236	1193	264	524	220	620	150	881	58	471	22	437	45	572	21	743	28	536	40	486	27	236	21	467	104	107	95	126	82	179	309	168	151	231	198	313	180
YCL036W	114	103	49	173	37	77	35	53	35	52	31	79	12	0	20	0	5	0	85	212	8	119	4	193	2	156	5	66	10	97	11	279	11	107	9	409	46	16	29	22	19	61	163	74	75	66	101	113	20
YCL038C	29	5	35	9	11	1	28	47	22	46	29	58	7	0	17	0	14	0	8	24	13	6	6	3	13	91	10	74	11	88	15	133	13	73	5	117	43	48	39	52	42	82	64	18	36	33	60	44	23
YCL042W	201	179	153	327	62	218	87	238	100	283	122	283	243	2009	351	1016	216	1107	98	286	37	236	24	284	37	280	17	541	21	408	45	734	33	344	22	652	153	361	133	336	108	578	346	153	212	305	225	343	127
YCL044C	330	85	182	124	127	98	126	320	104	292	127	397	614	49643	1115	25285	641	25431	189	8995	28	9083	16	9789	186	175302	63	192093	48	184663	58	1350	58	600	43	1704	218	167	180	341	117	714	425	297	254	251	296	554	124
YCL047C	114	76	84	100	49	58	116	117	76	118	104	179	93	207	158	121	118	139	142	345	42	307	34	224	35	426	33	420	33	442	22	220	15	145	14	307	101	114	98	104	101	128	173	67	109	104	143	141	64
YCL050C	349	327	236	499	118	271	252	430	223	396	217	527	195	827	268	452	201	438	178	791	102	523	56	448	81	1137	53	1615	55	1218	80	1240	68	635	43	1234	252	409	200	443	197	660	581	298	342	476	383	545	269
YCL051W	49	8	25	11	11	6	144	309	131	300	146	371	7	0	23	0	11	0	105	510	47	603	43	419	15	489	4	415	9	334	15	130	11	65	5	204	44	43	34	48	29	87	69	24	43	26	49	53	84
YCL052C	293	207	200	339	110	197	144	275	103	277	159	386	187	1259	314	575	230	757	91	503	52	336	24	388	45	314	23	464	33	323	41	501	32	265	25	555	158	188	124	248	124	339	385	174	228	304	292	349	173
YCL054W	0	0	0	0	0	0	0	0	0	0	0	0	0	0	0	0	0	0	0	0	0	0	0	0	0	0	0	0	0	0	0	0	0	0	0	0	0	0	0	0	0	0	0	0	0	0	0	0	0
YCL055W	157	104	84	172	65	114	164	335	131	363	174	465	27	0	25	5	16	0	131	331	55	220	35	213	19	306	20	352	25	380	30	421	29	227	13	417	88	150	82	144	68	302	191	70	110	136	118	178	111
YCL056C	361	307	241	512	108	354	333	612	303	609	339	865	278	1170	506	680	298	841	161	988	122	904	73	807	66	815	55	732	55	514	84	1188	81	608	42	1299	169	247	182	272	164	470	460	245	266	389	329	488	256
YCL057C-A	304	262	184	423	97	290	134	308	140	312	161	421	189	842	289	425	209	531	127	630	66	456	32	483	36	257	15	177	18	256	40	526	38	270	24	495	99	103	90	109	94	207	422	177	210	302	250	327	114
YCL059C	0	0	0	0	0	0	0	0	0	0	0	0	0	0	0	0	0	0	0	0	0	0	0	0	0	0	0	0	0	0	0	0	0	0	0	0	0	0	0	0	0	0	0	0	0	0	0	0	0
YCL061C_1	125	63	69	72	37	47	35	87	33	75	40	99	97	152	132	146	91	139	11	90	7	66	11	136	28	123	12	115	17	193	26	241	16	84	10	182	89	110	93	132	68	159	174	27	93	49	148	68	92
YCL061C_2	132	70	77	99	40	56	28	62	32	70	51	84	82	290	109	182	95	250	10	149	14	103	8	144	11	157	13	115	10	52	13	83	11	50	6	81	56	20	48	27	42	45	134	25	94	54	87	63	45
YCL063W	143	82	105	119	44	60	189	364	166	418	228	549	429	2390	638	1216	440	1428	126	653	80	686	42	602	41	305	11	248	22	269	24	334	20	203	14	399	160	200	97	233	107	354	299	139	154	180	155	209	78
YCL064C	179	160	145	237	74	127	181	262	138	266	153	347	193	1271	298	616	233	688	240	894	54	651	44	584	49	250	27	431	19	266	47	554	25	287	16	532	145	149	90	134	92	240	361	151	198	241	239	315	203
YCL069W	17	4	8	12	1	5	10	37	12	41	22	57	5	0	4	0	1	0	0	43	3	62	6	12	5	56	2	59	4	64	5	62	3	24	4	70	14	11	8	8	13	10	51	26	27	36	27	45	4
YCR002C	236	225	159	351	67	222	230	404	222	460	266	569	32	1	52	1	43	0	189	814	77	723	68	648	37	430	28	280	23	338	42	439	30	266	26	543	122	267	150	289	136	437	289	143	201	247	215	248	105
YCR003W	199	157	115	229	61	149	178	279	140	280	182	377	71	357	148	212	93	209	195	455	66	480	31	467	38	302	21	513	20	263	31	483	20	219	18	454	128	155	113	147	94	267	230	128	145	198	164	215	75
YCR004C	14	1	7	1	3	0	33	33	27	37	34	42	3	0	9	0	3	0	39	27	5	0	6	20	6	22	2	18	4	36	7	42	8	26	8	55	30	32	23	23	34	35	27	8	22	11	27	25	4
YCR005C	207	213	146	369	88	224	191	271	139	302	198	415	347	1297	535	753	396	898	136	1052	70	917	53	780	43	210	13	401	30	235	22	323	28	188	13	325	116	197	96	171	100	301	165	59	99	94	115	113	105
YCR007C	156	105	55	162	52	82	55	73	67	113	78	193	101	495	154	295	68	247	62	268	21	166	9	301	11	212	9	239	10	222	13	233	10	114	10	352	74	62	51	100	34	217	100	50	65	48	83	89	50
YCR008W	102	27	6	39	37	20	9	6	17	17	16	13	4	14	8	42	5	6	20	9	3	6	6	12	4	26	0	19	1	29	2	33	2	4	17	167	21	1	11	11	5	64	32	19	4	5	16	21	2
YCR009C	267	273	171	367	104	267	138	335	126	323	169	460	152	781	258	380	150	421	147	537	47	516	46	415	35	1070	32	1275	36	1124	50	621	32	316	27	593	135	258	126	251	114	415	306	170	194	316	227	321	184
YCR010C	13	0	9	0	4	0	10	4	0	3	5	8	1	0	2	0	4	0	0	0	1	0	3	0	0	0	3	0	3	0	3	20	1	3	1	9	11	0	9	0	9	0	59	5	24	8	36	9	22
YCR012W	168	149	96	168	64	147	218	281	226	314	225	451	75	232	158	94	109	96	137	200	43	103	30	126	24	98	16	179	15	69	37	331	28	152	22	369	102	58	91	76	62	126	258	101	116	123	178	182	62
YCR015C	35	16	18	21	6	16	34	66	33	51	47	81	46	135	66	68	44	102	21	5	12	9	9	14	12	86	9	156	5	104	8	33	1	30	1	47	14	49	21	52	23	73	36	12	13	12	21	14	9
YCR016W	334	284	227	510	112	304	199	376	173	423	194	557	278	1525	391	754	336	912	89	453	65	459	59	338	44	258	28	309	28	302	58	651	41	309	29	666	98	144	112	168	139	232	402	166	217	283	223	318	95
YCR019W	177	148	123	199	56	118	143	321	124	314	174	391	251	1309	351	607	241	856	239	607	68	484	36	545	27	274	31	449	30	406	33	519	34	246	22	476	98	206	95	184	91	303	267	161	182	319	171	313	149
YCR020C	111	71	71	111	32	66	205	363	156	412	160	433	20	1	40	0	31	0	707	4198	189	2610	79	2919	74	1202	33	1394	33	1013	78	774	39	355	27	739	111	199	91	216	88	360	204	84	105	158	111	158	187
YCR020C-A	114	71	86	136	45	80	173	391	123	368	194	554	104	398	156	234	116	240	212	618	64	532	34	532	41	794	20	990	20	714	34	439	16	182	12	448	115	176	108	168	80	288	218	61	117	169	124	147	113
YCR020W-B	137	102	90	164	58	112	131	228	103	266	126	357	61	155	89	95	71	92	180	650	39	530	37	554	47	783	23	1012	30	687	32	475	20	237	12	496	97	73	76	104	69	156	290	137	177	171	179	237	97
YCR021C	306	233	200	315	93	212	139	178	122	194	152	228	93	254	109	118	79	195	104	447	47	556	33	334	31	282	21	208	21	167	33	253	32	135	20	244	98	126	89	121	83	206	290	111	189	176	216	203	125
YCR023C	0	0	0	0	0	0	0	0	0	0	0	0	0	0	0	0	0	0	0	0	0	0	0	0	0	0	0	0	0	0	0	0	0	0	0	0	0	0	0	0	0	0	0	0	0	0	0	0	0
YCR024C	530	451	261	730	147	443	19	54	17	38	19	49	339	1481	605	920	395	923	38	162	10	107	3	203	67	439	48	506	42	361	113	1229	74	676	45	1237	265	419	197	434	189	684	861	477	509	714	618	847	370
YCR028C	39	22	25	41	14	24	64	114	67	128	68	158	132	415	177	169	109	232	59	70	24	67	12	43	14	81	9	88	12	86	14	81	9	42	6	77	47	57	41	72	30	117	69	34	48	51	50	47	14
YCR028C-A	98	129	64	182	27	128	200	428	150	390	154	523	7	0	5	0	4	0	205	1012	60	897	40	757	13	196	4	276	5	154	10	110	5	48	5	120	19	16	26	20	12	39	28	5	20	14	14	26	13
YCR030C	159	56	79	104	48	73	98	168	105	157	142	207	125	420	179	191	150	226	101	288	35	228	20	162	21	82	14	77	15	50	31	251	28	129	20	279	85	93	76	99	63	156	190	66	103	69	134	105	43
YCR031C	33	2	21	10	12	7	105	134	86	114	120	160	4	0	7	0	4	0	101	32	28	44	30	22	6	14	2	10	3	27	13	52	10	41	7	69	35	17	35	15	20	26	62	11	21	18	39	24	13
YCR035C	290	228	203	310	91	216	206	360	194	402	233	519	61	209	124	119	86	175	130	396	38	298	36	392	37	312	29	362	44	377	51	567	30	282	22	585	177	236	133	237	141	421	445	172	229	228	293	310	210
YCR036W	102	84	54	156	25	79	117	230	89	236	114	355	17	0	8	0	12	0	160	800	56	754	32	754	21	202	9	167	15	137	11	146	12	74	7	171	38	78	50	71	39	124	84	21	40	43	48	53	84
YCR037C	91	57	58	90	34	34	95	144	96	156	97	219	13	0	26	0	16	0	156	283	48	270	30	340	30	315	16	483	15	296	23	376	16	206	12	415	75	91	57	99	64	166	212	72	107	118	131	108	108
YCR043C	265	224	201	364	90	186	189	360	178	320	234	499	88	326	160	108	105	186	102	241	57	220	25	275	97	1088	34	1211	48	1056	76	849	36	511	37	936	217	304	180	298	191	535	532	230	348	345	339	433	153
YCR045C	100	64	71	119	27	73	78	150	72	156	100	182	25	0	27	0	21	0	97	219	34	179	13	123	26	149	19	98	13	127	16	274	19	136	6	255	77	107	70	94	67	152	165	72	115	125	138	129	53
YCR046C	184	147	114	254	59	101	82	134	91	156	99	213	10	0	41	0	36	0	48	72	23	77	21	71	30	232	13	280	17	181	30	422	16	220	19	420	104	130	95	164	94	235	249	121	173	246	205	249	100
YCR047C	82	42	37	65	20	29	39	51	30	32	35	65	71	414	83	122	99	172	0	0	13	0	4	0	9	64	7	62	8	46	9	104	8	37	8	77	37	29	37	34	44	46	60	24	33	30	40	33	71
YCR051W	0	0	0	0	0	0	0	0	0	0	0	0	0	0	0	0	0	0	0	0	0	0	0	0	0	0	0	0	0	0	0	0	0	0	0	0	0	0	0	0	0	0	0	0	0	0	0	0	0
YCR052W	0	0	0	0	0	0	0	0	0	0	0	0	0	0	0	0	0	0	0	0	0	0	0	0	0	0	0	0	0	0	0	0	0	0	0	0	0	0	0	0	0	0	0	0	0	0	0	0	0
YCR053W	132	96	85	153	60	92	99	149	70	181	90	201	34	0	46	0	36	0	46	2703	43	2047	16	2033	35	249	27	355	22	240	24	341	24	157	13	329	129	149	101	165	96	243	256	109	163	140	192	211	92
YCR054C	10	0	6	0	4	0	25	67	25	62	31	74	43	304	61	102	72	183	89	199	9	123	11	64	1	32	4	39	1	15	2	60	5	25	2	61	16	21	11	14	20	26	42	11	23	20	33	35	32
YCR057C	0	0	0	0	0	0	0	0	0	0	0	0	0	0	0	0	0	0	0	0	0	0	0	0	0	0	0	0	0	0	0	0	0	0	0	0	0	0	0	0	0	0	0	0	0	0	0	0	0
YCR059C	191	161	96	253	70	147	122	224	118	238	119	332	156	796	257	361	140	444	118	471	39	296	32	371	37	701	25	1071	23	580	40	525	30	308	30	622	125	123	86	111	88	205	362	195	186	285	264	358	106
YCR060W	171	171	108	275	54	186	79	137	74	155	102	230	210	1078	318	597	164	555	132	506	31	525	19	479	27	643	16	664	21	666	20	345	23	193	19	456	87	122	61	188	44	286	203	98	108	112	143	180	57
YCR061W	183	157	128	265	61	153	125	194	95	179	117	253	268	1829	383	699	277	894	58	295	40	400	29	332	35	425	17	546	22	357	35	381	23	200	21	382	84	71	75	81	69	122	323	127	171	166	192	198	94
YCR065W	247	292	149	315	87	236	71	128	56	140	85	188	165	1879	359	987	173	1052	83	1278	22	1011	10	975	38	1413	22	1254	35	1314	24	176	13	123	13	298	98	51	65	89	61	159	304	100	139	119	211	204	38
YCR067C	110	45	66	34	26	30	59	80	71	90	67	140	89	456	128	134	81	222	67	129	19	108	6	144	22	329	19	396	11	444	20	265	25	125	19	305	102	60	83	132	56	176	190	65	69	55	124	91	42
YCR068W	10	4	8	9	5	2	33	62	35	68	35	111	1	0	7	0	7	0	12	119	9	55	9	104	10	104	2	124	7	118	9	53	1	27	5	38	16	0	11	0	4	0	41	18	23	31	38	35	11
YCR069W	219	152	128	209	76	130	99	148	83	169	107	199	74	51	96	59	68	40	86	537	50	356	21	284	33	239	15	339	26	318	41	511	39	246	15	518	149	289	107	272	101	418	398	181	212	292	249	349	54
YCR071C	83	69	40	119	23	55	13	23	10	25	18	33	12	0	8	0	5	0	6	42	2	26	0	12	9	2971	7	2842	9	2287	16	132	15	69	9	134	26	19	20	30	24	39	91	44	80	59	72	75	41
YCR072C	0	0	0	0	0	0	0	0	0	0	0	0	0	0	0	0	0	0	0	0	0	0	0	0	0	0	0	0	0	0	0	0	0	0	0	0	0	0	0	0	0	0	0	0	0	0	0	0	0
YCR073W-A	173	83	105	187	54	86	106	151	71	124	115	193	26	0	48	0	26	0	70	428	25	348	14	195	38	359	10	357	18	302	18	420	13	199	14	380	107	156	77	157	80	276	366	102	200	173	220	210	150
YCR075C	0	0	0	0	0	0	0	0	0	0	0	0	0	0	0	0	0	0	0	0	0	0	0	0	0	0	0	0	0	0	0	0	0	0	0	0	0	0	0	0	0	0	0	0	0	0	0	0	0
YCR075W-A	237	202	136	342	74	208	200	410	191	357	193	495	161	696	173	404	117	387	192	844	76	821	39	813	34	506	22	489	37	396	48	754	47	353	30	775	125	212	114	206	112	378	350	230	228	354	245	403	161
YCR076C	40	49	33	83	18	33	106	196	108	216	81	257	64	638	125	279	100	246	76	482	45	569	33	488	10	160	6	126	10	131	7	114	11	59	4	132	32	52	25	60	19	107	44	35	28	34	37	48	29
YCR077C	92	22	31	36	39	21	6	10	32	11	30	7	2	0	5	0	6	0	20	97	2	52	3	23	9	16	2	52	0	32	7	74	7	24	10	149	42	7	24	22	3	80	93	24	31	14	57	40	4
YCR079W	108	77	68	113	36	79	44	90	48	94	59	114	102	772	180	310	95	496	71	21	12	56	10	105	12	76	15	55	15	54	20	254	18	152	5	253	72	75	62	80	74	129	224	85	137	146	146	179	154
YCR083W	147	156	101	202	39	136	105	184	72	191	106	245	315	1707	477	804	325	1130	40	143	31	81	8	110	33	277	13	351	15	195	26	456	16	209	15	428	82	115	63	122	63	180	211	120	146	159	165	208	26
YCR084C	3	0	8	0	0	0	2	9	9	10	8	12	2	0	4	0	4	0	0	75	2	72	0	70	2	0	1	0	1	0	1	6	0	12	1	17	11	22	9	18	7	31	21	4	7	3	8	3	29
YCR086W	0	0	0	0	0	0	0	0	0	0	0	0	0	0	0	0	0	0	0	0	0	0	0	0	0	0	0	0	0	0	0	0	0	0	0	0	0	0	0	0	0	0	0	0	0	0	0	0	0
YCR087C-A	154	191	113	264	68	178	58	143	53	129	81	153	261	1346	308	548	259	687	105	370	34	331	13	244	17	87	14	131	21	172	30	461	28	304	20	542	110	227	83	219	73	355	265	176	136	273	177	295	166
YCR088W	141	20	100	34	59	17	34	3	19	7	52	6	18	6	25	11	26	14	8	9	10	4	8	6	15	15	15	6	10	3	20	86	16	34	12	88	78	18	56	18	76	25	204	29	113	41	125	42	46
YCR090C	80	104	57	109	24	80	62	109	55	122	62	155	9	0	8	0	6	0	46	164	11	98	4	116	13	161	5	158	9	158	20	119	14	74	12	170	40	50	26	53	18	79	83	47	51	46	49	77	32
YCR091W	202	194	145	283	69	179	93	263	97	230	124	285	156	804	239	434	135	452	163	590	39	315	36	293	31	405	19	296	21	405	37	441	32	239	27	418	100	86	94	93	94	175	260	115	155	174	205	224	87
YCR092C	0	0	0	0	0	0	0	0	0	0	0	0	0	0	0	0	0	0	0	0	0	0	0	0	0	0	0	0	0	0	0	0	0	0	0	0	0	0	0	0	0	0	0	0	0	0	0	0	0
YCR094W	55	34	34	58	18	28	117	310	119	298	117	353	86	443	107	293	77	330	105	221	35	216	27	200	8	76	7	89	9	80	9	92	8	41	3	99	31	11	15	4	26	14	98	36	71	62	37	55	26
YCR095C	118	58	75	78	37	59	84	202	76	176	98	236	19	0	37	0	21	0	72	620	42	438	21	509	36	300	18	374	23	265	39	492	31	237	21	451	125	121	75	159	86	255	269	100	188	212	190	181	90
YCR095W-A	151	117	94	148	55	122	130	210	117	216	157	378	135	763	203	372	104	423	122	364	19	282	18	391	21	270	9	243	10	281	30	349	18	204	17	529	126	258	116	259	94	441	201	103	78	131	127	183	92
YCR098C	0	0	0	0	0	0	0	0	0	0	0	0	0	0	0	0	0	0	0	0	0	0	0	0	0	0	0	0	0	0	0	0	0	0	0	0	0	0	0	0	0	0	0	0	0	0	0	0	0
YCR099C	252	216	140	340	92	205	169	248	125	217	166	295	222	1091	344	512	256	625	109	630	47	481	44	421	47	398	19	371	35	308	39	627	40	345	26	642	167	215	150	263	156	384	174	81	120	157	114	150	310
YCR100C	32	23	18	37	13	18	39	112	50	102	44	149	9	2	10	7	4	3	30	118	14	107	7	120	6	64	1	102	7	153	15	109	6	37	2	93	20	20	17	35	16	36	43	18	19	30	34	30	4
YCR101C	379	400	208	570	127	363	256	455	199	505	251	689	252	1669	327	755	236	873	101	585	82	491	64	349	77	821	45	1065	35	730	73	947	44	486	38	956	207	340	169	414	131	604	506	305	284	497	361	519	395
YCR102C	0	0	0	0	0	0	0	0	0	0	0	0	0	0	0	0	0	0	0	0	0	0	0	0	0	0	0	0	0	0	0	0	0	0	0	0	0	0	0	0	0	0	0	0	0	0	0	0	0
YCR105W	243	124	144	248	78	121	172	303	140	291	187	387	210	1092	283	561	235	562	130	599	83	466	31	355	41	200	24	450	30	291	59	708	49	364	25	729	126	135	143	154	92	225	480	236	297	365	318	400	194
YCR106W	21	13	17	24	6	6	26	48	25	43	37	58	1	0	3	0	1	0	27	24	7	9	3	8	3	0	2	0	0	0	3	38	2	22	3	30	6	0	2	0	2	0	18	1	7	14	13	17	1
YCR107W	204	202	151	279	72	185	92	161	84	161	104	236	115	465	162	196	143	264	55	259	24	190	14	158	46	319	42	306	31	363	44	540	32	293	25	492	151	235	123	247	114	434	414	212	215	304	226	361	200
YDL001W	162	161	137	267	65	138	138	271	122	256	153	330	84	446	141	217	118	215	81	318	75	216	40	230	22	163	15	139	15	84	40	310	17	138	15	348	78	81	69	88	64	118	215	76	124	92	142	117	114
YDL003W	304	182	183	327	113	192	276	446	232	492	292	577	101	421	161	189	114	247	165	852	100	603	76	404	45	438	25	400	25	319	77	708	61	331	33	748	192	290	168	302	166	549	446	196	248	298	302	337	275
YDL004W	294	284	175	422	86	267	261	479	220	478	277	642	203	1035	325	453	229	550	125	782	93	523	55	644	40	197	17	274	25	289	76	898	43	518	28	994	138	136	118	121	108	196	419	217	234	341	266	418	113
YDL005C	134	90	97	155	61	95	152	284	124	249	139	398	267	1173	402	596	259	636	102	607	59	509	33	436	29	141	11	78	20	136	30	450	22	197	20	408	93	152	69	143	76	257	230	123	121	206	188	219	83
YDL006W	138	118	89	165	46	125	120	196	92	186	96	227	143	631	272	267	143	369	104	194	45	221	16	104	17	111	17	163	15	108	29	412	21	222	21	413	79	39	52	41	63	71	182	76	109	108	135	132	104
YDL007W	274	204	172	325	109	177	131	167	132	194	147	275	172	1164	298	468	148	524	104	803	40	665	12	706	33	345	22	560	29	392	48	496	36	235	18	561	124	98	96	116	76	179	338	121	165	179	210	247	63
YDL008W	305	338	235	445	94	288	181	475	163	466	195	558	252	2065	471	971	300	1213	169	899	80	775	48	804	56	756	30	632	35	513	47	588	39	340	21	592	146	125	108	185	110	276	430	216	226	342	263	388	210
YDL012C	211	162	112	274	58	138	171	310	147	322	204	412	307	1403	489	663	288	885	111	427	69	377	43	328	38	217	21	264	24	190	27	305	24	165	15	304	111	168	90	151	99	255	226	107	135	207	178	215	112
YDL013W	154	56	70	72	43	44	163	281	135	278	171	353	55	101	81	66	78	45	129	282	58	261	48	209	27	105	17	150	15	90	37	281	20	145	16	259	108	75	101	76	107	87	275	123	169	191	180	193	58
YDL014W	133	24	83	39	54	30	219	154	216	151	253	194	35	3	35	0	41	2	103	6	77	11	64	3	21	1	10	11	8	21	31	150	19	56	12	141	79	42	98	39	95	61	196	30	116	45	126	44	74
YDL018C	185	180	142	267	54	173	169	346	135	346	152	438	231	1137	333	679	260	653	51	510	66	450	39	363	40	276	36	384	15	353	34	490	19	252	14	475	113	173	93	210	118	312	288	134	148	229	173	246	104
YDL019C	239	76	127	129	66	67	123	152	96	152	111	180	113	328	153	191	93	140	53	155	36	131	14	78	28	98	26	92	24	99	46	181	35	112	20	176	142	93	135	111	92	154	366	67	225	114	215	131	73
YDL022W	78	32	35	45	18	21	105	75	83	85	97	125	63	276	75	119	54	214	34	118	34	191	29	152	4	27	11	23	7	20	18	109	14	38	8	103	31	14	30	19	14	68	108	40	59	44	43	45	21
YDL024C	59	22	30	62	31	25	63	149	55	140	77	187	11	0	15	0	19	0	88	182	18	160	14	166	11	104	13	112	14	110	15	175	10	96	14	173	63	81	53	102	45	133	139	55	78	99	90	102	45
YDL025C	91	72	78	98	38	57	105	221	91	192	109	256	161	601	177	251	169	398	86	254	49	262	22	234	31	317	20	440	11	331	26	403	20	199	13	408	83	74	67	98	69	159	303	110	153	151	187	174	37
YDL027C	0	0	0	0	1	0	1	14	4	15	6	19	1	0	1	0	0	0	0	0	0	0	1	0	0	0	0	2	0	0	0	0	0	0	0	0	0	0	0	0	0	0	4	0	1	1	1	1	0
YDL028C	256	250	120	383	96	208	124	225	103	214	142	362	210	609	307	309	157	365	206	1096	47	610	27	760	25	346	14	240	19	379	38	369	26	206	25	508	116	140	107	191	63	330	293	134	127	151	211	190	49
YDL029W	138	84	89	141	54	85	71	159	65	145	80	168	86	302	111	186	100	171	29	170	32	110	14	117	25	115	9	59	19	113	24	273	17	149	12	304	55	55	60	67	39	108	205	71	104	136	150	145	80
YDL031W	169	119	137	202	67	91	176	252	147	249	197	312	37	0	48	0	43	0	61	259	61	254	34	148	55	219	37	231	29	219	50	370	55	224	23	366	159	141	110	116	126	178	406	128	234	186	246	196	147
YDL033C	142	98	98	165	61	131	112	209	113	214	130	303	45	148	66	75	50	74	84	134	39	157	31	179	32	279	25	217	21	133	31	506	32	312	26	582	130	111	91	111	82	174	327	171	202	283	214	277	195
YDL037C	289	292	193	449	96	266	161	277	160	303	172	414	186	1360	310	691	247	809	129	933	52	765	39	738	60	837	30	760	19	817	41	567	30	271	13	542	147	240	121	271	106	377	329	157	227	283	209	307	230
YDL040C	3	0	1	0	2	0	104	229	84	233	110	303	2	0	3	0	1	0	100	250	41	200	20	164	1	24	2	58	2	42	0	0	0	0	0	0	1	0	3	0	3	0	7	3	2	6	4	2	0
YDL042C	1	0	0	0	0	0	2	1	3	1	1	0	0	2	1	0	0	0	0	1	0	0	0	1	0	0	0	0	2	0	1	10	1	4	1	10	5	16	4	8	5	19	8	1	2	3	4	6	1
YDL044C	110	83	75	145	32	82	72	121	65	100	71	151	41	143	63	72	54	83	43	207	21	137	25	149	27	173	15	185	16	132	24	217	20	116	5	242	51	34	42	33	38	63	159	57	121	110	89	108	57
YDL045C	0	0	0	0	0	0	0	0	0	0	0	0	0	0	0	0	0	0	0	0	0	0	0	0	0	0	0	0	0	0	0	0	0	0	0	0	0	0	0	0	0	0	0	0	0	0	0	0	0
YDL046W	202	268	130	309	78	206	149	258	110	273	164	422	259	1160	361	523	207	668	100	430	38	248	26	311	31	307	25	314	26	255	27	478	23	225	20	569	95	123	89	158	76	239	285	142	134	191	201	259	38
YDL047W	0	0	0	0	0	0	0	0	0	0	0	0	0	0	0	0	0	0	0	0	0	0	0	0	0	0	0	0	0	0	0	0	0	0	0	0	0	0	0	0	0	0	0	0	0	0	0	0	0
YDL048C	118	116	99	199	53	104	94	141	77	161	103	186	128	447	200	199	121	187	40	281	32	166	22	153	27	191	16	301	12	281	28	425	25	201	14	425	73	77	56	58	95	120	243	96	147	162	141	182	80
YDL049C	0	0	0	0	0	0	0	0	0	0	0	0	0	0	0	0	0	0	0	0	0	0	0	0	0	0	0	0	0	0	0	0	0	0	0	0	0	0	0	0	0	0	0	0	0	0	0	0	0
YDL052C	173	81	99	129	42	77	106	188	94	165	121	220	97	301	159	144	112	213	31	191	43	112	30	154	40	265	24	302	26	267	28	353	21	200	20	377	109	154	105	168	86	280	310	141	153	186	171	232	136
YDL053C	120	66	59	138	49	54	57	84	58	72	43	156	124	584	167	274	79	285	116	268	16	239	13	292	22	352	15	285	11	319	17	322	14	144	17	437	96	56	83	129	47	229	188	75	96	101	124	135	72
YDL054C	160	116	108	189	63	101	134	153	109	170	136	243	223	765	364	584	215	579	87	225	49	217	22	250	20	130	15	142	23	106	25	431	30	246	19	441	92	64	60	87	60	129	281	94	166	153	175	197	150
YDL055C	246	184	154	289	79	174	188	375	186	431	195	538	299	2340	503	1031	341	1296	109	846	65	670	43	533	51	478	29	715	41	376	51	562	34	334	21	666	128	156	107	170	106	238	393	198	229	354	266	341	183
YDL056W	174	136	119	194	61	122	95	130	95	133	99	171	71	350	92	122	61	150	72	288	28	425	19	232	26	204	17	139	17	223	29	271	21	138	15	289	113	88	92	117	70	234	221	85	158	169	154	154	74
YDL059C	213	198	107	314	57	177	131	246	102	198	141	270	217	1066	304	603	233	787	151	837	58	718	37	595	25	208	23	276	28	228	30	517	26	288	35	538	113	119	95	159	98	229	262	123	174	186	174	221	122
YDL060W	277	161	172	244	104	122	141	239	115	221	156	223	50	62	90	39	72	24	120	207	48	149	34	124	33	34	23	44	18	79	46	529	38	329	33	600	96	68	101	41	93	95	397	147	235	247	266	261	75
YDL061C	147	113	84	187	33	112	158	381	121	391	174	568	38	15	60	31	46	31	101	251	64	144	36	86	26	226	22	246	21	154	36	369	17	192	13	386	88	181	70	174	68	299	165	69	102	127	112	140	42
YDL063C	104	65	49	70	24	48	98	163	93	162	115	217	16	0	14	0	10	0	110	324	33	166	20	216	10	43	11	72	3	22	16	123	13	72	7	137	50	71	39	69	37	122	104	51	44	60	86	71	29
YDL064W	143	132	96	206	52	150	357	848	326	882	375	1168	179	714	212	356	206	447	230	1406	133	1138	98	1289	26	242	5	192	17	174	37	525	29	293	21	514	68	107	70	110	77	206	148	91	88	136	96	150	92
YDL066W	125	109	94	181	51	99	82	128	86	112	83	177	102	456	190	249	96	244	96	638	51	395	22	546	20	140	21	253	15	110	28	374	23	207	9	335	61	59	64	90	58	105	180	72	98	116	130	137	102
YDL067C	266	261	170	387	89	223	193	402	174	433	208	613	223	1025	335	455	219	578	149	335	83	361	40	401	53	396	34	620	41	528	53	628	37	346	21	709	164	185	167	211	131	348	407	199	246	348	258	355	56
YDL069C	81	82	66	182	35	84	48	91	25	70	55	122	12	0	34	0	13	0	0	82	18	63	8	65	20	376	10	444	15	190	19	230	9	110	7	189	75	182	81	163	63	313	192	96	77	112	83	111	45
YDL070W	206	202	130	327	69	175	84	106	85	112	82	161	93	338	135	178	98	195	58	200	29	162	10	268	10	69	16	111	16	82	33	341	27	197	8	360	104	96	67	87	69	129	218	121	153	146	165	168	122
YDL072C	205	227	163	337	74	175	193	479	162	514	239	632	31	0	50	0	37	0	272	1239	78	980	37	982	33	492	32	515	28	374	33	588	29	337	17	657	130	214	116	225	88	349	343	183	164	272	233	320	178
YDL074C	111	119	82	174	40	102	137	239	120	273	142	389	193	878	294	406	253	542	164	449	44	364	24	341	12	28	6	57	15	14	27	358	20	195	17	380	51	66	39	57	54	115	88	32	60	41	69	55	42
YDL075W	18	12	6	19	6	6	202	371	171	419	244	486	3	0	3	0	1	0	100	199	72	204	49	169	3	2	3	0	1	0	5	21	2	6	1	18	16	19	9	14	12	16	20	2	7	4	4	5	10
YDL077C_1	125	36	82	56	46	35	70	99	64	94	86	127	88	544	162	249	119	326	57	190	26	125	18	113	39	340	12	297	10	261	28	168	15	99	19	143	87	50	82	52	71	67	212	47	101	68	136	89	74
YDL077C_2	0	0	0	0	0	0	0	0	0	0	0	0	0	0	0	0	0	0	0	0	0	0	0	0	0	0	0	0	0	0	0	0	0	0	0	0	0	0	0	0	0	0	0	0	0	0	0	0	0
YDL078C	175	176	102	259	58	181	86	174	84	174	98	197	69	495	115	194	72	194	66	125	27	129	22	85	29	208	23	362	34	212	44	494	24	290	20	482	137	238	121	252	128	418	419	211	238	316	264	368	203
YDL079C	0	0	0	0	0	0	0	0	0	0	0	0	0	0	0	0	0	0	0	0	0	0	0	0	0	0	0	0	0	0	0	0	0	0	0	0	0	0	0	0	0	0	0	0	0	0	0	0	0
YDL080C	140	117	120	169	67	104	131	185	132	162	128	264	31	0	59	0	40	0	103	335	44	232	24	248	48	592	24	689	30	568	36	320	28	192	13	336	147	243	169	310	125	518	371	115	205	169	256	217	150
YDL083C	32	27	21	41	8	21	99	191	87	192	110	263	1	0	2	0	1	0	85	53	35	45	25	53	1	0	2	0	0	0	0	2	2	4	0	2	4	4	7	7	3	13	8	1	5	1	5	4	4
YDL084W	343	42	203	77	90	55	95	66	101	58	110	111	124	37	245	17	153	19	143	41	39	20	36	11	38	28	13	28	33	16	74	463	63	248	40	433	354	245	307	265	252	458	668	178	367	275	508	300	235
YDL085C-A	173	175	119	227	69	123	140	318	113	302	150	401	146	873	257	453	168	620	151	594	67	632	31	600	42	305	15	404	19	241	29	282	18	203	10	311	98	122	82	145	90	190	255	111	148	195	181	188	101
YDL085W	213	175	129	273	73	175	169	266	178	294	166	384	315	1637	537	877	350	1087	112	414	52	429	40	428	48	370	31	322	32	407	43	451	27	329	21	522	121	153	112	173	99	312	291	122	179	187	227	198	99
YDL086W	190	182	128	284	77	180	206	367	178	351	177	478	256	1401	403	690	317	891	159	654	59	439	28	464	47	369	23	411	27	318	32	358	22	196	18	377	122	161	117	193	105	296	309	132	160	255	170	237	120
YDL087C	77	52	29	72	16	42	200	419	193	395	180	582	7	0	4	0	12	0	140	1072	102	768	43	816	11	69	6	67	1	112	6	95	9	46	3	94	17	17	15	19	23	33	48	16	14	16	32	29	5
YDL088C	35	35	24	46	5	25	40	60	37	53	49	73	3	0	4	0	5	0	49	67	16	57	11	58	5	11	7	8	5	47	6	33	5	19	4	46	21	20	18	15	13	31	45	18	24	27	35	42	20
YDL090C	208	202	123	326	70	189	180	368	148	380	179	496	519	3793	777	1612	571	1900	311	1820	82	1250	52	1558	36	442	20	369	22	554	39	521	28	334	22	623	115	207	118	205	110	309	274	121	154	174	176	214	97
YDL091C	100	42	68	48	25	37	95	214	94	204	110	251	14	0	35	0	20	1	321	1339	84	944	39	1228	34	424	18	536	29	537	28	350	13	168	9	341	101	135	80	145	56	258	170	44	84	70	91	89	74
YDL092W	88	75	52	120	32	86	95	225	97	222	134	318	18	0	24	0	16	0	96	305	37	285	27	270	23	216	13	231	7	182	18	169	10	110	4	192	56	61	42	71	47	150	184	66	117	120	110	155	28
YDL098C	200	232	162	314	78	199	163	266	124	268	124	372	173	797	277	414	187	468	159	393	51	244	37	203	40	363	26	326	26	303	24	446	25	209	14	430	120	175	130	131	102	268	407	189	214	319	225	288	64
YDL100C	186	144	130	224	67	138	184	267	143	297	167	381	129	560	201	326	138	388	152	420	73	229	44	275	41	221	18	194	24	234	27	544	31	231	18	452	151	298	158	248	136	425	322	147	186	249	214	260	158
YDL101C	141	130	65	195	49	96	52	102	33	99	56	133	37	168	58	102	52	77	51	57	11	101	11	119	12	224	7	195	10	122	17	157	11	80	8	162	45	12	44	18	30	17	183	74	92	106	107	127	65
YDL102W	113	72	62	106	34	63	21	31	12	40	18	47	71	291	78	157	46	138	20	47	8	50	5	61	14	42	6	96	12	51	22	165	14	81	14	159	76	67	63	75	43	115	170	56	99	67	141	69	42
YDL104C	0	0	0	0	0	0	0	0	0	0	0	0	0	0	0	0	0	0	0	0	0	0	0	0	0	0	0	0	0	0	0	0	0	0	0	0	0	0	0	0	0	0	0	0	0	0	0	0	0
YDL105W	273	292	169	448	98	286	112	204	96	171	138	254	111	480	159	313	117	239	104	207	37	147	21	163	53	364	21	588	31	430	45	679	37	304	20	630	107	127	113	150	118	270	408	166	231	259	247	361	101
YDL106C	2	0	5	0	1	0	58	61	56	72	66	103	0	0	2	0	4	0	1	273	23	383	19	207	7	147	0	139	3	86	1	31	3	10	0	30	11	4	13	8	4	7	20	3	10	3	8	8	3
YDL107W	129	117	70	174	50	97	48	115	43	89	71	160	211	1277	358	632	191	657	82	353	18	213	7	402	22	165	9	189	11	181	21	324	13	126	8	362	88	112	77	179	47	314	181	77	99	84	94	103	76
YDL109C	84	42	35	65	27	29	109	219	99	216	140	273	273	1246	481	504	330	669	35	609	57	498	37	415	25	288	19	378	19	340	12	183	14	85	13	172	91	208	68	194	55	341	122	29	72	54	85	60	29
YDL110C	127	86	83	153	42	87	67	105	62	109	86	135	110	505	139	253	75	267	39	195	33	233	19	178	18	168	7	141	14	156	20	233	24	147	8	221	101	161	71	158	71	279	175	87	102	177	123	180	61
YDL113C	108	47	61	84	17	55	39	73	56	69	65	92	15	0	20	0	16	0	39	75	26	38	12	49	18	146	12	131	9	146	12	128	9	75	10	163	56	57	43	64	32	128	117	63	58	73	76	89	50
YDL114W	193	141	98	185	66	115	104	227	96	247	142	363	135	868	264	304	130	402	203	783	33	777	16	771	32	343	26	342	25	335	35	304	22	175	11	422	126	115	103	219	86	333	281	99	115	124	152	177	92
YDL115C	125	113	92	197	53	116	67	145	54	124	77	193	9	0	27	0	25	0	16	304	23	195	17	150	38	364	14	404	17	352	32	316	15	186	19	335	100	128	82	151	79	251	227	91	118	173	158	192	115
YDL116W	103	56	75	105	25	59	74	116	77	128	56	157	76	473	134	140	111	211	47	99	16	62	11	53	24	226	15	236	15	129	18	173	12	100	7	162	69	93	73	118	57	145	172	58	98	88	131	101	51
YDL120W	353	332	211	519	125	338	259	554	284	589	308	743	394	2138	524	1091	402	1171	169	724	100	600	51	509	60	508	35	695	47	422	59	891	48	426	41	789	164	123	125	154	123	243	466	234	281	405	321	472	164
YDL121C	127	115	67	171	43	120	120	240	95	260	102	331	7	0	17	0	12	1	89	254	40	161	42	188	11	114	13	125	8	119	20	285	18	127	12	243	62	88	45	117	55	135	159	87	83	123	126	148	148
YDL123W	193	158	129	235	73	167	105	168	84	174	106	228	230	1277	339	598	207	659	124	296	42	294	24	377	35	401	15	565	25	381	33	456	30	230	22	411	112	113	94	163	107	310	347	151	196	274	228	351	173
YDL124W	250	186	142	361	57	199	104	217	86	236	109	279	161	761	252	401	164	377	56	289	39	261	19	198	29	216	18	133	24	153	31	519	17	263	24	413	98	102	80	102	94	167	228	121	117	160	154	181	144
YDL128W	125	70	80	110	48	81	173	330	150	343	166	438	121	517	181	282	146	311	54	384	59	351	41	362	21	205	18	386	32	202	21	532	29	273	18	543	96	94	85	102	78	143	193	69	128	105	140	133	145
YDL129W	169	161	136	277	53	165	104	158	92	131	131	197	16	0	39	0	21	0	188	490	43	522	32	471	30	462	30	436	28	349	30	355	19	198	20	372	109	224	87	215	115	357	319	104	191	197	208	217	124
YDL130W	144	82	98	114	55	58	141	157	141	157	172	217	32	27	64	16	48	7	121	33	53	26	34	67	18	12	12	11	18	21	42	255	33	141	16	301	114	71	80	91	95	127	259	89	144	158	153	129	52
YDL130W-A	245	215	174	317	81	217	156	325	163	341	163	465	114	475	188	258	150	291	137	429	68	200	40	259	27	146	25	134	29	130	46	652	34	348	18	755	170	154	112	203	135	315	411	211	250	391	317	415	150
YDL133C-A	165	64	114	112	48	60	204	244	173	280	189	368	41	39	67	21	63	37	46	39	65	18	51	44	26	16	26	6	17	8	49	212	27	139	18	216	126	24	91	21	103	36	355	68	204	116	258	129	66
YDL133W	119	37	104	64	50	31	173	181	131	197	193	223	59	58	86	22	49	16	140	15	64	28	29	18	13	5	11	0	21	8	26	116	25	77	16	121	113	27	108	25	98	55	312	57	185	85	231	89	49
YDL134C	288	82	179	130	109	71	176	312	141	268	191	380	121	99	158	80	113	54	142	74	48	29	30	66	15	20	19	29	17	56	24	322	27	190	24	290	102	51	64	49	77	84	188	57	108	93	151	127	104
YDL136W	246	133	144	265	84	150	94	239	79	242	110	310	264	14266	404	6565	267	8803	92	4810	39	5068	25	4467	98	52959	55	53914	49	43738	39	888	44	402	30	727	139	146	119	169	142	254	448	271	249	419	324	506	147
YDL137W	378	106	233	164	141	101	107	64	100	51	126	83	59	22	52	4	44	10	24	2	32	7	23	5	31	35	26	33	27	33	50	349	44	138	21	274	135	58	124	55	133	92	347	113	217	173	238	209	97
YDL138W	56	23	36	43	19	23	128	187	90	195	118	282	4	0	20	0	8	0	90	440	33	341	17	388	19	287	4	171	15	242	15	135	11	59	8	134	75	103	53	125	51	248	73	20	42	21	48	34	24
YDL139C	229	183	162	352	100	204	158	306	118	305	166	430	278	1838	435	903	282	887	138	524	44	435	37	447	30	796	19	832	23	716	43	682	22	304	26	726	111	166	92	190	85	336	323	173	166	241	220	255	194
YDL141W	215	145	141	225	74	118	164	281	163	306	194	395	95	325	144	178	127	212	114	343	68	266	34	212	48	424	18	300	26	309	40	367	33	199	16	344	128	148	122	202	120	282	376	140	229	224	280	260	103
YDL143W	216	146	126	201	58	109	151	262	143	253	169	309	132	662	179	289	134	342	98	590	63	529	33	604	51	523	30	574	36	558	40	544	20	292	14	534	145	226	121	216	100	389	396	171	228	312	267	345	102
YDL144C	153	120	80	165	40	90	83	143	70	156	96	193	37	198	62	48	47	113	44	272	30	306	21	346	36	231	7	335	20	186	15	230	12	127	3	204	92	86	73	94	82	183	274	145	149	217	197	239	79
YDL145C	0	0	0	0	0	0	0	0	0	0	0	0	0	0	0	0	0	0	0	0	0	0	0	0	0	0	0	0	0	0	0	0	0	0	0	0	0	0	0	0	0	0	0	0	0	0	1	0	0
YDL147W	264	303	151	420	93	250	169	320	163	342	223	494	70	269	122	138	68	186	139	518	59	425	43	462	35	278	21	298	21	224	48	534	36	281	22	588	139	213	124	180	108	339	325	178	181	240	216	334	190
YDL148C	102	85	78	156	21	73	114	273	112	298	125	319	66	273	100	128	70	139	156	386	49	448	30	475	7	55	8	63	11	43	17	80	6	55	7	98	45	29	30	20	35	47	114	52	69	91	82	88	29
YDL149W	42	10	16	15	5	3	92	173	72	156	112	241	1	0	2	0	5	0	41	124	34	122	13	84	9	16	0	26	4	25	3	19	3	9	1	13	18	17	14	22	24	44	16	3	13	6	12	9	29
YDL150W	331	279	202	412	101	233	126	263	116	297	152	321	202	804	332	414	213	515	121	475	53	307	35	365	47	456	32	473	43	344	62	517	32	291	16	534	142	190	130	177	140	318	439	193	275	331	319	381	179
YDL153C	0	0	0	0	0	0	0	0	0	0	0	0	0	0	0	0	0	0	0	0	0	0	0	0	0	0	0	0	0	0	0	0	0	0	0	0	0	0	0	0	0	0	0	0	0	0	0	0	0
YDL154W	0	0	0	0	0	0	0	0	0	0	0	0	0	0	0	0	0	0	0	0	0	0	0	0	0	0	0	0	0	0	0	0	0	0	0	0	0	0	0	0	0	0	0	0	0	0	0	0	0
YDL155W	53	39	34	56	16	31	61	93	56	100	77	155	5	0	11	0	10	0	122	280	16	219	7	272	8	62	9	53	9	54	3	83	7	39	8	107	42	54	34	85	34	100	54	30	20	18	35	35	15
YDL156W	125	120	106	183	57	87	134	253	109	221	131	371	98	65	114	14	86	16	246	690	61	504	25	534	25	194	20	235	17	251	21	263	22	119	9	224	124	144	93	142	89	224	250	100	153	124	181	188	42
YDL159W-A	154	134	115	242	61	132	104	249	103	253	140	352	261	1745	374	821	248	1011	180	630	53	533	33	324	19	333	15	389	23	341	50	415	27	206	27	411	96	148	93	179	86	273	285	129	137	182	159	209	61
YDL160C	132	66	84	121	47	70	156	246	150	232	183	331	191	656	273	299	187	381	110	156	45	191	38	141	42	100	16	204	16	94	59	564	29	248	32	492	156	143	102	135	101	266	220	91	136	168	166	147	124
YDL160C-A	200	156	114	242	73	144	149	324	149	333	150	484	527	3091	842	1350	521	1690	139	681	47	543	29	511	29	339	16	462	11	228	31	470	26	231	20	467	129	120	94	163	81	256	269	138	128	171	196	248	200
YDL164C	244	174	181	230	114	146	167	323	174	289	175	439	145	467	269	425	174	325	172	762	73	666	50	688	29	91	20	140	27	141	64	667	45	356	33	659	159	171	142	158	137	335	426	154	280	252	322	287	119
YDL165W	137	60	73	123	35	72	51	65	48	61	42	66	105	400	164	255	109	261	6	56	15	22	7	34	23	312	10	273	19	167	22	299	16	159	15	301	69	92	58	101	71	160	224	122	135	210	146	250	102
YDL166C	155	157	107	225	57	130	149	237	127	238	132	314	74	323	119	142	77	273	124	525	41	468	28	650	27	127	17	194	19	153	41	352	14	186	20	408	109	192	100	195	89	284	250	133	144	222	177	244	105
YDL167C	42	22	18	27	16	16	22	48	27	45	33	60	45	291	82	81	47	69	19	35	8	36	5	87	4	36	4	33	10	55	5	64	4	28	3	59	28	33	26	28	25	52	59	21	42	32	38	38	14
YDL168W	251	243	182	390	91	233	172	327	147	313	158	429	110	551	127	230	106	263	138	646	64	487	50	534	28	297	22	291	24	214	57	643	51	357	32	641	135	157	130	152	95	258	342	137	187	248	202	264	100
YDL169C	31	36	21	44	14	37	30	27	22	31	31	44	2	0	3	0	3	0	0	37	2	17	4	10	1	0	2	28	2	30	3	16	2	12	0	14	14	16	8	25	17	30	26	6	21	8	16	10	3
YDL170W	144	129	89	182	65	105	119	240	85	241	121	279	86	353	131	120	74	161	13	337	31	214	20	194	27	136	19	131	17	202	25	370	23	189	16	312	100	118	80	118	84	188	220	98	136	130	162	163	150
YDL175C	157	131	90	189	56	118	108	182	89	196	94	283	327	1862	549	935	363	1207	131	499	38	255	26	266	34	315	15	302	14	281	38	554	28	249	24	556	136	133	98	242	90	343	282	112	147	159	173	239	68
YDL176W	237	185	136	286	82	144	184	287	148	261	181	340	47	202	68	147	66	126	63	489	66	465	33	407	29	275	14	409	25	267	55	390	30	268	24	394	122	223	119	221	98	355	207	95	124	119	147	144	113
YDL177C	605	601	338	942	199	588	369	729	314	729	366	958	297	1454	485	756	354	921	321	1865	145	1670	86	1402	94	917	47	1130	62	855	99	1289	73	586	42	1160	239	456	218	442	204	730	547	313	321	538	344	555	330
YDL178W	296	265	173	361	88	239	147	301	131	311	168	343	135	534	225	332	164	342	178	712	42	506	36	318	42	281	19	258	33	399	45	545	33	282	19	556	130	134	99	131	114	223	363	147	215	255	227	297	93
YDL180W	288	193	175	331	75	209	173	326	139	330	228	471	118	289	190	119	102	189	253	1151	79	725	51	879	51	639	28	772	26	537	52	530	43	307	31	585	185	236	157	242	149	485	463	200	231	295	277	312	220
YDL182W	2	0	0	0	1	0	79	117	101	147	104	169	3	0	0	0	1	0	76	84	45	43	19	65	2	0	0	0	1	0	1	21	0	8	1	17	4	5	2	1	2	11	6	1	3	1	3	0	3
YDL184C	0	0	0	0	0	0	0	0	0	0	0	0	0	0	0	0	0	0	0	0	0	0	0	0	0	0	0	0	0	0	0	0	0	0	0	0	0	0	0	0	0	0	0	0	0	0	0	0	0
YDL186W	208	176	119	280	41	167	23	88	30	98	42	97	17	0	19	0	25	0	59	160	16	141	15	150	44	433	23	619	26	427	37	804	42	441	29	787	132	333	102	357	111	584	460	232	212	279	283	409	102
YDL188C	227	38	147	56	67	44	180	311	172	313	207	386	33	0	41	0	29	0	227	293	93	180	50	218	85	278	33	351	41	297	51	356	36	156	19	301	137	130	100	181	87	246	240	99	168	124	213	169	106
YDL189W	192	142	125	190	73	125	138	314	125	301	148	384	176	934	243	392	201	549	219	554	68	505	50	561	32	391	14	320	17	470	28	393	18	185	21	395	109	150	92	187	88	302	235	86	115	157	142	164	82
YDL190C	82	60	52	71	28	48	76	154	59	126	84	179	60	232	76	116	63	152	53	274	28	116	18	139	15	84	8	93	12	64	17	180	17	72	11	186	31	8	42	7	28	16	104	36	71	59	81	55	27
YDL191W	199	146	130	252	78	141	216	416	196	415	212	548	282	574	441	274	311	313	188	326	83	264	40	211	45	249	21	211	31	171	42	539	41	257	15	490	153	215	143	208	125	387	288	103	174	169	167	185	91
YDL192W	295	17	212	34	105	15	114	23	123	31	146	28	44	4	79	0	45	2	94	6	41	0	30	0	36	0	25	1	15	1	58	228	40	87	30	165	152	21	107	15	167	35	437	52	257	83	326	108	65
YDL193W	193	161	150	227	71	162	163	380	136	356	160	462	157	1113	236	540	167	573	110	914	50	830	37	832	48	641	39	656	37	596	65	665	43	377	34	695	139	220	130	266	114	425	377	225	194	334	252	335	192
YDL194W	119	27	58	43	49	30	88	111	77	102	101	115	97	264	157	168	91	196	47	54	33	32	15	13	24	155	9	285	20	199	29	307	20	139	16	301	105	99	103	153	88	211	256	64	163	86	128	109	38
YDL195W	99	4	72	7	35	8	69	9	58	8	76	14	29	8	35	1	29	4	42	0	27	4	15	0	20	6	12	0	12	13	9	24	10	13	8	16	82	12	87	14	72	16	267	21	155	25	166	24	40
YDL198C	0	0	0	0	0	0	1	0	0	1	1	2	1	0	0	0	0	0	0	0	0	0	0	0	0	0	0	0	0	0	0	0	0	0	0	0	0	0	0	0	0	0	0	0	1	0	2	0	0
YDL199C	209	145	146	236	79	132	186	413	178	391	227	549	99	666	182	314	135	402	142	761	73	529	29	605	39	358	21	418	24	317	31	451	30	237	24	405	134	139	100	173	101	259	307	139	179	237	247	235	97
YDL200C	122	80	80	143	32	70	106	247	133	281	143	387	29	0	40	0	23	0	128	568	35	507	20	444	31	309	12	346	20	286	30	389	15	164	11	306	137	211	98	177	94	352	275	161	160	252	210	261	93
YDL201W	184	209	110	305	66	173	154	306	117	319	182	405	198	774	354	449	238	520	182	383	31	231	30	258	21	258	13	144	16	204	27	298	19	164	13	282	79	96	53	90	72	135	195	70	91	88	104	154	62
YDL202W	648	759	392	1187	231	740	28	87	19	92	41	131	563	3294	785	1704	598	2161	92	279	16	261	3	209	107	1575	51	1843	63	1407	126	1730	99	881	69	1871	293	630	289	618	286	1014	1183	614	603	970	781	1040	525
YDL203C	424	297	244	524	148	273	273	619	248	591	288	744	542	2792	856	1431	565	1739	171	739	98	658	62	446	80	942	42	1258	55	927	100	1005	65	548	40	1030	191	199	187	221	161	353	620	269	388	413	413	492	312
YDL204W	132	47	87	91	41	43	42	37	38	49	45	63	21	20	34	7	12	27	21	80	18	51	11	166	21	131	11	288	10	132	22	198	19	130	9	245	97	74	70	51	71	96	190	73	100	128	119	152	96
YDL205C	156	106	80	169	50	115	140	174	112	169	135	268	16	0	27	0	21	0	129	247	34	133	31	188	29	253	16	216	17	259	19	302	13	120	16	247	104	147	65	176	79	332	151	65	94	100	108	120	80
YDL206W	32	24	17	26	11	17	36	55	33	64	31	87	0	0	3	0	0	0	24	134	4	81	1	152	3	0	1	0	1	0	1	3	2	3	1	4	4	0	3	0	6	0	12	3	11	4	9	13	3
YDL209C	127	106	79	156	36	87	107	194	128	188	114	294	73	56	101	29	68	41	90	271	38	168	12	140	19	233	12	249	11	146	23	266	23	137	9	255	90	110	87	164	73	182	137	48	77	57	78	77	109
YDL210W	0	0	0	0	0	0	0	0	0	0	0	0	0	0	0	0	0	0	0	0	0	0	0	0	0	0	0	0	0	0	0	0	0	0	0	0	0	0	0	0	0	0	0	0	0	0	0	0	0
YDL212W	237	144	153	253	74	152	189	330	180	342	225	525	148	524	214	267	173	263	128	348	79	329	43	350	45	237	30	301	38	321	39	615	35	300	25	591	124	221	141	211	125	347	409	188	234	286	266	349	157
YDL213C	211	171	81	276	82	151	45	66	89	69	87	121	38	189	70	119	24	64	91	227	27	256	14	229	17	121	9	241	4	258	17	258	16	100	13	376	104	22	48	76	11	236	196	73	53	64	98	156	19
YDL214C	174	89	103	141	67	94	93	194	110	182	103	230	25	0	37	0	18	0	61	185	36	252	25	326	24	236	16	165	29	111	20	242	19	111	17	219	88	98	101	144	85	211	238	57	137	98	188	117	67
YDL215C	0	0	0	0	0	0	0	0	0	0	0	0	0	0	0	0	0	0	0	0	0	0	0	0	0	0	0	0	0	0	0	0	0	0	0	0	0	0	0	0	0	0	0	0	0	0	0	0	0
YDL217C	126	100	62	193	42	99	58	141	56	135	69	240	284	1757	370	886	284	955	61	434	25	323	11	237	14	151	12	206	19	144	15	260	14	138	14	383	82	72	44	107	52	160	188	74	103	137	119	149	26
YDL226C	0	0	0	0	0	0	0	0	0	0	0	0	0	0	0	0	0	0	0	0	0	0	0	0	0	0	0	0	0	0	0	0	0	0	0	0	0	0	0	0	0	0	0	0	0	0	0	0	0
YDL227C	265	229	142	310	97	171	69	178	47	183	83	263	220	1112	284	605	221	683	98	432	17	389	21	397	56	725	26	1203	35	810	48	431	27	249	24	564	134	240	136	261	112	396	397	161	207	251	224	287	102
YDL229W	127	29	83	81	55	30	155	93	92	67	132	97	40	3	60	6	46	3	38	1	50	1	22	0	30	26	24	25	20	11	29	154	14	81	17	136	100	3	68	8	84	19	298	53	193	76	222	82	83
YDL231C	0	0	0	0	0	0	0	0	0	0	0	0	0	0	0	0	0	0	0	0	0	0	0	0	0	0	0	0	0	0	0	0	0	0	0	0	0	0	0	0	0	0	0	0	0	0	0	0	0
YDL235C	433	390	283	605	144	382	33	111	31	116	43	146	299	2067	571	1083	386	1355	21	178	14	138	9	207	52	551	26	589	37	395	77	1118	60	550	40	1040	132	246	111	251	124	436	443	234	275	398	347	427	271
YDL237W	84	54	57	69	33	44	83	180	70	195	100	188	254	1539	407	785	306	956	40	637	30	373	15	375	17	112	14	133	8	115	25	208	12	130	11	222	59	75	63	98	45	151	191	65	110	104	124	122	36
YDL240W	188	41	136	57	76	29	23	60	22	46	28	69	3	0	9	0	6	0	14	76	7	26	5	15	12	24	2	51	4	6	5	53	14	10	5	26	38	10	41	24	33	41	70	9	48	23	56	19	58
YDL241W	903	1054	581	1540	286	1011	316	720	312	713	399	1003	548	3659	811	1710	569	1838	555	2569	165	2642	92	2011	146	2955	84	3522	119	2644	146	2142	100	1151	70	2250	401	794	344	864	357	1296	1330	829	747	1289	841	1447	1041
YDL243C	222	151	152	204	67	123	158	330	157	346	182	433	292	1290	402	714	306	720	54	443	72	348	35	337	40	362	26	541	32	360	43	573	39	318	27	486	169	195	119	186	121	337	409	157	215	229	275	253	158
YDR001C	102	51	71	65	48	60	227	469	196	428	251	598	41	146	82	57	55	99	153	1147	81	979	65	929	24	85	16	134	12	114	32	291	17	181	16	304	86	59	68	55	68	105	156	34	70	78	112	84	75
YDR003W-A	203	198	133	306	82	166	105	260	101	289	118	390	108	726	235	325	165	514	46	612	64	429	37	399	32	471	17	512	36	522	41	532	41	327	23	587	116	258	124	251	116	421	249	133	149	178	180	221	100
YDR005C	0	0	0	0	0	0	0	0	0	0	0	0	0	0	0	0	0	0	0	0	0	0	0	0	0	0	0	0	0	0	0	0	0	0	0	0	0	0	0	0	0	0	0	0	0	0	0	0	0
YDR006C	42	17	34	28	20	15	82	83	82	67	109	111	6	0	7	0	8	0	96	70	28	83	18	133	14	18	8	39	10	31	19	59	11	32	9	57	35	39	36	42	30	118	64	11	43	22	35	27	138
YDR007W	74	46	37	80	16	72	47	57	26	41	33	88	4	0	8	0	2	0	29	84	8	86	3	49	9	89	6	112	5	54	12	87	4	35	2	70	35	55	32	64	31	71	36	18	24	30	13	27	10
YDR009W	0	0	0	0	0	0	0	0	0	0	0	0	0	0	0	0	0	0	0	0	0	0	0	0	0	0	0	0	0	0	0	0	0	0	0	0	0	0	0	0	0	0	0	0	0	0	0	0	0
YDR011W	0	0	0	0	0	0	0	0	0	0	0	0	0	0	0	0	0	0	0	0	0	0	0	0	0	0	0	0	0	0	0	0	0	0	0	0	0	0	0	0	0	0	0	0	0	0	0	0	0
YDR013W	378	136	224	261	131	135	230	347	189	370	244	503	230	1224	364	603	253	741	151	1138	81	951	42	924	56	478	31	919	37	650	56	447	43	184	39	354	147	78	130	120	124	165	460	130	252	222	280	274	215
YDR014W	175	88	118	119	51	87	122	139	94	105	133	141	97	819	144	306	86	351	70	612	35	670	22	602	27	453	19	389	21	341	42	222	30	120	20	182	94	23	57	46	60	60	237	60	144	92	146	92	66
YDR016C	0	0	0	0	0	0	0	0	0	0	0	0	0	0	0	0	0	0	0	0	0	0	0	0	0	0	0	0	0	0	0	0	0	0	0	0	0	0	0	0	0	0	0	0	0	0	0	0	0
YDR018C	60	0	35	0	27	0	15	7	25	10	19	8	11	0	24	0	27	0	12	0	3	0	4	0	7	0	10	0	9	0	7	0	6	1	1	2	57	0	45	0	46	0	190	1	87	3	91	6	67
YDR020C	136	73	71	137	50	78	59	150	55	148	57	191	13	0	21	0	21	0	17	9	18	19	18	1	32	512	20	508	15	371	16	180	19	88	5	181	57	91	50	101	59	165	189	57	92	103	109	91	35
YDR021W	39	12	36	20	19	13	110	139	81	112	109	159	11	0	13	0	11	0	92	155	34	126	13	168	14	91	7	79	7	64	10	154	12	86	6	145	45	20	33	28	32	34	52	16	30	11	31	28	37
YDR022C	220	160	151	275	71	159	170	325	147	350	152	479	36	72	70	36	52	44	72	291	52	259	22	291	43	187	20	140	26	164	44	716	42	314	22	611	114	121	93	149	96	188	302	121	193	184	213	240	89
YDR023W	92	31	54	47	33	29	71	96	58	75	61	107	116	365	164	127	126	202	9	68	26	46	20	34	14	74	18	80	14	67	14	187	17	102	9	214	64	49	43	54	61	87	160	77	96	99	109	134	48
YDR025W	135	40	91	76	37	38	123	184	110	169	152	193	26	22	39	3	29	10	76	62	66	24	29	68	9	4	8	0	13	19	26	157	23	83	8	148	62	39	51	30	66	82	186	45	118	56	122	59	65
YDR026C	167	115	104	158	55	83	131	187	116	220	154	244	102	471	149	195	103	218	66	396	59	236	38	258	20	114	17	176	18	141	34	326	37	159	14	295	101	132	103	132	84	177	227	68	134	106	172	137	130
YDR028C	203	52	92	64	63	37	84	87	88	80	103	106	23	0	37	0	17	0	70	74	13	56	19	119	19	90	15	59	9	49	28	129	23	68	18	132	85	44	77	73	68	140	235	53	111	67	167	101	51
YDR031W	98	108	56	180	28	83	152	326	165	325	193	441	321	2214	473	912	370	1225	255	906	52	567	40	703	11	70	8	129	9	91	15	213	13	119	6	201	41	51	31	56	56	77	88	38	46	62	66	64	146
YDR032C	176	107	117	218	60	122	158	286	145	322	163	426	122	760	190	333	156	421	118	563	49	475	38	364	14	361	23	473	22	224	29	394	21	200	13	441	91	56	67	56	66	101	246	124	144	185	168	253	66
YDR033W	176	59	111	119	69	53	137	177	133	165	131	182	26	16	42	0	36	11	40	43	30	23	20	19	20	97	20	76	21	71	54	150	39	92	18	145	164	105	117	121	115	191	212	58	126	94	200	112	43
YDR035W	73	53	50	96	31	49	142	437	120	349	177	543	10	0	21	1	11	0	161	441	57	489	31	385	16	183	13	120	11	155	14	244	11	150	6	235	51	29	30	38	48	55	63	33	45	72	57	79	81
YDR036C	103	78	76	119	38	62	110	180	102	209	136	242	36	137	69	52	67	65	154	264	37	275	40	172	17	72	8	86	12	76	26	360	23	170	9	291	75	83	47	81	78	148	196	73	124	102	127	132	99
YDR037W	155	103	80	120	62	82	141	217	102	234	136	295	65	46	92	68	66	52	116	319	53	235	37	190	33	109	19	137	17	191	47	457	23	321	21	586	109	91	81	120	83	177	266	105	153	149	166	188	78
YDR041W	199	191	132	296	88	170	169	377	140	375	207	549	51	4	76	3	51	6	141	1054	77	844	52	725	42	438	25	403	22	584	33	487	35	273	22	493	142	268	102	265	113	449	308	139	186	223	223	253	138
YDR042C	201	182	138	278	52	179	107	270	95	302	150	395	64	231	75	97	67	110	89	287	48	369	28	366	31	152	14	209	16	201	28	385	32	224	20	408	63	55	71	64	72	128	237	111	141	166	139	192	57
YDR044W	85	58	52	87	27	40	66	114	63	124	80	219	11	0	18	0	14	0	53	458	25	311	6	474	16	282	9	220	15	251	19	260	16	126	13	377	54	87	38	99	38	219	150	75	59	53	86	94	63
YDR045C	218	180	125	285	60	184	165	349	166	357	199	469	196	632	279	510	225	442	86	668	63	652	41	677	29	178	13	246	16	162	57	735	44	368	25	799	132	250	107	323	125	457	311	171	174	265	236	316	173
YDR049W	46	47	46	76	15	45	75	120	60	116	69	168	364	2191	574	1024	357	1077	24	288	29	174	14	213	7	17	4	52	10	21	16	178	12	94	6	199	35	79	37	115	32	131	58	11	43	28	37	18	58
YDR050C	174	111	90	147	47	84	125	191	137	225	161	281	86	273	112	110	99	132	111	174	30	170	20	99	19	62	6	28	12	35	25	251	17	132	11	241	63	96	58	109	75	228	188	61	100	86	137	141	34
YDR051C	331	295	197	499	85	303	250	578	225	511	280	695	113	297	189	182	126	211	336	967	117	955	61	790	57	411	18	402	27	405	58	583	38	418	30	658	144	256	139	255	145	416	299	159	161	251	222	298	131
YDR054C	207	291	165	379	89	207	220	467	211	441	247	581	208	531	280	184	183	200	261	238	83	138	52	200	41	160	24	177	37	107	54	871	43	462	36	877	177	185	125	228	111	316	483	235	253	358	271	400	113
YDR055W	75	57	37	74	38	45	73	130	76	119	103	135	18	67	24	28	22	84	49	156	23	203	22	233	17	83	9	110	8	47	14	140	12	110	7	141	55	55	52	73	56	109	115	36	71	55	69	95	37
YDR056C	317	293	206	494	102	280	264	545	245	583	298	805	182	864	314	522	223	611	266	1119	110	1028	57	871	67	774	47	819	44	640	68	795	56	395	30	769	164	187	127	188	134	271	521	246	268	391	314	455	247
YDR057W	331	230	204	336	115	202	237	363	192	351	246	479	197	1013	311	418	219	535	93	453	68	308	46	407	63	764	40	942	38	639	59	708	42	364	37	633	140	168	132	163	148	279	458	203	293	326	309	387	151
YDR058C	240	241	174	382	96	244	146	336	134	352	149	450	82	265	118	127	82	106	162	572	54	532	33	425	49	631	30	1068	32	631	67	650	44	372	32	682	146	202	123	235	137	373	374	191	228	279	264	342	200
YDR060W	148	23	101	38	54	17	147	42	141	59	143	68	91	103	167	75	107	43	66	36	54	36	31	45	19	47	31	43	24	19	37	84	19	72	21	93	111	11	91	9	102	10	302	27	184	55	211	48	57
YDR062W	242	192	149	305	84	176	138	253	104	245	122	347	156	564	270	233	185	396	45	155	33	115	24	176	26	152	27	189	27	231	39	460	29	271	13	454	118	138	106	178	115	325	335	114	166	197	205	220	69
YDR063W	255	188	188	320	93	222	197	371	155	400	217	496	180	753	288	310	198	382	180	501	87	403	47	294	57	255	28	280	46	241	59	647	43	384	24	683	183	239	141	254	168	471	452	189	248	309	269	364	100
YDR064W	293	269	176	408	101	224	176	350	156	338	162	479	137	367	211	247	134	195	97	208	56	158	46	214	30	87	25	203	20	61	40	544	30	316	22	543	154	237	141	291	117	432	339	170	231	246	248	300	103
YDR065W	280	286	187	461	98	259	136	305	130	315	142	416	63	114	75	62	49	89	36	359	47	314	33	215	40	376	23	446	20	298	37	638	41	316	19	555	132	156	90	153	97	253	297	195	182	237	205	295	93
YDR067C	363	378	255	600	119	360	252	579	278	593	300	820	111	596	202	268	128	227	277	1434	131	1241	80	1276	61	597	49	655	52	546	73	837	50	439	38	828	192	358	211	373	170	599	537	315	305	417	355	482	304
YDR071C	0	0	0	0	0	0	0	0	0	0	0	0	0	0	0	0	0	0	0	0	0	0	0	0	0	0	0	0	0	0	0	0	0	0	0	0	0	0	0	0	0	0	0	0	0	0	0	0	0
YDR072C	163	128	127	175	43	98	159	226	136	259	148	333	121	238	159	145	123	190	77	222	47	144	34	231	29	78	16	145	15	55	29	367	24	203	22	375	115	155	92	148	84	257	277	86	168	129	188	159	59
YDR073W	59	58	40	58	28	59	40	76	39	63	38	111	67	434	115	131	62	206	53	57	15	43	20	45	11	77	7	143	18	122	16	262	10	122	8	234	55	79	43	107	48	206	105	56	73	79	71	82	57
YDR074W	107	52	76	85	46	55	122	197	107	172	129	257	86	309	156	134	104	188	58	111	29	49	15	41	28	85	13	113	22	88	27	207	20	105	10	160	80	79	79	71	74	123	201	58	128	84	163	116	97
YDR076W	229	210	147	348	92	196	160	312	122	314	158	433	161	1242	258	719	168	755	276	880	52	970	40	881	39	513	33	556	33	484	34	631	44	386	27	735	124	196	121	241	98	340	349	154	160	221	200	310	194
YDR078C	358	353	182	552	98	298	214	437	205	474	207	602	382	2908	584	1455	457	2204	183	1259	97	988	42	976	53	407	31	636	30	466	56	829	46	524	33	809	147	150	105	190	114	291	326	180	180	317	233	313	119
YDR079C-A	207	185	132	309	56	189	170	377	144	428	199	573	74	361	128	228	84	207	208	796	57	628	38	592	24	323	17	307	24	221	38	494	34	323	17	549	106	136	72	139	65	219	184	103	98	162	131	181	69
YDR080W	335	128	194	203	113	111	96	163	67	148	94	222	72	241	126	130	87	179	111	177	35	163	16	177	42	178	18	239	20	281	55	274	35	158	23	289	160	141	120	174	124	286	284	69	173	111	190	142	111
YDR081C	189	110	132	160	69	88	183	324	126	273	149	321	135	623	188	303	132	324	113	315	59	198	32	241	50	280	32	295	23	205	54	420	29	226	23	456	147	115	115	117	117	189	361	104	220	169	226	219	140
YDR083W	161	164	119	286	54	153	91	267	102	247	134	316	151	883	263	418	204	508	106	154	33	196	14	175	17	200	18	107	16	145	30	337	33	170	15	350	101	116	72	119	76	206	214	96	140	156	133	175	115
YDR085C	122	73	96	136	40	76	135	244	99	270	152	344	111	488	168	226	137	257	105	194	54	277	25	173	33	188	18	223	22	139	39	537	33	262	27	493	120	121	101	129	88	225	230	88	134	142	159	141	66
YDR086C	81	75	39	127	20	84	13	44	12	47	20	74	15	76	31	29	25	25	0	250	5	173	6	137	11	181	8	135	5	116	10	143	5	97	2	166	26	56	21	63	15	90	87	47	55	89	57	96	13
YDR087C	32	39	18	64	11	39	19	59	19	54	36	54	73	480	120	245	80	335	16	54	10	29	4	54	3	28	0	38	4	43	5	168	7	75	8	140	17	26	12	42	15	56	111	82	81	110	93	142	11
YDR088C	0	0	2	0	0	0	143	270	101	272	142	325	1	0	0	0	0	0	59	558	51	372	40	358	1	0	0	0	1	0	2	4	0	4	0	10	1	0	2	0	2	0	7	4	5	2	7	5	2
YDR091C	325	325	206	477	94	246	192	440	212	424	209	559	255	1196	286	592	240	658	151	887	80	594	51	584	55	645	35	824	34	611	60	637	41	349	27	673	153	223	128	224	126	355	408	185	272	267	287	325	111
YDR092W_1	104	88	75	161	30	111	54	107	49	110	58	162	14	0	21	0	14	0	43	241	25	135	14	138	22	480	7	474	8	412	18	200	13	88	7	184	52	87	49	115	48	155	145	54	84	80	114	105	96
YDR092W_2	86	72	60	116	23	78	56	86	50	89	66	114	204	1003	340	389	224	604	49	61	24	37	12	53	33	687	11	647	16	514	11	141	10	64	7	146	69	112	60	105	49	194	182	76	106	116	127	100	120
YDR098C	280	218	154	317	96	208	253	336	185	315	214	494	152	328	197	141	137	194	172	478	72	361	40	180	40	239	26	226	33	118	54	729	29	404	24	792	160	186	143	212	127	357	394	173	249	255	303	345	132
YDR099W	231	145	111	239	75	135	194	323	162	263	228	398	108	369	153	164	88	247	137	512	51	376	37	381	48	395	31	378	27	391	32	376	28	176	15	315	109	219	95	197	112	402	267	65	159	109	172	112	53
YDR100W	226	190	142	298	82	200	230	461	209	482	260	641	275	1078	393	548	313	664	171	921	91	743	41	678	46	321	28	372	32	301	49	507	32	266	16	467	191	230	156	260	155	407	435	214	264	328	321	340	116
YDR101C	236	202	189	290	107	174	180	320	171	298	202	416	335	2016	564	1094	368	1217	172	1374	58	1201	53	933	47	584	23	752	24	467	52	534	37	275	21	607	151	190	117	222	113	331	345	166	177	269	236	318	187
YDR103W	346	132	201	158	125	120	204	373	182	321	224	496	160	1080	292	473	152	638	158	931	69	688	37	694	59	747	27	834	40	605	67	323	50	168	33	365	170	156	151	156	147	288	409	93	235	138	276	174	254
YDR104C	243	84	145	151	95	79	144	172	92	192	147	211	30	0	56	0	40	0	72	231	43	217	29	179	59	188	24	256	22	183	47	288	55	176	27	291	165	70	100	74	114	120	394	77	204	102	234	121	107
YDR107C	145	88	95	109	49	61	128	260	131	257	157	353	67	156	103	86	55	131	46	160	47	152	20	196	30	130	22	104	11	147	36	413	30	203	19	375	125	126	115	159	90	219	278	98	151	128	161	153	57
YDR109C	317	203	187	385	105	174	136	204	144	204	151	321	142	966	230	401	217	545	85	722	50	542	37	329	40	460	31	386	29	288	55	690	55	378	30	682	150	191	121	206	152	297	404	183	245	271	254	284	285
YDR110W	306	236	155	407	94	220	135	216	125	215	149	297	83	493	129	163	90	250	136	516	49	407	30	406	34	354	14	368	29	305	36	435	34	230	20	392	135	184	110	200	144	417	248	117	142	178	158	205	136
YDR113C	239	185	181	262	82	158	127	206	135	207	155	267	115	808	205	468	140	627	58	398	54	356	30	302	52	2242	29	2253	27	1989	35	530	42	210	18	455	123	171	114	166	122	320	337	169	229	253	247	319	117
YDR115W	383	333	266	448	106	324	319	642	271	604	312	865	193	819	297	532	190	506	314	1881	148	1322	96	1284	85	1280	35	1459	39	1298	66	924	52	454	28	975	251	344	192	379	179	610	521	225	284	370	343	401	258
YDR116C	169	171	107	276	69	159	115	295	101	316	114	336	180	810	242	479	229	458	61	377	36	397	28	358	37	297	20	263	17	334	35	434	28	193	20	397	106	173	81	160	88	292	284	148	164	189	204	279	53
YDR118W	229	123	129	203	53	107	137	232	109	240	147	291	176	997	303	346	181	481	102	474	45	331	32	241	36	201	20	173	24	131	49	407	34	200	27	390	121	131	107	140	94	182	330	118	187	181	193	233	140
YDR119W	0	0	0	0	0	0	0	0	0	0	0	0	0	0	0	0	0	0	0	0	0	0	0	0	0	0	0	0	0	0	0	0	0	0	0	0	0	0	0	0	0	0	0	0	0	0	0	0	0
YDR120C	158	100	107	153	56	96	135	217	115	250	168	310	209	1985	302	1074	219	1156	92	838	57	732	38	661	42	695	26	904	16	570	40	284	27	202	22	378	106	149	87	164	85	264	319	130	183	190	234	253	154
YDR121W	273	274	174	413	104	234	180	375	167	373	180	519	160	960	284	500	184	556	240	1125	65	775	48	835	39	278	24	420	34	251	42	631	35	302	27	670	185	261	149	297	148	499	444	211	222	342	250	381	97
YDR122W	128	62	89	103	46	48	50	126	43	132	35	158	9	0	24	0	16	7	97	2872	13	2828	8	2722	35	21885	19	20411	17	17988	14	183	7	101	11	187	73	29	54	38	59	58	196	68	126	112	119	120	50
YDR123C	0	1	0	0	0	0	0	0	0	0	0	1	0	0	0	0	0	0	0	0	0	0	0	0	0	0	0	0	0	0	0	0	0	0	0	0	0	0	0	0	0	0	0	0	0	1	0	0	0
YDR124W	34	45	27	38	15	18	53	80	41	76	45	90	5	0	13	0	3	0	16	114	14	82	9	157	15	113	12	144	4	50	7	119	7	67	4	120	34	30	16	29	12	57	55	29	32	33	40	42	14
YDR125C	281	221	197	346	89	214	182	406	128	392	177	545	153	600	220	349	146	390	270	915	59	841	44	831	73	1524	35	1510	37	1089	48	829	29	404	27	664	133	237	122	270	118	469	307	169	197	232	212	292	117
YDR128W	0	0	0	0	0	0	0	0	0	0	0	0	0	0	0	0	0	0	0	0	0	0	0	0	0	0	0	0	0	0	0	0	0	0	0	0	0	0	0	0	0	0	0	0	0	0	0	0	0
YDR130C	0	0	0	0	0	0	0	0	0	0	0	0	0	0	0	0	0	0	0	0	0	0	0	0	0	0	0	0	0	0	0	0	0	0	0	0	0	0	0	0	0	0	0	0	0	0	0	0	0
YDR131C	0	0	0	0	0	0	0	0	0	0	0	0	0	0	0	0	0	0	0	0	0	0	0	0	0	0	0	0	0	0	0	0	0	0	0	0	0	0	0	0	0	0	0	0	0	0	0	0	0
YDR138W	258	206	154	309	87	170	137	223	105	217	130	287	228	1140	298	526	231	759	177	530	52	334	22	313	40	188	21	217	30	188	58	525	36	318	22	596	148	223	140	194	131	284	355	153	247	220	234	262	99
YDR139C	21	20	14	26	4	19	276	585	248	586	252	801	5	0	8	0	8	0	181	962	104	1005	67	729	13	98	1	38	6	41	5	129	6	58	4	118	9	12	16	17	12	33	16	6	11	6	12	10	6
YDR141C	89	12	41	26	23	18	156	159	124	178	167	171	32	153	66	73	38	66	66	129	38	97	28	96	12	44	8	40	9	37	14	87	11	63	7	119	34	24	32	18	26	15	59	13	44	12	39	24	51
YDR142C	235	229	136	248	65	186	121	211	133	240	131	390	54	167	74	87	36	87	182	527	42	466	18	531	29	268	11	423	24	297	31	540	31	241	20	656	103	68	76	160	53	279	257	148	93	134	176	194	35
YDR144C	345	301	178	510	125	306	154	351	145	285	171	434	34	17	68	0	38	0	84	410	49	324	41	298	40	350	37	422	35	258	53	537	35	290	23	542	186	219	153	266	144	418	432	198	247	338	309	364	175
YDR146C	208	123	115	180	70	114	184	270	161	286	159	347	110	372	193	215	123	258	115	297	52	286	33	292	32	249	12	144	21	178	39	374	30	185	20	348	106	91	120	103	64	152	221	83	150	178	144	173	67
YDR147W	187	144	128	191	77	92	124	283	107	285	126	377	190	754	270	366	203	388	98	176	61	153	30	210	52	569	19	644	27	577	32	480	34	230	16	498	114	163	98	140	90	282	300	111	159	166	177	195	130
YDR148C	71	38	46	68	20	36	178	391	158	408	214	527	9	0	16	0	17	0	160	783	88	517	56	484	28	518	22	681	16	527	7	146	8	87	7	174	64	94	51	82	66	135	99	41	70	65	75	78	18
YDR150W	0	0	0	0	0	0	0	0	0	0	0	0	0	0	0	0	0	0	0	0	0	0	0	0	0	0	0	0	0	0	0	0	0	0	0	0	0	0	0	0	0	0	0	0	0	0	0	0	0
YDR153C	8	1	6	0	3	0	39	63	30	60	38	97	5	0	8	0	1	0	37	0	5	0	11	0	4	19	4	22	1	12	2	9	2	5	1	12	13	9	4	5	8	12	22	0	3	3	12	3	6
YDR155C	0	0	0	0	0	0	0	0	0	0	0	0	0	0	0	0	0	0	0	0	0	0	0	0	0	0	0	0	0	0	0	0	0	0	0	0	0	0	0	0	0	0	0	0	0	0	0	0	0
YDR156W	215	150	158	211	48	116	57	141	53	134	70	195	196	1093	287	552	212	655	78	273	25	207	14	178	52	386	27	381	34	293	63	722	32	367	22	693	158	206	126	207	157	351	377	183	232	296	253	332	134
YDR159W	270	133	154	250	76	112	56	103	50	118	79	139	28	0	59	0	47	0	30	93	19	43	13	56	47	281	25	259	32	243	57	366	18	214	24	400	159	131	139	147	137	220	388	68	250	122	267	143	73
YDR162C	185	106	118	165	50	110	121	202	101	200	132	275	244	1283	392	642	219	918	60	380	51	404	22	215	40	246	23	168	20	187	36	590	33	283	19	582	106	165	102	137	84	245	330	151	177	253	234	324	181
YDR164C	230	169	122	257	82	130	110	187	107	232	154	304	20	1	59	1	37	1	75	299	53	214	28	212	36	236	17	212	25	207	28	203	16	135	15	221	93	89	70	118	87	175	208	84	123	95	126	124	126
YDR166C	361	141	230	251	116	106	304	441	250	491	341	582	278	966	409	515	285	546	187	434	108	298	47	248	66	365	41	256	39	215	58	598	52	262	38	494	254	259	236	248	192	401	611	184	370	295	400	320	250
YDR168W	0	0	1	0	0	0	0	0	0	0	0	0	0	0	0	0	0	0	0	0	0	0	0	0	0	0	0	0	0	0	1	2	0	3	0	0	0	0	0	0	0	0	0	0	0	0	0	0	0
YDR169C-A	172	138	138	218	65	118	104	181	88	182	129	254	185	1418	216	675	202	803	59	396	31	260	36	279	39	444	10	516	25	344	36	494	20	260	19	493	98	205	97	204	79	340	298	164	162	297	205	306	56
YDR171W	421	234	232	335	157	206	162	278	131	244	154	293	109	276	163	272	98	306	117	519	46	561	34	504	50	619	27	427	32	292	44	575	46	281	27	567	176	144	129	131	112	238	309	121	224	240	225	243	214
YDR175C	34	13	13	18	2	8	18	17	21	17	23	30	7	8	13	4	2	6	31	14	9	4	0	26	5	26	4	50	0	20	2	21	3	9	0	53	15	5	10	6	4	41	15	1	6	3	12	6	5
YDR177W	190	159	120	223	46	105	78	107	70	123	91	148	217	1318	328	616	231	833	90	428	36	444	22	250	27	140	12	133	17	205	25	251	24	166	14	327	89	185	68	174	95	259	294	153	161	223	200	231	209
YDR179C	77	59	57	71	21	51	294	761	259	762	341	972	12	0	11	0	12	0	323	1872	108	1434	52	1363	18	262	14	212	16	212	27	312	27	169	17	313	63	100	43	129	54	161	98	28	46	67	71	61	71
YDR180W	57	27	32	26	19	15	72	83	63	90	76	94	3	0	8	0	8	0	34	64	35	53	15	62	10	13	0	10	2	13	7	20	4	8	0	8	20	9	17	7	17	18	35	6	21	11	25	7	8
YDR181C	211	179	118	333	66	198	154	353	184	332	186	467	89	458	152	218	103	244	87	569	72	509	48	335	35	212	22	356	27	238	38	428	26	285	17	481	129	213	121	233	116	355	246	95	156	167	165	201	222
YDR183W	99	109	56	158	31	93	56	124	42	123	68	180	59	126	85	95	57	174	65	252	27	143	10	186	10	40	2	29	3	16	8	151	17	84	7	207	49	59	32	81	42	102	111	42	67	65	74	74	66
YDR184C	39	34	39	37	19	29	65	116	60	113	69	140	7	17	26	6	8	24	152	198	30	156	12	148	7	33	5	25	4	35	6	76	8	46	2	67	30	21	19	8	13	23	51	16	28	28	45	28	4
YDR186C	177	104	114	191	71	100	94	95	80	111	82	126	85	344	131	140	98	167	64	74	28	18	21	96	22	23	12	35	11	36	14	135	14	70	11	123	79	27	55	25	56	29	96	26	51	63	67	48	52
YDR191W	139	97	72	145	42	91	72	90	61	104	67	125	56	296	71	177	62	165	45	398	36	273	31	296	18	94	8	94	4	79	17	128	15	96	9	199	49	53	58	47	41	81	184	103	114	149	133	151	25
YDR192C	0	0	0	0	0	0	0	0	0	0	0	0	0	0	0	0	0	0	0	0	0	0	0	0	0	0	0	0	0	0	0	0	0	0	0	0	0	0	0	0	0	0	0	0	0	0	0	0	0
YDR194C	116	35	64	65	54	41	43	42	33	26	42	36	35	14	56	6	21	12	52	48	11	22	5	47	30	60	15	22	18	36	22	83	11	41	9	72	79	72	65	74	73	101	67	5	42	9	47	8	75
YDR194W-A	121	104	63	145	32	97	59	127	47	114	92	239	69	555	126	316	88	353	77	352	21	311	14	248	22	243	5	195	20	216	36	380	20	201	14	393	67	119	76	121	81	134	153	85	102	142	116	177	53
YDR195W	202	102	134	169	63	110	53	56	46	45	53	66	192	728	265	425	196	407	27	2	12	25	13	0	53	356	36	325	38	256	87	732	71	364	33	640	147	125	146	176	144	264	128	54	76	62	91	68	196
YDR196C	0	0	0	0	0	0	0	0	0	0	0	0	0	0	0	0	0	0	0	0	0	0	0	0	0	0	0	0	0	0	0	0	0	0	0	0	0	0	0	0	0	0	0	0	0	0	0	0	0
YDR197W	295	256	191	346	109	241	217	373	197	348	228	513	154	669	233	326	162	408	213	500	92	487	52	558	38	336	18	391	34	363	63	636	45	293	25	615	162	149	143	209	137	309	403	165	243	306	310	344	206
YDR198C	327	169	187	288	83	167	137	212	104	214	133	267	208	537	290	317	202	332	91	224	50	158	44	177	62	293	42	358	38	251	57	769	55	393	34	772	230	174	192	237	156	369	184	64	110	106	139	126	228
YDR200C	214	258	140	390	81	204	181	450	163	408	195	530	71	277	88	142	73	116	327	2897	69	2224	40	2309	44	413	13	528	32	464	30	562	20	287	23	532	138	279	119	303	90	544	288	177	174	267	194	321	137
YDR201W	130	98	83	161	36	98	130	214	111	219	121	292	135	815	245	552	154	604	93	188	56	159	31	108	28	176	22	314	16	219	29	334	27	206	9	314	109	157	77	160	77	243	162	85	112	137	116	158	82
YDR202C	260	178	143	290	84	161	138	345	133	329	159	449	312	1712	460	760	257	921	168	659	52	524	29	435	36	248	26	240	37	246	36	548	22	260	24	497	124	174	116	191	132	330	351	188	235	295	259	366	182
YDR204W	0	0	0	0	0	0	0	0	0	0	0	0	0	0	0	0	0	0	0	0	0	0	0	0	0	0	0	0	0	0	0	0	0	0	0	0	0	0	0	0	0	0	0	0	0	0	0	0	0
YDR205W	108	46	48	70	36	48	48	74	43	65	51	107	77	353	147	205	80	221	34	57	10	80	7	100	24	137	12	90	18	91	22	183	19	100	11	230	82	74	49	88	65	133	159	50	67	77	116	94	33
YDR208W	143	69	92	110	42	64	48	81	45	67	44	87	15	0	28	0	25	0	8	134	9	64	9	42	27	181	20	272	22	154	38	223	23	141	13	229	81	20	51	26	49	28	244	62	144	73	160	128	79
YDR212W	0	0	0	0	0	0	0	0	1	0	2	3	0	0	0	0	0	0	0	0	0	0	0	0	0	0	0	0	0	0	0	0	0	0	0	0	2	0	0	0	1	0	2	0	0	1	0	0	0
YDR213W	224	122	119	229	75	156	145	252	113	232	150	310	79	470	126	243	98	319	67	224	44	266	45	284	47	172	24	113	16	87	39	435	36	182	30	321	156	124	115	95	112	212	148	29	91	54	99	70	64
YDR214W	222	192	123	269	66	164	93	189	84	174	126	243	65	134	79	76	77	148	50	51	28	12	16	45	18	185	19	125	19	124	37	363	27	191	11	356	115	100	72	97	71	152	262	131	156	172	176	240	46
YDR218C	193	154	129	264	76	152	127	231	118	209	128	300	357	2134	570	1176	367	1344	136	478	67	391	28	437	52	202	22	377	19	265	43	645	45	317	29	674	112	133	105	151	96	232	291	137	186	208	209	235	135
YDR219C	306	208	171	288	75	195	184	347	158	346	213	443	43	56	71	20	39	52	168	343	51	358	36	349	30	227	22	216	23	176	39	465	40	218	18	433	150	194	121	173	149	270	319	132	191	225	236	266	59
YDR222W	195	188	91	267	69	123	78	154	71	163	72	262	141	741	242	362	148	456	25	332	24	241	16	339	29	297	16	311	11	286	24	344	19	171	21	403	104	156	92	163	66	294	233	104	106	152	168	155	36
YDR223W	296	233	180	391	115	250	138	128	112	127	137	163	155	700	286	293	169	304	6	147	40	81	23	98	51	279	34	318	25	208	65	745	52	378	34	764	142	98	109	103	117	154	149	60	83	94	113	103	156
YDR224C_1	789	690	422	1133	260	543	292	492	248	570	286	774	310	1563	496	704	359	1067	387	1512	105	1187	53	812	104	1090	67	1487	57	913	143	2113	131	925	87	2388	381	591	357	634	316	1169	1438	610	671	1069	878	1139	386
YDR224C_2	157	77	103	165	55	103	151	272	146	247	161	330	64	168	88	93	71	114	75	276	64	170	33	315	38	197	14	318	20	264	36	362	34	183	18	371	111	185	101	144	77	278	345	136	190	210	217	215	99
YDR228C	223	171	134	289	63	145	244	381	169	420	244	515	125	573	161	284	118	251	176	697	83	437	39	687	64	916	30	1160	39	771	42	624	42	325	34	595	156	188	118	183	107	249	293	144	174	182	195	216	168
YDR229W	280	177	128	310	91	191	132	253	119	263	152	350	95	289	139	150	108	160	201	915	67	837	40	884	35	385	23	303	23	389	43	273	26	150	14	316	115	167	87	157	105	211	236	118	153	163	189	194	197
YDR231C	51	32	48	38	24	26	214	393	193	357	244	460	6	0	24	0	9	0	138	975	66	905	65	590	12	64	8	72	16	59	11	189	11	92	8	208	60	52	38	66	62	86	45	21	36	31	41	32	107
YDR232W	192	114	119	150	54	95	135	172	97	185	129	240	55	83	81	60	63	52	32	276	32	266	29	158	31	213	14	277	24	271	29	368	26	204	13	429	151	112	106	140	95	217	331	138	183	190	222	231	70
YDR234W	163	110	123	185	65	105	78	137	81	127	85	180	73	172	103	96	75	153	135	610	28	288	23	180	26	42	16	14	18	64	24	332	28	225	22	389	111	124	69	107	84	161	293	108	167	196	187	183	42
YDR236C	353	256	193	392	101	213	200	392	189	402	216	549	61	122	93	138	73	108	183	692	70	578	28	356	38	449	26	403	37	324	54	562	35	281	28	609	172	198	140	227	105	408	337	172	187	242	274	303	161
YDR238C	53	35	58	63	21	38	42	63	41	34	48	79	10	0	17	0	17	0	0	69	23	40	10	53	13	97	7	144	17	99	19	195	21	87	12	180	55	22	36	48	52	60	110	34	46	42	82	55	28
YDR240C	416	401	266	529	152	340	247	498	203	442	259	642	221	1033	298	482	276	590	143	762	82	793	52	570	59	339	44	375	36	441	65	860	63	488	51	908	172	268	165	284	212	488	565	253	313	388	374	462	194
YDR242W	331	288	150	368	92	224	121	205	106	210	136	285	33	6	42	0	25	4	71	356	37	223	18	239	41	411	29	530	17	404	34	386	26	195	18	417	141	179	124	227	103	394	300	99	157	122	217	204	54
YDR243C	298	244	176	373	103	218	189	321	134	309	184	409	288	1070	479	670	277	820	197	657	58	476	42	515	48	309	31	350	36	350	51	614	41	335	23	670	164	240	172	250	156	374	430	220	247	303	333	376	169
YDR244W	76	79	41	110	24	54	175	334	140	316	170	434	14	0	14	0	6	0	232	786	57	556	39	600	14	198	12	217	5	182	12	97	14	49	5	84	66	130	66	130	44	258	92	26	42	45	48	46	13
YDR246W-A	43	43	32	73	12	48	24	40	16	34	23	61	79	345	104	193	68	213	39	370	11	201	1	166	8	57	3	103	5	38	7	119	7	55	5	82	23	89	46	95	43	155	77	42	36	63	56	68	39
YDR247W	159	91	109	163	61	124	73	132	61	133	60	178	20	3	29	0	23	0	45	135	21	138	16	94	37	319	22	479	21	338	28	221	23	129	12	223	131	186	102	210	83	417	209	76	138	103	139	130	23
YDR248C	0	0	0	0	0	0	0	0	0	0	0	0	0	0	0	0	0	0	0	0	0	0	0	0	0	0	0	0	0	0	0	0	0	0	0	0	0	0	0	0	0	0	0	0	0	0	0	0	0
YDR249C	121	123	84	187	40	95	87	104	69	92	84	119	10	0	26	0	21	0	74	349	33	247	19	194	14	118	18	125	14	94	20	198	16	110	13	212	73	90	58	79	51	145	175	62	80	124	92	118	43
YDR252W	128	94	98	147	51	108	136	214	117	276	136	383	182	1121	358	504	205	565	210	830	42	695	26	849	32	670	14	909	19	521	19	280	15	184	12	441	73	101	58	88	63	182	134	73	71	92	104	120	64
YDR253C	251	242	131	377	79	196	145	299	134	301	152	414	92	729	163	306	100	357	127	801	57	741	37	594	38	364	16	453	28	351	31	408	28	252	12	466	98	93	83	112	82	173	267	117	147	188	190	221	107
YDR254W	326	374	211	525	133	297	272	574	265	540	262	717	138	455	227	260	170	396	179	962	127	883	83	778	65	488	34	598	40	388	75	972	73	543	36	1078	200	222	183	250	142	361	578	272	325	392	370	464	218
YDR256C	511	518	322	787	160	478	128	223	103	238	112	301	264	1384	391	694	297	826	76	376	47	214	29	281	75	907	38	1062	53	795	82	1125	63	593	46	1145	230	321	208	330	188	538	917	482	495	666	579	826	239
YDR257C	8	0	0	0	1	0	8	2	11	8	12	7	0	0	0	0	0	0	8	139	10	126	2	96	0	40	0	15	0	23	0	28	0	5	3	49	7	0	4	6	1	18	16	7	1	2	9	14	0
YDR258C	0	0	0	0	1	0	0	0	0	0	0	0	16	75	23	15	13	53	0	0	0	0	0	0	0	0	0	0	0	0	0	0	0	0	0	0	0	0	0	0	0	0	3	2	4	0	5	4	0
YDR259C	131	88	101	153	55	76	110	226	112	210	123	290	176	1035	267	490	176	776	98	859	40	498	33	574	30	274	18	483	35	418	26	458	26	234	14	490	96	98	98	106	81	191	262	125	147	161	195	229	171
YDR261C	118	111	81	138	44	86	113	290	90	247	109	338	109	558	144	394	99	391	140	942	62	777	34	529	19	302	19	375	21	275	35	469	28	297	26	466	105	193	90	187	88	327	294	166	164	251	217	286	121
YDR262W	141	147	127	235	70	136	74	135	45	152	64	174	87	277	146	124	100	231	67	193	26	158	24	111	23	308	17	239	24	193	45	449	27	275	19	463	100	144	91	159	91	208	245	115	150	185	159	197	147
YDR263C	99	110	52	121	33	76	61	102	47	101	53	150	224	1225	321	637	240	677	80	573	26	487	7	254	20	238	13	169	16	131	20	218	15	114	12	250	49	35	42	36	39	69	167	76	112	155	107	150	51
YDR264C	15	4	8	7	2	2	20	54	14	42	28	65	4	0	4	0	2	0	8	37	7	61	5	70	3	10	0	32	3	19	5	35	2	12	2	61	12	16	10	16	10	35	29	11	18	9	15	16	16
YDR265W	136	135	100	197	62	128	124	190	81	186	123	235	198	941	288	394	194	592	75	262	35	235	31	306	28	200	23	221	17	242	44	583	37	290	29	612	111	118	95	148	95	221	293	124	175	211	176	223	155
YDR266C	187	121	105	230	66	143	91	178	76	147	71	221	238	1092	376	467	242	625	45	156	25	92	16	55	20	68	10	38	23	45	16	175	15	96	13	158	96	75	58	91	63	169	275	105	158	117	149	145	88
YDR272W	56	42	35	63	11	34	65	141	59	143	66	183	5	0	10	0	7	0	107	198	22	100	13	99	7	43	5	64	5	48	7	135	10	65	6	131	34	19	17	14	9	25	113	50	48	81	61	84	75
YDR277C	116	93	78	130	48	82	159	247	109	273	152	359	126	650	197	322	112	321	170	563	57	421	32	399	33	442	25	513	27	503	26	219	18	103	11	210	102	207	97	230	94	357	250	95	141	159	171	159	61
YDR280W	199	189	121	274	62	159	255	638	245	575	283	804	33	3	45	6	35	3	260	839	107	769	73	813	42	297	25	412	34	301	51	491	31	288	24	567	135	170	114	239	122	338	262	171	180	285	195	280	232
YDR282C	1	0	0	0	1	0	1	2	4	1	2	5	0	0	1	0	0	0	0	0	0	0	2	0	0	0	0	0	0	0	0	0	1	0	0	0	4	11	0	10	3	22	3	6	4	10	2	9	1
YDR283C	75	30	57	45	28	16	64	42	49	52	71	71	11	0	21	0	11	0	26	145	12	65	11	24	22	67	7	61	7	24	15	54	6	25	9	47	56	25	49	26	51	37	108	15	79	23	84	21	34
YDR285W	124	73	63	97	46	58	52	113	58	118	62	167	30	316	85	103	42	85	108	97	17	37	3	61	19	202	12	133	12	95	20	148	13	93	13	242	72	47	72	87	44	122	155	59	55	27	93	78	43
YDR288W	276	294	170	395	87	250	211	394	162	378	208	479	426	2412	615	1277	434	1601	244	968	64	856	53	752	50	613	29	594	32	497	38	604	29	299	15	558	143	202	124	235	137	375	357	158	210	228	224	296	107
YDR289C	103	118	57	188	42	100	51	64	49	75	51	116	21	0	24	0	10	0	21	69	13	30	17	41	16	264	12	209	15	185	16	266	21	147	7	279	39	35	38	39	56	62	164	57	74	92	99	110	57
YDR292C	178	136	109	183	51	109	185	337	164	314	190	368	17	0	24	0	19	0	176	596	70	483	56	582	29	93	9	123	16	107	31	401	27	237	19	450	62	64	80	76	48	112	116	55	75	100	97	83	115
YDR294C	120	114	62	153	39	107	34	73	36	79	40	94	93	398	150	212	115	252	30	130	18	133	13	126	16	111	9	81	9	80	23	193	19	120	11	194	68	109	76	102	59	181	194	101	123	144	151	165	64
YDR295C	99	82	57	76	25	45	89	172	64	166	89	219	7	0	17	0	16	0	85	44	33	15	26	32	15	62	8	110	15	98	22	281	23	96	14	250	56	82	47	78	44	151	108	27	63	50	77	60	34
YDR296W	165	133	89	201	48	126	168	325	145	328	148	432	43	55	70	48	50	17	195	494	60	500	43	619	34	331	20	274	28	265	31	492	26	292	15	616	99	135	96	133	88	208	287	158	188	249	207	259	121
YDR297W	85	76	60	113	30	67	59	57	64	65	84	86	107	673	139	364	123	306	36	171	20	94	14	84	21	146	16	148	14	219	30	285	12	119	9	268	52	61	40	58	54	92	201	77	125	131	97	175	62
YDR299W	327	232	210	364	125	220	245	490	239	480	291	577	182	681	262	411	207	392	222	389	93	388	70	407	48	96	32	206	31	149	83	672	58	379	33	691	183	176	144	180	166	276	483	190	298	300	386	340	216
YDR300C	1	1	0	0	0	0	0	0	0	0	0	0	0	0	0	0	0	0	0	0	0	0	0	0	0	0	0	0	0	0	0	0	0	0	0	0	0	0	0	0	0	0	0	1	0	0	0	0	0
YDR301W	174	171	117	295	69	173	75	95	85	124	84	124	89	359	152	203	90	244	43	294	19	197	28	286	30	124	20	178	24	158	29	410	26	235	19	500	122	161	102	235	112	258	297	120	176	221	180	234	137
YDR303C	169	89	93	120	57	67	112	138	99	146	135	186	13	4	43	4	32	3	119	479	44	364	18	315	27	131	13	184	18	199	29	226	22	127	15	268	85	47	67	52	73	94	225	43	102	73	135	83	48
YDR304C	463	479	297	878	152	510	41	68	43	88	36	140	296	1159	469	652	305	739	98	182	17	262	13	213	71	1098	44	1368	34	776	98	1323	78	754	61	1291	264	500	230	508	186	893	752	452	390	687	564	799	332
YDR306C	71	39	43	58	27	25	160	254	129	221	160	391	35	142	67	74	48	88	164	195	38	154	27	262	11	96	13	91	14	44	10	145	16	87	8	166	55	37	44	24	50	63	105	22	49	39	68	56	68
YDR307W	138	98	90	147	39	88	96	164	80	142	99	185	127	299	194	214	143	246	51	157	35	128	30	110	20	106	18	95	12	62	27	276	22	133	13	297	85	151	111	170	88	210	225	81	115	172	167	187	50
YDR308C	304	309	199	434	80	248	222	366	160	379	209	484	226	754	333	348	217	387	101	146	67	180	46	196	62	566	31	633	38	531	58	640	33	331	23	641	164	232	164	243	115	437	362	149	228	204	252	217	216
YDR309C	131	46	74	99	48	55	138	160	101	185	132	208	18	0	23	0	15	0	96	506	44	328	27	397	25	134	12	216	18	106	31	245	22	127	19	246	114	67	82	85	66	142	211	78	97	113	146	130	100
YDR310C	31	4	24	6	11	1	45	70	56	90	65	95	6	0	19	0	9	0	63	136	26	135	13	208	9	109	6	133	9	59	19	177	7	65	2	121	35	16	39	28	28	36	113	24	52	35	67	67	33
YDR311W	73	59	40	104	25	50	33	53	31	57	44	87	2	0	9	0	4	0	31	170	15	88	12	67	11	151	6	96	5	100	9	93	10	73	6	91	32	17	21	22	27	49	59	16	32	29	40	34	20
YDR312W	5	0	2	0	1	0	4	8	5	5	2	5	1	0	1	0	2	0	13	87	1	50	0	50	0	0	1	0	0	0	0	8	0	1	0	14	7	15	2	16	2	18	0	0	2	0	3	1	1
YDR314C	124	63	69	80	36	66	111	179	101	164	114	210	47	121	85	70	51	133	91	554	52	360	33	226	19	252	11	246	11	194	27	210	16	113	13	230	61	67	61	56	46	75	163	82	97	106	118	106	40
YDR316W	57	46	50	99	19	68	65	120	74	118	62	131	9	0	19	0	11	0	113	191	12	180	8	153	11	23	8	88	6	17	20	153	11	88	7	163	34	23	29	23	24	42	130	58	56	86	72	75	33
YDR317W	173	116	112	176	55	83	91	130	102	184	115	262	15	0	39	0	15	1	96	313	27	297	19	285	21	184	16	290	8	205	28	254	19	137	14	353	88	49	48	84	37	176	210	66	87	80	128	182	48
YDR319C	229	269	184	437	97	243	86	201	74	194	90	241	72	363	111	231	82	216	97	277	43	161	19	157	46	607	26	582	29	468	63	678	35	357	34	726	105	154	106	156	100	285	199	107	148	196	165	229	156
YDR320C	97	51	68	111	48	42	85	120	65	129	86	185	72	358	96	129	74	185	33	76	27	89	18	124	16	145	18	169	15	102	35	318	26	187	15	393	84	117	90	142	96	185	223	83	134	123	162	165	35
YDR321W	47	63	28	79	17	60	19	22	9	21	22	34	79	520	128	192	72	180	13	77	9	30	6	24	13	44	3	14	3	31	14	125	8	64	8	141	36	60	28	68	45	121	81	37	45	50	53	60	16
YDR322W	219	215	142	360	66	214	180	309	132	279	154	377	199	551	309	365	221	469	182	1301	61	940	24	863	47	658	22	680	19	589	33	507	29	219	25	492	104	158	92	198	93	303	300	153	160	241	206	251	100
YDR323C	134	80	70	152	54	70	89	174	77	181	81	250	63	246	84	121	52	137	70	168	22	106	21	153	23	161	11	161	20	124	24	261	12	101	11	231	67	73	55	89	66	144	209	93	114	152	139	201	84
YDR324C	331	239	189	401	126	209	205	359	205	388	233	419	72	273	136	72	106	179	156	274	72	252	44	205	47	225	14	429	30	337	48	595	45	303	33	565	142	117	130	164	116	235	415	148	236	239	260	251	99
YDR325W	143	42	90	45	45	32	122	166	109	179	139	259	208	1064	312	624	250	747	134	178	43	166	30	145	26	167	24	229	27	168	34	282	33	131	20	293	106	88	102	92	79	169	266	72	167	142	178	141	80
YDR330W	117	89	99	149	53	86	144	297	144	292	165	412	67	298	95	152	67	205	117	604	68	413	37	289	34	228	18	311	17	195	25	331	11	169	10	290	81	87	79	98	79	173	192	77	115	128	136	153	84
YDR331W	0	0	0	0	0	0	0	0	0	0	0	0	0	0	0	0	0	0	0	0	0	0	0	0	0	0	0	0	0	0	0	0	0	0	0	0	0	0	0	0	0	0	0	0	0	0	0	0	0
YDR332W	25	7	15	11	10	11	42	99	39	115	57	136	3	0	18	0	8	0	11	167	19	146	14	139	6	49	2	35	9	59	9	81	4	39	5	54	33	55	27	41	24	57	59	15	36	17	35	19	3
YDR333C	208	150	130	216	63	147	108	192	104	196	109	264	113	365	172	221	119	259	96	110	43	74	22	165	27	193	26	248	31	131	35	284	29	158	16	289	116	125	121	126	93	170	240	81	153	161	178	180	141
YDR337W	0	0	0	0	0	0	0	0	0	0	0	0	0	0	0	0	0	0	0	0	0	0	0	0	0	0	0	0	0	0	0	0	0	0	0	0	0	0	0	0	0	0	0	0	0	0	0	0	0
YDR339C	110	94	91	117	56	75	127	189	83	196	130	239	120	700	157	274	149	362	36	259	43	214	28	206	25	184	20	287	27	230	29	403	25	207	12	440	80	76	71	75	77	146	258	116	152	170	180	218	94
YDR346C	132	104	79	155	48	92	74	181	77	136	65	181	212	1441	290	759	219	905	90	325	27	345	18	278	15	129	10	172	21	191	24	247	28	142	10	246	72	181	79	138	71	264	290	115	168	199	197	247	124
YDR347W	321	277	189	413	81	245	199	408	170	364	223	570	114	583	208	241	130	313	223	1228	78	929	44	799	55	387	35	403	24	497	52	663	35	410	25	781	179	225	141	245	184	406	428	213	247	316	312	395	179
YDR349C	0	0	0	0	0	0	0	0	0	0	0	0	0	0	0	0	0	0	0	0	0	0	0	0	0	0	0	0	0	0	0	0	0	0	0	0	0	0	0	0	0	0	0	0	0	0	0	0	0
YDR350C	138	139	71	184	73	137	86	138	98	148	98	220	16	0	38	0	20	0	81	308	25	254	14	213	14	230	16	230	8	169	24	308	24	148	20	399	113	66	88	134	31	260	214	125	66	94	131	141	52
YDR352W	152	139	110	259	59	130	125	199	88	237	127	288	151	673	245	380	162	370	65	221	51	182	20	178	22	144	13	202	19	133	33	445	34	233	22	467	103	104	77	126	68	183	224	123	148	185	178	241	128
YDR353W	184	198	120	279	59	170	113	180	92	195	98	269	309	1654	485	940	361	1017	76	83	42	92	24	144	35	222	15	245	22	230	35	367	20	192	18	364	100	141	102	124	78	205	267	126	164	195	172	231	119
YDR354W	221	216	120	271	69	164	151	259	119	262	149	332	50	165	103	81	84	93	95	419	62	350	36	273	44	477	34	682	24	420	27	498	28	286	22	498	107	88	89	99	85	146	330	95	175	212	238	209	127
YDR356W	179	41	109	89	55	46	69	96	59	81	76	116	201	785	313	379	214	521	44	197	22	143	25	92	26	110	26	259	22	122	43	196	38	119	24	194	123	117	129	89	90	180	312	58	172	91	198	128	177
YDR358W	0	0	0	0	0	0	0	0	0	0	0	0	0	0	0	0	0	0	0	0	0	0	0	0	0	0	0	0	0	0	0	0	0	0	0	0	0	0	0	0	0	0	0	0	0	0	0	0	0
YDR359C	19	6	9	19	3	7	3	11	2	12	3	17	1	0	0	0	2	0	0	0	0	0	0	0	2	7	0	10	0	0	4	9	2	5	0	9	5	8	2	13	8	25	12	1	8	6	7	6	0
YDR361C	0	0	0	0	0	0	0	0	0	0	0	0	0	0	0	0	0	0	0	0	0	0	0	0	0	0	0	0	0	0	0	0	0	0	0	0	0	0	0	0	0	0	0	0	0	0	0	0	0
YDR362C	18	6	9	11	4	6	39	70	26	74	28	67	9	0	4	0	2	0	22	19	14	24	5	32	3	7	2	8	2	17	2	28	1	17	2	26	15	16	8	11	6	36	20	3	12	5	19	15	27
YDR364C	80	64	39	116	34	60	31	61	28	86	16	99	41	239	59	101	63	128	30	19	17	16	5	12	11	64	9	77	8	79	13	151	17	79	6	143	44	64	34	55	25	79	179	64	115	97	131	113	86
YDR367W	261	240	183	407	111	217	207	453	156	431	198	596	140	1065	255	446	169	498	163	621	78	583	40	620	58	652	25	625	27	536	45	553	28	284	27	494	85	144	98	117	98	266	372	231	210	290	255	370	144
YDR369C	192	122	116	185	68	103	83	179	70	167	90	181	306	1726	480	775	362	913	57	179	33	110	18	112	40	360	19	510	28	324	26	230	22	134	15	222	148	155	126	176	101	283	350	97	197	138	223	170	62
YDR370C	208	255	137	377	95	237	244	617	170	561	222	736	60	222	71	68	45	107	361	4614	139	3722	66	3433	112	3140	47	3495	60	3148	41	658	25	361	26	778	136	283	107	289	114	463	293	225	169	298	199	323	283
YDR372C	116	81	76	140	31	73	176	324	139	333	172	446	7	0	16	0	18	0	123	336	58	238	42	277	12	81	7	65	6	38	18	128	9	75	4	118	46	61	38	60	34	120	50	18	28	24	39	26	73
YDR373W	187	166	123	289	72	180	209	418	220	429	215	642	170	898	251	380	189	482	222	1169	78	1063	48	919	40	286	23	338	23	244	62	608	33	329	26	643	142	221	123	227	107	444	273	146	173	151	217	241	95
YDR375C	114	70	79	106	42	58	124	256	102	274	151	307	23	2	47	4	28	5	114	143	49	120	32	148	25	274	13	340	13	228	34	346	15	187	5	330	90	241	73	188	75	294	182	76	129	142	129	163	131
YDR376W	255	280	167	419	94	262	210	386	162	383	212	466	59	100	78	65	56	42	188	470	77	608	49	387	43	383	31	433	28	304	47	639	38	362	28	664	129	160	134	188	121	310	411	156	210	261	260	326	82
YDR377W	230	187	198	276	74	187	131	339	126	285	146	397	196	1162	318	518	214	651	58	285	40	289	35	203	34	350	27	322	25	448	39	537	29	282	33	590	153	99	111	119	115	216	353	194	202	269	256	276	70
YDR378C	235	182	135	239	75	161	216	496	210	496	261	608	164	840	259	331	185	481	132	553	97	366	60	392	59	443	29	617	24	480	79	1059	56	564	42	1121	178	231	179	250	136	421	475	211	250	394	270	371	236
YDR379C-A	200	198	119	349	76	221	152	298	147	307	153	417	172	994	255	364	190	446	222	891	54	530	27	529	38	690	26	586	27	661	36	626	35	306	22	693	159	245	134	333	115	485	257	136	144	167	203	199	132
YDR381W	195	144	118	252	57	134	133	221	140	267	167	330	145	716	228	386	128	449	123	331	51	216	33	201	26	272	24	246	21	185	28	443	33	265	14	458	131	189	101	207	114	313	300	113	171	187	194	199	65
YDR383C	284	329	174	462	117	258	165	385	141	410	198	599	301	2424	507	1059	239	1254	153	965	34	921	40	786	42	1438	37	1566	41	1667	37	526	28	278	27	819	151	178	100	272	107	477	306	150	139	217	205	275	134
YDR385W	0	0	0	0	0	0	0	0	0	0	0	0	0	0	0	0	0	0	0	0	0	0	0	0	0	0	0	0	0	0	0	0	0	0	0	0	0	0	0	0	0	0	0	0	0	0	0	0	0
YDR386W	54	47	41	52	21	25	89	215	73	213	115	251	14	0	16	0	13	0	101	466	27	316	26	292	8	18	5	68	4	35	8	101	7	59	9	87	47	66	46	92	39	110	68	18	38	35	40	39	31
YDR388W	0	0	0	0	0	0	0	0	0	0	0	0	0	0	0	0	0	0	0	0	0	0	0	0	0	0	0	0	0	0	0	0	0	0	0	0	0	0	0	0	0	0	0	0	0	0	0	0	0
YDR389W	210	122	132	198	74	110	125	202	124	200	124	283	91	287	135	120	76	253	83	175	47	108	30	49	35	198	21	342	22	248	27	333	34	199	24	320	176	203	172	254	134	457	263	107	149	146	178	197	217
YDR393W	482	347	263	614	169	372	51	140	54	123	60	171	432	1711	626	956	447	1044	110	412	19	353	23	358	67	381	37	489	46	397	63	746	37	411	34	828	233	294	179	334	194	557	698	281	392	476	412	480	200
YDR394W	42	35	25	75	23	39	26	33	14	26	24	38	6	0	9	0	5	0	0	27	5	50	4	17	9	55	4	81	1	37	11	126	3	57	1	110	13	13	31	20	21	55	84	34	42	47	46	64	28
YDR395W	0	0	0	0	0	0	0	0	0	0	0	0	0	0	0	0	0	0	0	0	0	0	0	0	0	0	0	0	0	0	0	0	0	0	0	0	0	0	0	0	0	0	0	0	0	0	0	0	0
YDR397C	202	175	143	291	82	173	221	496	164	482	269	614	163	688	248	424	156	483	114	704	84	513	52	570	39	177	26	245	32	259	57	680	34	343	17	661	148	181	120	230	147	339	330	149	181	298	197	275	121
YDR400W	236	268	163	381	89	231	116	223	114	202	121	276	111	430	144	235	109	251	154	858	66	774	34	592	40	335	25	282	27	285	43	471	32	263	16	457	136	134	93	147	103	207	378	177	210	282	260	312	80
YDR402C	144	115	101	186	51	112	109	214	84	199	118	288	11	0	21	0	25	0	51	275	38	200	27	234	17	248	10	248	20	219	27	261	20	166	8	292	49	57	67	75	62	132	164	67	93	117	117	131	41
YDR404C	212	155	132	231	67	120	158	364	160	331	171	452	270	1495	417	747	289	987	86	581	75	453	41	402	40	493	30	473	46	397	49	655	35	384	19	718	105	146	115	166	94	225	380	164	212	306	227	321	208
YDR405W	388	392	251	566	121	352	165	347	150	339	167	422	186	696	279	375	199	397	156	596	72	470	45	385	62	831	33	680	28	529	67	707	41	346	23	644	170	285	149	306	169	502	419	224	229	308	268	455	175
YDR407C	0	0	1	0	0	0	5	6	6	2	6	7	2	0	1	0	1	0	0	0	0	0	0	0	0	0	0	0	0	0	0	0	0	0	0	0	2	4	4	1	1	11	9	3	5	2	0	1	1
YDR409W	207	131	124	185	64	119	114	145	80	160	89	200	83	158	133	119	105	164	102	79	26	51	16	59	40	259	14	227	26	171	36	262	26	150	15	297	97	74	79	77	92	149	217	73	122	102	128	115	32
YDR411C	0	0	0	0	0	0	0	0	0	0	0	0	0	0	0	0	0	0	0	0	0	0	0	0	0	0	0	0	0	0	0	0	0	0	0	0	0	0	0	0	0	0	0	0	0	0	0	0	0
YDR412W	0	0	0	0	0	0	0	0	0	0	0	0	0	0	0	0	0	0	0	0	0	0	0	0	0	0	0	0	0	0	0	0	0	0	0	0	0	0	0	0	0	0	0	0	0	0	0	0	0
YDR414C	0	0	0	0	0	0	0	0	0	0	0	0	0	0	0	0	0	0	0	0	0	0	0	0	0	0	0	0	0	0	0	0	0	0	0	0	0	0	0	0	0	0	0	0	0	0	0	0	0
YDR416W	250	148	134	236	87	116	200	315	163	289	208	386	100	441	162	268	115	255	162	410	76	220	39	197	33	147	16	218	16	113	49	501	36	306	25	513	111	90	119	108	100	188	343	125	188	208	232	213	113
YDR418W	260	110	147	154	85	84	125	134	108	151	166	197	46	16	71	9	41	9	119	16	55	15	29	4	18	41	16	42	24	20	50	389	48	210	23	387	120	50	92	45	87	60	324	97	193	152	246	164	82
YDR421W	90	57	65	62	34	49	111	202	87	194	119	252	57	50	94	23	73	42	45	127	30	138	29	161	23	82	14	94	12	137	30	252	19	122	7	282	89	93	73	87	79	146	178	41	118	85	135	106	57
YDR422C	121	73	80	100	43	60	50	97	50	86	67	110	91	526	154	266	115	290	15	100	13	99	16	55	35	122	19	206	20	143	32	280	23	148	21	309	116	133	88	140	114	256	238	63	139	141	173	158	86
YDR423C	0	0	0	0	0	0	0	0	0	0	0	0	0	0	0	0	0	0	0	0	0	0	0	0	0	0	0	0	0	0	0	0	0	0	0	0	0	0	0	0	0	0	0	0	0	0	0	0	0
YDR425W	38	35	28	38	10	22	226	487	183	454	247	608	7	0	10	0	7	0	118	692	85	452	46	397	7	26	1	34	5	76	8	84	3	37	4	82	27	34	22	35	24	45	62	17	23	24	31	25	38
YDR427W	190	163	102	238	60	157	213	388	189	396	205	490	113	507	165	228	129	315	128	567	52	469	46	473	36	234	35	289	29	187	52	682	27	415	29	686	108	103	81	108	86	193	347	151	200	211	205	270	113
YDR428C	60	42	33	78	11	47	137	332	150	294	161	394	3	0	16	0	10	0	119	821	52	616	34	417	7	43	4	80	6	45	5	116	11	75	1	140	35	24	22	32	25	71	42	11	23	24	26	21	7
YDR430C	68	33	41	44	21	31	9	30	18	18	21	35	7	0	14	0	12	0	19	0	7	4	4	0	10	5	3	8	4	43	10	98	12	56	4	106	58	27	53	50	39	68	91	21	32	28	56	59	10
YDR432W	100	6	88	17	49	14	117	34	95	35	135	59	22	0	39	0	33	3	74	0	42	2	31	0	27	0	21	0	18	0	14	25	18	8	7	17	80	4	54	10	64	26	216	17	128	31	149	30	59
YDR434W	172	142	117	227	61	139	115	199	107	188	130	262	128	530	134	292	133	353	150	287	40	222	27	208	26	188	21	276	24	180	36	339	24	191	19	355	77	54	66	70	59	94	210	118	106	144	154	205	80
YDR435C	0	0	0	0	0	0	0	0	0	0	0	0	0	0	0	0	0	0	0	0	0	0	0	0	0	0	0	0	0	0	0	0	0	0	0	0	0	0	0	0	0	0	0	0	0	0	0	0	0
YDR436W	41	20	22	28	8	18	66	75	52	84	49	88	24	45	34	48	17	20	63	113	20	103	9	141	7	34	5	27	6	6	15	123	10	65	0	132	19	11	16	11	22	19	50	13	43	23	41	47	13
YDR437W	200	189	141	305	70	202	178	390	132	373	174	461	292	1803	446	792	350	998	173	958	76	649	45	645	53	491	32	320	34	359	37	556	38	304	19	643	128	197	123	192	91	297	367	208	216	322	235	374	74
YDR438W	0	0	0	0	0	0	0	0	0	0	0	0	0	0	0	0	0	0	0	0	0	0	0	0	0	0	0	0	0	0	0	0	0	0	0	0	0	0	0	0	0	0	0	0	0	0	0	0	0
YDR439W	0	0	0	0	0	0	0	0	0	0	0	0	0	0	0	0	0	0	0	0	0	0	0	0	0	0	0	0	0	0	0	0	0	0	0	0	0	0	0	0	0	0	0	0	0	0	0	0	0
YDR440W	0	0	0	0	0	0	0	0	0	0	0	0	0	0	0	0	0	0	0	0	0	0	0	0	0	0	0	0	0	0	0	0	0	0	0	0	0	0	0	0	0	0	0	0	0	0	0	0	0
YDR446W	254	182	162	261	67	156	155	319	142	305	185	412	115	666	179	294	122	354	129	1524	66	1386	53	1398	41	607	19	635	27	611	34	407	22	294	25	442	126	165	129	158	92	235	309	128	187	249	187	296	228
YDR448W	0	0	0	0	0	0	0	0	0	0	0	0	0	0	0	0	0	0	0	0	0	0	0	0	0	0	0	0	0	0	0	0	0	0	0	0	0	0	0	0	0	0	0	0	0	0	0	0	0
YDR449C	128	108	83	130	40	91	93	180	81	177	107	267	18	0	27	0	10	0	42	126	41	104	27	153	8	41	10	30	9	52	15	231	15	119	11	205	71	57	58	60	45	128	142	50	77	80	68	72	48
YDR450W	42	15	28	15	14	13	49	57	42	68	54	83	92	296	156	186	98	200	11	89	17	28	10	45	6	12	8	1	1	17	11	80	9	50	2	104	25	18	17	35	26	44	78	27	49	45	41	51	25
YDR451C	156	144	104	191	55	120	130	215	96	178	123	220	116	467	168	263	124	379	176	637	38	582	20	621	25	228	11	299	22	202	40	336	22	180	16	398	95	154	91	141	104	284	233	112	138	148	167	161	135
YDR452W	0	0	0	0	0	0	0	0	0	0	0	0	0	0	0	0	0	0	0	0	0	0	0	0	0	0	0	0	0	0	0	0	0	0	0	0	0	0	0	0	0	0	0	0	0	0	0	0	0
YDR456W	0	0	1	0	1	0	10	27	10	28	18	34	51	255	93	157	68	228	0	0	8	9	0	0	0	0	0	0	0	0	0	2	2	4	0	3	1	0	2	0	1	0	5	0	2	0	2	1	9
YDR459C	407	348	283	554	139	340	293	452	246	429	353	526	331	1291	465	638	279	752	222	1317	118	1063	82	787	88	827	62	780	66	598	91	1197	63	650	57	1128	252	280	229	346	219	539	671	295	361	489	463	581	376
YDR460W	208	193	140	273	53	183	134	311	125	291	164	391	204	1413	312	720	213	762	74	441	43	288	34	253	25	472	26	565	30	286	35	449	30	199	17	455	151	165	97	181	82	313	331	184	239	293	278	313	231
YDR461W	145	107	67	153	40	88	56	97	38	94	48	137	15	0	17	0	19	0	37	69	15	63	7	70	21	204	9	220	18	163	17	258	14	112	11	216	63	40	52	62	32	96	159	63	97	103	106	122	37
YDR463W	133	114	81	174	41	99	112	156	90	153	85	214	22	0	36	0	15	0	30	72	15	107	23	89	16	42	16	98	14	49	25	530	20	257	15	554	93	56	82	59	76	95	217	75	100	96	127	128	71
YDR465C	53	26	34	46	20	20	135	207	114	239	125	314	11	0	10	0	11	0	179	789	75	696	37	772	20	189	4	303	9	196	8	177	12	140	11	203	40	63	28	61	43	93	42	32	27	31	33	28	38
YDR468C	296	238	157	404	113	266	216	512	183	493	219	649	376	2509	574	1422	466	1626	190	688	70	623	49	590	28	340	23	366	16	296	37	642	36	339	29	612	130	212	130	220	123	353	398	186	206	297	237	336	143
YDR469W	0	0	0	0	0	0	0	0	0	0	0	0	0	0	0	0	0	0	0	0	0	0	0	0	0	0	0	0	0	0	0	0	0	0	0	0	0	0	0	0	0	0	0	0	0	0	0	0	0
YDR471W	189	149	109	205	55	149	131	150	133	202	124	278	134	713	202	314	102	448	82	398	35	290	22	233	20	166	12	148	15	58	30	412	31	172	20	407	103	120	98	134	91	204	204	100	118	134	149	188	81
YDR472W	39	32	19	42	15	33	78	131	75	148	120	299	3	0	3	0	2	0	126	478	32	219	22	326	3	78	0	46	0	21	3	54	5	21	2	51	10	4	11	2	4	4	14	7	7	14	19	19	19
YDR475C	0	0	0	0	0	0	0	0	0	0	0	0	0	0	0	0	0	0	0	0	0	0	0	0	0	0	0	0	0	0	0	0	0	0	0	0	0	0	0	0	0	0	0	0	0	0	0	0	0
YDR476C	350	337	229	616	106	379	60	85	52	123	44	142	103	785	167	297	126	394	66	207	18	189	14	178	50	479	31	733	49	518	89	1065	69	565	29	1055	177	338	179	337	143	515	648	320	366	566	436	602	362
YDR477W	27	11	19	11	3	14	117	260	111	233	126	314	6	0	7	0	4	0	58	348	43	127	27	110	4	16	3	13	6	25	5	82	10	71	6	106	10	11	14	6	21	9	39	7	24	24	16	19	18
YDR479C	102	104	61	149	43	89	39	56	41	51	48	66	71	367	112	207	82	199	30	67	16	31	11	15	17	173	15	118	13	114	26	276	16	134	8	240	59	110	44	116	55	149	110	69	79	89	77	94	86
YDR480W	194	153	124	216	72	132	57	122	47	133	67	175	188	744	296	556	234	621	34	47	12	80	14	128	35	193	26	324	33	235	33	584	36	348	26	659	125	172	100	197	90	206	406	218	241	325	318	389	141
YDR481C	40	41	33	49	19	43	84	240	77	227	99	295	103	488	167	249	127	280	128	373	31	330	21	233	7	11	6	41	7	9	12	94	11	64	10	119	34	30	34	51	29	71	77	42	45	38	60	70	76
YDR482C	343	224	188	298	104	203	248	386	193	384	244	559	400	1577	474	771	353	863	261	787	80	698	50	695	57	448	36	368	35	233	82	967	41	452	36	945	193	253	188	259	160	460	562	302	315	406	390	476	211
YDR484W	37	43	37	62	21	40	76	157	75	154	79	188	14	0	23	0	9	0	27	57	21	67	19	43	15	145	11	149	14	98	11	150	8	72	6	139	41	17	31	18	32	43	68	10	36	36	38	25	18
YDR485C_1	270	167	160	251	75	149	184	273	189	354	180	395	178	842	347	384	175	471	58	216	55	212	41	132	46	411	35	553	42	418	49	643	36	321	38	579	129	111	109	118	102	186	320	117	194	186	232	252	171
YDR485C_2	150	79	82	101	49	74	55	115	58	112	92	182	50	68	72	47	48	32	112	134	19	63	19	91	22	249	19	425	15	206	23	305	13	122	18	299	115	115	102	141	77	235	252	58	134	88	144	117	47
YDR487C	42	21	11	39	9	18	57	117	72	148	69	210	197	1914	337	1138	157	1067	133	401	24	229	19	325	6	61	0	32	2	45	8	93	8	36	5	153	27	16	11	19	7	44	40	10	18	12	26	25	13
YDR489W	283	207	148	354	87	217	251	424	210	442	248	530	189	700	272	359	185	476	123	739	95	504	56	504	55	565	24	673	36	552	39	518	29	302	14	530	144	199	109	176	111	326	255	118	174	203	176	247	174
YDR493W	0	0	0	0	0	0	0	0	0	0	0	0	0	0	0	0	0	0	0	0	0	0	0	0	0	0	0	0	0	0	0	0	0	0	0	0	0	0	0	0	0	0	0	0	0	0	0	0	0
YDR495C	59	25	38	34	24	9	56	39	49	46	51	57	43	59	60	95	35	66	49	30	6	17	9	7	7	9	4	12	8	10	8	58	8	33	4	74	52	13	34	21	32	17	112	10	52	18	66	35	29
YDR496C	79	60	47	82	37	42	84	142	72	134	99	187	5	0	21	0	8	0	132	78	20	92	13	78	13	40	13	81	12	17	16	192	11	99	8	153	42	24	35	30	26	38	65	18	54	22	38	33	58
YDR497C	0	0	0	0	0	0	0	0	0	0	0	0	0	0	0	0	0	0	0	0	0	0	0	0	0	0	0	0	0	0	0	0	0	0	0	0	0	0	0	0	0	0	0	0	0	0	0	0	0
YDR498C	172	145	113	208	65	143	165	284	139	323	181	398	380	1867	600	947	345	1213	177	676	42	475	25	579	30	693	21	512	22	573	25	391	23	210	17	500	99	97	101	139	78	187	290	126	131	165	189	226	112
YDR499W	95	38	60	44	20	33	82	183	88	174	119	226	14	0	20	0	12	0	41	104	27	105	18	139	16	279	15	350	14	304	15	171	8	81	15	172	67	74	52	71	71	109	146	36	70	47	91	95	62
YDR500C	77	30	43	75	21	39	236	358	168	344	232	488	5	0	17	0	9	0	160	518	88	337	53	233	9	14	9	15	4	14	5	37	3	17	7	46	32	44	37	47	26	75	34	10	25	14	21	12	23
YDR501W	65	45	36	85	22	48	39	73	34	45	42	85	8	0	15	0	6	0	31	61	11	43	9	19	7	33	7	40	5	26	4	104	9	33	8	119	71	71	51	100	41	174	103	23	46	25	65	38	7
YDR502C	155	117	92	177	51	106	58	141	67	117	77	195	25	5	38	0	14	5	30	93	29	120	14	146	12	137	22	122	14	129	23	381	14	218	12	391	94	168	93	145	50	250	238	116	146	170	161	205	149
YDR503C	141	158	86	282	65	150	54	66	70	61	56	87	16	0	23	0	21	0	34	44	15	35	6	45	21	135	10	190	10	83	19	326	16	188	16	330	68	103	67	108	54	189	160	60	97	64	122	134	35
YDR506C	208	164	133	220	69	138	116	174	94	187	130	256	280	907	472	405	275	376	122	175	33	144	14	176	37	441	16	452	28	488	41	464	26	261	22	553	169	266	159	276	148	513	361	130	174	168	264	247	67
YDR508C	2	0	4	0	0	0	67	113	58	109	53	178	0	0	1	0	2	0	21	54	17	73	15	111	2	15	1	7	1	1	0	0	0	0	0	0	4	0	3	0	4	0	12	1	5	5	2	12	1
YDR510W	205	135	112	267	51	144	113	221	115	212	137	257	157	559	239	312	153	280	66	460	40	420	31	342	39	317	18	353	19	263	38	421	33	210	17	448	102	168	126	199	86	309	224	116	122	188	141	236	112
YDR512C	280	273	163	372	86	228	192	295	163	275	177	383	225	1505	327	593	231	929	172	548	52	453	49	543	34	305	29	353	27	229	48	742	45	372	19	659	144	249	131	261	132	413	339	157	214	260	244	296	127
YDR513W	234	225	134	348	69	187	198	317	155	347	192	465	187	1170	368	472	197	686	135	752	71	543	41	606	25	257	17	201	19	227	37	612	21	300	16	566	179	300	168	303	153	527	281	130	145	266	201	285	112
YDR514C	211	169	129	314	69	133	172	386	150	341	188	499	238	1050	336	567	246	638	54	302	47	241	34	283	32	277	25	277	25	180	36	407	28	224	14	416	110	144	94	185	79	224	223	103	124	172	141	197	111
YDR515W	181	189	146	259	71	171	182	364	151	369	171	492	244	1118	399	569	251	433	132	276	65	211	40	263	33	622	30	775	34	523	35	675	30	272	21	635	135	258	140	263	156	387	378	164	210	250	248	252	181
YDR516C	223	187	152	253	74	175	131	227	83	222	116	290	150	787	251	404	178	532	164	369	50	333	37	385	40	200	26	249	24	158	40	473	36	284	20	426	148	136	105	180	125	287	327	168	185	240	250	265	100
YDR517W	238	166	174	318	91	186	221	503	197	521	247	687	255	1350	400	648	269	631	89	716	84	622	48	538	61	487	24	474	36	614	55	636	43	348	26	571	183	240	165	290	138	393	464	243	254	347	253	381	166
YDR518W	157	132	114	166	40	92	69	111	53	76	55	124	119	568	237	219	162	242	62	147	31	88	12	100	34	194	18	319	27	226	33	356	28	175	17	289	130	171	85	193	81	288	281	88	162	152	214	187	133
YDR519W	229	179	135	265	71	211	124	261	106	256	146	331	223	1438	355	665	274	975	149	527	53	496	45	403	38	207	21	312	15	140	38	630	48	307	15	560	121	149	107	126	103	222	332	203	176	336	233	355	148
YDR520C	64	37	29	48	24	33	56	37	53	30	57	43	77	435	73	163	84	167	38	79	15	90	7	54	7	10	8	9	9	13	2	23	3	18	3	21	24	49	32	27	33	66	73	19	48	26	68	39	13
YDR522C	228	166	135	262	67	142	162	318	130	267	153	369	100	515	128	204	125	289	157	629	55	541	48	379	22	267	22	261	13	201	45	521	30	283	17	511	118	185	93	150	119	287	301	137	190	203	182	263	91
YDR523C	55	52	35	84	25	55	185	504	210	464	247	626	7	0	16	0	16	0	157	893	67	849	52	601	18	480	10	531	17	374	8	185	14	87	9	172	51	57	48	49	36	85	69	14	28	23	38	22	68
YDR525W-A	0	0	0	0	0	0	0	0	0	0	0	0	0	0	0	0	0	0	0	0	0	0	0	0	0	0	0	0	0	0	0	0	0	0	0	0	0	0	0	0	0	0	0	0	0	0	0	0	0
YDR527W	234	158	128	261	74	145	149	247	126	249	143	393	175	611	295	384	177	433	123	445	49	363	26	475	33	290	26	456	34	407	38	508	24	268	22	568	178	234	124	282	117	477	313	134	187	168	234	231	132
YDR528W	58	15	35	34	17	17	191	304	181	364	204	442	8	3	21	0	20	0	97	110	64	87	53	102	24	452	14	423	9	407	11	78	10	56	9	74	67	85	68	95	49	123	83	32	55	40	53	52	28
YDR530C	194	88	107	144	48	90	97	143	77	159	100	228	113	334	122	148	97	203	40	174	36	176	27	217	38	329	17	352	38	294	36	514	24	235	28	492	148	161	91	196	105	281	347	194	186	240	234	293	175
YDR531W	286	252	157	447	78	288	184	470	162	417	200	555	329	2222	490	1037	360	1232	173	503	75	381	42	560	41	503	40	614	22	419	38	547	41	297	20	566	140	189	120	223	118	335	342	227	207	299	218	350	118
YDR532C	258	211	126	339	81	183	187	349	154	377	180	459	174	667	271	438	189	374	136	595	50	545	34	608	26	447	23	430	29	316	50	594	40	274	20	600	141	172	99	185	98	352	323	163	170	313	242	329	121
YDR533C	280	290	169	438	90	248	167	324	144	318	183	464	49	107	65	46	51	34	196	992	68	969	41	768	46	452	28	653	30	524	42	614	30	339	18	550	156	290	140	275	152	475	393	199	204	304	287	342	136
YDR534C	9	0	7	1	2	6	44	72	41	91	55	92	1	0	1	0	0	0	35	68	15	62	10	12	4	0	1	0	0	0	4	44	4	23	4	33	8	0	4	0	4	0	13	1	8	5	7	4	38
YDR536W	114	112	63	124	42	96	96	165	93	161	98	252	20	0	19	0	17	0	55	401	37	365	13	421	26	290	14	303	11	217	31	354	28	156	15	378	83	56	79	61	52	116	196	64	81	105	118	102	73
YDR538W	321	304	195	435	125	255	165	349	138	396	205	566	510	3544	781	1682	518	1986	218	753	67	496	32	525	65	464	22	589	35	525	38	634	47	303	21	613	168	246	153	246	128	475	446	197	231	329	279	394	165
YDR539W	373	373	240	513	123	330	109	237	124	256	141	302	91	302	113	102	123	153	139	294	46	237	16	303	45	402	33	455	35	389	52	654	42	323	29	625	130	144	99	141	115	254	461	161	239	303	265	378	212
YDR541C	382	375	209	547	138	370	165	335	152	328	186	393	155	621	270	364	188	482	120	813	76	662	38	583	57	540	31	654	33	550	59	808	45	417	37	830	174	256	140	246	169	422	617	305	343	540	410	571	177
YEL001C	202	148	100	232	73	147	101	196	115	205	101	266	57	273	118	120	71	196	109	115	30	66	18	56	28	431	11	375	13	278	35	356	19	182	12	424	110	122	69	135	82	248	211	99	121	120	129	154	72
YEL003W	222	216	110	335	71	199	136	266	117	288	142	443	75	269	137	149	68	201	75	887	69	788	28	748	27	167	13	191	21	188	18	379	20	183	20	344	75	106	103	133	73	198	232	143	176	221	169	234	133
YEL004W	165	141	90	266	49	130	108	193	100	193	113	274	266	1472	410	676	335	874	76	599	44	463	35	431	31	274	20	434	16	235	29	357	17	164	10	291	147	180	83	180	75	360	203	80	129	151	178	180	88
YEL006W	272	268	168	396	96	261	153	237	136	285	176	318	198	1243	292	566	225	633	82	473	57	344	30	284	41	366	28	379	28	264	49	596	40	291	18	674	120	167	85	157	113	221	384	191	206	329	250	320	89
YEL009C	185	150	137	272	63	158	177	394	146	372	183	494	22	0	52	1	26	2	79	389	60	260	32	277	28	252	18	202	17	167	30	451	25	239	19	478	90	129	95	126	67	169	232	123	145	186	171	215	108
YEL011W	97	82	62	135	34	55	21	53	36	41	30	66	20	37	18	16	17	10	0	31	14	52	5	31	19	139	9	179	11	103	13	140	11	91	6	133	62	54	42	53	44	105	146	34	71	55	82	65	34
YEL012W	103	121	69	140	26	94	68	166	65	157	83	189	15	1	25	0	21	0	90	176	43	108	11	157	22	212	17	174	22	170	22	325	10	158	7	301	69	113	60	131	58	185	142	42	68	91	95	105	68
YEL013W	0	0	0	0	0	0	0	0	0	0	0	0	0	0	0	0	0	0	0	0	0	0	0	0	0	0	0	0	0	0	0	0	0	0	0	0	0	0	0	0	0	0	0	0	0	0	0	0	0
YEL016C	118	113	89	165	36	99	78	113	65	113	74	154	88	665	130	240	80	370	84	147	30	222	13	108	19	199	13	244	15	104	43	448	17	246	20	448	72	115	84	121	72	191	262	151	127	183	150	251	54
YEL017W	0	0	0	0	0	0	0	0	0	0	0	0	0	0	0	0	0	0	0	0	0	0	0	0	0	0	0	0	0	0	0	0	0	0	0	0	0	0	0	0	0	0	0	0	0	0	0	0	0
YEL018W	141	136	106	212	47	144	116	187	69	188	96	245	56	188	79	94	56	125	91	305	30	254	22	175	19	192	16	287	15	182	28	326	23	170	17	335	105	195	87	176	81	295	234	138	131	189	138	218	82
YEL019C	291	360	190	480	122	301	198	371	186	396	219	526	217	1139	337	587	230	708	139	898	70	557	44	494	43	438	30	406	28	431	44	604	32	320	18	555	170	258	147	260	166	451	379	186	249	293	235	345	173
YEL023C	317	174	215	267	109	140	288	675	274	707	335	868	330	729	467	415	340	428	193	839	107	560	66	521	83	818	49	890	62	813	83	910	59	468	37	907	294	383	241	396	246	700	741	216	401	397	459	426	255
YEL026W	97	67	76	121	37	68	85	137	79	142	86	213	54	232	74	121	61	174	35	258	34	249	19	239	16	151	15	132	15	62	19	277	23	130	11	341	69	47	51	52	43	122	210	89	107	119	128	166	31
YEL027W	43	15	19	10	15	9	61	61	55	58	74	79	19	13	28	4	22	8	37	7	24	0	5	13	2	17	2	6	3	4	3	25	2	11	0	18	19	1	16	2	9	3	41	6	14	7	41	10	22
YEL029C	235	221	134	322	86	184	183	385	151	402	181	479	241	1486	415	788	264	971	85	587	72	556	45	630	38	330	15	370	23	315	50	583	39	334	37	674	111	159	118	157	117	280	348	132	168	253	220	297	161
YEL031W	0	0	0	0	0	0	0	0	0	0	0	0	0	0	0	0	0	0	0	0	0	0	0	0	0	0	0	0	0	0	0	0	0	0	0	0	0	0	0	0	0	0	0	0	0	0	0	0	0
YEL032W	23	16	15	27	5	18	9	12	8	12	2	14	4	0	6	0	1	0	17	0	3	10	2	17	3	14	4	25	4	23	9	61	4	43	5	53	14	0	6	0	5	0	59	20	27	28	53	32	26
YEL034W	179	24	103	37	62	18	158	138	146	126	187	232	29	12	41	0	36	1	137	8	52	5	39	2	15	4	17	8	22	0	25	32	13	33	11	68	99	5	98	8	81	14	358	27	197	20	226	40	81
YEL035C	242	32	176	77	85	38	37	27	30	31	46	32	72	16	95	17	77	17	0	1	12	7	8	0	30	16	20	8	33	11	46	107	37	60	24	136	177	36	120	36	151	72	666	37	398	73	432	78	111
YEL036C	0	0	0	0	0	0	0	0	0	0	0	0	0	0	0	0	0	0	0	0	0	0	0	0	0	0	0	0	0	0	0	0	0	0	0	0	0	0	0	0	0	0	0	0	0	0	0	0	0
YEL037C	63	52	40	60	9	37	35	26	24	40	39	44	4	0	13	0	8	0	18	49	11	0	12	9	7	41	5	54	7	47	5	57	4	29	4	54	32	10	24	15	28	35	100	20	43	48	58	61	11
YEL039C	228	142	103	239	73	122	129	231	108	255	143	269	184	1294	286	444	181	781	104	1125	43	864	31	1155	27	386	13	402	17	315	36	615	28	286	34	499	82	136	72	147	98	246	218	115	175	190	174	221	78
YEL040W	200	151	143	268	60	118	128	335	115	302	133	342	172	603	251	216	187	260	118	138	32	154	8	105	48	213	19	258	23	207	26	410	19	207	10	421	106	101	87	120	87	221	527	222	275	345	355	341	147
YEL041W	44	26	37	43	28	26	39	80	34	66	45	80	9	0	18	0	13	0	0	86	10	55	7	54	13	110	15	82	9	79	14	182	14	106	6	173	46	125	64	125	58	229	141	52	91	74	99	99	17
YEL044W	0	0	0	0	0	0	0	0	0	0	0	0	0	0	0	0	0	0	0	0	0	0	0	0	0	0	0	0	0	0	0	0	0	0	0	0	0	0	0	0	0	0	0	0	0	0	0	0	0
YEL046C	192	249	107	373	50	242	67	139	61	115	71	175	13	0	23	0	13	0	58	47	17	67	10	74	21	180	7	126	19	79	11	273	11	132	6	247	53	79	55	81	56	147	157	83	101	119	119	141	67
YEL048C	87	61	65	71	31	28	118	238	105	250	92	369	20	0	40	0	26	0	66	427	42	284	26	182	35	268	21	279	29	218	36	431	23	212	21	418	92	171	95	131	83	248	276	131	133	221	166	243	168
YEL049W	15	17	14	25	0	12	7	13	4	14	7	17	1	0	0	0	1	0	0	35	3	58	0	6	0	0	0	0	0	3	2	45	2	28	2	34	14	48	17	73	15	93	5	12	6	13	8	11	6
YEL050C	82	64	63	127	34	72	35	90	35	74	42	88	11	0	12	0	16	0	53	320	19	194	9	96	21	90	8	145	15	194	15	141	8	77	12	145	71	136	64	127	61	234	108	54	82	72	98	99	39
YEL051W	95	87	73	143	51	83	105	207	91	206	91	290	42	276	96	148	56	231	121	414	46	426	22	544	25	236	13	126	14	196	28	364	26	227	18	369	70	61	53	63	61	87	186	94	98	142	148	145	71
YEL052W	84	71	50	120	23	62	103	247	97	240	136	293	17	0	21	0	6	0	52	292	27	290	25	254	23	227	9	338	14	206	18	237	21	135	8	269	67	114	38	118	44	158	107	66	44	94	75	104	55
YEL053C	1	0	0	0	0	0	13	15	6	18	10	24	0	0	1	0	0	0	0	26	2	7	2	7	0	0	0	0	1	0	0	0	0	0	0	0	3	0	1	0	1	0	10	2	8	7	12	12	0
YEL055C	0	0	0	0	0	0	0	0	0	0	0	0	0	0	0	0	0	0	0	0	0	0	0	0	0	0	0	0	0	0	0	0	0	0	0	0	0	0	0	0	0	0	0	0	0	0	0	0	0
YEL056W	240	201	160	305	75	166	169	303	147	251	203	392	126	656	203	318	147	360	128	458	67	460	46	341	35	306	33	362	29	231	43	541	32	301	27	535	131	190	105	246	110	302	336	164	183	252	246	300	168
YEL057C	162	109	91	144	58	112	71	117	52	135	82	184	199	1073	341	489	192	539	17	103	12	65	10	34	29	350	14	464	12	390	30	314	22	164	19	414	77	42	67	106	33	175	224	102	97	116	163	212	67
YEL058W	106	100	52	140	44	81	148	307	120	296	151	366	237	1604	403	768	310	875	61	207	58	168	31	131	27	171	19	230	11	166	19	196	23	136	17	256	84	66	46	71	77	126	224	92	131	151	137	168	51
YEL059C-A	187	245	131	358	71	222	131	282	106	307	126	420	30	0	46	7	35	0	220	1149	63	1263	42	882	51	793	32	872	27	836	38	666	30	339	21	669	123	218	114	210	76	326	295	175	182	249	215	314	156
YEL060C	240	181	150	282	81	150	115	117	109	156	140	178	73	265	119	206	73	190	67	311	31	244	19	252	41	437	27	484	30	258	27	267	21	183	16	251	121	125	89	153	121	272	274	95	165	145	217	182	67
YEL061C	131	22	81	48	44	27	67	78	55	83	102	87	15	0	26	0	12	0	47	62	14	46	19	15	13	33	20	46	18	13	22	67	13	39	11	59	72	24	59	25	53	28	130	19	97	28	93	30	60
YEL062W	187	191	126	218	68	148	140	241	113	219	146	313	18	0	41	0	17	0	100	176	44	96	28	190	10	246	10	357	17	261	35	322	18	173	14	329	101	111	65	101	72	212	263	95	126	132	178	165	111
YEL063C	163	108	102	183	45	114	108	143	75	129	96	167	80	417	139	226	103	237	133	429	50	578	22	308	30	333	15	438	22	288	32	432	32	198	16	370	115	254	125	281	97	476	303	109	177	211	213	198	137
YEL064C	26	3	20	1	7	0	42	74	42	73	38	102	14	0	21	0	11	0	30	42	22	33	9	6	11	80	9	48	4	76	10	98	6	55	5	81	30	46	40	68	48	94	96	16	53	48	62	55	9
YEL065W	0	0	0	0	0	0	0	0	0	0	0	0	0	0	0	0	0	0	0	0	0	0	0	0	0	0	0	0	0	0	0	0	0	0	0	0	0	0	0	0	0	0	0	0	0	0	0	0	0
YEL066W	168	172	111	272	65	162	82	213	100	194	103	283	180	1465	284	675	197	887	92	351	38	238	27	221	23	255	15	313	12	225	28	520	20	263	15	507	80	89	63	97	71	154	258	153	166	226	204	285	93
YEL072W	80	57	56	68	29	53	95	225	105	202	112	274	211	1232	273	579	218	798	104	858	41	709	27	550	18	175	13	223	8	150	23	387	30	166	7	280	81	159	59	121	49	258	130	81	76	108	94	131	51
YER001W	96	38	60	50	28	29	132	248	104	207	129	267	160	825	229	514	201	603	134	481	53	440	24	438	26	268	13	207	23	197	28	228	13	139	17	220	83	78	80	60	69	113	205	78	110	94	142	146	88
YER006W	77	41	30	76	17	53	18	41	18	43	23	62	4	0	10	0	9	0	8	40	10	22	5	18	7	44	3	53	8	53	5	108	4	69	6	139	44	63	29	51	21	69	136	68	84	104	96	117	47
YER007C-A	87	26	47	31	28	16	235	146	186	160	224	206	5	0	20	0	23	0	188	103	77	85	44	119	21	38	17	138	12	80	17	124	14	78	8	137	72	66	49	78	61	104	115	23	67	37	62	34	38
YER009W	111	44	65	66	36	47	86	137	90	122	112	251	83	415	138	208	62	218	33	75	23	76	15	84	10	28	4	35	8	23	17	157	10	65	12	300	85	69	65	89	40	194	162	61	60	53	103	90	27
YER010C	296	256	174	379	90	216	211	470	183	475	223	599	210	1088	280	488	225	567	166	1518	76	1184	57	1245	59	1146	41	1120	38	1065	63	769	30	407	28	737	183	342	127	365	137	538	451	259	271	408	259	421	238
YER011W	173	105	79	133	39	95	89	174	86	209	99	320	238	3387	433	1483	263	1825	102	1743	32	1361	26	1768	39	1095	22	1111	31	802	38	616	38	315	29	867	123	249	98	286	95	517	257	122	109	163	195	241	64
YER012W	227	178	153	221	68	148	144	251	122	241	180	341	124	791	244	340	155	402	126	965	47	923	40	831	20	156	16	353	21	182	40	650	41	326	27	708	121	176	95	207	120	333	310	191	164	198	241	307	69
YER013W	356	231	214	326	122	199	138	185	103	187	127	241	278	1323	426	650	239	726	45	144	38	129	31	64	32	142	21	111	27	137	49	310	31	148	24	341	146	124	141	130	128	203	339	89	210	155	245	173	96
YER014C-A	222	169	150	277	72	172	132	232	107	232	146	347	91	263	131	137	86	190	87	390	48	369	32	344	49	305	25	430	30	154	34	478	32	231	22	408	159	231	139	253	125	422	420	228	242	306	264	350	124
YER016W_1	30	23	25	34	16	24	59	122	59	133	53	193	3	0	8	0	6	0	69	104	33	102	18	130	6	28	3	39	3	42	6	85	1	56	2	98	15	6	16	4	15	4	70	27	33	50	42	70	11
YER017C	0	0	0	0	0	0	0	0	0	0	0	0	0	0	0	0	0	0	0	0	0	0	0	0	0	0	0	0	0	0	0	0	0	0	0	0	0	0	0	0	0	0	0	0	0	0	0	0	0
YER018C	280	225	187	355	97	192	172	382	162	362	211	529	131	546	220	205	122	348	102	840	82	757	57	595	32	170	27	239	32	93	43	676	31	348	26	580	139	163	119	198	125	245	441	250	242	376	274	373	151
YER019C-A	0	0	0	0	2	0	7	23	12	18	8	23	0	0	0	0	1	0	17	16	3	42	5	13	1	0	0	0	0	0	0	0	1	0	0	0	0	0	0	0	1	0	3	2	1	0	0	2	1
YER019W	73	51	59	73	15	53	19	22	27	20	20	35	211	758	282	341	210	368	0	51	17	70	12	59	17	119	10	128	11	111	18	176	10	107	10	190	62	62	56	56	52	84	213	122	115	154	130	145	35
YER020W	248	165	149	255	74	137	196	435	153	371	196	555	211	1606	332	718	247	822	110	732	75	470	53	765	52	276	27	412	37	285	40	616	25	301	19	516	154	273	156	288	139	563	422	184	228	276	252	369	151
YER021W	156	100	119	192	62	103	92	159	106	180	106	209	133	531	211	282	160	317	37	114	35	43	22	19	28	233	16	187	15	203	39	509	34	292	26	482	110	111	100	137	101	226	368	150	195	239	246	266	90
YER022W	4	11	7	14	1	9	21	56	18	58	23	85	0	0	5	0	0	0	0	76	8	31	5	86	3	1	2	3	1	9	1	41	1	9	4	22	3	10	5	7	8	12	23	7	8	12	15	12	0
YER023W	104	60	55	104	39	63	44	60	37	57	53	74	116	506	171	267	133	240	10	109	12	103	7	69	18	264	13	264	12	294	21	288	20	129	7	300	66	127	57	133	67	210	159	83	89	93	96	118	24
YER024W	269	232	184	349	95	202	126	168	100	136	127	240	62	133	118	48	80	59	28	110	35	102	28	143	35	95	20	106	33	113	34	475	34	345	18	629	134	150	126	125	122	201	476	141	225	258	303	296	72
YER025W	399	210	249	334	132	189	288	330	210	321	301	431	212	275	327	190	222	185	182	217	99	306	62	227	86	248	53	198	58	204	57	446	41	221	27	453	219	94	194	93	197	142	608	135	395	244	424	238	248
YER026C	215	207	131	304	66	194	122	168	152	184	148	266	34	16	77	10	30	7	148	289	39	155	28	231	27	122	17	74	17	144	33	370	23	181	19	355	110	38	97	45	92	57	299	106	154	160	209	246	139
YER027C	0	0	0	0	0	0	0	0	0	0	0	0	0	0	0	0	0	0	0	0	0	0	0	0	0	0	0	0	0	0	0	0	0	0	0	0	0	0	0	0	0	0	0	0	0	0	0	0	0
YER028C	602	577	347	867	240	498	399	830	375	833	490	1099	280	683	392	360	255	461	297	2357	181	1886	110	1698	129	2912	68	3450	87	2448	121	1452	73	687	59	1294	361	483	313	495	275	929	923	397	582	681	651	675	323
YER030W	0	0	0	0	0	0	0	0	0	0	0	0	0	0	0	0	0	0	0	0	0	0	0	0	0	0	0	0	0	0	0	0	0	0	0	0	0	0	0	0	0	0	0	0	0	0	0	0	0
YER032W	37	7	23	15	17	4	98	147	84	144	90	176	42	406	85	224	49	313	118	648	32	363	19	441	12	72	3	76	7	37	16	99	12	61	8	107	28	32	25	68	36	68	53	9	31	30	34	25	22
YER034W	66	40	47	59	22	27	83	143	65	136	82	193	15	0	13	0	13	0	98	225	33	208	17	270	7	111	10	123	9	109	20	277	10	150	9	294	45	62	40	71	42	89	145	70	92	114	92	99	30
YER035W	24	23	15	28	5	8	14	33	9	31	17	41	10	14	39	8	19	3	9	1	5	33	4	7	5	20	3	13	3	35	14	196	6	105	10	217	15	20	8	22	14	34	67	45	41	78	48	81	11
YER036C	213	169	149	274	89	163	139	238	104	256	145	397	140	663	289	291	193	400	28	383	56	174	28	249	43	177	29	307	34	209	37	387	42	217	33	405	150	181	113	182	113	340	299	135	177	193	210	234	121
YER037W	14	8	10	8	10	6	18	22	24	24	20	50	3	0	5	0	2	0	49	54	6	35	4	26	3	48	3	13	2	33	2	21	3	8	4	11	9	4	6	2	6	9	32	8	6	6	17	13	5
YER038C	3	3	1	6	2	5	17	31	11	38	15	26	24	124	21	43	10	59	36	65	8	21	3	24	0	0	2	0	0	0	0	0	0	0	0	0	2	0	0	0	1	0	0	0	0	0	3	1	1
YER039C-A	35	34	32	74	21	46	68	66	46	70	66	103	107	737	195	368	118	424	76	352	36	208	22	362	3	22	3	40	7	13	5	45	6	26	4	69	32	41	29	57	34	76	55	29	25	33	40	41	14
YER040W	0	0	0	0	0	0	0	0	0	0	0	0	0	0	0	0	0	0	0	0	0	0	0	0	0	0	0	0	0	0	0	0	0	0	0	0	0	0	0	0	0	0	0	0	0	0	0	0	0
YER041W	14	10	6	25	8	13	6	5	3	8	1	6	0	0	2	0	0	0	5	0	1	20	0	5	1	11	1	7	0	5	0	10	0	5	0	6	1	3	2	8	4	10	12	0	4	3	7	9	2
YER042W	184	146	107	214	60	145	123	183	73	210	121	255	29	0	34	0	31	0	120	172	39	124	19	119	16	133	13	160	15	108	29	340	16	169	13	332	112	156	74	159	79	227	283	99	128	170	188	227	120
YER043C	19	24	10	33	5	17	227	281	166	276	213	334	4	0	7	0	2	0	118	92	79	46	42	44	4	18	2	29	2	14	1	4	0	1	1	4	24	30	12	26	10	45	11	2	14	6	10	7	4
YER044C	9	11	4	6	3	7	144	264	111	239	144	368	1	0	3	0	1	0	111	618	60	317	41	297	1	0	1	0	1	0	1	21	1	5	0	9	6	0	5	0	3	0	4	4	8	4	5	10	3
YER045C	0	0	0	0	0	0	0	0	0	0	0	0	0	0	0	0	0	0	0	0	0	0	0	0	0	0	0	0	0	0	0	0	0	0	0	0	0	0	0	0	0	0	0	0	0	0	0	0	0
YER046W	129	88	67	131	33	95	163	294	127	292	145	382	11	0	21	0	12	0	86	340	61	379	37	292	25	282	8	290	13	328	19	264	18	133	13	215	53	132	51	149	53	205	87	35	51	54	48	61	31
YER048C	37	18	23	37	15	19	73	90	73	82	80	113	4	0	4	1	5	0	27	330	34	252	18	212	5	50	2	81	5	50	8	80	4	53	4	110	30	24	23	33	29	67	22	6	10	12	13	16	75
YER048W-A	128	107	75	179	42	93	179	391	162	361	181	456	194	874	266	406	202	534	135	368	50	389	38	461	13	230	15	229	18	151	26	365	28	191	13	352	86	201	81	210	61	280	167	71	81	131	79	172	47
YER050C	311	359	179	591	99	349	218	372	179	385	219	573	217	892	270	503	199	619	191	1289	84	1099	46	1035	37	435	23	514	31	488	46	568	33	297	21	604	148	167	126	180	124	332	306	152	213	253	223	294	113
YER051W	176	133	130	224	59	120	166	283	138	314	154	383	66	355	96	163	74	221	192	956	66	863	38	648	32	245	23	216	14	196	31	339	15	189	13	386	95	116	77	116	70	169	201	80	145	135	167	127	105
YER052C	0	0	0	0	0	0	0	0	0	0	0	0	0	0	0	0	0	0	0	0	0	0	0	0	0	0	0	0	0	0	0	0	0	0	0	0	0	0	0	0	0	0	0	0	0	0	0	0	0
YER053C	92	60	45	93	21	46	51	60	47	54	61	100	139	528	218	248	130	359	0	61	20	29	7	14	11	95	9	135	10	41	12	124	7	91	8	137	33	20	31	14	25	41	99	32	51	46	63	39	50
YER054C	267	166	128	301	94	142	73	103	78	106	94	161	211	1060	357	482	184	584	140	851	21	380	15	675	22	364	9	322	17	393	17	374	17	163	14	376	125	88	73	142	62	223	227	78	130	101	146	118	26
YER055C	211	208	120	332	57	165	15	25	22	38	24	50	200	903	322	405	167	527	8	52	7	57	9	17	40	374	20	399	24	354	50	639	38	342	19	626	86	133	76	109	91	179	252	95	131	181	156	194	190
YER056C-A	271	201	187	318	96	211	199	347	177	357	228	433	86	64	115	69	84	60	81	68	73	19	49	79	47	47	27	80	35	34	52	607	34	310	33	546	190	164	124	183	151	350	427	192	247	288	280	335	136
YER057C	339	121	239	184	98	115	188	221	167	257	201	361	49	40	49	26	51	32	148	453	64	384	37	375	44	317	24	354	29	320	60	393	45	201	30	385	165	85	141	72	132	164	343	94	199	193	245	194	209
YER058W	327	316	215	532	129	329	227	478	197	511	231	641	131	705	190	508	136	493	188	1551	70	1014	60	1051	56	454	43	547	50	505	85	1130	56	597	47	1115	188	188	161	206	171	369	537	320	266	441	370	508	226
YER059W	26	31	26	56	12	32	12	38	9	30	14	48	4	0	6	0	7	0	7	26	7	10	1	34	6	196	1	228	1	140	15	95	5	49	5	74	24	32	24	35	19	56	55	11	22	26	40	29	62
YER060W	138	91	107	140	56	109	108	154	89	171	107	221	107	379	176	168	115	254	109	187	34	114	23	139	40	472	15	501	31	411	30	374	24	189	7	292	144	175	106	168	107	320	288	126	167	175	190	210	127
YER060W-A	0	0	0	0	0	0	0	0	0	0	0	0	0	0	0	0	0	0	0	0	0	0	0	0	0	0	0	0	0	0	0	0	0	0	0	0	0	0	0	0	0	0	0	0	0	0	0	0	0
YER062C	696	134	466	229	249	161	303	812	258	736	299	1013	1160	72554	1817	34115	1270	44351	445	34723	147	35070	80	33590	472	312395	194	309262	232	253547	189	3404	139	1480	97	2761	557	524	447	527	448	1013	1060	493	600	804	725	948	723
YER063W	168	143	118	232	68	148	108	139	73	129	75	172	69	269	109	128	70	105	65	406	30	209	24	187	21	180	29	133	15	183	47	424	28	226	13	404	133	220	113	212	105	401	322	140	209	211	197	245	166
YER065C	257	243	153	347	78	207	138	316	142	321	142	473	61	197	94	136	63	117	82	404	52	316	42	360	34	309	24	435	20	333	48	534	35	296	16	527	154	170	128	187	121	315	305	131	181	233	221	296	153
YER066W	187	131	87	204	52	133	74	166	84	158	100	252	176	1087	244	520	204	642	107	496	25	418	11	547	19	163	20	233	14	175	32	320	16	161	16	397	102	140	99	157	85	272	156	75	80	94	121	128	97
YER067W	218	210	144	272	80	185	140	290	125	256	144	393	122	295	164	215	117	249	110	392	65	252	30	397	33	409	27	401	39	440	23	385	17	189	14	395	116	180	94	226	73	353	328	118	178	175	204	221	142
YER068W	200	130	125	163	77	109	126	172	100	156	129	203	194	422	365	306	259	307	18	186	42	66	31	54	41	125	16	72	27	140	24	283	21	160	22	305	110	93	87	85	96	154	276	107	150	151	170	169	72
YER069W	182	113	116	156	75	126	117	242	100	280	145	318	77	208	115	102	98	193	68	271	40	207	34	208	21	82	13	108	15	118	40	405	23	217	15	364	83	74	99	74	81	96	208	65	148	131	160	178	95
YER070W	115	68	103	104	44	79	107	186	79	193	106	236	12	0	23	0	8	0	67	149	39	122	19	182	18	90	12	103	10	111	18	169	13	85	9	171	71	25	47	30	50	53	119	38	66	65	81	66	75
YER071C	453	413	308	649	173	377	592	1346	475	1333	632	1709	439	2561	672	1393	489	1547	432	1508	225	1303	127	1138	76	845	45	1102	63	876	119	1367	86	700	57	1471	338	533	314	557	296	920	614	295	407	467	434	587	323
YER074W	353	204	229	301	129	152	386	568	345	540	414	765	94	65	171	52	143	47	224	245	121	199	82	212	49	56	36	91	43	194	60	579	46	342	33	597	223	154	199	156	198	282	598	194	332	303	414	346	282
YER074W-A	313	264	212	486	115	260	270	596	229	595	259	770	337	1571	535	840	422	1056	243	868	87	607	68	455	49	451	27	346	42	307	60	686	50	320	29	698	187	252	147	260	149	452	536	242	256	390	314	489	130
YER075C	0	0	0	0	0	0	0	0	0	0	0	0	0	0	0	0	0	0	0	0	0	0	0	0	0	0	0	0	0	0	0	0	0	0	0	0	0	0	0	0	0	0	0	0	0	0	0	0	0
YER076C	47	37	27	58	10	42	41	52	30	70	50	95	86	734	134	313	76	333	8	22	8	19	2	59	4	34	4	31	3	7	11	160	6	65	8	175	26	13	12	18	19	25	42	9	17	27	19	26	47
YER077C	84	56	53	93	23	73	48	93	31	85	44	96	15	0	16	0	11	0	12	5	26	1	5	0	11	70	10	70	7	87	11	111	11	49	4	112	39	39	24	54	35	73	122	29	62	79	74	71	119
YER078C	259	215	148	303	91	205	170	314	145	346	171	381	154	697	202	311	160	377	59	628	64	466	59	468	31	333	21	380	26	263	39	551	37	273	20	454	104	116	106	131	98	236	341	152	191	251	219	265	102
YER079W	28	20	23	31	10	19	132	189	153	170	103	317	6	0	9	0	2	0	154	407	44	359	34	365	6	39	3	80	4	31	4	93	6	43	7	91	25	0	13	0	14	0	28	11	22	11	14	10	6
YER080W	80	45	59	102	35	54	121	181	108	204	125	235	91	547	151	168	124	306	60	362	42	292	25	331	30	308	13	356	14	194	20	379	33	202	14	359	99	157	69	152	68	241	180	78	91	92	117	131	125
YER081W	306	249	203	420	104	224	179	323	170	342	200	445	22	1	57	0	33	0	66	346	65	270	50	281	46	170	22	181	29	124	42	489	29	261	20	447	134	131	126	114	112	226	403	165	186	234	246	303	131
YER082C	105	98	65	134	32	90	175	272	120	237	148	307	27	197	57	88	40	137	146	341	54	371	38	231	17	91	9	191	9	103	19	261	14	133	10	231	58	74	50	78	32	110	111	41	61	76	79	76	55
YER083C	146	110	118	178	50	92	59	86	39	86	45	132	111	549	193	317	131	364	40	201	26	107	10	131	33	243	29	161	19	134	35	580	31	271	13	541	101	110	66	136	75	234	355	178	219	289	239	348	160
YER085C	216	205	151	339	86	178	177	446	185	377	191	553	245	1603	480	968	322	1148	242	976	74	1069	44	934	44	331	17	401	29	264	49	591	42	335	21	637	96	142	104	146	110	208	299	140	177	233	209	275	144
YER086W	146	111	97	183	56	113	145	243	113	238	163	333	138	590	196	368	141	333	161	700	59	437	31	477	24	91	7	161	14	92	29	338	17	157	14	294	81	95	66	69	67	134	232	92	130	145	173	156	124
YER087C-B	0	0	0	0	0	0	0	0	0	0	0	0	0	0	0	0	0	0	0	0	0	0	0	0	0	0	0	0	0	0	0	0	0	0	0	0	0	0	0	0	0	0	0	0	0	0	0	0	0
YER087W	48	17	33	19	20	20	31	14	22	18	29	36	61	235	113	119	56	181	12	49	9	36	1	22	11	7	5	34	4	23	7	40	6	12	3	50	53	42	38	66	30	118	56	20	31	17	55	21	48
YER088C	88	62	71	94	38	42	78	113	77	122	83	161	18	49	29	1	22	6	50	102	35	107	21	104	15	99	13	66	15	75	13	92	11	64	11	110	34	13	40	22	32	19	130	53	67	64	108	76	39
YER089C	538	483	286	641	191	432	346	609	368	703	407	923	264	1527	478	792	246	713	350	2698	116	2178	84	2254	77	973	53	1236	46	1013	77	1120	58	652	44	1643	277	276	236	485	163	881	637	340	335	422	404	553	186
YER091C	160	88	84	148	54	54	68	103	74	149	86	187	16	0	30	0	34	0	36	143	21	190	12	148	23	173	16	182	15	174	29	305	16	142	14	367	113	72	70	91	77	170	285	85	168	118	190	173	75
YER092W	5	0	0	0	5	0	47	22	34	30	40	18	2	0	2	0	2	0	0	0	16	0	12	3	3	0	0	0	0	0	3	32	0	13	0	30	8	14	4	9	2	6	8	1	2	0	6	2	3
YER093C	188	67	117	119	67	56	127	90	77	107	95	149	34	26	55	30	36	44	14	187	27	91	19	136	38	198	19	204	27	161	39	293	37	121	15	232	152	107	109	101	102	143	332	55	178	84	227	81	49
YER094C	246	217	159	357	84	208	110	233	92	282	98	346	219	1402	386	752	262	897	136	455	32	341	24	208	45	283	14	272	33	194	41	441	35	247	22	454	119	120	88	98	104	192	291	177	204	235	228	292	215
YER095W	148	20	75	38	55	27	121	45	101	44	104	66	35	19	63	12	42	24	71	158	38	83	16	197	20	54	25	49	21	35	18	174	32	64	22	100	112	58	96	62	97	102	311	21	175	53	207	63	111
YER096W	202	168	130	264	62	176	94	194	81	216	92	238	92	540	135	198	79	237	2	161	23	166	20	253	38	373	33	462	21	390	25	422	31	240	26	455	130	140	84	125	92	242	312	108	213	191	204	242	122
YER098W	207	117	142	233	59	134	144	273	135	237	155	357	131	438	212	231	133	223	112	363	55	265	26	309	21	175	17	145	16	120	38	336	35	169	21	261	119	110	93	138	102	211	223	93	125	123	160	146	155
YER103W	0	0	0	0	0	0	0	0	0	0	0	0	0	0	0	0	0	0	0	0	0	0	0	0	0	0	0	0	0	0	0	0	0	0	0	0	0	0	0	0	0	0	0	0	0	0	0	0	0
YER106W	335	334	205	486	131	282	194	383	186	408	223	519	317	2194	463	1041	341	1290	307	2358	107	1874	59	1716	67	910	39	1106	49	966	63	759	42	388	34	678	209	267	154	281	149	474	485	242	251	340	331	395	249
YER107C	233	176	127	253	82	160	181	303	139	320	179	397	183	712	296	368	218	396	72	291	82	254	34	164	37	252	20	380	26	334	42	624	52	358	24	662	159	244	137	223	145	393	401	177	261	278	296	315	94
YER109C_2	53	38	43	45	19	31	23	57	32	39	32	53	8	0	21	0	7	0	35	67	15	33	6	73	16	4544	13	4403	14	4710	22	154	9	79	4	125	53	78	54	68	48	129	148	30	86	59	94	56	55
YER110C	62	6	31	21	36	8	95	37	94	32	108	46	26	22	41	12	27	12	25	12	33	15	16	0	15	83	6	52	8	45	24	90	20	46	5	91	47	12	48	13	54	11	136	17	82	21	90	27	28
YER111C	65	16	50	24	16	13	46	53	45	55	58	99	8	3	22	0	9	0	53	73	4	76	2	124	13	255	8	235	8	203	30	82	22	35	11	92	75	20	50	55	53	109	151	22	69	25	107	32	16
YER113C	49	37	21	60	10	41	71	104	74	107	80	151	8	0	8	0	1	0	54	127	21	97	11	193	1	46	1	44	0	31	3	44	2	15	3	69	23	7	11	15	13	33	20	1	10	5	14	10	2
YER114C	200	18	98	58	58	31	69	88	60	97	87	141	64	209	99	79	51	93	65	86	18	64	13	56	19	63	19	110	15	111	23	142	28	82	19	150	233	87	185	102	177	170	251	24	99	32	155	65	66
YER115C	359	292	242	475	120	300	159	344	129	371	169	477	286	642	427	314	271	516	255	1298	70	940	41	753	57	506	33	404	36	380	56	857	42	454	29	798	181	253	155	255	144	424	479	260	223	405	315	410	131
YER116C	172	129	124	189	69	141	198	417	191	391	216	531	90	242	152	113	110	123	84	377	81	285	48	190	15	36	22	38	14	59	47	588	40	345	24	630	129	176	120	242	131	307	318	160	221	233	225	247	165
YER117W	247	162	151	270	81	124	220	311	220	295	212	395	119	226	212	119	135	191	184	164	61	171	52	72	43	120	21	114	24	105	46	457	41	243	24	467	129	98	114	121	120	198	327	127	215	237	262	244	91
YER118C	1	0	1	0	0	0	0	0	1	0	1	0	1	0	0	0	0	0	0	0	0	0	0	0	0	0	1	0	0	0	0	0	0	0	1	0	3	0	1	0	2	0	2	0	2	0	5	2	0
YER120W	95	18	58	31	34	22	223	185	215	185	256	245	21	0	30	0	32	0	151	71	80	41	54	22	32	314	15	369	18	309	24	138	17	47	12	79	118	90	90	95	85	143	134	12	79	31	93	21	79
YER123W	317	269	182	400	127	231	99	80	87	69	116	107	102	132	125	61	81	43	58	44	31	15	18	19	46	113	19	104	32	49	45	462	42	250	21	410	124	52	104	41	130	86	454	149	308	231	318	277	131
YER124C	63	48	48	58	20	38	93	137	64	134	82	155	239	1179	281	680	193	838	59	128	26	97	16	186	18	169	8	98	11	78	31	301	17	154	16	275	50	76	50	82	61	126	135	49	72	78	93	74	26
YER125W	292	47	159	83	90	40	77	87	61	102	94	163	44	119	101	85	33	110	74	29	11	25	10	9	28	117	17	189	16	81	23	136	22	78	12	193	129	85	106	107	101	169	303	58	145	86	191	105	127
YER126C	144	13	83	15	46	10	105	34	83	34	120	29	45	7	83	16	37	6	57	32	40	8	19	0	18	28	17	31	19	25	24	27	20	11	6	31	97	2	67	7	89	11	287	7	151	8	195	11	67
YER127W	308	310	225	450	113	274	208	369	176	307	196	460	279	1298	416	660	277	639	125	452	66	483	53	303	60	251	22	325	39	279	51	615	36	323	32	670	214	211	128	216	159	318	555	266	326	376	351	423	300
YER128W	373	368	207	551	117	318	142	333	160	340	177	446	106	542	171	282	121	320	156	802	81	639	43	676	33	313	34	407	32	281	45	614	39	343	31	615	198	209	134	216	150	351	504	281	338	455	319	485	202
YER130C	349	250	256	416	124	260	201	339	202	344	203	427	196	650	292	305	187	357	176	470	60	374	51	218	53	212	34	289	42	283	55	734	41	343	22	607	179	154	137	153	151	253	515	249	298	338	329	431	285
YER131W	303	194	213	320	111	178	307	568	287	593	319	807	168	347	234	190	180	181	153	309	104	298	69	171	49	126	17	117	37	162	57	626	61	338	30	626	194	216	171	219	187	334	514	203	307	322	350	362	172
YER132C	94	42	75	49	50	25	41	70	41	58	40	63	16	0	23	0	27	0	63	6	9	8	5	15	18	52	19	60	16	64	35	184	24	87	16	188	91	30	74	38	87	41	119	7	64	19	72	16	56
YER133W	335	48	161	80	100	43	181	175	161	184	206	209	22	2	48	0	40	0	107	2	34	3	36	4	28	47	14	50	12	45	50	186	54	89	23	184	147	31	103	47	136	93	304	83	165	58	223	119	124
YER134C	292	257	193	405	108	215	302	620	240	687	295	920	94	350	147	167	111	124	237	1646	114	1595	83	1676	49	623	45	643	27	482	75	1110	64	578	36	1081	230	344	168	390	180	616	521	206	253	410	375	474	327
YER136W	324	188	221	275	103	181	269	324	201	360	265	406	93	131	133	70	100	99	84	329	87	112	56	146	64	301	30	384	41	262	58	761	40	361	27	680	172	143	176	146	154	212	353	121	220	203	277	226	157
YER140W	236	178	160	262	91	170	188	302	170	323	192	416	71	199	112	79	85	129	197	330	70	271	50	194	41	315	22	241	25	222	51	534	36	331	22	546	145	196	143	224	113	366	327	138	188	221	229	270	164
YER141W	182	94	107	145	61	83	184	328	156	319	170	516	34	2	56	9	32	6	89	583	80	439	37	322	40	595	22	572	29	516	30	661	37	321	21	605	171	279	165	361	133	556	310	127	176	188	247	221	203
YER142C	271	216	176	303	89	196	175	353	150	375	195	500	124	604	192	298	133	368	77	674	78	567	47	554	54	506	34	500	26	365	55	759	45	410	24	769	202	291	159	320	138	465	460	218	305	379	330	410	170
YER143W	293	247	194	352	111	227	214	338	169	349	195	493	152	468	240	319	175	226	153	1180	68	820	54	827	64	662	33	585	59	590	77	912	47	474	35	844	221	269	182	315	182	466	535	246	318	398	356	443	168
YER145C	0	0	0	0	0	0	0	0	0	0	0	0	0	0	0	0	0	0	0	0	0	0	0	0	0	0	0	0	0	0	0	0	0	0	0	0	0	0	0	0	0	0	0	0	0	0	0	0	0
YER146W	19	11	16	28	9	14	37	74	38	61	41	94	1	0	11	0	3	0	37	87	13	71	8	26	6	45	5	24	5	43	7	46	3	19	2	29	13	0	11	0	8	0	35	19	30	29	27	33	27
YER147C	270	211	167	328	92	206	153	256	131	264	141	304	44	3	63	0	44	0	150	491	70	376	41	365	49	450	28	536	43	543	53	534	40	273	26	580	147	158	123	184	125	334	402	138	212	245	288	276	88
YER148W	344	291	183	407	104	246	280	545	295	576	293	783	265	1348	425	676	301	767	282	1116	112	1035	87	1126	62	362	30	395	33	320	68	676	46	361	33	720	233	271	164	280	156	450	597	305	338	519	408	529	197
YER149C	0	0	0	0	0	0	0	0	0	0	0	0	0	0	0	0	0	0	0	0	0	0	0	0	0	0	0	0	0	0	0	0	0	0	0	0	0	0	0	0	0	0	0	0	0	0	0	0	0
YER150W	144	75	93	118	37	64	147	192	120	190	138	257	47	180	90	130	50	154	139	403	51	319	25	185	30	412	15	422	16	273	17	348	22	150	8	281	77	54	75	72	55	97	184	86	106	116	106	125	123
YER151C	150	106	85	158	63	84	35	40	30	39	31	43	24	0	34	0	31	0	29	61	9	117	6	84	26	57	9	127	16	65	15	103	14	59	10	130	87	53	72	51	64	71	95	21	75	24	71	35	56
YER152C	0	0	0	0	0	0	0	0	0	0	0	0	0	0	0	0	0	0	0	0	0	0	0	0	0	0	0	0	0	0	0	0	0	0	0	0	0	0	0	0	0	0	0	0	0	0	0	0	0
YER153C	109	53	55	79	42	53	12	3	11	5	18	5	15	2	34	0	23	0	0	0	2	0	4	4	22	247	15	238	16	252	21	235	23	103	13	216	88	91	72	107	59	199	118	28	76	58	99	59	88
YER154W	151	161	100	269	59	143	59	138	40	125	78	181	12	0	18	0	17	0	56	120	30	75	18	102	17	203	15	184	10	128	15	172	13	108	10	228	65	61	49	57	46	108	110	23	69	42	67	50	28
YER156C	200	187	124	334	71	156	188	455	200	521	207	643	224	1015	265	377	232	539	250	1000	93	743	62	622	32	194	24	158	25	144	33	453	22	219	15	364	109	93	72	106	94	190	235	130	137	191	161	254	92
YER157W	173	97	116	167	81	75	130	253	132	246	163	300	251	1406	435	780	289	824	93	472	63	490	27	419	35	152	17	233	28	144	54	355	34	170	23	405	110	70	101	84	96	90	324	114	207	184	204	207	151
YER158C	289	279	206	420	99	266	134	220	112	232	136	250	76	281	123	142	88	128	94	245	51	155	27	245	26	146	9	172	15	134	45	282	36	174	19	314	123	81	97	83	88	166	365	122	205	151	224	210	43
YER159C	316	259	193	434	120	239	310	565	242	552	294	758	33	0	77	0	65	0	295	795	136	830	71	763	50	278	34	312	21	236	56	601	34	303	27	635	155	188	171	209	168	347	534	265	298	360	346	403	227
YER161C	188	146	104	271	51	162	141	240	112	230	135	309	21	0	51	0	23	0	83	509	54	381	35	595	24	394	23	379	26	331	28	330	23	186	15	361	107	132	92	151	94	226	322	190	175	278	211	299	89
YER163C	229	201	127	311	61	196	82	205	93	162	100	290	39	15	37	12	25	24	101	197	36	173	21	178	27	240	27	178	20	229	40	351	16	193	21	372	117	164	103	166	96	306	351	166	195	266	221	330	74
YER164W	386	95	215	149	117	87	132	57	136	60	137	62	230	797	359	378	243	402	64	95	40	63	20	60	55	177	33	206	54	177	60	245	52	126	28	262	232	68	201	70	200	109	311	30	182	46	220	53	142
YER165W	100	50	67	79	36	35	126	231	91	267	113	356	18	0	25	0	23	0	106	55	38	85	23	6	17	2	8	11	9	24	30	259	25	83	16	219	68	35	57	69	75	81	177	73	116	94	111	115	80
YER167W	325	67	207	95	105	61	182	141	158	190	189	176	123	200	201	84	123	106	81	94	55	52	39	54	51	448	27	312	33	250	45	269	37	111	27	195	146	35	122	33	127	76	451	68	255	122	288	115	88
YER168C	142	137	86	175	45	122	147	197	116	205	120	302	188	636	232	406	192	422	90	461	55	423	29	378	36	652	24	779	29	748	22	347	15	226	13	456	90	96	78	123	79	172	234	141	150	204	192	254	102
YER169W	4	3	1	2	1	3	9	3	5	1	6	8	1	0	5	0	2	0	0	0	2	0	1	0	1	0	0	0	2	8	0	5	0	4	0	5	4	5	6	5	4	8	8	6	9	2	4	7	1
YER171W	111	54	64	90	38	67	102	181	86	156	97	203	163	744	218	421	186	522	108	266	38	193	16	121	15	118	14	70	16	110	20	296	17	177	17	267	64	53	55	58	53	98	159	74	98	120	124	128	56
YER172C	98	20	54	31	35	13	58	36	39	30	40	24	7	0	35	0	10	0	0	12	15	24	7	6	22	31	5	47	10	22	18	46	15	24	9	40	58	15	47	12	41	20	135	15	91	15	112	27	23
YER173W	153	106	125	175	67	104	156	353	164	356	184	521	193	1084	254	515	212	640	161	504	59	323	33	497	26	164	20	297	21	207	47	463	27	257	17	405	119	101	86	113	78	167	245	107	135	161	184	206	94
YER174C	232	179	164	269	76	173	168	293	127	257	139	350	124	554	209	170	156	270	153	637	74	618	39	485	42	287	25	346	26	273	57	644	33	313	17	644	157	167	111	202	126	342	360	170	200	261	260	269	105
YER175C	341	364	244	540	110	355	206	344	173	386	214	452	173	695	240	354	176	405	207	475	76	478	52	418	51	395	27	480	24	456	66	614	39	346	33	655	141	125	115	126	122	232	409	213	240	286	252	349	87
YER175W-A	118	125	82	188	27	112	63	125	59	97	75	132	172	1299	275	664	204	792	59	442	32	302	12	454	32	183	10	272	20	188	24	261	16	166	10	268	71	104	72	124	59	159	209	102	124	188	114	227	70
YER176W	120	44	71	45	51	22	20	15	17	13	9	30	83	193	150	66	71	104	14	12	8	84	6	30	18	218	17	163	9	176	10	87	16	49	8	98	143	89	92	132	54	253	61	5	25	10	36	9	54
YER177W	11	0	9	0	5	0	0	0	0	0	0	0	4	0	8	0	3	0	0	0	0	0	0	0	3	38	6	9	4	27	4	10	0	3	0	3	6	0	1	1	10	1	33	2	30	8	35	7	3
YER178W	0	0	0	0	0	0	0	0	0	0	0	0	0	0	0	0	0	0	0	0	0	0	0	0	0	0	0	0	0	0	0	0	0	0	0	0	0	0	0	0	0	0	0	0	0	0	0	0	0
YER179W	150	121	90	166	57	113	63	143	76	165	81	263	360	3692	648	1468	336	1743	63	430	17	403	10	449	35	989	17	1136	18	886	27	440	24	230	21	590	115	161	96	214	80	387	240	111	109	137	160	195	121
YER180C	189	154	78	252	46	122	66	107	51	84	61	103	79	425	129	260	113	302	28	11	25	42	20	11	44	271	19	489	16	321	27	250	23	191	15	289	106	116	99	172	81	240	97	38	62	60	61	74	119
YER180C-A	23	12	24	13	10	12	18	79	35	85	35	113	42	296	94	117	44	117	0	39	13	31	6	0	20	78	6	54	12	64	9	158	12	112	6	152	35	56	39	61	31	106	100	40	57	88	52	89	26
YER182W	268	222	152	324	85	205	230	445	160	410	193	587	199	1060	301	556	213	614	150	663	94	622	57	643	54	524	32	675	25	520	47	560	41	286	19	645	168	238	113	275	98	440	364	178	213	292	248	315	126
YER183C	424	361	224	459	120	321	142	292	147	278	158	440	147	813	272	376	123	421	167	1346	45	1194	17	1291	49	1865	26	1642	31	1436	47	857	70	454	38	1128	206	235	159	301	115	623	433	281	189	293	312	477	199
YER184C	0	0	0	0	0	0	0	0	0	0	0	0	0	0	0	0	0	0	0	0	0	0	0	0	0	0	0	0	0	0	0	0	0	0	0	0	0	0	0	0	0	0	0	0	0	0	0	0	0
YER185W	280	282	224	498	133	282	261	502	209	519	289	720	372	2122	624	962	432	1213	134	1295	113	998	65	1212	49	373	30	398	39	399	55	720	49	354	33	714	188	273	176	337	178	524	520	225	281	378	323	385	213
YER186C	346	279	213	391	106	243	287	675	243	649	326	818	112	513	173	235	123	300	113	520	112	553	55	536	48	349	37	372	33	372	73	825	47	436	40	839	211	381	178	373	184	598	496	227	312	450	345	421	206
YER187W	0	0	0	0	0	0	0	0	0	0	0	0	0	0	0	0	0	0	0	0	0	0	0	0	0	0	0	0	0	0	0	0	0	0	0	0	0	0	0	0	0	0	0	0	0	0	0	0	0
YFL001W	149	52	99	75	55	42	169	222	141	211	166	286	140	12067	200	5075	148	6118	40	13464	63	12688	45	14017	53	10164	18	12681	32	9984	27	272	20	142	17	178	155	140	87	165	101	272	381	136	186	217	248	273	78
YFL002C	289	262	212	357	108	214	189	349	139	343	174	452	213	1064	334	609	270	646	178	357	81	306	44	309	47	263	31	302	39	187	69	526	51	299	35	568	150	266	166	266	154	367	488	197	284	341	312	359	166
YFL005W	206	146	128	193	75	115	125	192	102	190	149	314	27	67	54	37	33	39	26	158	29	126	10	115	17	320	10	330	12	295	14	134	13	65	11	180	74	58	44	53	30	121	132	38	45	53	80	49	79
YFL008W	266	151	199	242	99	102	194	279	189	294	232	410	118	384	152	210	125	238	103	481	64	260	38	406	56	323	27	211	17	242	80	424	58	242	29	431	160	66	125	93	125	122	375	83	222	146	282	185	136
YFL009W	253	154	168	273	87	156	147	282	128	278	154	371	271	1414	431	838	318	881	188	312	47	237	40	265	56	451	27	705	30	558	47	508	29	266	15	477	152	210	156	229	132	371	388	160	260	244	290	275	229
YFL010C	26	22	15	22	9	16	101	90	77	86	104	112	163	264	220	107	145	143	134	178	27	139	20	114	7	55	2	22	7	29	8	144	5	61	2	136	30	24	27	43	16	62	32	18	21	15	23	26	4
YFL010W-A	0	0	0	0	0	0	0	0	0	0	0	0	0	0	0	0	0	0	0	0	0	0	0	0	0	0	0	0	0	0	0	0	0	0	0	0	0	0	0	0	0	0	0	0	0	0	0	0	0
YFL013C	227	217	147	293	68	168	101	199	91	207	112	224	58	188	120	113	73	109	100	138	32	113	14	91	25	141	21	121	20	121	37	347	22	174	14	334	130	148	99	176	101	289	306	109	172	170	204	245	106
YFL014W	167	163	121	253	50	141	142	256	120	231	139	278	86	453	135	200	104	297	171	1534	74	1410	48	1365	34	158	11	149	15	121	35	475	25	264	12	430	90	95	91	119	80	248	273	112	140	216	152	214	64
YFL016C	347	256	232	391	137	221	415	715	358	709	405	972	669	4598	950	2119	767	2775	424	2443	165	2350	96	2710	83	1265	70	1282	70	1187	46	739	41	384	31	693	279	363	185	398	232	741	709	260	379	412	437	483	415
YFL017C	43	42	28	52	14	21	48	158	61	174	63	236	4	27	17	2	9	15	38	40	24	54	14	76	5	130	8	137	4	58	10	103	3	57	4	106	29	32	24	37	13	52	43	21	19	20	18	38	25
YFL018C	141	92	81	133	57	84	129	308	127	252	159	317	63	363	107	129	64	178	63	187	43	233	32	178	25	137	4	141	11	157	27	355	19	188	10	319	81	118	68	148	95	228	243	112	134	193	155	197	54
YFL021W	63	24	32	50	20	32	179	160	138	191	172	260	32	63	38	61	25	28	137	234	58	89	27	181	2	5	2	0	4	10	12	32	6	20	3	35	27	5	12	5	18	10	55	25	30	36	37	43	31
YFL022C	149	126	83	175	69	86	70	83	56	80	59	95	39	141	52	64	53	74	132	31	22	23	11	85	20	28	14	67	18	52	27	237	19	128	8	198	70	103	71	127	57	158	206	102	122	158	147	146	80
YFL024C	0	0	0	0	0	0	0	0	0	0	0	0	0	0	0	0	0	0	0	0	0	0	0	0	0	0	0	0	0	0	0	0	0	0	0	0	0	0	0	0	0	0	0	0	0	0	0	0	0
YFL026W	182	174	106	269	68	157	128	246	115	310	157	339	165	561	191	265	188	335	91	172	46	140	25	161	48	435	22	499	12	342	38	485	33	226	19	479	111	186	113	216	127	386	243	111	150	162	155	215	97
YFL028C	259	288	167	394	76	264	118	194	107	222	144	333	83	371	136	186	96	245	66	378	47	316	20	274	22	304	21	289	19	156	42	422	25	231	20	435	99	159	71	169	91	246	267	136	172	204	172	222	89
YFL029C	177	166	150	336	84	157	128	149	82	236	102	320	170	754	220	390	158	414	87	119	38	115	20	93	54	243	16	315	16	270	39	412	30	240	17	338	98	183	95	191	82	285	263	145	183	166	99	288	103
YFL036W	0	0	0	0	0	0	0	0	0	0	0	0	0	0	0	0	0	0	0	0	0	0	0	0	0	0	0	0	0	0	0	0	0	0	0	0	0	0	0	0	0	0	0	0	0	0	0	0	0
YFL037W	139	0	82	0	36	0	268	0	221	0	272	0	41	0	83	2	38	0	104	1	54	1	38	0	24	0	18	0	22	0	12	0	8	0	9	0	117	0	98	0	112	0	337	0	171	0	229	0	81
YFL038C	406	264	223	423	145	248	247	419	198	416	274	565	510	2994	765	1641	494	2040	153	736	108	693	67	572	68	566	34	409	47	304	96	800	71	492	51	787	224	303	201	362	218	601	793	311	473	460	543	529	320
YFL040W	24	16	9	13	5	14	45	103	31	78	43	94	2	0	6	0	6	0	8	133	14	47	5	45	6	63	2	4	4	24	5	67	1	33	1	48	12	19	7	26	15	30	36	19	26	31	24	28	3
YFL041W-A	194	123	97	200	78	136	122	244	120	234	148	348	94	787	163	286	113	343	165	851	39	562	20	677	32	267	13	434	19	289	34	377	25	225	18	406	133	181	111	214	95	387	344	172	180	274	211	349	175
YFL042C	81	59	55	99	31	34	17	22	24	18	14	34	8	0	18	0	9	0	0	3	6	0	1	7	12	88	9	120	6	97	16	112	12	50	7	125	57	36	40	47	30	108	99	42	49	57	70	53	27
YFL045C	298	327	200	509	107	278	180	386	138	381	214	459	199	1025	276	511	202	583	179	730	76	595	47	513	49	310	39	471	27	201	46	538	23	281	25	531	213	292	151	295	185	442	525	290	350	441	362	492	223
YFL046W	0	0	0	0	0	0	0	0	0	0	0	0	0	0	0	0	0	0	0	0	0	0	0	0	0	0	0	0	0	0	0	0	0	0	0	0	0	0	0	0	0	0	0	0	0	0	0	0	0
YFL047W	168	127	123	175	55	113	166	220	126	270	152	288	148	387	247	273	165	314	111	414	76	373	32	399	50	391	24	418	32	341	33	538	40	281	23	511	124	70	97	102	100	138	367	128	186	198	235	247	60
YFL049W	132	65	87	87	45	60	85	130	78	138	105	129	182	738	298	339	210	464	65	74	32	88	13	59	39	244	18	314	22	223	26	348	26	193	10	368	86	121	95	138	85	195	265	101	155	146	160	194	65
YFL050C	87	37	60	66	33	22	56	93	52	94	76	94	27	73	67	39	39	23	41	92	17	111	14	84	20	147	14	122	12	127	21	218	14	108	9	232	63	62	62	92	63	108	172	53	104	87	120	98	72
YFL051C	270	311	176	439	82	254	159	436	153	467	196	578	365	2489	513	1269	379	1634	245	838	69	527	37	560	51	794	26	766	33	612	54	955	56	436	33	854	150	205	130	263	112	480	404	239	227	317	259	381	227
YFL052W	242	172	126	259	77	148	84	132	62	127	91	158	189	999	277	536	222	566	87	418	37	499	18	373	40	372	22	285	25	267	38	436	31	286	20	477	107	180	89	163	112	297	337	182	229	311	263	297	104
YFL053W	0	0	0	0	0	0	0	0	0	0	0	0	0	0	0	0	0	0	0	0	0	0	0	0	0	0	0	0	0	0	0	0	0	0	0	0	0	0	0	0	0	0	0	0	0	0	0	0	0
YFL054C	50	30	47	48	18	27	50	70	63	56	59	80	141	803	231	271	129	287	24	99	31	86	21	61	16	58	4	57	8	39	14	193	17	95	10	180	47	45	49	52	48	96	120	34	55	64	77	80	26
YFL055W	0	0	0	0	0	0	0	0	0	0	0	0	0	0	0	0	0	0	0	0	0	0	0	0	0	0	0	0	0	0	0	0	0	0	0	0	0	0	0	0	0	0	0	0	0	0	0	0	0
YFL056C	47	70	24	109	15	62	87	253	64	191	80	346	9	0	22	0	16	0	59	867	23	528	8	263	18	547	6	637	13	408	13	151	6	108	5	142	47	173	36	204	47	251	106	143	88	182	84	172	90
YFL060C	97	64	79	127	27	64	99	133	98	139	107	186	201	1188	317	456	242	631	99	927	46	625	24	579	19	414	20	252	14	185	41	450	28	253	9	436	77	102	66	116	68	155	242	99	107	135	147	172	204
YFR001W	209	152	118	217	87	148	234	450	197	491	247	558	175	27383	275	12886	194	15999	247	58416	83	53284	62	54489	50	18000	38	21149	28	17414	27	668	32	363	13	737	139	165	104	150	127	256	381	236	213	401	277	447	128
YFR002W	21	6	10	5	9	3	168	266	154	274	167	366	5	0	3	0	1	0	119	155	58	95	26	88	1	5	1	6	1	1	2	13	4	4	1	6	10	16	7	6	3	16	15	2	5	4	7	7	1
YFR004W	224	142	161	281	75	142	196	323	174	312	191	479	96	351	142	186	120	159	90	413	53	419	42	361	35	135	20	112	25	54	48	733	50	410	27	734	200	184	149	176	145	296	465	215	249	356	290	401	156
YFR005C	0	0	2	0	2	0	73	92	64	84	71	128	3	0	1	0	0	0	87	8	19	2	15	14	0	0	0	0	0	0	0	0	1	0	0	0	2	0	0	0	1	0	5	0	0	2	0	2	0
YFR008W	0	0	0	0	0	0	0	0	0	0	0	0	0	0	0	0	0	0	0	0	0	0	0	0	0	0	0	0	0	0	0	0	0	0	0	0	0	0	0	0	0	0	0	0	0	0	0	0	0
YFR009W	183	116	135	201	67	111	150	268	116	262	146	329	98	229	105	134	71	140	27	198	46	244	38	204	33	88	19	139	19	105	45	433	32	241	16	455	162	167	113	212	109	324	364	137	204	203	222	196	81
YFR010W	161	172	110	252	60	162	85	152	96	175	109	193	16	0	38	0	22	0	43	33	34	20	16	16	23	176	13	260	22	107	27	356	21	181	14	298	77	81	80	74	68	117	251	79	145	146	136	170	66
[truncated: 2,872 more rows]
[truncated: 39 more columns]

## Sheet: Normalized Read Counts
gene	BC187_YPD_Rep1_Gen0	BC187_YPD_Rep1_Gen10	BC187_YPD_Rep2_Gen0	BC187_YPD_Rep2_Gen10	BC187_YPD_Rep3_Gen0	BC187_YPD_Rep3_Gen10	BY4743_YPD_Rep1_Gen0	BY4743_YPD_Rep1_Gen10	BY4743_YPD_Rep2_Gen0	BY4743_YPD_Rep2_Gen10	BY4743_YPD_Rep3_Gen0	BY4743_YPD_Rep3_Gen10	DBVPG1373_YPD_Rep1_Gen0	DBVPG1373_YPD_Rep1_Gen10	DBVPG1373_YPD_Rep2_Gen0	DBVPG1373_YPD_Rep2_Gen10	DBVPG1373_YPD_Rep3_Gen0	DBVPG1373_YPD_Rep3_Gen10	NCYC3290_YPD_Rep1_Gen0	NCYC3290_YPD_Rep1_Gen10	NCYC3290_YPD_Rep2_Gen0	NCYC3290_YPD_Rep2_Gen10	NCYC3290_YPD_Rep3_Gen0	NCYC3290_YPD_Rep3_Gen10	Y12_YPD_Rep1_Gen0	Y12_YPD_Rep1_Gen10	Y12_YPD_Rep2_Gen0	Y12_YPD_Rep2_Gen10	Y12_YPD_Rep3_Gen0	Y12_YPD_Rep3_Gen10	Y2209_YPD_Rep1_Gen0	Y2209_YPD_Rep1_Gen10	Y2209_YPD_Rep2_Gen0	Y2209_YPD_Rep2_Gen10	Y2209_YPD_Rep3_Gen0	Y2209_YPD_Rep3_Gen10	Y389_YPD_Rep1_Gen0	Y389_YPD_Rep1_Gen10	Y389_YPD_Rep2_Gen0	Y389_YPD_Rep2_Gen10	Y389_YPD_Rep3_Gen0	Y389_YPD_Rep3_Gen10	Y7568_YPD_Rep1_Gen0	Y7568_YPD_Rep1_Gen10	Y7568_YPD_Rep2_Gen0	Y7568_YPD_Rep2_Gen10	Y7568_YPD_Rep3_Gen0	Y7568_YPD_Rep3_Gen10	YJM1273_YPD_Rep1_Gen0
YDR225W	101	102	101	95	94	112	110	103	98	120	136	121	10	0	17	0	13	0	79	98	64	125	65	82	62	21	59	40	39	11	40	42	74	42	47	26	44	23	24	31	47	22	41	34	60	35	32	39	29
YIL077C	367	394	366	412	290	431	325	360	304	397	347	428	441	415	419	426	370	467	171	173	245	201	252	188	229	244	337	208	311	214	251	330	379	383	434	386	274	304	279	279	302	332	245	364	305	274	307	347	278
YML058W	#N/A	#N/A	#N/A	#N/A	#N/A	#N/A	#N/A	#N/A	#N/A	#N/A	#N/A	#N/A	#N/A	#N/A	#N/A	#N/A	#N/A	#N/A	#N/A	#N/A	#N/A	#N/A	#N/A	#N/A	#N/A	#N/A	#N/A	#N/A	#N/A	#N/A	#N/A	#N/A	#N/A	#N/A	#N/A	#N/A	#N/A	#N/A	#N/A	#N/A	#N/A	#N/A	#N/A	#N/A	#N/A	#N/A	#N/A	#N/A	#N/A
YMR115W	#N/A	#N/A	#N/A	#N/A	#N/A	#N/A	#N/A	#N/A	#N/A	#N/A	#N/A	#N/A	#N/A	#N/A	#N/A	#N/A	#N/A	#N/A	#N/A	#N/A	#N/A	#N/A	#N/A	#N/A	#N/A	#N/A	#N/A	#N/A	#N/A	#N/A	#N/A	#N/A	#N/A	#N/A	#N/A	#N/A	#N/A	#N/A	#N/A	#N/A	#N/A	#N/A	#N/A	#N/A	#N/A	#N/A	#N/A	#N/A	#N/A
YNR059W	70	112	84	90	112	102	329	308	335	339	286	315	17	0	20	0	29	0	320	296	303	326	308	322	167	143	161	137	155	152	113	134	126	109	62	121	74	216	121	198	120	216	81	68	69	69	63	66	109
YDL161W	#N/A	#N/A	#N/A	#N/A	#N/A	#N/A	#N/A	#N/A	#N/A	#N/A	#N/A	#N/A	#N/A	#N/A	#N/A	#N/A	#N/A	#N/A	#N/A	#N/A	#N/A	#N/A	#N/A	#N/A	#N/A	#N/A	#N/A	#N/A	#N/A	#N/A	#N/A	#N/A	#N/A	#N/A	#N/A	#N/A	#N/A	#N/A	#N/A	#N/A	#N/A	#N/A	#N/A	#N/A	#N/A	#N/A	#N/A	#N/A	#N/A
YGR138C	211	189	195	188	250	187	227	235	253	246	217	256	95	96	71	56	96	38	302	454	192	330	168	283	264	43	176	73	220	57	226	198	294	190	233	216	248	185	197	210	255	191	236	164	200	221	213	181	262
YDR379W	21	10	29	10	45	13	219	239	294	276	254	236	#N/A	#N/A	#N/A	#N/A	#N/A	#N/A	84	101	204	126	177	116	26	4	44	12	26	6	0	10	21	9	0	5	26	0	18	0	35	0	18	17	16	6	15	8	#N/A
YLR262C	710	900	712	906	607	827	580	681	648	713	521	697	431	224	398	226	388	252	404	375	612	357	570	333	642	306	644	395	608	409	873	1129	715	982	946	933	676	787	644	763	743	874	670	777	677	826	681	845	647
YNR073C	277	303	212	279	250	295	189	131	187	185	219	213	36	0	56	0	33	0	291	527	122	498	140	668	290	592	146	651	207	533	218	173	189	161	233	211	340	153	170	285	145	284	160	159	142	74	153	158	55
YOL018C	59	21	87	23	54	15	45	18	55	35	51	19	17	0	18	0	11	0	21	0	47	0	47	7	79	23	59	77	78	44	81	24	63	37	109	14	102	52	76	56	88	60	48	15	56	16	58	23	68
YFR049W	476	599	510	589	589	522	495	616	502	608	487	644	155	38	146	28	167	33	501	714	647	696	467	822	449	196	425	224	323	171	331	372	368	355	496	399	474	481	380	503	422	467	447	606	421	487	427	554	327
YMR257C	201	170	202	120	201	157	270	281	292	318	276	287	238	331	337	193	181	208	451	387	274	403	271	297	132	137	220	131	233	102	194	154	116	159	155	166	236	267	255	258	249	261	172	98	182	88	147	118	161
YNL108C	94	118	118	117	161	155	187	150	194	169	164	155	17	0	20	0	29	0	131	66	227	81	140	70	150	53	88	60	116	60	137	188	200	182	202	170	108	90	112	80	120	74	120	137	113	150	118	129	96
YPL109C	64	52	55	74	67	40	204	190	227	175	170	161	327	377	232	463	288	439	189	324	151	418	224	305	70	19	15	5	78	11	89	81	42	65	47	66	77	76	79	87	50	76	39	32	49	36	44	30	36
YDR410C	324	238	305	232	228	286	278	275	289	276	258	273	293	174	287	228	261	232	276	322	280	328	280	296	334	164	307	172	349	154	275	466	400	488	341	459	325	376	334	361	330	413	254	362	274	328	281	357	273
YIL015W	#N/A	#N/A	#N/A	#N/A	#N/A	#N/A	#N/A	#N/A	#N/A	#N/A	#N/A	#N/A	#N/A	#N/A	#N/A	#N/A	#N/A	#N/A	#N/A	#N/A	#N/A	#N/A	#N/A	#N/A	#N/A	#N/A	#N/A	#N/A	#N/A	#N/A	#N/A	#N/A	#N/A	#N/A	#N/A	#N/A	#N/A	#N/A	#N/A	#N/A	#N/A	#N/A	#N/A	#N/A	#N/A	#N/A	#N/A	#N/A	#N/A
YJL125C	327	380	346	353	370	384	342	373	366	352	323	385	276	168	296	150	221	134	470	474	384	452	364	420	229	123	249	156	349	116	291	303	294	386	357	324	297	296	398	285	346	317	367	347	307	333	376	383	340
YMR297W	100	110	118	114	147	129	45	115	65	104	91	108	29	0	20	0	31	0	34	62	93	75	93	88	141	80	102	81	116	104	121	149	137	184	140	114	120	166	149	151	145	168	119	110	127	132	124	111	44
YOL086C	336	228	385	175	343	193	299	201	356	188	282	176	112	14	140	16	132	7	105	29	367	24	346	35	317	39	439	46	336	42	299	237	252	200	310	243	325	103	358	149	327	121	367	227	387	224	359	240	229
YPL243W	453	496	361	475	393	515	376	414	395	399	349	411	150	43	147	25	116	33	501	284	361	283	486	299	422	135	366	147	362	226	550	505	410	535	636	528	451	430	319	400	340	344	393	398	443	465	434	472	481
YIL005W	551	591	577	581	629	571	760	721	799	656	744	649	291	97	371	71	305	69	693	334	792	341	710	357	660	277	600	245	647	248	542	524	610	495	698	504	666	640	632	741	739	692	590	564	608	508	628	441	546
YKL021C	286	332	351	365	317	337	242	263	253	294	286	268	179	181	178	210	221	204	142	120	227	143	271	149	229	100	146	140	168	103	186	243	147	312	217	276	261	252	270	229	186	299	204	247	198	262	207	253	356
YMR290C	485	406	450	434	437	431	529	476	500	446	497	449	312	190	368	165	321	189	299	145	466	147	486	152	361	135	571	93	505	96	356	388	347	413	512	373	356	342	440	336	406	314	504	374	428	394	465	433	231
YOR133W	29	2	38	5	36	8	19	6	17	2	39	7	#N/A	#N/A	#N/A	#N/A	#N/A	#N/A	#N/A	#N/A	#N/A	#N/A	#N/A	#N/A	#N/A	#N/A	#N/A	#N/A	#N/A	#N/A	#N/A	#N/A	#N/A	#N/A	#N/A	#N/A	33	0	18	0	16	0	26	5	38	2	23	3	13
YPL029W	70	60	79	70	36	76	130	114	136	96	107	125	26	0	24	0	29	0	81	54	111	60	112	28	114	21	117	46	129	45	129	85	84	93	47	73	120	80	112	124	91	127	91	108	109	88	112	85	109
YBR288C	#N/A	#N/A	#N/A	#N/A	#N/A	#N/A	#N/A	#N/A	#N/A	#N/A	#N/A	#N/A	#N/A	#N/A	#N/A	#N/A	#N/A	#N/A	#N/A	#N/A	#N/A	#N/A	#N/A	#N/A	#N/A	#N/A	#N/A	#N/A	#N/A	#N/A	16	24	21	28	16	21	#N/A	#N/A	#N/A	#N/A	#N/A	#N/A	#N/A	#N/A	#N/A	#N/A	#N/A	#N/A	#N/A
YDL089W	368	294	332	336	366	331	255	343	253	310	247	332	150	59	109	81	105	95	299	281	262	266	290	174	282	158	205	142	246	168	299	219	284	225	217	241	228	178	228	213	230	178	258	247	287	243	262	273	416
YDR284C	298	380	262	357	281	352	274	260	265	258	256	278	181	95	211	68	203	48	173	106	227	73	187	69	299	50	234	48	259	64	154	172	231	217	357	148	246	323	243	324	242	291	195	247	260	255	235	241	299
YDR348C	209	112	180	124	236	98	223	233	294	225	247	241	74	77	90	44	76	58	417	517	326	430	280	482	414	328	395	397	401	389	170	257	95	141	93	171	212	128	170	140	267	104	122	98	85	106	138	122	437
YER008C	198	25	183	33	174	21	206	92	222	101	221	95	74	0	67	0	62	0	184	37	204	21	224	39	220	6	190	2	246	2	234	54	200	53	186	51	248	71	288	47	286	69	281	95	258	79	255	87	117
YER031C	#N/A	#N/A	#N/A	#N/A	#N/A	#N/A	#N/A	#N/A	#N/A	#N/A	#N/A	#N/A	#N/A	#N/A	#N/A	#N/A	#N/A	#N/A	#N/A	#N/A	#N/A	#N/A	#N/A	#N/A	#N/A	#N/A	#N/A	#N/A	#N/A	#N/A	#N/A	#N/A	#N/A	#N/A	#N/A	#N/A	#N/A	#N/A	#N/A	#N/A	#N/A	#N/A	#N/A	#N/A	#N/A	#N/A	#N/A	#N/A	#N/A
YER122C	450	411	483	385	352	448	440	473	430	406	416	417	760	707	755	759	807	696	486	296	478	259	271	253	414	107	468	127	298	109	445	410	410	481	403	412	494	432	477	435	393	413	389	408	458	430	439	386	390
YGL015C	277	299	286	258	321	291	287	300	306	314	292	322	286	234	249	235	341	208	333	293	390	243	336	277	202	119	220	135	246	113	202	206	137	200	248	208	271	399	255	347	264	355	218	178	240	227	258	191	398
YGL226W	188	238	202	184	228	235	244	248	246	293	254	248	379	148	334	165	357	170	315	84	303	84	159	83	167	84	176	84	181	85	137	223	221	222	295	244	241	201	240	182	230	146	216	220	223	213	236	217	120
YGR233C	482	462	495	436	415	416	490	448	521	528	424	469	501	649	448	556	461	640	690	1456	559	1290	570	1304	510	385	512	421	440	376	574	420	431	429	372	455	515	483	449	510	488	394	466	401	492	437	500	439	629
YHL013C	536	616	539	627	468	696	410	620	531	635	460	593	317	286	389	343	361	307	619	477	396	399	476	402	370	187	337	224	466	218	356	408	389	449	434	360	474	556	501	543	466	525	407	403	396	410	393	391	377
YJR006W	#N/A	#N/A	#N/A	#N/A	#N/A	#N/A	#N/A	#N/A	#N/A	#N/A	#N/A	#N/A	#N/A	#N/A	#N/A	#N/A	#N/A	#N/A	#N/A	#N/A	#N/A	#N/A	#N/A	#N/A	#N/A	#N/A	#N/A	#N/A	#N/A	#N/A	#N/A	#N/A	#N/A	#N/A	#N/A	#N/A	#N/A	#N/A	#N/A	#N/A	#N/A	#N/A	#N/A	#N/A	#N/A	#N/A	#N/A	#N/A	#N/A
YKL088W	205	230	190	214	196	235	136	107	108	79	112	84	176	124	172	173	178	148	71	107	157	100	140	104	141	44	264	60	168	58	194	177	179	176	279	182	192	183	188	192	198	179	225	252	227	227	203	225	130
YNL023C	#N/A	#N/A	#N/A	#N/A	#N/A	#N/A	#N/A	#N/A	#N/A	#N/A	#N/A	#N/A	#N/A	#N/A	#N/A	#N/A	#N/A	#N/A	#N/A	#N/A	#N/A	#N/A	#N/A	#N/A	#N/A	#N/A	#N/A	#N/A	#N/A	#N/A	#N/A	#N/A	#N/A	#N/A	#N/A	#N/A	#N/A	#N/A	#N/A	#N/A	#N/A	#N/A	#N/A	#N/A	#N/A	#N/A	#N/A	#N/A	#N/A
YNL135C	347	579	402	525	357	588	321	236	325	266	272	284	408	598	442	690	464	704	210	218	303	199	243	210	299	90	337	94	155	116	267	365	326	407	310	395	387	384	449	442	403	359	332	472	327	485	351	422	223
YNL265C	221	355	161	363	250	356	153	133	139	152	162	137	129	64	140	74	129	106	81	149	204	195	93	158	114	117	161	64	194	78	202	201	179	249	140	192	161	197	131	225	148	191	171	178	169	195	155	192	223
YAL012W	217	263	238	243	236	214	149	138	98	172	205	150	386	208	400	210	432	205	307	47	146	48	187	34	141	72	220	39	116	63	194	172	284	200	217	201	261	191	206	213	264	201	267	220	231	279	269	229	312
YBR213W	542	635	519	647	526	672	635	687	588	635	515	705	267	161	355	174	314	200	420	516	658	347	402	461	370	349	410	383	401	224	307	586	536	571	450	603	415	418	519	398	469	386	527	552	481	560	500	625	803
YDL017W	468	510	390	544	473	505	323	352	323	310	290	407	903	731	886	662	838	741	283	144	326	146	252	174	440	241	468	258	298	237	356	352	463	404	357	382	433	583	516	456	481	492	463	442	485	438	502	519	577
YDL211C	448	593	471	531	451	528	454	517	454	551	398	477	467	585	515	547	468	521	556	433	583	520	486	394	458	283	410	346	569	280	533	435	568	524	419	432	445	413	398	413	356	499	422	442	427	501	407	472	268
YDR182W	398	363	404	345	366	339	406	460	387	455	452	489	172	171	194	128	154	124	386	276	414	345	364	212	422	269	454	219	582	198	388	368	294	400	372	377	507	823	480	926	507	940	374	437	361	416	364	413	270
YDR211W	#N/A	#N/A	#N/A	#N/A	#N/A	#N/A	#N/A	#N/A	#N/A	#N/A	#N/A	#N/A	#N/A	#N/A	#N/A	#N/A	#N/A	#N/A	#N/A	#N/A	#N/A	#N/A	#N/A	#N/A	#N/A	#N/A	#N/A	#N/A	#N/A	#N/A	#N/A	#N/A	#N/A	#N/A	#N/A	#N/A	#N/A	#N/A	#N/A	#N/A	#N/A	#N/A	#N/A	#N/A	#N/A	#N/A	#N/A	#N/A	#N/A
YDR246W	351	309	346	338	263	401	253	318	196	281	233	293	229	238	223	242	276	224	157	199	204	196	280	178	387	258	307	292	440	242	445	545	452	595	388	551	394	590	428	526	371	587	539	784	530	771	577	758	400
YDR328C	394	442	385	431	375	486	442	513	471	505	507	546	1418	2415	1390	2405	1436	2536	551	1315	501	1402	514	1200	493	396	366	500	466	445	307	498	463	516	403	513	379	367	440	382	400	414	438	542	434	508	413	508	806
YDR504C	283	463	322	412	303	424	248	342	287	309	223	304	400	549	448	688	448	641	210	483	309	577	336	543	431	379	307	437	259	432	267	327	273	350	388	302	246	443	313	425	302	459	208	354	241	301	273	344	774
YDR524C	438	257	433	254	388	263	393	125	416	146	383	143	91	0	65	0	65	0	417	32	309	24	262	12	185	117	322	119	323	95	428	203	431	196	310	190	328	138	258	132	371	126	275	191	260	170	284	180	122
YGR135W	89	122	99	102	85	129	121	78	100	107	120	91	26	0	12	0	22	0	45	16	151	13	103	30	114	42	176	67	129	49	48	91	137	79	31	72	51	10	64	21	76	29	78	100	125	71	81	99	151
YGR161C	229	274	262	254	174	291	174	152	163	160	152	166	250	391	222	335	214	338	89	101	175	72	149	89	273	97	307	83	233	81	178	327	263	320	155	355	284	252	264	266	271	244	390	442	405	468	348	449	203
YGR213C	274	266	250	289	232	276	166	209	177	213	193	205	284	180	229	260	221	153	171	61	251	98	159	110	238	81	190	33	323	70	299	330	242	333	171	292	218	395	222	309	315	306	263	327	267	301	327	298	343
YHL039W	161	199	195	227	165	259	130	123	108	112	116	140	12	0	21	0	25	0	163	134	128	129	149	147	132	14	59	15	65	17	137	141	147	175	155	155	69	128	82	101	98	135	158	149	125	148	153	135	99
YIL117C	#N/A	#N/A	#N/A	#N/A	#N/A	#N/A	163	186	206	152	189	160	#N/A	#N/A	#N/A	#N/A	#N/A	#N/A	244	76	111	91	224	71	#N/A	#N/A	#N/A	#N/A	#N/A	#N/A	#N/A	#N/A	#N/A	#N/A	#N/A	#N/A	#N/A	#N/A	#N/A	#N/A	#N/A	#N/A	#N/A	#N/A	#N/A	#N/A	#N/A	#N/A	#N/A
YJL078C	235	234	224	217	277	280	125	92	134	127	132	108	72	50	56	48	60	44	79	86	122	45	103	102	176	107	249	104	220	98	97	146	137	158	109	140	195	193	200	196	214	273	200	215	178	167	210	211	159
YLR395C	132	127	82	139	125	140	42	46	31	40	43	61	102	120	114	111	91	100	0	41	23	49	37	36	97	99	59	93	78	77	40	80	74	86	62	142	92	111	118	157	63	139	71	66	80	82	80	92	44
YML034W	144	73	168	84	147	83	212	101	203	93	203	80	31	0	46	0	40	0	318	361	117	204	233	356	220	689	190	691	246	599	178	149	126	130	124	101	133	84	194	95	214	86	236	130	236	131	212	139	73
YMR210W	#N/A	#N/A	#N/A	#N/A	#N/A	#N/A	#N/A	#N/A	#N/A	#N/A	#N/A	#N/A	#N/A	#N/A	#N/A	#N/A	#N/A	#N/A	#N/A	#N/A	#N/A	#N/A	#N/A	#N/A	#N/A	#N/A	#N/A	#N/A	#N/A	#N/A	#N/A	#N/A	#N/A	#N/A	#N/A	#N/A	#N/A	#N/A	#N/A	#N/A	#N/A	#N/A	#N/A	#N/A	#N/A	#N/A	#N/A	#N/A	#N/A
YMR227C	267	226	291	248	259	214	263	217	222	211	243	199	98	2	96	3	94	7	176	44	227	57	299	49	264	84	351	52	220	60	275	336	263	361	388	312	412	464	471	448	396	409	347	315	369	363	322	337	234
YOR126C	267	313	267	318	223	339	316	478	335	389	365	461	865	779	750	765	872	789	181	275	268	274	299	256	194	75	293	57	311	67	283	342	294	312	326	329	284	311	331	359	271	354	205	205	205	244	195	233	213
YOR147W	250	236	238	232	232	176	259	249	232	280	249	226	62	0	46	0	36	0	252	343	210	323	290	275	264	245	249	304	427	234	162	242	137	226	264	196	236	279	288	248	173	242	273	279	252	246	288	298	174
YPL005W	#N/A	#N/A	#N/A	#N/A	#N/A	#N/A	2	7	17	6	8	10	#N/A	#N/A	#N/A	#N/A	#N/A	#N/A	#N/A	#N/A	#N/A	#N/A	#N/A	#N/A	#N/A	#N/A	#N/A	#N/A	#N/A	#N/A	#N/A	#N/A	#N/A	#N/A	#N/A	#N/A	#N/A	#N/A	#N/A	#N/A	#N/A	#N/A	7	2	9	17	6	9	78
YPL089C	280	301	269	325	339	297	251	279	282	280	245	271	224	200	242	186	198	210	486	133	181	158	308	122	202	91	264	74	168	71	178	175	315	208	155	199	218	157	225	144	211	135	218	242	258	186	219	225	359
YPR132W	62	17	63	21	76	19	359	300	335	282	375	294	36	6	49	3	47	7	213	55	291	52	308	51	53	1	29	7	129	5	40	48	32	43	93	38	61	19	33	21	66	9	24	29	31	19	40	38	55
YBL075C	151	185	192	189	232	172	68	47	79	40	77	37	262	192	301	156	310	156	0	60	52	12	75	43	317	80	190	155	104	148	170	123	168	141	140	123	182	195	149	180	211	171	110	78	127	99	109	83	65
YBR047W	489	664	481	640	437	598	616	737	653	695	669	697	448	397	474	467	566	487	423	230	588	277	551	194	440	114	366	108	414	95	574	536	557	569	434	522	504	621	522	621	525	521	531	601	568	608	516	662	533
YBR059C	#N/A	#N/A	#N/A	#N/A	#N/A	#N/A	70	33	50	28	101	18	#N/A	#N/A	#N/A	#N/A	#N/A	#N/A	0	5	82	2	19	1	#N/A	#N/A	#N/A	#N/A	#N/A	#N/A	#N/A	#N/A	#N/A	#N/A	#N/A	#N/A	#N/A	#N/A	#N/A	#N/A	#N/A	#N/A	#N/A	#N/A	#N/A	#N/A	#N/A	#N/A	#N/A
YBR131W	482	490	457	469	424	475	310	406	308	343	329	367	574	1129	565	1047	597	1104	470	1645	303	1571	355	1718	651	819	556	674	595	891	469	557	547	665	279	632	420	737	422	718	415	810	439	498	419	500	451	524	463
YBR139W	115	62	111	59	134	64	282	273	299	252	304	267	26	0	24	0	18	0	249	140	245	97	290	167	141	69	190	63	116	75	129	87	84	93	62	81	133	180	158	227	145	232	69	42	78	33	58	69	164
YBR170C	283	280	255	248	303	257	350	348	421	372	414	358	798	937	787	869	696	936	399	250	460	249	290	265	282	80	410	116	323	103	388	279	336	267	310	274	307	353	313	363	315	376	240	264	216	241	267	286	317
YBR196C-B	227	342	279	337	228	339	174	282	172	284	185	253	98	37	82	54	123	58	136	144	210	122	121	185	211	155	264	151	233	85	218	278	221	254	124	253	307	267	243	276	286	307	309	435	287	444	304	417	223
YBR227C	424	377	356	430	348	346	384	499	392	460	440	476	234	125	235	117	250	131	656	385	472	344	392	360	414	148	278	101	362	162	388	361	336	355	295	320	422	579	465	537	374	517	342	410	336	430	345	405	325
YBR238C	#N/A	#N/A	#N/A	#N/A	#N/A	#N/A	#N/A	#N/A	#N/A	#N/A	#N/A	#N/A	#N/A	#N/A	#N/A	#N/A	#N/A	#N/A	#N/A	#N/A	#N/A	#N/A	#N/A	#N/A	#N/A	#N/A	#N/A	#N/A	#N/A	#N/A	#N/A	#N/A	#N/A	#N/A	#N/A	#N/A	#N/A	#N/A	#N/A	#N/A	#N/A	#N/A	#N/A	#N/A	#N/A	#N/A	#N/A	#N/A	#N/A
YBR242W	450	556	373	569	428	622	350	432	371	404	347	421	481	604	521	536	573	550	436	380	414	320	355	462	370	364	278	508	362	271	348	383	231	428	403	401	379	575	392	553	412	615	363	520	389	506	379	459	769
YCL034W	#N/A	#N/A	#N/A	#N/A	#N/A	#N/A	#N/A	#N/A	#N/A	#N/A	#N/A	#N/A	#N/A	#N/A	#N/A	#N/A	#N/A	#N/A	#N/A	#N/A	#N/A	#N/A	#N/A	#N/A	#N/A	#N/A	#N/A	#N/A	#N/A	#N/A	#N/A	#N/A	#N/A	#N/A	#N/A	#N/A	#N/A	#N/A	#N/A	#N/A	#N/A	#N/A	#N/A	#N/A	#N/A	#N/A	#N/A	#N/A	#N/A
YDL020C	262	212	221	195	281	212	365	331	351	303	392	319	217	159	231	137	305	159	155	95	379	104	439	123	273	78	220	118	233	75	275	240	221	298	264	342	212	294	319	264	261	244	252	198	218	222	232	245	164
YDL036C	339	446	281	437	308	399	246	349	265	325	280	336	458	634	425	591	495	525	286	237	221	185	271	320	308	150	220	193	298	165	218	300	273	303	140	362	256	340	307	353	201	373	246	232	212	200	236	273	216
YDL043C	#N/A	#N/A	#N/A	#N/A	#N/A	#N/A	#N/A	#N/A	#N/A	#N/A	#N/A	#N/A	0	3	3	4	9	13	#N/A	#N/A	#N/A	#N/A	#N/A	#N/A	#N/A	#N/A	#N/A	#N/A	#N/A	#N/A	8	4	21	7	0	12	#N/A	#N/A	#N/A	#N/A	#N/A	#N/A	#N/A	#N/A	#N/A	#N/A	#N/A	#N/A	#N/A
YDL103C	#N/A	#N/A	#N/A	#N/A	#N/A	#N/A	#N/A	#N/A	#N/A	#N/A	#N/A	#N/A	#N/A	#N/A	#N/A	#N/A	#N/A	#N/A	#N/A	#N/A	#N/A	#N/A	#N/A	#N/A	#N/A	#N/A	#N/A	#N/A	#N/A	#N/A	#N/A	#N/A	#N/A	#N/A	#N/A	#N/A	#N/A	#N/A	#N/A	#N/A	#N/A	#N/A	#N/A	#N/A	#N/A	#N/A	#N/A	#N/A	#N/A
YDL127W	308	319	224	350	286	412	231	263	215	268	215	268	52	2	61	0	60	1	289	65	233	37	262	51	167	82	234	34	233	49	154	292	273	298	217	283	271	157	146	167	236	157	264	230	232	310	226	257	218
YDL135C	29	10	14	21	36	15	223	249	210	252	191	282	#N/A	#N/A	#N/A	#N/A	#N/A	#N/A	94	29	210	26	205	20	44	14	73	12	0	9	24	21	21	7	16	23	84	63	79	83	91	107	10	17	20	22	9	18	#N/A
YDL146W	56	48	46	86	22	81	244	233	230	210	233	233	#N/A	#N/A	#N/A	#N/A	#N/A	#N/A	270	168	245	145	205	146	35	26	29	24	65	19	32	93	116	103	109	80	97	120	70	142	53	135	32	37	24	38	43	32	78
YDL174C	248	280	214	269	241	282	104	108	98	78	99	87	136	108	179	109	183	135	76	23	122	41	103	24	150	67	176	33	194	66	315	214	210	233	233	220	179	162	179	175	198	141	163	156	176	183	152	175	242
YDL224C	803	946	810	835	763	980	1028	999	961	1059	980	1138	896	1486	854	1410	918	1336	1367	1790	1177	1739	1083	1873	1065	1131	1069	1244	996	1105	1026	1095	978	1031	899	996	850	793	738	778	997	814	1078	1092	1084	1114	1080	1040	1034
YDR017C	#N/A	#N/A	#N/A	#N/A	#N/A	#N/A	#N/A	#N/A	#N/A	#N/A	#N/A	#N/A	#N/A	#N/A	#N/A	#N/A	#N/A	#N/A	#N/A	#N/A	#N/A	#N/A	#N/A	#N/A	#N/A	#N/A	#N/A	#N/A	#N/A	#N/A	#N/A	#N/A	#N/A	#N/A	#N/A	#N/A	#N/A	#N/A	#N/A	#N/A	#N/A	#N/A	#N/A	#N/A	#N/A	#N/A	#N/A	#N/A	#N/A
YDR066C	379	434	373	425	303	414	316	442	294	438	302	380	622	846	542	861	742	968	386	577	297	617	215	569	343	355	264	461	285	408	242	551	294	571	372	575	307	407	231	400	343	395	282	393	352	441	288	435	486
YDR077W	420	259	464	266	401	238	444	467	421	420	420	407	589	834	676	784	564	804	438	221	309	164	308	210	396	117	483	56	440	78	339	407	305	528	326	470	594	395	540	324	576	478	438	323	427	440	460	349	270
YDR090C	562	649	503	640	495	711	346	298	363	337	369	320	682	414	741	393	713	386	92	98	431	126	402	90	466	168	366	163	362	177	445	523	473	474	450	499	476	575	522	600	396	592	422	635	452	627	402	627	346
YDR176W	389	411	435	451	406	392	251	130	253	124	266	123	286	97	351	87	279	100	63	43	268	27	262	30	510	93	527	135	621	113	509	606	568	592	558	534	491	344	571	402	532	368	173	147	185	131	146	127	434
YDR221W	212	137	183	148	178	159	204	192	237	175	172	205	181	108	214	101	198	110	268	112	181	109	121	109	264	92	220	36	246	65	291	280	284	269	357	273	271	204	273	161	311	172	103	59	107	117	109	65	125
YDR226W	420	454	361	474	357	452	321	297	296	296	321	312	391	245	334	292	366	297	472	82	175	94	290	117	370	91	234	142	311	72	348	316	357	338	403	388	292	264	316	237	230	253	374	437	349	356	362	374	187
YDR273W	#N/A	#N/A	#N/A	#N/A	#N/A	#N/A	#N/A	#N/A	#N/A	#N/A	#N/A	#N/A	#N/A	#N/A	#N/A	#N/A	#N/A	#N/A	#N/A	#N/A	#N/A	#N/A	#N/A	#N/A	#N/A	#N/A	#N/A	#N/A	#N/A	#N/A	#N/A	#N/A	#N/A	#N/A	#N/A	#N/A	#N/A	#N/A	#N/A	#N/A	#N/A	#N/A	#N/A	#N/A	#N/A	#N/A	#N/A	#N/A	#N/A
YDR275W	#N/A	#N/A	#N/A	#N/A	#N/A	#N/A	#N/A	#N/A	#N/A	#N/A	#N/A	#N/A	#N/A	#N/A	#N/A	#N/A	#N/A	#N/A	#N/A	#N/A	#N/A	#N/A	#N/A	#N/A	#N/A	#N/A	#N/A	#N/A	#N/A	#N/A	#N/A	#N/A	#N/A	#N/A	#N/A	#N/A	#N/A	#N/A	#N/A	#N/A	#N/A	#N/A	#N/A	#N/A	#N/A	#N/A	#N/A	#N/A	#N/A
YDR276C	#N/A	#N/A	#N/A	#N/A	#N/A	#N/A	#N/A	#N/A	#N/A	#N/A	#N/A	#N/A	#N/A	#N/A	#N/A	#N/A	#N/A	#N/A	#N/A	#N/A	#N/A	#N/A	#N/A	#N/A	#N/A	#N/A	#N/A	#N/A	#N/A	#N/A	#N/A	#N/A	#N/A	#N/A	#N/A	#N/A	#N/A	#N/A	#N/A	#N/A	#N/A	#N/A	#N/A	#N/A	#N/A	#N/A	#N/A	#N/A	#N/A
YDR286C	267	303	257	345	259	331	384	440	371	458	349	495	67	0	46	5	82	0	336	295	326	246	271	353	308	281	483	267	311	220	226	291	221	271	217	329	305	550	370	501	365	498	282	310	276	348	252	302	387
YDR287W	309	431	322	464	312	479	285	239	325	312	278	322	563	491	723	438	653	477	299	149	181	141	374	137	202	179	220	178	246	193	267	245	168	255	233	283	287	256	240	248	277	257	271	330	272	361	287	309	348
YDR336W	#N/A	#N/A	#N/A	#N/A	#N/A	#N/A	#N/A	#N/A	#N/A	#N/A	#N/A	#N/A	#N/A	#N/A	#N/A	#N/A	#N/A	#N/A	#N/A	#N/A	#N/A	#N/A	#N/A	#N/A	#N/A	#N/A	#N/A	#N/A	#N/A	#N/A	#N/A	#N/A	#N/A	#N/A	#N/A	#N/A	#N/A	#N/A	#N/A	#N/A	#N/A	#N/A	#N/A	#N/A	#N/A	#N/A	#N/A	#N/A	#N/A
YDR357C	127	83	144	96	80	106	204	190	220	189	193	205	105	109	99	113	89	82	265	127	175	116	168	159	150	133	176	202	207	148	170	155	137	157	186	153	138	168	143	126	192	125	144	210	123	211	143	168	130
YDR488C	127	160	125	149	134	148	172	178	179	162	168	158	31	0	30	0	27	0	391	54	210	46	196	65	176	28	88	60	104	38	137	98	105	86	124	106	123	138	149	169	138	176	117	103	105	101	144	89	226
YER039C	#N/A	#N/A	#N/A	#N/A	#N/A	#N/A	#N/A	#N/A	#N/A	#N/A	#N/A	#N/A	#N/A	#N/A	#N/A	#N/A	#N/A	#N/A	#N/A	#N/A	#N/A	#N/A	#N/A	#N/A	#N/A	#N/A	#N/A	#N/A	#N/A	#N/A	#N/A	#N/A	#N/A	#N/A	#N/A	#N/A	#N/A	#N/A	#N/A	#N/A	#N/A	#N/A	#N/A	#N/A	#N/A	#N/A	#N/A	#N/A	#N/A
YER072W	#N/A	#N/A	#N/A	#N/A	#N/A	#N/A	#N/A	#N/A	#N/A	#N/A	#N/A	#N/A	#N/A	#N/A	#N/A	#N/A	#N/A	#N/A	#N/A	#N/A	#N/A	#N/A	#N/A	#N/A	#N/A	#N/A	#N/A	#N/A	#N/A	#N/A	#N/A	#N/A	#N/A	#N/A	#N/A	#N/A	#N/A	#N/A	#N/A	#N/A	#N/A	#N/A	#N/A	#N/A	#N/A	#N/A	#N/A	#N/A	#N/A
YER109C_1	#N/A	#N/A	#N/A	#N/A	#N/A	#N/A	#N/A	#N/A	#N/A	#N/A	#N/A	#N/A	#N/A	#N/A	#N/A	#N/A	#N/A	#N/A	#N/A	#N/A	#N/A	#N/A	#N/A	#N/A	#N/A	#N/A	#N/A	#N/A	#N/A	#N/A	#N/A	#N/A	#N/A	#N/A	#N/A	#N/A	#N/A	#N/A	#N/A	#N/A	#N/A	#N/A	#N/A	#N/A	#N/A	#N/A	#N/A	#N/A	#N/A
YFL004W	259	176	289	234	277	189	200	198	268	186	239	199	48	0	71	0	67	0	205	34	227	34	318	46	414	44	381	56	285	50	339	275	357	224	326	253	294	220	322	200	283	224	379	230	403	287	353	275	249
YFL012W	209	191	224	223	223	174	140	103	112	129	132	119	1027	471	927	407	1090	494	100	3	140	3	75	9	378	230	381	238	285	244	129	194	137	153	140	158	156	235	228	204	189	227	177	151	187	184	193	187	434
YFL044C	26	35	41	28	22	40	8	8	7	5	8	10	#N/A	#N/A	#N/A	#N/A	#N/A	#N/A	#N/A	#N/A	#N/A	#N/A	#N/A	#N/A	9	17	44	11	13	29	16	24	32	13	47	10	38	84	18	70	53	79	52	83	29	82	51	56	#N/A
YGL047W	503	548	440	489	455	581	499	568	416	612	511	647	236	179	184	150	252	114	459	299	577	282	672	192	519	241	498	284	492	227	606	629	536	641	605	644	412	415	446	440	409	341	466	604	541	602	497	551	434
YGL087C	217	226	233	244	254	214	278	281	258	317	286	298	246	297	226	270	259	265	299	247	367	202	262	208	255	146	351	110	207	132	242	271	294	255	202	292	215	260	228	223	179	238	228	244	198	249	242	273	249
YGL123W	189	162	188	148	223	146	163	85	189	101	191	121	279	101	311	71	230	90	63	3	52	11	84	29	114	34	161	50	207	26	121	90	200	86	186	145	233	97	234	147	189	153	252	169	178	118	236	148	68
YGL126W	147	222	176	259	187	248	257	229	294	209	249	209	24	0	36	0	31	0	202	102	239	86	168	110	106	17	220	16	116	16	194	217	210	251	264	229	138	120	134	93	173	104	108	95	107	132	135	102	172
YGL141W	332	153	310	160	330	191	352	284	380	319	323	258	1113	1041	1118	909	1293	841	310	117	227	113	233	69	290	62	366	99	349	74	396	222	347	249	264	233	248	294	334	202	359	212	277	213	294	210	322	206	247
YGL162W	177	185	180	187	250	195	172	236	249	231	189	229	124	53	120	41	136	27	66	54	186	56	224	92	158	42	220	54	91	30	137	131	168	132	140	105	230	279	191	324	176	281	160	169	160	136	160	181	130
YGL171W	238	218	269	219	223	225	268	252	249	290	245	237	276	274	255	286	283	278	234	164	239	164	262	171	361	242	307	203	246	200	218	197	231	180	233	199	236	227	240	281	233	224	214	195	241	188	213	226	182
YGL180W	#N/A	#N/A	#N/A	#N/A	#N/A	#N/A	#N/A	#N/A	#N/A	#N/A	#N/A	#N/A	#N/A	#N/A	#N/A	#N/A	#N/A	#N/A	#N/A	#N/A	#N/A	#N/A	#N/A	#N/A	#N/A	#N/A	#N/A	#N/A	#N/A	#N/A	#N/A	#N/A	#N/A	#N/A	#N/A	#N/A	#N/A	#N/A	#N/A	#N/A	#N/A	#N/A	#N/A	#N/A	#N/A	#N/A	#N/A	#N/A	#N/A
YGL220W	#N/A	#N/A	#N/A	#N/A	#N/A	#N/A	#N/A	#N/A	#N/A	#N/A	#N/A	#N/A	#N/A	#N/A	#N/A	#N/A	#N/A	#N/A	#N/A	#N/A	#N/A	#N/A	#N/A	#N/A	#N/A	#N/A	#N/A	#N/A	#N/A	#N/A	#N/A	#N/A	#N/A	#N/A	#N/A	#N/A	#N/A	#N/A	#N/A	#N/A	#N/A	#N/A	#N/A	#N/A	#N/A	#N/A	#N/A	#N/A	#N/A
YGL227W	55	62	58	44	36	49	113	90	122	107	116	98	91	70	68	64	65	43	5	25	99	10	84	59	44	14	59	6	65	5	89	38	42	41	47	29	38	15	46	17	47	17	52	37	51	38	66	27	65
YGR196C	165	98	139	103	174	91	113	136	122	148	108	132	67	92	97	40	100	45	197	40	76	54	93	43	176	52	220	48	104	64	137	129	158	171	233	181	174	80	137	81	157	111	157	132	145	93	144	126	208
YGR240C	189	124	154	109	187	140	193	115	184	120	179	107	343	189	342	181	310	196	87	84	134	62	159	106	264	93	293	126	259	172	178	111	137	117	171	88	187	65	131	114	205	109	199	125	140	82	212	111	146
YGR248W	#N/A	#N/A	#N/A	#N/A	#N/A	#N/A	#N/A	#N/A	#N/A	#N/A	#N/A	#N/A	#N/A	#N/A	#N/A	#N/A	#N/A	#N/A	#N/A	#N/A	#N/A	#N/A	#N/A	#N/A	26	12	44	10	26	17	#N/A	#N/A	#N/A	#N/A	#N/A	#N/A	#N/A	#N/A	#N/A	#N/A	#N/A	#N/A	#N/A	#N/A	#N/A	#N/A	#N/A	#N/A	#N/A
YGR255C	324	284	325	317	361	280	378	358	390	418	369	342	474	202	535	229	548	269	433	135	239	123	374	105	378	162	307	166	272	164	404	318	273	311	403	298	346	407	334	351	428	423	401	347	385	317	407	269	143
YHL015W-A	494	554	452	546	468	592	433	504	392	530	430	489	336	298	421	285	441	298	612	459	553	455	327	455	414	233	542	231	479	237	251	341	179	370	341	343	486	638	428	586	425	618	403	494	392	473	454	482	379
YHR040W	#N/A	#N/A	#N/A	#N/A	#N/A	#N/A	#N/A	#N/A	#N/A	#N/A	#N/A	#N/A	#N/A	#N/A	#N/A	#N/A	#N/A	#N/A	#N/A	#N/A	#N/A	#N/A	#N/A	#N/A	#N/A	#N/A	#N/A	#N/A	#N/A	#N/A	#N/A	#N/A	#N/A	#N/A	#N/A	#N/A	#N/A	#N/A	#N/A	#N/A	#N/A	#N/A	#N/A	#N/A	#N/A	#N/A	#N/A	#N/A	#N/A
YHR046C	276	307	303	331	343	325	270	294	323	279	321	334	215	166	196	179	236	143	669	280	384	271	205	271	246	101	351	131	285	88	356	314	200	288	295	319	353	403	370	347	286	369	294	369	265	378	282	296	213
YHR084W	300	139	308	137	268	163	238	103	225	104	266	84	319	233	377	273	312	252	163	80	169	93	140	125	211	34	176	50	285	50	234	212	431	175	295	140	228	69	216	62	267	82	299	203	301	178	327	204	177
YHR086W	#N/A	#N/A	#N/A	#N/A	#N/A	#N/A	#N/A	#N/A	#N/A	#N/A	#N/A	#N/A	#N/A	#N/A	#N/A	#N/A	#N/A	#N/A	#N/A	#N/A	#N/A	#N/A	#N/A	#N/A	#N/A	#N/A	#N/A	#N/A	#N/A	#N/A	#N/A	#N/A	#N/A	#N/A	#N/A	#N/A	#N/A	#N/A	#N/A	#N/A	#N/A	#N/A	#N/A	#N/A	#N/A	#N/A	#N/A	#N/A	#N/A
YHR146W	#N/A	#N/A	#N/A	#N/A	#N/A	#N/A	#N/A	#N/A	#N/A	#N/A	#N/A	#N/A	#N/A	#N/A	#N/A	#N/A	#N/A	#N/A	#N/A	#N/A	#N/A	#N/A	#N/A	#N/A	#N/A	#N/A	#N/A	#N/A	#N/A	#N/A	#N/A	#N/A	#N/A	#N/A	#N/A	#N/A	#N/A	#N/A	#N/A	#N/A	#N/A	#N/A	#N/A	#N/A	#N/A	#N/A	#N/A	#N/A	#N/A
YIL026C	158	54	152	81	183	66	170	80	146	98	132	96	52	0	49	0	45	0	236	80	134	79	103	60	79	39	161	53	129	56	137	102	158	90	217	87	166	34	134	33	164	61	188	71	185	76	184	95	195
YIL033C	#N/A	#N/A	#N/A	#N/A	#N/A	#N/A	#N/A	#N/A	#N/A	#N/A	#N/A	#N/A	#N/A	#N/A	#N/A	#N/A	#N/A	#N/A	#N/A	#N/A	#N/A	#N/A	#N/A	#N/A	#N/A	#N/A	#N/A	#N/A	#N/A	#N/A	#N/A	#N/A	#N/A	#N/A	#N/A	#N/A	#N/A	#N/A	#N/A	#N/A	#N/A	#N/A	#N/A	#N/A	#N/A	#N/A	#N/A	#N/A	#N/A
YIL071C	30	41	31	44	27	64	42	39	48	43	34	49	#N/A	#N/A	#N/A	#N/A	#N/A	#N/A	18	35	35	23	37	48	#N/A	#N/A	#N/A	#N/A	#N/A	#N/A	48	26	53	18	0	34	#N/A	#N/A	#N/A	#N/A	#N/A	#N/A	20	27	42	36	37	49	#N/A
YIL101C	112	153	125	104	129	148	159	99	143	143	174	146	19	0	27	0	31	0	189	374	93	309	65	496	150	367	102	457	129	450	81	175	105	140	109	244	210	118	140	122	135	142	98	83	96	71	112	115	60
YIL139C	#N/A	#N/A	#N/A	#N/A	#N/A	#N/A	#N/A	#N/A	#N/A	#N/A	#N/A	#N/A	#N/A	#N/A	#N/A	#N/A	#N/A	#N/A	#N/A	#N/A	#N/A	#N/A	#N/A	#N/A	#N/A	#N/A	#N/A	#N/A	#N/A	#N/A	#N/A	#N/A	#N/A	#N/A	#N/A	#N/A	#N/A	#N/A	#N/A	#N/A	#N/A	#N/A	#N/A	#N/A	#N/A	#N/A	#N/A	#N/A	#N/A
YIR038C	394	434	378	400	348	403	403	463	478	401	379	401	346	351	334	370	368	343	228	298	414	258	411	335	370	164	307	81	259	118	348	446	410	482	403	434	381	476	428	456	374	431	392	413	345	448	388	417	761
YJL006C	592	504	616	544	562	556	773	661	777	684	692	644	655	487	673	496	774	475	753	416	635	238	841	233	563	137	849	189	660	201	671	654	768	760	527	666	545	533	604	592	585	567	618	731	637	712	589	735	528
YJL012C	#N/A	#N/A	#N/A	#N/A	#N/A	#N/A	#N/A	#N/A	#N/A	#N/A	#N/A	#N/A	#N/A	#N/A	#N/A	#N/A	#N/A	#N/A	#N/A	#N/A	#N/A	#N/A	#N/A	#N/A	#N/A	#N/A	#N/A	#N/A	#N/A	#N/A	#N/A	#N/A	#N/A	#N/A	#N/A	#N/A	#N/A	#N/A	#N/A	#N/A	#N/A	#N/A	#N/A	#N/A	#N/A	#N/A	#N/A	#N/A	#N/A
YJL026W	59	2	82	1	67	2	276	119	301	114	331	109	67	3	82	0	62	1	241	10	303	5	336	18	114	1	88	0	116	7	89	31	42	21	47	13	105	48	85	70	110	42	86	12	91	24	84	12	78
YJL027C	111	124	149	110	112	117	140	173	170	171	142	206	98	76	111	102	114	102	194	341	245	292	280	337	123	63	190	81	104	52	137	116	74	150	295	135	166	206	161	264	205	201	164	130	167	164	184	137	244
YJL097W	#N/A	#N/A	#N/A	#N/A	#N/A	#N/A	#N/A	#N/A	#N/A	#N/A	#N/A	#N/A	#N/A	#N/A	#N/A	#N/A	#N/A	#N/A	#N/A	#N/A	#N/A	#N/A	#N/A	#N/A	#N/A	#N/A	#N/A	#N/A	#N/A	#N/A	#N/A	#N/A	#N/A	#N/A	#N/A	#N/A	#N/A	#N/A	#N/A	#N/A	#N/A	#N/A	#N/A	#N/A	#N/A	#N/A	#N/A	#N/A	#N/A
YJL153C	39	66	38	70	22	72	21	29	14	22	16	26	#N/A	#N/A	#N/A	#N/A	#N/A	#N/A	24	10	17	11	28	23	53	17	29	5	13	8	8	18	42	16	16	22	44	42	15	41	38	30	29	22	34	22	34	16	16
YJL192C	179	50	132	48	112	47	306	247	328	288	365	274	57	0	59	0	40	0	402	140	344	119	355	137	211	101	249	85	168	91	170	146	168	112	248	145	177	159	234	173	252	192	186	71	178	61	155	80	62
YJR010C-A	#N/A	#N/A	#N/A	#N/A	#N/A	#N/A	#N/A	#N/A	#N/A	#N/A	#N/A	#N/A	#N/A	#N/A	#N/A	#N/A	#N/A	#N/A	#N/A	#N/A	#N/A	#N/A	#N/A	#N/A	#N/A	#N/A	#N/A	#N/A	#N/A	#N/A	#N/A	#N/A	#N/A	#N/A	#N/A	#N/A	#N/A	#N/A	#N/A	#N/A	#N/A	#N/A	#N/A	#N/A	#N/A	#N/A	#N/A	#N/A	#N/A
YJR013W	221	187	183	211	156	216	134	92	122	94	124	82	33	0	33	0	22	0	92	52	87	49	112	33	194	121	176	95	259	65	121	229	221	184	217	192	118	193	164	179	160	133	226	247	202	246	180	222	156
YJR014W	#N/A	#N/A	#N/A	#N/A	#N/A	#N/A	#N/A	#N/A	#N/A	#N/A	#N/A	#N/A	#N/A	#N/A	#N/A	#N/A	#N/A	#N/A	#N/A	#N/A	#N/A	#N/A	#N/A	#N/A	#N/A	#N/A	#N/A	#N/A	#N/A	#N/A	#N/A	#N/A	#N/A	#N/A	#N/A	#N/A	#N/A	#N/A	#N/A	#N/A	#N/A	#N/A	#N/A	#N/A	#N/A	#N/A	#N/A	#N/A	#N/A
YJR024C	106	83	89	85	103	91	132	135	151	122	146	145	312	371	286	472	294	330	97	148	146	98	112	76	158	64	73	71	168	92	113	217	189	199	186	225	161	143	103	132	195	161	149	222	191	175	143	211	86
YJR035W	#N/A	#N/A	#N/A	#N/A	#N/A	#N/A	#N/A	#N/A	#N/A	#N/A	#N/A	#N/A	#N/A	#N/A	#N/A	#N/A	#N/A	#N/A	#N/A	#N/A	#N/A	#N/A	#N/A	#N/A	#N/A	#N/A	#N/A	#N/A	#N/A	#N/A	#N/A	#N/A	#N/A	#N/A	#N/A	#N/A	#N/A	#N/A	#N/A	#N/A	#N/A	#N/A	#N/A	#N/A	#N/A	#N/A	#N/A	#N/A	#N/A
YJR075W	259	236	267	269	335	297	263	234	201	251	252	239	303	175	270	194	279	205	205	281	227	233	233	218	273	70	307	69	311	79	315	285	326	295	279	293	282	212	401	229	318	245	318	320	318	315	302	344	218
YJR125C	91	33	94	41	71	51	335	435	395	341	369	374	763	421	719	490	740	463	604	280	431	274	411	291	158	43	190	69	181	41	162	257	168	205	140	205	195	285	152	260	208	259	160	178	145	181	149	123	114
YKL041W	341	458	378	504	442	526	454	424	368	428	412	434	269	203	314	284	310	255	373	364	431	433	439	445	229	240	293	210	440	193	364	441	410	490	279	476	307	262	301	266	315	208	323	364	261	333	279	352	304
YKL152C	#N/A	#N/A	#N/A	#N/A	#N/A	#N/A	#N/A	#N/A	#N/A	#N/A	#N/A	#N/A	#N/A	#N/A	#N/A	#N/A	#N/A	#N/A	#N/A	#N/A	#N/A	#N/A	#N/A	#N/A	#N/A	#N/A	#N/A	#N/A	#N/A	#N/A	#N/A	#N/A	#N/A	#N/A	#N/A	#N/A	#N/A	#N/A	#N/A	#N/A	#N/A	#N/A	#N/A	#N/A	#N/A	#N/A	#N/A	#N/A	#N/A
YKL210W	#N/A	#N/A	#N/A	#N/A	#N/A	#N/A	#N/A	#N/A	#N/A	#N/A	#N/A	#N/A	#N/A	#N/A	#N/A	#N/A	#N/A	#N/A	#N/A	#N/A	#N/A	#N/A	#N/A	#N/A	#N/A	#N/A	#N/A	#N/A	#N/A	#N/A	#N/A	#N/A	#N/A	#N/A	#N/A	#N/A	#N/A	#N/A	#N/A	#N/A	#N/A	#N/A	#N/A	#N/A	#N/A	#N/A	#N/A	#N/A	#N/A
YKL221W	271	232	277	257	299	278	308	327	263	238	288	309	369	259	276	246	270	250	320	475	367	435	224	352	326	154	410	145	362	168	291	291	221	316	279	282	259	315	225	248	252	235	289	323	276	342	295	356	359
YKR001C	55	73	87	60	80	68	149	147	127	120	124	118	#N/A	#N/A	#N/A	#N/A	#N/A	#N/A	113	46	134	57	121	51	35	16	29	4	13	9	8	30	32	32	16	37	31	40	43	17	31	12	38	37	31	19	26	41	#N/A
YKR101W	98	42	82	45	94	28	149	138	143	120	114	98	98	112	85	68	80	58	92	30	93	24	103	9	211	333	220	348	259	321	137	125	63	129	140	103	182	208	185	279	167	222	165	120	149	125	147	123	65
YLL029W	224	158	212	188	143	231	187	157	172	158	197	160	88	75	132	76	134	61	105	91	140	67	177	57	97	58	190	32	142	57	162	136	126	191	140	156	195	134	158	132	189	146	172	122	178	145	166	142	260
YLL038C	139	160	120	158	120	208	76	107	93	140	73	111	33	0	41	0	36	0	163	77	70	63	140	88	132	85	88	87	142	117	105	113	105	71	16	99	151	222	155	179	151	222	148	112	171	137	120	149	62
YLR061W	#N/A	#N/A	#N/A	#N/A	#N/A	#N/A	#N/A	#N/A	#N/A	#N/A	#N/A	#N/A	#N/A	#N/A	#N/A	#N/A	#N/A	#N/A	#N/A	#N/A	#N/A	#N/A	#N/A	#N/A	#N/A	#N/A	#N/A	#N/A	#N/A	#N/A	#N/A	#N/A	#N/A	#N/A	#N/A	#N/A	#N/A	#N/A	#N/A	#N/A	#N/A	#N/A	#N/A	#N/A	#N/A	#N/A	#N/A	#N/A	#N/A
YLR073C	217	241	226	218	254	219	127	56	81	54	118	47	717	471	640	415	724	449	160	30	82	22	75	45	299	188	293	212	311	156	202	249	158	201	295	213	343	409	337	516	302	503	333	261	301	277	350	263	483
YLR092W	#N/A	#N/A	#N/A	#N/A	#N/A	#N/A	#N/A	#N/A	#N/A	#N/A	#N/A	#N/A	#N/A	#N/A	#N/A	#N/A	#N/A	#N/A	#N/A	#N/A	#N/A	#N/A	#N/A	#N/A	#N/A	#N/A	#N/A	#N/A	#N/A	#N/A	#N/A	#N/A	#N/A	#N/A	#N/A	#N/A	#N/A	#N/A	#N/A	#N/A	#N/A	#N/A	#N/A	#N/A	#N/A	#N/A	#N/A	#N/A	#N/A
YLR179C	74	52	63	51	85	49	119	77	139	65	103	91	124	136	132	137	129	148	115	76	93	41	131	90	70	30	59	26	52	36	48	69	84	104	62	87	56	42	79	83	76	67	120	151	147	128	110	126	49
YLR324W	356	525	320	466	343	424	304	334	282	334	274	308	305	325	316	330	288	303	304	250	280	249	252	267	229	145	264	135	272	144	251	235	210	233	171	219	253	195	173	194	245	150	333	376	310	325	330	351	226
YLR364W	314	328	279	332	361	392	147	180	143	185	160	172	396	340	436	382	426	358	157	57	122	60	121	33	387	392	498	428	336	359	267	475	389	479	279	444	330	571	334	553	337	566	407	447	394	411	379	422	260
YLR437C	#N/A	#N/A	#N/A	#N/A	#N/A	#N/A	#N/A	#N/A	#N/A	#N/A	#N/A	#N/A	#N/A	#N/A	#N/A	#N/A	#N/A	#N/A	#N/A	#N/A	#N/A	#N/A	#N/A	#N/A	#N/A	#N/A	#N/A	#N/A	#N/A	#N/A	#N/A	#N/A	#N/A	#N/A	#N/A	#N/A	#N/A	#N/A	#N/A	#N/A	#N/A	#N/A	#N/A	#N/A	#N/A	#N/A	#N/A	#N/A	#N/A
YLR449W	23	19	22	15	18	15	257	266	249	315	284	259	#N/A	#N/A	#N/A	#N/A	#N/A	#N/A	318	112	245	90	271	133	#N/A	#N/A	#N/A	#N/A	#N/A	#N/A	32	60	74	54	93	48	44	61	46	80	63	64	12	20	9	24	11	19	68
YML054C	48	60	38	51	49	55	151	145	158	152	154	143	157	89	160	94	152	107	108	92	146	67	168	46	18	1	59	4	52	9	57	31	63	36	0	27	38	4	27	19	22	9	26	17	18	8	14	8	16
YML056C	230	185	240	158	272	153	212	186	198	179	233	197	219	95	275	87	210	88	157	16	134	24	140	25	211	150	337	97	285	132	283	240	221	171	155	241	310	382	304	314	261	311	339	259	367	271	367	313	148
YMR005W	68	75	70	74	80	72	242	236	249	254	280	227	12	0	14	0	31	0	265	174	297	237	364	149	97	40	176	34	116	36	89	70	32	58	78	72	102	42	76	45	66	32	58	64	53	33	89	47	36
YMR032W	147	143	132	157	129	187	83	50	69	63	69	78	26	1	17	0	18	0	29	76	111	63	75	29	158	70	205	69	246	77	65	59	95	70	47	55	151	243	219	227	170	259	187	154	171	147	153	158	60
YMR043W	#N/A	#N/A	#N/A	#N/A	#N/A	#N/A	#N/A	#N/A	#N/A	#N/A	#N/A	#N/A	#N/A	#N/A	#N/A	#N/A	#N/A	#N/A	#N/A	#N/A	#N/A	#N/A	#N/A	#N/A	#N/A	#N/A	#N/A	#N/A	#N/A	#N/A	#N/A	#N/A	#N/A	#N/A	#N/A	#N/A	#N/A	#N/A	#N/A	#N/A	#N/A	#N/A	#N/A	#N/A	#N/A	#N/A	#N/A	#N/A	#N/A
YMR196W	239	126	192	119	232	127	174	156	237	161	197	149	74	31	77	24	85	27	134	28	117	23	168	53	255	123	307	114	285	109	113	175	189	169	171	160	164	82	261	114	186	90	222	161	249	162	218	160	164
YMR233W	170	143	180	170	223	170	321	664	313	598	349	592	253	227	201	238	223	193	349	230	350	220	308	207	229	86	205	119	246	105	129	222	189	208	186	190	166	155	82	122	160	133	111	120	96	118	143	110	70
YMR281W	#N/A	#N/A	#N/A	#N/A	#N/A	#N/A	#N/A	#N/A	#N/A	#N/A	#N/A	#N/A	#N/A	#N/A	#N/A	#N/A	#N/A	#N/A	#N/A	#N/A	#N/A	#N/A	#N/A	#N/A	#N/A	#N/A	#N/A	#N/A	#N/A	#N/A	#N/A	#N/A	#N/A	#N/A	#N/A	#N/A	#N/A	#N/A	#N/A	#N/A	#N/A	#N/A	#N/A	#N/A	#N/A	#N/A	#N/A	#N/A	#N/A
YMR288W	#N/A	#N/A	#N/A	#N/A	#N/A	#N/A	#N/A	#N/A	#N/A	#N/A	#N/A	#N/A	#N/A	#N/A	#N/A	#N/A	#N/A	#N/A	#N/A	#N/A	#N/A	#N/A	#N/A	#N/A	#N/A	#N/A	#N/A	#N/A	#N/A	#N/A	#N/A	#N/A	#N/A	#N/A	#N/A	#N/A	#N/A	#N/A	#N/A	#N/A	#N/A	#N/A	#N/A	#N/A	#N/A	#N/A	#N/A	#N/A	#N/A
YNL024C	124	79	161	60	120	78	257	318	304	333	333	287	555	478	503	376	582	419	357	51	303	75	290	91	114	40	88	59	181	40	129	181	179	180	109	169	241	191	158	208	151	185	90	78	122	79	95	95	187
YNL024C-A	#N/A	#N/A	#N/A	#N/A	#N/A	#N/A	#N/A	#N/A	#N/A	#N/A	#N/A	#N/A	#N/A	#N/A	#N/A	#N/A	#N/A	#N/A	#N/A	#N/A	#N/A	#N/A	#N/A	#N/A	#N/A	#N/A	#N/A	#N/A	#N/A	#N/A	#N/A	#N/A	#N/A	#N/A	#N/A	#N/A	#N/A	#N/A	#N/A	#N/A	#N/A	#N/A	#N/A	#N/A	#N/A	#N/A	#N/A	#N/A	#N/A
YNL067W	479	195	354	178	406	172	76	30	67	21	53	30	362	99	308	99	390	80	66	5	35	1	19	0	317	153	322	165	259	145	339	258	421	232	357	240	443	445	468	396	463	365	472	222	468	229	468	204	216
YNL075W	#N/A	#N/A	#N/A	#N/A	#N/A	#N/A	#N/A	#N/A	#N/A	#N/A	#N/A	#N/A	#N/A	#N/A	#N/A	#N/A	#N/A	#N/A	#N/A	#N/A	#N/A	#N/A	#N/A	#N/A	#N/A	#N/A	#N/A	#N/A	#N/A	#N/A	#N/A	#N/A	#N/A	#N/A	#N/A	#N/A	#N/A	#N/A	#N/A	#N/A	#N/A	#N/A	#N/A	#N/A	#N/A	#N/A	#N/A	#N/A	#N/A
YNL149C	206	355	204	305	152	305	81	74	53	100	53	87	234	274	255	301	250	331	37	92	87	95	75	116	150	62	132	83	116	62	178	245	137	225	202	214	159	136	112	153	135	170	187	171	209	257	186	252	120
YNL187W	27	54	22	66	18	53	#N/A	#N/A	#N/A	#N/A	#N/A	#N/A	#N/A	#N/A	#N/A	#N/A	#N/A	#N/A	#N/A	#N/A	#N/A	#N/A	#N/A	#N/A	#N/A	#N/A	#N/A	#N/A	#N/A	#N/A	#N/A	#N/A	#N/A	#N/A	#N/A	#N/A	#N/A	#N/A	#N/A	#N/A	#N/A	#N/A	#N/A	#N/A	#N/A	#N/A	#N/A	#N/A	#N/A
YNR015W	168	182	195	209	152	193	110	112	120	132	116	106	391	263	374	367	359	331	291	35	134	19	75	55	238	109	264	128	207	112	178	168	179	203	171	162	133	88	146	91	176	89	222	181	238	260	219	217	187
YNR036C	273	257	327	272	259	276	420	362	371	371	381	374	200	119	223	108	178	96	189	155	431	186	374	85	370	89	234	104	336	103	315	352	357	362	233	377	343	336	316	400	302	347	375	391	363	467	354	372	366
YNR074C	420	473	358	481	401	397	457	455	459	456	391	550	296	242	317	224	285	244	394	351	408	289	374	331	246	194	234	217	311	239	218	368	221	305	248	381	333	258	355	334	230	351	239	261	218	252	203	259	185
YOL049W	433	382	455	399	348	407	403	571	445	537	495	596	219	110	214	123	230	71	320	161	460	118	383	147	475	222	571	350	401	191	420	327	368	309	403	305	479	325	407	299	381	291	448	498	483	522	425	443	198
YOL061W	#N/A	#N/A	#N/A	#N/A	#N/A	#N/A	#N/A	#N/A	#N/A	#N/A	#N/A	#N/A	#N/A	#N/A	#N/A	#N/A	#N/A	#N/A	#N/A	#N/A	#N/A	#N/A	#N/A	#N/A	#N/A	#N/A	#N/A	#N/A	#N/A	#N/A	#N/A	#N/A	#N/A	#N/A	#N/A	#N/A	#N/A	#N/A	#N/A	#N/A	#N/A	#N/A	#N/A	#N/A	#N/A	#N/A	#N/A	#N/A	#N/A
YOL147C	254	209	250	221	210	242	263	318	234	331	268	331	262	190	229	152	250	145	231	168	192	208	327	216	211	46	190	50	246	78	226	251	294	271	217	249	307	246	225	241	201	195	260	313	251	320	276	328	169
YOR092W	#N/A	#N/A	#N/A	#N/A	#N/A	#N/A	#N/A	#N/A	#N/A	#N/A	#N/A	#N/A	#N/A	#N/A	#N/A	#N/A	#N/A	#N/A	#N/A	#N/A	#N/A	#N/A	#N/A	#N/A	#N/A	#N/A	#N/A	#N/A	#N/A	#N/A	#N/A	#N/A	#N/A	#N/A	#N/A	#N/A	#N/A	#N/A	#N/A	#N/A	#N/A	#N/A	#N/A	#N/A	#N/A	#N/A	#N/A	#N/A	#N/A
YOR241W	453	404	457	375	384	342	251	207	213	220	217	253	565	268	474	284	568	221	144	94	227	61	196	74	334	181	366	158	479	187	428	444	389	513	372	460	573	713	534	766	676	718	529	415	512	430	528	477	392
YOR258W	47	29	41	26	31	32	11	15	7	22	14	15	5	0	20	0	11	0	#N/A	#N/A	#N/A	#N/A	#N/A	#N/A	176	8280	205	7774	155	7450	57	99	84	68	62	90	74	71	88	41	38	58	36	44	36	49	55	60	29
YOR347C	294	317	320	313	241	305	287	360	289	307	276	323	160	63	126	83	123	80	220	93	192	75	177	68	290	121	278	136	233	103	323	341	252	373	481	349	323	346	298	361	283	292	319	391	283	342	327	355	161
YOR360C	251	174	337	170	312	180	367	97	318	76	343	96	119	15	164	35	134	39	178	34	332	9	383	17	334	6	307	6	168	4	267	234	357	287	264	289	374	6	258	8	340	3	502	208	485	218	440	206	195
YPL045W	329	377	378	355	477	348	333	307	325	287	335	318	632	604	757	630	774	636	241	166	274	148	411	153	334	77	220	63	220	55	396	265	336	313	434	270	394	457	367	382	371	410	284	281	281	315	305	306	346
YPL051W	262	286	209	317	170	318	221	272	256	320	290	293	33	0	50	0	31	0	218	201	326	172	243	171	194	122	190	126	220	152	339	235	305	278	186	271	246	342	282	363	205	313	206	217	203	236	212	219	405
YPL079W	462	585	556	528	437	541	276	238	253	212	233	192	365	359	322	333	221	305	181	33	251	26	271	56	343	52	293	23	298	41	533	541	589	577	558	534	392	246	413	248	400	195	547	525	530	500	568	566	239
YPL088W	364	396	385	371	361	448	465	499	435	485	452	427	644	530	570	526	644	594	399	270	495	308	318	376	317	198	527	232	388	157	315	304	389	284	310	291	433	625	377	572	434	524	365	415	336	378	371	417	777
YPL090C	#N/A	#N/A	#N/A	#N/A	#N/A	#N/A	#N/A	#N/A	#N/A	#N/A	#N/A	#N/A	#N/A	#N/A	#N/A	#N/A	#N/A	#N/A	#N/A	#N/A	#N/A	#N/A	#N/A	#N/A	#N/A	#N/A	#N/A	#N/A	#N/A	#N/A	#N/A	#N/A	#N/A	#N/A	#N/A	#N/A	#N/A	#N/A	#N/A	#N/A	#N/A	#N/A	#N/A	#N/A	#N/A	#N/A	#N/A	#N/A	#N/A
YPL113C	#N/A	#N/A	#N/A	#N/A	#N/A	#N/A	#N/A	#N/A	#N/A	#N/A	#N/A	#N/A	#N/A	#N/A	#N/A	#N/A	#N/A	#N/A	#N/A	#N/A	#N/A	#N/A	#N/A	#N/A	#N/A	#N/A	#N/A	#N/A	#N/A	#N/A	#N/A	#N/A	#N/A	#N/A	#N/A	#N/A	#N/A	#N/A	#N/A	#N/A	#N/A	#N/A	#N/A	#N/A	#N/A	#N/A	#N/A	#N/A	#N/A
YPL157W	273	207	286	241	228	214	257	273	244	276	278	276	310	249	349	282	294	260	231	179	285	202	215	144	299	172	264	113	246	128	210	184	231	205	155	212	302	325	258	316	286	385	282	367	312	364	302	336	247
YPL160W	262	141	274	185	272	189	289	229	294	186	268	188	164	104	208	106	152	111	194	110	256	61	215	70	185	38	205	50	220	45	348	250	263	273	279	227	289	166	264	161	230	155	317	232	338	260	354	252	205
YPL245W	201	210	204	162	178	206	170	164	198	181	211	147	57	24	77	26	67	27	113	37	221	15	215	34	246	148	102	127	259	109	170	217	147	203	109	212	205	290	228	227	249	242	215	203	267	258	249	238	291
YPL250C	142	228	118	204	174	214	251	241	244	263	252	274	74	18	44	18	56	25	234	79	192	58	243	75	88	66	88	40	13	44	186	189	95	195	109	240	92	46	79	43	88	64	112	108	114	87	104	77	60
YPR002W	#N/A	#N/A	#N/A	#N/A	#N/A	#N/A	#N/A	#N/A	#N/A	#N/A	#N/A	#N/A	#N/A	#N/A	#N/A	#N/A	#N/A	#N/A	#N/A	#N/A	#N/A	#N/A	#N/A	#N/A	#N/A	#N/A	#N/A	#N/A	#N/A	#N/A	#N/A	#N/A	#N/A	#N/A	#N/A	#N/A	#N/A	#N/A	#N/A	#N/A	#N/A	#N/A	#N/A	#N/A	#N/A	#N/A	#N/A	#N/A	#N/A
YPR062W	#N/A	#N/A	#N/A	#N/A	#N/A	#N/A	#N/A	#N/A	#N/A	#N/A	#N/A	#N/A	#N/A	#N/A	#N/A	#N/A	#N/A	#N/A	#N/A	#N/A	#N/A	#N/A	#N/A	#N/A	#N/A	#N/A	#N/A	#N/A	#N/A	#N/A	#N/A	#N/A	#N/A	#N/A	#N/A	#N/A	#N/A	#N/A	#N/A	#N/A	#N/A	#N/A	#N/A	#N/A	#N/A	#N/A	#N/A	#N/A	#N/A
YPR163C	323	380	334	436	352	397	240	188	299	188	243	238	131	30	109	23	138	50	241	49	198	45	131	56	255	48	146	58	168	57	218	222	189	162	186	216	228	197	243	217	208	216	247	183	202	211	262	229	257
YAL013W	406	458	387	417	348	369	399	334	356	336	318	373	262	153	246	171	272	193	344	263	367	325	336	239	502	302	468	302	505	322	574	489	547	565	434	451	417	663	553	691	475	596	416	520	436	523	486	504	255
YAL019W	201	145	204	137	187	159	193	180	203	202	213	179	186	83	141	88	163	99	192	62	111	67	233	52	176	50	117	32	194	62	202	252	357	249	124	225	264	180	243	206	271	216	231	142	169	132	216	146	281
YAL025C	#N/A	#N/A	#N/A	#N/A	#N/A	#N/A	#N/A	#N/A	#N/A	#N/A	#N/A	#N/A	#N/A	#N/A	#N/A	#N/A	#N/A	#N/A	#N/A	#N/A	#N/A	#N/A	#N/A	#N/A	#N/A	#N/A	#N/A	#N/A	#N/A	#N/A	#N/A	#N/A	#N/A	#N/A	#N/A	#N/A	#N/A	#N/A	#N/A	#N/A	#N/A	#N/A	#N/A	#N/A	#N/A	#N/A	#N/A	#N/A	#N/A
YAL027W	142	154	161	190	138	199	85	125	84	104	126	127	26	0	21	0	27	0	87	9	58	10	65	29	88	48	132	74	142	59	129	192	137	155	124	182	105	61	52	101	88	82	98	130	93	93	97	100	86
YAL039C	151	73	147	66	152	87	227	311	282	354	262	354	291	235	289	214	283	244	323	339	361	304	318	221	308	276	322	279	220	246	186	306	179	284	310	292	189	143	200	116	167	133	232	269	232	268	210	295	252
YAL040C	100	35	89	30	116	32	214	172	225	226	237	191	19	0	29	0	18	0	178	142	227	190	112	154	62	19	29	18	91	20	145	46	252	61	202	36	95	38	79	41	66	25	61	61	53	57	61	49	130
YAL047C	#N/A	#N/A	#N/A	#N/A	#N/A	#N/A	#N/A	#N/A	#N/A	#N/A	#N/A	#N/A	#N/A	#N/A	#N/A	#N/A	#N/A	#N/A	#N/A	#N/A	#N/A	#N/A	#N/A	#N/A	#N/A	#N/A	#N/A	#N/A	#N/A	#N/A	#N/A	#N/A	#N/A	#N/A	#N/A	#N/A	#N/A	#N/A	#N/A	#N/A	#N/A	#N/A	#N/A	#N/A	#N/A	#N/A	#N/A	#N/A	#N/A
YAL053W	#N/A	#N/A	#N/A	#N/A	#N/A	#N/A	87	98	141	64	122	90	#N/A	#N/A	#N/A	#N/A	#N/A	#N/A	52	36	99	20	112	20	#N/A	#N/A	#N/A	#N/A	#N/A	#N/A	24	16	0	20	16	8	61	63	52	54	50	65	16	10	31	9	21	5	#N/A
YAL058W	#N/A	#N/A	#N/A	#N/A	#N/A	#N/A	#N/A	#N/A	#N/A	#N/A	#N/A	#N/A	#N/A	#N/A	#N/A	#N/A	#N/A	#N/A	#N/A	#N/A	#N/A	#N/A	#N/A	#N/A	#N/A	#N/A	#N/A	#N/A	#N/A	#N/A	#N/A	#N/A	#N/A	#N/A	#N/A	#N/A	#N/A	#N/A	#N/A	#N/A	#N/A	#N/A	#N/A	#N/A	#N/A	#N/A	#N/A	#N/A	#N/A
YAR002C-A	56	91	75	58	45	59	189	236	213	234	221	274	#N/A	#N/A	#N/A	#N/A	#N/A	#N/A	186	167	274	147	252	155	9	12	29	14	39	11	57	80	74	100	31	73	56	90	67	76	41	86	49	59	34	44	29	38	31
YBL016W	329	346	349	336	303	329	299	355	344	343	325	312	598	544	635	542	653	611	299	188	396	254	411	269	484	282	307	196	479	269	485	426	305	421	326	405	320	470	301	444	371	408	303	347	283	449	269	416	416
YBL027W	159	87	166	120	156	87	59	97	84	100	81	112	38	0	32	0	20	0	79	19	64	28	112	8	97	10	146	18	129	1	331	197	221	199	233	156	166	172	191	186	230	195	353	345	334	347	347	375	372
YBL033C	26	58	19	68	27	55	83	111	74	105	63	73	#N/A	#N/A	#N/A	#N/A	#N/A	#N/A	220	396	192	432	84	335	9	47	0	64	52	36	16	9	11	4	0	7	#N/A	#N/A	#N/A	#N/A	#N/A	#N/A	53	46	44	50	44	53	65
YBL080C	55	58	51	48	54	51	74	60	67	41	67	57	12	0	17	0	13	0	18	13	82	20	56	0	35	23	88	40	52	27	73	54	63	63	124	61	59	84	70	62	76	75	57	49	40	57	48	39	81
YBL095W	#N/A	#N/A	#N/A	#N/A	#N/A	#N/A	#N/A	#N/A	#N/A	#N/A	#N/A	#N/A	#N/A	#N/A	#N/A	#N/A	#N/A	#N/A	#N/A	#N/A	#N/A	#N/A	#N/A	#N/A	#N/A	#N/A	#N/A	#N/A	#N/A	#N/A	#N/A	#N/A	#N/A	#N/A	#N/A	#N/A	#N/A	#N/A	#N/A	#N/A	#N/A	#N/A	#N/A	#N/A	#N/A	#N/A	#N/A	#N/A	#N/A
YBR005W	86	29	60	35	94	25	319	370	347	397	383	438	181	201	252	284	234	283	365	250	297	268	364	226	106	51	88	65	129	54	105	87	95	124	155	110	51	36	55	60	63	57	50	34	44	46	52	34	213
YBR006W	#N/A	#N/A	#N/A	#N/A	#N/A	#N/A	#N/A	#N/A	#N/A	#N/A	#N/A	#N/A	#N/A	#N/A	#N/A	#N/A	#N/A	#N/A	#N/A	#N/A	#N/A	#N/A	#N/A	#N/A	#N/A	#N/A	#N/A	#N/A	#N/A	#N/A	#N/A	#N/A	#N/A	#N/A	#N/A	#N/A	#N/A	#N/A	#N/A	#N/A	#N/A	#N/A	#N/A	#N/A	#N/A	#N/A	#N/A	#N/A	#N/A
YBR010W	261	85	289	58	268	89	457	279	454	269	426	287	164	73	167	39	147	65	257	83	443	126	504	90	431	129	307	119	323	108	348	213	326	113	357	140	353	130	313	103	308	151	384	144	356	170	381	192	291
YBR013C	291	322	272	345	277	286	331	328	330	281	329	324	405	310	359	319	346	298	262	235	268	278	252	223	334	119	234	139	220	130	372	336	263	262	295	379	300	376	328	452	289	432	268	371	281	299	270	356	299
YBR015C	#N/A	#N/A	#N/A	#N/A	#N/A	#N/A	#N/A	#N/A	#N/A	#N/A	#N/A	#N/A	#N/A	#N/A	#N/A	#N/A	#N/A	#N/A	#N/A	#N/A	#N/A	#N/A	#N/A	#N/A	#N/A	#N/A	#N/A	#N/A	#N/A	#N/A	#N/A	#N/A	#N/A	#N/A	#N/A	#N/A	#N/A	#N/A	#N/A	#N/A	#N/A	#N/A	#N/A	#N/A	#N/A	#N/A	#N/A	#N/A	#N/A
YBR016W	#N/A	#N/A	#N/A	#N/A	#N/A	#N/A	#N/A	#N/A	#N/A	#N/A	#N/A	#N/A	#N/A	#N/A	#N/A	#N/A	#N/A	#N/A	#N/A	#N/A	#N/A	#N/A	#N/A	#N/A	#N/A	#N/A	#N/A	#N/A	#N/A	#N/A	#N/A	#N/A	#N/A	#N/A	#N/A	#N/A	#N/A	#N/A	#N/A	#N/A	#N/A	#N/A	#N/A	#N/A	#N/A	#N/A	#N/A	#N/A	#N/A
YBR024W	873	944	822	946	857	1035	860	851	813	913	856	894	558	465	589	495	475	501	890	731	839	694	925	593	616	398	952	521	828	434	897	783	925	824	822	788	747	869	777	788	730	810	795	936	803	897	816	894	735
YBR038W	#N/A	#N/A	#N/A	#N/A	#N/A	#N/A	#N/A	#N/A	#N/A	#N/A	#N/A	#N/A	#N/A	#N/A	#N/A	#N/A	#N/A	#N/A	#N/A	#N/A	#N/A	#N/A	#N/A	#N/A	#N/A	#N/A	#N/A	#N/A	#N/A	#N/A	#N/A	#N/A	#N/A	#N/A	#N/A	#N/A	#N/A	#N/A	#N/A	#N/A	#N/A	#N/A	#N/A	#N/A	#N/A	#N/A	#N/A	#N/A	#N/A
YBR039W	379	365	341	382	361	378	344	391	395	393	363	387	305	220	290	242	276	218	336	273	402	336	336	276	290	123	425	139	323	101	372	432	379	448	295	441	294	250	279	254	277	296	403	479	401	419	419	452	343
YBR055C	253	139	284	177	303	187	480	449	433	399	440	393	126	61	182	65	169	69	572	267	361	252	579	231	334	90	337	59	311	84	251	215	336	191	248	227	315	298	328	320	330	327	255	166	350	202	288	213	257
YBR086C	#N/A	#N/A	#N/A	#N/A	#N/A	#N/A	#N/A	#N/A	#N/A	#N/A	#N/A	#N/A	#N/A	#N/A	#N/A	#N/A	#N/A	#N/A	#N/A	#N/A	#N/A	#N/A	#N/A	#N/A	#N/A	#N/A	#N/A	#N/A	#N/A	#N/A	#N/A	#N/A	#N/A	#N/A	#N/A	#N/A	#N/A	#N/A	#N/A	#N/A	#N/A	#N/A	#N/A	#N/A	#N/A	#N/A	#N/A	#N/A	#N/A
YBR088C	427	574	455	571	406	545	510	633	538	642	535	602	74	0	68	0	71	0	724	712	553	688	616	661	299	159	381	145	336	157	339	299	357	298	357	284	323	195	279	258	289	261	322	359	341	386	282	328	299
YBR091C	192	294	250	295	277	261	185	240	191	244	191	235	122	98	111	102	116	109	399	595	239	538	346	620	273	247	322	190	336	218	218	254	210	273	326	230	305	392	270	355	280	350	197	188	218	222	222	214	312
YBR095C	209	236	233	223	156	223	253	267	241	288	233	253	83	31	85	17	67	39	304	225	251	256	271	238	308	145	395	118	246	95	299	244	252	273	248	265	223	183	228	208	245	179	208	264	271	260	219	284	114
YBR098W_1	#N/A	#N/A	#N/A	#N/A	#N/A	#N/A	#N/A	#N/A	#N/A	#N/A	#N/A	#N/A	#N/A	#N/A	#N/A	#N/A	#N/A	#N/A	#N/A	#N/A	#N/A	#N/A	#N/A	#N/A	#N/A	#N/A	#N/A	#N/A	#N/A	#N/A	#N/A	#N/A	#N/A	#N/A	#N/A	#N/A	#N/A	#N/A	#N/A	#N/A	#N/A	#N/A	#N/A	#N/A	#N/A	#N/A	#N/A	#N/A	#N/A
YBR119W	#N/A	#N/A	#N/A	#N/A	#N/A	#N/A	#N/A	#N/A	#N/A	#N/A	#N/A	#N/A	#N/A	#N/A	#N/A	#N/A	#N/A	#N/A	#N/A	#N/A	#N/A	#N/A	#N/A	#N/A	#N/A	#N/A	#N/A	#N/A	#N/A	#N/A	#N/A	#N/A	#N/A	#N/A	#N/A	#N/A	#N/A	#N/A	#N/A	#N/A	#N/A	#N/A	#N/A	#N/A	#N/A	#N/A	#N/A	#N/A	#N/A
YBR132C	162	106	152	105	147	119	219	214	187	221	217	192	191	132	169	139	201	155	199	164	204	113	215	165	273	82	176	67	142	85	234	216	263	216	264	176	195	128	200	146	217	184	216	217	176	218	221	206	299
YBR146W	314	286	310	307	236	261	310	272	292	263	278	262	636	465	637	481	609	479	220	122	262	172	290	172	396	150	307	111	233	121	348	300	263	311	248	349	343	399	334	268	346	344	367	364	385	422	374	433	468
YBR158W	29	44	36	39	18	28	234	221	175	154	199	154	#N/A	#N/A	#N/A	#N/A	#N/A	#N/A	173	122	146	89	121	172	35	21	29	28	13	22	89	66	63	63	62	64	44	92	79	132	101	131	27	12	20	28	28	19	#N/A
YBR164C	345	380	327	425	290	397	384	433	351	418	371	445	224	255	228	221	196	248	404	180	390	216	346	160	299	207	351	146	246	182	186	348	231	330	341	362	248	204	200	210	249	214	321	305	254	304	264	313	255
YBR172C	188	131	226	109	236	98	197	102	189	85	191	119	60	19	74	31	87	35	121	17	146	17	149	9	114	51	220	43	285	38	283	184	189	113	155	125	205	71	225	81	236	84	233	205	240	159	210	157	135
YBR173C	223	176	190	248	228	180	108	110	132	105	130	112	365	242	451	328	415	279	144	124	117	155	103	170	255	191	205	144	181	205	97	215	242	201	326	256	148	201	200	272	142	238	241	301	263	260	239	291	288
YBR182C	180	176	216	222	187	214	159	179	148	177	148	151	21	0	27	0	33	0	118	102	192	182	140	164	158	44	146	49	220	40	162	168	200	154	217	166	128	101	155	122	129	103	210	188	200	230	181	202	244
YBR183W	468	568	421	595	442	583	374	418	363	460	367	410	350	193	222	177	261	227	491	288	332	252	542	201	308	123	176	155	298	208	251	352	221	350	295	282	241	239	285	206	274	247	326	420	312	351	273	386	359
YBR186W	254	224	291	254	303	208	270	294	275	275	258	298	231	249	217	163	225	178	428	298	262	277	364	247	370	195	322	214	440	167	291	199	179	203	171	242	259	403	249	369	280	368	283	271	247	241	285	291	239
YBR188C	239	239	281	221	299	204	423	497	423	481	456	536	81	0	65	0	69	0	491	209	274	256	691	204	255	25	249	56	285	52	283	218	189	209	217	199	276	273	310	301	343	294	243	247	254	158	256	230	634
YBR193C	464	473	467	432	393	407	433	439	411	489	450	452	334	345	389	259	363	284	328	204	414	169	411	275	484	151	468	170	311	154	550	514	294	502	419	456	397	485	455	489	415	484	363	430	412	473	437	478	522
YBR195C	233	193	221	243	223	263	217	156	177	132	185	144	160	157	182	217	147	179	184	108	169	106	168	90	167	67	161	38	181	50	194	226	168	280	295	290	187	76	194	97	167	105	302	254	209	203	284	225	190
YBR202W	235	197	197	182	196	176	178	163	177	175	166	198	48	0	64	0	69	0	289	322	175	352	205	291	141	41	190	22	116	29	170	201	168	151	155	210	215	103	137	120	214	133	213	125	145	93	238	131	109
YBR212W	351	626	404	614	393	547	361	358	342	380	379	314	133	90	158	48	134	58	837	288	355	249	262	311	387	482	220	471	285	482	210	335	284	380	233	347	264	294	282	309	343	216	210	220	194	222	241	213	216
YBR216C	332	234	245	256	326	240	314	274	304	286	256	325	188	226	194	160	147	193	360	292	227	169	159	295	229	205	234	224	194	287	420	314	252	258	357	388	253	204	310	272	195	321	268	217	251	183	272	250	70
YBR223C	106	44	118	50	112	66	185	156	184	160	156	167	57	3	62	4	65	0	205	129	175	83	233	93	194	143	249	113	181	141	162	204	252	204	295	194	287	499	343	468	315	426	259	186	207	247	258	226	70
YBR228W	308	294	317	279	286	312	461	490	438	502	389	451	45	0	85	0	71	0	320	312	618	327	476	415	414	353	337	325	440	347	477	510	221	403	357	421	351	342	295	415	343	396	339	305	303	345	351	299	366
YBR231C	429	915	356	965	401	832	372	528	294	479	233	553	472	1281	459	1273	401	1268	840	3479	344	3169	476	3173	370	947	278	805	298	687	323	516	263	431	279	465	348	749	304	813	277	947	317	604	218	498	295	501	351
YBR241C	68	12	91	18	54	19	147	145	151	142	160	146	224	122	229	109	203	100	192	111	146	99	196	65	176	254	205	242	181	216	145	128	105	107	93	98	143	78	103	91	126	102	85	46	85	38	87	31	109
YBR245C	161	77	192	94	178	78	172	206	165	206	195	205	45	0	52	0	45	0	192	62	175	56	131	42	282	60	307	70	233	90	259	278	410	301	388	223	394	338	310	365	318	325	316	205	289	159	276	175	234
YBR246W	411	380	423	427	410	424	495	529	552	552	454	533	133	46	152	78	163	43	617	741	484	902	700	786	598	427	630	412	466	336	412	465	389	371	341	381	497	634	468	605	463	643	418	381	448	380	405	437	619
YBR248C	#N/A	#N/A	#N/A	#N/A	#N/A	#N/A	#N/A	#N/A	#N/A	#N/A	#N/A	#N/A	#N/A	#N/A	#N/A	#N/A	#N/A	#N/A	#N/A	#N/A	#N/A	#N/A	#N/A	#N/A	#N/A	#N/A	#N/A	#N/A	#N/A	#N/A	#N/A	#N/A	#N/A	#N/A	#N/A	#N/A	#N/A	#N/A	#N/A	#N/A	#N/A	#N/A	#N/A	#N/A	#N/A	#N/A	#N/A	#N/A	#N/A
YBR252W	#N/A	#N/A	#N/A	#N/A	#N/A	#N/A	#N/A	#N/A	#N/A	#N/A	#N/A	#N/A	#N/A	#N/A	#N/A	#N/A	#N/A	#N/A	#N/A	#N/A	#N/A	#N/A	#N/A	#N/A	#N/A	#N/A	#N/A	#N/A	#N/A	#N/A	#N/A	#N/A	#N/A	#N/A	#N/A	#N/A	#N/A	#N/A	#N/A	#N/A	#N/A	#N/A	#N/A	#N/A	#N/A	#N/A	#N/A	#N/A	#N/A
YBR273C	197	263	253	218	210	240	123	123	108	126	126	127	26	0	47	0	56	0	39	72	192	75	149	76	158	23	161	23	194	11	202	185	252	216	186	215	166	86	67	89	151	65	124	105	125	177	124	144	78
YBR293W	155	182	120	179	143	180	34	40	29	37	41	32	207	260	185	246	189	199	3	13	41	4	0	0	70	134	88	107	129	79	89	97	126	121	93	99	77	69	112	43	94	65	115	125	91	123	117	103	140
YBR295W	148	70	173	84	174	72	185	157	175	117	152	129	52	0	35	0	45	0	71	15	169	3	131	26	194	108	146	75	129	120	259	125	273	120	217	130	248	134	270	111	249	127	234	130	265	101	249	127	203
YBR296C-A	430	570	438	589	428	558	465	474	395	510	438	570	372	357	395	333	397	343	638	557	443	363	598	404	255	213	366	285	336	213	372	443	473	438	233	423	412	504	322	506	387	546	386	479	376	462	364	501	442
YCL008C	112	93	103	86	94	68	40	16	26	17	32	11	33	0	18	0	20	0	#N/A	#N/A	#N/A	#N/A	#N/A	#N/A	114	15	88	14	129	9	113	117	126	97	62	96	118	151	134	155	126	178	106	127	94	148	127	145	122
YCL028W	#N/A	#N/A	#N/A	#N/A	#N/A	#N/A	#N/A	#N/A	#N/A	#N/A	#N/A	#N/A	#N/A	#N/A	#N/A	#N/A	#N/A	#N/A	#N/A	#N/A	#N/A	#N/A	#N/A	#N/A	#N/A	#N/A	#N/A	#N/A	#N/A	#N/A	#N/A	#N/A	#N/A	#N/A	#N/A	#N/A	#N/A	#N/A	#N/A	#N/A	#N/A	#N/A	#N/A	#N/A	#N/A	#N/A	#N/A	#N/A	#N/A
YCL031C_1	#N/A	#N/A	#N/A	#N/A	#N/A	#N/A	#N/A	#N/A	#N/A	#N/A	#N/A	#N/A	#N/A	#N/A	#N/A	#N/A	#N/A	#N/A	#N/A	#N/A	#N/A	#N/A	#N/A	#N/A	#N/A	#N/A	#N/A	#N/A	#N/A	#N/A	#N/A	#N/A	#N/A	#N/A	#N/A	#N/A	#N/A	#N/A	#N/A	#N/A	#N/A	#N/A	#N/A	#N/A	#N/A	#N/A	#N/A	#N/A	#N/A
YCL032W	#N/A	#N/A	#N/A	#N/A	#N/A	#N/A	#N/A	#N/A	#N/A	#N/A	#N/A	#N/A	#N/A	#N/A	#N/A	#N/A	#N/A	#N/A	#N/A	#N/A	#N/A	#N/A	#N/A	#N/A	#N/A	#N/A	#N/A	#N/A	#N/A	#N/A	#N/A	#N/A	#N/A	#N/A	#N/A	#N/A	#N/A	#N/A	#N/A	#N/A	#N/A	#N/A	#N/A	#N/A	#N/A	#N/A	#N/A	#N/A	#N/A
YCL045C	#N/A	#N/A	#N/A	#N/A	#N/A	#N/A	#N/A	#N/A	#N/A	#N/A	#N/A	#N/A	#N/A	#N/A	#N/A	#N/A	#N/A	#N/A	#N/A	#N/A	#N/A	#N/A	#N/A	#N/A	#N/A	#N/A	#N/A	#N/A	#N/A	#N/A	#N/A	#N/A	#N/A	#N/A	#N/A	#N/A	#N/A	#N/A	#N/A	#N/A	#N/A	#N/A	#N/A	#N/A	#N/A	#N/A	#N/A	#N/A	#N/A
YCL048W	#N/A	#N/A	#N/A	#N/A	#N/A	#N/A	#N/A	#N/A	#N/A	#N/A	#N/A	#N/A	#N/A	#N/A	#N/A	#N/A	#N/A	#N/A	#N/A	#N/A	#N/A	#N/A	#N/A	#N/A	#N/A	#N/A	#N/A	#N/A	#N/A	#N/A	#N/A	#N/A	#N/A	#N/A	#N/A	#N/A	#N/A	#N/A	#N/A	#N/A	#N/A	#N/A	#N/A	#N/A	#N/A	#N/A	#N/A	#N/A	#N/A
YCL049C	#N/A	#N/A	#N/A	#N/A	#N/A	#N/A	#N/A	#N/A	#N/A	#N/A	#N/A	#N/A	#N/A	#N/A	#N/A	#N/A	#N/A	#N/A	#N/A	#N/A	#N/A	#N/A	#N/A	#N/A	#N/A	#N/A	#N/A	#N/A	#N/A	#N/A	#N/A	#N/A	#N/A	#N/A	#N/A	#N/A	#N/A	#N/A	#N/A	#N/A	#N/A	#N/A	#N/A	#N/A	#N/A	#N/A	#N/A	#N/A	#N/A
YCL057W	#N/A	#N/A	#N/A	#N/A	#N/A	#N/A	#N/A	#N/A	#N/A	#N/A	#N/A	#N/A	#N/A	#N/A	#N/A	#N/A	#N/A	#N/A	#N/A	#N/A	#N/A	#N/A	#N/A	#N/A	#N/A	#N/A	#N/A	#N/A	#N/A	#N/A	#N/A	#N/A	#N/A	#N/A	#N/A	#N/A	#N/A	#N/A	#N/A	#N/A	#N/A	#N/A	#N/A	#N/A	#N/A	#N/A	#N/A	#N/A	#N/A
YCR014C	#N/A	#N/A	#N/A	#N/A	#N/A	#N/A	#N/A	#N/A	#N/A	#N/A	#N/A	#N/A	#N/A	#N/A	#N/A	#N/A	#N/A	#N/A	#N/A	#N/A	#N/A	#N/A	#N/A	#N/A	#N/A	#N/A	#N/A	#N/A	#N/A	#N/A	#N/A	#N/A	#N/A	#N/A	#N/A	#N/A	#N/A	#N/A	#N/A	#N/A	#N/A	#N/A	#N/A	#N/A	#N/A	#N/A	#N/A	#N/A	#N/A
[truncated: 4,601 more rows]
[truncated: 39 more columns]

## Sheet: Fitness_Scrores_No_Imputation
UID	BC187_YPD_Avg_log2_Fitness_Score	BC187_FDR	BY4743_YPD_Avg_log2_Fitness_Score	BY4743_FDR	DBVPG1373_YPD_Avg_log2_Fitness_Score	DBVPG1373_FDR	NCYC3290_YPD_Avg_log2_Fitness_Score	NCYC3290_FDR	Y12_YPD_Avg_log2_Fitness_Score	Y12_FDR	Y2209_YPD_Avg_log2_Fitness_Score	Y2209_FDR	Y389_YPD_Avg_log2_Fitness_Score	Y389_FDR	Y7568_YPD_Avg_log2_Fitness_Score	Y7568_FDR	YJM1273_YPD_Avg_log2_Fitness_Score	YJM1273_FDR	YJM1389_YPD_Avg_log2_Fitness_Score	YJM1389_FDR	YJM1592_YPD_Avg_log2_Fitness_Score	YJM1592_FDR	YJM978_YPD_Avg_log2_Fitness_Score	YJM978_FDR	YPS128_YPD_Avg_log2_Fitness_Score	YPS128_FDR	YPS163_YPD_Avg_log2_Fitness_Score	YPS163_FDR	YPS606_YPD_Avg_log2_Fitness_Score	YPS606_FDR
[truncated: 4,112 more rows]

[truncated: 4 more sheets: Fitness_Scores_Imputed, Commonly Deleterious Genes, Strain Specific Deleterious, Strain Specific Beneficial]
