# Supplementary material for: Natural variation in the consequences of gene overexpression and its implications for evolutionary trajectories
Source: eLife. 2021 Aug 2;10:e70564. doi: 10.7554/eLife.70564 (PMC8352584; doi:10.7554/eLife.70564)
Supplement: Supplementary file 5. — Tab 1: Unnormalized reads counts per gene as outputted by HT-Seq. Tab 2: Average log2(expression ratio) comparing indicated strain versus the mean of all strains, followed by the FDR value, as outputted by edgeR and for each strain. [file elife-70564-supp5.xlsx]

## Sheet: Unnormalized_Read_Counts
UID	MeanStrain_Rep1	MeanStrain_Rep2	MeanStrain_Rep3	BY4743_Rep1	BY4743_Rep2	BY4743_Rep3	BC187_Rep1	BC187_Rep2	BC187_Rep3	DBVPG1373_Rep1	DBVPG1373_Rep2	DBVPG1373_Rep3	YJM978_Rep1	YJM978_Rep2	YJM978_Rep3	NCYC3290_Rep1	NCYC3290_Rep2	NCYC3290_Rep3	Y12_Rep1	Y12_Rep2	Y12_Rep3	YJM1592_Rep1	YJM1592_Rep2	YJM1592_Rep3	YJM1389_Rep1	YJM1389_Rep2	YJM1389_Rep3	YJM1273_Rep1	YJM1273_Rep2	YJM1273_Rep3	YPS128_Rep1	YPS128_Rep2	YPS128_Rep3	YPS163_Rep1	YPS163_Rep2	YPS163_Rep3	YPS606_Rep1	YPS606_Rep2	YPS606_Rep3	Y2209_Rep1	Y2209_Rep2	Y2209_Rep3	Y389_Rep1	Y389_Rep2	Y389_Rep3	Y7568_Rep1	Y7568_Rep2	Y7568_Rep3
Q0010	0	0	0	0	0	0	0	0	1	0	0	0	0	0	0	0	0	0	0	0	0	1	1	1	0	0	0	0	0	0	0	0	0	0	0	0	0	0	0	0	0	0	0	0	0	0	0	0
Q0017	0	0	0	0	0	0	0	0	0	0	0	0	0	0	0	0	0	0	0	0	0	0	0	0	0	0	0	0	0	0	0	0	0	0	0	0	0	0	0	0	0	0	0	0	0	0	0	0
Q0032	0	1	1	1	1	2	0	0	0	0	3	0	0	0	0	0	0	0	0	1	3	0	3	3	1	0	4	0	0	0	2	1	0	0	0	0	0	2	0	1	0	0	1	0	0	0	0	2
Q0045	5631	5983	5901	2721	2266	2951	3686	3412	4168	6755	6576	6362	4912	4863	5214	5249	5648	4959	3	6014	6357	8754	7898	8524	3103	3169	7206	4705	11751	4090	11919	8850	7748	7222	7831	8594	6111	7355	7025	5177	4824	6402	9005	4326	4305	5138	4961	4603
Q0050	3355	3000	3359	8502	6174	6631	4	0	1	6678	5349	5816	0	2	2	8925	7184	4990	0	7013	7547	1	3	0	3297	2570	7885	0	0	0	0	1	2	2	2	2	0	1	0	6596	6253	8334	8548	3135	3451	7771	7317	5718
Q0055	3448	3826	3828	6601	4903	5409	2936	3140	4029	0	0	2	3204	4337	3677	0	0	3	0	6163	6093	1	3	0	2785	2204	6442	3304	6694	3204	10671	6518	5047	4288	5695	5553	3923	5057	4502	6420	5801	8235	0	0	0	7587	6874	5226
Q0060	92	65	94	288	136	261	125	113	207	80	85	86	45	41	36	132	104	108	0	58	75	0	0	0	58	24	122	0	0	0	0	0	0	0	1	0	0	0	0	216	142	274	152	57	70	288	220	174
Q0065	271	195	310	552	273	452	256	205	455	503	485	516	0	0	1	668	456	494	0	0	0	361	496	1100	213	150	603	0	0	0	0	0	0	0	0	0	0	0	0	370	181	521	562	192	236	582	480	278
Q0070	14	17	15	17	20	18	29	22	42	24	34	33	0	0	0	37	27	26	0	0	0	0	0	0	0	0	0	19	43	14	64	43	31	10	29	39	15	31	18	0	0	0	0	0	0	0	0	0
Q0075	244	214	232	278	260	304	260	289	231	0	0	0	99	79	81	0	0	0	0	126	116	198	124	167	354	255	1017	234	659	159	1038	443	427	372	325	458	349	460	344	0	0	0	472	190	178	0	0	0
Q0080	19	24	23	1	3	1	6	4	6	133	186	154	3	11	6	117	120	133	0	4	3	6	3	3	3	1	5	2	4	4	3	5	10	3	7	13	5	0	3	2	4	1	4	1	0	2	0	1
Q0085	349	390	464	818	532	836	48	45	73	228	223	277	42	322	40	260	219	130	0	610	598	1234	1091	1887	717	412	1622	187	415	257	479	683	244	222	426	277	206	220	206	153	133	239	418	154	154	228	364	116
Q0092	0	0	1	0	0	0	0	0	0	1	0	1	1	0	0	2	0	1	0	0	0	0	0	0	0	0	1	0	0	0	0	1	0	0	0	0	0	0	0	1	2	4	0	0	0	2	1	6
Q0105	1612	1764	1835	1382	757	1228	1056	793	1485	2413	2418	2343	879	1604	1035	2351	1797	1823	0	1618	1844	2597	2617	3561	1113	746	2234	1395	2823	1539	3425	3300	2305	1434	2594	2188	1165	2009	1819	1352	957	2055	2088	837	818	1525	1595	1247
Q0110	80	77	79	126	83	144	0	0	1	0	1	1	0	1	0	0	1	1	0	0	0	111	81	145	0	0	0	105	163	94	311	233	162	87	178	162	79	114	123	127	84	175	107	55	36	151	159	141
Q0115	23	24	21	24	10	15	9	5	6	12	18	12	9	13	4	12	16	8	0	32	19	19	18	13	24	19	52	6	35	10	52	31	17	12	20	21	17	21	13	59	56	73	20	6	6	65	65	53
Q0120	314	324	381	391	222	360	310	345	545	446	414	470	275	418	333	453	335	398	0	223	301	215	333	567	131	62	494	283	464	274	601	613	378	336	395	451	254	426	317	362	202	502	243	52	54	413	355	269
Q0130	3829	4029	3876	2932	2460	2288	2638	2219	3558	3877	3280	3572	2866	3202	2551	3189	2753	2586	1	4885	4946	4813	3929	3809	2188	1217	3369	2573	7463	2456	6343	4717	5227	4125	5163	4728	4112	3757	3649	5295	6621	6613	6351	2451	2019	6133	6321	6763
Q0140	45	42	49	95	65	63	6	10	6	3	1	2	39	44	36	3	4	8	1	63	86	116	78	75	13	12	52	1	2	2	2	4	6	2	5	5	2	4	3	117	150	190	130	72	36	142	120	162
Q0142	1	2	2	2	1	1	0	1	6	2	3	3	0	2	3	3	2	1	0	1	2	1	2	3	2	1	1	0	2	1	4	0	1	0	2	4	0	0	2	0	1	0	4	3	0	2	2	0
Q0143	1	1	0	1	2	0	0	0	0	1	1	0	0	0	0	3	2	0	0	1	2	1	1	1	0	0	0	0	1	0	3	0	0	0	0	1	1	0	0	1	0	0	4	0	0	0	0	1
Q0144	0	0	0	0	0	0	0	0	0	0	0	0	0	0	0	0	0	0	0	0	0	0	0	0	0	0	0	0	0	0	0	0	0	0	0	0	0	0	0	0	0	0	0	0	0	0	0	0
Q0160	114	110	151	309	221	258	351	426	664	0	0	0	0	0	0	0	0	0	0	0	0	0	0	0	0	0	0	0	0	0	0	0	0	1	0	0	0	0	0	494	481	591	0	0	0	554	526	756
Q0182	56	46	61	42	28	23	73	71	113	32	36	43	98	75	93	40	17	35	5	37	60	112	86	117	41	29	78	37	71	32	67	49	54	34	36	62	49	33	52	32	33	55	116	53	28	61	43	64
Q0250	1881	1885	1935	1521	1068	1707	1150	1068	1593	1698	1559	1656	779	1271	791	1626	1309	1205	1082	1305	1468	1804	1666	2710	1560	918	3078	1389	3967	1397	3769	4052	3197	2134	3104	2794	2076	2440	2238	1276	1180	1766	4705	1773	1695	1645	1594	1727
Q0255	41	38	38	93	57	107	8	11	20	19	27	14	7	8	9	14	16	21	39	28	27	35	18	22	29	14	50	33	94	28	80	66	53	43	66	56	35	48	32	21	27	37	134	58	68	29	31	23
Q0275	3549	4056	3705	1875	1545	2028	966	992	1132	1800	1553	1877	1877	2193	2246	1282	1291	1343	1073	3732	4308	3097	2925	3256	3232	2443	6524	3864	11905	3789	10509	10540	7744	5911	8028	7673	5484	6269	6005	1771	1722	2488	8774	3929	3635	1718	1774	1525
Q0297	44	41	51	124	135	124	1	0	1	2	2	2	102	131	84	3	0	4	118	53	88	214	195	292	19	8	49	0	1	1	1	1	3	0	3	2	0	0	0	39	53	41	1	0	1	38	32	66
R0010W	0	0	0	0	0	0	0	0	0	0	0	0	0	0	0	0	0	0	0	0	0	0	0	0	0	0	0	0	0	0	0	0	0	0	0	0	0	0	0	0	0	0	0	0	0	0	0	0
R0020C	0	0	0	0	0	0	0	0	0	0	0	0	0	0	0	0	0	0	0	0	0	0	0	0	0	0	0	0	0	0	0	0	0	0	0	0	0	0	0	0	0	0	0	0	0	0	0	0
R0030W	0	0	0	0	0	0	0	0	0	0	0	0	0	0	0	0	0	0	0	0	0	0	0	0	0	0	0	0	0	0	0	0	0	0	0	0	0	0	0	0	0	0	0	0	0	0	0	0
R0040C	0	0	0	0	0	0	0	0	0	0	0	0	0	0	0	0	0	0	0	0	0	0	0	0	0	0	0	0	0	0	0	0	0	0	0	0	0	0	0	0	0	0	0	0	0	0	0	0
YAL001C	443	403	396	617	559	608	369	390	476	561	516	464	382	313	418	516	536	437	569	369	432	478	411	420	144	127	351	251	599	270	712	433	305	410	381	506	309	427	422	421	422	363	407	164	148	502	399	313
YAL002W	384	345	351	564	493	512	314	336	429	424	412	385	328	307	352	444	425	360	427	333	369	434	426	455	119	148	355	297	520	258	561	362	273	322	271	407	276	294	271	373	345	375	442	151	160	434	356	311
YAL003W	21533	20729	21288	19580	18295	20084	20505	18573	23742	25460	23465	23683	19660	20484	21097	21530	21715	18816	16778	20368	21468	18093	17329	18426	7230	6968	19674	22777	34480	25003	36892	27178	22901	24297	25400	29248	21984	22810	22378	24292	21543	23044	18537	7587	6593	25373	24747	23164
YAL004W	0	0	0	2	0	0	0	1	0	0	0	1	0	1	1	0	1	0	0	1	1	1	0	2	1	0	0	0	1	1	0	1	0	0	0	1	0	0	0	0	0	0	0	0	0	1	1	0
YAL005C	2961	2368	2358	9470	9086	6965	967	743	1334	2097	2129	2004	1310	992	1681	2092	1953	1145	3216	1162	2538	4629	4664	4366	804	1186	2570	880	1551	919	1944	1242	764	702	732	1036	634	818	846	2167	2741	2172	10204	4294	4799	3294	2227	2228
YAL007C	1037	1002	1007	1086	970	1090	907	834	1078	1222	1142	1056	999	934	964	939	964	792	958	799	928	1070	955	973	438	415	966	962	1782	1000	1622	1377	1208	1116	1099	1358	1034	1143	1135	1028	1140	1073	1104	456	437	1067	1014	1050
YAL008W	50	44	49	100	81	107	23	34	54	53	66	60	33	30	33	54	54	54	87	61	59	74	71	53	24	16	55	27	45	16	51	40	40	35	29	44	30	34	31	45	31	48	80	24	15	37	41	59
YAL009W	115	107	112	102	106	132	77	88	85	161	154	137	78	81	77	167	138	129	128	103	111	164	135	142	71	38	120	97	189	83	168	121	139	99	108	155	102	109	117	98	96	101	102	48	38	113	95	111
YAL010C	158	150	152	204	167	188	106	132	127	169	159	151	144	122	157	173	159	164	140	135	130	230	190	185	58	76	172	125	268	123	232	151	131	158	136	220	130	141	149	157	175	150	167	74	61	184	161	167
YAL011W	150	128	131	201	140	140	131	130	154	176	152	128	101	99	137	197	196	172	145	111	121	150	165	127	46	52	132	96	171	133	290	125	98	143	118	181	131	118	120	116	148	135	164	64	70	166	133	110
YAL012W	4777	4614	4878	4487	4177	4714	4853	4715	6075	5032	3782	4660	4623	5129	5328	3806	3926	3676	3194	4107	4567	3068	3660	3753	2287	1868	4510	5163	7969	5720	8579	7277	5847	5250	5549	6411	5120	5532	5192	5316	4685	5796	5169	1737	1580	5703	5095	5337
YAL013W	103	90	94	117	149	91	92	80	101	148	65	95	103	85	98	156	160	124	64	89	118	60	119	115	35	28	104	50	65	92	250	87	62	75	99	93	57	91	76	117	65	94	75	21	26	139	140	124
YAL014C	164	136	148	226	211	194	148	96	162	181	154	126	182	151	183	188	204	152	130	104	122	128	142	130	45	46	135	128	205	186	311	151	151	152	132	174	123	125	152	157	116	132	158	64	73	204	145	148
YAL015C	99	93	89	130	114	113	84	77	121	119	107	78	80	68	74	101	118	75	108	92	86	124	134	112	36	49	114	58	120	70	162	86	58	77	73	107	66	93	83	86	91	93	104	54	27	149	114	130
YAL016C-A	1	1	1	1	1	5	0	1	0	0	1	2	3	0	2	1	1	1	1	2	1	2	2	3	0	0	1	1	1	0	2	0	0	2	0	1	0	1	0	0	0	1	0	0	0	0	2	0
YAL016C-B	0	0	0	0	0	0	1	0	0	0	0	0	0	0	0	0	0	0	0	1	0	0	0	1	0	0	0	0	0	0	0	0	0	1	0	0	0	0	0	0	0	0	0	0	0	0	0	0
YAL016W	1535	1458	1487	1839	1654	1816	1328	1256	1507	1636	1580	1424	1323	1379	1392	1360	1440	1226	1484	1208	1332	1650	1468	1565	640	604	1639	1351	2579	1359	2622	1836	1653	1645	1595	2167	1512	1590	1694	1527	1563	1489	1508	562	557	1605	1549	1491
YAL017W	509	459	478	929	834	842	376	367	538	475	500	473	369	361	434	453	473	383	725	372	516	710	697	724	193	162	574	330	688	275	742	449	423	343	387	516	351	380	408	472	559	485	615	223	203	549	427	382
YAL018C	1	0	1	1	1	1	0	0	2	0	0	0	0	0	0	1	1	1	2	2	3	4	1	3	0	0	0	0	0	0	1	0	0	0	1	0	1	0	0	0	0	1	0	0	0	1	0	1
YAL019W	1448	1257	1362	1883	1533	1527	1237	1179	1419	1653	1381	1392	1255	1073	1386	1681	1604	1699	1207	1235	1432	1404	1498	1465	542	519	1501	1204	1712	1231	2481	1348	1105	1505	1338	1749	1197	1276	1269	1484	1279	1362	1291	459	464	1700	1423	1422
YAL019W-A	2	1	1	7	1	3	2	0	1	2	0	1	2	2	0	5	1	1	5	0	0	1	2	4	1	1	1	0	0	2	5	4	2	2	1	0	0	1	3	0	1	1	4	0	0	0	3	3
YAL020C	60	49	51	79	92	93	34	37	55	78	19	57	52	55	40	103	89	51	38	37	52	18	51	51	24	22	43	28	40	52	154	84	49	40	52	50	39	38	46	54	20	37	64	13	15	90	82	69
YAL021C	1113	971	1054	1261	1139	1188	941	919	1213	1317	1137	1181	977	908	1087	1216	1170	1189	1070	919	1006	1174	1379	1247	345	392	1003	882	1255	976	1955	1045	877	1140	1005	1331	901	968	988	1125	922	1061	983	390	392	1404	1023	1066
YAL022C	330	293	333	544	497	580	300	308	405	414	284	378	284	349	313	337	316	281	215	224	261	383	414	448	149	134	400	303	398	276	489	312	291	260	271	288	277	205	259	313	269	360	352	151	124	335	264	328
YAL023C	4824	4477	4677	5082	4419	4846	4008	4128	4927	6961	6393	6382	4272	4231	4432	4921	5113	5180	3942	3626	3742	3847	4071	4195	1937	1766	4431	5158	7274	4697	8129	6054	5262	5198	4644	6344	4676	4960	5101	4593	4604	4688	4997	1800	1794	4636	4072	4131
YAL024C	673	628	627	793	749	734	525	557	722	801	781	683	626	501	633	795	852	711	635	581	609	747	732	730	230	283	672	526	900	545	1150	669	463	698	679	780	553	653	601	706	631	659	583	223	224	730	622	634
YAL025C	718	668	684	528	504	584	557	600	608	821	607	515	583	603	570	752	694	737	671	721	628	734	707	781	322	251	634	739	1097	695	1259	987	761	886	794	1156	740	885	943	637	566	612	796	282	277	751	724	753
YAL026C	1204	1146	1186	1900	1757	1926	958	979	1143	1534	1469	1345	1055	1058	1242	1217	1441	1282	1135	946	1062	1234	1137	1122	498	528	1427	977	1599	899	1752	1308	988	1151	1066	1531	962	1086	1019	1125	1237	1221	1204	444	465	1360	1132	1122
YAL026C-A	30	25	28	57	46	41	17	11	25	36	22	31	13	23	23	39	29	23	26	28	26	28	13	43	20	15	41	22	33	20	39	40	23	27	22	27	17	34	26	31	19	39	32	11	12	41	28	19
YAL027W	79	77	80	91	84	86	80	84	72	81	99	79	65	78	74	73	69	68	116	85	84	100	89	127	25	28	100	50	127	52	104	81	86	76	88	87	77	66	79	75	71	91	84	34	25	91	73	92
YAL028W	23	18	22	43	40	44	10	10	10	47	28	34	16	17	11	32	35	27	25	17	23	26	18	29	15	7	26	7	13	15	28	18	28	18	15	15	13	7	18	9	10	11	44	19	12	16	18	21
YAL029C	2057	1875	1961	2274	2067	2266	1647	1774	1965	2123	2142	1721	1932	1840	2212	1918	2007	1993	2097	1702	1872	2234	2167	2182	787	729	2078	1900	2674	1758	3051	2071	1720	2341	1902	2601	1872	1978	1960	2335	2190	2047	1927	753	739	2415	2127	2296
YAL030W	227	207	210	268	282	286	195	176	260	233	244	178	214	193	211	228	188	170	292	203	242	337	311	317	67	70	170	135	331	135	359	247	187	221	201	314	191	187	232	218	204	185	218	68	92	223	201	172
YAL031C	194	174	186	289	234	280	159	173	226	229	240	216	162	167	198	189	200	157	218	158	186	238	235	211	71	68	218	141	270	126	288	168	158	174	147	229	140	147	181	186	190	177	209	59	66	214	158	154
YAL031W-A	1	0	1	0	1	1	2	0	0	0	1	0	0	0	0	1	1	1	0	0	0	4	1	1	0	0	0	0	0	0	1	0	0	0	0	2	0	0	0	0	0	0	0	0	2	1	0	1
YAL032C	149	143	148	163	149	171	126	130	157	212	180	163	115	125	116	174	180	158	139	143	159	147	138	145	49	54	172	126	209	143	231	153	125	205	166	212	140	147	156	139	152	129	119	69	58	155	147	152
YAL033W	189	181	186	172	159	202	142	108	147	250	252	226	182	189	170	203	234	206	179	146	162	179	188	179	82	70	167	168	327	168	293	244	222	226	210	263	187	193	206	180	184	217	191	47	48	197	166	207
YAL034C	119	105	110	143	120	134	94	82	103	164	129	99	83	100	114	129	121	148	100	95	103	124	125	123	44	44	100	94	171	94	202	122	86	125	102	168	111	105	125	115	116	100	111	52	38	153	95	111
YAL034C-B	0	0	0	0	0	0	0	0	0	0	0	1	0	0	0	0	0	0	0	0	0	0	1	0	0	0	0	0	1	0	0	0	0	0	0	0	0	0	0	0	0	0	0	0	0	0	1	0
YAL034W-A	80	81	77	79	67	85	51	54	79	95	88	76	71	64	60	81	80	80	85	73	82	73	88	95	28	21	59	67	149	60	139	124	85	90	93	115	85	117	104	92	75	71	75	33	21	93	83	76
YAL035W	5764	4969	5277	7192	6437	6400	4760	4532	5735	5717	4741	4410	5606	4633	5784	6343	6801	6099	4455	5131	5479	4861	5076	5118	2339	2356	6756	4820	6285	5341	11590	4980	3870	6334	5269	6885	4474	4994	4869	5740	5295	5241	5044	1990	1786	7181	6010	5375
YAL036C	941	863	892	958	834	858	834	806	931	1204	940	846	881	856	817	1031	944	986	756	807	827	743	801	786	384	350	894	838	1329	966	1730	1145	984	980	1047	1360	879	1017	1011	869	763	765	911	349	328	1124	954	1024
YAL037C-A	0	0	0	0	0	1	0	0	1	1	0	1	0	0	1	1	0	1	0	1	0	0	0	1	0	0	0	0	0	1	1	0	0	0	1	0	0	0	0	1	0	0	0	0	0	1	0	0
YAL037C-B	18	17	16	31	21	21	18	9	21	26	30	17	14	20	15	14	18	5	14	9	18	6	3	11	6	3	10	14	21	29	23	31	17	17	17	16	14	15	24	25	14	24	19	8	3	32	31	14
YAL037W	19	16	15	25	27	26	13	16	10	23	30	18	18	13	13	20	15	23	33	18	21	25	22	14	1	2	7	18	23	13	21	9	23	18	18	15	13	12	12	10	10	7	34	15	9	6	10	17
YAL038W	88491	80633	87385	127197	115741	130212	76108	75635	94349	114115	94673	100349	77738	78657	86790	90959	89892	86997	80266	71653	80359	60809	63905	63909	29759	27367	69926	92832	107183	100802	129269	97702	88526	88199	87626	103321	77209	84672	83610	91022	88590	96195	86886	31902	29751	104990	94300	95675
YAL039C	123	90	102	131	113	100	103	69	120	166	52	112	89	115	86	218	172	127	116	98	115	74	127	151	39	45	130	36	88	87	328	103	94	77	104	94	67	66	82	79	47	64	179	61	34	148	93	134
YAL040C	1055	986	1106	502	453	516	1029	1134	1253	1192	1052	1182	1079	1212	1239	879	926	1063	717	826	938	1079	1093	1204	517	449	1088	1298	1676	1120	1665	1126	877	1233	1018	1334	987	1065	1094	1299	1239	1448	985	347	291	1368	1181	1947
YAL041W	769	684	716	927	722	819	510	601	712	868	777	711	630	586	788	866	862	741	790	709	814	695	683	675	344	308	987	717	1095	701	1311	759	596	851	746	936	697	748	703	788	715	669	692	269	268	849	673	614
YAL042C-A	1	0	0	0	0	0	0	0	0	0	0	0	2	0	0	1	0	0	0	1	0	3	2	2	1	0	0	0	0	2	4	0	0	0	0	0	0	0	0	0	0	0	1	0	0	0	0	0
YAL042W	1105	982	1035	1928	1750	1793	886	717	1187	1391	933	1177	816	992	880	1353	1372	1003	751	581	726	704	929	987	476	386	1053	677	1071	1008	2138	1282	976	790	937	1024	654	880	865	1205	1006	1206	1103	426	336	1699	1462	1302
YAL043C	652	557	602	744	704	606	522	480	653	761	614	696	553	525	634	779	780	675	479	529	578	574	590	581	254	278	741	500	750	506	1287	604	506	678	530	719	464	493	606	688	589	667	701	257	254	798	633	613
YAL044C	541	506	500	1191	980	1018	409	369	500	778	542	679	448	462	378	635	627	501	471	270	410	364	344	410	259	215	746	204	859	304	1056	849	631	548	727	698	540	590	542	252	257	220	731	226	197	234	277	264
YAL044W-A	124	121	114	144	160	158	95	71	93	201	204	197	91	116	81	141	119	124	126	114	104	129	118	119	46	47	85	88	202	95	197	140	123	93	115	154	92	111	111	126	146	112	163	36	36	123	117	114
YAL045C	0	1	1	2	1	2	0	1	0	0	1	1	1	0	0	0	0	0	0	1	0	0	0	1	1	1	4	0	1	0	1	1	0	0	1	1	0	2	1	2	1	0	0	0	0	0	4	1
YAL046C	128	121	113	145	135	123	90	89	110	162	138	127	135	108	88	162	131	122	100	114	104	140	118	98	57	46	123	65	193	78	213	170	116	121	126	147	116	97	94	124	161	144	160	52	56	123	135	166
YAL047C	180	163	168	208	205	204	129	118	161	226	214	190	167	126	177	229	244	211	145	140	187	198	204	203	69	65	185	148	231	135	305	158	127	195	191	211	144	186	181	160	134	140	193	73	76	186	152	126
YAL047W-A	0	1	1	0	2	2	0	4	0	2	2	1	0	0	0	0	1	0	0	0	2	1	2	3	0	0	0	0	1	0	1	2	0	0	0	1	0	2	1	0	0	0	0	0	0	0	0	1
YAL048C	188	164	175	212	194	212	134	137	178	223	169	180	148	132	187	212	206	174	198	161	197	238	228	224	82	96	202	123	256	109	307	165	165	173	168	203	147	146	164	192	178	183	221	69	79	211	162	175
YAL049C	433	407	399	414	361	380	350	352	504	481	428	437	398	382	390	492	475	343	427	327	343	649	559	633	70	105	186	384	801	393	749	531	487	489	462	631	418	462	470	303	297	280	508	217	187	364	340	318
YAL051W	397	358	368	559	470	468	315	347	424	403	387	360	413	400	452	400	442	410	403	297	397	431	382	375	160	193	442	300	545	314	729	338	237	325	340	446	350	373	455	358	339	337	351	144	121	465	369	285
YAL053W	1232	1156	1280	1111	992	1185	1490	1503	1860	1569	1441	1471	1278	1272	1360	1181	1279	1172	1491	1049	1331	1140	1280	1357	781	598	1719	930	1703	918	1436	1152	861	996	881	1131	881	960	964	1554	1497	1607	1103	387	443	1536	1345	1817
YAL054C	33	30	33	37	41	47	26	30	39	35	32	47	25	36	29	24	22	29	51	24	51	54	40	40	14	13	37	19	61	26	44	27	35	30	31	34	20	20	28	24	31	26	54	19	12	35	29	21
YAL055W	35	34	36	48	43	40	21	18	39	42	40	33	29	27	35	25	32	37	40	33	35	69	60	50	18	11	35	20	61	20	48	30	48	27	34	44	24	35	32	42	36	40	31	18	11	37	35	44
YAL056C-A	0	0	0	0	0	0	0	2	0	0	0	0	1	1	0	1	0	0	0	0	0	0	1	0	0	0	1	0	0	0	0	0	0	0	0	0	0	0	0	1	0	1	2	0	0	0	1	0
YAL056W	274	242	274	699	544	638	140	146	212	226	254	234	176	167	184	210	232	194	511	488	533	317	270	269	227	257	626	119	253	117	314	192	172	164	148	231	139	168	190	226	188	177	413	153	147	234	175	187
YAL058W	217	198	207	302	241	236	172	182	203	294	204	238	203	205	200	254	221	227	196	186	210	216	254	246	75	95	232	157	274	157	341	207	193	201	188	235	165	166	206	195	229	225	234	74	79	251	243	218
YAL059C-A	1	1	1	1	0	3	0	0	0	1	1	3	0	1	2	2	0	0	1	0	0	2	2	4	1	1	0	0	3	1	6	2	0	1	1	0	0	1	2	0	0	2	6	0	0	1	2	2
YAL059W	635	586	618	440	340	409	578	549	567	613	537	503	538	523	475	565	472	551	482	558	522	794	688	877	265	203	515	719	1037	673	1045	909	762	764	757	1053	745	656	694	603	690	663	649	208	198	721	663	808
YAL060W	424	407	378	541	503	503	326	315	288	444	428	363	144	152	130	380	336	284	447	204	243	245	246	262	116	125	264	384	982	380	987	644	762	542	658	697	558	617	603	322	338	292	623	211	205	307	342	395
YAL061W	12	10	9	36	42	33	7	3	4	29	21	26	4	5	2	26	21	24	12	10	14	5	9	4	6	6	6	0	11	2	13	1	3	5	6	3	6	4	4	4	0	2	16	17	3	6	1	7
YAL062W	5	4	4	32	27	14	1	4	0	3	6	8	4	1	2	11	9	5	6	1	4	0	3	4	4	3	5	3	2	4	7	3	3	1	0	2	2	2	1	0	0	2	8	2	4	0	2	1
YAL063C	60	29	57	15	8	6	0	3	0	53	56	43	13	28	30	39	43	42	14	15	22	16	18	15	0	3	6	531	14	523	31	40	28	76	94	41	53	49	19	15	37	32	16	4	10	21	19	33
YAL063C-A	0	1	1	3	3	6	0	0	0	0	0	0	0	0	0	0	0	0	0	0	0	0	0	0	0	0	0	0	1	1	2	2	1	1	0	1	1	2	2	0	0	0	0	0	0	0	1	0
YAL064C-A	1	1	1	0	0	0	0	0	0	0	0	0	0	0	0	0	0	1	3	2	4	0	0	0	0	1	2	4	2	2	3	3	0	1	0	1	0	2	0	0	0	0	0	0	0	0	0	0
YAL064W	0	1	1	1	2	0	0	0	0	0	0	0	0	0	0	0	0	0	0	0	0	0	0	0	0	0	0	0	2	0	3	1	2	1	2	5	1	1	1	0	0	0	1	1	1	0	0	0
YAL064W-B	3	2	2	10	13	9	0	0	0	10	3	5	0	0	0	4	1	4	5	3	2	0	0	0	1	1	0	0	2	1	5	2	0	1	0	0	0	2	1	0	0	0	5	2	3	0	0	1
YAL065C	38	16	48	0	0	0	0	0	0	11	15	13	0	0	0	5	10	16	10	7	8	6	6	13	3	4	5	316	3	288	3	12	6	34	23	19	25	28	13	75	61	84	14	3	4	62	64	246
YAL066W	1	1	1	0	0	1	0	0	0	0	0	0	0	0	0	0	2	0	0	0	0	2	1	2	0	0	2	0	0	0	0	0	0	0	1	0	0	0	0	1	1	0	3	2	4	2	2	2
YAL067C	17	16	15	3	3	6	0	0	0	45	45	31	0	0	0	24	28	31	45	31	42	12	12	14	36	50	55	1	3	3	9	3	3	3	2	3	3	2	3	15	20	15	45	26	11	17	21	15
YAL067W-A	0	0	0	0	0	0	0	0	0	0	0	0	0	0	0	0	0	0	0	0	0	0	0	0	0	0	1	0	0	0	0	0	0	0	0	0	0	0	0	0	0	0	0	0	0	0	0	0
YAL068C	4	4	4	1	0	0	4	2	3	2	0	2	6	10	4	0	0	1	1	1	0	1	7	7	0	0	0	9	12	7	14	8	10	11	7	11	6	11	5	3	2	6	0	0	0	7	6	6
YAL068W-A	0	0	0	0	0	0	0	0	0	3	1	0	0	0	0	0	1	1	0	0	0	0	0	0	0	0	0	0	0	0	0	0	0	0	0	0	0	0	0	0	0	0	0	0	0	0	0	0
YAL069W	1	0	0	0	0	0	0	0	0	3	1	4	0	0	0	5	0	2	0	0	0	0	0	0	0	0	0	0	0	0	0	0	0	0	0	0	0	0	0	0	0	0	0	0	0	0	0	0
YAR002C-A	1360	1292	1329	1367	1375	1473	1355	1271	1560	1614	1619	1448	1286	1195	1234	1216	1138	1112	1114	924	977	1542	1180	1335	440	425	1011	1290	2283	1152	2022	1739	1629	1375	1463	1933	1450	1412	1605	1297	1538	1454	1613	575	620	1421	1240	1390
YAR002W	833	773	800	876	823	837	639	633	795	905	910	743	707	627	700	867	839	770	698	684	745	1031	863	921	301	294	877	818	1202	785	1312	866	720	963	896	1216	810	889	860	884	867	867	632	268	284	1052	940	882
YAR003W	308	287	305	272	245	348	231	275	311	373	355	338	299	260	280	333	289	296	299	216	254	370	317	358	129	136	293	266	428	213	416	321	349	292	262	363	266	268	310	370	411	399	302	107	109	403	415	360
YAR007C	892	848	830	969	901	962	802	767	922	968	956	868	915	693	788	894	933	734	1023	850	996	1088	1107	962	252	346	956	595	1164	603	1441	832	652	804	866	1008	721	857	808	998	1058	1044	822	341	293	1086	1054	859
YAR008W	134	132	133	134	122	160	95	102	118	209	183	188	105	129	95	193	165	135	133	129	120	136	136	140	65	43	121	92	183	109	183	144	137	104	138	163	120	123	132	178	166	154	125	47	54	141	173	166
YAR009C	2	1	1	31	21	17	0	0	0	0	0	0	0	0	0	0	0	0	0	0	0	0	0	0	0	0	0	0	0	0	0	0	0	0	0	0	0	0	0	0	0	0	0	0	0	0	0	0
YAR010C	0	0	0	0	0	0	0	0	0	0	0	0	0	0	0	0	0	0	0	0	0	0	0	0	0	0	0	0	0	0	0	0	0	0	0	0	0	0	0	0	0	0	0	0	0	0	0	0
YAR014C	609	542	564	710	609	562	658	591	724	702	599	520	633	487	647	707	678	611	478	530	521	597	613	656	207	207	569	468	745	487	964	592	453	691	543	775	504	560	579	589	564	514	534	217	204	687	588	637
YAR015W	816	671	682	1208	940	1033	828	613	680	740	643	531	1248	835	598	729	629	587	619	742	973	561	447	546	297	217	720	429	990	526	1380	667	576	810	951	1160	685	741	919	715	597	383	1332	491	297	664	558	694
YAR018C	275	245	271	318	252	220	243	250	348	328	313	280	253	247	329	361	386	372	185	232	236	432	357	376	94	84	270	190	304	203	436	185	131	220	193	341	193	187	239	280	268	288	178	63	62	418	348	373
YAR019C	186	173	185	255	215	241	155	193	211	210	192	186	170	163	181	177	197	190	209	174	197	205	215	190	81	67	185	145	256	158	264	158	185	177	151	209	129	168	184	196	205	190	205	74	66	209	162	206
YAR019W-A	1	1	1	1	0	1	1	1	1	2	1	2	1	0	0	2	1	3	0	1	1	0	1	0	0	1	3	1	0	1	3	1	0	0	2	0	1	0	0	2	2	0	2	1	0	0	1	2
YAR020C	4	5	5	4	5	3	1	1	5	4	5	10	1	7	6	2	6	3	1	6	5	1	2	4	2	1	6	4	3	3	7	5	4	5	7	2	4	5	4	5	9	10	6	4	2	9	6	5
YAR023C	43	40	41	34	30	30	29	24	25	59	53	50	30	34	38	44	29	39	38	31	51	24	35	34	12	6	29	53	107	36	97	61	79	67	54	85	49	62	52	28	35	36	32	10	13	44	29	22
YAR027W	87	89	88	261	263	277	61	83	78	266	272	272	129	167	134	209	207	203	1	0	0	23	10	14	5	5	9	27	54	18	45	26	37	32	34	44	21	31	29	75	84	86	62	18	22	86	80	93
YAR028W	74	72	78	158	151	234	0	0	0	133	121	136	71	64	56	113	100	112	0	0	0	43	46	48	0	0	0	119	204	94	210	152	165	137	129	209	119	109	120	0	0	0	0	0	0	0	0	0
YAR029W	31	30	28	23	26	28	0	0	0	49	32	33	17	19	16	37	47	28	0	0	0	8	4	12	15	21	33	71	116	52	120	63	82	65	66	77	62	63	64	0	0	0	0	0	0	0	0	0
YAR030C	1	1	2	7	6	6	0	0	0	0	0	0	2	1	2	0	0	0	0	0	0	3	1	5	0	2	1	2	4	2	3	2	6	4	2	2	1	2	2	0	0	0	0	0	0	0	0	0
YAR031W	34	33	38	46	31	37	6	4	5	13	22	15	3	15	12	12	13	9	0	0	0	13	8	10	43	52	125	78	110	76	139	78	89	80	73	96	58	76	84	7	7	5	3	0	1	6	3	4
YAR033W	17	17	18	46	35	56	2	4	1	0	0	0	12	2	5	0	2	1	6	4	5	28	30	20	17	19	19	22	51	26	42	36	43	32	26	56	34	33	23	11	4	4	1	2	1	3	8	6
YAR035C-A	0	0	0	0	0	0	0	0	0	0	0	0	0	0	0	0	0	0	0	0	0	0	0	1	0	0	0	0	0	0	0	0	0	0	0	1	0	0	0	0	0	0	0	0	0	0	0	0
YAR035W	11	7	11	20	12	18	12	12	28	2	1	0	3	5	4	3	2	3	2	3	7	3	8	9	5	8	6	1	3	3	7	5	5	8	4	2	0	4	1	32	5	29	15	6	2	46	25	41
YAR042W	832	722	745	1103	1028	909	639	665	862	923	655	676	767	726	770	796	825	768	1083	746	837	902	978	1017	272	251	759	619	1051	656	1594	809	644	755	735	961	648	687	707	779	696	702	578	209	197	1016	769	715
YAR047C	0	0	0	3	2	5	0	0	0	0	0	0	0	0	0	0	0	0	0	0	0	0	0	0	0	0	0	0	0	0	0	0	0	0	0	0	0	0	0	0	0	0	4	0	0	0	0	0
YAR050W	76	62	79	37	21	20	120	135	122	13	23	12	103	150	128	19	12	18	37	34	39	38	40	45	12	9	19	267	82	208	82	79	44	90	75	90	76	76	74	118	89	117	25	9	3	105	91	239
YAR053W	0	0	0	3	2	4	0	0	0	0	0	0	0	0	0	0	0	0	0	0	0	0	0	0	0	0	0	1	0	0	0	0	0	0	0	0	0	0	0	0	0	0	0	0	0	0	0	0
YAR060C	0	0	0	0	0	0	0	0	0	0	0	0	0	0	0	0	0	0	0	0	0	0	0	0	0	0	0	0	0	0	0	0	0	0	0	0	0	0	0	0	0	0	0	0	0	0	0	0
YAR061W	0	0	0	0	0	0	0	0	0	0	0	0	0	0	0	0	0	0	0	0	0	0	0	0	0	0	0	0	0	0	0	0	0	0	0	0	0	0	0	0	0	0	0	0	0	0	0	0
YAR062W	0	0	0	0	0	0	0	0	0	0	0	0	0	0	0	0	0	0	0	0	0	0	0	0	0	0	0	0	0	0	0	0	0	0	0	0	0	0	0	0	0	0	0	0	0	0	0	0
YAR064W	0	0	0	0	0	0	3	3	5	0	0	0	1	0	0	0	0	0	0	0	0	0	0	2	0	0	0	0	0	0	0	0	0	0	0	0	0	0	0	0	0	0	0	0	0	0	0	0
YAR066W	0	0	0	0	0	0	0	0	0	0	0	0	3	3	2	0	0	0	0	0	0	2	0	3	0	0	0	0	0	0	0	0	0	0	0	0	0	0	0	2	0	2	0	0	0	0	0	0
YAR068W	21	18	23	0	0	0	4	4	8	8	4	7	1	0	2	6	8	5	6	4	2	204	210	244	0	0	0	57	7	54	10	10	5	13	12	10	6	9	8	0	0	0	0	0	0	0	0	0
YAR069C	0	0	0	0	0	0	0	0	0	0	0	0	0	0	0	0	0	0	0	0	0	0	0	0	0	0	0	0	0	0	0	0	0	0	0	0	0	0	0	0	0	0	0	0	0	0	0	0
YAR070C	0	0	0	0	0	1	0	0	0	0	0	0	0	1	0	0	0	0	0	0	0	0	0	0	0	0	0	0	0	0	0	0	0	0	0	0	0	0	0	0	0	0	0	0	0	0	0	0
YAR071W	31	30	33	250	248	290	14	9	12	9	3	4	91	103	115	3	4	6	11	3	3	40	31	36	0	0	0	0	0	0	0	1	1	0	1	1	0	1	1	22	22	15	0	0	0	24	20	12
YAR073W	3	2	4	2	1	0	0	0	4	10	2	7	5	4	5	6	4	10	0	0	0	4	9	11	0	0	0	0	0	0	1	1	0	1	1	1	1	0	0	5	5	7	0	0	0	4	5	9
YAR075W	0	0	0	0	0	1	0	0	0	0	1	0	0	0	0	0	0	0	0	0	0	0	0	0	0	0	0	0	0	1	0	0	0	0	0	0	0	0	0	0	0	0	0	0	0	0	0	0
YBL001C	353	330	328	523	439	443	340	305	422	519	442	435	299	350	297	401	366	296	319	282	308	409	314	404	74	60	152	230	493	177	424	425	351	272	313	385	316	317	303	322	371	365	501	150	122	347	323	459
YBL002W	3429	3327	3162	3543	3344	3863	3149	2844	3638	4692	4577	4543	2967	2545	2271	3592	3536	3260	3849	3112	3475	2281	2221	2216	1195	991	2865	2702	5565	2744	4632	4439	3163	3422	3979	4159	3703	3919	3366	3414	3761	3709	5149	1927	1786	3146	3146	2372
YBL003C	2029	1942	1825	1983	1752	1930	1959	1701	2123	2706	2271	2298	1715	1661	1284	2024	2047	1601	2343	2134	1973	1489	1476	1416	811	690	1945	1307	2857	1376	2979	2667	2286	1918	2473	2523	1970	2112	1964	1848	2276	1998	3327	973	969	2054	2033	1693
YBL004W	8650	7881	8517	8339	6791	8039	6870	7915	8331	10620	9075	8646	7430	7221	8784	8274	9143	11031	7997	8298	8091	8884	8646	9479	3731	3377	10042	9264	11198	7602	13019	9281	7196	10325	8494	11649	8244	9210	8476	9016	8588	9445	7957	2787	2614	9784	8186	8328
YBL005W	305	274	285	393	375	371	186	185	230	423	401	375	197	195	252	357	359	331	322	210	256	350	296	297	109	113	303	331	493	297	505	342	266	350	275	447	282	340	330	203	221	231	330	121	122	232	190	170
YBL005W-A	0	0	0	0	0	0	0	0	0	0	0	0	0	0	0	0	0	0	0	0	0	0	0	0	0	0	0	0	0	0	0	0	0	0	0	0	0	0	0	0	0	0	0	0	0	0	0	0
YBL005W-B	28	20	26	69	52	78	0	0	0	0	0	0	0	0	0	0	0	0	262	152	197	61	55	59	9	15	21	0	0	0	0	0	0	0	0	0	0	0	0	9	13	17	1	0	4	11	12	21
YBL006C	178	161	177	246	210	227	139	107	186	260	192	217	134	131	135	215	213	187	144	125	128	127	159	195	58	47	159	121	254	201	338	206	237	173	195	222	154	190	182	180	116	158	185	76	67	203	201	147
YBL006W-A	0	0	0	1	2	0	0	0	2	1	0	2	1	0	0	1	0	0	0	0	0	2	0	0	0	0	0	0	1	0	0	0	0	1	0	0	0	0	0	0	1	0	0	0	0	0	0	0
YBL007C	2372	2126	2242	4295	3757	3745	2182	2133	2747	2555	2377	2184	2399	2216	2797	2404	2537	2114	1901	1706	2066	1994	2196	2180	765	831	2388	1898	2609	1988	4121	2218	1601	1917	1723	2443	1536	1781	1934	2552	2474	2542	2115	820	835	2942	2515	2061
YBL008W	342	301	308	415	339	362	265	257	333	380	345	312	290	272	319	407	404	325	384	341	383	291	344	303	120	138	356	237	423	247	643	297	280	326	293	386	262	278	298	349	311	326	294	125	108	462	352	289
YBL008W-A	1	0	0	0	1	0	0	0	0	2	1	0	0	0	0	0	1	1	0	0	0	1	0	0	0	0	0	0	0	1	2	0	0	0	0	0	0	0	0	1	2	1	3	0	0	1	0	0
YBL009W	550	493	497	489	428	446	519	460	604	601	545	512	520	424	509	570	602	505	462	438	485	545	517	506	214	185	494	494	743	468	902	650	444	575	487	670	543	548	478	611	591	662	553	199	190	655	582	487
YBL010C	101	98	92	111	107	113	77	65	60	111	109	86	82	73	90	111	98	67	91	92	118	116	109	87	40	31	109	81	161	92	169	126	102	117	115	137	104	117	110	102	116	89	90	45	35	109	107	84
YBL011W	1040	930	955	1167	1124	1074	928	827	998	1116	1070	1017	786	799	889	1079	1064	848	1248	940	1074	827	835	904	402	468	1038	900	1510	917	1990	1069	949	963	864	1174	849	854	894	1111	1072	1144	925	336	354	1310	1111	1047
YBL012C	1	1	0	0	0	0	0	0	0	0	0	0	0	0	0	0	2	0	2	2	0	1	1	2	0	0	0	0	1	0	2	0	0	0	1	0	0	2	0	2	0	2	0	1	0	1	1	0
YBL013W	27	24	25	49	34	40	10	11	25	46	35	51	23	37	27	32	59	37	28	35	22	10	10	6	21	6	46	14	22	16	58	27	19	20	16	19	13	10	11	24	13	24	24	8	18	29	30	20
YBL014C	546	456	493	636	536	496	404	355	486	688	621	579	471	399	489	728	647	688	534	508	516	544	472	553	219	200	568	461	551	423	920	456	358	533	464	625	472	457	457	500	488	508	499	192	182	579	494	472
YBL015W	189	186	167	350	302	294	168	141	167	232	153	155	145	163	132	169	213	136	145	192	247	132	121	129	37	58	147	91	434	111	471	267	181	200	194	250	157	210	184	126	123	143	246	75	80	171	140	145
YBL016W	1	2	2	3	2	7	2	0	3	0	1	3	1	1	1	0	4	2	0	1	3	1	7	1	1	0	1	0	2	1	5	1	1	1	1	1	1	1	0	0	1	3	1	0	0	2	2	4
YBL017C	2401	2233	2325	3176	2835	3307	2134	2328	2641	3374	2982	2746	2242	2016	2467	2432	2604	2468	2575	1858	2132	2454	2481	2404	929	950	2483	1731	3002	1648	3112	2444	1900	2115	1960	2634	1781	2050	2125	2607	2450	2662	2621	972	1060	2739	2558	2201
YBL018C	156	147	148	170	151	155	131	143	172	155	131	135	132	154	130	119	108	121	150	119	147	191	149	178	71	50	120	105	246	103	203	174	155	142	169	208	163	142	147	218	216	210	175	47	61	218	200	185
YBL019W	93	95	89	113	117	120	82	63	79	134	123	96	59	61	68	102	130	102	108	106	119	127	119	132	48	52	101	57	152	63	164	91	70	81	87	118	64	94	76	88	96	84	85	45	20	89	88	81
YBL020W	754	745	756	702	611	764	518	578	661	927	911	857	617	599	697	663	729	731	672	694	740	629	605	576	296	324	742	802	1529	667	1344	1070	926	963	885	1179	842	913	956	782	777	820	758	320	321	800	636	705
YBL021C	64	58	53	81	73	69	37	39	56	61	49	51	48	45	52	59	47	35	101	66	57	53	39	42	18	18	52	50	138	42	129	92	84	51	62	69	65	62	58	57	49	52	79	32	18	77	60	60
YBL022C	2069	1780	1831	3061	2728	2452	1473	1436	1923	2008	1764	1699	1803	1493	2168	1896	1965	1428	2930	1759	2432	2207	2286	2268	765	950	2458	1151	2313	1140	3691	1645	1113	1560	1554	2076	1339	1501	1527	2188	2274	2054	1980	839	869	2979	2198	1862
YBL023C	612	535	561	789	645	666	428	490	641	691	578	548	526	519	564	684	717	613	548	581	631	674	617	679	188	180	530	475	724	454	1149	545	425	578	474	794	509	506	548	631	585	540	538	210	181	774	657	599
YBL024W	2898	2589	2717	2858	2499	2608	2477	2321	2713	3259	2873	2589	2726	2432	2859	3336	3506	3230	2398	2864	2974	2443	2350	2469	1158	1102	3235	2655	3675	2613	5185	2810	2396	3416	3099	4067	2859	3004	2942	2710	2367	2449	2685	1144	936	3300	2787	2681
YBL025W	54	50	48	72	43	76	58	48	58	64	57	58	53	52	56	70	57	32	63	43	54	53	50	44	15	21	37	34	85	38	61	58	34	45	46	67	37	63	62	63	49	38	51	15	22	75	62	49
YBL026W	610	569	591	553	480	588	586	476	582	675	612	587	483	517	488	579	536	527	542	534	582	674	489	565	194	206	572	580	1030	405	806	776	728	659	627	928	682	595	674	552	766	754	912	236	247	673	656	640
YBL027W	18927	18091	18803	16330	15300	16712	17520	15216	19744	20442	19929	18874	17061	17644	17468	18984	17529	15339	14044	15686	17496	14684	11460	13898	7729	6891	16372	20884	32767	21029	33546	25346	25292	21115	23332	29619	21205	20032	23347	18845	20250	19626	20309	8756	7568	21206	21224	19665
YBL028C	706	645	664	521	475	524	369	321	394	815	670	697	677	581	449	751	630	653	495	618	587	768	589	749	200	135	548	765	1183	643	1106	1012	910	845	847	1126	811	766	807	726	870	855	936	171	213	798	809	801
YBL029C-A	58	59	58	103	106	114	31	33	44	56	57	45	48	64	63	44	53	43	33	43	62	96	63	86	22	16	46	33	111	38	77	64	45	54	56	54	55	44	50	71	78	65	95	29	30	58	69	81
YBL029W	132	124	128	125	127	140	182	162	198	141	167	134	150	154	107	136	114	103	22	60	62	222	235	270	48	39	87	87	176	112	258	124	141	129	112	167	103	117	122	105	91	85	185	85	70	94	91	124
YBL030C	4613	4972	4385	3122	2670	3065	1759	1898	2366	4744	3978	4083	1890	2147	2266	3711	3892	2698	2429	5138	5681	4544	4355	4275	2336	2563	5295	3265	12406	3082	12495	9501	6382	6684	7377	8330	6201	6724	6728	4276	4769	4779	7006	2981	2874	4726	4181	3864
YBL031W	139	123	122	164	152	171	131	98	146	170	166	156	148	114	134	140	162	134	108	110	110	157	122	118	34	38	114	100	186	125	254	135	91	145	127	174	118	109	117	171	167	120	105	45	34	141	120	92
YBL032W	771	671	716	1242	1145	1139	644	627	813	915	741	775	664	607	757	878	919	800	734	581	726	458	466	427	268	214	694	626	901	717	1453	882	668	752	725	895	598	641	669	650	612	696	755	236	260	926	767	703
YBL033C	274	251	257	272	268	225	243	228	342	281	241	253	289	300	328	283	279	223	252	243	314	262	247	248	86	100	250	190	319	245	479	253	187	261	264	267	190	279	206	358	264	337	219	120	76	438	366	353
YBL034C	592	538	548	789	661	690	492	446	582	718	656	628	557	430	569	612	628	555	586	479	569	654	646	616	209	240	689	502	792	469	824	547	409	573	586	712	503	633	493	584	549	544	695	229	251	586	544	445
YBL035C	417	357	380	476	419	444	398	370	514	419	334	372	524	398	473	411	457	381	323	326	399	339	380	369	143	121	436	324	439	308	800	353	282	321	326	460	262	350	331	476	478	427	421	146	135	618	455	376
YBL036C	516	494	512	592	523	619	450	491	553	724	661	592	407	422	442	557	550	500	475	446	425	571	459	514	206	174	483	510	765	379	676	543	541	496	450	692	389	477	531	606	633	622	479	177	145	608	644	647
YBL037W	493	451	466	661	574	560	389	437	559	568	586	528	402	407	481	626	589	518	432	358	413	476	474	488	141	155	402	414	650	390	890	500	422	420	391	566	346	402	451	545	568	589	530	160	185	558	509	439
YBL038W	384	376	346	225	221	208	233	232	283	368	347	346	234	206	211	290	302	195	583	335	355	352	275	291	183	173	485	198	772	181	644	575	513	388	440	566	406	376	402	482	629	491	581	245	189	589	509	475
YBL039C	5312	4941	5154	4240	3476	3951	5233	5178	5436	5430	5096	4259	4987	4768	5018	4952	4936	5025	3388	4753	4104	6244	5385	5795	1988	1748	4838	6825	8335	6965	9559	6538	5413	6562	6349	8527	5600	5857	6534	5011	4629	4608	4309	1799	1519	5351	5272	5320
YBL039C-A	0	0	0	0	0	0	0	0	0	0	0	0	0	0	0	0	0	0	0	0	0	0	0	0	0	0	0	0	0	0	0	0	0	0	0	0	0	0	0	0	0	0	0	0	0	0	0	0
YBL039W-B	26	27	27	37	43	44	30	38	38	34	35	31	24	35	23	39	25	23	28	30	21	41	24	31	9	13	31	11	28	17	21	23	24	8	18	24	17	14	19	24	35	32	46	5	10	24	44	36
YBL040C	515	491	506	595	594	663	426	391	523	707	682	634	405	458	448	491	505	423	504	353	410	618	540	568	212	195	544	465	769	455	732	616	517	409	476	572	427	480	519	540	590	529	643	208	229	554	508	552
YBL041W	850	805	834	954	934	1011	739	711	920	1022	899	861	846	888	867	854	723	631	896	689	802	1142	965	1037	274	329	766	750	1365	832	1234	910	799	714	735	1030	749	794	853	869	908	883	734	317	336	969	902	875
YBL042C	788	762	826	1034	808	1063	630	632	715	1046	886	832	590	727	765	782	776	829	648	829	911	502	487	545	446	422	1004	985	1242	916	1145	946	691	696	788	1159	636	811	919	1016	895	945	690	238	211	975	939	878
YBL043W	20	14	15	33	28	33	13	11	17	41	18	27	18	9	17	21	35	22	65	21	23	22	19	21	7	9	12	7	11	5	20	7	6	7	9	6	9	9	7	14	13	14	11	5	5	11	12	16
YBL044W	1	1	1	1	1	1	2	0	1	1	1	0	1	2	2	2	1	0	0	0	1	1	0	0	1	0	4	0	1	2	2	1	1	0	0	1	1	0	2	0	0	0	2	1	3	1	1	2
YBL045C	2259	2223	2041	1533	1313	1302	1184	1079	1366	2194	1923	1879	1323	1250	1587	2087	2322	1638	1165	2494	2921	1673	1520	1584	926	1090	2705	1491	5154	1496	6369	3551	2353	3398	3327	3984	2998	3090	2910	2097	1927	2089	2797	1231	1104	2652	2072	1695
YBL046W	115	108	111	159	149	137	125	118	154	144	115	91	108	147	106	135	116	105	103	101	116	91	103	93	65	43	143	81	137	87	186	121	123	125	102	150	76	116	117	86	80	92	118	51	56	116	121	99
YBL047C	2776	2638	2775	3748	3436	4297	1995	2166	2583	3582	3534	3205	2215	2154	2521	2381	2656	2704	3136	2135	2805	2894	2837	2874	1154	1166	3036	2483	4198	2156	3922	3049	2454	2690	2288	3345	2247	2681	2652	3009	3342	3108	3167	1191	1228	3024	2740	2664
YBL048W	2	1	1	2	0	2	3	0	0	2	1	2	1	1	0	1	2	2	1	0	2	7	5	5	0	0	1	1	3	0	2	2	1	1	1	0	0	1	1	1	2	1	1	0	2	1	1	1
YBL049W	3	3	4	2	4	4	1	1	0	8	3	3	1	4	1	2	5	4	8	4	3	5	7	13	2	1	5	2	4	0	5	0	5	0	1	2	1	1	1	4	2	6	6	0	1	1	2	14
YBL050W	487	471	480	586	538	618	369	414	502	542	475	495	402	431	404	440	463	359	661	448	494	641	543	629	184	221	500	387	800	356	717	581	598	424	449	601	439	435	484	465	553	492	585	220	212	469	495	461
YBL051C	738	621	654	1063	1000	1000	566	525	710	796	682	633	662	612	686	738	746	718	1009	471	550	676	634	616	234	227	689	551	893	608	1288	635	571	743	629	894	575	662	647	729	709	629	611	199	209	836	688	643
YBL052C	388	356	349	520	477	438	361	345	411	416	391	336	371	315	396	407	449	402	354	297	371	365	318	318	125	120	353	291	531	251	651	386	304	419	364	455	337	410	331	430	392	375	304	103	108	469	448	383
YBL053W	6	4	4	1	5	2	3	4	3	8	6	8	4	5	3	12	11	6	3	6	1	9	2	2	2	0	4	5	1	5	7	3	1	10	8	9	2	7	3	8	2	8	9	2	2	8	4	4
YBL054W	716	630	614	588	405	390	626	598	645	868	715	537	713	653	718	920	906	788	709	895	768	546	602	525	338	275	662	636	759	630	1263	711	393	839	703	976	694	713	729	659	633	599	548	199	221	791	679	628
YBL055C	390	368	388	350	274	292	353	385	404	405	417	346	405	407	403	353	382	305	430	388	366	301	269	359	125	119	291	505	642	463	583	485	501	443	387	565	393	398	472	430	406	444	336	136	129	432	426	487
YBL056W	1355	1231	1275	1655	1420	1434	1095	1051	1306	1702	1552	1501	1108	1085	1145	1544	1605	1372	1715	1191	1395	1235	1121	1239	504	468	1259	930	1969	1009	2105	1382	1246	1292	1235	1725	1267	1173	1277	1287	1283	1312	1435	588	614	1456	1338	1292
YBL057C	376	359	375	412	380	379	314	293	332	465	475	482	322	321	317	388	372	319	370	326	325	424	368	373	184	139	361	337	563	359	565	448	500	366	369	538	389	325	422	348	422	371	387	139	145	367	448	409
YBL058W	840	785	823	1348	1241	1373	668	713	962	875	856	800	933	802	966	751	803	634	802	729	911	772	799	755	217	326	908	620	1134	606	1318	738	647	709	651	948	650	705	717	1035	932	894	778	325	336	1129	1022	895
YBL059C-A	133	129	121	105	83	105	87	71	101	161	131	112	92	72	76	92	85	75	202	97	138	145	88	127	24	26	66	64	316	87	262	222	189	128	156	190	139	139	161	144	227	164	176	37	64	176	182	165
YBL059W	59	64	54	70	71	63	42	54	42	55	40	73	52	56	57	52	58	22	61	62	54	65	66	69	7	10	20	38	139	39	117	82	74	52	98	60	57	60	65	66	68	67	78	27	25	79	72	73
YBL060W	150	138	137	169	139	151	133	150	144	216	168	128	144	127	149	170	184	135	145	128	130	188	150	175	75	65	182	111	176	99	213	143	106	103	133	188	113	135	138	162	143	142	126	57	44	176	167	145
YBL061C	780	692	737	814	709	702	565	530	708	958	833	749	644	565	658	902	955	865	722	666	808	928	841	850	290	262	858	754	1025	801	1420	843	619	841	834	1082	740	796	833	694	617	659	614	223	179	817	682	684
YBL062W	4	4	2	2	4	5	1	2	0	7	5	7	2	3	0	7	4	5	2	3	3	4	5	3	5	1	2	1	7	2	13	9	1	5	2	2	8	7	3	2	2	1	2	3	1	3	4	2
YBL063W	281	261	250	448	429	381	219	233	331	316	323	274	297	233	271	314	351	297	291	243	295	257	234	213	55	78	218	180	360	183	450	261	149	288	248	324	209	286	231	304	275	278	273	107	104	319	247	202
YBL064C	175	164	163	288	244	266	112	102	156	219	176	191	66	115	98	174	156	88	259	142	166	302	228	267	48	79	200	129	321	127	265	207	152	110	161	209	127	155	144	161	160	132	199	66	81	171	147	164
YBL065W	0	0	0	0	0	0	0	0	0	2	0	0	0	0	0	0	0	0	1	1	1	1	2	3	0	0	0	0	1	0	0	0	0	0	0	0	0	0	1	1	0	0	0	0	0	2	0	0
YBL066C	373	351	347	337	332	319	260	264	349	476	345	356	260	267	291	351	393	370	310	346	377	371	333	341	166	161	461	282	611	283	756	532	312	404	422	525	377	414	399	363	342	367	469	156	161	409	342	297
YBL067C	1001	934	954	1086	909	1027	775	802	910	1186	1087	1098	940	796	937	1050	1009	921	834	848	893	1086	972	981	310	372	920	905	1589	896	1569	1167	935	1099	1017	1393	929	975	1081	975	980	1004	1127	374	362	1145	1117	946
YBL068W	652	651	640	608	519	623	524	561	659	695	659	570	617	665	607	638	652	516	518	676	658	669	633	624	285	293	670	649	1062	732	1110	878	679	603	773	953	735	675	739	653	678	638	759	302	282	715	746	655
YBL068W-A	0	0	0	0	0	0	0	0	0	0	0	0	0	0	0	0	0	0	0	0	0	0	0	0	0	0	0	0	0	0	0	0	0	0	0	0	0	0	0	0	0	0	0	0	0	0	0	0
YBL069W	233	183	187	370	320	230	148	152	192	246	200	209	183	162	153	336	262	211	166	166	195	156	130	142	87	56	232	197	264	187	543	213	206	180	167	259	165	170	188	158	187	163	311	107	90	255	189	146
YBL070C	1	1	1	1	1	1	1	0	1	1	0	0	0	0	0	1	0	0	0	1	1	1	4	6	2	1	0	1	3	1	1	1	0	0	1	0	1	1	0	0	0	1	1	2	0	0	0	0
YBL071C	1	1	2	6	2	0	0	0	2	0	0	3	2	2	0	1	3	2	0	0	0	1	2	2	0	0	2	2	4	3	2	2	6	2	0	2	4	0	3	2	1	0	0	1	1	0	1	2
YBL071C-B	3	4	3	4	3	4	3	4	3	3	2	0	4	7	2	3	2	2	3	2	2	5	4	3	1	1	3	4	3	6	3	6	4	5	8	7	4	4	4	3	3	4	3	1	1	2	3	0
YBL071W-A	167	150	154	128	106	118	138	131	155	217	203	222	132	146	140	188	193	176	92	120	132	176	152	187	41	36	92	185	237	222	325	179	97	199	202	245	162	175	176	177	126	151	135	60	43	210	185	149
YBL072C	8151	7965	7999	7797	7198	7683	7061	7412	8416	8844	8648	8467	8147	8335	7996	7851	8152	6717	7263	7769	7968	7323	5986	6862	2905	2774	8029	7953	13123	9066	13980	10699	9002	8808	9029	11042	8258	8700	8667	8127	9181	9166	9023	2875	2837	8918	9599	8067
YBL073W	0	0	0	0	0	0	0	1	0	0	0	0	0	0	0	0	0	0	0	1	0	0	0	1	0	0	0	0	0	0	0	0	0	0	0	0	0	0	0	0	0	0	0	0	0	0	0	0
YBL074C	98	91	92	125	119	109	60	92	85	135	117	113	77	65	83	132	124	120	89	60	88	126	97	109	36	38	128	64	142	66	155	88	74	93	104	95	79	82	95	91	86	72	100	32	42	113	114	107
YBL075C	177	166	171	247	217	250	122	145	169	233	207	187	164	140	176	202	198	196	177	123	176	249	239	244	69	77	239	107	212	120	246	171	112	164	142	187	115	176	139	172	180	143	161	75	55	220	188	167
YBL076C	14131	12976	13562	19294	17270	19006	13003	12723	14993	14108	13690	12569	12331	11338	13114	12187	13141	12645	14223	12760	13924	13333	12271	12714	4884	4846	12806	13904	19287	13937	22543	14830	12496	14508	13297	17446	12555	13560	13548	15989	15632	15512	11756	4343	4239	17350	15652	14477
YBL077W	1	1	1	1	0	1	1	1	4	0	0	0	0	1	2	0	0	0	1	1	0	1	0	1	0	0	0	0	0	2	2	1	0	1	0	0	1	2	1	1	1	0	0	0	0	0	1	0
YBL078C	26	23	24	38	33	27	17	12	22	30	24	39	20	21	24	21	26	25	48	26	39	51	38	35	6	9	32	12	50	14	28	38	29	23	17	25	21	18	13	11	11	10	44	9	7	15	15	26
YBL079W	2691	2366	2517	3098	2654	2820	1988	2078	2659	3277	2919	2875	2127	1968	2512	2956	3071	2910	2815	2434	2735	2642	2474	2610	1099	1058	2999	2477	3408	2249	4464	2655	1958	2838	2377	3347	2332	2666	2508	2633	2386	2482	2687	908	960	2928	2440	2132
YBL080C	117	107	105	114	112	109	77	68	87	128	131	108	66	69	75	112	110	89	167	98	124	106	84	79	58	48	137	73	217	83	213	121	122	96	126	166	122	114	121	151	122	105	127	57	49	142	130	119
YBL081W	324	311	336	255	236	290	258	222	315	388	388	410	312	272	349	306	313	354	264	275	308	259	332	268	130	104	295	386	505	347	482	411	291	407	385	544	350	385	387	375	379	415	330	118	89	357	336	373
YBL082C	282	261	280	287	219	271	235	238	279	362	224	311	242	266	233	282	271	262	187	209	190	168	218	278	94	75	190	275	406	374	577	427	409	334	340	335	210	314	292	296	254	340	330	135	102	358	316	333
YBL083C	2	2	2	1	1	0	0	2	1	4	3	1	5	5	1	5	2	0	1	6	1	2	3	1	1	1	0	2	1	4	2	2	4	2	3	3	0	4	4	1	3	2	2	0	0	3	1	2
YBL084C	264	251	257	271	258	262	230	218	261	310	311	276	219	232	269	258	280	262	265	227	249	256	264	302	119	107	275	249	432	231	440	320	236	291	275	342	227	266	268	275	246	274	263	106	95	285	225	260
YBL085W	804	743	757	863	870	923	647	635	811	1005	1013	920	665	559	686	894	963	881	770	628	827	716	688	671	258	281	764	690	1173	667	1321	841	619	938	780	1089	780	891	783	816	748	752	768	318	306	926	750	656
YBL086C	165	156	157	186	165	194	100	94	125	173	152	134	159	181	161	154	148	141	168	122	131	263	217	236	47	57	135	144	322	140	308	188	169	217	179	261	167	193	204	134	143	128	89	47	30	172	137	172
YBL087C	6871	6660	6873	5981	5789	6388	6830	5923	7741	6217	5856	6176	6864	7611	6605	5269	5039	4219	5169	5795	5977	5363	4279	5329	2658	2407	5618	7698	11489	8469	12651	10231	9474	7406	8825	10585	7553	7420	8465	7340	7933	7648	7773	2656	2584	8292	8652	7822
YBL088C	897	812	829	1118	996	965	658	673	783	1122	1015	993	691	666	855	873	1074	949	979	725	909	1143	1036	1060	286	386	977	754	1225	654	1458	924	677	921	791	1053	795	899	809	810	780	825	930	294	317	914	700	615
YBL089W	170	164	163	232	174	188	140	131	173	223	207	174	126	130	97	161	185	152	151	117	108	207	174	208	72	62	165	155	334	147	226	207	195	175	183	240	138	156	184	164	178	181	199	68	67	175	161	159
YBL090W	398	368	344	242	205	217	254	228	255	343	373	329	214	256	237	359	319	253	764	319	390	345	268	355	120	131	318	222	797	205	688	577	534	406	366	490	432	355	417	471	602	505	588	191	164	518	534	491
YBL091C	1014	931	934	1498	1344	1413	801	796	895	1244	1072	946	900	844	892	1038	1067	924	911	806	923	831	817	814	327	270	930	798	1444	852	1688	1090	837	1062	1028	1370	923	1024	1091	1025	891	849	1018	423	323	1140	1052	953
YBL091C-A	39	36	36	74	44	51	30	34	38	67	48	58	35	26	41	47	55	41	44	40	34	45	28	54	15	11	29	10	65	17	54	25	34	31	31	45	30	35	31	26	36	30	29	16	7	54	45	31
YBL092W	21987	21078	22052	20044	18205	21062	19572	18717	23433	24806	23326	23734	20042	21599	20581	20822	19508	17741	17831	20123	21125	18934	14904	18907	8527	7489	20861	24619	36240	23393	35212	30777	28456	24841	25233	31975	23841	23191	25245	21691	23996	23581	25145	8400	7976	23882	24459	22712
YBL093C	360	314	351	363	253	382	276	286	318	438	370	321	308	287	288	364	306	313	383	303	309	322	290	347	154	139	383	337	506	335	513	401	431	365	340	495	343	342	368	321	342	355	542	200	194	367	350	427
YBL094C	3	3	4	4	5	7	0	1	4	3	3	5	5	1	2	1	2	2	4	4	8	1	3	2	3	4	3	1	6	3	3	4	2	5	2	3	6	7	1	3	4	9	5	1	1	8	4	1
YBL095W	191	176	175	143	143	168	173	182	217	328	256	254	137	187	143	267	244	224	160	118	152	234	211	213	64	54	176	118	257	109	270	195	139	143	165	236	127	150	168	199	167	178	268	92	100	239	219	153
YBL096C	2	2	1	1	1	1	1	0	0	2	2	0	4	3	2	5	2	2	1	0	0	0	2	1	1	0	5	3	4	0	3	2	2	1	5	1	3	2	4	1	1	2	1	0	0	1	3	2
YBL097W	115	102	110	185	166	205	102	87	124	175	110	102	87	83	119	116	125	126	128	111	106	123	91	108	44	28	129	58	118	55	161	114	76	96	103	167	78	153	97	129	94	90	106	45	35	134	103	107
YBL098W	324	317	323	235	213	254	640	602	810	236	222	182	201	172	182	192	229	137	251	434	528	857	738	815	72	67	198	165	512	162	516	378	310	345	314	418	323	283	325	233	236	238	365	127	105	233	224	187
YBL099W	6269	6544	6026	5032	4237	4589	3501	3632	4340	6678	5601	5852	3557	3733	4151	5217	5369	4139	2654	6890	7656	4671	4808	4837	2623	2711	6384	4585	15387	4320	16684	11586	8971	9255	9388	10838	8642	8863	8807	6028	6435	6819	8049	3497	3240	6860	6030	5445
YBL100C	1	1	0	0	0	1	0	0	1	2	0	1	1	1	0	1	1	0	1	0	0	2	0	0	0	0	1	0	1	0	3	3	0	1	1	1	0	1	0	0	0	0	1	1	0	1	0	0
YBL100W-A	0	0	0	0	0	0	0	0	0	0	0	0	0	0	0	0	0	0	0	0	0	0	0	0	0	0	0	0	0	0	0	0	0	0	0	0	0	0	0	0	0	0	0	0	0	0	0	0
YBL100W-B	132	121	139	21	39	24	15	17	21	1	0	0	1	4	3	2	0	0	0	0	0	56	56	56	2	0	3	1	1	2	0	1	2	6	0	3	3	2	0	923	861	844	14	8	8	941	819	1112
YBL100W-C	0	0	0	0	0	0	0	0	0	1	1	0	0	0	0	0	1	0	1	0	0	2	0	2	1	0	1	0	0	0	0	0	0	1	0	0	0	0	0	0	0	0	1	0	0	0	3	0
YBL101C	366	331	347	642	597	652	274	293	311	433	395	383	384	373	412	421	378	330	389	331	401	425	411	441	97	121	357	195	380	249	526	292	212	256	255	370	225	278	309	396	340	340	416	156	139	406	370	293
YBL102W	293	275	285	435	398	459	286	275	297	250	267	261	244	291	303	179	196	151	342	212	286	312	311	300	134	137	304	235	453	221	409	346	294	276	242	334	275	197	271	274	330	324	390	137	150	351	334	325
YBL103C	220	191	197	266	253	232	201	171	190	245	213	178	212	188	212	218	222	190	211	181	207	274	197	231	70	65	187	168	290	189	332	191	156	224	198	281	173	170	187	242	196	202	220	98	93	240	234	217
YBL104C	438	386	385	669	489	419	335	334	426	503	421	432	358	347	445	552	568	447	406	378	374	447	494	423	154	146	421	299	514	322	787	383	291	387	363	474	329	330	366	408	393	403	392	139	151	549	484	377
YBL105C	1015	912	948	1249	1073	1173	783	800	916	1208	995	955	972	834	978	1139	1194	1097	1001	863	1011	954	959	952	391	477	1185	815	1189	768	1724	1093	812	1006	921	1216	846	972	925	917	948	982	1024	353	357	1201	1002	900
YBL106C	216	202	212	258	212	270	167	164	218	224	190	196	193	148	231	186	188	193	168	142	208	236	247	259	79	103	216	232	332	194	376	274	183	263	232	289	236	264	237	239	242	239	134	47	45	247	239	195
YBL107C	168	160	155	139	144	133	109	122	154	306	212	205	173	175	157	211	193	169	245	142	149	168	140	154	29	23	116	95	274	111	209	186	157	152	126	195	112	127	155	184	274	193	167	50	49	225	207	221
YBL107W-A	0	0	0	0	0	0	0	0	0	0	0	0	0	0	0	0	0	0	0	0	0	0	0	0	0	0	0	0	0	0	0	0	0	0	0	0	0	0	0	0	0	0	0	0	0	0	0	0
YBL108C-A	1	1	1	0	0	0	8	7	14	0	0	0	0	1	0	0	0	0	0	0	0	0	1	0	0	0	1	0	0	0	0	0	0	0	0	0	0	0	0	0	0	0	2	0	0	0	0	2
YBL108W	0	0	0	0	0	0	0	0	0	0	0	0	4	3	1	0	0	0	0	0	0	0	0	0	0	0	0	0	0	0	0	0	0	0	0	0	0	0	0	0	0	0	0	0	0	0	0	0
YBL109W	0	0	0	1	0	0	0	0	0	1	0	0	0	0	0	0	1	0	0	0	0	0	0	0	0	0	0	0	0	1	0	0	0	0	0	0	0	0	0	0	1	0	0	0	0	0	0	0
YBL111C	0	0	0	0	0	0	0	0	0	0	0	0	0	0	0	0	0	0	0	0	0	0	0	0	0	0	0	0	0	0	0	0	0	0	0	0	0	0	0	0	0	0	0	0	0	0	0	0
YBL112C	0	0	0	0	0	0	0	0	0	0	0	0	0	0	0	0	0	0	0	0	0	0	0	0	0	0	0	0	0	0	0	0	0	0	0	0	0	0	0	0	0	0	0	0	0	0	0	0
YBL113C	12	8	9	32	15	21	3	5	6	28	13	19	11	11	16	28	23	14	3	5	3	2	2	5	0	2	0	0	1	0	2	2	2	1	1	5	1	2	2	29	14	21	10	2	3	25	25	18
YBL113W-A	0	0	0	0	0	0	0	0	0	0	0	0	0	0	0	0	0	0	0	0	0	0	0	0	0	0	0	0	0	0	0	0	0	0	0	0	0	0	0	1	0	0	0	0	0	0	0	0
YBR001C	108	105	101	432	428	393	48	80	107	55	38	53	61	46	63	47	42	24	195	122	139	171	157	130	55	55	142	37	127	38	158	96	66	60	88	106	60	83	64	42	65	52	116	48	59	90	97	78
YBR002C	356	320	328	288	273	253	302	270	337	435	384	309	348	317	309	455	384	384	362	323	305	372	323	345	127	95	338	368	569	314	536	348	342	388	358	531	363	374	402	360	312	305	244	137	96	388	337	353
YBR003W	492	443	442	433	373	412	269	253	319	579	529	502	295	281	328	482	472	366	786	472	541	525	471	528	223	207	637	285	804	296	850	493	447	503	444	605	407	496	436	568	569	483	513	244	230	668	540	502
YBR004C	505	497	514	400	341	408	426	467	521	560	516	534	405	462	385	458	410	423	607	393	448	436	440	538	241	194	598	513	1131	519	854	670	582	615	601	796	525	588	623	534	549	551	518	186	176	490	511	614
YBR005W	189	201	194	206	196	189	146	194	202	206	179	181	170	275	168	178	154	139	136	116	174	68	81	101	103	74	198	158	511	262	425	262	248	261	302	306	248	259	262	172	150	156	132	71	45	232	197	282
YBR006W	80	85	73	118	103	93	48	80	82	98	114	94	64	105	80	99	88	66	68	54	42	79	85	91	24	25	62	33	172	36	144	76	94	68	76	89	70	72	61	71	83	78	125	57	52	92	78	78
YBR007C	193	170	178	269	254	228	162	135	205	208	220	222	179	147	171	250	246	187	208	175	221	218	187	187	70	60	176	136	226	142	303	165	169	171	171	192	141	163	154	196	164	183	144	59	40	244	183	194
YBR008C	164	156	151	165	162	167	225	190	283	221	225	212	136	145	132	220	230	162	190	155	151	163	198	176	30	30	46	107	182	110	279	164	129	107	122	162	111	131	125	181	170	189	152	72	70	177	160	149
YBR009C	2419	2375	2204	3006	2984	3013	2053	1886	2501	3002	2768	2713	2315	1850	1452	2375	2448	1925	3022	2305	2356	2244	2178	2183	897	776	2230	1691	3799	1779	3560	3375	2291	2312	2826	3136	2445	2750	2513	2216	2597	2349	2767	840	835	2374	2246	1779
YBR010W	4212	4085	3936	3711	3524	3551	3344	3112	4136	6313	6013	6075	3650	3284	2525	5081	5195	4388	4367	4326	4672	3288	3100	3430	1372	1261	3677	2947	6142	3259	6602	5010	3906	4594	5174	5716	4480	4903	4342	4243	4411	4425	4902	1715	1699	4286	4108	3235
YBR011C	9053	8460	8677	9403	8789	9459	9061	8578	10630	10364	10297	9093	8901	8536	9253	9000	8834	8301	9114	8362	8861	7775	7068	7127	2888	2831	7954	8406	13885	8729	14729	9933	8262	9841	9359	12943	9268	8952	9583	9388	8618	8578	7527	3143	2730	10130	9719	8655
YBR012C	34	36	32	13	20	10	22	33	20	50	32	54	33	40	31	40	34	30	33	16	26	31	42	48	5	6	16	39	106	34	90	69	49	45	48	77	36	51	49	8	15	9	47	13	12	13	12	17
YBR012W-A	0	0	0	0	0	0	0	0	0	0	0	0	0	0	0	0	0	0	0	0	0	0	0	0	0	0	0	0	0	0	0	0	0	0	0	0	0	0	0	0	0	0	0	0	0	0	0	0
YBR012W-B	25	21	28	51	43	55	29	26	23	0	0	0	0	0	0	0	0	0	63	97	82	88	88	103	42	36	128	0	0	0	0	0	0	0	0	0	0	0	0	0	0	0	100	25	31	0	0	0
YBR013C	32	33	33	93	75	78	13	23	20	46	34	38	14	26	26	23	19	21	21	19	15	25	31	34	6	9	17	40	68	29	61	58	64	36	53	80	32	43	46	8	12	12	44	20	10	11	10	9
YBR014C	181	181	176	247	223	284	165	172	183	199	216	203	149	167	164	184	147	150	206	153	184	262	236	224	78	99	164	132	309	105	231	208	174	152	158	195	140	153	168	166	212	171	227	95	86	179	163	182
YBR015C	1793	1660	1739	1931	1738	1935	1677	1543	2022	2280	2243	2094	1808	1627	1776	1939	2057	2049	1533	1386	1587	1561	1562	1661	647	658	1737	1667	2584	1748	3061	2076	1537	1832	1690	2237	1504	1734	1802	1791	1792	1742	1707	556	546	1959	1650	1612
YBR016W	187	159	170	201	200	224	164	164	269	311	167	227	222	189	188	273	272	257	141	115	117	75	120	116	62	34	87	97	175	196	331	198	137	140	151	181	129	162	157	189	134	180	203	77	61	268	227	159
YBR017C	1584	1407	1503	2052	1780	1921	1446	1372	1622	1749	1482	1407	1362	1294	1471	1714	1751	1685	1308	1309	1408	1607	1624	1662	725	611	1768	1451	1949	1510	2783	1465	1268	1542	1555	1916	1303	1418	1420	1531	1438	1443	1476	554	570	1715	1510	1469
YBR018C	4	5	4	5	13	12	2	3	2	1	2	2	7	2	2	2	3	1	15	2	4	9	12	7	2	2	9	1	11	1	7	7	1	3	3	7	3	4	7	3	1	2	3	3	2	2	3	5
YBR019C	3	3	2	2	4	4	1	2	1	3	5	0	1	5	5	2	1	3	5	2	2	5	3	4	11	3	5	4	5	2	2	2	3	1	0	1	4	2	1	0	3	2	0	0	1	2	5	2
YBR020W	16	12	13	23	14	30	10	11	15	26	27	27	22	13	22	20	28	17	21	6	8	14	8	11	10	5	19	4	9	5	12	9	7	6	4	6	6	5	5	16	13	14	26	8	2	17	13	13
YBR021W	212	230	219	159	153	211	210	213	213	239	248	225	160	210	217	192	196	201	248	324	275	155	161	199	122	104	223	210	408	162	323	300	191	226	267	355	203	280	271	248	236	216	259	79	97	224	266	226
YBR022W	122	116	108	137	122	114	82	96	101	150	153	146	84	81	81	140	110	93	170	118	109	129	105	108	32	45	62	92	202	81	187	149	127	105	104	148	91	104	88	133	143	139	159	60	50	142	143	166
YBR023C	1682	1546	1676	1656	1474	1664	1598	1740	1956	1883	1537	1526	1821	1745	1782	1399	1467	1404	1590	1495	1466	1642	1630	1756	804	673	1948	1787	2248	1551	2503	1768	1589	1618	1429	1993	1420	1603	1656	1906	2019	2025	1635	600	583	1970	1764	2242
YBR024W	104	87	95	119	74	84	53	54	73	112	111	90	72	68	69	106	79	78	223	89	120	127	97	118	52	38	109	43	164	43	139	114	145	83	63	101	78	76	107	103	114	105	134	52	46	121	107	139
YBR025C	8074	7912	8062	7526	7067	8097	7938	7543	9301	8644	8910	7993	7944	8217	8175	7501	7389	6903	6998	7747	8070	8043	6879	7400	3338	3124	7623	8917	13529	8706	12647	10696	9072	8464	8297	11219	8080	8407	8837	8484	8950	8522	7714	3041	3009	8869	8884	8008
YBR026C	179	167	161	597	558	584	85	114	88	123	125	93	112	151	121	69	108	72	121	63	87	132	96	112	51	52	136	47	153	38	129	93	77	79	62	95	69	77	101	368	371	339	322	132	134	385	343	331
YBR027C	15	11	13	21	22	12	15	9	14	26	12	16	7	11	10	19	20	20	12	6	8	12	12	14	7	7	8	6	9	6	21	9	11	15	17	14	9	11	17	19	11	20	15	3	9	15	13	19
YBR028C	386	339	341	563	505	542	291	268	371	507	421	377	350	279	305	480	486	421	316	269	306	397	347	326	123	115	380	220	477	217	643	322	285	371	348	422	280	332	356	409	365	366	355	144	128	484	408	319
YBR029C	1129	1067	1081	877	767	879	919	927	1075	1343	1360	1232	943	986	1077	1234	1100	1056	1010	931	937	1096	1053	1153	432	391	1017	1170	1772	1018	1762	1386	1028	1205	1194	1591	1148	1205	1128	1253	1284	1349	1262	464	461	1278	1189	1212
YBR030W	328	297	301	382	325	293	283	271	274	325	278	246	329	286	327	284	297	316	237	284	293	307	312	341	82	95	230	341	468	350	634	362	256	370	359	507	302	331	366	354	331	319	289	118	93	395	331	311
YBR031W	11718	11474	11998	11555	10765	13360	11521	11426	14256	14282	11616	13289	9226	9948	9984	10428	10872	9867	7299	7911	8319	6547	6730	7313	3728	3394	9091	13779	20415	14820	19689	18675	15249	13930	14585	17909	13191	14859	14687	13477	12581	14298	13360	4748	4311	13755	13582	13221
YBR032W	0	0	0	0	0	0	0	0	0	0	0	0	0	0	0	0	0	1	0	0	0	0	0	0	0	0	0	0	0	0	0	0	0	0	0	0	0	0	1	0	1	0	0	0	0	0	0	0
YBR033W	6	5	4	10	7	3	4	1	3	14	14	10	1	3	2	10	18	7	23	10	15	9	10	3	1	3	2	2	3	3	5	0	4	1	4	1	3	3	2	2	3	2	2	0	1	2	1	1
YBR034C	2327	2141	2225	1572	1251	1388	1811	1836	1868	3005	2812	2462	1782	1769	1712	2670	2390	2617	2358	2221	1988	2303	2187	2527	1021	796	2049	2325	3462	2132	3555	2799	2581	2758	2547	3384	2655	2252	2481	2387	2511	2562	1993	814	736	2717	2461	2884
YBR035C	601	575	584	764	694	737	482	508	611	565	583	487	619	620	623	451	452	363	656	497	499	754	610	758	201	224	502	490	919	491	867	725	625	548	505	755	493	512	582	671	750	710	730	295	320	719	732	704
YBR036C	1009	942	972	1017	948	1052	884	823	1030	1528	1260	1209	808	895	845	1024	1070	988	881	616	677	916	846	1024	369	405	879	813	1614	768	1471	1196	1118	993	870	1249	887	996	1045	1045	1078	1120	1367	474	474	1132	1033	1108
YBR037C	150	129	129	133	116	111	82	64	94	160	160	148	78	87	110	190	166	127	249	110	131	77	75	86	37	55	145	76	253	64	306	155	180	149	144	188	127	134	148	165	169	145	197	71	82	230	172	176
YBR038W	792	736	818	895	815	935	681	661	809	874	775	714	573	790	890	713	738	688	487	536	517	926	776	851	364	326	976	890	1216	851	1294	952	866	842	651	1098	653	700	913	892	955	961	773	272	264	1030	875	932
YBR039W	1653	1772	1575	1585	1327	1489	1011	924	1076	1654	1520	1317	1026	983	1023	1302	1365	969	889	1690	1756	1628	1434	1475	645	748	1855	1186	4829	1199	3994	2811	2359	2351	2571	2993	2358	2295	2437	1364	1433	1405	2274	1221	975	1533	1435	1303
YBR040W	1	1	1	3	1	3	6	0	3	1	2	1	2	1	1	1	1	1	1	2	2	2	5	1	0	0	0	1	1	0	0	1	1	0	0	0	0	0	0	0	0	2	2	1	2	0	3	3
YBR041W	735	688	686	894	783	919	564	632	725	934	760	728	710	649	633	688	686	569	795	590	629	825	789	796	317	327	763	549	1072	534	1123	842	678	674	712	936	702	732	675	706	750	705	807	305	287	743	684	720
YBR042C	364	360	363	399	385	448	329	339	389	431	377	359	342	369	313	353	344	305	336	265	312	367	399	453	136	150	401	295	608	329	548	453	391	349	343	451	336	389	348	416	402	439	372	147	142	444	430	371
YBR043C	265	232	230	401	358	322	176	187	236	307	257	235	184	183	186	249	296	255	254	172	206	365	310	349	103	125	201	204	315	176	453	252	234	225	195	297	199	227	208	254	233	211	332	131	132	274	237	206
YBR044C	398	374	364	258	285	243	229	259	281	414	377	337	286	264	349	313	356	248	516	299	324	381	319	358	113	132	367	250	729	244	719	490	405	419	379	540	416	360	432	550	578	556	452	249	182	656	535	590
YBR045C	41	38	41	28	41	42	50	48	56	23	11	16	62	67	43	13	15	13	169	161	229	49	52	45	8	10	25	18	32	15	39	17	13	16	13	14	13	11	15	28	29	20	71	26	27	28	33	48
YBR046C	74	64	57	205	216	149	50	56	64	48	34	43	50	50	65	73	59	33	117	69	79	48	40	30	9	10	34	24	91	43	95	56	33	37	59	70	26	55	55	60	41	54	209	79	66	62	41	44
YBR047W	21	16	15	26	13	23	10	20	13	12	7	14	16	18	12	14	6	5	34	16	15	36	28	28	6	1	17	11	22	9	14	16	12	10	14	17	6	10	9	15	33	23	73	15	11	29	27	14
YBR048W	9823	9197	9664	8997	8197	9125	8916	8200	10641	11116	9709	9918	9769	9956	10314	10015	9739	8869	7098	8472	9301	7835	7238	8199	3663	3190	9397	10227	14580	11976	17977	12999	10748	10791	11635	13606	10041	10403	10667	9483	9368	9827	9937	3348	2974	11478	10921	9402
YBR049C	1132	1005	1040	1468	1294	1259	970	885	1218	1250	1195	1076	1077	896	1327	1305	1302	1083	1193	1013	1194	1113	1079	1026	365	436	1092	843	1437	943	2073	1031	764	1124	1012	1358	903	985	982	1059	1036	1029	891	371	427	1345	1107	824
YBR050C	4	3	4	21	11	3	7	2	6	3	2	6	3	6	5	7	3	5	5	4	0	2	3	5	1	1	2	1	7	3	1	2	2	3	3	3	2	2	2	0	2	2	7	2	6	1	1	6
YBR051W	0	0	0	0	0	2	0	0	0	1	1	0	0	0	0	1	0	1	0	0	0	0	0	0	0	0	0	0	0	0	0	1	0	2	0	1	0	0	0	0	0	0	1	0	0	0	0	0
YBR052C	244	227	234	396	413	436	159	176	253	343	275	330	208	251	197	266	242	148	288	158	205	178	141	181	43	46	128	133	389	125	363	258	276	155	235	281	194	191	232	247	265	272	381	121	143	309	242	310
YBR053C	138	120	115	272	229	244	18	25	34	195	164	145	81	95	74	139	127	95	264	137	167	168	115	142	83	69	209	57	244	37	184	131	111	64	102	116	91	87	93	132	116	102	194	61	65	123	94	86
YBR054W	58	42	57	205	197	384	5	15	5	61	60	52	3	31	5	33	32	54	106	42	45	17	25	39	62	16	118	5	81	5	42	18	42	20	16	18	18	30	20	7	4	5	278	53	35	9	5	23
YBR055C	530	480	511	638	530	517	441	418	484	620	554	482	531	470	501	653	599	614	517	462	579	588	581	609	251	195	685	337	619	376	775	470	362	481	463	635	393	452	454	591	554	575	501	235	170	636	595	618
YBR056C-B	1	1	1	3	1	2	1	0	1	1	0	0	0	0	0	1	0	1	0	1	1	1	1	1	1	0	0	1	2	0	0	0	0	3	0	0	0	1	0	0	1	1	1	0	0	2	1	2
YBR056W	232	231	225	533	506	558	143	192	243	277	312	271	157	215	174	235	210	186	307	190	202	341	277	251	52	108	199	84	447	90	314	197	202	129	145	212	164	151	186	230	237	225	298	78	104	215	193	269
YBR056W-A	61	68	72	32	45	64	54	79	85	61	50	69	61	92	72	47	57	69	36	44	64	8	6	7	29	19	66	65	208	78	143	97	75	94	94	118	74	56	86	76	73	76	38	8	11	97	90	138
YBR057C	255	230	232	285	242	229	236	237	291	268	266	199	272	254	259	310	322	277	195	198	213	249	238	257	77	54	205	161	294	201	446	205	197	237	245	339	210	214	221	268	274	253	248	108	96	365	294	236
YBR058C	843	750	800	979	876	922	672	648	785	943	865	765	816	682	765	835	848	894	798	744	820	899	739	871	368	338	939	705	1204	731	1462	808	702	866	810	1163	784	861	832	837	722	761	699	285	244	982	820	805
YBR058C-A	209	198	195	263	224	264	218	195	235	216	205	181	211	246	182	181	174	127	212	191	181	149	111	154	78	83	196	139	288	170	279	240	208	198	203	236	185	181	210	220	260	216	329	105	92	253	260	276
YBR059C	790	710	759	1236	1085	1174	670	695	853	856	719	703	725	768	861	752	808	667	796	651	860	818	851	853	252	256	760	629	949	690	1314	703	620	730	657	886	554	717	659	776	721	758	826	315	266	915	762	774
YBR060C	493	431	455	472	428	453	418	374	517	581	542	469	555	467	580	605	602	561	464	445	535	494	512	496	148	145	397	387	493	417	786	372	316	488	415	560	412	417	414	513	501	485	427	157	151	649	602	469
YBR061C	605	566	604	456	311	433	541	512	671	674	682	564	517	508	530	639	574	579	551	634	652	660	562	623	252	251	623	599	962	566	955	699	744	731	665	858	640	620	697	562	584	600	697	274	240	604	650	675
YBR062C	94	94	91	122	105	122	76	75	82	106	106	68	84	92	96	76	78	71	109	85	113	122	124	132	15	24	44	66	156	63	129	106	103	81	85	108	75	82	84	115	136	112	97	33	36	134	124	138
YBR063C	196	178	187	235	217	229	166	169	197	175	170	139	177	149	220	140	167	164	243	192	208	268	268	243	98	92	283	180	281	161	353	197	153	179	176	237	171	170	161	197	171	183	151	62	51	206	196	174
YBR064W	0	0	0	0	0	0	0	0	0	0	0	0	0	0	1	0	0	0	0	0	1	0	0	0	0	0	0	0	1	0	0	0	0	0	0	1	0	0	0	0	0	0	1	0	0	0	1	0
YBR065C	180	156	171	248	192	205	132	159	172	154	133	130	157	164	178	127	137	153	237	182	211	226	203	245	85	73	240	143	235	155	300	184	141	225	162	200	149	145	180	171	146	145	136	64	63	215	158	148
YBR066C	98	88	96	118	81	87	103	148	109	46	52	49	108	133	148	39	39	52	67	66	75	41	32	46	21	8	25	75	171	68	138	89	187	96	76	104	96	74	86	167	137	124	170	40	27	188	170	257
YBR067C	260	168	237	886	661	1081	333	391	369	15	7	17	133	186	143	12	19	33	158	122	114	64	67	86	192	87	286	67	68	89	55	64	144	47	27	29	45	28	33	132	131	152	1589	491	456	171	172	517
YBR068C	2246	2166	2204	3397	3096	3577	1807	1879	2443	2866	2212	2148	1521	1600	1716	1966	2105	1755	2126	1639	1913	2191	2035	2256	1054	914	2317	1522	3097	1460	2611	2308	1651	1681	1798	2140	1495	1868	1810	3727	3753	3981	1601	561	551	4128	3629	3341
YBR069C	992	873	925	3241	2719	3060	200	248	239	1506	1044	969	207	172	232	1065	1206	1050	1014	919	892	510	553	530	665	616	1624	538	1079	481	1157	703	744	855	795	936	744	695	647	915	910	1059	1192	488	408	1078	954	1008
YBR070C	156	143	148	150	147	152	133	131	197	209	163	178	174	138	133	174	175	133	158	104	101	220	165	191	63	56	125	116	241	134	201	161	166	124	158	178	137	141	160	164	170	163	167	55	79	151	137	132
YBR071W	220	219	239	280	281	319	220	230	279	214	173	205	273	285	301	159	184	176	159	186	221	268	259	289	120	129	367	186	356	156	291	221	212	196	167	245	154	182	188	304	261	241	185	99	77	285	278	302
YBR072C-A	0	0	0	0	0	1	1	0	0	0	0	1	0	0	0	0	0	0	0	0	0	0	1	0	0	0	0	0	1	0	0	0	0	0	0	0	0	0	0	0	0	0	0	0	0	2	0	0
YBR072W	30	25	27	33	35	33	19	12	20	16	22	17	30	23	30	16	15	8	28	14	16	254	198	218	0	5	3	3	16	13	18	9	6	10	3	10	4	6	10	7	2	0	15	8	13	2	12	5
YBR073W	220	205	211	362	304	314	193	201	232	238	224	217	222	175	230	233	260	211	268	189	268	322	346	296	100	118	302	143	248	133	294	154	99	159	164	203	114	189	141	219	217	217	182	80	76	251	207	227
YBR074W	1566	1474	1531	1813	1550	1763	1366	1424	1719	2106	1983	1797	1367	1332	1562	1504	1616	1717	1269	1170	1365	1775	1662	1696	592	507	1386	1584	2338	1320	2530	1904	1502	1620	1468	2089	1344	1573	1608	1480	1575	1574	1614	585	539	1527	1429	1322
YBR076C-A	73	70	72	56	61	63	92	70	96	92	90	75	80	88	73	85	64	55	87	54	62	77	69	76	18	28	74	48	106	59	95	94	70	64	67	96	48	55	70	76	99	87	87	30	23	86	78	99
YBR076W	1	1	1	2	1	4	1	1	0	1	2	0	0	0	0	0	0	0	1	3	6	3	1	3	0	2	1	0	1	0	2	1	2	2	2	0	1	0	1	1	2	0	0	0	1	2	0	1
YBR077C	159	153	151	141	138	132	204	165	201	185	179	162	183	186	189	151	164	132	177	109	134	181	173	191	50	49	117	103	270	108	236	152	154	153	154	206	119	168	171	142	148	154	175	69	74	187	177	146
YBR078W	12640	12043	12559	11558	10135	12963	8090	8433	10204	17068	15972	15406	9644	9927	11001	12022	12484	12621	10235	10088	11729	10090	9347	9992	5218	5253	11122	13823	20845	11910	18437	16418	13538	14917	13266	17310	12824	13744	13921	15292	15131	16328	15297	5940	5748	15090	13661	14595
YBR079C	6079	5352	5727	6532	5957	5935	5730	5596	6828	6153	5110	4398	6144	5637	6798	6139	6546	6467	5510	6415	6932	4783	4935	5176	2250	2061	6333	5096	6435	5459	11298	5813	4669	6707	6142	7783	5514	5699	5638	6315	5494	5495	5051	1884	1768	7959	6550	6231
YBR080C	957	885	925	1482	1368	1321	756	896	965	988	890	831	842	795	861	929	962	902	1019	849	931	879	864	903	380	365	1102	780	1334	822	1578	876	866	963	909	1231	749	943	901	927	928	925	940	310	336	1149	988	977
YBR081C	713	661	678	908	844	852	530	552	618	819	797	661	580	551	707	720	824	703	840	659	747	808	705	771	285	260	915	542	942	579	1123	684	528	784	674	846	575	769	674	734	644	681	663	280	238	790	726	650
YBR082C	2193	2134	2243	2294	2303	2629	2152	1816	2452	2571	2600	2409	2162	2158	2261	2057	2167	1840	1912	2005	2327	2474	1987	2234	812	822	2169	2274	3757	2301	3436	2669	2267	2191	2242	3161	2057	2260	2353	2141	2222	2121	2091	895	849	2276	2109	2274
YBR083W	88	78	84	107	100	113	63	59	80	113	86	77	76	54	73	109	99	98	66	68	80	88	101	77	34	29	70	71	130	116	155	68	52	90	84	101	53	77	84	92	72	77	74	32	30	131	118	133
YBR084C-A	14912	14481	14748	13111	11990	13393	13839	13034	15663	16507	16841	14942	14050	14632	14531	14355	13988	12298	12109	12429	13476	11029	9089	10566	5720	5665	13738	16709	25748	15687	24995	21035	19362	17483	17710	23052	16883	16427	18339	15246	16018	15339	14965	6128	5504	16677	16483	15331
YBR084W	6333	6079	6299	5838	4940	6237	5227	5397	6301	7846	7324	6723	5610	5414	6259	6725	7372	7323	3908	6451	6617	4512	4395	4504	2475	2392	7420	6903	10072	6923	11741	8040	5844	8548	7815	9733	7106	7889	7185	6052	5300	5759	5687	2271	2003	6817	6116	5660
YBR085C-A	252	266	250	235	282	300	201	271	251	252	240	206	262	377	280	162	170	190	209	210	248	276	238	241	89	82	216	144	606	149	409	338	297	288	249	327	283	249	298	268	289	280	422	117	134	281	271	334
YBR085W	123	97	120	119	91	117	134	100	138	182	182	144	163	144	140	172	168	223	236	113	126	100	91	109	73	69	149	96	66	97	79	59	130	64	21	55	49	38	53	153	129	112	87	26	34	132	165	175
YBR086C	3077	2968	3147	3208	2907	3984	2439	2486	2898	3954	4013	3736	2270	2273	2468	2472	2620	2943	2770	2154	2444	3249	2944	3039	1485	1306	3528	3617	5508	3265	4519	4390	3641	3754	3550	4576	3437	3675	3729	2845	3007	3105	3346	1126	1252	2794	2566	2596
YBR087W	561	537	552	454	425	496	576	520	696	578	526	512	557	590	496	434	434	378	500	478	487	635	552	652	218	191	474	530	956	545	806	625	629	546	563	691	528	521	608	677	757	668	654	227	210	716	686	742
YBR088C	1258	1189	1162	1056	823	956	1107	1030	1223	1272	1340	1162	1129	946	887	1149	1114	853	1044	950	1105	1464	1324	1430	567	540	1400	1098	1876	1037	1961	1473	1258	1288	1332	1588	1223	1323	1231	1614	1661	1549	1378	649	569	1515	1448	1184
YBR089C-A	162	155	156	133	110	123	137	129	146	270	243	236	129	141	115	180	159	153	169	128	144	203	163	192	53	64	155	135	262	156	240	229	196	166	192	206	165	151	190	141	160	141	195	66	59	117	132	126
YBR089W	1	1	1	0	1	2	0	0	2	1	2	1	1	1	0	2	0	1	0	0	3	0	2	1	1	0	1	0	1	0	0	1	2	0	0	1	0	1	0	4	1	3	2	1	0	3	4	0
YBR090C	7	7	8	4	8	10	3	5	10	13	12	9	8	9	5	8	7	5	8	3	2	2	4	12	1	4	8	6	10	6	8	16	14	5	5	9	5	8	9	8	9	10	11	3	0	12	5	4
YBR091C	131	121	130	69	65	50	89	66	122	152	139	114	85	117	89	132	121	116	138	95	130	142	141	166	70	56	123	104	197	118	196	164	177	116	121	180	119	114	149	165	182	179	210	71	49	174	167	185
YBR092C	1649	1723	1860	2178	1906	2379	684	800	826	1901	1795	1759	1243	1675	1582	1411	1479	1405	1495	2291	2683	53	38	40	467	670	999	2189	3926	2116	3798	2916	3245	3153	2378	3446	2704	2231	2756	1693	1816	1827	54	22	24	1715	1896	2819
YBR093C	323	284	377	3803	3189	4507	31	36	26	105	117	87	201	270	230	59	83	71	152	84	76	9	10	7	92	79	216	28	89	51	75	56	83	57	57	65	43	35	62	94	77	71	13	4	7	82	72	101
YBR094W	710	645	640	713	642	587	450	434	537	809	777	669	469	425	523	821	831	749	627	556	606	922	867	827	218	201	589	636	1040	614	1330	762	572	775	720	992	630	677	718	686	718	673	694	262	270	864	770	681
YBR095C	275	244	263	278	285	314	231	236	256	356	303	282	264	211	264	359	307	266	253	199	275	321	257	327	98	99	299	187	405	230	456	232	228	280	246	363	232	244	282	273	266	222	223	126	93	313	251	239
YBR096W	456	464	466	643	568	672	365	406	528	648	726	679	399	428	494	458	551	423	154	101	149	533	404	460	205	295	506	428	788	383	643	626	490	443	424	618	413	439	437	441	505	467	633	264	284	432	434	400
YBR097W	474	434	451	655	530	567	334	367	434	552	538	492	374	403	433	496	487	436	547	397	476	680	626	690	179	178	579	314	640	323	693	458	387	422	401	539	382	429	422	481	421	436	413	179	187	584	461	370
YBR098W	170	167	172	192	160	185	108	137	165	197	234	170	131	111	168	153	189	168	205	139	203	246	249	211	77	74	214	136	250	148	244	161	169	180	173	223	159	171	169	173	193	152	197	92	70	155	174	162
YBR099C	21	19	17	19	20	24	13	12	11	17	20	14	18	23	21	21	22	21	12	8	14	32	19	11	8	10	18	12	20	19	21	14	5	11	19	14	11	11	6	38	38	36	23	7	3	54	44	33
YBR101C	588	562	566	752	821	758	420	474	606	700	688	659	531	621	687	791	809	593	512	501	580	714	608	703	296	335	726	439	732	459	935	461	384	492	519	620	447	440	432	551	537	562	537	206	224	696	673	497
YBR102C	450	397	400	636	539	503	324	337	431	588	468	419	394	392	462	580	641	478	407	347	395	439	405	415	113	121	322	341	555	355	847	401	364	434	390	532	339	406	411	398	408	403	401	149	143	509	403	365
YBR103C-A	0	0	0	0	0	0	0	1	0	0	0	1	0	0	0	0	0	0	0	0	0	0	1	0	1	0	1	0	0	0	0	1	0	0	0	1	0	0	1	0	0	0	0	0	0	0	0	0
YBR103W	281	259	244	274	254	217	295	295	338	294	278	219	323	289	258	263	279	200	199	168	204	297	272	267	90	84	240	184	369	213	452	286	230	282	267	358	239	293	263	346	270	265	294	144	110	379	336	283
YBR104W	531	488	517	400	325	413	633	555	684	657	563	533	539	542	543	561	548	602	261	363	335	422	369	409	159	143	295	652	704	559	745	631	690	584	509	717	482	622	582	649	643	593	569	183	175	645	621	618
YBR105C	217	175	208	237	173	211	136	54	140	298	201	199	117	131	163	250	191	276	203	124	123	372	400	467	128	130	222	128	299	134	376	215	268	195	155	243	180	169	213	161	144	149	295	123	119	173	122	190
YBR106W	3673	3494	3577	3438	3141	3392	3005	2726	3417	4825	4532	4444	3575	3519	3476	3819	3687	3246	3060	2750	2936	3203	2788	3012	1297	1266	2669	3934	6188	3983	6330	4907	4787	3601	4155	5191	3684	3688	4214	3175	3591	3519	4712	2020	1925	3443	3449	3448
YBR107C	95	89	84	64	57	54	93	95	84	130	124	114	92	86	109	107	87	67	73	59	66	93	98	84	21	23	52	79	127	71	116	86	90	107	95	98	70	66	81	112	122	115	130	64	54	135	144	117
YBR108W	167	148	156	246	247	261	154	141	195	175	143	140	138	158	162	179	176	152	153	121	159	162	196	202	61	55	147	114	159	124	320	157	110	100	113	165	119	110	117	171	185	164	186	72	70	229	187	169
YBR109C	1194	1129	1122	1207	1099	1222	1112	955	1240	1374	1346	1251	1051	1075	1005	1179	1098	884	1147	1058	1078	1317	1159	1122	501	448	1121	1024	2016	1080	2022	1419	1245	1197	1314	1622	1243	1115	1316	1140	1116	984	1309	570	513	1083	1143	1154
YBR109W-A	10	9	11	16	13	16	8	8	14	15	3	9	11	10	10	10	5	7	11	10	8	14	19	14	0	0	22	3	10	7	14	9	10	7	8	15	4	11	5	8	15	16	7	2	3	21	16	10
YBR110W	402	374	372	539	453	505	363	318	419	449	371	366	335	337	333	376	360	296	431	334	431	478	436	447	191	184	459	300	603	273	588	424	348	332	347	422	337	387	375	407	438	424	416	136	128	481	479	359
YBR111C	433	411	408	730	695	723	306	272	361	526	511	466	320	325	319	396	384	332	465	324	380	507	412	465	135	129	336	314	777	291	637	496	484	436	371	531	371	442	393	396	439	437	532	172	197	420	410	409
YBR111W-A	216	206	197	183	154	190	173	192	201	313	327	342	195	222	196	224	268	166	143	164	140	199	178	209	59	38	111	191	332	147	310	252	190	178	161	213	226	177	216	266	316	290	323	77	58	256	236	286
YBR112C	1158	984	1041	1253	1162	1066	1043	930	1291	1397	1181	1213	992	940	1051	1415	1309	1299	1058	1011	1102	869	881	996	364	363	1114	885	1312	946	2284	1049	781	1130	947	1240	892	1038	954	1263	1154	1198	1087	359	340	1433	1126	1023
YBR113W	1	1	1	1	0	1	2	0	1	0	1	0	1	0	0	2	2	2	0	0	1	0	0	0	1	0	1	2	0	0	2	1	0	0	1	0	0	2	1	3	0	0	0	0	0	2	1	3
YBR114W	226	194	208	309	250	240	191	167	191	334	257	272	204	171	161	332	334	310	242	211	241	288	335	360	67	72	205	145	267	194	362	147	129	170	160	222	122	160	155	176	171	178	229	58	65	217	145	199
YBR115C	2850	2450	2584	1628	1315	1618	3070	2586	3298	2469	2293	2121	2657	2298	2775	1881	2068	2078	1533	1590	1753	3318	3477	3478	748	942	2104	3017	2946	2831	3948	2768	1943	2668	2675	3282	1995	2881	2469	3279	3154	3056	7132	2645	3252	3402	3119	2705
YBR116C	1	1	1	2	1	2	0	0	0	1	1	1	0	0	0	0	2	0	5	2	3	1	0	4	1	3	1	0	0	1	0	0	1	0	0	0	2	0	0	0	0	0	1	0	2	0	0	0
YBR117C	11	8	7	9	14	14	9	11	5	16	0	12	0	2	2	11	13	5	51	27	21	9	7	7	7	8	15	2	12	4	15	7	9	8	8	6	8	6	2	5	1	2	6	2	1	4	4	2
YBR118W	11372	11020	10984	20712	18417	18958	2614	2580	3244	17202	14584	15225	2765	3417	2597	15469	16018	12486	13021	13586	13540	13295	13429	13198	7329	6505	14366	13476	21750	15794	28492	16663	15664	13559	16125	17890	13410	14081	14215	3023	3157	3175	3370	1329	1524	2847	3658	2890
YBR119W	129	124	127	148	150	157	70	90	98	157	181	158	112	92	102	135	148	132	152	133	146	167	135	154	45	47	127	113	204	96	195	144	118	123	122	168	123	127	138	135	110	107	135	65	56	123	118	142
YBR120C	174	162	150	97	94	118	90	90	118	187	168	152	87	84	72	157	139	115	363	161	184	157	124	99	45	39	160	95	351	65	285	225	219	201	180	240	149	182	141	207	273	255	249	78	77	240	236	235
YBR121C	7894	7370	7575	8720	7707	8515	6335	6442	7471	8561	8331	7218	6942	6540	7335	7869	8044	7494	7655	7014	7681	6752	6329	6614	2774	2821	7405	8076	12934	8083	14343	9372	7966	9462	8784	11972	8350	8762	9059	7539	6980	7143	6425	2786	2424	8613	7700	7248
YBR121C-A	0	0	0	0	0	0	0	0	0	0	0	0	0	0	0	0	0	0	0	0	0	0	0	0	0	0	0	0	0	0	0	0	0	0	0	0	0	0	0	0	0	0	0	0	0	0	0	0
YBR122C	432	392	408	281	254	271	268	262	309	396	417	359	246	248	274	370	334	247	702	355	491	446	294	402	208	154	490	291	843	224	725	559	609	455	451	671	440	397	449	506	594	589	554	206	185	599	506	550
YBR123C	241	215	225	326	326	275	187	191	240	288	254	228	187	178	232	313	316	249	227	195	207	266	233	284	79	90	237	175	296	205	456	205	180	218	213	298	176	173	196	234	201	213	230	101	105	248	252	230
YBR124W	0	0	0	0	0	0	1	0	0	0	2	0	0	0	2	1	0	0	0	1	1	0	0	0	0	0	0	0	0	0	0	1	0	0	0	0	0	0	0	0	0	0	0	0	0	1	0	0
YBR125C	356	335	343	311	291	302	274	306	332	413	428	352	310	299	334	371	359	331	303	275	336	453	424	419	132	128	360	360	552	380	515	344	359	348	381	454	332	350	335	383	369	343	407	183	162	429	337	347
YBR126C	699	648	622	1166	1125	1148	369	486	544	702	613	593	510	652	507	540	603	476	965	531	658	511	605	532	175	232	595	312	1369	391	1278	678	738	648	530	709	596	644	714	677	597	553	1160	330	285	883	723	891
YBR126W-A	3	4	3	11	4	2	0	0	2	6	4	0	1	8	2	1	7	5	1	2	2	2	0	1	0	1	1	1	1	7	8	15	3	3	8	7	4	3	6	2	4	2	2	0	0	3	2	0
YBR126W-B	16	17	15	29	28	11	27	22	20	10	13	14	11	8	10	17	10	4	11	17	10	11	14	14	3	1	17	16	31	11	34	21	23	12	20	21	23	24	31	18	16	19	0	0	0	25	35	24
YBR127C	5757	5132	5407	8752	7787	8242	5997	5232	6500	6068	5402	5156	5615	5124	5619	5829	5488	5640	4926	4418	5021	5110	4869	4835	1589	1753	4740	4832	7437	5372	9624	5697	5092	5735	5437	7017	4920	5367	5375	5533	5139	5121	5151	1854	1799	6670	5973	5569
YBR128C	24	24	25	32	26	41	18	15	22	32	35	22	11	27	22	28	33	22	36	14	36	58	50	50	9	10	18	9	44	14	21	28	22	24	22	28	15	12	20	19	23	11	32	11	17	22	15	29
YBR129C	193	186	186	173	190	194	164	143	207	232	268	231	164	168	180	221	202	155	253	141	171	175	159	163	60	70	190	148	347	119	270	235	229	197	166	247	172	169	210	198	234	218	254	88	78	215	210	195
YBR130C	660	605	607	749	681	672	554	567	647	681	686	579	600	524	599	703	633	592	630	558	586	690	606	581	220	225	627	575	995	557	1071	710	563	686	672	950	721	648	632	715	646	626	516	211	216	792	714	683
YBR131C-A	0	0	0	0	0	0	0	0	0	0	0	0	0	0	0	0	0	0	0	0	0	0	0	0	0	0	0	0	0	0	0	0	0	0	0	0	0	0	0	0	0	0	0	0	0	0	0	0
YBR131W	166	144	151	218	189	180	123	109	156	213	170	138	144	129	137	173	202	159	168	149	145	184	158	159	79	70	189	123	208	145	236	128	142	140	163	196	141	174	149	193	116	149	166	61	57	189	136	170
YBR132C	84	87	91	153	213	243	49	60	75	47	38	38	45	56	64	38	33	34	164	72	122	116	91	96	31	44	89	55	194	70	143	108	100	89	70	137	61	89	105	86	111	86	93	27	24	93	103	77
YBR133C	719	649	675	724	621	673	621	590	745	908	817	733	676	599	726	782	874	681	670	559	649	631	630	653	272	244	687	672	1006	682	1253	806	625	707	623	860	615	675	671	764	724	746	679	246	285	815	719	714
YBR134W	0	0	1	0	1	2	0	1	0	1	0	1	0	1	0	1	0	1	0	0	1	0	0	0	0	1	2	0	1	0	0	0	0	0	1	0	0	0	0	2	0	0	0	0	0	0	0	1
YBR135W	211	183	211	203	214	217	204	208	251	246	204	201	232	215	252	288	251	235	135	159	184	217	195	230	73	56	198	168	208	241	409	195	159	160	177	254	154	152	172	197	166	212	233	91	75	247	250	283
YBR136W	711	614	645	1025	858	923	593	602	766	810	726	690	640	596	713	779	771	763	711	615	695	702	643	666	234	231	576	615	806	531	1098	608	458	624	571	767	560	519	551	756	689	699	709	260	272	803	717	601
YBR137W	147	137	137	171	179	167	117	106	187	181	142	145	108	118	106	164	143	93	176	110	134	183	158	158	57	51	112	75	254	71	204	162	167	114	132	168	105	122	110	129	161	146	282	80	106	138	137	189
YBR138C	94	84	96	125	118	127	67	66	106	99	100	98	59	76	93	88	88	95	99	81	88	176	125	148	35	36	96	95	136	70	134	92	107	98	79	124	72	82	89	75	77	80	84	20	27	99	85	94
YBR139W	289	257	260	593	512	555	237	281	302	401	390	332	207	256	267	293	239	204	374	227	293	408	331	370	79	77	215	122	396	97	296	170	181	150	139	198	125	134	185	266	266	248	490	156	156	288	274	298
YBR140C	2386	2208	2395	3221	2845	3333	1704	2025	2289	3034	2731	2755	1846	1742	2321	2119	2362	2604	3152	2146	2568	2855	2820	3033	1002	1144	2996	1978	3067	1623	3093	2421	1894	2282	1955	2714	2027	2248	2034	2666	2604	2785	2165	799	874	2645	2211	2098
YBR141C	156	141	142	189	136	129	138	142	137	150	129	123	146	136	163	172	171	151	119	139	142	170	169	174	44	51	150	126	197	154	281	135	88	149	173	209	135	157	142	164	168	148	160	54	53	200	156	161
YBR141W-A	3	3	3	0	1	1	1	2	2	10	7	7	0	1	1	6	3	2	3	0	4	2	1	1	0	0	0	0	9	6	5	4	6	4	3	6	6	2	2	4	4	2	2	1	0	3	2	4
YBR142W	1973	1824	1899	1667	1348	1556	1708	1700	1778	2014	1836	1676	1765	1525	1788	1993	1976	2020	1444	1872	1818	2083	1962	2129	781	684	1968	2171	3118	1971	3383	2175	1858	2494	2255	3150	2210	2312	2231	2021	1908	1914	1702	698	536	2163	1992	2095
YBR143C	5006	4779	4988	4598	3952	4818	4193	4299	4836	6084	6248	5710	4396	4238	4406	5322	5410	5190	4511	4453	4462	4632	3987	4518	1918	1847	4399	5263	8264	4747	7575	6119	6074	5561	5289	7628	5376	5256	5785	5347	5432	5370	4816	1850	1705	5504	5042	5167
YBR144C	1	2	1	0	1	0	0	1	1	2	1	1	0	4	0	2	3	1	3	1	0	3	3	1	0	0	0	3	2	1	1	2	4	1	2	0	0	1	2	0	1	0	1	1	1	0	1	1
YBR145W	93	72	80	70	82	81	63	75	64	72	78	77	97	124	76	50	65	70	259	117	113	78	79	83	23	22	44	60	66	54	77	46	116	51	47	52	43	42	50	102	93	91	246	61	49	108	86	174
YBR146W	788	699	680	496	405	400	398	442	581	858	909	804	510	478	574	812	799	634	1317	615	755	503	437	508	286	259	735	390	1334	341	1459	855	792	765	772	936	718	640	724	1106	1047	984	908	367	362	1292	1132	1073
YBR147W	9	5	5	7	4	7	9	6	7	2	3	5	5	3	2	5	5	2	0	3	2	5	7	10	2	3	3	6	11	5	5	5	2	3	2	7	4	2	4	2	5	1	87	15	13	0	1	9
YBR148W	18	16	18	15	20	18	48	42	56	25	18	13	8	10	20	20	15	6	17	21	23	32	37	42	9	8	25	10	11	4	7	5	4	5	10	4	6	6	8	7	13	18	48	8	13	6	19	16
YBR149W	1053	1048	979	1221	1137	1140	1173	1291	1319	1334	1424	1177	906	954	919	1151	1017	821	676	375	472	690	589	559	192	231	515	799	2486	805	2186	1331	1184	1261	1230	1767	1118	1169	1445	1125	1091	947	817	346	336	1149	1053	1284
YBR150C	298	269	279	335	303	290	315	313	382	306	314	270	297	305	356	325	312	295	360	240	300	297	252	266	110	109	322	215	379	207	447	253	237	237	251	295	233	238	235	299	314	309	340	129	110	353	320	304
YBR151W	498	474	498	527	473	532	523	537	659	494	460	416	450	478	469	423	403	367	535	378	429	562	516	568	191	175	451	403	893	416	760	526	575	500	495	703	470	495	547	565	567	520	468	172	165	595	545	655
YBR152W	90	74	77	165	120	112	71	49	85	99	87	71	64	64	80	122	129	91	67	74	90	90	83	95	26	36	88	61	89	65	162	57	57	88	85	94	74	67	73	75	58	74	74	29	14	113	76	67
YBR153W	153	141	145	199	147	146	157	144	172	173	163	129	150	137	147	195	166	154	122	93	137	154	162	170	26	40	79	92	208	151	250	159	123	150	152	201	138	118	161	147	160	167	142	47	47	207	213	192
YBR154C	1611	1510	1582	1208	1107	1279	1425	1385	1567	1837	1757	1715	1470	1517	1397	1762	1621	1609	1403	1441	1459	1606	1297	1542	625	587	1629	1692	2722	1640	2655	2006	2002	1774	1767	2223	1777	1621	1691	1485	1646	1663	1808	573	581	1643	1610	1736
YBR155W	519	473	464	610	473	420	438	436	410	552	486	382	487	406	451	584	558	555	489	527	524	607	589	572	195	149	464	431	756	457	865	488	418	551	538	749	528	552	523	494	453	427	350	148	114	602	540	499
YBR156C	190	171	173	240	221	222	172	150	189	238	207	205	163	155	198	227	245	228	184	171	205	170	208	168	52	60	181	115	210	125	343	134	111	198	175	203	152	175	157	179	193	191	197	70	49	213	184	164
YBR157C	5	6	8	15	19	21	3	5	5	0	8	4	5	6	5	3	3	5	4	3	2	13	13	21	2	2	13	4	10	0	8	1	6	3	3	11	4	5	7	8	5	8	5	5	6	4	5	10
YBR158W	624	580	592	1254	991	1204	458	464	606	778	741	700	504	449	457	716	776	678	540	446	579	480	565	561	275	270	672	463	877	395	846	501	400	516	487	648	486	526	514	739	748	754	440	186	149	867	677	565
YBR159W	863	828	837	1040	936	1063	705	684	796	1178	1105	1018	674	689	649	945	914	830	795	658	638	850	687	896	333	317	730	785	1496	721	1383	1148	1026	830	853	1225	843	886	981	774	891	831	910	329	346	901	824	812
YBR160W	376	368	377	356	315	374	310	337	349	425	427	341	342	323	339	403	389	321	322	340	363	433	409	433	176	160	450	335	614	392	686	414	380	390	407	511	342	397	436	373	434	380	333	128	101	409	419	491
YBR161W	132	123	125	166	116	167	109	119	138	202	189	183	139	105	116	130	134	129	138	114	119	83	85	81	60	77	168	96	206	87	203	142	132	117	119	156	105	99	98	160	173	141	121	50	44	153	117	113
YBR162C	3402	3289	3529	4065	3702	4810	3444	3545	4364	5516	4971	4816	3399	3387	3431	3843	4235	4445	3427	3441	3703	2603	2493	2648	1769	1732	3814	3001	3765	2751	3413	3322	2692	2762	2658	3410	2409	2772	2686	3916	4054	4225	3417	1287	1264	4041	3967	3883
YBR162W-A	500	490	494	462	528	589	431	415	496	574	564	503	449	484	410	507	441	414	449	427	446	517	387	469	184	170	427	445	870	436	690	688	598	569	516	735	526	520	591	505	644	597	626	162	143	567	533	552
YBR163W	247	237	236	320	259	314	213	196	217	350	341	286	190	202	216	294	287	269	252	239	253	285	286	272	89	93	242	218	384	210	356	251	189	241	237	334	226	246	248	250	220	192	182	58	60	236	249	242
YBR164C	376	356	379	459	399	534	277	292	387	508	424	422	330	339	301	403	387	327	373	369	344	415	353	376	142	106	406	294	611	292	536	450	434	356	368	563	337	364	400	319	354	351	494	136	127	392	395	425
YBR165W	176	161	173	167	133	182	163	154	176	223	240	187	157	129	178	202	186	168	149	145	124	210	177	174	67	82	190	171	254	173	260	180	192	186	177	244	187	166	185	162	174	184	159	70	54	182	149	184
YBR166C	449	418	438	392	346	423	423	404	508	499	441	457	382	428	394	419	469	406	501	453	477	526	411	500	265	232	548	342	586	361	682	439	408	404	427	556	377	428	414	455	489	432	539	212	178	534	508	507
YBR167C	130	122	127	93	88	118	107	107	148	148	154	136	123	125	123	114	107	107	108	105	107	139	113	139	53	45	109	141	211	111	197	166	142	159	138	183	145	121	131	127	155	150	173	42	61	122	146	135
YBR168W	124	114	113	202	171	165	105	110	101	144	146	141	106	104	105	136	126	112	127	117	118	175	118	114	63	52	130	89	171	88	162	120	117	94	93	133	84	113	102	116	102	108	125	59	46	130	104	117
YBR169C	84	69	76	279	241	238	32	54	63	131	118	111	56	57	33	116	125	91	177	83	106	70	68	81	43	34	149	30	60	24	72	30	36	35	30	54	27	28	32	35	44	37	113	33	26	46	35	64
YBR170C	355	321	346	567	500	481	305	348	456	343	304	283	374	362	482	315	329	260	402	284	412	402	364	347	176	158	464	211	377	241	507	280	233	247	252	415	213	252	276	381	424	347	378	163	166	507	420	322
YBR171W	560	515	531	636	491	554	524	513	590	565	529	449	508	498	495	471	461	408	541	419	454	682	540	606	195	205	549	551	895	492	974	621	576	569	606	868	556	564	607	507	604	537	555	220	239	561	560	542
YBR172C	1128	981	1030	1223	1069	1115	949	900	1108	1278	1176	1040	963	852	1031	1214	1152	1106	1174	854	1020	1141	1087	1066	419	402	1230	956	1324	906	1891	1073	760	1242	1101	1477	934	1048	1071	1165	1133	1057	975	378	357	1397	1172	1112
YBR173C	450	409	424	399	354	400	434	416	556	500	459	445	481	452	478	363	356	285	464	331	375	540	483	502	164	197	424	352	648	390	609	381	343	369	396	517	396	379	398	482	566	516	633	238	229	562	483	502
YBR174C	2	2	2	0	1	1	1	1	1	5	8	2	2	2	4	5	1	3	0	3	2	5	1	0	0	0	2	1	4	4	4	3	2	1	2	4	0	0	4	0	0	0	0	2	1	3	5	1
YBR175W	173	167	174	181	150	203	188	119	222	219	224	206	161	163	186	190	189	160	201	161	165	206	196	200	60	92	186	147	272	140	211	181	162	148	138	184	121	144	158	180	204	176	179	71	71	204	204	186
YBR176W	187	184	173	187	192	174	199	202	241	208	264	177	185	204	209	214	174	150	154	138	144	262	203	249	63	45	145	140	262	128	250	177	139	143	172	191	153	150	147	215	226	198	196	106	79	239	241	224
YBR177C	485	469	457	742	677	762	247	249	312	661	806	723	309	360	363	630	589	519	567	532	540	692	737	638	169	235	472	372	655	369	789	401	265	433	423	564	388	444	452	435	445	439	308	102	102	538	385	339
YBR178W	1	1	1	2	0	2	0	0	2	2	0	0	0	0	1	0	0	1	0	1	0	3	7	1	0	0	0	0	0	1	0	0	0	0	2	1	2	1	0	0	1	1	1	1	0	0	0	0
YBR179C	531	478	471	521	443	483	320	346	407	622	575	486	326	293	426	593	625	496	937	610	753	563	478	409	234	241	725	306	789	272	879	497	337	499	485	604	400	454	439	550	498	511	564	264	247	657	570	473
YBR180W	5	3	4	8	2	7	3	3	3	10	7	4	4	5	3	7	5	7	8	6	6	5	4	6	8	1	15	2	4	1	5	5	3	1	1	2	1	1	3	5	5	1	5	1	0	2	0	1
YBR181C	13178	12830	12976	8987	7871	8786	11220	10168	12714	14831	15173	14504	11622	12402	12095	13104	11823	10802	10357	11964	12643	12128	10000	10936	5525	4981	11892	15168	23949	14477	22153	18447	17801	15021	15850	19165	14664	14081	14975	12953	14710	14246	15586	6283	5813	14348	14754	13789
YBR182C	69	64	72	50	34	51	91	127	129	109	88	87	104	106	116	103	95	101	68	73	85	61	43	60	32	28	98	45	69	49	72	42	26	34	39	45	25	48	31	73	69	77	91	25	29	77	68	93
YBR182C-A	5	7	5	0	4	1	4	12	12	16	22	11	4	18	10	7	14	12	3	2	0	5	7	6	3	2	4	3	6	2	9	4	2	4	4	4	5	2	6	5	5	5	9	1	1	5	3	2
YBR183W	91	82	85	50	37	47	96	115	101	167	151	172	92	140	79	166	155	136	123	65	67	48	70	58	59	45	194	37	153	32	115	71	57	58	49	85	47	40	74	58	51	51	180	42	39	68	44	77
YBR184W	43	43	42	63	74	83	54	35	56	60	61	50	46	38	43	59	55	30	56	37	64	38	40	29	12	18	41	25	53	23	54	51	29	18	35	43	25	37	28	42	46	41	54	16	23	43	42	42
YBR185C	309	294	285	188	154	198	195	210	234	291	319	330	162	171	231	274	235	188	513	285	343	276	219	256	102	104	229	201	637	144	571	429	378	282	350	402	291	289	310	436	446	408	441	160	179	409	401	452
YBR186W	2	2	2	2	1	1	2	0	3	3	0	1	3	2	2	2	6	1	1	1	3	1	1	3	1	1	2	3	2	1	4	4	0	1	5	2	4	6	1	1	1	3	5	1	1	1	1	1
YBR187W	1272	1252	1253	1135	1047	1198	1218	1215	1387	1419	1396	1354	1338	1294	1229	1126	1220	1191	810	885	853	937	882	883	421	447	780	1481	2151	1391	2258	1990	1738	1448	1548	1881	1341	1406	1554	1265	1428	1469	1438	469	495	1442	1399	1388
YBR188C	74	73	69	82	78	87	54	58	73	74	77	62	69	69	50	64	73	61	71	70	80	72	67	80	26	18	44	65	136	50	130	78	78	86	90	108	72	67	84	72	87	75	75	39	36	92	81	64
YBR189W	27010	25909	26569	24786	22023	25075	25462	23044	29063	28913	29069	26748	24909	25357	25441	25892	24770	22655	19108	24867	25844	24915	18794	23174	9731	9042	22594	30151	46950	28598	45793	35106	32207	31077	32060	41876	30922	28629	31481	28137	27618	27830	25713	11344	9343	29634	29964	26602
YBR190W	0	1	0	0	1	1	0	1	0	1	0	2	0	0	0	0	0	0	1	0	0	1	2	0	0	0	0	1	4	1	0	1	1	0	0	1	1	0	0	0	0	0	1	0	0	1	0	1
YBR191W	12757	12419	12636	11726	11064	12144	11608	10857	13390	15085	14847	14389	11334	12205	11385	12551	12418	10726	10849	12035	12326	12308	9520	11314	5761	5452	13076	13137	20983	13471	21048	17428	15674	13697	14853	17748	13465	13106	13550	12098	13356	13320	13723	5011	5051	12971	13155	11980
YBR191W-A	242	226	248	199	175	203	195	192	299	233	247	233	220	235	205	245	204	154	186	224	201	237	138	190	222	161	412	273	388	252	464	303	362	207	258	297	216	244	274	231	237	263	284	111	131	221	277	245
YBR192W	431	404	390	233	254	255	302	290	328	437	409	317	320	307	312	363	326	263	623	356	405	309	288	270	125	147	364	267	743	234	825	551	484	462	447	673	399	483	514	605	641	635	506	171	174	686	645	623
YBR193C	128	117	121	157	122	147	125	99	133	133	141	107	99	123	111	130	102	81	133	125	143	157	128	155	55	59	122	102	169	123	206	145	120	118	143	173	109	124	119	117	115	129	127	49	50	150	117	106
YBR194W	84	79	81	59	60	58	62	71	69	104	96	99	61	77	65	77	86	79	73	55	70	139	98	114	24	21	71	63	132	67	107	106	94	99	82	134	90	81	87	82	95	94	116	44	40	98	79	74
YBR195C	242	223	227	279	249	274	180	193	231	256	248	244	186	147	185	248	231	246	243	232	259	293	260	300	115	90	265	194	403	206	397	246	178	251	250	302	232	227	207	255	250	198	238	82	95	270	242	219
YBR196C	20644	19143	20500	23993	21546	25332	19216	19753	23043	21378	21966	20570	17772	18556	19860	15385	15746	15629	28000	17394	19038	16760	15176	16806	8078	7659	18780	23531	31793	22732	28164	24620	25093	21491	19424	25370	19526	19919	21189	22807	23436	23630	21056	8381	7620	22500	21772	22805
YBR196C-A	20	16	18	3	6	6	23	21	26	34	24	32	14	18	16	17	22	25	5	10	2	6	12	9	8	3	14	30	23	22	45	24	16	24	17	28	15	23	19	25	19	29	33	8	9	18	17	18
YBR196C-B	20	18	20	13	11	14	16	32	24	29	19	21	19	14	22	28	20	16	4	3	6	9	9	8	7	11	18	21	27	33	27	28	30	30	24	30	27	15	17	23	24	20	40	9	12	14	21	30
YBR197C	99	85	89	168	151	145	77	82	88	117	76	84	69	49	96	116	112	98	81	119	115	118	121	148	31	41	81	83	109	75	204	71	64	95	83	109	55	76	69	84	70	70	85	27	30	97	82	62
YBR198C	606	521	538	927	747	655	445	467	600	761	577	600	487	459	519	781	841	640	563	537	586	522	569	598	228	198	631	465	680	511	1178	497	420	473	485	687	407	471	482	587	530	536	567	168	160	705	594	452
YBR199W	816	770	766	908	966	1024	258	282	270	941	908	790	683	710	738	753	687	602	1086	720	724	760	703	684	393	341	849	746	1509	715	1371	1048	1025	791	743	1146	809	845	935	887	897	855	1008	374	304	848	816	828
YBR200W	339	288	301	440	346	393	256	259	320	417	370	327	305	286	284	397	403	333	288	235	278	437	389	396	109	126	260	275	409	274	633	281	255	299	244	381	252	320	314	305	264	261	308	88	105	363	306	336
YBR200W-A	0	0	0	0	0	0	0	0	0	0	0	0	0	0	0	0	0	0	0	0	0	0	0	0	0	0	0	0	0	0	0	0	0	0	0	0	0	0	0	0	0	0	0	0	0	0	0	0
YBR201C-A	17	15	18	23	17	24	17	16	15	15	18	13	32	19	23	8	14	9	31	30	20	13	12	20	4	7	11	7	19	12	21	9	58	18	12	10	11	15	17	23	13	14	25	17	5	13	6	26
YBR201W	106	106	107	120	115	151	58	85	78	113	119	103	100	147	104	72	98	92	107	92	98	166	126	150	36	31	81	110	214	96	198	150	142	98	106	157	123	100	112	94	85	89	135	37	54	66	81	99
YBR202W	1054	922	976	1095	982	1106	967	955	1134	1196	1002	850	933	990	1163	1176	1235	1070	1010	982	1088	1087	1061	996	378	399	1047	866	1199	812	1840	851	836	930	796	1191	773	773	876	1145	1098	1107	921	352	370	1495	1149	993
YBR203W	313	276	325	122	86	113	237	214	232	451	385	398	209	180	221	382	374	455	159	118	121	292	335	358	111	84	196	224	592	197	616	389	523	389	265	508	423	319	403	393	386	410	241	69	60	440	341	684
YBR204C	107	104	98	179	165	152	92	77	81	122	124	113	108	101	95	114	114	81	142	114	141	135	156	136	30	46	101	60	151	64	162	101	88	98	76	109	69	100	100	103	89	89	82	52	29	113	97	89
YBR205W	697	677	653	790	733	747	552	552	601	761	751	669	609	603	631	699	761	636	652	605	610	838	767	753	204	208	530	631	1098	616	1151	813	677	732	773	936	690	692	735	717	771	719	661	241	233	775	782	705
YBR206W	79	73	74	84	94	84	76	65	78	80	62	52	62	49	79	67	70	63	65	66	69	103	97	98	28	25	60	85	111	56	125	100	75	73	78	116	77	79	81	105	80	73	63	34	40	89	79	82
YBR207W	427	405	376	441	412	411	260	288	347	754	516	494	260	250	246	470	542	378	555	305	369	445	439	457	168	136	400	240	697	266	717	474	365	358	449	538	344	424	432	433	474	422	489	215	201	478	458	317
YBR208C	812	768	921	722	755	810	470	480	620	562	582	567	1020	1082	1447	538	543	612	1801	1549	1920	1078	1010	1051	195	735	758	724	751	686	805	532	1363	705	630	706	612	683	565	1175	1040	1004	539	171	243	1238	981	1459
YBR209W	1	1	1	0	3	0	2	4	3	0	0	0	1	1	0	0	1	0	0	0	0	7	6	5	0	1	0	0	2	1	1	1	0	1	0	2	2	0	1	0	1	1	0	0	0	0	0	0
YBR210W	158	153	153	184	184	215	164	146	182	182	141	157	151	157	153	134	135	105	147	145	142	173	146	167	68	65	135	135	243	99	185	164	189	132	148	177	132	123	152	192	226	180	208	94	64	190	183	182
YBR211C	144	135	142	140	115	147	125	110	134	174	178	186	97	103	110	138	146	124	174	113	131	151	112	166	69	68	159	122	288	98	201	177	193	145	154	203	163	142	138	133	133	147	191	72	82	144	118	109
YBR212W	422	400	419	520	479	538	366	386	479	483	477	459	343	333	393	367	452	374	490	360	438	467	496	508	192	223	598	331	636	300	677	426	334	484	373	513	320	386	418	432	447	442	410	149	131	454	372	364
YBR213W	38	31	31	58	40	30	33	31	39	32	27	37	30	34	30	52	36	27	40	33	43	21	34	28	12	13	23	22	47	32	97	31	28	33	28	34	24	27	18	38	36	45	38	16	11	42	33	38
YBR214W	74	71	73	158	192	177	47	51	72	86	67	87	59	84	39	63	74	60	89	36	65	81	118	92	21	42	76	16	132	18	89	56	90	46	25	59	43	41	49	64	50	48	170	50	45	77	53	112
YBR215W	252	227	235	310	269	291	233	203	274	353	312	225	229	166	234	311	329	271	238	239	271	293	303	281	103	91	306	140	275	165	373	237	179	211	227	285	199	200	221	272	236	180	218	86	92	291	238	256
YBR216C	430	418	401	469	445	454	334	342	424	470	478	417	347	366	374	424	434	402	437	371	391	463	429	393	197	196	493	363	725	304	632	527	430	488	419	572	401	458	416	470	436	427	469	179	139	490	461	383
YBR217W	61	56	61	61	40	75	48	48	63	77	60	63	41	61	50	58	59	60	79	64	71	86	56	59	29	30	76	55	99	42	99	74	70	58	58	81	49	55	72	52	60	62	52	23	20	70	53	50
YBR218C	4783	4299	4550	5656	5196	5379	4105	4037	4902	6839	6387	6252	3957	3669	4110	6021	6532	6301	3014	3689	4273	5519	5331	5902	1109	1236	3048	4610	5166	4508	7547	4112	3496	4140	3710	4922	3609	3989	4053	5029	4840	4748	4974	1955	2062	5621	4639	4294
YBR219C	0	0	1	1	1	1	0	1	1	0	0	2	0	0	0	1	1	1	0	0	0	0	0	1	0	0	1	0	0	0	0	0	0	0	0	0	0	0	0	1	0	0	0	0	1	0	0	0
YBR220C	373	354	366	382	323	422	310	322	376	403	397	378	350	307	311	353	391	350	331	284	348	305	344	357	179	148	379	322	594	319	548	451	403	414	408	526	435	412	396	412	388	375	445	174	171	401	367	386
YBR221C	2825	2726	2758	3631	3213	3851	2255	2307	2681	2469	2390	2195	2548	2386	2617	1890	1976	1752	3644	2329	2559	3105	2864	2885	1118	1228	2591	2575	5223	2470	4603	3753	3423	2972	3078	4051	2876	3106	3164	2746	3006	3001	2994	1266	1225	2942	2759	2912
YBR221W-A	0	0	0	0	0	0	0	0	0	0	0	1	0	0	0	0	1	0	0	0	0	0	0	0	0	1	1	0	0	0	0	0	0	0	0	0	0	0	0	0	1	0	0	0	0	0	0	0
YBR222C	636	571	615	845	798	817	528	603	715	504	468	538	676	634	731	429	471	416	815	411	480	593	548	568	328	294	732	546	932	514	956	649	603	600	522	702	494	532	554	707	739	728	824	309	315	699	648	810
YBR223C	73	67	64	120	133	79	49	59	67	75	69	59	68	47	74	86	89	69	90	62	60	55	102	89	13	18	73	45	81	45	170	53	50	57	65	67	42	54	61	65	64	61	59	25	24	101	79	79
YBR223W-A	0	0	0	0	0	0	0	0	0	0	0	0	0	0	0	0	0	0	0	0	0	0	0	0	0	0	0	0	0	0	0	0	0	0	0	0	0	0	0	0	0	0	0	0	0	0	0	0
YBR224W	1	0	1	0	2	1	0	1	1	2	2	3	0	1	0	0	0	2	0	0	1	0	0	0	0	0	1	1	0	0	3	0	1	1	1	0	0	0	0	0	0	0	1	0	0	1	0	1
YBR225W	183	160	173	305	241	266	139	161	193	200	187	161	166	145	179	205	201	185	157	119	188	196	190	191	47	58	148	140	239	143	347	149	138	174	153	196	127	162	157	173	141	172	179	73	78	191	176	194
YBR226C	4	5	5	5	7	5	1	6	7	2	4	6	3	5	3	7	9	5	1	4	1	5	6	6	3	0	4	4	10	5	10	4	3	4	6	10	6	4	1	4	5	4	2	0	1	6	1	7
YBR227C	386	368	371	397	338	388	295	324	389	417	409	340	374	337	336	438	429	406	316	334	347	393	373	369	164	160	471	344	669	299	664	456	403	434	387	574	365	418	382	377	350	333	403	146	135	404	393	387
YBR228W	93	84	85	115	106	99	66	59	81	123	101	99	89	89	77	123	121	101	86	93	105	117	75	99	50	29	90	75	134	69	164	94	59	96	101	138	82	80	91	59	65	67	60	30	24	83	88	71
YBR229C	920	843	884	1278	1176	1337	898	985	1177	850	770	757	1011	940	1069	592	584	541	1054	726	844	1222	1145	1148	331	332	855	566	1163	535	1165	817	709	699	665	922	654	705	717	1319	1207	1223	948	299	327	1215	1134	1098
YBR230C	105	112	96	191	182	190	60	61	83	111	80	100	50	72	51	87	81	53	66	61	92	123	98	81	46	48	98	55	268	67	192	176	135	105	141	133	102	135	137	84	92	65	218	95	81	91	89	80
YBR230W-A	5	6	6	15	15	14	1	4	7	4	0	5	2	7	2	3	5	2	2	7	3	1	3	6	3	1	5	3	6	8	13	21	15	3	7	7	6	9	0	3	1	2	11	3	6	9	2	15
YBR231C	34	31	30	43	28	39	39	27	36	37	19	23	42	46	51	53	48	14	37	40	38	32	30	40	13	16	31	20	29	32	65	35	17	25	28	36	16	34	28	21	21	27	30	17	16	44	40	24
YBR232C	0	0	1	1	1	1	0	0	1	0	1	1	0	0	2	0	1	1	0	0	2	0	2	1	0	0	0	1	0	0	0	0	1	0	0	0	0	0	1	1	1	0	0	0	0	0	0	0
YBR233W	147	133	138	153	159	165	109	129	195	205	157	148	150	130	151	175	203	120	132	110	149	130	138	125	48	59	150	112	166	117	270	102	88	138	132	169	98	132	127	156	123	151	123	61	61	213	189	152
YBR233W-A	61	59	59	62	88	80	40	41	53	92	103	84	54	47	34	92	68	69	91	43	74	59	42	51	19	15	55	49	87	38	74	77	70	57	64	73	41	53	69	50	70	64	86	22	24	45	72	48
YBR234C	1149	1102	1137	1190	1041	1188	1136	1156	1423	1321	1230	1075	1337	1397	1440	888	934	879	1047	859	923	1062	907	989	461	447	987	833	1640	872	1542	1245	1057	1001	984	1387	900	979	1131	1478	1633	1509	1455	536	526	1579	1545	1675
YBR235W	455	412	438	599	492	616	281	341	411	586	500	502	324	356	365	521	520	489	469	410	452	675	607	670	221	180	491	350	520	322	675	475	403	430	391	494	367	393	378	407	417	406	459	166	169	464	410	408
YBR236C	370	340	353	431	356	414	291	333	380	391	341	284	410	360	413	333	310	272	348	335	395	475	407	423	137	162	385	296	514	271	562	344	329	357	340	415	288	323	362	425	395	393	316	150	117	492	424	449
YBR237W	239	224	224	318	300	308	176	186	221	288	262	212	222	192	206	265	306	279	283	206	212	302	253	274	92	113	298	155	312	170	343	234	186	226	209	276	170	215	232	249	204	176	252	125	92	242	246	224
YBR238C	1758	1552	1757	1160	1021	1077	1698	1839	1943	2417	2350	2214	1576	1441	1627	2167	2209	2347	1202	1617	1585	1275	1375	1535	712	655	1719	2188	2194	1930	2775	1646	1840	2193	1664	2409	1792	1666	1755	1670	1600	1754	1737	603	565	1801	1398	2057
YBR239C	209	193	202	141	152	154	159	177	243	371	367	301	188	179	180	333	317	339	244	209	232	207	218	201	80	76	185	164	214	190	298	166	121	171	145	195	144	178	176	204	206	235	181	63	72	248	226	200
YBR240C	20	17	19	11	11	7	23	16	18	41	14	32	9	11	18	27	29	16	64	48	67	26	19	18	10	13	19	2	7	8	11	11	3	8	7	9	6	3	5	19	27	29	21	9	6	28	33	31
YBR241C	44	40	44	107	79	92	35	21	55	75	57	62	32	35	26	60	55	49	44	33	46	70	89	99	13	27	39	16	40	26	52	37	27	13	21	28	24	26	19	31	20	41	49	27	20	34	36	37
YBR242W	512	479	527	361	294	388	573	526	699	563	515	525	560	558	573	506	498	436	364	393	382	765	578	741	195	173	425	538	752	483	675	575	504	479	468	660	447	452	510	563	644	741	496	161	157	598	594	680
YBR243C	325	322	326	443	409	465	247	264	346	494	409	398	298	304	279	325	369	329	332	251	299	269	268	270	125	137	285	253	526	253	522	439	395	283	344	426	287	322	322	293	349	363	358	136	138	348	310	328
YBR244W	506	533	496	617	598	775	437	477	605	633	729	666	300	384	401	565	465	262	206	196	280	376	250	295	47	53	217	870	1097	690	874	779	390	518	746	978	536	720	679	569	774	656	386	158	155	654	571	396
YBR245C	1260	1152	1177	1688	1568	1550	949	1014	1278	1373	1245	1143	1150	921	1080	1396	1551	1282	995	1081	1262	1032	1135	1070	480	586	1522	1149	1628	1044	2385	1278	936	1299	1111	1639	1098	1215	1161	1249	1259	1207	1005	392	386	1659	1300	1101
YBR246W	500	458	478	462	379	393	406	370	445	722	618	563	439	414	454	677	646	583	347	375	393	498	491	514	161	155	393	516	743	592	899	548	472	492	593	712	501	465	541	498	434	465	360	156	143	521	477	514
YBR247C	1342	1158	1241	1152	894	863	1174	1130	1384	1595	1357	1198	1333	1106	1309	1709	1705	1723	1013	1264	1274	1146	1159	1221	501	398	1137	1175	1593	1291	2575	1261	1008	1542	1311	1798	1131	1240	1301	1293	1210	1306	1084	339	378	1700	1398	1431
YBR248C	684	595	630	994	772	845	664	620	840	816	636	569	792	669	745	789	691	665	580	549	647	728	729	709	256	206	592	403	691	524	1035	567	504	518	618	706	453	553	572	680	649	548	751	289	238	805	681	745
YBR249C	5221	5118	5234	3568	3292	3965	4314	4189	4874	5662	5632	5295	4281	4448	4207	4762	5068	4767	3091	4041	4065	5060	4352	4794	1831	1806	4492	6852	10024	7061	9910	7738	7297	6736	6530	8114	6302	6377	6464	5790	5768	5721	4370	1680	1541	5779	5826	5850
YBR250W	10	11	11	18	13	16	9	6	7	15	13	7	5	7	3	4	3	9	15	23	22	19	31	28	13	14	34	6	6	9	11	7	0	5	7	7	6	8	6	3	9	5	15	5	6	6	8	9
YBR251W	344	309	293	278	226	192	206	191	257	320	300	261	207	185	203	318	315	233	622	332	414	275	277	264	115	91	280	153	553	157	656	378	374	325	359	439	301	317	284	484	438	402	369	180	152	533	499	479
YBR252W	414	395	402	365	328	330	332	308	401	458	335	469	343	344	277	390	398	318	384	410	391	357	385	419	163	136	373	423	681	482	798	594	522	433	552	534	457	456	497	373	383	415	507	181	181	421	430	423
YBR253W	84	82	83	97	61	100	67	50	82	81	88	86	64	64	72	72	82	70	80	85	69	122	91	105	46	34	73	86	166	100	140	123	121	78	101	115	82	74	75	80	92	75	97	25	28	73	88	81
YBR254C	151	138	143	126	126	146	159	115	154	167	172	135	128	138	123	146	158	91	157	120	128	223	154	206	72	68	152	118	200	142	202	169	160	140	161	158	132	115	153	154	165	173	178	53	60	157	150	165
YBR255C-A	42	37	40	58	58	57	37	31	39	43	49	53	36	31	33	52	53	47	46	38	33	56	32	61	14	22	38	26	57	25	54	33	36	29	42	33	38	26	35	39	43	50	55	20	10	43	25	54
YBR255W	121	113	111	186	200	159	92	92	104	143	123	100	126	105	126	131	162	135	128	101	106	141	130	120	40	40	141	63	130	66	192	103	87	96	89	130	90	119	105	113	121	110	133	34	44	143	141	130
YBR256C	457	423	439	543	509	517	410	378	528	460	425	386	435	501	476	365	320	285	412	335	394	750	582	675	99	110	253	280	540	256	501	406	412	259	284	409	297	288	336	619	740	647	825	220	250	596	702	766
YBR257W	207	198	204	198	139	205	160	191	214	228	202	229	190	203	187	218	224	175	188	213	185	285	252	260	75	80	218	206	341	188	305	248	242	216	197	265	205	182	226	186	207	196	241	93	78	209	205	194
YBR258C	32	32	34	30	34	41	15	11	27	45	28	38	21	24	18	30	32	26	48	37	37	37	33	35	18	11	51	20	58	24	60	51	54	35	40	45	26	42	36	29	35	30	36	10	10	32	40	43
YBR259W	193	178	193	242	211	236	185	205	247	193	191	170	193	197	223	179	164	171	235	158	203	230	214	217	88	89	244	120	234	107	257	166	127	152	149	224	151	130	161	214	227	222	245	101	105	215	232	238
YBR260C	340	308	316	456	404	366	264	244	324	400	384	349	259	241	323	394	375	351	313	259	337	413	407	401	113	151	372	246	457	275	555	351	252	361	288	407	264	300	311	330	308	292	326	140	120	401	313	263
YBR261C	289	251	267	346	288	293	231	201	301	363	286	287	255	293	262	361	324	282	186	186	237	216	276	301	112	96	223	198	295	303	601	302	220	286	312	366	232	286	255	303	200	264	274	92	91	376	326	322
YBR262C	217	199	193	163	151	145	151	124	143	242	164	211	117	129	115	180	177	152	384	168	192	206	216	198	103	87	165	89	406	120	338	265	294	198	235	258	216	211	205	261	270	276	336	145	113	276	244	301
YBR263W	3441	3119	3247	3910	3472	3915	3024	3002	3508	4707	4375	4023	3288	3083	3466	4159	4254	3778	2902	2964	3147	3577	3184	3156	1150	1390	3133	2791	4246	2992	5882	3017	2666	3055	2979	3685	2676	2715	2942	3478	3123	3268	3005	1281	1314	4013	3700	3714
YBR264C	84	80	81	90	109	123	86	61	81	124	100	119	72	64	62	113	119	73	77	76	81	55	53	54	35	34	71	67	100	54	125	104	91	81	73	93	68	77	86	91	106	101	78	33	27	100	98	93
YBR265W	454	408	420	501	494	533	433	379	519	613	536	495	436	368	403	547	581	538	481	418	458	343	323	306	191	216	471	245	576	275	752	458	386	440	366	518	357	384	428	447	395	392	504	187	173	521	439	398
YBR266C	1	0	1	0	0	1	0	0	1	2	0	1	1	0	1	1	0	1	0	0	1	0	0	2	0	0	0	0	1	1	0	0	0	2	0	2	1	0	1	0	0	0	0	0	0	1	1	0
YBR267W	849	738	784	696	523	565	680	640	769	1124	793	685	816	653	713	1177	1067	1047	666	826	849	724	921	1003	333	328	865	696	852	784	1517	826	617	1066	926	1139	783	881	855	872	711	773	619	289	215	971	841	878
YBR268W	177	161	159	130	109	118	85	95	147	233	159	178	92	140	102	166	160	120	307	178	187	161	109	133	61	50	112	76	333	89	298	232	259	165	179	223	160	154	168	196	214	209	289	86	107	235	215	226
YBR269C	70	65	59	130	104	101	39	38	60	94	83	64	37	46	35	93	93	66	80	42	71	86	63	51	16	27	77	39	118	32	135	75	59	35	65	66	49	53	66	49	50	53	102	33	28	70	78	50
YBR270C	68	65	61	89	72	88	52	54	58	102	92	76	64	76	67	82	97	72	67	53	57	106	84	90	22	10	64	44	90	57	102	52	35	54	70	76	43	59	47	73	56	58	57	33	19	65	71	54
YBR271W	368	341	349	402	314	299	279	291	344	514	376	349	354	274	316	503	481	479	243	324	324	330	358	345	128	126	312	311	512	383	675	388	315	423	438	519	387	422	450	347	319	326	235	113	92	388	376	379
YBR272C	168	162	158	194	184	176	109	114	151	230	197	175	143	141	136	217	222	168	201	161	168	242	230	230	73	78	180	78	268	93	258	168	138	136	144	184	131	150	177	176	145	170	150	63	64	182	172	162
YBR273C	318	298	293	384	368	370	247	239	302	359	291	260	320	302	261	309	301	248	262	269	292	397	350	355	121	107	341	226	500	254	496	313	260	293	304	448	298	325	309	352	317	270	315	125	105	392	355	318
YBR274W	295	277	268	344	312	284	228	222	272	391	359	307	222	206	302	325	306	280	299	308	291	399	336	300	111	102	297	229	456	215	455	352	233	288	273	347	265	276	253	267	296	267	307	139	111	301	216	265
YBR275C	738	667	681	1051	1068	955	625	599	823	834	682	732	761	704	798	827	872	791	769	640	727	643	688	666	225	236	691	553	808	508	1293	639	455	623	598	799	494	681	588	765	816	759	688	280	262	922	688	660
YBR276C	736	691	693	921	794	905	645	646	741	758	677	610	703	653	703	714	770	619	726	709	705	857	944	883	271	292	746	511	935	572	1307	738	589	723	670	879	571	712	647	713	759	742	720	281	256	905	788	792
YBR277C	2	2	2	0	1	1	1	2	4	2	1	1	2	4	4	1	1	2	2	3	0	4	2	1	0	0	4	2	6	0	5	1	4	2	2	6	1	2	2	1	0	3	1	2	0	2	0	2
YBR278W	81	80	77	95	98	74	85	81	81	104	108	83	64	77	62	112	113	81	68	57	76	84	100	100	16	25	54	64	97	56	94	81	64	80	79	107	57	60	69	83	109	107	119	39	47	85	82	91
YBR279W	529	482	484	603	537	583	480	414	543	608	546	450	471	393	489	606	609	528	474	468	442	532	526	559	195	175	523	429	694	426	880	502	400	552	509	659	451	525	480	570	539	447	445	197	185	644	602	547
YBR280C	57	57	60	115	121	126	40	42	63	67	70	52	42	50	53	66	59	64	69	71	68	89	77	76	20	37	82	23	73	28	77	38	46	31	34	49	23	33	47	37	53	48	82	31	30	81	62	61
YBR281C	591	572	576	734	653	804	513	518	624	657	574	481	783	779	857	533	594	481	309	295	317	591	515	489	169	180	530	672	984	694	1079	788	558	636	665	944	601	724	692	529	518	464	404	165	143	651	633	566
YBR282W	233	201	214	164	142	163	130	126	159	267	237	238	122	145	157	193	208	145	431	200	223	190	134	158	134	109	272	99	370	121	349	252	292	195	181	263	218	149	232	305	305	317	321	110	115	372	347	353
YBR283C	4018	3907	4041	3915	3520	4079	3195	3575	4157	4994	4947	4557	3564	3372	3780	3844	4090	3742	3351	3253	3557	3457	3244	3435	1743	1712	4295	4620	6972	3814	6423	5265	4555	4631	4163	5949	4104	4565	4828	4304	4623	4570	3595	1377	1352	4533	3930	3943
YBR284W	31	29	30	33	40	45	25	33	31	53	53	46	23	20	26	47	56	35	48	24	35	44	45	54	17	12	30	10	50	10	39	18	17	16	15	34	14	18	14	34	17	16	30	8	17	26	25	40
YBR285W	4	4	4	4	4	5	3	8	3	11	12	13	4	9	4	7	8	7	0	1	3	4	4	4	2	0	5	1	3	0	4	4	2	0	0	3	2	4	0	1	4	0	14	3	3	4	1	3
YBR286W	6783	6524	7041	8523	7572	8845	5937	6171	7590	7164	6871	6478	6469	6078	6700	5867	6036	5721	5207	5789	6450	8602	8190	8480	3104	3514	7900	8397	10562	7881	10979	8369	7365	7570	7001	9266	6887	7070	7466	7101	6949	7239	2454	901	853	7490	6794	7387
YBR287W	1268	1273	1303	1257	1157	1450	1093	1345	1488	1445	1351	1298	1048	1289	1205	1052	1029	1072	792	1017	990	1101	995	1122	600	526	1214	1365	2693	1276	1963	1583	1472	1440	1391	1695	1345	1437	1475	1360	1359	1495	1655	630	540	1498	1295	1758
YBR288C	535	500	525	603	534	640	423	411	520	562	501	511	462	482	458	546	504	450	502	478	512	563	456	523	228	199	608	459	920	510	945	643	570	544	594	736	547	499	581	549	508	519	525	197	166	562	575	571
YBR289W	338	294	311	430	365	396	275	236	322	427	358	318	276	214	296	369	357	353	308	241	372	311	345	323	106	125	383	247	447	285	633	325	250	346	332	416	307	359	308	347	297	272	281	101	101	401	305	277
YBR290W	253	244	263	250	229	262	203	242	265	331	311	242	199	239	213	232	246	250	257	196	215	315	310	292	112	94	279	227	420	237	373	294	324	251	237	401	205	237	308	289	263	243	270	84	88	288	264	319
YBR291C	255	197	226	126	125	127	328	205	271	163	136	133	201	122	126	173	119	174	61	61	72	223	209	236	51	35	106	351	283	434	365	316	268	326	334	406	250	322	327	155	152	159	881	320	361	166	216	196
YBR292C	13	11	12	13	9	14	17	14	12	11	9	9	14	11	8	13	17	11	9	7	4	13	10	12	6	6	9	11	22	11	16	14	3	14	6	20	15	8	18	23	13	23	8	3	2	15	18	18
YBR293W	70	69	71	82	73	70	38	48	72	86	95	94	43	45	53	83	91	81	112	62	103	66	67	41	61	71	138	53	108	51	100	73	59	63	72	83	55	74	80	55	59	48	90	49	43	58	55	44
YBR294W	3	3	4	7	1	7	3	0	3	5	6	5	1	0	0	9	6	6	5	5	7	8	12	7	1	3	6	2	5	7	3	4	3	2	2	3	0	4	2	1	0	1	3	0	2	1	1	1
YBR295W	320	294	317	319	260	310	217	326	366	437	332	327	289	271	252	349	341	326	351	285	373	327	330	357	149	130	360	271	412	271	482	286	259	291	277	382	265	261	270	353	382	389	288	115	85	416	407	431
YBR296C	261	227	207	724	566	704	20	26	29	1790	1102	1155	25	12	18	1125	1490	939	11	25	44	8	3	6	34	28	65	31	19	36	32	23	11	11	27	14	13	14	24	43	34	36	1	2	0	43	34	25
YBR296C-A	0	0	0	0	0	0	0	0	0	1	0	0	1	0	0	1	0	0	0	0	0	0	0	0	0	0	2	0	0	0	0	0	0	0	0	0	0	0	0	0	0	2	0	0	0	0	0	0
YBR297W	87	59	68	43	37	44	59	47	71	26	23	22	158	164	152	20	37	24	187	112	136	58	46	67	27	23	64	15	23	17	27	14	27	15	24	22	12	19	17	49	54	62	552	227	224	54	41	73
YBR298C	94	86	94	60	64	37	114	106	107	63	56	49	94	71	109	39	46	44	220	176	187	123	99	109	79	95	186	45	86	43	111	65	72	45	51	76	42	57	63	115	144	135	141	52	54	120	116	140
YBR298C-A	0	0	0	0	0	0	0	0	0	0	0	0	0	0	0	0	0	0	0	0	0	0	0	0	0	0	0	0	0	0	0	0	0	0	0	0	0	0	0	0	0	0	0	0	0	0	0	0
YBR299W	3	3	4	3	4	3	5	5	4	1	4	5	9	3	4	2	3	2	0	0	1	8	5	5	1	1	8	0	1	0	2	2	3	1	0	3	1	2	3	1	4	1	10	3	9	6	5	5
YBR300C	3	2	1	2	0	0	2	3	3	0	0	0	6	6	2	0	0	0	1	1	0	0	1	1	0	0	0	4	1	0	1	0	0	1	1	1	0	0	0	4	5	4	14	6	5	8	6	6
YBR301W	2	2	2	0	0	0	1	0	1	0	0	0	1	3	5	0	0	0	7	6	4	1	0	2	0	1	4	1	8	0	7	3	2	1	1	5	0	4	0	1	4	3	2	0	0	1	2	2
YBR302C	1	1	1	15	11	10	0	0	0	0	0	0	0	0	0	0	0	0	0	0	0	0	0	0	0	0	0	0	0	0	0	0	0	0	0	0	0	0	0	0	0	0	0	0	0	0	0	0
YCL001W	526	509	504	540	481	544	492	440	550	701	608	579	454	520	450	505	526	463	381	348	378	507	426	494	212	194	484	478	879	531	847	744	594	540	608	721	502	522	525	525	593	570	637	199	188	566	546	482
YCL001W-A	3	3	2	5	7	1	2	2	4	5	5	2	3	1	2	5	6	2	6	3	3	7	1	6	0	2	5	2	4	1	3	1	1	3	1	5	1	2	0	2	1	1	5	4	1	1	1	0
YCL001W-B	3	3	2	7	4	4	0	2	2	5	7	0	1	3	6	7	3	2	2	3	1	2	2	4	3	0	3	1	7	4	4	6	1	3	0	5	1	0	0	2	1	0	4	0	5	0	1	0
YCL002C	268	270	275	236	228	256	289	274	314	373	331	304	287	290	261	305	308	310	182	179	197	303	244	295	97	91	249	241	452	301	422	389	341	266	326	368	246	294	295	267	289	252	249	86	95	258	262	281
YCL004W	177	159	161	146	150	140	125	130	172	197	172	163	141	120	146	189	179	168	210	156	186	163	172	172	56	53	198	120	252	114	309	196	135	220	180	252	158	166	150	201	189	178	175	71	59	243	200	176
YCL005W	158	148	151	156	150	182	149	152	183	161	187	170	158	164	124	130	99	140	223	138	157	231	196	216	76	64	148	134	241	121	203	183	155	153	155	164	121	129	147	131	147	147	192	86	68	147	128	140
YCL005W-A	619	606	622	623	624	627	597	591	827	798	730	757	570	684	565	689	653	610	533	596	631	606	532	610	223	215	472	493	964	571	1030	795	797	663	685	797	586	595	614	622	640	654	561	196	189	696	589	615
YCL007C	3	4	3	6	3	2	3	4	2	9	5	8	2	5	0	3	4	3	0	4	4	10	2	4	1	2	3	4	10	7	4	5	2	2	3	4	2	3	0	3	4	4	1	1	0	1	5	3
YCL008C	173	150	163	180	178	162	152	126	168	222	149	181	144	179	159	248	235	224	123	120	147	133	200	202	67	56	184	130	179	176	355	186	122	141	144	182	114	131	130	181	130	171	166	52	53	243	181	185
YCL009C	2479	2399	2550	2587	2572	2800	2278	2131	3004	2359	1499	2318	2332	2848	2365	2093	2030	1648	1453	1849	1694	2314	2842	3567	846	795	1676	2198	3068	2999	4238	3558	2866	2290	2538	2419	2259	2750	2142	3599	3033	3957	2607	799	777	3731	3675	4017
YCL010C	180	157	166	272	232	216	153	170	204	249	170	202	171	176	196	233	240	205	168	129	154	113	139	133	58	53	158	119	180	168	361	183	136	138	143	202	115	137	125	170	158	190	153	56	46	227	191	161
YCL011C	1115	963	990	1490	1295	1238	881	822	1062	1359	932	1002	1013	985	1065	1425	1336	1210	851	899	916	808	797	820	397	316	967	756	1273	1038	2175	1134	844	1032	1053	1297	862	1054	977	1021	899	970	1181	434	367	1473	1219	1072
YCL012C	127	122	118	115	95	77	124	103	142	125	149	128	124	126	103	149	131	98	94	113	79	198	182	212	35	29	82	73	206	93	214	165	116	119	117	185	113	104	127	123	140	156	155	43	40	137	128	133
YCL014W	849	767	832	1128	991	1157	631	631	778	1189	1109	1043	668	690	789	933	1013	1028	845	612	718	1055	859	979	369	352	978	869	1090	794	1204	925	666	773	699	981	594	789	746	776	764	866	871	276	314	830	701	640
YCL016C	152	145	143	141	124	129	117	110	122	166	174	201	115	140	131	151	171	136	161	140	136	177	180	168	67	56	144	124	262	115	223	148	129	141	126	178	130	135	142	193	174	177	188	67	70	193	162	165
YCL017C	1189	1089	1103	1227	988	1188	859	788	1050	1489	1207	1250	848	797	859	1236	1221	1122	1162	942	1131	932	910	956	372	382	900	947	1940	966	2240	1468	1193	1230	1225	1494	1098	1168	1198	1370	1412	1380	1255	505	484	1563	1388	1370
YCL018W	609	572	601	0	0	0	365	450	492	764	622	620	509	453	424	565	484	439	761	537	687	486	488	556	167	235	382	1014	962	952	1369	1109	1002	632	806	992	655	937	841	757	686	704	354	131	116	738	673	805
YCL019W	2	1	2	0	0	0	0	0	1	0	0	0	0	0	0	0	0	0	0	0	0	19	11	8	10	6	17	0	0	1	1	0	0	1	0	0	0	0	0	0	0	0	0	0	0	0	0	0
YCL020W	0	0	0	0	0	0	0	0	0	0	0	0	0	0	0	0	0	0	0	0	0	0	0	0	0	0	0	0	0	0	0	0	0	0	0	0	0	0	0	0	0	0	0	0	0	0	0	0
YCL021W-A	7	7	8	40	21	30	2	3	6	4	9	7	0	6	5	10	5	9	8	11	7	11	8	10	3	5	5	3	9	8	12	7	7	3	6	3	5	5	7	1	2	4	3	3	6	6	0	1
YCL022C	0	0	0	0	0	0	0	0	0	0	0	0	0	0	0	0	0	0	0	0	0	0	1	0	0	0	1	0	0	0	1	0	0	0	0	0	0	0	0	0	0	1	0	0	0	0	0	0
YCL023C	0	0	0	0	0	0	1	0	0	1	0	1	0	0	0	0	2	1	0	0	0	1	0	2	0	0	0	0	1	0	0	0	0	0	0	0	0	0	0	0	1	0	0	0	0	0	0	0
YCL024W	272	258	258	383	356	376	219	220	285	350	324	330	265	230	243	295	319	271	237	198	252	336	387	357	64	105	287	152	321	205	458	225	174	243	253	290	178	258	197	348	291	286	220	99	97	331	286	225
YCL025C	480	440	537	399	412	536	390	431	528	779	646	740	329	355	509	475	610	734	146	167	181	500	430	446	110	158	331	420	414	436	372	286	682	320	253	328	280	267	252	898	899	1002	777	385	366	1006	886	982
YCL026C-A	5	4	5	1	3	5	11	10	11	4	4	2	2	9	8	2	4	6	2	2	5	8	11	9	0	0	6	2	4	4	5	1	0	1	0	2	0	0	0	1	1	1	33	14	12	1	3	5
YCL026C-B	59	49	63	44	36	32	263	255	392	19	13	11	223	190	232	14	13	11	43	34	40	21	11	27	15	26	53	2	16	6	14	5	4	5	11	11	10	4	6	33	30	35	131	56	55	53	35	30
YCL027W	3	3	3	1	2	4	1	3	6	5	7	0	5	3	3	2	2	2	2	0	5	5	8	6	1	1	5	2	5	7	6	3	1	2	3	3	1	1	2	3	2	2	8	0	0	3	2	6
YCL028W	862	779	790	1160	1037	1053	761	706	978	1180	905	920	860	749	887	1115	1098	1037	645	637	767	698	823	748	219	238	693	600	1076	716	1605	876	602	849	869	1021	684	864	780	744	601	602	967	416	341	850	784	705
YCL029C	306	269	271	277	265	254	275	262	297	375	279	299	302	239	266	370	378	333	233	245	311	287	272	273	90	97	228	241	377	247	555	309	223	384	336	437	284	307	294	296	268	228	268	96	93	350	307	283
YCL030C	2283	1928	1918	4545	4212	4045	2576	2286	3016	2438	2089	2120	3393	2943	3062	2087	2292	2080	448	524	658	1698	1449	1642	174	155	404	1422	2003	1588	3003	1561	1410	1261	1305	1741	1080	1424	1391	3188	3004	2429	4024	1181	997	2913	2496	2187
YCL031C	1117	1046	1112	1063	898	1088	1081	1000	1176	1486	1490	1452	949	1068	989	1314	1293	1275	994	920	1008	1222	983	1174	475	457	1196	1069	1603	876	1460	1219	1182	1051	958	1322	982	1066	1126	1035	1208	1211	1430	423	450	1149	1106	1152
YCL032W	187	175	179	143	145	156	110	123	152	227	187	173	145	161	152	191	184	161	209	161	187	176	164	181	70	70	189	155	289	128	290	186	182	198	190	266	178	178	166	255	261	236	194	76	67	268	251	285
YCL033C	58	58	61	100	95	81	49	41	46	55	43	51	39	66	37	54	49	42	63	49	63	73	74	101	15	21	49	35	77	61	112	72	75	34	89	53	41	48	61	53	45	67	86	34	35	56	71	100
YCL034W	253	215	226	351	316	298	182	163	280	382	191	278	196	229	184	381	398	274	213	184	240	154	206	217	100	77	256	120	220	189	548	245	201	184	261	221	133	240	174	270	148	228	221	97	83	356	245	270
YCL035C	260	245	234	439	391	396	222	210	266	297	301	274	198	230	175	260	229	181	309	228	216	182	138	203	76	95	158	141	482	141	373	295	275	199	241	294	216	205	225	252	275	275	452	125	118	279	234	317
YCL036W	419	376	374	397	268	284	350	285	399	492	366	394	405	364	369	564	524	409	323	401	431	395	507	513	132	153	379	318	461	404	794	446	215	421	493	550	338	406	371	429	363	428	365	139	114	556	461	357
YCL037C	2254	1995	2153	2674	2371	2541	1921	1799	2579	2438	2020	2099	2239	2097	2445	2366	2233	2274	1546	1975	2248	1515	1671	1518	838	707	2155	2433	2764	2892	4117	2504	1480	2815	2554	3108	2153	2302	2219	2237	2023	2236	1935	655	585	2578	2245	1919
YCL038C	93	84	88	152	127	159	68	75	80	137	91	117	104	124	113	73	97	76	162	77	78	155	150	130	58	50	109	33	90	30	76	61	60	48	42	62	38	31	52	93	106	95	81	50	34	112	95	128
YCL039W	138	118	125	185	177	190	97	102	132	181	150	189	109	122	103	185	183	163	149	106	130	156	158	178	59	46	119	91	143	79	206	93	97	89	98	97	87	100	91	136	121	130	178	40	26	163	129	150
YCL040W	246	175	193	750	721	601	82	71	86	214	95	118	96	165	88	143	128	96	665	192	246	172	217	285	96	112	240	52	217	62	181	109	284	78	67	79	82	60	85	124	121	122	798	232	201	152	123	304
YCL041C	1	1	1	3	1	3	0	1	0	0	0	0	0	0	0	2	2	0	1	0	1	1	0	3	1	0	4	0	0	0	1	1	1	0	1	2	0	0	1	1	0	2	2	2	2	1	0	1
YCL042W	1	1	1	2	5	4	0	1	2	4	0	0	0	1	0	1	3	0	0	2	0	0	1	0	0	0	1	0	1	1	4	0	0	0	0	0	0	1	1	1	1	1	0	1	0	0	2	3
YCL043C	5922	5454	5882	8214	7788	8172	4944	5021	6510	7861	6068	7002	5598	6020	6213	6269	6116	5353	4116	3568	4315	5097	5391	5839	2576	2308	5544	5669	8036	5953	9599	7051	5913	5078	4978	6384	4627	5491	5409	6182	6074	6606	6142	2007	2048	6858	5897	6962
YCL044C	217	215	221	230	220	246	185	174	216	338	315	302	192	190	209	286	291	280	160	192	203	184	227	192	100	97	244	198	301	212	273	258	176	223	215	300	173	193	207	252	235	214	247	95	96	207	219	217
YCL045C	2215	2055	2155	2758	2403	2736	1858	1812	2267	2400	2484	2259	1942	1864	2097	1957	1957	1855	2182	1939	2164	2399	2276	2184	997	1034	2547	2130	3357	1879	3220	2366	1929	2220	1973	2856	1947	2189	2156	2310	2237	2360	2410	894	943	2495	2036	2094
YCL046W	0	0	0	0	0	0	0	0	0	1	0	2	1	0	0	0	0	0	0	1	0	2	0	2	0	1	1	0	0	0	0	0	0	0	1	0	0	0	0	0	1	0	0	0	0	0	0	0
YCL047C	154	137	139	148	119	122	136	98	130	187	153	147	110	109	127	146	156	104	192	134	148	268	208	206	64	67	138	110	237	114	223	178	150	138	125	188	128	125	157	116	147	148	210	84	77	134	121	133
YCL048W	3	3	3	3	0	2	2	1	1	3	4	8	2	3	3	4	5	1	3	1	5	5	9	9	3	1	4	1	7	1	8	3	3	2	1	3	1	3	0	0	1	1	0	0	0	2	1	4
YCL048W-A	0	0	0	1	1	0	0	0	1	0	1	0	0	0	0	0	1	0	0	0	1	1	1	1	1	0	1	0	0	0	0	0	0	0	1	0	0	0	0	0	0	0	0	0	0	0	0	0
YCL049C	300	268	281	112	66	111	115	139	149	625	526	542	67	72	50	500	516	474	384	212	260	495	439	526	124	106	319	289	667	320	644	436	456	413	358	469	364	343	352	26	24	24	306	100	103	36	20	57
YCL050C	1837	1693	1807	2087	1970	2118	1860	1785	2230	1896	1877	1668	2072	1913	2152	1820	1719	1497	1786	1669	1930	2094	1764	1941	603	600	1613	1845	2595	2030	2843	1874	1615	1803	1782	2491	1677	1817	1853	1714	1569	1644	1662	656	657	1797	1808	1660
YCL051W	279	265	272	325	261	330	246	265	293	330	322	297	242	265	279	297	334	306	266	264	259	344	331	361	106	111	316	174	347	163	391	259	216	257	247	310	215	237	251	297	298	292	302	127	94	394	308	314
YCL052C	371	361	362	374	377	362	325	309	379	463	485	394	363	379	355	390	412	301	408	267	335	461	405	448	126	154	339	291	594	286	637	405	429	296	336	492	320	350	387	325	380	310	392	177	186	393	388	424
YCL054W	1960	1747	1867	1774	1362	1491	1529	1531	1655	2210	1972	1605	1728	1581	1795	2002	1834	2124	1778	2092	2024	2046	1991	2205	757	687	2017	1830	2466	1796	3046	1937	1601	2479	1949	2816	1924	2061	2081	2199	1994	1902	1670	664	608	2431	2084	2279
YCL055W	165	171	168	161	156	146	127	124	155	219	206	190	153	175	144	134	161	131	170	160	164	214	180	222	76	85	200	164	336	157	264	222	201	153	184	240	151	155	160	140	205	172	189	67	61	163	152	182
YCL056C	46	46	47	45	37	55	23	36	43	69	47	40	54	73	37	53	38	42	49	43	31	55	49	47	8	12	34	27	65	37	71	67	67	39	49	70	38	51	62	50	51	52	53	19	19	54	55	64
YCL057C-A	212	209	205	178	160	154	133	120	150	296	178	221	127	190	119	226	227	150	164	194	230	189	167	220	93	82	257	97	392	205	533	369	291	230	301	298	219	262	244	180	171	218	304	99	108	210	218	206
YCL057W	1319	1176	1244	2021	1791	1716	1074	973	1351	1327	1227	1107	1242	1018	1454	1220	1209	934	1368	1182	1528	1558	1381	1434	497	570	1411	985	1694	1009	2231	1293	1010	1089	1095	1558	991	1073	1157	1275	1260	1274	1278	551	596	1625	1318	1117
YCL058C	120	126	118	114	77	93	57	95	105	130	99	92	77	89	72	117	105	85	101	122	139	120	98	126	59	58	151	64	285	92	283	210	158	137	177	213	125	151	143	133	111	146	150	70	41	131	148	109
YCL058W-A	28	26	26	26	21	21	26	29	29	40	20	26	28	30	28	33	31	31	24	33	22	27	27	23	6	5	28	25	21	16	47	53	21	22	20	42	30	35	38	32	24	32	23	9	6	36	39	30
YCL059C	1375	1313	1356	1149	915	1145	1185	1249	1350	1540	1412	1360	1226	1274	1176	1452	1396	1429	1124	1478	1330	1482	1254	1423	518	505	1197	1467	2098	1390	2096	1679	1416	1685	1578	1929	1477	1444	1497	1404	1432	1600	1359	463	431	1467	1522	1661
YCL061C	484	445	439	636	502	570	345	381	472	570	572	517	511	368	466	569	608	481	560	480	583	477	588	539	112	137	374	342	540	324	794	411	287	450	436	549	365	536	395	538	487	498	441	181	162	545	452	370
YCL063W	400	361	363	347	331	306	357	358	443	492	474	451	412	383	450	508	553	411	309	302	293	399	357	345	146	143	278	332	519	314	653	369	353	406	337	447	315	327	376	424	429	424	397	128	160	499	404	395
YCL064C	1576	1500	1483	4008	3522	3635	1459	1242	1829	694	702	585	1126	1234	1527	619	634	408	968	586	737	235	281	232	816	644	2596	916	2240	1062	3040	2193	1118	1099	1440	1867	850	1335	1258	2905	2699	2828	1198	469	439	3707	3273	2125
YCL065W	0	0	0	0	0	0	0	0	0	0	0	0	0	0	0	0	0	0	0	0	0	0	0	0	0	0	0	0	0	0	0	0	0	0	0	0	0	0	0	0	0	0	0	0	0	0	0	0
YCL066W	0	0	0	0	0	0	0	0	0	0	0	0	0	0	0	0	0	0	0	0	0	0	0	0	0	0	0	0	0	0	0	0	0	0	0	0	0	0	0	0	0	0	0	0	0	0	0	0
YCL067C	0	0	0	0	0	0	0	0	0	0	0	0	0	0	0	0	0	0	0	0	0	0	0	0	0	0	0	0	0	0	0	0	0	0	0	0	0	0	0	0	0	0	0	0	0	0	0	0
YCL068C	0	0	0	0	0	0	0	0	0	0	0	0	0	0	0	0	0	0	0	0	0	0	0	0	0	0	0	0	0	0	0	0	0	0	0	0	0	0	0	0	0	0	0	0	0	0	0	0
YCL069W	0	1	0	0	0	0	0	0	0	1	2	0	0	0	0	0	2	0	0	0	1	3	2	3	0	0	0	0	0	0	0	0	0	0	1	0	1	1	2	0	0	0	0	0	0	0	0	0
YCL073C	0	0	0	0	0	0	0	0	0	1	0	0	0	0	3	1	0	0	0	0	1	0	1	2	1	0	0	0	0	0	0	0	0	0	1	0	0	0	0	0	0	0	0	0	0	0	0	0
YCL074W	3	2	2	0	0	0	0	0	0	0	0	0	32	18	15	0	0	0	0	0	0	13	6	8	1	0	0	0	0	0	0	0	0	0	0	0	0	0	0	2	0	0	0	0	0	0	0	0
YCL075W	1	1	0	0	0	0	0	0	0	0	0	0	12	11	6	0	0	0	0	1	0	3	8	0	0	0	0	0	0	0	0	0	0	0	0	0	0	0	0	0	0	0	0	0	0	0	0	1
YCL076W	0	0	0	0	0	0	0	0	0	0	0	0	0	0	1	0	0	0	0	0	0	0	0	1	0	0	0	0	0	0	0	0	0	0	0	0	0	0	0	0	0	0	0	0	0	0	0	0
YCR001W	0	0	0	1	0	0	0	1	0	0	0	0	0	0	0	0	0	0	0	0	0	1	0	0	0	0	0	0	0	0	1	0	0	0	0	0	0	0	0	0	0	0	3	1	0	0	0	0
YCR002C	676	627	644	770	651	769	552	522	696	874	755	694	532	608	551	770	771	642	590	555	577	692	623	606	299	252	731	496	996	512	1032	720	702	677	667	890	661	632	695	623	634	572	855	322	340	716	703	676
YCR003W	288	265	257	168	147	200	163	153	151	326	294	262	149	169	173	259	219	191	549	249	302	223	213	240	117	92	274	146	534	135	463	392	369	268	277	343	250	240	281	428	464	429	365	150	111	439	388	396
YCR004C	641	583	584	1184	1085	1024	512	490	616	753	601	561	564	535	577	654	642	483	747	525	647	653	680	698	224	269	664	348	827	371	1058	654	518	538	551	700	463	460	517	581	520	544	627	275	285	716	627	551
YCR005C	304	306	300	725	783	868	265	470	451	197	162	165	143	256	270	153	188	156	782	341	338	273	178	214	70	97	217	179	598	152	416	219	499	255	358	289	200	297	236	222	227	230	391	159	129	293	256	281
YCR006C	40	40	43	30	29	48	16	30	33	56	59	47	25	33	28	50	52	46	48	33	52	34	34	42	24	16	70	45	81	42	70	59	52	47	47	58	54	45	54	40	35	29	15	7	13	45	42	32
YCR007C	52	52	52	37	37	33	18	15	32	46	30	38	21	41	25	49	36	36	44	38	41	23	25	29	7	7	33	41	207	51	119	58	75	93	69	84	53	63	67	84	58	66	25	7	6	115	84	164
YCR008W	1272	1189	1201	1256	1061	1146	1025	1027	1302	1565	1504	1362	1123	1022	1171	1362	1385	1264	1114	951	1059	999	974	978	466	442	1256	1205	2049	1130	2156	1474	1193	1353	1343	1764	1226	1467	1302	1445	1322	1385	1314	470	445	1471	1350	1265
YCR009C	871	848	846	1063	942	1090	698	689	777	1113	1150	1055	642	792	689	916	945	846	880	796	882	786	635	682	240	261	690	721	1594	633	1315	1044	1053	914	842	1184	844	863	933	982	931	970	916	338	300	1041	904	908
YCR010C	2	2	3	4	5	16	1	1	2	4	2	2	3	5	2	2	2	2	2	3	1	3	2	3	3	1	0	2	3	5	1	3	1	2	0	3	1	5	2	3	1	2	1	0	1	3	2	1
YCR011C	873	825	814	1574	1436	1679	573	599	736	1089	979	946	664	642	689	854	835	646	1098	647	750	990	901	861	358	363	930	592	1250	557	1106	904	712	647	632	895	603	758	712	921	1026	898	1061	425	420	971	983	780
YCR012W	44660	40414	42139	47955	46383	48442	38733	36809	44570	53170	44476	48082	39333	42031	41532	39794	37726	32393	71524	34951	38896	29285	29218	30361	12924	10639	24134	48310	67255	54332	65800	57938	61600	39072	43800	49576	40066	41367	43364	44781	45953	45214	52139	19109	19733	47011	48552	49856
YCR013C	7	6	8	10	5	6	7	10	11	12	11	14	4	4	8	10	11	11	10	3	6	13	9	7	1	0	4	9	2	9	5	8	10	7	6	7	4	6	7	6	3	11	5	4	0	7	9	6
YCR014C	135	119	123	177	180	179	100	116	118	206	165	155	132	105	109	188	160	171	157	125	133	178	156	176	63	63	161	51	114	69	152	86	60	96	70	113	71	88	90	166	139	130	116	62	53	170	161	126
YCR015C	146	133	134	167	141	130	116	98	137	205	174	157	106	112	120	162	145	127	155	110	104	146	128	136	34	35	116	103	270	102	266	175	189	155	157	212	129	162	156	131	127	134	156	59	58	155	109	131
YCR016W	571	526	545	531	425	479	483	483	567	708	672	633	488	476	469	671	640	647	490	469	455	707	595	678	211	222	464	518	832	495	847	673	534	656	590	842	594	563	606	511	530	530	545	198	197	599	524	585
YCR017C	1725	1610	1725	2137	1884	2307	1512	1520	1831	2130	2019	1940	1509	1479	1534	1404	1621	1673	1771	1155	1325	1706	1561	1697	843	928	1930	1598	2629	1473	2585	2068	1947	1755	1576	1995	1474	1543	1819	1774	1902	1857	1832	683	724	1839	1584	1817
YCR018C	7	7	8	19	12	32	3	4	5	6	8	5	1	4	2	4	12	7	7	4	7	10	5	7	2	4	5	2	13	3	11	5	8	13	9	11	4	6	13	6	4	11	8	1	3	7	9	6
YCR018C-A	4	3	3	6	10	8	1	0	6	8	4	4	5	3	2	3	1	2	3	3	2	5	6	1	1	0	4	2	1	1	9	3	4	1	2	3	2	1	0	3	0	3	7	3	1	3	4	2
YCR019W	144	140	143	163	139	134	141	130	163	135	141	128	151	160	154	113	140	124	132	104	128	169	168	180	76	73	180	114	210	102	197	143	115	120	135	141	94	108	127	188	190	190	165	72	65	206	190	220
YCR020C	82	83	79	56	42	53	47	59	54	126	103	104	37	48	41	108	107	82	147	181	269	73	64	56	32	51	76	44	98	42	112	75	55	75	63	59	60	48	53	124	151	137	75	32	24	114	128	86
YCR020C-A	91	88	91	89	97	100	80	84	111	126	107	113	89	88	73	77	89	70	83	77	75	119	100	123	24	20	75	62	121	77	152	115	102	92	123	126	85	77	93	81	94	97	115	35	27	94	100	109
YCR020W-B	116	123	118	96	93	124	100	93	119	123	144	139	105	119	112	105	98	83	90	116	117	155	154	147	21	25	83	148	219	121	176	172	137	128	174	186	117	139	127	106	138	131	138	20	18	131	139	125
YCR021C	213	241	196	216	315	416	41	196	140	47	64	69	78	562	64	39	27	82	34	48	33	55	73	152	64	52	140	18	1143	29	651	192	325	306	178	245	276	295	410	275	161	194	785	82	70	311	230	574
YCR022C	3	3	3	5	2	3	3	2	4	2	0	1	3	4	2	2	1	1	0	1	1	8	7	8	1	0	1	2	7	4	2	2	4	3	2	1	8	4	4	3	1	2	2	3	4	2	2	4
YCR023C	340	322	312	366	317	378	281	269	326	366	353	359	292	291	272	280	307	264	412	290	338	419	317	346	91	110	246	253	543	217	502	415	338	272	292	309	269	312	290	414	416	437	483	181	201	393	419	363
YCR024C	181	165	162	146	128	103	100	122	141	180	190	185	93	118	138	202	169	109	288	160	216	194	161	162	75	80	192	79	296	110	314	204	155	167	174	214	166	163	147	240	201	213	212	95	85	261	208	254
YCR024C-A	1789	1832	1827	2154	1853	2292	1184	1222	1570	2609	2582	2338	1174	1818	1510	1807	1966	1743	1896	1843	1704	1600	1607	1755	675	554	1767	2017	2979	2030	2716	3040	2184	2135	2160	2474	1649	1875	2072	1471	1500	1781	2138	545	622	1607	1938	1562
YCR024C-B	2973	2885	3108	3325	2676	3825	2709	2456	3115	3806	3863	3462	2283	2868	3157	2679	2788	2758	2830	2581	2634	2839	2360	2879	1411	1415	2771	3291	4753	2958	4375	4238	3556	3233	3104	3995	2798	3048	3368	3031	2868	3633	3006	1305	1326	2976	2956	3180
YCR025C	11	11	13	7	7	14	15	11	15	13	4	7	9	5	16	8	9	12	9	13	19	14	18	11	10	11	29	10	18	13	17	19	7	10	7	7	5	14	13	8	16	13	14	8	4	16	11	10
YCR026C	431	416	422	520	459	481	349	414	452	568	520	498	382	404	404	506	482	431	424	353	392	447	467	468	176	174	496	271	590	300	603	418	325	385	416	520	336	406	392	486	458	499	484	166	174	530	514	498
YCR027C	162	152	157	158	129	135	118	148	172	182	215	172	137	131	143	162	165	137	201	151	159	192	125	146	73	77	194	93	255	114	251	165	158	163	142	201	141	137	177	175	165	186	201	86	82	190	185	185
YCR028C	393	368	367	401	308	388	318	326	340	676	563	531	361	295	317	487	476	526	346	274	277	354	356	364	130	167	334	327	599	291	521	455	356	402	347	463	317	361	393	404	430	434	433	134	125	425	423	360
YCR028C-A	866	832	866	926	858	972	738	722	927	1065	950	903	709	789	736	874	760	695	804	642	752	825	641	844	284	245	598	783	1600	728	1327	1157	1159	865	957	1305	924	849	1085	900	997	988	1088	384	334	885	933	962
YCR030C	640	608	654	634	583	835	481	548	686	772	744	773	531	593	650	502	568	533	695	508	633	868	827	794	278	305	855	539	936	484	883	678	565	559	505	727	476	612	593	698	731	748	988	365	359	694	614	575
YCR031C	15801	15144	15866	13056	12117	13743	14452	13396	17155	18040	16861	17365	14648	16042	14318	14046	12652	11984	12985	13448	13883	12882	10859	12980	5870	5527	13057	17537	26173	18186	26395	22624	21176	17464	19212	22876	17744	16311	19435	16402	17761	18237	18488	6753	6275	17004	17428	17313
YCR032W	708	662	687	935	859	902	592	632	727	882	876	749	555	597	731	747	723	685	838	600	690	811	740	746	270	309	796	496	936	525	1000	645	556	710	629	831	506	650	677	779	752	785	683	256	285	813	727	625
YCR033W	940	821	849	1350	1234	1072	782	792	1028	1117	1007	962	789	677	840	1220	1355	1053	766	671	851	822	750	893	316	323	886	650	1113	701	1856	791	693	969	842	1082	734	841	795	869	751	796	806	318	325	1052	846	753
YCR034W	1876	1838	1862	1525	1317	1576	1523	1530	1774	2396	2378	2209	1510	1678	1682	1827	1881	1807	1300	1586	1578	1681	1494	1546	899	759	1845	2075	3350	2034	3205	2647	2311	2359	2187	2749	2138	2233	2249	1902	1914	1928	1998	767	733	1803	1855	1912
YCR035C	645	630	642	590	483	579	576	565	672	743	779	677	621	611	517	714	667	643	574	579	533	715	677	738	312	283	634	643	1065	592	1007	770	702	629	669	965	669	617	748	601	740	700	570	236	233	704	707	700
YCR036W	271	259	262	361	346	315	275	266	313	321	318	260	288	288	262	290	242	228	352	203	255	293	258	229	151	111	276	184	419	177	350	271	237	201	200	316	178	229	263	259	316	288	284	117	132	284	307	373
YCR037C	1097	1020	1047	555	519	505	910	871	1106	1252	1244	1100	817	808	976	1063	1162	1062	1528	1204	1328	1059	990	1032	491	556	1310	989	1599	929	1611	1247	886	1186	1000	1378	966	1103	1105	1278	1219	1276	1376	551	500	1378	1234	1213
YCR038C	68	67	66	98	92	106	61	50	75	78	81	56	50	54	77	78	72	86	88	64	61	77	90	63	20	25	74	47	103	48	101	70	42	65	74	89	57	71	61	63	71	60	65	22	36	78	69	57
YCR038W-A	0	0	0	1	0	0	0	0	0	0	0	0	0	0	0	0	0	0	0	0	0	0	0	0	0	0	0	0	0	0	0	0	1	0	0	0	0	0	0	0	0	0	0	0	0	0	0	0
YCR039C	0	0	0	0	0	0	0	0	0	0	0	0	0	0	0	0	0	0	0	0	0	0	0	0	0	0	0	0	0	0	0	0	0	0	0	0	0	0	0	0	0	0	0	0	0	0	0	0
YCR040W	0	0	0	0	0	0	0	0	0	0	0	0	0	0	0	0	0	0	0	0	0	0	0	0	0	0	0	0	0	0	0	0	0	0	0	0	0	0	0	0	0	0	0	0	0	0	0	0
YCR041W	2	1	2	6	1	6	3	1	4	0	1	2	0	1	2	0	1	0	2	2	2	7	2	2	2	1	2	1	3	1	0	2	1	2	0	1	1	0	2	0	0	2	1	0	1	3	0	0
YCR042C	514	465	491	701	613	677	361	426	500	755	584	500	394	383	476	625	724	625	508	425	469	556	524	549	228	187	592	339	561	361	758	454	349	449	350	562	316	416	452	555	539	531	477	179	174	687	614	555
YCR043C	405	383	393	365	355	373	402	380	477	576	554	473	414	425	387	469	476	449	281	307	355	440	350	397	141	122	264	413	607	390	575	459	443	412	407	520	398	381	391	369	404	397	438	155	140	376	370	433
YCR044C	321	305	299	344	340	365	276	274	319	421	392	350	306	331	313	339	301	258	368	283	266	358	279	278	158	160	319	255	522	275	463	414	389	280	332	393	326	301	339	217	233	230	467	157	179	244	256	215
YCR045C	1	1	1	1	3	1	0	1	0	1	0	2	0	1	2	2	0	2	1	1	5	1	0	2	2	1	0	0	0	1	0	0	0	1	0	0	0	0	2	1	0	0	1	1	1	0	1	1
YCR045W-A	30	26	28	38	38	42	22	16	35	32	22	40	27	30	21	40	37	27	26	27	29	23	31	34	16	14	23	13	23	34	59	30	21	18	27	13	14	22	26	41	17	31	34	18	19	45	42	31
YCR046C	190	154	162	192	210	173	119	88	169	251	118	214	105	125	136	328	262	204	194	148	197	89	150	150	92	84	176	48	154	108	445	202	137	93	166	111	104	107	103	236	115	206	172	62	73	385	314	268
YCR047C	262	218	234	291	264	214	182	165	253	361	149	228	210	255	216	468	402	429	138	248	262	110	213	214	117	61	266	145	213	276	617	266	171	259	278	225	180	244	177	238	143	223	237	86	66	371	282	286
YCR047W-A	0	0	0	0	0	1	0	2	0	0	1	0	0	0	0	0	0	0	0	0	0	0	1	0	0	0	0	0	0	0	0	1	0	0	1	0	0	0	0	0	0	0	0	0	0	1	0	0
YCR048W	417	367	404	710	658	604	342	292	411	583	397	534	356	423	374	532	515	455	251	220	215	232	355	391	155	140	338	369	443	475	847	525	483	305	308	362	245	353	345	426	367	446	382	106	104	518	409	520
YCR049C	0	0	0	0	0	1	0	0	0	0	0	0	0	0	0	0	0	0	0	0	0	0	0	3	0	0	0	0	0	0	0	0	0	0	0	0	0	0	1	0	0	0	0	0	0	0	0	0
YCR050C	0	0	0	0	0	0	1	0	0	0	0	0	0	0	0	0	0	1	0	0	0	1	1	0	0	0	0	0	0	0	0	0	0	0	0	0	1	1	1	0	0	0	1	0	0	0	0	0
YCR051W	296	241	280	426	405	368	303	239	396	341	86	254	289	400	226	498	442	390	142	194	243	84	269	320	135	80	281	126	108	340	718	268	197	151	196	180	101	171	123	320	143	327	228	79	63	585	529	493
YCR052W	512	438	470	884	778	762	481	447	593	524	427	434	510	497	580	662	715	528	326	411	507	424	498	460	173	141	418	340	439	417	914	366	273	431	368	536	356	318	384	529	425	448	385	179	153	748	567	558
YCR053W	3633	3293	3451	4807	4345	5046	3275	3197	3937	4316	3676	3324	3298	3142	3844	3407	3664	3550	2588	2151	2427	2441	2394	2389	992	860	2558	3747	4878	3586	5937	4264	3404	4412	3956	5618	3819	4379	4058	3740	3553	3487	3340	1177	1046	4369	3755	3495
YCR054C	282	268	269	314	255	270	247	218	303	252	251	246	210	217	231	249	239	202	300	259	293	415	411	390	150	136	303	232	465	244	444	302	222	303	263	366	265	293	280	265	262	276	294	135	142	293	317	270
YCR057C	2657	2281	2443	2446	2099	2091	2479	2304	2822	3087	2426	2382	2560	2026	2459	3100	2876	2881	1997	2402	2339	2484	2665	2680	1005	855	2418	2485	3090	2457	4626	2433	1907	2867	2495	3522	2343	2437	2536	2775	2627	2582	2197	784	811	3403	2689	2756
YCR059C	208	180	194	299	264	253	187	158	209	292	145	239	180	223	179	262	244	245	153	165	170	124	221	265	47	54	120	123	195	198	436	238	157	127	186	189	128	146	140	225	143	212	225	79	62	308	241	276
YCR060W	80	73	82	104	87	125	115	121	128	91	41	78	107	99	106	72	60	53	60	54	66	46	57	69	18	18	54	46	83	46	116	85	78	62	59	75	49	64	62	114	107	124	76	16	18	120	145	151
YCR061W	189	159	181	220	235	202	133	112	187	240	177	242	142	160	173	206	199	155	335	178	208	170	215	271	109	86	201	141	194	157	289	181	130	108	110	149	92	137	155	197	171	200	206	80	82	244	148	196
YCR063W	69	62	64	63	67	63	45	36	59	112	81	91	52	65	54	92	104	100	71	64	66	61	57	64	50	23	98	32	70	48	113	73	43	61	69	81	48	56	44	62	59	55	95	29	23	82	70	66
YCR064C	4	3	4	2	4	2	5	3	8	4	3	7	4	2	4	4	2	2	1	2	2	6	2	6	0	0	0	2	4	6	5	3	1	4	4	3	0	2	5	4	2	4	8	4	3	5	3	1
YCR065W	420	379	386	582	501	529	414	380	484	495	415	443	435	284	349	434	507	423	419	363	429	329	386	332	124	126	414	273	472	304	634	369	335	408	355	474	338	395	353	490	457	420	477	160	146	450	508	359
YCR066W	139	128	136	146	98	154	112	113	127	173	156	131	132	110	109	123	146	127	146	121	137	207	172	211	52	69	151	111	220	127	229	154	133	127	113	227	119	146	119	144	112	110	104	47	51	153	136	123
YCR067C	1296	1191	1288	1319	1216	1388	976	1130	1233	1305	1289	1235	943	974	1195	1020	1045	965	1526	1103	1273	1457	1304	1406	697	659	1597	1363	2018	1156	1897	1539	1313	1421	1058	1604	1251	1292	1406	1428	1489	1565	1377	476	544	1467	1270	1437
YCR068W	125	111	120	193	200	195	102	113	129	154	95	148	111	102	121	112	105	88	174	102	144	128	147	160	68	55	153	90	147	93	201	128	104	88	97	106	81	99	100	117	113	118	113	40	46	141	127	93
YCR069W	451	410	432	682	618	674	394	332	494	608	605	587	368	368	370	487	493	457	595	350	402	468	385	401	161	173	441	376	648	361	623	492	447	343	359	479	335	386	344	417	378	423	474	160	180	428	402	413
YCR071C	218	192	194	155	126	147	81	109	103	206	215	158	128	108	104	198	187	147	405	180	244	174	143	148	93	71	261	75	384	101	418	270	288	215	224	317	244	208	243	297	262	254	238	106	117	338	294	282
YCR072C	943	829	865	858	643	654	864	810	957	1213	991	830	940	733	882	1249	1282	1072	722	825	804	1042	1058	1172	350	296	820	867	965	935	1631	883	604	912	913	1251	713	862	897	946	797	858	627	280	265	1216	1092	978
YCR073C	267	227	253	326	295	224	237	240	286	406	341	312	288	242	259	368	397	455	385	274	323	233	261	218	102	81	251	148	227	152	358	161	180	196	135	210	134	143	150	336	282	300	160	56	52	332	273	418
YCR073W-A	169	144	152	304	249	206	134	107	171	187	152	149	97	137	118	231	228	142	152	161	184	102	129	150	72	62	169	77	183	154	372	160	149	103	117	144	92	115	144	164	144	163	163	53	47	280	157	183
YCR075C	81	76	75	101	98	109	55	54	82	133	128	127	63	62	66	121	91	89	78	68	73	83	68	76	25	32	79	47	122	45	113	100	74	56	62	83	64	58	61	93	71	68	103	39	32	76	85	66
YCR075W-A	69	68	68	80	73	92	57	63	66	76	68	63	64	75	68	59	50	37	97	62	56	79	78	78	32	18	62	38	105	41	76	96	70	65	60	99	56	82	64	83	84	107	71	21	30	95	79	94
YCR076C	61	57	60	96	101	110	47	39	58	54	56	51	62	53	60	46	46	36	74	40	58	74	96	75	29	30	43	45	81	43	98	79	64	41	57	82	56	52	64	50	42	41	99	34	46	42	54	66
YCR077C	1770	1513	1584	1991	1777	1558	1390	1358	1699	2232	1758	2106	1182	1274	1285	2319	2400	1998	1482	1226	1289	1323	1299	1540	618	546	1518	1593	2114	1661	3607	1829	1587	1414	1374	1692	1283	1491	1437	1849	1744	1955	1982	600	602	2282	1905	1828
YCR079W	114	103	107	122	119	123	79	77	96	144	105	114	87	86	78	101	125	97	140	90	126	141	114	132	51	53	130	71	163	98	184	130	132	114	96	98	93	94	111	104	101	115	163	57	39	121	137	119
YCR081C-A	1	1	1	0	1	2	3	3	2	1	3	1	1	2	0	0	1	0	1	0	0	0	1	2	0	1	1	2	1	0	0	3	0	3	2	1	1	0	0	2	2	0	0	0	0	3	0	1
YCR081W	510	472	481	710	630	637	343	405	475	537	511	458	451	386	518	540	560	491	508	410	476	670	661	655	196	210	551	456	686	432	839	525	356	502	438	599	396	508	453	490	478	497	514	173	183	505	499	438
YCR082W	357	322	345	484	432	491	293	267	383	398	382	379	358	325	373	320	297	248	366	251	311	443	340	387	155	109	296	341	531	344	474	412	353	298	308	470	292	308	317	339	360	396	373	143	112	416	366	316
YCR083W	97	88	86	143	113	109	75	68	92	80	77	67	90	103	75	88	68	70	87	94	85	167	147	139	18	22	67	55	153	57	144	71	86	77	105	123	97	55	81	104	91	94	111	46	30	116	102	112
YCR084C	2277	2025	2140	2400	2231	2067	1903	1855	2204	2576	2522	2716	1782	1787	2029	2485	2451	2310	2072	1812	2091	1793	1755	1904	1017	858	2107	2071	3092	2024	4280	2614	2259	2161	1874	2586	2003	2070	2181	2490	2462	2684	2428	800	800	2691	2192	2145
YCR085W	1	1	1	1	1	1	2	0	0	1	1	1	1	1	0	2	1	1	0	1	3	2	0	2	1	0	1	0	1	0	1	0	1	1	1	2	0	0	0	1	1	3	0	0	0	1	0	0
YCR086W	72	68	66	102	90	72	54	54	74	86	89	105	51	49	60	87	79	62	82	55	77	92	74	71	24	28	71	50	119	53	100	83	72	80	80	75	61	53	70	63	65	50	67	39	17	76	65	56
YCR087C-A	330	291	309	224	182	205	280	282	294	443	269	309	351	394	351	395	362	387	160	192	174	330	319	373	70	57	178	337	426	382	673	381	311	329	382	410	276	302	354	377	353	388	332	79	90	377	392	423
YCR087W	2	2	2	2	2	2	2	1	2	1	4	2	1	2	1	4	2	1	3	2	1	2	0	3	0	3	2	0	3	2	3	1	2	1	2	3	3	1	0	2	2	0	0	1	1	4	2	3
YCR088W	1146	1001	1025	2476	2239	2102	977	882	1262	1480	1432	1299	848	747	814	1599	1565	1291	967	913	1091	595	704	701	337	360	1073	734	1203	884	2223	916	664	971	802	1168	707	849	865	1137	981	1033	759	302	327	1383	1122	800
YCR089W	157	147	157	172	156	188	141	137	178	254	284	309	123	98	153	189	193	226	135	93	156	168	151	139	70	63	147	119	194	98	170	176	120	152	125	134	139	143	110	179	173	176	174	74	72	163	146	146
YCR090C	435	407	446	381	371	413	376	385	462	516	515	528	377	449	431	433	399	344	454	372	441	542	396	500	339	281	716	400	628	407	585	492	491	346	393	497	384	353	368	371	483	452	586	188	200	441	403	446
YCR091W	57	45	53	102	62	78	66	37	54	74	57	61	40	39	54	65	54	72	61	52	57	72	58	73	30	38	82	24	66	19	65	40	36	40	37	57	34	34	41	46	29	37	79	32	34	53	47	41
YCR092C	273	252	251	428	356	317	224	216	277	314	286	255	240	210	269	330	350	317	245	242	251	248	200	252	87	112	246	207	357	210	501	282	212	250	259	319	215	249	227	246	263	256	227	94	101	337	301	262
YCR093W	5102	4565	4919	5848	5210	5679	4426	4572	5784	5966	5280	5226	4769	4163	5706	5005	5443	5313	5187	4373	4935	4710	4556	4823	1739	1927	5595	4817	6295	4219	7922	5036	3859	5380	4649	6220	4330	4964	4596	5531	5258	5656	4676	1679	1692	6227	5066	4489
YCR094W	264	241	238	358	312	308	207	181	221	334	287	258	205	193	258	313	355	257	246	184	234	240	249	214	122	107	252	188	347	228	460	243	223	243	301	299	211	235	232	262	259	249	276	101	101	298	261	241
YCR095C	212	204	217	210	199	228	113	160	177	248	209	223	162	183	164	209	215	175	206	177	181	285	231	234	94	53	229	225	439	224	316	245	305	227	218	325	211	212	254	228	237	213	240	78	86	213	211	241
YCR095W-A	9	9	9	11	14	17	7	6	6	11	12	12	9	14	12	9	10	10	12	7	6	11	9	14	0	0	7	3	15	4	23	8	6	10	15	18	7	12	10	9	5	13	9	1	1	10	7	6
YCR096C	0	0	0	0	0	0	0	0	0	0	0	0	0	0	0	0	0	0	0	0	0	0	0	0	0	0	0	0	0	0	0	0	0	0	0	0	0	0	0	0	0	0	0	0	0	0	0	0
YCR097W	100	94	102	135	95	113	75	71	122	160	125	138	77	92	89	111	108	94	69	62	73	116	73	119	18	13	60	81	175	82	141	142	135	98	96	122	107	107	114	88	98	126	122	34	28	96	112	119
YCR097W-A	1	0	1	0	0	0	0	0	0	1	0	0	0	0	0	1	0	0	0	0	0	0	0	1	0	0	0	0	0	0	0	1	0	0	0	1	0	0	1	4	1	3	1	0	1	3	4	6
YCR098C	33	31	30	23	17	16	24	35	36	37	35	33	57	62	44	28	29	31	44	21	28	31	24	18	67	40	76	13	17	11	19	32	22	7	14	14	14	15	12	55	58	50	12	9	9	59	55	52
YCR099C	13	13	13	13	22	23	8	6	10	10	24	12	34	41	36	9	11	9	9	5	5	7	8	8	0	0	2	4	6	2	12	3	6	2	1	4	4	5	3	21	27	35	21	13	4	38	17	30
YCR100C	39	41	35	66	51	58	7	8	15	18	31	22	64	67	55	18	22	25	11	22	10	18	21	15	1	1	4	42	91	48	88	61	43	50	53	66	43	57	49	55	45	43	34	19	15	69	62	56
YCR101C	21	22	18	42	34	33	12	12	7	38	29	30	37	51	46	17	27	20	19	12	8	13	12	14	1	1	0	8	12	4	17	7	10	7	8	12	11	18	12	29	41	30	30	19	11	39	43	38
YCR102C	1458	1374	3812	23	10	25	43	88	61	49	55	62	50	52	48	30	18	35	9	3	9	378	381	433	21149	19846	56302	13	33	44	38	11	29	12	22	26	14	19	18	29	38	40	12	13	11	24	28	30
YCR102W-A	4	3	3	2	1	1	7	13	5	1	2	5	4	2	5	1	1	1	5	3	1	34	19	19	1	0	4	1	2	1	0	0	1	0	0	1	0	2	0	0	1	4	1	0	0	3	1	0
YCR104W	1	1	1	2	0	2	2	1	4	1	1	2	2	2	4	3	6	2	0	0	0	0	0	0	0	0	0	0	0	0	1	0	0	0	0	0	0	0	2	1	0	0	0	0	0	0	2	0
YCR105W	15	11	11	2	1	2	9	7	5	51	35	42	12	17	12	40	30	30	0	0	0	12	10	7	0	0	0	2	9	1	5	1	5	7	2	5	2	3	5	14	16	22	45	15	10	17	13	15
YCR106W	314	275	260	196	133	103	209	200	226	761	726	704	343	321	347	740	786	674	0	0	1	161	159	167	0	0	0	163	267	139	343	196	146	169	163	235	153	161	192	443	456	426	560	198	206	465	360	331
YCR107W	107	95	88	87	53	51	105	106	112	229	222	182	181	168	178	207	213	196	0	0	0	37	40	30	0	0	0	36	85	49	94	51	50	61	46	69	44	68	57	190	186	158	156	45	51	180	148	139
YCR108C	0	0	0	0	0	0	0	0	0	0	0	0	0	0	0	0	0	0	0	0	0	0	0	0	0	0	0	0	0	0	0	0	0	0	0	0	0	0	0	1	0	0	2	0	0	0	2	1
YDL001W	241	234	235	237	195	218	199	187	213	281	278	230	215	192	209	254	265	214	219	186	232	407	332	382	72	127	264	197	401	189	373	262	224	253	219	345	205	262	265	240	244	207	206	103	112	261	254	225
YDL002C	238	226	226	186	182	175	185	207	182	267	279	308	200	166	180	313	278	246	181	195	191	422	328	368	51	78	172	220	361	214	419	296	270	256	243	299	231	200	242	228	265	239	182	62	83	229	243	222
YDL003W	752	746	736	682	653	839	590	628	725	934	921	842	726	550	561	864	895	720	558	609	742	966	970	982	290	453	1032	476	1117	443	1181	721	618	725	756	918	624	733	672	1002	979	916	688	301	330	975	900	697
YDL004W	938	1060	948	682	629	672	530	480	586	960	901	845	541	600	530	783	815	583	520	970	1005	1287	1089	1250	344	634	898	686	2617	711	2218	1937	1543	1379	1611	1964	1345	1508	1530	734	808	801	1294	470	556	772	828	746
YDL005C	230	211	220	282	249	302	118	104	143	346	241	246	167	137	151	262	257	262	254	211	262	308	286	287	92	133	253	203	330	180	365	249	207	236	237	316	202	266	241	213	188	169	181	78	98	225	202	184
YDL006W	246	235	239	236	230	236	203	222	264	261	267	242	217	214	215	226	226	189	208	150	222	468	356	381	123	160	263	209	396	207	355	271	242	229	231	274	191	243	251	233	229	227	277	117	121	259	219	248
YDL007C-A	1	0	0	0	0	0	0	0	0	0	0	0	0	0	0	0	0	0	0	0	0	8	5	4	0	0	1	1	0	0	0	0	0	0	0	0	0	0	1	0	0	0	0	0	0	0	0	0
YDL007W	1172	1140	1159	1641	1462	1541	854	918	1116	1365	1236	1048	1061	1063	1107	1067	1119	890	1331	990	1193	2044	1804	1935	492	741	1390	939	1712	969	1627	1199	1046	951	954	1402	804	1069	1097	1118	1236	1066	1017	425	544	1269	1170	1043
YDL008W	114	103	100	158	106	143	83	74	85	172	180	144	68	71	81	125	126	117	106	98	83	212	169	176	27	38	69	60	126	54	145	119	94	83	91	97	78	68	89	119	115	113	167	54	50	105	108	109
YDL009C	3	2	3	4	2	1	3	3	7	2	4	1	2	2	3	3	1	1	2	3	1	7	1	5	2	2	4	1	7	2	4	2	3	4	2	4	3	0	5	1	3	1	5	0	1	5	1	6
YDL010W	120	122	117	175	163	191	85	109	138	121	124	75	104	108	99	106	86	88	137	94	112	186	164	141	27	75	103	76	196	82	156	138	109	125	123	165	85	131	129	137	138	119	141	52	63	132	135	136
YDL011C	0	0	0	0	0	0	0	0	0	0	0	0	0	1	0	0	0	0	0	2	2	0	0	0	0	0	0	0	0	0	0	0	0	0	0	0	0	0	0	0	0	1	1	0	0	0	0	1
YDL012C	162	155	157	214	221	242	131	121	171	205	213	140	126	122	122	187	145	122	172	116	138	223	176	217	47	66	144	111	251	125	252	182	166	160	177	244	141	180	185	158	152	123	136	47	57	160	160	152
YDL013W	237	216	218	304	288	264	163	169	211	266	212	214	197	163	217	251	259	198	222	177	206	287	291	287	103	140	274	186	321	196	393	217	185	240	241	271	185	222	214	263	207	214	214	77	106	278	253	216
YDL014W	4427	4050	4235	4255	3587	3617	3503	3699	4957	5745	4164	4909	3291	4004	3875	6049	6222	5275	2552	3930	3673	3772	4099	4685	1746	1891	3473	4870	5236	5327	8845	5530	4215	4377	4505	4756	3696	4002	3840	3902	4067	4843	4261	1252	1413	5542	4569	4670
YDL015C	1967	1896	1958	1942	1706	2021	1555	1554	1859	2387	2447	2339	1643	1537	1577	1973	1977	1835	1625	1479	1512	3382	2871	3086	957	1275	1956	1910	3222	1653	2683	2238	2148	1916	1763	2530	1824	1793	2099	1892	2035	2013	2003	767	905	1813	1780	1838
YDL016C	268	258	264	285	245	285	267	273	328	347	331	323	174	209	204	289	268	242	260	236	223	376	270	348	146	227	308	204	349	214	339	268	250	202	210	245	216	196	213	320	342	336	255	135	131	338	304	310
YDL017W	130	117	118	166	133	112	92	111	131	139	86	93	115	101	109	131	130	122	87	119	130	218	221	207	52	63	131	94	151	94	237	100	96	123	124	132	81	99	97	131	131	124	123	44	48	159	149	139
YDL018C	226	230	221	249	234	243	161	185	238	254	249	268	224	188	185	210	251	158	291	181	218	352	301	338	82	115	171	175	411	129	287	276	253	208	216	284	230	236	226	260	317	285	147	44	60	258	251	256
YDL019C	1111	1042	1056	1259	1183	1403	715	814	980	1293	1164	1115	818	748	838	949	1062	967	1340	908	1094	1771	1789	1691	370	563	1158	820	1552	693	1617	1195	900	1018	975	1295	879	1021	1029	1164	1107	1091	1343	459	597	1308	1093	985
YDL020C	558	545	554	661	665	726	365	411	483	487	476	427	439	516	715	424	523	396	655	456	642	1564	1141	1185	260	500	689	390	857	466	732	448	399	408	432	554	401	478	417	503	509	490	487	211	240	595	548	478
YDL021W	18	16	15	31	36	26	8	24	16	12	22	20	17	34	12	16	14	11	30	9	11	56	37	64	2	1	3	9	12	8	11	6	16	15	13	10	12	11	6	15	8	7	32	7	4	8	5	15
YDL022C-A	0	0	0	0	0	0	0	0	0	0	0	0	0	0	0	0	0	0	0	0	0	0	0	0	0	0	0	0	0	0	0	0	0	0	0	0	0	0	0	0	0	0	0	0	0	0	0	0
YDL022W	1305	1283	1312	1516	1419	1475	908	1021	1292	802	805	755	917	1325	992	606	604	426	2063	1815	2043	2034	2044	2128	673	787	1877	537	2690	586	2057	1517	1656	1149	923	1419	1114	1092	1216	1233	1219	1286	2365	730	746	1605	1251	1784
YDL023C	1	1	1	0	2	0	1	2	0	0	1	1	0	1	1	1	2	3	0	0	0	5	2	1	1	0	0	0	1	0	0	1	1	0	0	0	0	0	1	0	0	0	0	0	0	1	1	0
YDL024C	4	3	4	9	5	8	0	2	1	7	7	8	6	3	5	4	5	5	7	6	4	12	8	13	1	1	1	0	0	0	4	1	2	0	2	1	0	1	1	0	1	1	2	1	3	1	1	5
YDL025C	211	193	200	295	268	290	159	154	189	195	187	186	195	158	150	144	141	151	210	139	173	372	368	393	90	104	242	116	329	133	356	213	206	204	187	261	168	183	196	189	195	171	263	110	103	215	157	158
YDL025W-A	1	1	1	0	1	1	2	1	2	0	1	5	2	3	1	0	1	0	2	2	0	1	3	1	0	1	0	1	1	1	4	1	3	1	2	1	1	2	0	3	1	1	1	1	1	0	0	1
YDL026W	1	1	1	2	0	0	1	0	0	1	0	1	2	0	0	2	0	0	5	4	6	3	1	3	0	0	3	2	0	0	2	1	2	0	1	1	0	2	0	0	2	1	0	1	0	1	0	0
YDL027C	171	167	170	250	228	265	122	153	175	185	168	160	118	138	153	124	121	96	167	129	147	418	330	370	67	101	173	89	292	88	222	186	163	146	129	200	131	143	142	140	148	134	245	94	106	138	147	181
YDL028C	444	409	391	524	418	371	369	332	379	474	463	431	418	351	404	537	566	427	388	376	383	663	655	625	139	246	461	304	535	326	738	376	324	429	414	509	388	446	375	410	363	361	369	155	170	503	436	319
YDL029W	1050	1012	979	1484	1429	1343	770	742	956	1261	1193	1038	904	890	849	1072	1042	782	1304	826	1000	1407	1410	1388	380	564	1014	764	1754	798	1618	1139	1078	929	953	1306	933	960	966	909	890	831	935	369	442	1085	1019	890
YDL030W	232	222	215	211	197	226	152	163	174	269	247	186	219	168	161	270	263	234	256	223	266	360	335	367	85	127	202	187	364	212	457	273	185	248	288	364	233	231	241	147	188	148	194	83	77	196	186	188
YDL031W	2582	2396	2542	2108	1702	1990	1981	2086	2129	2917	2582	2252	2237	1949	2330	2600	2812	3093	2166	2633	2477	4114	4000	4193	1094	1505	2792	2332	3234	2289	3927	2473	1993	3142	2597	3664	2555	2535	2672	2691	2407	2484	1914	832	886	2955	2587	2881
YDL032W	1	0	0	0	1	0	0	0	0	0	1	0	0	0	1	1	0	0	1	0	1	1	0	2	0	0	0	0	0	1	0	0	0	2	2	0	0	0	0	1	0	0	2	0	0	0	0	0
YDL033C	227	199	190	194	178	152	154	134	183	281	246	200	153	133	138	285	292	227	339	229	254	276	273	260	73	128	163	187	264	179	407	229	185	204	175	251	196	207	166	208	232	214	158	62	80	293	209	201
YDL034W	0	0	0	0	0	2	0	1	1	1	0	0	0	1	0	1	0	0	0	0	0	2	0	0	0	1	0	0	0	0	0	0	0	0	0	0	0	0	0	0	0	1	0	0	0	0	0	0
YDL035C	600	545	548	726	602	638	514	535	599	798	760	681	554	552	602	651	683	630	612	377	507	932	837	911	182	249	432	426	744	409	749	543	397	521	392	545	393	475	432	623	600	627	621	223	226	696	609	578
YDL036C	377	347	347	333	304	311	305	284	321	516	443	397	357	291	341	457	432	381	334	342	377	477	442	415	96	157	286	230	466	280	575	378	273	379	359	469	321	358	351	441	383	413	348	147	158	485	422	425
YDL037C	1226	978	1113	403	287	335	250	290	230	1638	1381	1484	171	208	243	1270	1125	1163	1562	1659	1466	127	198	333	382	327	723	2821	1857	2245	2330	2110	2071	3056	2258	2559	2647	1993	1899	373	382	584	956	292	351	397	310	1005
YDL039C	1816	1035	1557	374	295	290	183	273	176	2202	1880	1966	126	157	134	1712	1414	1781	1958	2134	1669	139	190	346	401	340	693	7840	1412	6154	2207	2089	3266	4415	2498	2527	4027	2082	1893	309	268	545	1007	304	267	346	194	1655
YDL040C	2253	2058	2096	2952	2630	2618	1719	1887	2357	2373	2094	2044	2092	1849	2257	2417	2460	2216	1886	2043	2318	2482	2536	2444	599	753	1796	1690	2792	1736	4170	2125	1538	2348	2189	2954	1947	2189	1941	2312	2174	2203	1933	701	769	2870	2450	2242
YDL041W	0	1	1	2	0	0	0	0	5	0	1	0	0	0	1	1	1	0	0	0	1	1	2	4	0	0	2	0	2	1	0	2	1	0	0	0	0	1	1	0	0	0	1	0	1	0	0	2
YDL042C	323	299	297	365	307	371	219	259	295	518	399	430	345	296	336	430	418	391	391	424	452	352	522	348	89	114	329	307	364	324	511	253	150	244	271	300	261	321	226	243	236	212	323	93	108	252	206	176
YDL043C	197	202	196	174	145	191	149	167	157	246	195	186	223	239	265	187	197	142	220	200	197	330	320	326	80	108	197	179	356	177	280	257	187	164	204	265	199	194	215	165	204	164	191	64	88	175	176	179
YDL044C	201	193	191	143	129	161	113	130	163	218	213	184	110	136	149	201	172	154	314	187	223	298	241	318	89	121	206	145	366	154	317	246	191	174	191	278	179	212	182	237	243	217	239	102	98	245	210	192
YDL045C	164	145	154	209	185	242	128	120	138	191	168	164	147	159	165	178	147	121	176	123	161	314	242	258	50	73	158	96	228	90	248	139	117	139	128	190	128	141	150	147	144	154	128	48	61	174	133	140
YDL045W-A	238	214	217	172	172	164	192	164	196	269	226	211	217	217	229	191	176	125	373	178	233	261	226	261	95	120	238	113	335	103	322	227	236	240	201	289	196	192	194	362	346	339	269	104	101	300	333	339
YDL046W	852	818	827	812	765	901	556	597	626	1012	919	864	510	511	599	734	761	677	1075	740	787	1983	1731	1769	331	609	776	680	1357	631	1200	1040	922	864	788	1099	807	742	913	677	694	725	824	349	465	721	670	657
YDL047W	582	511	518	624	587	540	466	426	594	662	519	514	568	475	546	682	677	623	509	419	471	697	689	703	185	260	474	422	717	505	1111	601	481	587	537	662	487	559	480	518	447	481	535	213	176	670	542	518
YDL048C	242	210	257	410	393	592	90	130	120	348	315	337	143	200	105	259	199	329	77	84	78	267	297	389	30	32	67	115	358	125	524	242	368	341	251	343	292	248	267	218	193	209	251	61	55	259	146	469
YDL049C	32	29	31	36	40	29	29	39	28	44	37	34	36	33	18	60	30	40	22	15	18	28	29	25	10	16	29	15	30	10	31	15	42	19	22	23	23	14	25	50	50	50	15	5	1	55	59	92
YDL050C	1	1	1	1	1	0	0	1	1	2	1	1	1	1	1	2	1	0	0	1	0	1	2	1	0	0	1	2	1	1	0	0	0	1	2	0	0	1	0	0	1	1	0	0	1	0	2	1
YDL051W	1769	1719	1778	1423	1190	1371	1649	1556	1886	1764	1624	1448	1636	1711	1668	1593	1523	1467	1171	1656	1583	2591	2308	2820	643	888	1429	2096	2801	2238	2785	2213	1748	2151	2168	2630	1970	1899	2033	1781	1742	1815	1394	630	594	1894	1877	1941
YDL052C	636	586	594	645	629	659	658	548	711	831	710	642	533	580	612	697	663	611	696	440	458	766	725	737	216	244	446	518	834	532	876	685	725	546	581	721	470	563	619	612	648	540	746	285	270	729	657	629
YDL053C	296	257	287	362	320	308	272	241	351	292	243	292	286	255	318	326	307	264	258	236	270	397	395	505	97	118	253	190	327	245	557	238	239	275	282	336	242	266	237	302	247	269	249	85	116	338	299	307
YDL054C	199	197	203	256	226	255	190	233	218	203	235	232	221	223	258	172	170	153	153	146	179	465	423	440	71	119	196	133	233	121	243	191	149	149	141	190	144	142	176	188	201	196	216	98	98	182	167	191
YDL055C	13580	13138	13174	18466	16339	18458	12716	11576	14703	12935	13797	12024	12728	10923	11147	11126	11124	10217	10976	9254	10560	13986	12940	13800	5723	7150	14118	12907	24643	12180	22169	17504	16120	15205	15232	18992	14806	15180	14923	13884	13392	12929	12218	5270	5600	13859	12748	11836
YDL056W	531	481	508	596	514	544	361	403	518	594	500	452	422	364	459	573	618	568	547	446	515	879	821	880	202	284	636	430	720	408	874	442	401	533	512	669	491	518	486	444	448	467	447	159	247	571	469	367
YDL057W	50	44	46	61	56	56	35	42	52	72	51	58	42	44	45	72	48	59	39	42	54	91	90	103	9	24	32	34	59	32	76	32	26	54	42	46	24	35	33	46	37	31	51	19	23	45	45	46
YDL058W	1362	1238	1287	2388	2019	2283	982	1103	1239	1521	1277	1210	1234	1047	1341	1355	1457	1450	1228	941	1184	1992	1967	2000	391	625	1242	1033	1500	926	1956	1236	834	1279	1113	1534	1041	1283	1152	1422	1280	1250	1077	439	487	1528	1290	1168
YDL059C	25	22	26	44	32	53	29	26	37	20	13	15	26	31	23	20	17	19	16	10	21	43	34	35	6	9	29	20	38	20	28	29	22	18	16	28	19	19	27	31	22	29	26	14	9	28	25	30
YDL060W	2008	1836	1901	1840	1478	1487	1717	1666	1975	2110	1934	1573	1986	1612	1863	2048	2142	2182	1458	1790	1761	2931	3029	3252	735	1043	1908	1838	2535	1842	3363	1795	1494	2393	2093	2613	1885	2019	2023	1950	1774	1857	1645	629	653	2217	2006	2038
YDL061C	2714	2665	2754	2498	2306	2680	2393	2330	3168	3209	2426	2625	2710	3149	2457	2717	2495	1950	1740	2335	2466	2385	1955	2713	920	921	2494	2292	3986	2635	4168	3985	3602	3010	3439	4080	3141	2951	3286	2899	3269	3064	3376	917	860	3245	3515	3233
YDL062W	0	0	0	0	0	1	0	0	0	1	0	1	0	0	2	0	0	0	0	1	0	1	2	0	0	0	0	0	0	0	0	1	0	0	0	0	0	0	0	0	1	1	2	1	0	0	0	0
YDL063C	2038	1876	1964	1460	1149	1285	1839	1755	2069	2073	2016	1778	1861	1718	1906	1912	1831	1923	1752	1796	1813	3137	2792	3019	925	1206	1977	2125	2840	1895	2935	2094	1713	2237	2030	2744	1959	2038	2005	2227	2040	2232	1905	854	930	2225	1975	2173
YDL064W	414	353	361	537	532	428	359	319	417	372	335	313	381	352	400	516	454	380	288	284	341	581	494	480	107	149	292	324	470	371	822	349	343	351	360	454	323	352	373	338	327	322	421	138	160	492	374	348
YDL065C	194	199	189	235	224	284	134	146	183	241	204	179	159	156	152	190	172	154	221	155	163	282	283	254	70	107	153	156	357	142	284	258	205	177	193	291	187	219	216	200	210	197	176	56	60	204	239	204
YDL066W	2420	2337	2292	3414	2961	3305	1845	1769	2270	1990	1642	1498	1918	1851	2107	1667	1650	1397	1630	2080	2345	4194	3892	3860	686	1437	1995	1668	3726	1782	4087	2747	2228	2434	2781	2968	2295	2405	2355	2355	2202	2222	3451	1474	1788	2664	2434	2260
YDL067C	451	483	422	289	257	318	278	265	367	516	452	458	295	331	300	383	426	307	184	410	471	498	431	494	154	254	389	277	1045	286	1038	876	623	668	702	718	589	669	586	414	435	437	694	243	246	483	446	336
YDL068W	2	2	2	0	2	2	0	0	0	2	2	3	0	3	4	1	2	3	3	1	2	2	5	3	1	3	4	4	2	2	1	3	4	1	2	0	1	2	4	2	1	3	1	1	0	4	1	2
YDL069C	83	82	76	41	64	66	67	64	71	116	90	89	76	61	60	107	76	65	59	63	68	131	132	118	39	50	83	73	134	52	140	128	108	79	91	112	65	95	83	61	56	73	113	44	35	74	77	52
YDL070W	1229	1116	1082	1644	1567	1407	981	916	1047	1873	1557	1507	996	908	1050	1977	1975	1675	1065	818	1024	1396	1411	1477	313	552	1012	602	1471	710	2115	966	716	1255	1237	1363	887	1091	1001	905	790	875	1207	553	515	1220	934	854
YDL071C	5	4	5	6	3	2	5	1	10	8	2	10	3	6	2	7	2	4	7	6	5	4	8	7	3	1	6	0	4	1	6	10	4	4	2	4	4	7	5	3	5	2	5	2	3	6	6	6
YDL072C	446	447	461	704	678	752	360	346	493	420	368	403	375	486	378	306	303	241	448	282	336	721	712	846	183	304	455	224	805	235	592	480	502	368	424	488	377	399	442	484	453	507	629	183	265	502	476	568
YDL073W	614	585	590	584	567	553	436	427	535	815	678	665	493	472	552	684	743	650	595	539	571	871	749	870	282	399	751	557	950	548	929	654	535	621	606	791	570	654	617	537	542	479	623	250	273	612	549	453
YDL074C	1410	1286	1317	1403	1244	1331	1122	1100	1246	1595	1531	1272	1233	1122	1249	1588	1496	1422	1217	1135	1327	1982	1782	1937	497	643	1424	1307	1890	1199	2218	1403	1108	1576	1363	1851	1273	1449	1366	1355	1243	1321	1252	489	529	1535	1406	1177
YDL075W	14498	14038	14659	11538	11148	12721	12947	12036	14485	15431	14232	14158	13490	13782	12564	13111	12294	10798	10577	12138	12397	19720	14308	18902	5710	7950	12369	15149	22906	14598	22641	20819	19330	15735	15964	22745	15702	15029	17920	13100	16092	15331	17143	6006	6640	15475	15870	14928
YDL076C	219	204	205	235	228	256	183	173	233	316	295	269	224	232	174	244	268	214	233	187	191	385	314	349	70	99	165	129	265	122	226	161	175	160	130	221	151	148	154	248	232	208	271	109	141	210	218	204
YDL077C	470	437	445	604	538	569	365	394	482	462	458	393	462	419	479	457	484	412	412	370	469	826	762	768	137	222	466	357	591	359	705	416	317	422	341	551	330	434	334	496	457	458	432	166	184	583	508	438
YDL078C	805	782	761	894	829	910	618	546	709	923	907	835	527	637	588	786	776	658	919	695	809	1207	1110	1167	226	394	537	583	1274	554	1401	1016	924	771	772	908	797	756	821	751	816	767	819	355	427	851	854	808
YDL079C	28	25	27	25	17	24	17	18	29	33	30	24	24	13	21	35	27	25	34	30	35	61	59	52	11	21	34	13	38	12	48	20	26	28	25	33	11	32	26	11	8	15	57	20	25	9	11	18
YDL080C	257	245	245	305	250	281	236	255	259	287	265	282	264	253	229	274	311	258	187	248	249	457	446	444	67	135	240	159	309	198	363	187	186	234	197	263	198	196	190	251	242	218	270	112	110	299	267	273
YDL081C	9357	8934	9499	8025	7993	8223	8096	6555	9887	11881	8596	11295	8364	10542	7929	10399	9556	8124	5585	6752	7277	6971	6854	9526	4246	3882	7620	8838	12846	13106	20278	16481	12694	8925	11515	11867	8416	9667	10427	8461	8339	9725	10235	3887	3404	11632	10552	11382
YDL082W	8572	8425	8519	7793	7036	7935	7409	6926	8452	9460	8880	8719	7309	8142	7078	8386	8439	7348	6483	7922	7864	9630	8531	9847	3159	4121	7932	9014	14434	10236	15624	10975	10214	9520	10626	12428	9622	9364	9682	8566	8451	8584	7980	3153	3213	8632	9372	8252
YDL083C	13252	12767	13099	10555	9441	11121	12359	11330	14063	13930	13961	13191	12054	12882	12965	11379	11070	10214	9685	11421	11860	16772	12932	15038	4786	6593	11540	15054	21462	13590	21103	17958	16421	15125	15019	18689	14613	14074	14751	13527	14014	14366	13825	5243	5494	14018	14111	13182
YDL084W	7467	7135	7167	9062	8139	8937	5880	5728	6849	8515	8589	7543	6164	5914	6598	7173	7594	6659	6828	6302	6713	10141	8775	9196	2835	4106	7278	6664	11634	6089	11664	8694	7580	8181	7306	9780	7218	7550	7680	7126	6823	7034	7209	2941	3395	7347	6928	6172
YDL085C-A	184	165	180	202	160	187	120	100	158	232	199	216	117	127	87	213	190	152	235	156	182	246	187	237	95	127	225	180	309	149	273	254	258	212	200	273	198	161	232	108	112	117	219	70	100	104	120	131
YDL085W	3	4	4	7	3	7	2	6	4	1	2	1	2	5	4	5	7	1	9	4	5	7	11	6	0	5	5	1	3	4	2	5	1	2	2	1	0	0	2	2	4	3	4	2	7	0	6	7
YDL086C-A	17	14	16	21	21	22	25	27	21	24	8	11	17	15	21	13	8	19	8	6	3	18	17	22	6	5	14	13	13	16	33	20	17	10	18	13	12	8	16	13	19	18	24	7	11	14	13	13
YDL086W	719	703	723	409	396	491	501	488	644	1009	761	865	466	536	531	816	828	723	670	533	531	1377	1610	1558	208	357	489	645	1081	840	1268	816	758	655	767	895	681	722	737	657	653	758	555	195	226	871	795	792
YDL087C	81	70	80	110	94	82	73	56	77	88	68	84	55	54	77	124	107	110	62	66	78	86	98	104	31	41	94	42	78	96	149	65	43	65	63	82	51	76	62	91	65	83	73	40	32	114	77	91
YDL088C	741	675	689	624	526	594	615	616	730	796	710	638	640	566	680	730	794	666	616	581	651	1166	1062	1063	278	369	787	599	1069	688	1240	721	549	798	723	953	677	748	680	799	703	715	602	247	254	932	693	680
YDL089W	178	170	164	217	188	209	58	100	72	176	172	158	227	207	188	146	145	126	162	123	156	368	294	314	64	116	187	132	257	115	239	171	153	147	144	194	135	135	131	218	194	163	185	79	81	201	224	208
YDL090C	165	159	155	206	152	160	92	94	115	192	178	161	129	173	123	193	148	139	189	144	165	320	297	300	63	141	182	111	257	117	261	163	144	128	141	178	103	124	144	152	148	140	146	67	99	186	161	152
YDL091C	157	154	145	185	178	195	108	128	134	206	194	148	118	119	127	170	155	135	190	105	136	318	278	273	24	66	88	93	258	77	184	162	156	132	129	174	99	148	142	180	159	161	184	65	83	162	161	145
YDL092W	564	532	549	435	434	462	482	456	574	716	670	573	488	565	477	576	535	500	467	409	403	937	729	853	236	270	483	527	851	484	784	626	652	517	536	733	466	490	598	573	654	575	603	182	256	650	566	611
YDL093W	372	362	367	543	438	528	267	286	374	590	516	436	338	344	315	383	430	422	353	347	401	452	469	451	171	246	439	304	506	264	471	380	322	308	298	374	270	315	328	343	385	340	435	154	197	355	318	315
YDL094C	2	3	2	1	4	3	0	1	1	3	3	1	1	1	0	3	2	2	0	5	1	10	9	10	0	0	3	1	3	1	4	1	2	1	0	1	2	1	1	2	3	3	1	0	0	6	6	3
YDL095W	4298	4075	4192	4690	4408	4593	3662	3628	4647	5336	4883	4928	3577	3359	3882	4072	4217	4132	3807	3055	3549	5377	5460	5377	1521	2257	3872	4438	6502	4141	7331	5469	4416	4688	4305	5570	3942	4617	4591	3648	3953	3953	4510	1669	1969	3870	3348	3261
YDL096C	1	1	1	0	0	0	0	0	0	3	2	1	0	0	0	0	0	1	1	0	0	0	2	5	1	1	1	0	0	0	2	2	2	2	0	1	1	2	0	0	2	0	2	0	0	2	2	0
YDL097C	1209	1127	1182	1669	1445	1448	1025	978	1345	1183	1054	954	1275	1161	1441	1159	1173	875	1110	1017	1254	1975	2092	2080	416	741	1480	849	1454	1023	1999	1118	877	1031	1080	1493	851	1064	1048	1088	953	935	1087	410	509	1411	1158	973
YDL098C	99	96	87	80	93	91	62	55	77	136	147	104	89	81	81	139	108	84	94	79	75	166	138	143	28	31	69	77	196	63	136	118	110	91	78	132	95	89	90	68	97	63	166	58	50	61	69	72
YDL099W	273	264	262	297	326	295	215	242	310	310	286	229	218	241	262	313	277	280	279	239	266	378	298	356	83	113	252	237	401	187	402	317	239	314	265	420	231	343	272	299	238	238	225	91	78	301	288	240
YDL100C	2649	2545	2578	3016	2757	2904	2167	2043	2522	2579	2724	2389	2256	2200	2358	2226	2172	1915	3036	2628	2910	4216	3789	4044	965	1519	2538	2633	4110	2539	4116	3131	2636	2511	2672	3356	2364	2622	2677	2419	2433	2239	2724	1065	1264	2504	2306	2378
YDL101C	324	320	302	251	239	250	242	289	301	348	344	291	340	250	249	308	314	209	413	369	440	501	475	457	101	170	380	257	469	242	493	339	251	313	323	401	285	337	322	353	378	318	311	151	138	351	357	279
YDL102W	685	658	660	849	754	794	545	570	655	687	614	534	621	540	630	639	716	656	551	564	718	1126	1232	1089	248	403	805	514	842	511	1116	656	513	708	689	882	541	683	588	743	691	632	609	210	294	773	711	601
YDL103C	669	632	627	813	719	743	508	487	644	727	646	620	665	540	642	738	740	615	565	581	703	831	882	814	242	384	597	576	1008	592	1354	809	547	746	748	990	682	739	705	530	478	418	473	224	247	592	493	526
YDL104C	69	64	64	57	66	63	29	47	36	65	50	43	50	47	49	42	47	26	89	47	77	144	89	131	23	35	63	36	108	31	88	77	80	53	60	72	61	72	63	102	105	97	87	33	40	104	79	94
YDL105W	107	102	99	139	97	102	79	95	117	109	119	96	107	112	118	90	93	92	116	89	103	184	174	146	23	49	92	58	134	72	159	105	89	94	85	132	80	82	82	132	105	106	110	49	52	125	139	81
YDL106C	221	198	215	278	262	281	189	171	203	199	166	154	173	171	221	182	201	174	233	159	218	337	307	349	82	112	294	183	285	189	383	219	195	225	218	295	207	203	200	194	212	173	186	79	80	269	210	196
YDL107W	101	97	92	82	69	69	73	85	83	112	105	114	78	93	69	76	87	85	157	77	88	125	114	134	32	64	87	67	184	49	151	93	91	115	85	118	83	102	109	113	129	111	127	42	54	121	133	117
YDL108W	183	168	172	183	180	142	157	167	185	199	172	178	181	173	169	189	199	172	131	147	146	267	253	255	72	95	188	131	220	141	335	164	159	165	182	239	142	161	172	177	162	173	165	87	82	249	156	182
YDL109C	96	88	91	152	129	100	64	73	98	134	110	96	65	69	102	127	135	117	84	74	85	125	139	162	28	55	100	77	107	88	151	78	54	82	67	90	54	76	76	95	90	71	78	33	38	128	85	84
YDL110C	95	85	88	94	83	82	66	76	76	164	118	127	67	51	78	139	116	114	120	68	96	159	184	199	13	26	55	38	135	64	158	88	90	94	90	98	59	55	63	63	62	65	106	36	37	88	82	77
YDL111C	718	642	679	684	533	520	611	581	718	722	570	558	624	549	596	677	625	605	656	768	789	1024	943	1023	299	441	728	676	1006	736	1431	771	684	728	690	929	618	648	680	663	662	706	600	234	273	754	608	635
YDL112W	2227	2034	2164	2342	1920	2135	1798	1860	2147	2432	1986	1854	1996	1865	2244	2175	2240	2481	1875	2069	2039	3216	3215	3351	950	1299	2483	2135	2660	1982	3486	2217	1654	2328	2094	2916	1988	2152	2091	2219	1976	2107	2013	850	851	2451	2108	2127
YDL113C	168	164	159	293	301	263	103	124	169	152	153	133	127	120	154	172	175	133	164	131	175	260	282	226	61	110	195	106	261	122	328	150	142	164	151	221	122	136	149	152	138	125	132	47	53	178	175	121
YDL114W	1	1	1	1	0	0	0	0	0	2	1	1	1	1	0	1	1	0	0	2	2	6	4	2	2	2	4	0	0	1	3	2	1	0	0	0	0	0	1	0	0	0	0	0	0	0	0	1
YDL114W-A	3	3	3	1	0	3	1	4	2	5	0	3	2	2	5	3	3	1	1	4	0	12	19	17	1	3	6	1	6	0	3	2	1	2	2	2	3	2	3	1	3	2	2	1	2	1	1	1
YDL115C	132	133	133	143	144	168	123	97	121	161	174	128	115	127	95	145	171	121	139	112	130	194	141	179	57	98	173	85	193	98	179	124	140	112	106	138	113	129	146	152	168	132	108	51	61	155	162	171
YDL116W	986	945	963	1096	961	1105	841	871	974	1091	1000	857	789	772	886	892	965	930	888	851	897	1555	1384	1478	431	606	1099	852	1494	827	1511	998	843	986	932	1309	882	994	930	945	974	968	971	363	435	1063	1004	905
YDL117W	988	929	958	1019	827	978	690	779	867	1118	1046	894	898	865	983	978	1018	958	897	817	996	1462	1470	1441	420	640	1179	895	1391	870	1551	820	699	974	845	1277	817	878	956	1116	1112	1065	695	277	331	1283	1154	882
YDL118W	0	0	0	0	1	0	0	0	1	0	0	1	0	0	0	0	0	0	1	1	0	1	1	0	0	0	1	0	0	0	1	0	0	0	1	0	0	0	0	0	0	0	0	0	0	0	1	1
YDL119C	39	33	34	81	43	55	20	33	26	55	36	23	20	40	33	40	30	33	50	29	44	50	57	46	22	32	62	19	35	17	47	28	33	30	29	40	36	28	27	31	27	19	35	16	11	43	33	37
YDL120W	296	267	267	365	324	366	244	176	235	239	244	217	221	221	222	271	222	186	250	214	263	425	385	376	64	100	190	204	453	252	543	333	286	301	317	401	264	294	300	320	263	237	360	140	144	372	320	331
YDL121C	425	406	416	432	409	419	289	314	387	466	383	427	381	382	360	379	404	319	343	318	347	721	497	682	107	193	326	373	685	386	611	532	539	464	474	548	418	391	464	409	491	429	563	173	211	417	447	392
YDL122W	2099	1919	1978	1838	1535	1619	1682	1755	1987	2351	2283	1974	1723	1546	1860	2231	2220	2214	2150	1947	2108	2858	2608	2871	800	1032	2103	1867	2726	1686	3507	2180	1714	2273	2040	2693	1806	1960	1945	2104	2102	1995	1897	720	855	2403	2136	2053
YDL123W	76	75	79	66	65	75	51	56	78	106	72	81	53	66	55	77	83	56	67	63	83	121	116	151	32	40	88	65	114	65	137	92	63	50	64	93	80	78	89	69	86	100	65	23	25	104	110	78
YDL124W	151	138	133	929	912	889	59	65	70	94	72	68	77	109	79	78	57	56	141	49	52	170	165	178	20	58	70	21	154	29	168	81	73	53	59	78	53	50	57	121	94	94	162	53	66	126	93	137
YDL125C	693	677	701	822	834	1068	685	698	883	734	684	697	716	794	697	522	514	462	614	504	511	946	815	918	163	273	539	659	1084	632	1009	893	797	689	751	819	620	726	755	699	723	748	808	188	203	713	679	790
YDL126C	5813	5352	5492	10618	9600	8883	4311	4417	5855	5591	5200	4409	5674	4845	6277	5743	5646	4656	5296	4616	5676	8941	9256	8979	2113	3679	5825	4365	6416	4388	9516	4958	3815	4331	4446	5986	3491	4573	4535	5295	5146	5005	5041	2073	2916	6874	5408	5178
YDL127W	166	148	153	197	156	146	118	147	180	189	152	153	198	154	167	204	165	153	102	136	148	263	261	279	55	67	148	169	180	165	255	133	136	160	149	192	125	158	138	147	172	117	97	44	39	205	150	134
YDL128W	800	787	810	787	703	837	574	650	749	722	755	741	535	582	607	624	652	566	889	682	736	1084	1020	1152	424	592	905	687	1335	626	1122	1015	914	859	801	1043	865	784	784	980	930	1075	859	335	414	992	972	1006
YDL129W	155	137	138	139	107	94	130	130	125	169	138	141	145	144	139	193	179	182	136	157	155	182	194	222	31	41	75	134	187	129	271	125	89	174	162	222	143	147	148	140	150	154	140	49	52	205	144	145
YDL130W	8920	8723	8896	7782	8062	8265	8331	7008	10044	11730	8278	11287	7850	10187	7479	9925	8826	7318	6205	6706	7355	7807	7877	9900	3146	3829	7321	7563	11533	11617	16536	14998	10817	8663	11477	9829	8012	8784	8434	8733	9118	9870	9721	3053	2671	11797	11110	11238
YDL130W-A	31	32	27	43	62	52	17	23	19	32	30	23	20	20	23	17	26	10	66	20	39	67	45	48	4	17	33	8	79	14	34	35	21	16	27	25	24	20	21	41	36	27	48	17	16	27	21	33
YDL131W	1056	926	989	1628	1410	1639	1283	938	1300	729	698	555	917	771	951	651	677	619	574	741	868	1566	1486	1524	298	453	887	922	1203	1080	1681	954	697	997	1039	1287	789	988	922	891	811	764	1841	719	904	1078	1003	836
YDL132W	1372	1240	1314	1425	1201	1357	1022	1050	1314	1457	1311	1197	1159	956	1324	1342	1375	1127	1138	1013	1259	3228	2829	2891	427	708	1502	1110	1816	1133	2053	1170	986	1258	1099	1650	1051	1201	1166	1304	1170	1181	1089	408	473	1511	1287	1154
YDL133C-A	781	805	847	854	697	729	525	436	768	1327	872	1288	676	1094	557	1010	699	680	360	656	610	875	841	1076	116	58	405	567	1241	1086	929	1343	1326	755	1228	1251	808	687	1012	765	1102	787	1251	190	143	897	936	992
YDL133W	242	230	247	275	244	291	177	187	236	266	285	244	177	201	205	275	248	226	241	203	228	357	283	372	143	170	341	210	390	219	369	257	213	248	204	333	213	234	235	209	228	232	238	81	108	227	237	218
YDL134C	861	835	843	889	748	856	723	749	872	994	992	894	711	711	809	860	896	747	815	755	805	1333	1215	1243	281	410	766	743	1443	732	1287	951	854	879	835	1159	798	809	945	827	801	779	916	411	440	859	795	737
YDL135C	439	419	429	492	445	550	367	352	424	512	472	434	394	361	331	392	412	307	447	362	370	589	482	558	121	163	338	368	744	364	677	568	503	419	422	650	385	456	472	451	498	489	533	121	170	444	429	473
YDL136W	2212	2177	2232	2062	1804	2141	1804	1658	2060	2422	2300	2244	1229	1403	1217	1932	1891	1613	1858	2083	2074	2693	2133	2618	1035	1250	2214	2550	4181	2644	4043	3619	3264	2687	2956	3617	2666	2596	2902	1786	2008	2053	2543	865	1054	1866	1906	1772
YDL137W	1193	1110	1096	1380	1233	1290	855	777	960	1586	1463	1425	822	884	777	1284	1214	988	1580	765	891	1844	1444	1630	507	744	946	728	1845	687	1565	1301	1271	908	1062	1414	1051	943	1164	1077	1281	1212	1501	585	703	1204	1104	1089
YDL138W	204	190	206	237	237	244	174	188	265	291	243	241	204	199	241	232	286	261	180	178	168	239	211	208	83	130	214	177	226	180	274	163	137	154	136	211	135	116	144	244	232	285	182	53	74	253	252	218
YDL139C	48	44	42	48	39	32	55	50	42	63	50	48	35	42	47	54	49	55	38	44	39	109	76	86	20	21	46	35	55	21	65	32	33	35	36	56	26	48	33	46	41	29	45	14	26	50	61	37
YDL140C	4743	4346	4613	6068	5565	5940	3759	3906	4728	6178	5383	5557	3982	3704	4610	4733	5106	5138	3871	3553	4244	5721	5578	5878	1757	2518	4848	4177	5226	3652	6805	4996	3612	4461	3750	4842	3931	4302	3817	5258	5283	5489	4954	1745	1994	5483	4575	4839
YDL141W	545	472	490	783	680	682	490	460	558	603	587	524	491	455	523	552	579	446	471	362	432	708	585	631	167	258	407	503	659	503	959	506	386	441	376	551	395	425	446	507	507	589	519	182	213	583	456	458
YDL142C	94	90	89	109	92	100	87	74	79	147	135	115	79	78	93	91	91	69	105	84	76	142	130	133	37	45	91	64	149	69	122	98	88	77	82	113	67	80	82	83	80	83	96	27	46	98	109	93
YDL143W	2602	2440	2548	2842	2547	2843	2233	2192	2575	3107	2490	2255	2399	2333	2542	2866	2806	2512	2238	2327	2482	3669	3702	3699	1009	1442	2815	2123	3369	2407	4239	2501	2278	2494	2629	3372	2205	2408	2572	2370	2267	2216	2256	900	1056	2976	2692	2589
YDL144C	265	241	251	333	312	350	227	219	242	368	229	266	277	262	263	333	361	249	214	202	266	370	374	380	102	168	309	138	236	176	413	228	192	150	230	251	149	184	213	262	207	233	307	115	158	337	283	218
YDL145C	6031	5573	5809	8417	7492	7938	4707	4781	5842	6925	6470	6280	4928	4600	5532	5963	6612	6209	5396	4599	5325	7966	8175	8226	2266	3424	5938	5283	7609	4837	9619	5604	4707	5576	4985	6624	4698	5061	5197	6262	6142	6299	5629	2233	2634	6823	5801	5551
YDL146W	186	183	181	172	182	224	156	196	209	229	216	199	138	155	135	188	190	148	169	131	164	332	318	348	80	98	166	147	308	121	282	235	185	157	149	221	186	177	179	168	178	167	231	66	78	155	149	166
YDL147W	1805	1716	1770	2137	1976	2184	1403	1392	1950	1866	1962	1626	1547	1416	1751	1642	1659	1380	1774	1517	1830	3447	2762	2921	612	1058	1888	1625	2833	1364	2432	1860	1561	1658	1522	2216	1476	1607	1654	1807	1826	1755	1657	647	830	1985	1709	1646
YDL148C	1511	1396	1442	1591	1329	1439	1239	1237	1387	1582	1384	1125	1374	1261	1395	1451	1451	1486	1098	1289	1178	2715	2354	2700	558	791	1428	1445	1961	1228	2262	1673	1251	1726	1460	2095	1332	1537	1610	1408	1320	1342	1383	513	575	1502	1382	1393
YDL149W	93	88	92	165	146	135	48	62	79	104	95	129	80	70	71	115	96	115	119	79	114	213	213	211	27	64	93	44	96	42	123	72	57	42	48	78	50	71	57	77	84	73	93	41	72	93	90	61
YDL150W	802	725	743	801	647	602	678	628	674	846	818	645	768	722	781	987	1002	933	506	726	759	1109	1157	1222	279	393	813	711	964	772	1490	739	494	955	683	1017	661	713	781	738	656	641	552	225	249	945	802	758
YDL151C	0	0	0	1	1	0	0	0	1	0	1	0	0	0	1	0	0	0	0	1	0	2	0	0	0	0	0	0	0	1	1	1	0	1	0	0	0	1	0	0	0	0	0	0	0	0	1	2
YDL152W	0	0	1	1	0	0	0	2	0	0	1	0	0	0	0	0	1	0	0	0	0	1	0	1	0	0	0	0	0	1	0	1	1	0	0	2	0	0	2	1	0	1	1	0	0	0	1	0
YDL153C	629	582	595	410	344	411	565	565	679	889	680	539	648	563	602	867	849	925	338	427	372	980	955	1019	211	220	459	449	612	410	793	616	455	630	542	774	469	659	562	801	721	705	537	188	203	842	787	808
YDL154W	124	119	116	144	111	141	90	91	125	156	158	145	91	72	102	156	191	159	147	101	113	213	200	225	46	78	141	86	160	79	167	117	65	117	88	96	84	128	86	126	101	115	89	57	56	153	128	87
YDL155W	418	384	381	483	397	414	352	291	376	483	463	354	360	287	330	466	471	407	316	295	334	519	530	547	143	229	379	386	576	387	771	434	351	452	458	564	387	398	399	375	380	387	305	133	151	472	422	331
YDL156W	139	118	127	184	151	149	111	110	136	147	102	135	127	87	161	150	151	144	132	102	120	212	218	185	39	71	118	99	154	95	284	104	96	99	108	146	82	126	100	123	145	150	107	38	60	183	110	111
YDL157C	277	260	261	259	220	269	284	241	311	262	255	244	266	281	228	264	215	168	313	269	246	554	402	476	89	131	224	169	385	187	355	268	252	236	271	300	235	206	231	260	327	328	347	113	157	263	323	289
YDL158C	80	73	79	73	81	100	68	47	68	76	71	91	62	71	58	91	57	51	95	85	88	188	138	192	44	44	92	36	99	40	109	91	80	48	62	63	54	53	57	85	75	102	76	33	28	98	84	81
YDL159C-B	0	0	0	0	0	0	0	0	0	0	0	0	0	0	0	0	0	0	0	0	1	0	0	0	0	0	0	0	0	0	0	0	0	0	0	0	0	0	0	0	0	0	0	0	0	0	0	0
YDL159W	208	193	190	251	208	202	145	141	187	242	197	178	141	143	182	243	194	190	191	201	208	343	374	329	108	116	225	157	265	179	327	217	154	188	190	209	158	185	188	181	200	183	184	67	69	256	197	164
YDL159W-A	0	0	0	0	0	0	0	0	0	0	0	0	0	0	0	0	0	0	0	0	0	0	0	0	0	0	0	0	0	0	0	0	0	0	0	0	1	0	0	0	0	0	0	0	0	0	0	0
YDL160C	1618	1500	1560	2340	2063	2407	1382	1290	1668	1829	1704	1631	1284	1237	1541	1617	1581	1610	1107	1306	1362	2082	2029	2084	638	838	1571	1538	2142	1358	2692	1651	1308	1675	1578	1986	1455	1571	1479	1486	1450	1560	1576	641	601	1573	1421	1230
YDL160C-A	8	10	9	7	6	12	2	6	4	14	8	13	5	14	6	6	14	5	13	7	7	15	16	21	0	6	4	11	15	10	13	9	13	5	12	12	13	11	8	6	5	12	8	3	4	9	18	4
YDL161W	417	396	406	467	383	461	305	304	372	431	382	360	377	348	330	347	313	316	368	349	376	568	513	530	189	258	483	470	735	373	618	498	455	478	401	648	361	451	457	450	414	374	385	142	151	444	447	407
YDL162C	1	0	1	0	0	4	0	2	1	1	0	1	2	0	0	0	0	0	1	1	2	0	0	0	0	0	0	1	0	0	0	1	1	0	0	2	1	0	2	2	0	2	0	0	0	1	0	0
YDL163W	0	0	0	0	0	0	0	0	0	0	0	0	0	0	1	0	0	0	0	0	0	0	0	0	0	0	0	0	0	0	0	0	0	0	0	0	0	0	0	0	0	0	0	0	0	0	0	0
YDL164C	485	449	449	604	551	570	344	360	490	522	471	474	469	365	398	499	523	437	463	417	553	707	781	673	164	252	503	345	553	363	824	430	304	402	429	507	342	465	363	499	501	488	484	154	210	607	480	397
YDL165W	334	339	334	325	320	329	317	280	297	419	431	395	290	286	252	320	326	334	300	306	273	553	493	542	119	215	297	284	578	287	511	428	408	312	372	485	340	302	351	283	307	320	352	131	172	278	317	264
YDL166C	279	270	273	262	229	257	271	304	341	303	237	244	277	336	260	211	196	163	263	251	301	449	396	404	127	177	265	209	367	201	350	319	278	255	268	329	241	253	306	269	295	311	394	123	132	309	292	303
YDL167C	960	880	903	1054	882	973	863	816	971	1207	1020	911	893	755	859	1181	1208	1146	750	768	742	1430	1415	1553	274	388	740	766	1159	843	1475	917	648	953	911	1190	756	945	908	920	812	922	833	319	347	1042	890	794
YDL168W	664	652	663	683	623	647	509	620	702	531	411	365	570	677	594	469	500	357	1236	1094	1335	1074	1079	1091	296	536	880	378	725	439	874	537	429	420	498	651	401	478	518	773	820	717	687	258	286	1062	926	938
YDL169C	3	2	2	6	6	2	0	1	1	6	4	2	1	3	1	8	4	1	5	0	2	6	9	14	0	1	3	0	0	0	3	0	0	1	1	3	1	2	0	1	0	0	5	1	1	2	0	2
YDL170W	155	139	153	193	163	166	138	128	163	199	159	166	141	133	159	175	191	174	178	172	173	286	251	281	69	120	178	94	108	106	155	107	103	87	93	121	74	81	84	162	144	155	134	58	59	237	172	205
YDL171C	10182	9415	10287	10750	9992	11885	12652	14113	16324	8605	9664	9578	14768	13737	16451	7740	8497	9215	3918	3457	3989	11559	10070	11782	1123	2104	3165	15343	13697	13950	17280	12230	10370	11874	9956	13916	9801	11505	11181	10449	10477	10333	6036	2119	2759	10835	9605	9412
YDL172C	7	5	7	6	5	3	7	2	2	4	4	5	4	3	4	5	6	9	10	12	16	26	16	23	3	6	6	4	4	4	10	8	6	5	4	9	4	1	3	7	3	10	3	3	1	7	2	6
YDL173W	378	347	341	473	467	485	327	271	333	469	391	362	345	345	342	436	393	332	304	261	317	332	390	358	120	181	362	243	567	331	684	361	292	402	372	508	352	369	372	396	322	289	350	130	133	443	386	301
YDL174C	831	760	732	621	497	593	398	381	506	1338	1118	1074	440	441	497	1165	1133	840	1778	1015	1262	1063	1191	1137	367	877	1055	421	1037	494	1318	721	450	623	691	863	571	660	660	583	575	531	966	422	452	807	645	572
YDL175C	149	143	142	182	152	135	147	145	148	150	108	133	119	122	148	148	152	145	117	125	143	279	319	233	53	82	175	100	184	109	258	123	98	150	156	170	103	142	153	130	130	127	132	58	70	165	142	150
YDL176W	158	147	155	206	207	228	143	115	150	227	193	193	119	120	124	191	229	198	173	140	154	215	231	232	70	107	142	99	167	108	255	151	138	121	121	164	110	121	126	135	115	144	129	58	67	179	127	164
YDL177C	68	67	68	71	76	75	49	73	67	76	82	92	56	60	59	73	70	67	90	54	55	155	124	132	26	40	76	48	96	54	103	79	67	59	61	82	54	51	52	36	60	55	59	17	26	58	62	59
YDL178W	913	884	857	712	581	700	762	758	825	1155	1085	979	753	723	725	923	1013	812	850	769	888	1398	1231	1301	358	582	949	619	1493	560	1427	1052	781	896	832	1110	758	814	853	972	922	941	1110	488	493	1004	914	945
YDL179W	303	285	290	326	246	289	240	284	273	331	304	272	240	281	297	284	290	216	289	188	288	558	494	585	170	244	494	214	445	166	376	210	172	202	192	282	176	207	222	467	402	365	235	101	143	443	384	288
YDL180W	249	244	238	268	231	291	169	200	205	274	274	241	187	211	214	196	231	176	201	178	239	423	367	366	94	157	195	208	384	189	406	296	217	252	251	330	184	235	270	257	272	269	302	127	144	309	252	225
YDL181W	187	210	176	114	87	108	51	58	64	194	129	170	73	82	75	127	124	102	19	207	283	231	179	220	104	126	267	63	568	74	601	488	333	327	381	331	311	336	275	115	137	150	340	112	107	139	141	79
YDL182W	1653	1468	1485	1818	1475	2023	1665	1096	1536	1264	880	761	1118	887	976	782	798	725	527	714	744	1403	1520	1721	283	369	749	1874	2317	2278	3283	2085	1342	2441	3056	3032	1737	2682	2117	1251	1155	1204	3945	1583	2156	1398	1406	918
YDL183C	56	52	51	34	45	35	36	40	46	63	38	31	35	28	41	33	47	44	141	85	96	32	42	29	26	33	70	29	88	45	70	62	43	53	54	54	40	60	54	63	64	60	115	36	57	63	56	57
YDL184C	1000	1034	1007	948	901	894	618	642	817	1530	1083	1247	900	1219	645	1243	1023	962	697	765	766	1011	882	1342	142	178	505	791	1257	1207	1809	1962	1532	1018	1460	1641	868	1148	1357	940	1366	815	1419	210	284	1070	1407	1091
YDL185C-A	1	1	1	1	1	1	2	1	0	0	0	0	2	1	2	1	1	0	0	0	0	2	2	1	0	0	0	0	0	3	0	1	0	0	0	0	0	1	0	1	0	2	1	0	0	0	0	0
YDL185W	11508	10957	11514	18512	16108	17318	12241	12315	14546	10687	10081	9841	8019	8184	8458	8424	8490	8333	11033	9800	10525	16795	16314	18319	4960	6883	11079	9085	13484	8877	13662	11594	10245	9086	8581	11377	8035	9196	9573	15118	15365	15164	11777	4403	5061	15185	13550	13994
YDL186W	1	1	1	2	2	1	1	0	3	2	2	2	1	0	0	1	2	1	1	2	0	3	0	4	0	3	2	1	1	0	1	1	0	0	1	2	1	2	1	0	0	0	3	0	0	0	0	0
YDL187C	17	15	18	11	12	11	17	18	15	23	13	22	15	19	14	14	22	12	22	6	7	32	32	43	7	9	18	16	16	17	25	19	22	11	16	20	18	10	13	11	14	20	16	8	11	22	18	25
YDL188C	609	553	573	687	594	633	441	479	545	701	671	617	533	459	541	610	659	567	716	466	572	773	716	776	221	290	544	517	836	477	874	616	544	532	495	758	516	540	547	604	628	599	771	252	333	638	588	545
YDL189W	389	323	338	596	497	452	245	259	382	400	363	363	404	388	415	552	523	411	341	286	270	388	392	427	131	160	346	237	389	280	783	287	259	325	268	390	280	264	296	324	325	342	349	114	153	474	332	291
YDL190C	1058	1010	1035	1362	1243	1341	810	861	986	1155	1115	1012	884	794	993	961	1091	916	1068	886	977	1708	1529	1599	395	663	1142	901	1435	801	1524	1010	922	1032	912	1264	855	1064	968	1032	1075	1082	1062	446	503	1126	1023	1013
YDL191W	5136	5137	5183	4276	3616	4359	4548	4152	5467	5426	5530	5331	4325	5113	4335	4227	4453	3583	3823	4243	4344	6024	4838	5966	2017	2343	4521	5552	9086	6122	9570	7965	7079	5779	6838	7802	5855	5878	6326	5186	5708	5605	5489	1881	2195	4949	5409	4715
YDL192W	4346	4261	4210	3735	3544	3604	3708	3570	4293	5031	5036	5077	3623	4175	3405	4452	4150	3486	3875	3344	3339	5048	4131	4672	1243	1647	2860	4396	7658	4532	7212	5914	5704	4559	5130	6191	4635	4221	4932	4096	4850	4589	4966	1670	1832	4608	4871	4627
YDL193W	307	304	303	448	406	425	239	239	284	281	291	264	262	272	258	301	281	238	293	267	281	462	469	457	116	175	394	259	481	282	534	356	286	273	307	392	301	337	288	274	281	304	274	105	128	282	296	264
YDL194W	110	102	114	137	117	141	101	92	131	117	102	94	91	98	115	88	84	76	140	98	99	201	204	223	54	96	135	47	112	54	124	100	116	62	79	103	60	70	91	130	114	114	156	63	59	149	107	155
YDL195W	3430	3140	3311	3989	3685	4135	2716	2738	3349	4093	3799	3770	2907	2733	3274	3173	3344	3583	2963	2688	3098	3908	4029	3983	1210	1599	3596	3373	4430	2811	5372	3567	2722	3594	2956	4045	2983	3253	3094	3774	3747	3656	3371	1199	1273	4017	3340	3269
YDL196W	4	3	4	2	0	3	2	5	4	6	4	7	4	2	6	3	3	4	5	2	2	5	6	5	1	2	3	2	5	4	5	2	1	3	6	3	5	5	3	3	4	7	6	1	2	5	1	4
YDL197C	166	146	150	250	219	216	101	113	145	188	174	154	178	138	150	205	189	193	147	127	184	219	229	197	32	78	147	91	182	127	339	111	74	152	156	185	113	148	118	132	146	141	130	54	69	209	122	147
YDL198C	634	605	591	410	444	445	509	460	578	727	593	583	548	519	531	486	553	424	678	587	665	778	670	721	197	290	471	437	879	405	843	722	616	515	574	695	527	532	610	893	937	911	1003	341	401	964	976	816
YDL199C	59	55	57	68	58	69	36	59	67	86	80	84	51	50	55	77	63	54	95	68	83	78	78	57	23	33	57	34	84	36	66	50	50	40	40	57	37	34	58	65	43	55	83	35	31	53	43	47
YDL200C	35	32	35	41	41	68	40	20	46	59	58	47	22	24	26	57	48	46	45	12	27	48	56	51	16	28	26	19	35	16	45	34	34	24	20	36	22	29	27	24	28	29	43	26	26	25	16	27
YDL201W	927	856	879	812	680	692	763	758	914	1021	891	711	881	818	798	967	993	872	651	838	828	1494	1304	1433	358	447	846	811	1171	856	1495	893	774	1026	986	1306	874	908	951	965	826	854	711	290	328	1070	1042	1016
YDL202W	362	310	303	249	223	186	175	152	215	378	291	255	180	140	170	363	378	269	604	324	428	438	404	403	141	152	363	167	558	183	754	374	369	342	369	455	348	332	329	401	348	325	354	159	164	540	449	425
YDL203C	311	285	290	334	287	306	262	216	279	317	306	313	239	211	260	370	412	332	231	237	275	432	462	434	126	198	332	279	416	245	596	291	247	319	269	401	245	258	255	307	292	303	251	93	112	356	324	260
YDL204W	82	64	71	76	72	73	139	121	185	83	73	62	123	93	112	60	51	49	82	72	79	122	102	102	23	40	66	14	31	8	36	21	15	13	18	12	9	15	10	104	91	104	217	36	65	123	120	117
YDL205C	749	692	690	699	579	662	672	605	706	916	782	716	667	684	664	866	846	785	900	773	704	801	752	734	363	416	784	502	1005	523	1026	709	692	664	624	830	607	686	616	734	718	717	986	426	426	833	782	792
YDL206W	132	126	127	168	140	153	83	142	157	145	119	113	107	110	115	104	100	76	231	133	172	260	246	279	45	87	125	58	229	74	182	137	112	120	96	159	89	113	107	99	90	95	187	60	84	96	84	89
YDL207W	263	246	246	324	321	313	237	189	264	285	278	241	218	204	205	321	327	268	252	213	251	310	329	342	102	140	253	185	333	217	430	260	197	274	244	369	208	269	227	245	197	219	251	98	86	305	281	244
YDL208W	2256	2160	2267	1642	1503	1758	2066	1835	2040	2661	2556	2435	1789	2007	1913	2430	2276	2333	1791	2175	2085	3267	2564	3193	803	1057	1922	2367	3549	2127	3333	2829	2916	2467	2474	3260	2367	2188	2328	2138	2262	2387	2317	845	778	2399	2275	2537
YDL209C	102	93	95	128	97	97	74	81	84	130	101	81	111	75	96	126	106	99	87	73	82	163	159	175	32	42	107	73	129	63	174	112	90	67	78	134	66	90	90	110	118	91	71	37	52	114	97	86
YDL210W	4	4	4	9	11	7	0	0	2	21	8	11	1	0	1	10	8	9	7	7	7	8	8	4	3	3	6	0	1	0	1	0	2	1	1	0	2	2	2	2	0	2	1	5	4	1	1	1
YDL211C	72	64	70	66	69	75	62	37	79	80	96	86	90	60	70	70	78	75	75	42	65	124	96	94	17	39	59	39	87	48	83	50	45	61	58	103	48	57	70	84	81	82	90	41	34	97	70	72
YDL212W	1743	1669	1730	1334	1203	1410	1407	1370	1660	2489	2561	2259	1484	1435	1410	1982	1928	1780	1268	1227	1306	2894	2324	2758	778	1037	1660	1664	2635	1358	2373	2030	1931	1635	1583	2234	1587	1541	1704	1625	1853	1884	1910	672	802	1714	1631	1787
YDL213C	532	511	523	468	403	404	354	368	408	584	516	469	574	524	513	547	510	552	363	484	474	797	726	827	150	220	455	485	744	482	796	653	503	601	557	779	553	545	555	618	592	605	459	160	153	638	659	665
YDL214C	74	70	77	33	39	22	79	72	114	94	76	68	53	37	67	97	125	108	29	35	40	191	220	258	31	68	100	45	79	51	110	62	34	58	56	76	49	40	45	70	58	61	70	29	31	107	59	74
YDL215C	512	500	547	644	517	576	368	356	424	512	486	411	316	312	421	446	436	382	543	295	398	986	837	856	535	1128	1605	378	667	365	677	501	716	496	434	548	446	460	446	405	468	452	450	165	184	478	435	419
YDL216C	60	60	58	83	71	79	33	32	35	72	62	71	43	74	48	65	63	56	56	40	54	119	103	120	19	32	53	31	104	30	86	70	63	44	57	65	50	53	66	60	46	48	70	27	36	70	62	49
YDL217C	170	150	147	204	190	139	103	107	163	190	166	143	144	104	127	196	196	176	175	125	129	192	196	185	67	89	151	103	192	115	311	167	140	149	136	195	134	157	108	205	190	183	133	56	74	248	183	172
YDL218W	11	12	10	16	15	15	12	9	3	10	7	9	5	9	7	11	11	6	17	16	7	32	45	44	7	8	22	12	16	2	15	9	5	12	11	13	8	10	5	3	4	5	6	4	7	4	1	2
YDL219W	289	278	273	353	299	327	315	253	347	327	302	299	288	327	259	291	249	231	252	227	252	395	308	379	62	86	172	216	427	209	330	329	222	263	268	337	236	234	250	353	394	351	332	123	100	329	347	363
YDL220C	173	163	168	215	217	189	162	165	217	207	171	170	176	157	189	187	202	161	130	102	137	237	250	279	41	108	143	93	157	125	259	143	119	110	122	155	107	130	113	230	224	232	167	57	79	273	245	214
YDL221W	0	0	0	1	3	1	0	0	0	1	1	0	0	0	0	0	0	1	0	0	1	0	1	1	0	1	0	0	0	0	1	0	1	0	0	0	0	0	0	0	0	1	0	0	0	0	0	0
YDL222C	11	11	12	17	10	13	11	8	8	8	10	14	18	15	15	11	7	15	7	5	6	10	25	24	8	9	8	10	5	4	16	12	4	4	17	9	4	14	9	23	11	12	10	3	6	11	13	26
YDL223C	81	74	71	111	119	94	47	44	35	96	99	85	46	43	48	93	119	83	107	68	80	126	118	147	39	60	133	59	117	58	173	72	46	85	66	90	72	70	71	42	38	31	71	33	38	54	45	24
YDL224C	504	466	484	541	488	527	349	391	459	669	556	580	398	331	424	512	554	464	486	352	370	705	676	695	185	293	507	449	758	342	726	562	448	480	400	602	427	448	498	550	575	637	537	172	237	543	439	476
YDL225W	727	683	707	697	660	683	581	525	663	773	786	660	578	539	625	733	741	686	606	546	577	1179	946	1120	280	376	769	616	1170	561	1038	769	689	787	697	999	722	700	757	797	722	713	710	288	338	802	786	758
YDL226C	587	508	501	959	839	725	401	341	432	751	576	574	532	479	518	754	760	621	530	490	520	646	616	655	195	378	566	381	658	431	1186	516	390	453	422	601	365	456	453	521	409	433	484	182	184	643	499	413
YDL227C	2	1	2	1	3	3	4	4	3	4	0	1	2	1	0	0	1	2	2	2	1	7	3	5	1	2	5	0	3	1	2	0	1	0	0	0	2	1	1	1	0	0	0	0	2	0	0	2
YDL228C	6	8	7	4	5	4	6	3	10	16	5	6	7	9	11	5	17	2	4	4	7	6	7	7	1	3	5	10	9	13	8	11	8	6	9	12	7	7	9	9	8	4	2	3	1	5	14	3
YDL229W	45090	43998	46087	40340	36094	45461	39646	40575	48484	46818	45214	44929	47792	47081	52664	35557	36848	37025	27174	32027	33440	51338	47969	50955	18318	26143	45742	57953	77807	52669	73196	66041	57034	58103	53726	68058	52166	54385	56568	37808	39655	40993	51252	19130	21128	38883	37278	36150
YDL230W	112	101	101	111	89	96	144	166	175	110	85	79	79	82	93	117	104	78	134	111	131	206	240	225	34	57	108	65	131	72	186	90	83	79	90	119	64	71	62	91	68	55	148	58	46	118	77	93
YDL231C	1925	1839	1898	730	657	778	1499	1518	1848	2620	2391	2442	1732	1664	1955	1993	2129	2186	1971	1689	1863	2686	2713	2824	747	1145	1976	1730	2849	1530	2921	2119	1726	1883	1661	2290	1648	1916	1806	2260	2268	2282	2117	780	977	2341	2089	1989
YDL232W	157	151	147	141	139	179	132	111	128	236	197	208	122	138	114	168	163	136	131	145	128	208	187	182	33	68	113	142	222	124	229	195	174	163	189	180	146	152	164	150	170	163	223	48	69	132	135	146
YDL233W	84	74	78	102	116	109	64	74	78	112	68	105	73	91	68	106	116	89	63	63	75	100	95	119	37	27	65	42	92	40	133	62	59	64	57	59	64	68	69	77	61	85	97	26	32	123	90	120
YDL234C	335	323	338	472	454	443	223	354	382	326	259	246	351	487	400	264	276	275	322	299	385	354	366	333	94	154	279	191	605	214	622	263	310	335	236	362	256	283	306	450	357	356	243	75	104	521	374	677
YDL235C	692	673	679	525	513	514	531	573	684	867	860	779	592	607	667	760	768	675	633	628	595	1093	922	1054	330	403	701	650	1132	579	951	794	718	719	704	863	678	662	633	661	650	750	742	214	252	644	664	718
YDL236W	644	589	590	771	687	725	433	407	521	983	833	762	532	496	487	914	876	737	834	644	644	630	587	643	258	352	639	465	801	443	889	580	591	556	589	760	522	588	577	513	511	496	656	258	270	699	631	557
YDL237W	463	436	431	797	666	814	352	340	412	473	444	407	416	404	391	385	352	271	419	287	346	587	556	571	99	200	270	348	760	379	781	566	488	438	468	595	413	459	466	398	434	383	629	250	307	414	352	368
YDL238C	52	44	45	119	114	108	29	29	37	50	49	52	40	38	43	53	38	33	58	40	45	83	75	68	19	26	40	25	53	25	77	34	45	39	29	39	32	38	44	38	39	28	66	22	17	46	42	46
YDL239C	98	100	98	141	156	128	64	79	99	149	142	117	57	73	77	109	128	120	112	97	99	180	151	185	37	70	107	77	131	54	121	74	70	68	50	106	61	94	73	97	100	112	91	32	34	107	117	87
YDL240C-A	0	0	0	0	0	0	0	0	0	0	0	0	0	0	0	0	0	0	0	0	0	0	0	0	0	0	0	1	0	0	0	0	0	0	0	0	0	0	0	0	0	0	0	0	0	0	1	0
YDL240W	316	293	303	502	417	444	250	248	344	408	397	358	274	247	318	398	426	373	341	231	291	362	357	337	109	178	325	185	352	215	499	295	269	270	314	369	244	285	265	268	262	265	352	121	153	277	272	221
YDL241W	263	247	282	106	109	167	115	142	129	150	151	136	250	246	216	138	110	170	81	106	108	477	369	471	62	110	198	403	610	460	584	376	549	436	384	529	396	406	399	292	253	216	162	57	45	288	274	436
YDL242W	2	2	2	0	0	3	3	1	1	6	7	5	0	0	0	2	3	5	7	6	2	3	5	0	0	4	2	0	1	0	1	0	0	0	0	1	0	0	2	2	2	3	11	3	2	1	0	0
YDL243C	55	52	54	47	43	71	65	67	75	17	19	19	70	67	74	23	23	17	37	26	36	107	97	119	7	22	18	34	61	33	66	47	43	38	37	61	38	44	36	96	106	100	83	43	32	100	83	71
YDL244W	1	1	1	1	2	2	3	2	1	1	0	0	1	1	1	0	0	0	4	1	3	0	1	0	0	1	0	0	0	0	1	0	1	0	1	0	1	0	0	3	3	0	1	1	1	1	2	2
YDL245C	0	0	0	0	0	0	0	0	0	1	0	0	0	0	0	0	0	0	0	0	0	0	0	0	1	0	0	0	0	0	0	0	0	0	0	0	0	0	0	0	0	0	1	0	0	0	0	0
YDL246C	0	0	0	0	0	0	0	0	0	0	0	0	0	0	0	0	0	0	0	0	0	0	0	0	0	0	0	0	0	0	0	0	0	0	0	0	0	0	0	0	0	0	0	0	0	0	0	0
YDL247W	0	0	0	0	2	0	0	0	0	0	0	0	0	0	0	0	0	0	0	0	0	0	0	0	0	0	0	0	0	0	0	0	0	0	0	0	0	0	0	0	0	0	0	0	0	0	0	0
YDL247W-A	0	0	0	2	0	3	0	0	0	1	1	1	0	0	0	1	1	0	0	0	0	0	0	0	0	0	0	0	0	0	0	0	0	0	0	0	0	0	0	0	0	0	0	0	0	0	0	0
YDL248W	40	35	32	53	50	53	46	64	75	9	8	11	10	15	9	13	11	9	6	9	3	2	0	0	4	5	20	72	110	47	76	68	65	42	48	71	68	80	75	0	1	0	202	56	47	3	0	2
YDR001C	497	444	455	811	740	728	435	483	532	421	365	340	466	415	478	453	430	375	481	314	344	846	1050	1060	113	135	307	292	613	302	853	366	357	334	309	414	284	319	311	460	461	491	584	208	189	624	457	599
YDR002W	3062	2926	3001	2647	2442	2699	2341	2206	2524	3237	3196	2736	2315	2387	2288	3013	2742	2495	3196	2950	3075	5231	4087	4896	1248	1839	2889	3174	5071	2990	4591	4037	3918	3013	3020	4100	3057	2830	3293	2560	2944	2699	3507	1201	1483	2799	2940	2935
YDR003W	86	84	84	119	99	116	52	84	75	124	102	107	82	73	77	103	91	78	111	68	98	151	152	131	39	58	95	38	119	54	110	85	58	53	62	93	49	57	61	81	80	84	102	57	54	79	79	74
YDR003W-A	25	26	22	27	33	27	23	24	21	34	31	22	21	18	16	26	36	29	31	20	20	42	37	39	7	18	24	15	40	16	27	30	19	18	14	23	18	23	20	22	27	20	29	6	16	29	28	19
YDR004W	208	200	191	186	157	161	160	172	199	319	314	268	166	146	177	300	283	232	191	146	182	301	280	297	66	147	214	160	333	154	325	188	152	188	193	214	159	202	187	196	197	180	182	59	81	227	190	160
YDR005C	335	318	332	351	399	395	261	307	356	303	339	285	276	234	277	266	253	226	364	296	285	580	448	526	132	189	339	266	558	266	426	324	338	303	276	409	304	308	343	369	354	405	474	158	203	343	324	326
YDR006C	783	704	744	919	758	824	620	592	737	949	792	806	564	587	607	938	917	832	776	717	686	1038	1173	1296	288	429	841	661	869	677	1283	685	646	814	708	859	698	755	683	681	669	716	717	248	252	802	658	701
YDR007W	230	226	227	302	252	276	184	172	202	313	265	266	135	190	192	204	234	246	274	220	181	362	331	415	63	91	167	183	348	208	294	280	271	221	234	240	187	204	209	224	253	219	256	89	103	241	231	208
YDR008C	6	6	7	4	9	11	12	9	9	6	4	8	8	5	7	5	4	7	2	4	4	16	15	16	2	1	5	4	8	4	5	8	3	5	6	10	3	2	3	6	8	4	6	1	2	4	11	7
YDR009W	15	15	16	23	17	22	21	12	15	25	27	29	11	11	15	28	19	24	16	11	14	35	51	51	0	6	7	6	11	10	15	14	5	7	11	10	5	8	16	8	10	5	20	5	6	12	14	11
YDR010C	0	0	0	0	1	0	0	0	0	0	0	0	1	0	0	0	1	0	0	1	0	0	0	0	0	0	0	0	0	0	0	0	0	0	0	0	0	0	0	0	0	0	0	0	0	0	0	0
YDR011W	4607	4676	5111	3633	3342	4185	4699	5338	6477	6398	6293	6068	4513	4996	6143	4121	4638	5251	2496	2967	3361	9249	8277	9199	1024	2089	3191	5884	7417	6141	6763	5536	4907	4578	4441	6083	3712	4910	4742	4568	4994	5055	2726	926	1286	4748	3983	4574
YDR012W	6508	6417	6725	5112	4463	5879	6254	6375	7760	5557	4894	5156	6738	7620	7481	3979	4310	3909	5133	5139	5615	5039	4824	5293	2536	3046	6595	7804	11794	8103	10926	10333	8572	8193	8233	10317	7646	8398	8554	7601	6907	8095	7370	2547	2485	7738	7367	7055
YDR013W	160	157	150	152	139	122	149	112	134	171	158	194	133	142	135	147	157	106	138	158	161	291	233	237	74	78	138	126	273	135	249	201	153	148	157	221	142	157	154	129	160	159	173	63	61	178	164	133
YDR014W	153	153	148	181	152	142	101	93	136	161	173	149	118	141	125	132	139	133	194	160	157	266	281	264	54	96	185	110	244	117	233	142	121	140	160	212	138	157	156	176	148	128	124	53	77	165	162	121
YDR014W-A	2	2	2	3	7	2	1	0	2	2	4	4	2	1	0	0	3	1	1	3	1	5	4	5	3	3	3	0	1	0	0	1	1	2	0	2	3	2	1	4	0	0	3	1	0	2	2	1
YDR015C	0	0	0	0	0	0	0	0	0	0	0	0	0	0	0	0	0	0	0	0	0	0	0	0	0	0	0	0	1	0	0	0	0	0	1	0	0	0	0	0	0	0	0	0	0	0	0	0
YDR016C	91	87	85	100	106	92	55	74	85	167	132	133	81	77	67	110	93	82	64	65	55	118	93	119	17	28	46	57	139	74	146	117	104	83	78	114	100	101	95	65	100	93	125	23	35	83	76	80
YDR017C	957	864	883	1344	1061	1082	721	701	882	978	873	833	821	668	845	989	1011	969	752	718	754	1204	1213	1167	286	417	865	793	1242	770	1644	1001	739	1088	938	1230	802	952	909	959	877	978	871	329	341	1099	964	885
YDR018C	11	9	9	7	9	4	4	9	4	20	12	12	7	5	5	18	17	10	6	9	6	17	13	11	13	5	23	0	21	4	18	8	9	11	11	18	17	11	11	2	2	1	20	6	7	2	3	6
YDR019C	262	248	244	563	448	500	136	126	112	409	395	321	111	91	88	343	366	216	176	140	222	195	172	158	254	255	709	75	532	83	499	312	237	251	281	409	229	267	284	49	65	60	577	205	178	64	70	80
YDR020C	214	209	207	173	137	154	183	162	194	257	248	207	186	163	207	211	232	209	159	174	184	315	314	299	53	102	161	211	325	194	336	280	190	242	219	307	225	223	265	232	236	238	214	83	85	218	243	211
YDR021W	371	342	343	330	237	263	322	299	291	427	402	316	316	257	268	439	383	382	340	334	346	654	595	679	104	176	258	341	481	311	557	396	279	385	386	564	344	369	399	358	318	303	286	119	143	356	374	340
YDR022C	45	43	40	61	51	52	48	37	50	82	84	71	32	37	40	68	79	50	47	54	43	86	51	65	10	17	25	17	46	12	34	38	23	21	16	36	20	26	16	44	43	35	53	23	34	51	42	46
YDR023W	8081	7779	7986	8906	8178	8874	6412	6513	7703	8128	8410	7239	6678	6536	7191	7086	7428	6996	7263	6931	7355	9850	8298	9582	2948	4346	7803	9112	14157	8461	13554	9975	8771	9663	8601	12046	8586	8897	9097	7891	7609	7815	7345	3039	3344	7800	7765	7513
YDR024W	309	288	335	491	380	472	276	196	397	297	368	296	196	284	268	345	330	299	325	281	351	466	347	533	141	160	409	271	334	243	443	336	279	224	317	322	174	254	247	360	232	433	221	129	133	409	366	339
YDR025W	11848	11421	11742	11628	10380	12001	11806	10382	13373	13808	11742	11576	11505	12608	12238	11816	12043	10353	8753	11336	11934	10821	9785	10937	4316	6300	12125	12661	18642	15057	22864	15695	13126	14252	15231	17766	12816	13376	13343	9734	8756	9255	9904	3586	3621	11041	11449	9429
YDR026C	432	404	402	413	365	359	373	324	380	494	474	410	373	403	412	482	512	480	416	346	376	664	601	643	107	204	375	394	565	349	679	438	356	472	383	593	329	438	384	429	394	385	362	148	151	486	465	379
YDR027C	533	504	506	625	565	571	385	405	459	555	512	446	530	436	561	482	533	464	486	357	459	1025	941	964	197	273	569	339	759	392	805	543	444	567	476	671	436	504	496	534	543	488	417	173	194	614	542	409
YDR028C	1398	1273	1304	1807	1728	1674	1082	1140	1298	1433	1286	1289	1182	1029	1349	1328	1467	1269	1572	1117	1332	2074	1973	1979	396	703	1308	864	1812	979	2303	1175	1013	1364	1232	1642	1173	1305	1149	1406	1327	1323	1268	476	643	1716	1322	1310
YDR029W	0	0	0	0	1	0	0	0	0	0	0	0	0	0	0	0	0	0	0	0	0	0	0	0	0	0	0	0	0	0	0	0	0	0	0	0	0	0	0	0	0	0	0	0	0	0	1	0
YDR030C	63	61	60	59	50	64	25	26	40	77	43	56	30	33	38	57	50	47	100	58	46	117	140	121	31	45	79	54	118	39	119	76	60	60	64	103	57	75	83	63	58	66	37	20	23	63	57	42
YDR031W	62	63	59	67	67	47	19	25	25	68	64	76	18	31	22	48	49	37	76	53	60	179	139	141	34	28	61	33	129	32	82	96	82	66	70	102	69	67	78	33	43	40	99	37	43	41	41	37
YDR032C	373	350	358	776	549	605	255	250	323	430	264	329	289	325	219	291	307	232	443	271	327	514	572	600	196	284	478	183	520	225	494	441	432	255	316	358	268	303	310	317	318	323	569	214	247	318	311	367
YDR033W	2169	1968	2215	7805	6485	9387	840	1179	978	2366	2950	2619	181	312	226	2002	1759	2026	1359	742	779	2978	2452	3023	534	310	1227	1738	4217	1806	2951	2600	2577	2206	1674	3147	2047	2068	2664	856	799	740	3947	1329	1090	729	650	932
YDR034C	574	517	544	626	572	687	464	474	598	574	571	486	512	399	549	569	613	534	460	382	456	865	769	815	208	313	565	494	830	467	871	503	495	592	517	693	510	574	525	607	493	509	630	232	329	621	513	445
YDR034C-A	0	0	0	0	0	0	0	0	0	0	0	1	0	1	1	0	0	0	0	0	0	0	0	0	0	0	0	0	0	0	0	0	0	0	0	0	0	0	0	0	0	0	0	0	0	0	0	0
YDR034C-C	0	0	0	0	0	0	0	0	0	0	0	0	0	0	0	0	0	0	0	0	0	0	0	0	0	0	0	0	0	0	0	0	0	0	0	0	0	0	0	0	0	0	0	0	0	0	0	0
YDR034C-D	6	5	6	19	16	28	6	9	8	0	0	0	1	0	3	0	0	0	0	0	0	31	38	39	0	0	0	0	0	0	0	0	0	0	0	0	0	1	0	10	4	2	25	3	5	5	7	11
YDR034W-B	10	10	10	2	2	6	4	8	7	19	13	11	9	18	3	11	7	6	14	14	17	8	6	5	8	9	21	12	39	7	26	9	6	5	6	14	9	7	11	6	4	8	6	1	1	11	3	22
YDR035W	1360	1238	1293	1571	1411	1478	1132	1107	1266	1215	1150	1059	1240	1144	1232	1340	1271	1213	879	954	1131	2996	2803	2952	462	809	1322	988	1482	996	1845	1008	946	1155	1038	1455	1042	1044	1009	1478	1355	1291	1294	453	558	1766	1540	1486
YDR036C	435	383	360	579	484	469	289	267	395	428	486	353	321	280	358	354	419	290	654	260	323	359	379	343	95	152	284	195	649	191	665	372	337	379	355	473	371	390	335	522	486	474	637	264	307	675	497	464
YDR037W	10332	9276	9799	13381	11862	13467	12880	12446	14521	7142	6441	6357	11996	11453	12987	7817	8103	7091	4456	5981	6487	21413	19113	20751	2282	3785	6529	8093	10210	8414	15465	7701	6175	8207	7635	10436	7044	7465	7513	11606	10608	10431	10341	4240	4731	12856	12096	11097
YDR038C	41	39	41	97	107	99	93	114	117	5	3	0	49	100	105	1	5	2	14	17	20	163	134	120	9	18	33	5	4	0	5	9	5	3	1	4	1	3	1	8	5	8	156	57	94	6	7	4
YDR039C	0	0	0	0	0	0	0	0	0	0	0	0	0	0	0	0	0	0	0	0	0	0	0	0	0	0	0	0	0	0	0	0	0	0	0	0	0	0	0	0	0	0	0	0	0	0	0	0
YDR040C	29	32	48	43	36	42	22	26	46	7	2	9	14	18	33	3	3	2	106	117	156	35	29	32	75	143	286	14	21	24	25	26	25	12	9	14	7	20	11	3	2	11	56	27	25	6	7	2
YDR041W	303	276	264	185	187	154	138	116	151	262	267	286	153	177	158	257	210	172	614	242	320	368	284	306	91	158	231	171	618	170	553	410	438	335	292	355	293	261	325	354	442	355	444	140	169	325	333	366
YDR042C	16	17	19	20	15	18	9	14	15	24	23	27	5	8	9	26	19	10	13	18	22	31	36	41	10	13	28	20	20	14	19	22	18	14	14	18	14	8	15	13	28	22	20	2	8	7	13	25
YDR043C	165	165	180	84	92	102	139	189	238	220	226	201	109	197	151	205	211	282	101	95	113	107	92	122	39	34	126	137	436	137	323	177	319	234	164	222	197	180	192	193	161	158	194	46	45	198	171	294
YDR044W	804	790	1108	805	745	844	720	799	686	1317	1365	1359	710	692	655	1124	1245	2084	702	767	688	566	629	673	269	393	625	509	1130	582	1231	921	3897	874	696	967	899	706	820	824	737	745	694	230	228	818	788	1766
YDR045C	290	274	282	219	213	264	282	265	303	398	361	337	251	228	250	324	310	315	231	217	205	665	496	538	53	87	130	276	378	252	353	321	278	260	255	401	253	255	261	260	316	321	219	85	80	312	325	291
YDR046C	1336	1309	1372	1556	1436	1646	1353	1533	1770	1633	1530	1532	1287	1388	1399	1379	1354	1317	559	759	857	1656	1538	1790	393	533	1051	1108	1910	1153	1984	1486	1671	1205	1172	1442	1072	1178	1138	1666	1686	1807	1310	482	498	1884	1645	1516
YDR047W	629	585	581	615	520	521	330	378	504	974	813	727	441	423	390	916	864	760	674	615	632	521	529	551	248	296	573	430	908	543	1267	792	644	691	691	966	670	701	717	521	468	402	519	241	239	618	540	550
YDR048C	1	1	0	1	1	1	0	2	0	0	0	0	1	1	1	1	0	1	0	0	0	3	3	1	1	0	0	1	1	1	0	1	1	1	1	0	1	0	0	0	0	1	0	0	0	1	0	0
YDR049W	421	400	408	449	379	365	335	322	397	458	422	346	348	328	412	441	428	401	325	391	427	615	657	620	167	233	440	348	580	415	781	412	316	447	459	637	362	448	442	422	361	347	348	144	153	465	432	400
YDR050C	25874	24253	25391	25007	24103	26019	21805	21668	26240	25570	23724	23946	21036	23015	21272	20623	20249	17916	32381	20688	20810	26616	23572	27724	9129	13219	19538	29953	40047	31806	39305	33720	35537	25712	26397	33927	26633	26393	27786	26864	26846	27391	29004	11541	13551	28469	28608	27409
YDR051C	351	325	336	333	305	369	261	249	346	435	370	323	259	304	281	309	315	256	317	251	256	604	496	552	142	215	340	299	534	241	493	398	393	406	335	526	340	328	404	296	310	284	440	142	150	338	325	315
YDR052C	515	471	487	552	506	498	450	410	502	525	479	408	545	482	580	563	554	501	425	389	477	765	817	790	135	242	477	421	561	485	876	415	335	554	506	626	396	549	429	546	457	482	385	174	168	588	528	547
YDR053W	0	0	0	1	0	0	0	0	0	0	0	0	1	3	3	0	0	1	1	0	0	1	2	0	0	0	0	0	1	2	1	0	0	0	0	0	0	0	0	1	1	0	0	0	0	0	0	0
YDR054C	801	751	790	711	670	696	680	712	777	924	946	791	705	680	734	852	798	797	802	713	778	1210	1022	1140	318	472	801	718	1085	712	1163	798	763	708	684	1001	746	716	765	802	771	845	864	353	407	818	845	837
YDR055W	652	635	627	885	798	989	303	417	433	645	597	580	351	441	383	433	432	414	758	266	384	1301	1159	1395	13	16	33	474	1598	437	1168	753	732	594	573	893	643	609	820	954	986	813	332	127	196	921	748	903
YDR056C	308	302	301	416	387	430	219	253	302	368	296	324	285	272	261	351	282	259	289	265	259	436	377	406	128	209	263	252	477	239	403	395	348	260	278	393	274	300	309	288	281	297	348	156	135	305	306	283
YDR057W	237	217	229	258	202	283	153	183	220	329	280	254	193	194	201	284	248	215	247	199	218	384	318	353	99	144	255	169	342	188	359	242	170	225	184	307	195	212	238	234	218	215	190	61	91	243	231	222
YDR058C	64	64	64	45	46	32	47	54	44	86	95	82	36	62	56	68	73	66	128	78	76	125	101	119	37	73	105	30	91	33	88	48	56	49	58	59	37	38	76	43	57	44	84	24	35	64	56	80
YDR059C	60	58	56	60	59	75	55	58	66	62	54	50	52	62	42	41	43	38	55	55	46	162	132	123	29	47	58	26	84	26	72	67	49	35	46	45	45	40	55	49	43	42	103	44	64	59	43	58
YDR060W	4966	4544	4761	4460	3715	3954	4108	4082	4727	5724	4952	4461	4612	3950	4655	5471	5617	5781	3862	4497	4772	6797	6652	7223	1867	2458	4960	4702	6203	4697	7808	4949	3729	5931	5106	6739	4602	5254	4896	4969	4304	4584	3894	1604	1600	5677	4814	4633
YDR061W	331	306	317	429	390	446	107	111	102	363	341	326	221	248	273	297	331	263	679	424	475	460	366	421	214	308	540	193	486	181	445	298	331	280	281	363	232	281	281	291	265	245	451	190	212	305	267	302
YDR062W	2432	2409	2433	2325	2010	2479	2030	2156	2411	2704	2666	2498	1995	2038	2140	2123	2149	2183	2118	2057	2109	3162	3032	3118	964	1469	2453	2711	4425	2583	3920	3247	2665	2741	2559	3386	2442	2723	2619	2296	2444	2320	2591	938	1229	2356	2227	2305
YDR063W	280	287	281	329	319	374	200	228	240	307	338	298	234	271	241	285	297	269	195	171	199	418	330	427	47	81	150	281	590	241	486	398	409	309	312	410	326	300	338	248	302	269	298	101	103	235	272	251
YDR064W	17198	16776	17196	14842	13354	15963	16186	14945	18833	18874	17836	18016	15847	17567	16260	15072	14869	12944	12629	14624	14953	15108	12376	14504	5856	5923	13387	20046	29972	20072	29843	25793	23091	18781	21054	25100	19190	18549	21303	16627	19150	19323	21201	6807	6612	17872	18826	17573
YDR065W	163	176	165	146	158	146	117	134	146	185	157	160	144	154	140	127	177	152	128	161	161	300	291	294	50	82	160	187	362	133	264	255	190	173	159	269	160	201	182	139	146	126	182	74	97	149	135	122
YDR066C	48	47	46	50	32	47	25	26	40	59	48	50	42	39	41	40	43	36	47	45	38	89	80	65	13	27	34	43	77	39	68	59	50	54	54	67	40	45	56	46	51	50	47	22	28	52	63	54
YDR067C	188	166	181	146	158	155	149	146	195	216	192	208	161	188	179	160	159	131	167	145	154	381	266	331	61	90	175	154	261	156	278	180	187	146	145	236	179	162	169	183	165	169	244	71	82	202	162	190
YDR068W	238	231	235	251	233	276	214	227	272	259	254	233	233	243	191	229	197	177	273	207	233	341	307	349	75	111	240	225	367	182	332	304	258	224	242	266	194	215	251	205	221	250	245	90	94	268	241	254
YDR069C	241	227	224	271	232	295	177	191	198	251	243	243	162	186	205	190	226	207	269	179	214	656	588	566	61	127	223	180	321	121	308	213	165	189	169	231	174	193	187	266	216	212	215	83	105	247	235	184
YDR070C	7	5	4	8	6	10	4	1	5	16	10	5	3	3	2	17	10	6	9	3	4	18	12	9	0	0	2	2	8	1	6	4	7	4	3	4	3	3	2	7	6	2	10	1	1	3	4	5
YDR071C	1217	1181	1213	1345	1181	1282	1154	1096	1419	1184	1159	1130	1074	1124	1094	959	979	854	1066	952	1040	2011	1669	1838	433	572	1018	1016	2040	904	1663	1408	1415	1168	1132	1572	1149	1131	1305	1254	1475	1434	1435	434	492	1349	1356	1394
YDR072C	987	919	984	891	724	936	988	912	1174	1027	898	877	895	978	1036	775	802	765	893	780	845	1147	993	1141	268	378	621	959	1768	915	1968	1217	1157	973	865	1313	864	955	1027	1183	1171	1379	766	257	279	1214	1085	1300
YDR073W	193	184	188	185	173	171	211	176	251	176	147	167	188	190	151	163	164	121	189	169	199	207	212	223	59	108	202	123	275	174	356	235	208	154	208	267	188	165	184	211	202	223	228	86	65	259	252	218
YDR074W	955	830	830	951	998	937	552	641	760	1077	1002	994	593	778	613	943	993	867	1141	701	784	803	874	962	235	390	736	507	1780	465	1910	735	884	876	684	944	858	783	804	982	797	906	1654	361	385	1236	939	1407
YDR075W	175	157	165	174	178	194	142	110	180	219	221	177	142	157	139	224	225	192	194	134	142	288	243	254	69	95	166	145	187	100	248	157	147	144	152	230	109	135	151	159	151	167	155	60	77	207	148	152
YDR076W	62	56	55	73	63	61	43	47	67	94	75	72	48	41	49	124	114	103	35	44	70	115	121	104	16	27	52	47	71	34	109	46	32	45	43	52	38	32	42	43	55	35	50	26	21	55	29	37
YDR077W	4598	4540	5247	8847	7660	9005	5514	5909	7914	162	132	130	5955	7046	7593	97	88	98	6068	3510	5156	3031	2967	2784	4642	4858	8963	1557	9545	1544	7706	5917	5581	4117	3170	5745	4022	3379	4770	6645	6974	6722	4269	1527	1342	6333	5422	11364
YDR078C	56	53	55	33	40	40	39	45	54	118	108	117	25	40	31	104	87	90	52	35	38	89	77	103	13	17	28	46	77	47	70	57	52	46	45	46	48	39	49	49	51	61	52	11	11	54	66	62
YDR079C-A	36	33	35	41	30	46	21	34	33	41	34	25	48	39	37	30	19	20	27	18	23	92	63	77	12	12	26	14	55	22	38	39	44	37	30	45	33	29	26	35	46	47	35	12	7	34	35	42
YDR079W	103	91	86	90	78	80	53	57	75	91	100	98	50	48	54	105	77	58	151	68	95	157	109	132	39	41	77	47	181	44	160	99	104	105	103	112	102	89	87	122	138	123	145	52	39	131	126	119
YDR080W	291	266	271	415	384	326	218	210	294	344	267	289	265	218	279	373	363	308	256	222	251	349	388	418	126	168	324	200	364	194	510	262	182	225	238	299	184	228	236	272	273	258	270	110	144	354	297	265
YDR081C	524	487	502	629	526	502	398	417	527	624	561	559	391	364	470	655	697	598	434	439	492	774	782	804	202	319	630	360	641	419	960	454	429	463	459	574	411	433	384	481	519	456	538	199	232	536	499	457
YDR082W	148	141	135	124	121	135	121	127	116	184	222	161	112	131	108	168	191	159	140	114	126	310	230	234	51	74	133	108	202	102	226	141	134	136	111	170	120	129	136	144	132	143	137	65	65	133	119	98
YDR083W	761	716	748	687	509	589	620	640	668	907	776	662	768	706	706	777	708	767	555	695	614	1086	941	1137	277	343	667	702	1160	673	1098	827	737	852	783	1137	756	820	847	737	766	825	758	307	311	840	761	873
YDR084C	226	224	219	262	243	311	144	167	182	304	317	292	193	206	162	180	233	181	199	172	176	327	275	309	52	83	147	189	401	200	354	267	232	208	212	287	205	203	209	246	264	243	291	92	143	234	220	206
YDR085C	42	35	42	72	61	58	44	53	58	29	21	24	49	51	57	36	21	19	62	52	52	74	70	68	19	19	63	14	37	16	49	22	25	25	25	29	27	13	20	33	36	27	52	18	22	39	31	86
YDR086C	1421	1358	1385	1112	1110	1147	1220	1183	1365	1609	1593	1551	1350	1233	1127	1392	1281	1102	1286	1284	1383	2016	1463	1710	390	547	1162	1287	2242	1196	1975	1800	1693	1505	1481	1946	1375	1314	1583	1450	1814	1572	1850	488	552	1491	1543	1689
YDR087C	914	834	876	646	543	580	689	617	723	1109	985	907	1012	913	904	1017	942	978	677	770	799	1603	1332	1642	327	441	824	769	1153	745	1425	980	882	984	897	1211	746	785	864	863	966	851	819	275	337	1029	909	892
YDR088C	156	148	146	164	124	164	122	107	97	129	142	149	129	138	138	146	115	112	130	122	127	417	402	408	60	88	147	85	224	83	190	129	107	152	121	170	98	112	121	161	172	131	171	62	65	185	159	164
YDR089W	707	655	664	724	634	641	805	668	847	923	836	688	581	391	429	801	817	716	348	426	602	1033	886	1007	304	332	684	618	1236	657	1596	919	792	890	911	1221	744	821	931	451	451	307	369	122	116	415	376	323
YDR090C	168	163	165	177	166	199	139	144	147	246	214	231	127	150	167	194	186	172	150	111	137	281	229	272	73	125	195	142	236	129	238	169	133	123	162	191	123	173	136	158	182	169	179	54	71	165	144	126
YDR091C	4911	4679	4966	3513	2935	3839	4270	4186	4597	4974	5182	4942	4613	4555	4828	4113	4092	4429	4652	5254	5153	6276	5470	6294	2330	3145	5558	5309	7032	4623	6629	5711	4693	5269	4630	6658	4922	5054	5118	5439	5492	5778	5895	2269	2504	5457	5175	5473
YDR092W	275	252	260	353	310	336	264	231	312	363	294	308	265	268	241	273	255	240	271	215	255	427	357	372	103	144	240	177	353	197	355	230	228	215	218	277	181	189	193	276	290	280	279	121	131	318	302	285
YDR093W	1901	1755	1799	2094	2001	2033	1562	1498	1893	2273	2026	1937	1571	1435	1633	1942	1951	1845	2097	1471	1633	1990	2147	2137	699	1100	1864	1930	2826	1741	3541	2286	2046	1804	1796	2378	1696	1962	1922	1718	1689	1626	1728	551	778	1869	1590	1516
YDR094W	0	0	0	0	1	0	0	0	0	1	0	0	1	1	1	1	0	0	0	0	0	0	1	0	0	0	0	0	0	0	1	0	0	0	0	0	0	0	0	2	0	0	0	0	1	0	0	0
YDR095C	1	1	0	0	0	1	0	0	0	0	0	0	0	1	0	1	1	0	0	1	0	1	1	0	0	0	1	0	2	0	2	1	1	0	2	0	0	1	0	2	0	2	2	0	0	1	0	0
YDR096W	363	329	343	327	318	334	276	254	315	409	386	383	277	235	308	363	363	370	327	292	354	447	428	432	122	195	383	195	501	205	701	387	348	322	296	419	302	324	317	418	407	411	441	176	176	520	378	395
YDR097C	892	824	820	1174	1069	1073	778	764	967	860	709	698	896	634	729	849	863	651	866	822	982	1126	1250	1246	368	409	1001	694	1214	637	1629	892	671	793	811	1085	738	940	815	820	849	740	804	320	385	987	810	625
YDR098C	661	611	640	841	730	833	584	493	720	608	611	475	628	616	585	575	489	476	562	599	676	1128	895	1018	212	382	636	530	949	537	1046	657	555	574	585	823	527	600	640	629	605	663	795	304	316	682	654	641
YDR098C-A	0	0	0	0	0	0	0	0	0	0	0	0	0	0	0	0	0	0	0	0	0	0	0	0	0	0	0	0	0	0	0	0	0	0	0	0	0	0	0	0	0	0	0	0	0	0	0	0
YDR098C-B	0	0	0	2	2	4	0	0	0	0	0	0	0	0	0	0	0	0	0	0	0	0	0	0	0	0	1	0	0	0	0	0	0	0	0	0	0	0	0	0	0	0	0	0	0	0	0	0
YDR099W	3115	2994	3002	3449	3194	3336	2348	2380	2967	3442	3695	3263	2740	2510	2702	2931	2918	2506	3678	2532	2878	4950	4106	4353	1108	1712	3134	2639	5212	2426	4457	3420	3264	3068	2932	3957	2835	2983	3064	3148	3274	2995	2865	1039	1330	3073	3000	2848
YDR100W	100	99	99	192	179	191	64	73	103	108	125	137	92	93	82	127	106	80	128	76	82	109	102	116	47	76	95	50	166	80	122	112	92	77	80	96	98	79	92	76	82	92	139	46	73	64	83	77
YDR101C	3808	3532	3694	2671	1992	2248	3334	3272	3709	4346	3960	3388	3411	3151	3387	3957	4054	4322	2815	3657	3410	5395	5160	5596	1559	2007	3691	4027	5324	3908	6409	4251	3503	4697	4205	5620	4091	4067	4098	3399	3241	3370	3191	1273	1370	3825	3367	3787
YDR102C	0	0	0	0	0	1	0	0	0	0	0	0	0	0	0	1	1	0	0	0	0	3	1	1	0	0	0	0	0	0	1	0	1	0	1	0	0	1	0	0	0	0	0	0	0	0	0	0
YDR103W	73	64	68	95	82	87	65	63	73	87	76	70	82	75	106	84	101	78	98	64	95	118	109	124	39	42	81	58	58	38	97	53	23	58	46	62	40	45	37	59	59	57	57	27	30	58	57	54
YDR104C	213	197	193	298	238	239	120	111	140	323	258	233	137	141	148	256	326	227	258	162	230	314	329	323	81	138	227	139	301	125	365	177	150	185	161	245	157	184	200	178	161	180	155	75	99	223	195	126
YDR105C	344	334	346	384	363	429	307	309	378	418	430	405	278	294	280	324	311	314	332	246	281	550	511	538	121	140	258	275	556	269	489	385	364	294	313	419	274	333	344	358	379	364	405	167	179	357	269	364
YDR106W	16	15	17	12	17	18	12	7	10	23	20	13	7	15	12	23	19	23	6	10	10	67	47	52	4	7	13	8	14	12	27	10	16	19	18	18	13	11	19	5	8	15	13	4	6	8	12	12
YDR107C	210	210	200	352	266	318	137	125	171	301	330	269	142	138	148	223	272	192	302	210	204	236	193	206	129	155	285	135	403	128	283	240	219	188	208	280	201	215	245	121	163	121	261	118	120	140	111	97
YDR108W	286	271	276	275	238	254	227	236	295	340	324	284	260	257	278	271	308	276	260	222	275	460	398	429	92	154	259	287	420	217	446	297	285	302	275	352	234	291	253	249	282	291	273	106	132	311	264	261
YDR109C	183	159	167	234	198	180	133	140	192	243	185	195	135	130	166	256	234	205	224	150	177	219	219	234	62	101	194	126	177	124	302	181	142	151	151	180	116	143	137	152	153	142	149	45	74	243	178	159
YDR110W	389	361	367	362	311	323	332	356	392	452	398	313	348	333	373	389	407	334	292	255	263	663	637	713	149	209	388	312	437	277	521	362	276	356	328	508	370	362	348	421	391	393	354	155	175	521	478	425
YDR111C	263	238	259	290	295	315	293	267	304	298	242	279	235	231	256	288	299	311	169	245	239	280	290	327	71	90	164	250	271	254	344	185	214	273	230	271	239	199	195	329	277	305	247	125	119	335	324	337
YDR112W	0	0	0	0	0	0	0	0	0	0	0	0	0	0	0	0	1	0	0	0	0	3	1	1	0	0	0	0	0	0	0	0	0	0	0	0	0	0	0	0	1	0	0	0	0	1	2	0
YDR113C	168	151	149	240	200	211	147	135	200	162	142	148	174	157	124	203	224	167	156	122	162	209	208	206	45	81	184	95	176	96	267	117	93	152	174	184	128	173	115	165	141	145	163	60	77	216	149	127
YDR114C	1	1	0	2	1	0	0	0	0	1	2	0	0	0	0	1	0	0	0	1	0	2	2	1	0	0	1	0	2	0	1	2	0	2	0	0	1	0	2	0	0	0	0	1	0	0	0	0
YDR115W	309	288	278	172	146	152	142	120	147	336	329	287	150	128	152	283	296	221	620	283	316	339	249	331	108	192	287	185	617	177	508	412	394	307	320	434	312	280	326	391	433	370	392	132	149	396	379	427
YDR116C	411	373	366	226	204	179	174	176	239	431	448	380	199	225	214	436	360	284	834	376	458	495	418	439	146	227	389	189	681	218	773	394	374	359	389	543	410	365	419	508	578	539	419	191	196	561	561	613
YDR117C	445	426	435	594	541	580	334	315	435	471	502	417	411	398	424	412	438	351	404	417	423	626	521	583	176	222	459	405	680	428	692	497	399	520	453	598	420	453	454	411	385	362	383	163	178	421	411	432
YDR118W	172	167	175	173	167	196	125	118	153	209	208	199	175	143	175	200	190	185	163	130	138	305	258	250	69	101	203	122	258	138	240	170	150	131	169	207	139	141	178	172	191	175	148	59	73	203	199	201
YDR118W-A	3	3	3	7	3	3	3	2	3	5	3	2	5	2	4	4	7	4	2	0	0	4	4	4	0	2	4	1	4	5	8	2	3	3	0	4	1	5	5	2	2	0	1	1	1	1	1	3
YDR119W	2184	2060	2084	1965	1598	1854	1733	1635	2058	3060	2804	2468	1889	1806	1963	2268	2416	2178	1794	1691	1845	2426	2331	2431	820	1051	2007	2137	3148	2047	3702	2634	2135	2170	2175	2743	1834	2234	2237	2435	2427	2315	2084	763	902	2437	2183	2082
YDR119W-A	27	24	27	2	4	6	12	16	19	108	125	129	18	14	19	93	95	113	7	13	10	9	5	8	5	15	11	8	14	10	41	27	12	6	5	28	4	8	10	5	3	1	90	19	30	3	4	5
YDR120C	1200	1072	1107	1140	935	970	1096	1075	1182	1314	987	983	1238	1094	1237	1349	1260	1331	805	1027	1001	1688	1666	1734	401	550	1048	928	1376	938	2162	1041	812	1239	1118	1516	972	1113	1064	1236	1087	1092	924	394	404	1513	1352	1288
YDR121W	213	207	209	206	220	216	220	166	223	218	211	214	189	187	154	186	183	182	181	151	167	361	269	350	95	165	254	149	293	171	292	197	218	192	226	259	185	199	171	262	277	228	229	93	83	233	261	241
YDR122W	437	387	385	1020	908	793	327	316	407	374	326	318	312	345	390	386	391	248	413	282	351	854	774	789	114	197	352	234	477	231	717	314	293	275	233	354	236	263	289	431	394	427	387	172	185	476	416	343
YDR123C	147	144	150	150	150	159	126	107	127	155	138	141	138	160	155	132	156	137	164	144	148	140	152	160	50	75	165	138	247	180	261	174	148	171	148	219	135	158	167	142	142	164	126	58	48	171	145	125
YDR124W	16	18	18	18	28	21	21	24	24	10	11	16	17	25	25	13	16	28	13	19	22	45	28	29	5	7	11	8	19	11	15	13	18	15	14	12	9	11	9	11	15	10	23	12	10	24	23	22
YDR125C	42	40	39	54	37	60	20	21	34	61	67	51	33	36	23	57	57	54	40	37	29	79	61	53	10	21	43	24	71	38	79	41	27	49	44	60	39	42	47	25	22	27	37	15	23	26	25	22
YDR126W	107	104	103	65	63	78	76	104	85	127	109	130	81	81	69	98	101	88	85	66	71	245	206	251	35	57	88	120	190	111	164	154	105	117	116	140	133	123	113	81	94	89	98	21	34	82	77	93
YDR127W	4871	4478	4576	5943	5457	5611	3623	3872	4619	5287	4616	4732	4094	4043	4494	4309	4801	4438	2899	2522	2913	6171	6067	6416	824	1571	2217	4789	5263	4069	7003	4487	4052	3787	3445	4632	3481	4000	3897	7781	8172	7892	4595	1656	2087	8480	7191	6568
YDR128W	483	439	431	789	739	607	472	478	511	604	520	463	403	387	439	575	617	530	409	341	365	652	637	634	154	276	460	287	489	241	719	385	263	340	297	430	314	334	349	470	447	468	487	184	223	574	448	476
YDR129C	2487	2354	2383	3533	3154	3417	1832	1908	2380	2913	2558	2322	2135	2070	2145	2426	2467	2316	2075	2110	2399	2962	2888	2895	736	1271	2101	2194	3938	2323	4427	2598	2246	2840	2489	3296	2286	2505	2486	2296	2258	2183	2020	721	908	2628	2379	2329
YDR130C	122	112	109	151	124	143	105	80	116	165	143	153	115	95	90	156	150	111	119	80	95	187	183	137	28	54	104	90	160	84	154	121	117	101	118	123	99	123	107	132	106	102	103	47	50	120	91	102
YDR131C	144	136	133	170	138	144	110	119	143	134	178	125	108	122	131	122	131	118	128	123	132	343	269	282	59	82	123	102	199	79	179	121	92	126	93	152	118	100	114	147	154	146	169	62	69	150	156	149
YDR132C	96	94	92	107	120	103	59	76	119	156	163	158	77	87	101	144	143	110	119	87	86	174	169	135	29	58	110	58	97	43	102	47	36	49	69	85	43	66	53	91	90	98	117	37	45	122	105	99
YDR133C	193	189	198	101	95	122	209	151	211	239	210	218	203	202	193	197	186	165	129	119	105	220	189	243	163	171	321	93	323	107	335	271	253	147	216	259	209	215	253	167	181	184	295	154	159	188	149	173
YDR134C	635	641	645	363	330	403	626	574	770	917	711	883	768	816	592	568	570	583	416	455	441	756	811	878	341	354	907	272	1027	378	1119	1037	826	663	777	889	703	733	687	576	642	564	911	262	337	530	522	540
YDR135C	3387	3235	3341	4061	3508	4073	2385	2665	3132	5044	4481	4271	2340	2290	2693	3388	3775	3603	3746	2728	3083	6614	6175	6653	1839	2912	4776	2220	3968	2046	4015	2960	2105	2543	2483	3039	1847	2161	2054	3625	3761	3935	3261	1263	1662	3872	3392	2987
YDR136C	2	2	2	5	1	3	0	1	2	1	3	6	1	2	0	7	7	2	3	1	1	8	4	4	1	0	0	1	3	0	0	1	3	0	3	0	3	2	2	1	2	2	1	0	1	1	0	2
YDR137W	410	404	399	353	336	393	313	343	358	438	447	405	363	315	330	391	383	346	429	343	368	699	593	672	126	253	377	352	711	322	634	472	448	396	404	484	393	479	460	371	421	422	464	155	188	428	408	418
YDR138W	509	473	481	507	480	528	448	409	506	508	492	487	459	400	470	467	497	433	463	417	433	846	775	720	210	303	570	446	702	400	807	525	383	551	471	660	435	479	519	469	482	455	462	166	190	559	497	463
YDR139C	362	335	331	404	366	337	285	251	335	431	388	372	303	321	281	353	333	296	339	295	316	662	574	652	62	88	193	314	504	237	475	368	361	343	318	433	329	288	353	335	425	334	413	131	104	384	372	363
YDR140W	183	177	175	168	154	163	142	151	163	207	242	174	153	144	164	228	194	145	180	151	176	303	253	247	44	82	140	182	309	180	287	216	193	171	189	260	186	171	188	146	176	160	196	71	105	159	146	167
YDR141C	1138	1029	1068	1896	1581	1707	853	854	1013	1132	992	1002	921	866	1052	1015	1092	989	1201	929	1063	1626	1545	1532	449	687	1294	889	1408	748	1752	1109	873	1024	899	1198	881	1005	951	1089	1023	1081	1175	426	495	1160	1013	1028
YDR142C	161	151	155	158	141	174	131	125	154	204	167	154	136	148	118	142	170	123	142	111	141	244	278	253	62	112	164	94	252	117	278	134	165	142	131	206	175	157	180	149	148	140	185	55	70	170	133	165
YDR143C	622	540	586	542	513	525	445	434	535	683	605	540	435	397	491	718	681	690	544	491	567	709	857	827	226	292	629	628	757	679	1209	568	462	646	584	724	527	536	592	690	593	589	524	188	209	806	611	725
YDR144C	1871	1782	1794	1444	1290	1485	1614	1665	1825	2141	2024	1861	1739	1631	1751	1562	1694	1654	1586	1650	1663	3662	3284	3297	1060	1440	2343	1954	2704	1764	2517	2088	1580	1937	1765	2286	1754	1838	1763	1519	1487	1525	1993	806	824	1578	1366	1291
YDR145W	647	593	621	610	592	677	570	495	660	606	572	526	638	536	623	556	541	548	571	587	708	998	976	992	205	354	599	485	829	552	1073	538	400	775	613	879	571	636	636	709	650	656	588	258	220	754	719	639
YDR146C	380	341	361	539	539	486	304	245	347	407	350	317	258	281	416	394	436	406	317	259	323	755	625	618	136	212	407	353	449	351	595	348	284	364	347	463	302	320	306	307	262	286	258	91	107	411	357	291
YDR147W	294	268	282	342	318	327	246	207	279	349	349	309	246	192	260	385	385	356	265	232	280	419	357	420	127	159	293	252	384	245	457	274	234	281	294	340	232	264	272	248	238	235	259	120	130	304	245	255
YDR148C	902	884	819	1104	899	943	595	553	703	692	583	613	604	625	635	710	811	566	706	829	1008	1132	1024	1143	255	338	595	505	1833	605	2147	1232	994	1118	1195	1323	1036	1108	1091	834	795	807	1085	480	482	1013	954	773
YDR149C	0	0	0	0	0	0	0	0	0	0	0	1	0	0	1	0	0	0	0	1	0	0	0	0	0	0	0	0	0	0	0	0	0	0	1	0	0	0	0	0	0	0	0	0	0	0	0	0
YDR150W	2323	2204	2285	3013	2653	3365	1394	1588	1968	2429	2118	2006	1562	1440	1821	1844	1920	2033	2086	1691	2174	3722	3509	3836	733	1133	2479	2183	3578	1893	3149	2869	1792	3188	2600	3529	2894	3261	2669	2141	2074	2151	2059	692	863	2447	1931	1699
YDR151C	294	293	287	277	282	300	234	264	300	414	341	321	184	199	208	300	339	259	210	215	229	497	420	465	77	133	292	273	487	289	537	340	245	315	318	474	274	366	284	306	268	276	206	105	97	308	323	267
YDR152W	896	836	879	835	660	788	662	640	766	986	848	737	682	745	703	849	784	741	904	800	898	1385	1211	1373	387	506	919	883	1408	926	1366	1027	889	958	833	1314	868	920	993	874	860	857	815	350	364	989	945	911
YDR153C	664	601	639	628	506	536	554	585	649	747	670	588	598	465	638	815	748	706	558	618	713	959	936	987	202	291	667	541	827	673	1120	648	452	765	644	897	569	675	649	665	539	572	467	197	200	773	665	663
YDR154C	611	621	610	866	678	845	566	503	712	611	533	569	521	688	561	502	466	371	638	572	559	824	819	870	310	375	548	520	993	643	1032	854	718	451	691	614	468	593	543	581	599	654	768	320	407	513	625	532
YDR155C	3693	3541	3601	4534	4238	4362	3041	3118	3925	4056	3645	3734	3159	3073	3368	2892	2916	2422	4147	3399	3885	5215	4823	4957	1078	1374	3202	3689	6126	3817	5464	4728	3888	3577	3716	4686	3278	3748	3952	3494	3712	3232	4225	1084	1446	3548	3422	3141
YDR156W	172	152	169	162	192	153	135	128	163	245	150	252	142	182	132	292	236	197	99	89	118	130	162	190	48	66	111	132	181	289	412	262	190	141	177	187	118	141	193	93	109	113	160	57	42	270	150	210
YDR157W	23	22	23	17	22	20	16	10	20	39	26	28	22	22	11	34	33	35	16	25	26	18	37	37	17	10	36	25	31	33	41	35	20	27	25	20	24	23	16	19	15	14	16	6	8	16	14	17
YDR158W	1731	1645	1750	2184	2215	2910	1414	1385	1798	1944	1466	1332	1747	1795	1688	1400	1476	1663	1247	1225	1328	2310	2053	2226	511	657	1170	1366	1913	1412	2072	2157	1816	1560	1546	1979	1444	1572	1614	2270	2125	2090	2053	603	711	2441	2491	2518
YDR159W	789	728	745	850	763	820	582	674	708	878	815	807	681	608	715	822	785	755	702	609	760	1427	1438	1362	247	379	745	656	989	589	1274	744	563	780	660	972	675	747	673	762	706	799	642	212	243	854	798	668
YDR160W	235	211	223	284	288	277	177	179	217	327	262	243	202	221	211	293	268	258	272	210	197	355	301	367	73	108	211	170	265	179	343	190	169	197	173	280	175	221	193	217	202	237	180	67	74	259	208	233
YDR161W	1008	939	968	968	788	867	715	797	838	1109	932	820	973	927	941	1048	978	1002	630	790	856	1540	1452	1530	369	502	904	900	1357	993	1663	978	874	1099	1074	1453	1019	1059	1017	1072	944	945	835	368	351	1185	1136	1126
YDR162C	142	136	142	134	134	140	114	116	121	209	183	177	106	110	115	170	158	137	99	120	127	205	167	183	53	78	149	141	232	142	223	148	171	136	148	185	131	145	149	132	115	138	124	48	59	156	131	131
YDR163W	69	68	69	78	76	88	45	44	70	89	83	53	65	60	49	85	74	68	69	67	80	110	115	122	26	32	87	49	98	35	75	81	65	56	51	90	50	64	80	86	76	75	73	24	19	79	70	57
YDR164C	536	509	523	588	487	549	437	443	515	655	618	518	443	445	522	580	593	545	520	429	553	734	738	743	201	325	601	447	745	419	855	518	461	568	512	688	439	581	538	493	505	483	436	153	192	641	546	525
YDR165W	1633	1560	1580	1437	1205	1342	1487	1588	1716	1773	1655	1463	1509	1451	1590	1556	1607	1459	1129	1387	1300	2333	2139	2331	583	833	1464	1625	2349	1532	2635	1802	1507	1656	1613	2192	1572	1679	1720	1904	1707	1770	1472	615	646	1817	1769	1665
YDR166C	651	600	623	773	668	703	500	516	629	690	636	602	568	519	650	625	677	620	530	580	615	1076	902	1021	240	319	719	557	916	474	1043	572	504	654	591	807	542	628	586	605	604	609	636	247	255	728	619	557
YDR167W	175	162	168	172	145	172	151	120	147	215	160	188	131	165	130	162	152	141	163	134	155	243	200	225	77	112	161	134	243	133	263	214	210	193	179	223	161	150	186	158	202	178	224	83	77	171	176	191
YDR168W	1065	1019	1050	1326	1212	1260	882	875	1084	951	1100	913	1026	947	1012	832	849	812	1068	840	976	2052	1696	1803	327	634	1042	869	1621	752	1322	1038	1055	989	808	1227	856	931	990	1209	1191	1190	1042	368	435	1224	1170	1200
YDR169C	194	174	178	267	271	238	126	117	156	211	166	175	168	133	204	198	235	177	165	169	174	296	296	275	46	72	156	170	281	168	372	160	132	187	146	250	132	163	175	181	169	158	187	64	75	211	171	160
YDR169C-A	4	3	3	3	5	4	1	0	0	11	2	6	2	1	2	4	8	4	5	1	6	5	4	4	1	3	1	2	4	4	9	6	3	4	2	4	2	1	4	1	1	0	2	1	0	2	1	0
YDR170C	3931	3610	3794	5738	5083	5622	2678	2939	3783	4970	4245	3996	3233	2967	3878	4187	4465	4499	3752	3191	4004	4996	5081	5128	1283	1953	4022	3100	4565	2874	5898	3521	2568	4175	3726	4610	3080	3909	3541	3813	3621	3700	3549	1361	1589	4519	3527	3102
YDR170W-A	6	6	6	20	9	13	3	9	8	0	0	0	11	11	6	0	0	0	0	0	1	17	18	20	0	0	0	5	8	5	8	4	6	5	7	7	1	3	5	5	8	8	0	0	0	8	9	11
YDR171W	178	181	189	202	345	348	50	84	108	91	115	103	97	306	119	72	81	109	204	111	153	189	189	206	53	106	175	24	239	24	173	48	72	86	47	60	66	58	66	428	319	347	426	121	111	511	542	828
YDR172W	5311	4825	5120	6111	5337	5593	4466	4173	5046	5400	4802	4368	4595	4070	5042	5450	5640	5262	4361	5634	5911	6038	6314	6343	2108	3195	6534	4653	6300	5188	9444	4776	3746	5986	5253	6927	4513	4934	4912	5107	4460	4767	4619	1886	2011	6816	5598	5152
YDR173C	55	53	52	87	77	88	45	52	54	45	44	43	54	44	53	43	40	39	64	31	46	127	117	114	18	25	35	27	56	35	69	47	44	43	45	55	30	48	43	61	63	50	50	25	26	67	79	58
YDR174W	1383	1289	1298	1427	1325	1400	1307	1134	1508	1204	1178	1048	1527	1379	1479	1220	1180	975	1143	1324	1325	1924	1834	1993	453	619	1339	1135	1732	1247	2250	1516	1105	1410	1351	1665	1331	1174	1248	1469	1370	1310	1290	485	602	1662	1735	1222
YDR175C	430	381	358	243	239	246	206	215	263	340	361	322	228	198	229	376	326	275	778	359	423	462	407	361	175	225	371	194	781	253	920	459	461	380	441	521	394	368	383	535	525	457	557	249	264	666	555	542
YDR176W	356	317	333	554	428	466	280	247	325	405	390	363	287	242	306	427	465	428	317	281	340	444	416	409	131	190	397	237	439	261	591	314	267	336	308	434	298	312	311	323	300	313	315	124	114	394	305	257
YDR177W	517	520	522	392	401	460	405	425	505	596	589	578	368	423	404	490	485	411	634	530	556	707	554	600	237	334	599	493	995	496	833	716	665	586	577	704	541	518	564	420	546	514	518	184	199	540	528	570
YDR178W	189	200	192	203	181	199	138	136	195	149	127	125	121	136	151	95	120	70	95	131	161	278	244	267	79	123	172	81	403	87	325	299	256	191	229	278	201	251	219	251	236	293	382	160	181	250	221	231
YDR179C	48	43	47	52	39	47	25	26	32	67	72	61	28	32	40	62	50	52	49	32	38	132	79	90	12	22	59	31	58	41	57	56	50	41	41	51	46	41	34	32	51	47	50	12	22	32	37	40
YDR179W-A	201	195	194	225	171	201	159	166	177	243	234	230	175	180	169	228	250	182	188	177	169	457	372	382	88	132	228	161	266	134	228	227	177	164	161	216	142	170	165	191	199	188	177	60	97	186	167	196
YDR180W	725	687	716	809	729	807	563	634	735	802	700	688	710	596	746	671	773	690	681	670	777	1086	1048	1060	245	353	762	767	981	688	1114	811	532	794	734	893	617	732	688	706	657	699	599	223	259	712	663	713
YDR181C	241	228	238	229	188	237	198	181	221	336	335	311	212	168	213	279	294	256	207	194	234	412	361	386	83	118	260	163	353	184	323	257	177	219	230	315	219	206	227	252	219	233	222	86	91	256	237	221
YDR182W	509	476	479	653	556	636	433	429	469	585	528	465	404	412	415	465	498	448	504	415	434	715	611	609	172	315	509	413	724	401	837	475	468	549	486	637	431	485	496	456	490	473	511	214	228	511	495	490
YDR182W-A	48	42	45	53	50	49	50	39	42	52	31	39	46	32	43	42	43	46	43	36	39	78	67	70	16	30	41	46	56	42	61	49	46	41	41	57	50	44	42	39	52	44	56	18	17	46	47	56
YDR183C-A	74	75	77	60	47	48	58	66	72	74	82	58	50	64	62	109	76	56	61	69	76	110	114	147	46	51	85	87	111	83	116	111	61	66	73	97	60	82	84	71	56	106	52	24	34	89	94	79
YDR183W	117	112	112	118	90	114	70	70	101	157	131	142	87	97	91	106	115	76	97	98	119	184	159	186	41	63	108	97	188	75	173	135	117	96	130	148	117	105	125	135	118	115	141	50	44	132	133	122
YDR184C	545	524	530	406	314	378	467	480	489	548	594	508	461	432	460	508	512	427	475	504	488	955	872	942	248	335	547	654	834	551	794	588	458	619	557	780	573	520	553	498	572	557	452	175	211	519	566	608
YDR185C	33	31	33	32	21	49	29	29	27	37	45	37	20	25	31	35	29	37	21	26	18	54	53	61	7	10	12	24	46	22	47	34	35	20	25	36	33	35	35	28	34	39	75	23	22	38	34	40
YDR186C	794	720	762	902	710	721	593	613	734	973	875	801	694	604	722	876	917	877	656	467	619	1347	1297	1289	285	383	710	644	918	646	1105	649	726	727	654	867	612	744	666	850	783	775	725	316	334	926	876	943
YDR187C	0	0	0	0	0	1	0	0	0	0	0	0	0	1	0	0	0	1	0	0	0	0	1	2	0	0	0	0	0	1	1	0	0	0	1	0	0	0	0	1	0	0	0	0	0	0	0	1
YDR188W	1907	1680	1788	2263	2136	1985	1352	1350	1782	2759	1725	1978	1602	1581	1549	2745	2567	2477	1295	1452	1638	1537	1966	2043	704	873	1858	1416	1832	1924	3764	1942	1495	1818	1927	2266	1469	1852	1676	1832	1393	1541	1497	502	574	2559	2108	2037
YDR189W	913	854	879	1192	1000	1188	851	833	997	947	843	783	864	786	951	816	807	783	684	754	789	1337	1309	1297	286	398	905	799	1202	821	1339	871	644	964	852	1269	799	946	824	1015	876	800	758	334	344	1044	1004	795
YDR190C	1319	1253	1275	1404	1225	1349	1044	1026	1283	1488	1406	1152	1131	1095	1037	1419	1294	1241	1478	1328	1342	1804	1696	1811	448	625	1245	1159	1983	1093	1950	1415	1265	1336	1325	1826	1190	1305	1426	1343	1336	1257	1143	426	484	1442	1309	1321
YDR191W	57	56	59	66	67	84	47	44	40	65	67	47	39	52	61	44	49	38	62	70	89	120	118	108	26	30	69	54	90	49	82	49	50	40	57	72	41	27	57	58	48	39	65	30	31	44	40	52
YDR192C	191	174	182	225	192	183	147	157	216	178	161	161	179	156	181	192	192	162	160	145	173	352	335	294	66	102	192	134	221	165	290	178	140	193	166	245	148	157	168	198	165	177	191	82	65	212	200	211
YDR193W	0	0	0	0	0	0	0	0	0	0	0	2	0	0	0	0	0	0	0	2	1	0	1	1	0	1	0	0	0	0	0	0	1	0	0	0	0	0	0	0	0	0	0	0	0	0	0	0
YDR194C	3492	3178	3126	2192	1854	1955	1980	2012	2268	3258	3441	2864	2078	1985	2331	3084	3005	2497	5677	3128	3506	3983	3508	3769	1315	1839	3688	2166	5835	1974	6015	3719	3445	3392	3298	4523	3308	3039	3301	4885	4602	4502	3759	1714	1806	5290	4684	4462
YDR194W-A	0	0	0	0	0	0	0	0	0	0	0	1	0	0	0	0	0	0	0	0	0	0	0	0	0	0	0	1	0	0	0	0	0	0	1	0	0	0	0	0	0	0	0	0	0	0	0	0
YDR195W	292	284	275	211	150	212	210	241	289	419	352	291	212	214	209	365	377	314	293	267	287	433	401	406	103	131	275	285	455	292	458	319	253	323	317	363	296	319	285	286	279	276	187	97	89	299	340	281
YDR196C	202	192	198	219	210	220	159	149	164	253	273	250	161	156	131	241	211	201	232	158	207	287	241	303	98	116	220	140	335	118	268	221	229	163	190	240	173	173	207	184	199	172	229	70	97	216	174	211
YDR197W	300	288	284	193	168	208	195	195	212	254	230	236	198	207	172	242	214	203	265	210	223	504	427	507	100	132	294	270	635	252	633	412	352	332	363	468	323	344	368	322	327	320	308	144	122	364	315	319
YDR198C	287	270	286	250	203	231	222	226	254	304	257	224	283	271	297	251	257	252	309	311	343	545	456	531	148	194	371	229	425	246	463	294	240	279	268	382	266	267	279	257	263	235	247	99	111	255	264	298
YDR199W	1	1	1	0	0	1	0	2	0	4	1	0	2	1	0	2	3	1	3	0	0	3	5	0	1	0	0	0	2	4	1	3	1	1	0	0	3	0	1	0	1	0	0	0	0	0	1	2
YDR200C	239	215	223	321	289	310	216	180	254	223	210	157	230	226	246	216	249	197	241	194	241	439	370	415	74	125	209	146	244	148	352	209	192	218	176	282	170	224	187	222	207	202	229	88	75	295	233	226
YDR201W	87	82	83	99	91	93	62	39	61	130	105	129	48	61	50	90	108	95	103	73	73	102	80	110	29	37	74	59	151	55	125	128	93	88	72	108	102	78	90	69	84	93	99	47	51	99	74	75
YDR202C	218	214	205	248	204	246	125	144	166	226	239	212	146	179	161	197	217	155	223	183	183	406	368	380	79	124	206	144	424	115	346	221	214	202	186	289	224	190	232	243	214	206	242	101	98	225	209	206
YDR203W	1	1	1	2	2	0	1	1	1	1	2	0	0	0	0	0	0	0	2	0	2	1	3	1	2	1	5	0	0	0	1	1	0	1	1	2	3	0	1	0	2	0	0	1	0	1	1	0
YDR204W	162	153	147	243	194	218	113	104	117	178	168	147	120	120	117	186	166	126	179	116	162	242	262	268	34	64	143	95	256	125	281	181	135	148	151	188	135	136	137	143	152	141	152	64	70	187	157	110
YDR205W	374	365	382	366	317	378	261	273	317	457	491	477	269	290	357	370	366	340	441	327	357	650	571	563	189	292	497	369	581	359	501	434	341	374	335	456	344	389	392	317	361	338	367	147	196	340	304	362
YDR206W	1100	998	1052	1070	995	978	895	927	1087	1112	993	990	893	818	985	1024	1196	1100	1006	928	1047	1697	1570	1848	420	540	1117	1020	1405	984	1828	1142	911	1207	1068	1400	1084	1097	1000	1031	930	1019	981	357	380	1231	1002	934
YDR207C	254	219	245	310	273	344	220	189	245	305	260	292	236	176	250	299	313	299	197	195	251	215	227	225	79	76	258	197	293	212	430	260	190	267	236	291	214	214	200	280	229	277	225	85	78	337	255	259
YDR208W	994	929	969	1019	955	967	827	831	961	1067	1055	973	930	808	1090	992	1045	951	892	804	917	1527	1448	1470	348	499	1099	766	1398	836	1605	944	768	1074	912	1288	878	1014	981	973	929	950	877	341	388	1139	951	895
YDR209C	1	1	1	0	2	0	1	1	1	0	1	0	0	0	0	1	1	0	1	1	0	1	2	1	0	0	0	1	2	3	2	3	0	0	1	2	1	0	1	1	1	1	5	1	1	1	1	0
YDR210C-C	0	0	0	0	0	0	0	0	0	0	0	0	0	0	0	0	0	0	0	0	0	0	0	0	0	0	0	0	0	0	0	0	0	0	0	0	0	0	0	0	0	0	0	0	0	0	0	0
YDR210C-D	0	0	0	1	0	0	0	0	0	2	1	2	0	0	0	2	1	1	0	0	0	0	0	0	0	0	0	0	0	0	0	0	0	0	0	0	0	0	0	0	0	0	0	0	0	0	1	0
YDR210W	686	688	688	457	367	459	534	576	590	978	868	923	592	683	610	716	705	636	596	658	696	946	827	984	201	272	570	760	1220	976	1083	913	715	731	900	924	682	717	722	534	695	649	932	278	290	548	634	578
YDR210W-A	0	0	0	0	0	0	0	0	0	0	0	0	0	0	0	0	0	0	0	0	0	0	0	0	0	0	0	0	0	0	0	0	0	0	0	0	0	0	0	0	0	0	0	0	0	0	0	0
YDR210W-B	0	0	0	0	0	0	0	0	0	0	0	0	0	0	0	0	0	0	0	0	0	0	0	0	0	0	0	0	0	0	0	0	0	0	0	0	0	0	0	0	0	1	0	0	0	0	0	0
YDR211W	2192	2085	2148	2284	2071	2370	1839	1789	2067	2375	2315	1932	1953	1898	2065	2066	2171	2041	1904	1725	1827	3448	3190	3472	869	1241	2231	2091	3144	1919	3174	2318	1931	2230	2029	2878	1837	2099	2080	2406	2191	2170	1969	831	918	2437	2263	2316
YDR212W	2952	2675	2780	3603	3199	3142	2496	2343	3010	3303	2842	2849	2728	2586	3029	3334	3307	2870	2292	2366	2687	4337	4148	4357	1099	1494	2600	2639	3491	2651	4996	2894	2404	2560	2579	3044	2171	2391	2402	2706	2781	2917	2765	908	1176	3245	2793	2566
YDR213W	334	292	336	446	407	354	300	293	327	414	343	343	349	348	398	408	407	545	321	319	359	313	358	390	105	127	264	276	359	278	509	204	343	278	236	302	211	237	242	364	305	349	286	108	108	429	334	432
YDR214W	1033	976	1021	1406	1452	1319	887	854	1311	1248	1170	1095	1043	787	1143	1209	1193	841	999	753	1168	1902	1866	1801	465	833	1350	717	1124	851	1477	892	563	549	672	934	506	725	672	982	919	877	1013	456	561	1085	945	829
YDR215C	0	0	0	0	0	0	0	0	0	0	0	1	0	0	0	0	0	0	0	0	0	0	0	0	0	0	2	0	0	0	0	0	0	0	0	0	0	0	0	0	0	0	0	0	0	0	0	0
YDR216W	131	121	131	394	352	383	80	87	142	81	58	47	106	147	177	43	63	51	376	133	188	244	231	187	101	193	324	20	103	35	69	42	54	51	35	39	37	53	42	117	131	145	113	47	40	137	142	104
YDR217C	614	563	583	899	769	789	565	586	625	678	544	545	642	531	675	602	654	595	498	431	507	1118	1207	1281	142	238	486	384	658	376	745	419	341	500	459	628	405	468	455	642	609	585	647	250	255	746	616	602
YDR218C	9	9	10	4	5	3	4	1	8	10	14	14	13	6	5	5	4	13	1	9	11	21	25	20	3	6	16	8	12	5	17	5	13	5	4	8	5	4	8	16	14	12	7	5	0	10	15	16
YDR219C	241	225	219	300	292	250	193	196	197	243	273	216	207	171	193	246	282	238	241	198	225	363	337	327	85	148	315	134	336	142	429	226	201	225	193	251	225	212	188	218	209	202	237	93	121	264	214	212
YDR220C	8	8	7	12	7	12	11	3	8	13	10	9	4	8	7	7	11	8	6	7	8	15	9	10	4	4	12	7	9	6	13	9	5	7	7	10	2	13	3	7	6	5	8	2	2	10	11	6
YDR221W	533	521	509	642	628	623	417	424	496	698	640	601	418	429	530	588	650	496	588	522	584	702	669	663	245	380	658	385	754	373	869	543	395	476	474	645	387	467	446	519	502	471	544	243	272	510	483	389
YDR222W	401	408	405	402	376	434	273	289	380	654	767	676	318	336	343	535	561	530	598	467	525	466	414	431	270	442	730	269	557	279	477	391	252	306	295	375	264	311	245	358	394	377	479	174	223	352	349	281
YDR223W	18	17	15	10	7	8	1	7	7	49	34	31	8	8	6	27	30	29	32	22	22	8	10	6	2	3	5	14	43	12	37	21	24	19	21	32	15	24	20	8	7	6	31	6	8	8	8	8
YDR224C	4475	4366	4176	4006	3490	4242	4150	3765	5047	4870	4746	4507	3638	3318	2666	3900	3508	3362	4157	3600	3814	4130	3927	4079	1980	2110	4752	3486	8311	3134	6708	5959	4377	5548	5959	6713	5406	5686	5040	4819	4912	4974	5952	2041	2081	4378	4155	3851
YDR225W	2978	2985	2748	3339	2898	3286	2619	2282	2845	3882	3532	3547	2456	2351	1580	3120	3046	2658	2487	2453	2268	2007	1988	2017	1331	1242	2799	2388	5862	2466	5391	4505	3646	3278	3924	4281	3283	3716	3414	2524	3112	2739	3753	1099	1250	2815	2760	2427
YDR226W	4754	4632	4590	4635	4130	4560	4003	3719	4615	4721	4623	4452	3650	3834	3623	4109	3960	3365	4770	4207	4442	5988	5090	5676	1633	2419	3631	4552	8700	4940	8202	6170	5743	4908	5463	6403	5123	4884	5380	4999	5048	5002	4765	2035	2267	5245	5191	4749
YDR227W	504	474	487	669	570	650	391	391	466	598	576	615	426	378	477	539	560	526	487	411	494	780	717	720	215	340	577	356	655	381	730	470	317	489	441	583	376	482	421	504	507	504	439	144	198	560	461	380
YDR228C	380	352	378	346	334	371	291	299	351	460	468	377	305	270	380	396	470	432	385	311	437	616	517	517	139	209	474	343	513	351	646	361	273	363	358	512	303	333	367	379	326	326	330	147	136	397	360	359
YDR229W	181	171	165	211	179	185	129	146	158	211	157	131	157	136	149	197	203	161	166	143	140	288	324	310	43	64	132	113	257	151	337	171	148	179	183	239	155	187	184	179	147	140	161	62	75	189	210	168
YDR230W	0	0	0	0	0	0	1	0	0	0	0	0	0	1	0	0	0	0	0	2	0	1	0	0	0	0	1	0	0	0	1	0	0	0	0	0	0	0	0	1	0	0	1	0	0	0	0	0
YDR231C	83	83	82	81	91	98	47	40	69	98	106	87	50	68	56	78	88	64	67	53	67	102	80	99	36	64	81	50	170	65	162	85	101	64	75	93	65	62	64	114	110	130	123	35	43	106	124	120
YDR232W	2641	2505	2703	2026	1793	1981	2229	2302	2692	3248	2669	3194	2195	2335	2469	2907	2971	2943	1978	2239	2141	2418	2559	3220	1009	1384	2357	2510	3783	2718	4990	3513	3360	2687	2667	3204	2557	2715	2629	2885	2750	3204	2858	971	1168	3125	2928	3272
YDR233C	5227	5193	5405	3441	3086	4272	7059	6843	8207	6111	6418	6282	4797	4915	5049	4431	4201	4581	3819	3915	4122	6145	5618	5887	1821	2584	4278	5881	9088	5230	6993	6539	5488	5839	5357	7552	5611	5692	5957	5963	6184	6433	4878	1921	1867	5611	5536	5866
YDR234W	1816	1545	1705	1332	1290	1425	2635	2006	2913	1752	1567	1444	1771	1714	1783	1719	1682	1710	689	905	963	1882	1869	2244	389	527	1010	1854	1969	2136	3426	1839	1526	1861	1843	2339	1530	1818	1753	1559	1358	1432	2967	1160	1401	1876	1625	1495
YDR235W	334	321	328	300	304	295	287	252	346	382	408	362	260	257	270	369	370	327	318	280	246	535	454	549	111	166	287	276	562	270	478	330	353	305	296	446	328	300	334	363	328	373	322	146	148	376	358	321
YDR236C	154	151	158	200	143	164	109	101	160	197	150	165	105	138	127	127	134	115	183	138	141	167	150	172	102	117	236	121	282	135	245	207	186	157	159	207	128	165	154	136	176	182	187	72	84	146	136	146
YDR237W	724	679	642	369	343	358	317	336	375	735	765	645	370	346	378	601	617	418	1453	675	803	884	754	870	268	415	718	427	1473	350	1276	945	909	699	652	914	720	669	729	887	960	869	924	382	458	935	852	842
YDR238C	4298	3986	4140	5700	5045	5532	3510	3534	4285	4811	4464	4019	3786	3217	4103	4247	4417	4132	3713	3298	3933	5982	5814	5751	1365	2220	4165	3829	5885	3597	6924	4135	3355	4497	4079	5447	3523	4082	4121	4183	4054	4029	3488	1390	1595	4915	4151	4035
YDR239C	346	322	324	403	365	338	261	307	315	391	361	329	322	313	341	398	357	382	261	246	295	543	511	519	118	156	281	279	433	275	570	367	264	268	306	378	265	305	281	378	351	360	307	119	133	419	336	365
YDR240C	240	216	230	227	188	190	223	166	217	261	250	223	205	192	230	246	240	227	215	191	239	394	375	381	95	116	271	188	313	161	399	197	203	213	240	290	181	181	209	253	242	231	216	99	94	288	248	278
YDR241W	12	11	11	21	14	17	12	8	10	6	5	10	19	7	11	8	3	7	6	6	4	16	11	9	2	6	10	7	16	4	10	9	8	8	8	7	8	3	7	22	29	30	23	4	5	16	34	31
YDR242W	47	50	46	83	103	93	37	66	56	95	80	76	37	51	44	69	74	56	89	70	62	25	37	38	9	24	37	13	36	10	41	24	21	23	23	20	16	10	25	66	65	46	37	11	16	64	78	83
YDR243C	247	218	232	267	243	251	175	158	187	311	235	216	168	163	181	273	299	239	220	224	261	387	361	403	78	125	250	186	303	188	455	237	193	254	230	330	188	208	239	269	202	236	201	64	76	276	222	231
YDR244W	285	277	286	321	257	331	181	210	221	291	234	214	210	195	267	274	262	247	296	300	364	421	403	429	134	161	397	251	539	241	515	331	251	356	338	440	275	329	310	248	226	214	254	128	94	241	239	264
YDR245W	1505	1455	1463	1220	1048	1212	1193	1159	1389	1960	1909	1734	1281	1174	1154	1720	1614	1525	1324	1224	1290	2129	1830	2021	631	767	1524	1362	2511	1288	2254	1958	1671	1590	1551	2025	1441	1415	1498	1430	1633	1608	1496	553	629	1548	1485	1376
YDR246W	128	117	124	136	106	159	85	72	131	160	119	126	99	101	112	134	135	104	106	116	134	155	199	171	53	59	110	110	175	109	219	121	100	142	139	160	138	132	130	151	126	124	83	32	30	142	129	157
YDR246W-A	5	5	5	3	8	6	3	4	9	9	1	6	6	5	7	4	6	5	5	2	3	10	7	1	2	2	5	4	4	4	4	5	1	8	2	8	6	5	2	3	8	6	3	2	1	12	7	4
YDR247W	145	146	145	224	208	198	105	142	149	172	164	191	128	150	120	144	173	155	111	106	130	98	99	128	66	75	158	72	299	82	309	143	117	143	129	173	119	149	134	169	174	182	161	40	57	158	136	207
YDR248C	109	104	107	169	133	145	83	105	105	152	131	146	63	104	55	126	107	103	150	75	100	285	223	264	35	60	76	45	176	51	126	81	126	64	68	87	83	78	86	92	106	99	76	27	27	85	92	132
YDR249C	141	134	134	112	96	122	125	142	142	164	112	121	115	126	113	121	111	125	122	100	119	197	209	172	78	77	148	148	278	144	223	163	138	150	130	175	131	151	141	145	151	134	121	45	38	170	124	183
YDR250C	1	1	1	1	0	0	0	1	0	1	0	3	1	0	1	0	0	2	0	1	0	3	0	3	0	0	0	0	0	2	2	2	0	1	2	1	0	0	1	0	1	0	1	0	0	0	1	0
YDR251W	587	548	577	727	637	826	509	520	638	656	633	594	543	530	573	524	589	540	626	470	588	803	789	788	188	306	637	424	861	431	1047	551	526	510	520	660	437	464	509	578	570	551	601	231	297	629	554	501
YDR252W	34	33	33	42	31	28	32	30	36	41	37	36	37	28	33	34	32	26	29	27	28	55	43	47	8	18	45	30	56	30	41	39	34	25	38	44	22	33	40	32	38	30	53	12	13	30	35	28
YDR253C	14	14	16	11	13	20	20	19	21	24	13	13	15	18	26	18	13	12	23	19	22	15	18	20	4	9	25	8	14	9	17	12	13	8	8	9	6	18	17	13	16	15	15	4	5	14	18	11
YDR254W	86	80	78	129	112	103	107	62	96	112	98	80	89	64	80	89	108	71	112	65	91	113	103	96	33	51	114	36	108	37	114	81	77	49	86	89	60	77	67	81	74	60	87	34	50	72	78	63
YDR255C	83	79	76	104	101	100	47	45	49	81	68	80	64	74	60	75	69	49	117	62	86	152	197	163	26	57	108	48	133	63	148	89	78	67	60	82	64	80	73	85	65	70	76	31	31	98	52	55
YDR256C	40	41	41	27	26	36	31	28	34	39	54	37	30	38	23	43	55	47	42	32	31	59	78	70	36	42	59	35	71	43	78	34	19	47	45	60	32	31	51	35	34	39	31	9	17	41	41	42
YDR257C	583	563	560	569	480	448	452	441	527	665	611	549	471	452	479	642	733	578	526	545	648	898	847	924	244	404	667	476	853	494	968	659	450	568	602	833	566	590	592	536	499	507	449	175	190	710	547	510
YDR258C	234	226	216	574	612	679	133	112	164	231	222	201	161	174	184	213	248	137	423	212	360	665	609	581	46	123	189	54	250	80	208	119	57	66	75	106	64	75	69	197	257	181	230	85	84	247	211	167
YDR259C	201	188	195	43	46	39	210	213	288	207	212	182	167	132	206	200	203	152	205	190	235	341	306	333	106	127	294	166	359	157	453	214	180	249	257	280	202	254	219	125	120	128	187	66	71	148	122	166
YDR260C	57	53	62	81	59	98	50	71	82	64	51	61	53	71	81	55	46	42	45	40	36	93	87	106	19	39	62	24	52	37	53	44	30	38	32	45	36	39	39	81	72	66	83	19	40	87	79	98
YDR261C	655	609	637	871	729	848	737	692	833	770	777	708	722	623	667	644	652	671	545	396	471	941	813	864	229	380	601	456	773	445	775	596	504	528	507	653	477	523	493	716	696	694	682	274	307	726	702	789
YDR261C-C	0	0	0	0	0	0	0	0	0	0	0	0	0	0	0	0	0	0	0	0	0	0	0	0	0	0	0	0	0	0	0	0	0	0	0	0	0	0	0	0	0	0	0	0	0	0	0	0
YDR261C-D	1	2	2	22	29	24	0	0	0	0	0	0	0	0	0	0	0	0	0	0	0	0	0	0	0	0	0	0	0	0	0	0	0	0	0	0	0	0	0	0	0	0	0	0	0	0	0	0
YDR261W-A	0	0	0	0	0	0	0	0	0	0	0	0	0	0	0	0	0	0	0	0	0	0	0	0	0	0	0	0	0	0	0	0	0	0	0	0	0	0	0	0	0	0	0	0	0	0	0	0
YDR261W-B	2	1	2	13	5	7	5	3	15	0	0	0	0	0	0	0	0	0	0	0	0	0	0	0	0	0	0	0	0	0	0	0	0	0	0	0	0	0	0	0	0	0	13	1	1	0	0	0
YDR262W	122	111	113	236	224	238	161	160	187	109	97	87	119	126	114	111	110	77	101	92	81	193	193	188	49	62	112	56	103	56	152	68	74	67	61	79	76	54	69	114	129	128	127	41	66	155	141	139
YDR263C	41	39	41	95	90	111	45	53	61	25	28	33	53	36	52	26	33	16	29	22	26	67	57	48	9	14	24	8	23	18	37	12	19	27	20	21	17	25	23	69	80	73	23	10	15	83	79	73
YDR264C	829	774	803	1478	1163	1410	599	637	791	865	813	838	704	698	740	697	712	639	790	594	678	1273	1191	1106	414	613	924	648	1135	640	1123	827	680	684	609	909	596	692	708	851	842	806	802	310	416	913	768	766
YDR265W	97	90	87	141	131	126	83	63	90	102	95	65	79	82	73	70	95	77	142	80	115	189	147	153	32	57	98	52	124	55	150	73	94	58	88	108	72	92	65	86	85	67	84	45	28	114	100	93
YDR266C	992	907	961	1014	882	993	834	854	1072	983	945	826	935	876	990	904	952	989	829	876	985	1540	1499	1501	329	474	963	1025	1319	980	1636	954	721	1043	900	1308	883	961	944	975	844	896	826	319	383	1118	944	871
YDR267C	261	244	244	244	214	229	205	212	244	388	268	239	223	200	177	266	244	256	210	204	199	363	314	352	49	87	129	214	414	217	430	341	292	288	239	399	221	320	306	274	236	234	267	100	98	270	268	283
YDR268W	160	144	142	188	136	128	107	105	104	178	171	111	93	96	92	157	129	100	201	136	164	244	237	227	95	78	198	105	257	85	262	137	132	137	136	185	120	118	126	168	171	200	158	77	79	188	178	204
YDR269C	0	0	0	0	0	0	0	0	0	0	1	0	0	0	0	0	0	0	0	1	0	0	1	1	0	0	0	0	0	0	0	0	0	0	1	0	0	0	0	0	0	0	0	0	0	0	0	0
YDR270W	469	485	401	359	311	282	231	346	396	627	458	441	201	148	155	411	515	318	425	162	235	1067	1034	937	110	161	324	401	854	423	1004	718	276	367	577	767	281	599	565	545	609	566	293	121	161	720	662	163
YDR271C	0	0	0	1	0	1	0	0	0	0	0	0	1	0	0	0	0	0	0	0	1	1	2	3	0	0	0	0	0	0	0	1	1	0	0	0	0	0	0	0	0	0	2	0	0	0	0	1
YDR272W	197	185	200	366	318	392	116	107	169	229	227	225	98	110	90	205	207	151	250	204	206	436	335	391	111	154	300	131	292	114	252	191	191	153	150	234	150	150	178	119	135	116	227	65	82	115	130	162
YDR273W	14	15	15	17	20	20	8	9	8	20	15	9	12	6	10	13	25	16	11	10	12	20	24	33	4	11	31	6	17	8	21	16	17	18	23	14	11	14	14	11	6	11	24	12	6	12	12	13
YDR274C	1	1	0	0	0	0	0	0	0	1	3	0	0	0	0	1	1	1	2	0	0	1	2	0	0	0	1	0	0	0	1	1	0	0	0	0	1	0	0	0	1	0	1	1	0	1	1	0
YDR275W	113	110	112	121	115	135	88	77	107	159	180	145	82	91	67	151	161	156	107	82	90	133	123	155	45	71	120	42	184	51	135	106	120	106	97	119	96	88	89	105	109	112	218	67	52	108	97	163
YDR276C	1389	1378	1344	1179	1077	1186	1072	1150	1449	1704	1522	1578	956	1104	1002	1304	1308	1118	1685	1440	1440	1749	1243	1563	563	819	1194	1334	2647	1378	2027	2067	1584	1607	1602	1893	1579	1516	1600	1191	1368	1344	1559	546	691	1332	1257	1144
YDR277C	45	32	37	83	53	38	60	30	42	49	30	35	40	27	36	52	37	28	21	10	14	42	58	43	13	26	20	9	29	18	111	59	57	37	19	55	40	31	44	49	38	39	31	4	10	44	35	77
YDR278C	1	1	2	0	1	0	0	0	0	4	7	9	1	0	1	2	4	2	1	2	0	3	3	5	0	0	0	1	1	1	1	1	1	2	0	3	2	0	0	0	0	0	1	0	0	1	1	1
YDR279W	300	279	288	334	261	314	292	282	344	248	217	210	299	253	288	230	224	201	285	263	281	497	468	483	102	167	295	259	456	199	429	273	239	286	279	389	250	261	303	341	336	291	291	109	141	356	339	336
YDR280W	622	599	623	480	416	438	470	511	584	863	834	720	482	471	469	785	721	657	577	540	608	965	802	1003	234	335	628	549	914	538	901	711	609	623	612	859	592	605	683	565	671	664	552	222	230	693	627	661
YDR281C	30	29	30	176	142	169	18	22	20	23	15	20	20	19	12	12	16	15	11	17	12	13	11	12	0	1	3	22	39	15	42	40	21	21	33	46	11	38	40	23	20	35	20	4	6	38	23	27
YDR282C	105	97	95	95	106	128	61	62	73	111	105	113	84	105	68	112	95	91	173	106	124	180	174	182	32	61	85	40	157	53	143	94	92	76	77	75	85	64	73	116	91	99	139	55	62	134	99	105
YDR283C	772	722	730	1182	1047	1133	585	612	705	995	896	828	693	598	764	944	1081	880	805	628	687	1183	1118	1180	294	423	921	468	916	421	1065	659	452	619	589	796	536	619	575	688	657	657	709	278	317	813	704	634
YDR284C	510	481	490	490	445	519	365	364	419	556	582	497	348	401	393	437	458	367	1184	782	800	801	691	779	284	442	576	398	782	347	636	539	523	395	377	611	425	392	497	339	382	369	648	243	306	341	328	342
YDR285W	78	77	81	126	113	129	54	50	62	80	89	90	66	64	61	82	81	70	82	89	86	200	155	205	14	47	78	48	102	34	89	59	58	51	50	78	64	67	58	68	79	91	65	31	28	83	84	87
YDR286C	80	79	69	84	65	51	50	56	56	131	101	98	46	50	44	104	98	68	123	80	83	103	101	90	17	30	49	41	159	43	121	90	106	64	92	99	83	70	76	72	84	75	88	30	41	67	73	63
YDR287W	92	82	82	139	150	133	111	131	133	81	49	46	63	53	62	66	63	46	103	81	86	140	116	151	35	54	73	37	106	44	135	69	64	47	68	66	47	47	61	118	100	107	85	32	35	169	109	117
YDR288W	212	214	205	191	205	212	159	178	194	251	215	196	192	206	179	190	186	157	203	194	214	424	367	415	87	133	195	167	326	145	266	244	206	186	234	254	192	197	220	197	242	202	255	83	75	216	207	205
YDR289C	204	192	193	210	186	187	173	163	183	176	193	158	168	161	162	185	187	143	186	164	186	380	357	348	96	105	267	164	300	183	310	176	185	206	213	237	153	180	193	219	206	184	184	59	71	250	223	207
YDR290W	0	0	0	0	0	0	0	0	0	0	0	0	0	0	0	0	0	0	1	0	0	0	0	0	0	0	0	0	0	0	0	0	0	0	0	0	0	0	0	0	0	0	0	0	0	0	0	0
YDR291W	469	437	448	537	470	471	314	309	368	552	493	434	317	309	375	544	475	478	470	412	478	776	776	854	193	294	571	340	575	343	805	449	378	444	435	536	384	495	438	475	440	425	374	155	184	503	469	392
YDR292C	1380	1325	1355	1301	1102	1350	979	1031	1167	1688	1523	1393	974	946	1033	1383	1501	1405	1199	1123	1235	1915	1685	1781	545	818	1424	1522	2381	1333	2346	1718	1516	1663	1580	2174	1448	1574	1599	1244	1185	1167	1180	482	556	1311	1233	1193
YDR293C	2242	2044	2193	2460	2267	2489	2051	2234	2679	2231	1935	1940	2354	2248	2726	1863	1935	1871	1951	1694	2054	3730	3716	3607	785	1121	2469	1890	2871	1762	3419	1867	1534	2152	1782	2425	1717	1949	1842	2505	2202	2249	1829	661	851	2691	2183	2403
YDR294C	764	733	721	1133	1074	1048	587	583	760	872	771	710	639	562	598	718	807	670	668	570	685	1365	1383	1368	241	441	639	495	1062	562	1266	734	537	578	617	793	553	643	664	717	724	716	809	290	389	821	741	677
YDR295C	285	270	269	337	311	321	237	260	278	288	314	276	227	195	233	332	340	281	238	231	239	426	417	397	102	165	304	212	393	233	498	234	202	266	270	341	233	249	259	316	270	271	209	95	102	348	305	296
YDR296W	363	324	321	298	261	251	181	168	221	408	380	367	206	212	188	374	321	244	601	292	414	347	330	313	119	162	316	152	584	168	664	394	407	298	336	419	314	282	320	510	462	415	387	161	186	591	517	584
YDR297W	621	548	632	827	739	895	544	488	595	911	694	696	548	473	437	718	686	786	480	455	548	442	457	517	313	403	682	520	757	571	1005	639	872	509	480	644	504	502	520	684	586	644	612	225	256	703	635	824
YDR298C	1134	1206	1074	831	760	761	626	628	779	1228	1032	988	713	674	721	919	975	756	538	1018	1243	1461	1268	1232	531	760	1265	798	2963	708	2663	2151	1569	1595	1696	1953	1506	1549	1547	877	997	977	1663	677	768	1055	941	843
YDR299W	705	648	650	871	719	771	802	728	866	1028	916	755	692	578	635	972	954	944	373	398	402	642	630	668	174	236	457	528	676	446	802	627	397	601	559	783	495	579	578	927	875	923	719	307	327	954	945	803
YDR300C	873	812	829	934	778	844	725	712	856	850	847	719	753	736	736	811	750	701	965	674	708	1262	1074	1151	329	478	805	882	1424	839	1419	915	949	881	871	1244	852	890	899	850	893	740	673	271	339	905	867	902
YDR301W	750	679	712	1081	966	973	514	563	717	917	748	811	615	569	673	800	958	809	702	624	703	1059	981	988	253	408	757	554	877	600	1220	636	554	696	592	876	539	621	639	639	697	731	758	277	293	900	669	555
YDR302W	244	235	231	246	202	227	179	182	222	286	302	266	200	198	171	245	254	203	271	214	202	329	266	310	110	128	226	182	361	197	363	348	279	194	244	318	249	202	228	235	267	253	337	110	122	239	244	245
YDR303C	955	863	892	1203	996	1173	825	767	912	1084	1104	970	717	702	831	995	1019	944	869	656	780	1130	991	1029	447	562	1145	809	1308	778	1527	928	688	969	885	1157	768	976	826	961	843	1038	943	335	403	1071	874	707
YDR304C	1162	1101	1129	1438	1252	1444	775	792	911	1305	1144	1149	904	930	857	1010	1037	884	1070	871	951	2064	1725	1906	319	566	853	909	1788	947	1727	1262	1232	1025	1108	1487	1049	1070	1228	1146	1296	1241	1492	475	591	1199	1192	1251
YDR305C	168	166	170	163	128	191	119	118	146	209	236	192	129	145	129	164	170	159	176	126	158	319	286	330	61	82	158	125	260	113	249	203	185	173	176	198	157	152	150	153	152	202	170	71	72	151	178	166
YDR306C	207	200	198	221	180	183	145	155	195	255	255	227	169	189	182	226	206	175	256	183	225	322	270	313	87	131	220	185	323	172	314	208	231	190	200	225	164	202	170	164	212	180	235	95	92	170	197	186
YDR307W	417	397	415	440	368	490	319	315	380	588	546	509	359	319	353	419	412	421	376	272	354	759	653	694	161	293	543	326	584	276	528	464	364	375	320	477	318	420	361	415	448	426	436	170	242	443	369	342
YDR308C	211	203	209	175	152	195	158	174	196	274	264	262	161	152	154	233	233	228	178	172	174	304	273	279	63	102	162	165	348	162	348	240	250	172	209	294	229	200	213	198	243	234	299	69	101	215	208	229
YDR309C	214	191	204	298	218	273	164	143	180	304	257	267	185	166	205	247	236	222	140	123	165	306	284	280	61	118	184	189	241	183	351	186	159	173	201	237	135	183	179	249	211	203	176	78	80	232	225	244
YDR310C	1038	919	962	1150	1027	993	883	819	1036	1301	1120	1047	944	800	1015	1268	1243	1251	851	794	947	1275	1501	1472	285	374	831	880	1194	887	1779	891	749	1038	912	1274	866	953	909	957	901	907	885	321	327	1215	933	788
YDR311W	498	467	479	469	399	413	395	412	473	584	548	447	433	458	437	500	506	434	570	489	518	772	668	751	234	316	617	438	772	454	736	496	476	441	424	597	480	470	455	479	407	455	463	195	219	476	448	433
YDR312W	552	505	520	407	326	381	407	414	429	605	552	438	484	426	447	550	519	476	445	415	420	943	776	918	230	294	496	440	775	395	707	550	530	557	489	718	487	522	530	634	656	637	704	266	282	682	597	696
YDR313C	136	139	126	129	145	147	85	93	109	190	177	144	90	106	87	157	170	145	208	148	146	206	228	216	57	94	141	76	248	82	211	143	133	101	141	149	112	115	106	106	90	117	164	60	80	149	124	91
YDR314C	194	164	169	258	259	188	130	118	153	240	202	205	149	121	177	266	289	212	164	134	169	343	284	302	55	84	172	111	179	122	343	141	133	186	129	191	144	146	117	155	166	168	175	49	67	193	152	155
YDR315C	54	51	55	63	56	48	36	49	45	63	71	63	51	42	52	51	47	55	85	61	57	125	93	125	12	31	56	34	66	35	46	49	36	27	45	60	36	26	41	65	60	58	66	13	28	48	56	73
YDR316W	327	320	299	179	162	160	146	210	183	316	297	273	160	215	185	279	323	197	464	209	258	482	422	474	126	134	301	191	597	152	542	423	361	295	297	422	286	309	322	523	557	480	358	132	175	565	517	548
YDR316W-A	0	0	0	0	0	0	0	0	0	0	0	0	0	0	0	0	0	0	0	0	0	0	0	0	0	0	0	0	0	0	0	0	0	0	0	0	0	0	0	0	0	0	0	0	0	0	0	0
YDR316W-B	0	0	0	0	0	0	0	0	0	0	0	0	0	0	0	0	0	0	0	0	0	0	0	0	0	0	0	0	0	0	0	0	0	0	0	0	0	0	0	0	0	0	0	0	0	0	0	0
YDR317W	6	5	4	24	16	16	2	1	1	15	14	17	1	0	0	20	16	6	0	2	1	4	2	4	1	0	0	3	11	3	9	4	5	5	9	7	2	3	5	2	0	2	1	1	0	3	0	0
YDR318W	97	96	93	109	96	99	73	68	109	132	129	108	73	72	64	101	85	73	77	60	61	151	137	162	28	37	76	79	181	78	146	127	120	90	88	144	84	107	71	87	109	94	129	42	47	97	95	91
YDR319C	147	148	145	123	116	141	118	119	152	240	185	196	99	108	96	145	175	115	134	114	111	251	227	225	62	72	152	110	266	105	226	194	159	154	163	182	121	146	167	131	147	166	151	52	70	136	135	145
YDR320C	409	362	379	418	339	357	298	274	363	449	389	342	340	270	367	462	476	370	329	374	434	567	588	575	166	243	486	384	519	388	812	420	274	444	384	548	363	380	396	373	308	303	318	115	135	419	344	351
YDR320C-A	177	176	175	198	171	220	158	128	169	273	241	265	132	135	106	187	173	164	152	151	168	233	182	236	68	82	164	104	294	142	244	264	198	190	224	233	171	185	167	164	182	177	203	63	46	174	168	164
YDR320W-B	4	5	3	5	11	4	3	0	4	6	10	5	7	4	2	6	5	6	4	2	1	2	4	0	1	3	2	2	7	0	4	5	4	2	5	3	5	3	3	3	5	2	6	5	0	2	0	7
YDR321W	2294	2220	2284	2079	1750	2192	2103	2072	2490	2308	2107	2065	2049	2037	2015	1839	1871	1847	1599	2046	1958	2962	2901	3071	819	1099	1961	2779	3928	2553	3934	3088	2832	2575	2681	3167	2472	2499	2626	2161	2294	2401	2497	749	803	2241	2176	2272
YDR322C-A	217	227	209	129	149	152	121	113	133	292	171	209	120	135	124	232	193	147	112	234	205	297	263	292	63	91	169	140	456	123	457	411	367	270	304	352	254	294	296	187	244	232	384	91	103	199	263	227
YDR322W	601	557	535	370	328	342	331	357	383	545	553	498	370	329	322	505	512	352	1170	514	607	724	635	672	245	340	600	280	1181	281	985	712	716	587	571	770	619	517	582	739	741	705	726	325	360	822	740	842
YDR323C	92	88	95	96	81	106	79	76	92	118	110	104	74	83	68	113	101	95	105	72	83	132	123	132	44	67	139	61	140	63	120	100	109	85	72	104	83	75	105	80	79	82	107	53	44	85	86	103
YDR324C	2219	2054	2138	1683	1414	1575	1878	1938	2102	2734	2347	1973	2091	1771	2089	2729	2739	2946	1694	2016	1983	3135	3078	3199	865	1195	2233	1880	2735	1850	3515	2240	1659	2508	2144	3180	2052	2272	2201	2162	1956	1983	1902	726	833	2456	2240	2265
YDR325W	607	595	581	743	669	705	498	507	597	743	749	663	548	448	602	648	687	610	599	448	509	1142	1035	1016	200	361	618	473	836	468	760	604	435	602	629	702	505	593	511	529	580	569	495	228	245	619	545	471
YDR326C	1746	1674	1753	1989	1632	2024	1360	1418	1695	2011	1932	1915	1492	1368	1590	1368	1538	1712	1814	1495	1592	2850	2631	2789	687	1008	1854	1605	2613	1325	2044	2075	1625	1835	1603	2194	1626	1721	1734	1857	1810	1899	1855	584	787	1802	1675	1557
YDR327W	0	0	1	0	0	2	0	0	0	0	0	0	0	0	1	2	0	0	1	0	1	3	1	1	0	0	2	0	0	0	0	1	0	1	0	2	0	1	0	0	0	0	0	0	0	0	0	1
YDR328C	743	694	743	867	759	861	622	569	741	857	705	813	627	693	595	743	619	605	788	588	711	859	846	1068	296	437	628	561	1115	602	1123	902	791	649	665	969	637	645	731	800	690	812	857	318	382	857	864	831
YDR329C	300	277	280	362	317	361	229	207	290	325	317	265	258	302	277	295	291	204	315	204	253	586	509	564	90	160	267	224	387	171	432	266	245	242	219	354	235	253	295	302	309	283	299	122	133	302	285	244
YDR330W	210	189	208	283	254	268	170	171	215	216	190	177	174	163	228	185	213	191	225	174	228	408	388	416	74	107	204	119	238	152	349	157	153	174	146	252	146	159	199	190	209	180	163	60	89	275	201	174
YDR331W	575	553	568	594	495	682	465	534	572	679	702	615	485	530	488	509	525	467	538	427	434	726	681	754	196	288	548	620	933	550	940	652	627	612	592	766	536	606	590	600	586	603	570	207	264	548	539	557
YDR332W	197	188	180	188	177	179	154	160	177	244	217	192	133	145	155	247	253	227	182	187	164	414	356	359	78	104	225	111	269	122	311	187	141	198	196	219	159	173	158	143	150	144	176	69	78	218	177	154
YDR333C	644	595	618	677	690	635	510	464	597	648	592	536	501	432	599	628	694	541	636	543	662	1034	937	974	255	414	727	564	899	573	1056	570	507	649	604	808	564	595	591	603	585	581	642	279	336	696	632	600
YDR334W	1227	1144	1189	1486	1302	1352	1018	968	1242	1311	1174	1072	936	915	1195	1267	1346	1156	1188	926	1225	1822	1782	1800	403	665	1393	901	1498	909	1923	1252	893	1198	1128	1508	1005	1216	1081	1281	1195	1347	1129	417	558	1542	1370	1104
YDR335W	807	731	721	1128	939	913	616	636	774	954	754	686	700	646	713	823	921	771	792	620	727	1198	1098	1053	259	419	760	558	902	584	1317	864	609	656	725	967	622	763	684	736	707	678	819	253	301	926	725	599
YDR336W	168	166	167	144	129	172	116	129	163	162	165	162	114	117	104	137	141	109	160	167	172	313	246	267	48	72	95	102	259	99	228	193	151	129	152	188	140	137	152	250	281	296	201	60	78	269	249	293
YDR337W	441	425	410	301	221	264	203	198	291	438	403	407	209	233	244	432	388	285	757	385	511	466	409	424	175	261	379	226	945	202	838	579	557	440	441	607	417	387	465	568	625	563	502	301	298	638	594	656
YDR338C	236	221	225	267	219	254	180	171	208	302	276	261	207	167	183	273	258	263	233	196	231	398	373	396	63	143	192	163	352	152	353	226	206	219	217	266	181	199	208	202	236	206	252	85	128	251	204	223
YDR339C	560	540	559	467	374	429	575	548	608	674	611	601	540	569	481	550	559	524	474	459	450	842	776	869	262	319	571	447	751	428	747	606	552	475	602	745	533	484	553	592	663	645	565	200	249	662	586	681
YDR340W	1	0	1	0	0	0	0	0	0	4	5	8	0	0	0	5	1	4	0	0	0	0	0	0	0	0	0	0	0	0	0	0	0	0	0	0	0	0	0	0	0	0	0	0	0	0	0	0
YDR341C	5126	4962	5005	4957	4330	5219	4106	4265	4838	5537	5045	4402	4063	4127	3985	4835	4963	4587	4262	4978	4937	7824	7020	7236	1924	2593	4849	5198	7718	5263	8311	6145	5011	5623	5493	7073	5107	5500	5428	4935	4887	4815	4901	2019	2111	5300	5351	5327
YDR342C	99	106	134	49	26	32	65	101	75	88	76	83	0	3	1	52	54	38	119	171	205	32	18	26	20	10	31	26	278	29	765	640	1159	110	97	157	147	105	171	2	1	0	10	4	3	3	1	2
YDR343C	47	41	40	15	5	10	9	6	8	13	5	3	319	407	431	4	7	6	1	0	0	11	14	6	7	4	9	5	12	6	5	4	7	2	3	6	3	2	3	8	11	8	294	125	82	6	7	9
YDR344C	17	16	18	20	10	21	12	7	15	27	30	33	17	15	14	20	21	21	19	20	17	42	49	42	5	8	17	2	18	6	25	4	17	12	6	16	12	14	14	11	15	13	21	8	14	15	19	11
YDR345C	7364	6686	7873	6589	5316	5613	6626	5419	6069	10514	9989	8718	5786	5533	5890	7803	7277	9395	10396	8623	8300	6668	6363	7478	2674	2925	4534	5589	9605	5031	8806	7652	14823	7352	6296	10249	7716	6985	8672	8397	8992	8133	6595	2394	2685	8955	6922	12511
YDR346C	2330	2249	2266	2188	1877	2085	1931	1995	2062	2689	2699	2234	2046	1944	2002	2283	2429	2257	2122	2181	2065	3100	2611	3296	927	1317	2256	2482	3648	2278	3542	2815	2227	2548	2359	3257	2227	2494	2621	2228	2100	2190	2201	957	977	2439	2308	2180
YDR347W	744	650	626	475	407	398	350	317	415	790	667	570	416	343	405	692	661	543	1497	681	811	830	819	754	277	356	735	326	1229	345	1432	783	785	662	779	872	686	629	645	902	794	861	771	307	346	1061	984	898
YDR348C	535	476	497	682	543	560	411	416	542	623	543	512	458	356	464	651	588	576	402	438	496	693	732	663	197	280	511	446	668	457	868	487	382	572	467	673	429	456	459	508	485	427	454	190	210	629	490	516
YDR349C	998	957	989	843	756	850	691	812	893	1331	1207	1147	775	796	794	993	1059	1057	1095	900	980	1777	1569	1613	385	579	919	896	1459	876	1364	1134	920	948	895	1277	888	926	1016	972	948	969	983	372	466	1023	949	1064
YDR350C	303	289	291	329	283	306	195	236	269	385	402	315	215	205	234	324	302	278	297	271	286	622	518	533	131	166	371	222	460	213	416	292	284	263	256	327	245	284	269	295	247	270	276	125	128	332	285	287
YDR351W	578	505	533	611	524	549	478	427	556	673	609	540	549	495	569	574	618	593	612	424	480	837	879	919	249	332	602	458	653	417	965	478	390	496	470	584	487	450	511	539	479	541	460	175	216	680	569	531
YDR352W	390	382	398	316	249	385	397	391	465	464	431	402	304	333	315	296	359	311	342	361	356	609	526	606	194	227	323	400	611	389	571	496	456	411	421	538	433	418	455	333	390	392	435	163	220	346	347	358
YDR353W	2013	1859	1871	3285	3010	3047	1569	1503	2002	2293	1886	1874	1792	1635	1850	2241	2023	1687	1636	1494	1720	2204	2406	2403	490	868	1444	1651	2635	1963	3623	1965	1512	1839	2095	2368	1735	1846	1732	1892	1791	1823	1561	707	763	2384	2025	1876
YDR354C-A	0	0	0	0	2	0	0	0	0	1	0	0	0	0	1	0	0	0	0	0	1	0	0	0	0	0	1	0	1	0	0	0	0	1	0	0	0	0	0	0	0	0	1	0	0	0	0	0
YDR354W	589	561	590	700	624	742	629	613	732	658	578	608	652	610	674	514	528	487	384	378	398	1263	1076	1208	189	305	437	449	656	421	631	514	436	415	432	538	367	422	422	719	760	723	564	206	265	707	720	752
YDR355C	0	0	0	0	0	0	0	0	0	0	0	0	0	0	0	0	0	0	0	0	0	0	0	0	0	0	0	0	0	0	0	0	0	0	0	0	0	0	0	0	0	0	0	0	0	0	0	0
YDR356W	412	375	364	582	536	520	333	306	447	488	438	351	440	289	322	477	508	410	401	330	374	639	614	596	102	198	429	209	381	200	544	359	253	365	344	452	270	372	296	444	403	379	382	138	138	501	409	290
YDR357C	72	67	69	135	95	130	41	55	52	90	88	77	42	47	29	85	76	65	81	61	61	132	113	106	29	39	84	49	119	41	93	54	74	48	47	78	60	63	84	56	58	51	91	34	38	54	59	72
YDR358W	127	122	121	182	172	189	90	99	118	114	139	118	90	114	90	95	120	89	152	92	126	292	238	207	33	64	127	62	222	60	190	97	128	94	95	140	98	95	110	136	114	103	143	61	63	140	114	142
YDR359C	507	443	451	737	616	464	438	412	596	619	555	531	431	412	497	677	744	622	488	412	451	523	530	565	159	222	459	365	552	364	933	399	279	386	336	534	302	347	390	490	461	470	453	150	197	597	501	345
YDR360W	1	0	1	0	0	3	0	0	0	0	0	1	0	0	0	0	0	0	0	0	1	0	5	3	0	0	0	1	0	0	3	0	0	1	0	0	1	0	0	0	0	0	0	0	0	2	0	0
YDR361C	932	883	915	703	613	619	780	749	842	1005	919	817	822	766	773	972	948	1026	653	808	787	1473	1196	1436	321	461	867	987	1545	912	1549	1101	966	1074	1109	1436	993	1029	1066	814	858	859	901	298	328	926	850	984
YDR362C	275	247	255	286	274	271	221	183	233	286	239	218	265	216	252	296	293	236	274	235	279	352	415	358	146	157	354	199	340	213	473	236	217	240	240	324	201	227	246	259	257	254	271	104	117	352	284	255
YDR363W	137	121	138	196	161	166	142	139	176	130	77	67	186	139	175	113	113	167	81	91	111	250	262	263	86	113	253	49	91	47	109	68	70	87	83	94	78	73	83	174	168	143	148	62	63	224	179	185
YDR363W-A	337	318	321	445	359	412	309	280	340	399	388	371	280	319	290	321	293	223	393	262	323	533	390	483	117	149	283	214	522	216	422	379	291	240	261	436	268	277	296	342	430	367	389	104	147	380	352	333
YDR364C	323	299	293	323	282	269	249	264	272	391	384	329	271	239	294	374	348	316	253	232	243	529	453	464	113	147	279	250	441	239	477	345	265	310	334	400	302	306	322	320	284	264	321	110	136	355	314	299
YDR365C	1599	1439	1516	1921	1638	1695	1480	1450	1576	1474	1169	1044	1552	1319	1511	1634	1630	1649	1183	1444	1438	2504	2514	2563	567	762	1551	1377	1811	1416	2562	1413	1068	1789	1482	2119	1310	1542	1540	1464	1363	1415	1208	479	508	1953	1576	1646
YDR365W-A	0	0	0	0	0	0	0	0	0	0	0	0	0	0	0	0	0	0	0	0	0	0	0	0	0	0	0	0	0	0	0	0	0	0	0	0	0	0	0	0	0	0	0	0	0	0	0	0
YDR365W-B	0	0	0	0	0	0	0	0	0	0	0	0	0	0	0	0	0	0	0	0	0	0	0	0	0	0	0	0	0	0	0	0	0	0	0	0	0	0	0	0	0	0	0	0	0	0	0	0
YDR366C	1	1	1	2	2	3	2	0	0	1	1	0	1	0	1	0	1	0	1	0	1	3	2	3	0	1	1	1	0	1	2	3	0	0	1	1	1	0	0	0	0	1	0	0	0	1	0	2
YDR367W	567	543	567	424	321	408	447	429	523	706	671	587	540	543	493	539	515	531	388	391	424	885	727	778	219	300	530	560	924	617	896	699	716	570	650	826	596	602	674	550	590	588	634	214	242	552	576	574
YDR368W	512	477	501	760	646	720	481	463	608	477	471	369	532	522	544	440	378	335	685	516	619	742	678	731	223	351	603	403	699	461	824	519	452	444	493	651	411	464	469	396	386	385	432	150	211	425	422	364
YDR369C	162	147	147	195	183	195	129	114	141	174	175	135	136	121	121	165	160	146	166	146	164	337	308	340	54	84	125	109	203	88	235	108	118	146	111	159	91	110	113	138	152	146	153	69	75	205	160	143
YDR370C	304	282	289	288	214	244	251	237	319	366	364	321	220	188	221	309	298	298	286	274	264	517	412	484	124	208	273	294	502	215	466	293	268	273	252	382	296	294	282	303	292	310	268	104	126	297	292	328
YDR371C-A	0	0	0	0	0	0	0	0	0	1	2	0	0	1	0	0	0	0	0	0	0	0	1	0	0	0	0	1	0	0	0	0	0	0	0	0	0	0	0	0	0	0	1	0	0	0	1	0
YDR371W	157	148	153	193	129	162	118	116	142	196	185	149	127	140	138	145	157	132	184	151	167	194	186	172	75	115	236	126	203	107	214	162	151	137	126	169	112	140	147	177	179	175	171	52	62	187	174	186
YDR372C	1234	1171	1192	1256	1174	1317	1184	1238	1354	1314	1345	1239	1161	1197	1165	1095	1095	979	1099	901	966	1903	1557	1691	540	668	1230	1045	1950	974	1779	1353	1299	1182	1086	1468	1185	1154	1168	1206	1176	1253	1347	475	549	1209	1190	1230
YDR373W	294	295	285	340	350	322	233	253	288	346	319	286	249	283	237	298	255	195	363	242	242	509	430	466	129	191	311	224	484	181	393	380	347	215	269	399	243	252	292	239	318	272	356	118	130	278	285	310
YDR374C	2	1	1	3	1	0	4	1	1	4	2	2	0	0	0	1	1	0	2	3	6	6	2	6	1	1	1	1	0	0	2	1	2	1	0	0	1	0	0	2	0	1	1	2	1	2	0	2
YDR374W-A	44	38	40	54	61	70	48	41	49	59	67	91	50	64	35	65	37	30	37	20	32	74	48	52	14	7	35	13	48	7	43	25	31	22	25	27	35	21	23	40	41	46	77	22	17	35	44	52
YDR375C	449	388	367	280	239	190	180	224	255	422	392	348	257	228	236	398	396	299	757	325	393	513	460	458	216	231	493	185	689	191	856	430	391	420	420	546	380	369	383	640	592	517	456	226	196	778	605	605
YDR376W	340	322	312	410	363	342	224	246	288	370	385	300	272	249	297	349	329	255	376	260	285	518	472	482	140	172	365	205	518	211	586	320	267	294	304	412	264	339	338	366	351	324	310	145	126	422	383	390
YDR377W	718	785	732	495	465	501	438	417	509	739	724	756	414	509	477	625	624	473	361	843	984	984	805	913	281	401	659	599	1815	556	1558	1258	1046	981	1092	1291	940	963	1072	623	766	776	1071	405	389	665	694	585
YDR378C	329	316	321	340	296	298	279	219	300	386	341	356	359	382	286	296	336	271	398	268	317	507	398	489	102	152	254	214	483	269	412	330	348	264	318	351	247	233	311	342	457	388	465	145	153	329	382	424
YDR379C-A	11	7	9	23	17	33	3	1	5	13	11	8	10	6	7	4	9	10	16	6	12	27	10	11	5	6	9	3	11	7	8	4	7	4	4	7	11	2	3	6	9	4	14	7	7	14	9	8
YDR379W	312	294	315	336	313	334	217	229	303	367	391	333	260	242	275	385	363	376	296	269	312	509	482	506	110	167	356	211	397	255	481	285	253	296	303	424	226	263	281	298	297	261	331	135	123	358	273	331
YDR380W	76	66	64	340	378	313	39	16	38	33	20	20	15	4	9	25	21	14	52	28	39	67	60	55	47	66	162	20	69	25	52	33	8	25	39	41	26	36	35	39	43	47	323	130	146	41	51	10
YDR381C-A	55	51	53	42	39	32	49	29	55	74	61	74	37	46	38	65	61	55	63	30	31	115	98	106	17	32	55	24	79	23	71	78	55	47	51	80	43	42	66	41	46	46	74	20	25	56	56	60
YDR381W	2628	2491	2542	2658	2382	2688	2276	2004	2589	3196	3172	3018	2344	2154	2111	2814	2878	2531	2461	2349	2637	3718	3443	3890	784	1007	2234	2191	3721	2266	3980	2801	2517	2617	2738	3111	2531	2602	2537	2687	2553	2626	2336	871	1017	2826	2684	2355
YDR382W	9563	9319	10122	9290	8727	9786	8256	7644	10706	11810	7626	11575	8050	10502	7464	11379	10759	9405	6910	7401	8704	6098	7894	11829	5062	5067	9633	8225	10988	12772	18861	15795	12757	9187	12445	11084	8701	11355	10077	9652	7087	11320	10829	4327	4375	11135	12170	10336
YDR383C	58	57	53	77	63	68	36	36	54	58	65	63	57	65	59	78	57	47	65	60	68	77	86	71	19	26	61	29	94	26	77	55	54	46	46	60	47	55	45	57	58	57	75	27	22	70	61	45
YDR384C	590	558	578	493	443	447	414	349	513	964	743	794	394	426	471	731	768	751	583	463	375	459	443	466	133	193	284	541	860	556	1019	836	859	669	679	806	576	600	618	664	663	753	451	145	182	755	763	796
YDR385W	7763	7445	7861	8968	8027	9811	12882	13079	15378	5434	5285	5359	13244	13501	14867	4015	4414	4418	4222	4500	4664	4950	4986	5033	1507	2025	4226	6082	8118	5744	7988	7100	5744	6031	5460	6806	5288	5551	5533	12796	13360	13560	10243	3836	4499	12795	12432	12267
YDR386W	117	114	111	135	132	156	78	91	105	155	161	121	103	76	103	137	154	122	130	114	163	223	238	181	34	68	113	78	155	65	143	109	76	107	90	116	104	95	112	108	106	95	108	33	40	107	86	91
YDR387C	170	166	171	209	196	217	129	129	163	194	184	208	161	178	175	153	164	131	167	135	159	311	323	312	71	91	151	129	293	122	274	187	173	159	125	171	132	137	171	133	147	141	202	72	95	130	129	170
YDR388W	845	727	752	1483	1379	1175	597	471	684	1028	813	839	611	637	587	1105	1056	852	638	580	673	1077	1155	1300	287	386	813	566	936	755	1859	726	593	645	637	800	518	573	642	669	566	648	673	250	307	919	735	617
YDR389W	580	554	563	638	644	698	481	506	599	625	636	563	493	404	590	476	533	539	571	478	560	832	794	738	208	343	510	528	826	479	929	586	503	624	563	780	520	606	550	566	549	556	555	248	271	656	597	512
YDR390C	634	589	608	697	549	613	499	521	624	713	622	624	485	465	563	656	588	612	624	521	509	959	859	884	293	451	810	504	940	462	919	636	537	686	573	797	587	592	613	653	627	625	572	239	253	668	647	589
YDR391C	132	131	122	110	97	137	71	110	119	186	184	158	92	162	87	133	128	137	137	132	121	150	135	124	23	22	38	91	304	84	288	149	184	137	129	169	132	146	139	126	95	114	176	60	63	129	114	162
YDR392W	160	153	157	169	125	182	132	138	134	215	164	167	130	130	107	160	162	145	175	149	161	172	171	200	92	117	190	128	253	112	232	195	160	148	151	237	113	170	157	164	148	180	212	82	88	158	142	134
YDR393W	328	322	312	284	226	238	205	193	232	332	374	328	218	216	249	266	321	237	479	299	362	436	346	405	131	204	426	195	581	207	566	386	323	332	332	413	277	315	317	393	449	427	336	164	160	468	418	356
YDR394W	1342	1297	1326	1621	1547	1672	1100	1147	1337	1352	1350	1223	1301	1217	1410	1197	1130	909	1197	1013	1321	2371	2023	2095	566	950	1561	1128	1983	1105	1918	1342	1126	1240	1222	1648	1107	1191	1300	1234	1356	1229	1339	686	773	1455	1302	1179
YDR395W	3688	3431	3581	3565	3329	3609	3088	3089	3700	4590	4277	3767	3448	2941	3592	3838	4097	4202	2857	3100	3577	5053	4822	5073	1427	1871	3741	3585	4950	3474	5920	3611	2876	4175	3687	4972	3293	3880	3679	3431	3256	3297	3232	1136	1203	3824	3414	2949
YDR396W	11	10	12	6	7	10	5	7	13	7	11	8	13	10	7	11	10	12	10	7	9	15	13	18	13	10	22	17	16	17	16	9	5	14	10	15	10	17	14	12	9	13	3	2	3	12	11	8
YDR397C	433	425	419	405	356	411	357	329	382	439	411	443	329	368	335	403	384	365	417	377	417	617	548	661	81	116	198	338	711	332	734	551	558	433	437	539	433	457	398	532	557	546	455	174	172	525	593	532
YDR398W	1687	1499	1575	1464	1212	1198	1504	1402	1639	1847	1444	1303	1549	1311	1570	1809	1746	1740	1339	1498	1521	2183	2384	2469	637	859	1526	1600	2084	1696	3003	1596	1253	1955	1709	2282	1535	1569	1734	1575	1462	1445	1389	543	612	1921	1673	1630
YDR399W	3911	3573	3792	2220	1830	2066	3989	3550	3972	3823	3636	3326	3874	3640	3195	3325	3034	3085	2676	3742	3871	4231	3442	4258	1479	1524	3207	4578	5941	4188	6111	4821	4574	4381	4283	5931	4231	3991	4829	4193	4456	4505	5246	1722	1525	4301	3990	4354
YDR400W	465	429	436	337	303	303	356	332	424	608	611	494	337	294	319	499	505	452	661	410	537	731	671	708	168	288	367	394	648	398	636	483	468	418	390	489	360	391	383	452	474	454	555	215	234	459	425	513
YDR401W	15	12	12	15	6	14	7	4	10	24	24	17	4	8	7	26	18	19	22	6	8	14	15	17	3	8	12	8	21	7	28	17	12	11	14	10	11	15	6	13	8	13	22	11	13	12	10	19
YDR402C	5	5	4	4	4	5	4	0	4	6	4	0	3	4	2	2	4	0	11	5	5	13	16	12	2	5	8	5	10	3	5	5	1	6	7	7	5	5	5	4	3	2	3	0	3	2	4	4
YDR403W	8	6	8	11	6	17	3	4	6	17	10	8	11	7	7	9	7	8	15	10	11	18	16	20	3	3	8	0	4	1	9	3	1	5	2	4	5	4	3	2	6	7	15	2	4	1	4	8
YDR404C	583	566	574	522	474	619	482	551	584	795	786	769	454	442	433	645	683	563	569	491	508	757	658	727	272	341	544	572	914	519	775	689	680	598	543	714	566	573	555	543	565	598	682	252	259	519	522	544
YDR405W	242	210	211	176	128	146	115	131	187	244	183	174	171	124	165	247	238	180	370	240	289	217	251	278	83	106	278	93	309	131	524	243	216	227	263	294	195	226	176	338	239	258	162	100	64	464	372	332
YDR406W	187	173	175	443	348	360	95	113	138	208	196	188	118	98	117	127	167	131	250	196	237	353	338	324	80	150	250	100	203	88	203	138	146	97	83	142	99	119	151	127	137	131	350	169	108	154	136	112
YDR406W-A	3	2	3	9	3	6	1	3	1	2	4	1	0	2	3	4	2	1	8	0	2	5	6	6	1	1	5	0	3	2	3	2	2	3	1	0	1	1	2	3	0	2	4	0	3	3	3	3
YDR407C	879	834	848	1130	996	1077	727	721	954	1027	940	919	642	626	799	831	945	777	905	774	890	1189	1189	1145	335	499	1114	717	1104	672	1319	894	643	853	774	981	679	859	740	941	939	891	838	349	377	1054	907	747
YDR408C	545	504	524	549	536	542	503	433	576	542	407	468	556	528	418	476	516	447	406	364	447	529	609	707	286	282	729	379	778	525	1072	681	637	619	635	667	541	617	551	456	369	406	784	279	272	482	524	462
YDR409W	229	191	203	299	259	216	167	163	211	238	218	187	151	166	203	228	224	209	196	160	209	350	323	332	74	132	231	210	251	191	413	192	144	228	168	258	186	174	203	226	196	163	209	78	90	257	166	191
YDR410C	99	99	97	100	96	111	66	83	69	148	136	112	82	85	85	91	89	101	119	74	71	112	135	122	59	67	121	82	163	92	132	124	98	92	94	133	97	106	107	77	95	89	134	50	65	89	84	79
YDR411C	270	259	261	312	311	307	195	179	226	310	325	338	191	214	203	263	333	217	207	153	175	497	487	481	115	167	259	193	414	230	488	302	224	246	214	331	199	203	272	236	233	277	331	93	132	268	256	250
YDR412W	384	351	365	326	259	289	263	238	303	478	403	294	305	282	277	521	471	478	362	415	429	539	523	543	146	184	303	319	511	325	622	375	361	439	420	557	376	376	449	355	302	296	286	137	122	429	369	443
YDR413C	2	2	2	2	2	1	0	0	2	2	2	2	0	0	1	0	3	0	2	3	3	0	3	2	3	0	2	2	6	1	3	6	3	0	2	1	3	2	2	3	5	4	1	0	0	3	3	3
YDR414C	262	260	257	227	240	259	264	276	339	289	271	277	215	220	210	215	237	199	344	259	284	384	400	413	127	188	296	241	434	202	366	271	228	250	262	288	214	252	243	216	249	239	356	130	158	225	209	225
YDR415C	209	206	201	225	180	221	142	161	190	272	271	202	164	209	163	207	226	191	247	189	217	316	279	286	61	116	197	160	291	188	320	207	191	197	210	278	163	210	225	225	214	209	193	88	77	236	244	184
YDR416W	391	367	374	482	414	456	303	348	384	438	370	376	406	376	423	398	383	366	311	288	317	512	484	509	95	185	333	289	550	335	639	381	322	381	402	501	333	379	381	428	379	402	359	125	119	496	445	380
YDR417C	6	6	4	6	5	3	6	2	3	10	5	5	6	3	6	8	7	3	1	1	5	8	7	3	3	4	5	7	8	8	12	16	5	1	5	5	7	6	3	6	7	7	6	2	2	6	5	1
YDR418W	17318	16810	17213	14535	13741	15468	15734	14416	18123	18704	17729	18258	15867	17129	15937	15551	15724	13670	13671	14827	15614	20402	16726	19501	6625	8250	15684	18504	28443	18888	29061	23537	21976	18918	19972	23708	18315	18291	18691	17173	18488	19019	18988	6663	7059	17728	18220	16605
YDR419W	222	208	214	211	217	219	191	183	227	187	191	152	218	207	245	181	144	125	225	203	192	377	339	368	70	113	228	156	327	160	372	227	181	212	223	306	191	205	231	228	199	241	226	104	114	281	245	226
YDR420W	739	671	724	754	692	740	715	644	772	1038	847	865	650	627	706	727	748	895	723	527	715	996	941	997	323	434	841	566	834	527	890	738	558	659	566	756	636	646	571	826	790	861	756	281	288	827	745	774
YDR421W	204	190	200	317	288	328	166	185	246	257	258	201	171	148	204	252	258	236	201	158	185	363	314	336	62	123	228	115	222	99	272	146	125	140	141	183	109	135	158	213	183	201	180	91	100	242	207	177
YDR422C	630	582	611	637	629	657	531	546	679	596	593	515	565	536	604	553	614	586	607	495	540	1019	925	1061	265	370	656	641	776	588	1028	648	497	603	586	750	495	584	592	650	608	631	630	211	247	624	608	564
YDR423C	176	160	142	246	244	189	125	118	141	414	275	255	116	120	135	387	490	325	157	103	105	331	316	259	44	68	140	28	80	31	96	36	29	49	39	41	33	40	32	183	195	181	175	56	85	263	221	180
YDR424C	183	175	172	200	165	173	148	120	167	192	190	185	140	158	143	195	175	144	155	112	116	273	198	239	42	76	101	173	324	170	270	254	235	186	234	252	202	176	239	185	194	167	190	61	86	193	192	166
YDR425W	136	127	128	190	188	180	119	114	141	177	132	119	96	108	118	131	143	116	118	100	132	246	258	248	32	68	135	96	157	88	198	89	82	120	134	140	102	113	113	127	117	126	141	62	55	146	125	131
YDR426C	2	2	1	2	1	0	0	3	0	2	2	2	1	1	1	2	1	1	1	3	1	5	5	4	2	0	2	1	1	1	2	4	0	0	1	1	0	1	2	1	2	1	3	1	0	2	3	4
YDR427W	1595	1554	1580	1666	1469	1618	1264	1204	1592	1510	1647	1566	1334	1345	1456	1298	1378	1130	1508	1390	1512	2886	2342	2463	656	1003	1822	1707	2856	1515	2533	1908	1707	1474	1584	2105	1542	1569	1544	1406	1589	1457	1697	608	791	1445	1419	1422
YDR428C	225	214	214	235	215	241	202	207	233	184	155	168	174	195	186	188	163	144	216	241	201	550	500	532	36	54	57	180	304	216	310	189	189	188	210	262	170	161	167	254	248	248	217	90	82	276	273	289
YDR429C	2549	2343	2411	2335	2313	2215	2027	1914	2331	2791	2456	2300	2203	2175	2050	2686	2628	2429	2223	2212	2222	3150	2735	3356	812	1167	2269	2354	3452	2701	4841	2821	2594	2783	2827	3228	2376	2537	2710	2609	2281	2380	2143	782	808	2909	2852	2573
YDR430C	959	816	812	942	878	712	555	524	734	767	757	627	592	551	723	825	876	650	1694	818	1034	1068	998	1031	357	548	1189	518	1249	495	1839	869	670	873	772	996	657	711	770	1223	1133	1042	987	397	513	1491	1158	988
YDR431W	0	0	0	0	1	0	0	0	1	0	0	0	0	0	0	0	0	0	0	0	0	0	1	0	0	0	0	0	0	0	0	0	0	0	0	0	0	0	0	0	0	0	0	0	0	0	2	0
YDR432W	1848	1584	1668	2452	2321	1927	1824	1569	2132	2180	1602	1859	1674	1690	1939	2367	2350	1867	1277	1426	1512	1682	1820	1747	654	735	1799	1472	2032	1777	3816	1692	1360	1636	1425	1994	1294	1419	1469	1573	1369	1598	1849	729	664	1968	1587	1369
YDR433W	10	8	8	13	17	12	6	6	7	12	5	9	8	5	9	16	14	9	8	5	7	14	11	10	2	5	2	9	9	5	26	12	4	8	7	6	2	4	10	7	9	11	11	1	5	7	9	13
YDR434W	708	681	679	721	661	699	539	514	649	795	800	674	566	564	609	673	663	530	780	627	681	1052	924	943	355	576	863	592	1174	545	1035	768	717	660	612	801	640	630	706	734	748	719	740	319	371	742	634	683
YDR435C	134	127	132	175	179	203	96	107	114	133	117	132	119	134	124	110	98	100	152	79	125	179	146	167	52	83	141	129	245	122	216	138	132	113	139	183	121	124	136	135	138	106	133	52	60	141	133	132
YDR436W	116	104	105	190	179	183	92	82	94	115	94	93	88	85	99	106	101	79	145	69	129	163	191	196	37	70	75	58	162	66	186	102	95	88	96	121	63	90	102	112	103	95	140	48	57	151	95	88
YDR437W	31	30	34	38	44	41	17	24	33	41	38	45	33	20	45	24	23	36	35	25	30	39	36	37	11	18	35	19	55	24	41	33	33	36	33	34	39	23	33	31	35	39	30	10	13	37	40	30
YDR438W	82	79	79	88	79	109	55	56	82	109	103	92	73	74	68	75	80	68	99	63	67	104	125	111	36	44	77	73	113	59	115	78	90	64	71	80	67	95	73	87	91	77	115	37	53	69	74	74
YDR439W	54	48	58	54	52	54	42	45	45	47	37	37	49	23	62	59	46	46	40	49	49	73	71	64	62	94	194	28	42	25	73	46	39	45	35	65	31	48	40	37	33	37	116	40	51	51	54	57
YDR440W	271	265	257	368	362	351	197	206	248	309	294	230	234	176	198	278	289	221	354	253	333	443	461	454	91	144	277	178	404	215	400	260	203	219	233	306	205	278	233	269	235	234	228	109	122	289	270	232
YDR441C	235	233	242	304	279	361	176	217	203	292	205	196	116	103	118	214	190	164	294	260	347	426	468	418	237	322	530	167	325	139	335	246	228	201	252	284	215	217	206	186	184	172	186	71	72	170	151	192
YDR442W	1	1	1	0	2	0	1	0	1	0	1	1	1	0	1	1	0	0	4	1	2	0	3	2	0	0	2	1	1	0	1	0	0	0	0	0	0	0	1	0	0	0	0	0	0	0	0	2
YDR443C	475	437	454	549	509	517	343	373	486	557	528	464	358	350	444	483	536	433	552	396	494	880	916	897	154	290	567	374	535	344	732	398	338	399	377	512	340	411	358	450	397	427	449	156	197	508	380	338
YDR444W	333	297	298	353	280	293	202	164	236	428	387	350	266	203	252	408	441	374	412	232	272	473	482	463	117	209	311	231	427	259	592	318	281	337	299	401	282	325	327	282	255	238	293	130	140	320	297	274
YDR445C	1	1	1	0	0	2	4	1	0	0	0	4	0	1	0	2	2	0	0	0	1	0	2	3	0	0	1	1	2	1	1	0	0	1	3	2	0	0	0	1	0	1	0	0	0	0	0	0
YDR446W	1	1	1	2	4	0	0	1	0	0	0	2	0	1	0	1	1	2	2	3	1	6	1	2	0	1	1	0	0	0	3	1	0	1	2	0	0	1	1	1	0	0	1	0	1	0	2	1
YDR447C	9341	9061	9357	7100	6379	7339	12811	11699	13903	8757	8728	8665	12642	12999	12902	7638	7031	6211	5711	6997	7231	11981	9226	11427	3033	3854	7018	10449	15155	9722	14115	12282	11167	9495	10024	12804	9428	8648	9903	8359	10049	9728	9492	3268	3245	9111	9582	9097
YDR448W	198	181	180	253	229	256	159	144	154	229	199	205	169	161	186	204	239	185	223	151	200	245	240	217	61	87	182	144	239	135	313	179	165	204	195	254	138	201	164	222	183	181	187	81	59	224	190	161
YDR449C	858	750	756	782	594	542	630	603	685	971	893	772	753	702	746	1205	1074	943	667	823	788	1214	1082	1204	330	376	737	682	995	729	1684	793	577	845	858	1080	717	734	820	704	684	730	693	248	301	999	790	690
YDR450W	15623	15178	15730	13762	12497	14292	14644	13674	16520	16846	16039	16486	14230	15350	14169	14030	12793	10942	12483	12934	13470	18825	14044	18034	5531	7597	13086	16328	25847	16329	24763	21860	20467	16219	17931	23171	16883	15528	18471	14973	17767	17448	18540	6586	7159	16283	17223	15909
YDR451C	127	121	129	232	226	251	93	71	102	144	132	157	130	108	105	100	118	119	119	99	105	223	196	192	67	96	192	100	132	109	134	111	98	75	126	115	95	109	91	123	126	118	143	39	57	133	121	129
YDR452W	1064	1029	1024	1197	1085	1297	204	234	300	1552	1443	1291	333	346	283	1222	1230	1030	1506	1157	1348	2247	2023	2102	620	1016	1777	893	1849	724	1708	1340	1062	1121	1081	1504	1058	1176	1151	477	500	504	1357	504	596	470	445	393
YDR453C	49	51	61	37	43	54	28	20	29	60	59	54	21	16	24	50	62	47	32	29	40	36	37	33	178	228	403	28	89	24	74	53	39	30	45	42	39	26	49	40	28	37	47	13	16	28	24	30
YDR454C	1806	1727	1774	1574	1339	1628	1495	1401	1614	2118	2126	2043	1416	1545	1351	1904	1799	1717	1400	1375	1347	2638	2109	2503	688	960	1500	1739	3075	1793	2889	2369	2243	1791	1841	2484	1906	1677	1992	1651	1809	1821	2163	709	891	1713	1767	1681
YDR455C	0	0	0	0	0	0	0	0	0	0	0	0	0	0	0	0	1	0	0	0	0	0	0	0	0	0	0	0	1	0	2	0	1	0	0	0	0	0	0	0	0	0	0	0	0	0	0	0
YDR456W	733	727	719	780	728	824	548	535	660	975	840	770	532	613	582	623	656	555	687	505	523	1139	1032	1063	329	488	826	545	1230	478	1108	971	839	759	671	980	703	743	869	737	807	755	777	329	389	750	753	672
YDR457W	3924	3608	3868	5712	4947	5752	2795	3170	3732	4487	3927	3767	3094	2975	3761	3327	3773	4153	4346	3215	3794	5648	5764	6077	1547	2307	4865	3262	4587	2851	5247	3799	2719	3819	3111	4498	3050	3627	3189	4006	3824	3886	4114	1471	1778	4406	3616	3201
YDR458C	507	445	466	562	476	473	420	395	484	603	497	485	441	387	464	643	596	541	420	363	397	712	672	731	196	216	506	359	604	341	796	439	404	513	427	591	408	426	405	447	485	486	475	141	229	611	551	458
YDR459C	175	171	171	170	165	179	126	126	147	257	261	255	117	123	145	216	245	216	147	125	150	239	213	236	69	97	179	156	275	114	259	203	155	180	181	212	164	156	153	141	169	173	207	75	77	174	158	176
YDR460W	169	159	158	157	132	140	135	135	144	225	206	166	133	140	143	208	185	176	151	154	151	279	225	287	66	93	183	131	225	120	272	161	133	142	157	229	131	158	161	161	161	129	162	85	79	176	167	133
YDR461C-A	7	5	6	24	11	14	9	10	5	6	2	2	7	6	10	8	7	5	5	3	4	7	8	5	2	2	10	1	4	0	4	2	3	4	0	2	4	2	2	8	3	11	10	0	5	4	8	8
YDR461W	1	1	2	0	1	2	1	1	0	2	1	5	0	2	0	1	1	0	0	1	1	4	0	2	0	3	5	1	0	2	2	1	2	1	1	5	1	2	3	3	2	0	2	0	0	2	2	4
YDR462W	171	149	144	99	107	108	79	78	93	193	123	144	96	107	122	172	154	119	311	126	125	149	161	186	47	68	142	76	264	90	365	182	186	151	201	208	179	163	164	216	192	172	178	78	71	259	238	232
YDR463W	400	358	371	588	545	554	352	361	461	433	391	353	392	338	410	445	410	384	428	315	359	631	664	617	135	194	398	290	508	303	677	308	245	380	341	470	281	333	330	281	264	294	294	118	131	398	280	260
YDR464C-A	0	0	0	0	0	0	0	0	0	0	0	0	0	0	0	0	0	0	0	0	0	0	0	0	0	0	0	0	0	0	1	0	0	0	0	0	0	0	0	0	0	0	0	0	0	0	0	0
YDR464W	696	636	652	912	904	842	520	498	623	941	854	863	560	431	628	939	961	918	706	579	619	1027	1045	1112	245	368	668	492	677	462	1008	640	453	700	586	761	492	612	511	637	625	598	580	192	233	681	570	491
YDR465C	933	895	903	740	613	684	873	817	912	1127	961	793	860	755	781	988	1025	981	725	860	740	1604	1461	1576	333	476	779	837	1285	823	1434	1044	901	947	991	1321	780	1044	1082	916	771	783	762	311	316	1070	1009	1071
YDR466W	338	302	321	407	341	404	239	269	333	383	325	314	278	278	335	371	384	362	281	274	290	516	482	480	106	141	324	268	382	277	538	272	215	316	318	407	275	273	294	329	345	335	340	107	121	422	344	329
YDR467C	13	11	11	13	17	15	9	11	10	16	12	14	14	15	5	16	14	14	10	7	12	22	18	14	6	6	15	14	16	5	21	8	12	7	8	13	7	5	11	11	8	12	16	11	5	12	9	13
YDR468C	218	201	204	281	228	312	153	175	177	287	223	182	158	191	196	202	205	167	212	178	186	298	251	265	111	152	195	173	307	151	291	222	239	200	175	248	193	198	209	191	192	210	301	84	103	220	235	223
YDR469W	217	203	204	224	200	243	175	167	202	272	258	217	191	187	158	234	197	206	193	171	159	312	263	272	69	97	203	176	322	166	265	266	225	189	182	275	214	179	193	213	243	214	283	86	116	246	228	206
YDR470C	221	201	203	226	218	217	140	115	185	215	205	149	151	163	219	195	187	128	326	200	208	379	306	332	82	123	233	129	323	135	362	193	174	182	178	300	144	219	209	266	242	222	233	109	114	288	239	227
YDR471W	7267	6972	7308	5285	4952	5843	6525	5985	7379	7858	7472	7649	6377	6622	6013	6588	6023	5753	5465	6296	6574	8765	6938	8756	2747	3656	6633	7782	11676	7751	11717	10242	9512	8162	8620	10753	8287	7353	8636	6882	7929	8066	8859	3099	3188	7705	7712	7115
YDR472W	332	334	333	363	350	404	289	291	354	404	365	350	341	357	337	324	383	301	250	269	305	522	453	440	146	229	331	270	525	277	473	393	305	298	315	437	293	293	370	320	355	341	329	116	163	361	309	281
YDR473C	83	80	78	103	80	97	59	61	98	96	77	71	64	63	65	68	92	78	106	76	69	143	138	130	27	47	87	51	118	55	118	87	67	85	78	90	63	92	90	92	73	75	74	37	34	91	77	59
YDR475C	219	196	203	348	349	320	175	162	229	210	207	155	191	184	176	227	215	210	184	178	209	330	357	321	65	131	233	123	241	166	406	178	184	168	161	235	172	169	172	205	162	169	248	59	84	227	181	183
YDR476C	159	152	170	159	152	146	127	127	222	276	100	217	105	164	76	167	178	144	80	102	89	92	220	274	71	87	205	84	149	182	305	245	191	134	190	116	119	173	143	222	116	215	205	56	57	246	220	278
YDR477W	793	677	709	988	811	744	607	519	812	914	840	827	643	581	703	1191	1166	925	742	623	730	1073	1154	1208	292	406	820	483	775	484	1343	551	495	507	512	673	487	493	506	774	677	728	753	276	302	1094	778	683
YDR478W	111	112	112	104	81	96	128	117	151	126	100	128	115	115	108	100	103	81	115	123	110	170	176	169	32	52	79	68	158	82	133	128	93	90	115	151	81	85	101	111	132	145	168	55	61	128	138	120
YDR479C	133	129	124	178	189	158	67	89	109	161	148	124	98	109	126	131	132	107	160	75	94	240	237	207	48	79	150	89	199	94	198	113	122	102	113	133	84	110	121	138	145	111	158	51	64	147	149	138
YDR480W	104	96	99	112	111	112	93	64	116	124	129	114	101	66	105	114	124	88	98	89	90	183	172	167	41	61	120	74	142	84	170	98	73	99	104	125	86	100	89	87	76	75	89	30	50	93	72	76
YDR481C	640	609	612	2839	2561	2647	461	522	593	648	577	565	576	556	529	483	536	481	308	252	296	800	878	906	138	262	323	275	492	315	594	345	283	285	319	414	245	335	310	659	656	596	554	195	251	729	642	670
YDR482C	74	64	71	90	65	81	38	48	76	110	55	80	59	70	53	127	87	62	63	59	73	62	76	109	39	39	92	51	52	56	113	93	70	58	73	50	57	59	51	82	55	83	72	39	36	85	96	91
YDR483W	2730	2655	2763	2647	2430	2933	2289	2110	2680	3320	3538	3148	2258	2205	2299	2818	2723	2725	2631	2542	2758	4078	3624	3715	1193	1727	3103	2726	4292	2602	3887	3246	2823	2735	2729	3670	2559	2805	2952	2494	2478	2429	2776	951	1110	2532	2431	2492
YDR484W	303	282	292	269	268	296	219	226	266	306	284	236	269	211	263	274	322	275	263	252	281	592	585	602	104	138	305	238	433	244	483	303	226	328	309	405	269	274	285	318	243	296	294	101	106	314	288	289
YDR485C	288	256	269	377	301	367	223	219	248	327	286	252	232	220	230	340	384	299	257	206	279	446	458	464	127	143	324	204	321	211	450	234	162	267	245	323	229	245	246	260	249	269	238	71	98	349	259	263
YDR486C	311	298	305	316	295	344	244	283	329	471	431	372	236	244	214	340	360	310	247	209	223	510	378	460	107	143	291	214	484	231	407	327	281	265	279	400	257	276	293	306	336	312	428	137	171	317	294	349
YDR487C	863	818	886	1019	922	1000	773	609	876	943	840	948	686	770	682	783	806	717	927	739	858	1084	1036	1300	415	630	1064	589	1145	716	1228	883	888	686	770	889	628	641	680	1100	1035	1074	922	309	360	1169	1138	1240
YDR488C	87	75	81	137	133	115	61	62	89	116	78	110	74	73	75	144	142	101	68	71	77	76	127	155	32	46	94	32	51	67	174	53	42	53	51	55	36	52	34	100	57	78	72	29	33	124	103	96
YDR489W	113	108	113	68	73	78	89	86	115	109	112	110	102	105	99	91	95	95	88	100	107	210	191	188	45	57	110	97	189	139	216	133	126	122	125	159	112	98	134	115	109	94	101	29	34	135	124	104
YDR490C	271	258	263	271	241	249	178	202	227	462	372	391	201	188	217	409	446	355	236	207	243	540	593	564	98	158	297	184	304	228	500	243	194	235	210	297	178	242	237	141	163	171	216	88	101	216	208	177
YDR491C	0	0	0	1	0	1	0	0	0	3	0	1	0	1	0	0	0	0	0	0	1	0	0	1	0	0	1	0	1	0	0	1	1	0	1	0	0	0	0	0	0	0	1	0	0	1	0	0
YDR492W	806	743	868	489	396	489	803	870	979	1783	1309	1286	746	735	840	1141	1266	1528	470	541	596	760	694	815	435	608	956	688	1092	579	1017	892	1317	791	601	1081	801	672	827	610	557	644	896	329	345	659	580	744
YDR493W	138	126	125	75	65	77	74	73	93	132	114	116	67	56	79	113	104	72	232	113	128	197	163	179	51	69	122	72	257	73	232	175	186	111	143	171	152	122	151	191	201	158	177	44	66	193	191	205
YDR494W	654	597	587	282	280	325	283	309	415	615	679	552	341	359	382	572	550	457	1315	564	699	823	711	751	249	339	631	377	1304	355	1247	876	758	678	645	937	653	563	696	773	833	744	726	231	332	880	717	769
YDR495C	242	227	227	322	311	286	162	145	226	323	344	283	220	184	256	278	306	268	286	190	238	415	372	358	74	114	222	130	289	173	345	214	169	223	189	245	131	194	170	225	221	202	230	118	110	269	207	193
YDR496C	3539	3265	3415	2815	2188	2350	3022	2847	3177	3621	3358	2820	2977	2846	3036	3463	3439	3430	2792	3389	3273	5707	5310	5941	1496	1873	3668	3601	4969	3415	5874	3557	3064	4310	3810	5314	3656	3740	3881	3344	3140	3170	2730	1153	1224	3674	3357	3463
YDR497C	2289	2249	2209	2943	2794	3236	1425	1497	1692	2271	2137	2056	1860	2169	2034	1982	1863	1818	1495	1551	1748	2244	2116	2177	638	1283	1544	2713	4454	2549	4780	3446	2391	2971	2726	3698	2520	2962	3281	1921	1930	1977	2452	868	1153	2126	1937	1786
YDR498C	251	240	253	258	236	246	191	186	217	305	305	281	241	234	257	275	274	248	200	208	263	374	358	393	94	156	295	220	371	217	412	239	231	276	260	327	224	240	250	261	207	229	203	65	101	228	256	243
YDR499W	156	153	143	219	219	195	129	110	168	177	180	172	133	121	144	186	209	148	158	135	124	244	261	243	39	67	171	101	224	94	238	144	107	152	138	178	116	156	120	146	146	120	148	56	56	152	122	106
YDR500C	6187	5953	6264	5139	4953	5438	6020	4993	6510	6813	6598	6431	5679	6199	5434	5767	5323	4663	4296	5059	5074	6981	5321	6961	2088	2505	5054	6886	10577	6742	10115	8090	8290	6805	7532	9922	7197	6310	8280	5865	6830	6537	6833	2225	2330	6314	6773	6301
YDR501W	96	91	88	94	93	104	60	52	79	120	132	103	88	66	70	119	128	101	74	89	120	165	176	151	37	54	120	76	111	83	184	82	62	87	94	97	76	86	73	71	72	52	116	41	47	69	85	61
YDR502C	2404	2321	2290	1876	1647	1642	1970	1763	2453	3391	3220	3185	3685	3669	3868	3536	3376	3133	2618	2922	3435	1252	1256	1300	729	1508	1964	1974	2831	2238	4097	2353	1302	1855	2018	2381	1762	2014	1913	2618	2615	2547	1538	584	750	3166	3039	2243
YDR503C	125	119	122	125	109	132	94	96	96	157	139	118	98	102	119	117	122	65	102	76	117	260	244	290	46	56	81	123	210	113	166	140	129	116	111	152	117	108	140	117	132	120	111	57	60	119	87	101
YDR504C	27	24	25	42	34	38	10	11	19	32	19	33	16	15	16	27	32	23	27	22	24	32	34	35	22	15	42	16	44	13	48	31	14	21	21	34	22	21	26	27	20	27	36	17	15	21	25	17
YDR505C	689	663	659	934	824	892	504	476	654	710	695	631	487	498	675	673	719	581	753	675	825	1033	1081	1031	258	431	881	467	1010	475	1180	615	392	655	661	811	546	643	584	645	658	598	673	275	291	820	680	557
YDR506C	37	30	36	120	97	121	24	17	21	63	28	39	20	29	34	47	39	33	107	48	72	30	46	39	19	28	61	13	24	8	21	11	11	10	14	26	16	22	11	12	10	16	39	21	25	17	12	21
YDR507C	1246	1160	1166	1590	1341	1415	994	1078	1346	1155	1126	1013	1324	919	1174	1277	1392	1086	1055	1071	1337	1727	1775	1708	394	741	1432	869	1476	907	2245	1085	764	1208	1129	1396	873	1204	1018	1374	1310	1299	1011	421	522	1597	1328	1069
YDR508C	2569	2485	2534	2156	2130	2308	2482	2476	3115	2606	2075	2105	2418	2456	2986	1958	2088	1845	2164	2083	2242	3535	3776	3806	1170	1712	2848	2487	3399	2475	4377	2987	2171	2162	2479	2964	1852	2760	2421	2847	2798	3098	3008	1057	1209	3318	2995	2414
YDR509W	0	1	0	0	0	0	0	0	0	0	2	0	0	2	1	0	0	0	0	0	0	0	0	0	0	0	1	0	1	0	1	1	0	0	0	1	0	1	0	0	1	0	0	0	0	1	0	0
YDR510C-A	0	0	0	0	0	0	0	0	0	1	0	0	0	0	0	0	0	0	0	0	0	0	0	1	0	0	0	0	0	0	1	1	1	0	0	0	0	0	0	0	0	0	0	0	0	0	0	0
YDR510W	982	927	956	1210	1187	1233	835	773	999	1066	1100	1019	874	885	881	886	831	756	956	649	784	1495	1116	1391	243	365	674	766	1502	778	1402	1099	1066	916	976	1300	923	911	1024	1019	1108	1052	1093	369	370	1048	1029	1020
YDR511W	135	130	126	97	87	86	76	92	82	95	107	107	71	88	89	93	73	55	211	97	122	229	173	196	45	58	89	88	275	78	229	181	185	133	178	209	142	122	147	167	190	175	198	69	73	154	165	194
YDR512C	78	72	77	80	71	102	76	82	117	67	47	67	75	90	80	73	53	47	82	48	53	166	145	141	15	25	42	53	113	58	101	79	67	57	76	94	53	73	69	72	89	80	112	27	34	83	67	99
YDR513W	572	567	534	569	528	629	469	452	554	639	679	702	439	483	488	471	476	327	409	346	375	907	786	785	117	155	265	394	1018	372	824	610	480	449	552	572	393	496	473	752	878	863	966	300	392	778	747	735
YDR514C	222	206	212	204	152	190	191	174	234	339	313	266	177	187	189	317	323	317	257	174	192	245	249	237	70	73	202	141	292	143	272	231	188	177	214	298	207	201	228	225	185	197	265	80	103	240	244	194
YDR515W	353	333	327	270	227	218	253	253	337	360	393	315	267	243	292	313	319	261	616	310	334	596	515	551	136	199	363	228	573	235	445	314	290	259	267	359	266	288	321	486	467	448	360	132	155	436	489	419
YDR516C	145	132	137	412	365	315	52	64	81	188	180	170	73	99	63	162	120	101	186	71	76	152	194	167	42	80	124	35	280	59	216	116	336	120	92	122	124	89	117	84	87	75	226	77	103	96	73	141
YDR517W	380	352	356	553	559	528	283	262	350	474	396	388	371	386	403	413	456	327	330	289	351	283	341	320	118	173	323	257	510	354	787	429	430	353	360	406	310	335	358	359	272	319	360	105	145	443	404	333
YDR518W	450	434	450	597	566	631	361	401	421	561	581	502	477	427	439	470	463	477	513	461	472	693	642	675	196	311	526	390	535	383	507	465	408	359	335	427	324	346	352	412	403	381	537	206	253	357	374	402
YDR519W	287	279	281	342	260	303	248	263	304	390	385	348	260	302	236	302	292	265	343	316	343	349	314	294	161	219	361	213	406	177	304	286	278	223	201	299	214	224	244	260	333	271	398	144	155	293	237	341
YDR520C	226	207	213	282	218	237	180	170	170	254	237	229	176	161	196	217	222	208	270	215	222	402	327	372	91	135	211	167	300	160	308	209	180	234	195	275	171	200	212	191	200	200	232	92	118	220	218	199
YDR521W	0	0	0	0	0	0	0	0	0	0	0	0	0	0	0	0	0	0	0	0	0	1	0	0	0	0	0	0	0	0	0	0	0	0	0	0	1	0	0	0	0	1	0	0	0	0	0	1
YDR522C	1	1	0	1	0	0	1	0	0	2	2	0	0	0	1	1	0	1	3	0	2	1	3	1	0	0	0	0	0	0	0	1	0	0	0	1	1	0	1	0	2	0	2	1	0	0	0	0
YDR523C	20	18	23	19	14	23	14	21	29	18	12	5	15	15	28	14	22	25	21	18	18	47	42	59	19	18	35	17	21	8	19	13	9	13	12	19	19	12	15	28	22	26	20	8	9	23	17	33
YDR524C	521	487	503	501	409	465	505	450	556	583	577	469	444	409	461	520	532	496	564	529	546	865	780	764	243	328	630	338	686	337	674	448	388	452	427	563	403	396	395	637	602	632	495	172	221	593	563	629
YDR524C-A	0	0	1	0	1	0	1	0	2	0	1	0	0	0	1	0	2	0	0	0	0	0	0	0	0	0	0	0	0	0	1	0	1	0	0	2	0	0	0	0	0	1	0	0	1	1	0	2
YDR524C-B	3980	3893	4151	5418	4791	5951	2669	2412	4082	6930	2977	6601	2593	4661	2489	4694	4826	4132	2680	3055	3073	1780	3149	4282	1634	1536	3987	2093	3986	5278	7208	7083	4350	3201	5434	3326	3110	4599	3060	4377	2938	5098	6143	1596	1596	5171	5353	4967
YDR524W-C	2	2	2	0	2	1	0	1	2	3	5	2	4	3	3	2	0	0	0	0	3	4	3	2	0	1	0	2	4	3	4	7	3	3	4	2	1	1	2	2	3	4	2	2	1	6	0	2
YDR525W	0	0	0	1	0	1	2	0	0	0	0	0	0	0	0	0	0	0	0	0	0	0	0	0	0	0	0	0	0	0	0	0	0	0	0	1	0	0	0	1	0	0	0	0	0	0	1	1
YDR525W-A	72	63	67	106	95	93	55	67	74	120	107	124	45	54	43	98	76	66	48	45	43	90	61	77	35	32	51	47	87	60	126	75	77	43	46	60	54	29	59	54	75	75	96	23	36	64	67	72
YDR526C	1	1	1	0	3	1	2	2	2	3	0	1	0	0	0	1	2	1	2	1	1	3	0	4	0	1	1	0	2	0	2	0	1	1	1	3	0	0	0	0	1	1	1	1	2	1	0	2
YDR527W	776	708	743	806	620	703	690	616	737	861	797	618	737	671	771	806	763	744	597	609	665	1221	1142	1295	233	308	615	730	1085	792	1154	797	600	805	711	1132	749	788	757	791	693	696	575	236	215	890	784	798
YDR528W	277	252	269	348	323	355	225	236	261	324	293	276	330	216	338	283	284	262	302	220	290	409	385	382	85	173	335	210	298	211	405	197	183	231	240	324	181	228	204	285	285	256	243	129	162	300	272	198
YDR529C	1207	1312	1208	532	535	645	841	856	956	1468	1542	1521	901	1054	1033	1210	1196	949	497	1138	1311	1820	1379	1722	427	706	1257	835	2883	739	2453	2134	1247	1532	1581	2016	1469	1474	1582	1166	1387	1374	1573	571	638	1381	1243	1134
YDR530C	102	108	104	147	145	168	60	79	92	150	159	164	70	94	88	131	141	119	72	79	86	146	129	135	39	83	113	70	159	75	175	128	95	82	91	130	80	90	68	68	90	89	132	56	45	107	104	94
YDR531W	968	940	914	613	582	687	796	791	949	1022	1074	901	1003	881	1024	960	1069	970	822	807	874	1594	1388	1427	116	275	396	910	1521	899	1603	1143	879	1008	1044	1344	931	1041	1009	1068	1062	905	972	396	439	1105	1025	1000
YDR532C	97	94	94	89	102	99	80	62	66	135	124	111	78	64	80	114	112	93	90	74	101	161	133	150	29	62	92	70	147	66	113	103	93	80	79	125	87	97	90	107	124	102	121	26	43	103	102	94
YDR533C	132	126	134	83	95	99	89	125	126	206	170	208	57	85	62	154	152	114	270	220	248	464	383	457	41	103	119	29	116	46	59	40	53	25	38	45	31	30	35	106	156	147	227	82	141	136	96	116
YDR534C	24	21	24	19	23	27	28	15	8	43	33	33	12	2	12	19	37	33	34	21	40	33	35	50	4	7	15	15	30	20	57	32	21	30	20	28	19	35	33	18	11	18	14	4	4	12	17	16
YDR535C	5	6	5	6	5	3	9	6	8	2	8	7	4	7	4	5	4	2	5	6	5	6	4	6	1	8	4	4	5	5	12	10	9	5	5	7	2	9	3	6	2	2	3	2	5	7	5	9
YDR536W	1	2	2	0	3	2	1	0	1	0	2	1	0	0	1	0	2	0	1	3	4	1	4	2	1	16	14	0	0	1	0	0	3	1	0	0	0	0	0	2	1	0	0	1	1	2	2	0
YDR537C	1	1	1	2	0	0	0	2	0	1	0	0	0	1	2	1	0	0	0	0	0	1	2	1	0	0	1	0	0	0	0	0	1	0	0	0	0	1	1	3	1	4	0	0	0	0	2	2
YDR538W	146	143	143	156	148	149	158	144	212	101	105	99	163	159	130	88	86	64	151	168	162	230	239	235	61	98	165	190	215	140	225	180	148	110	131	174	146	135	155	146	164	155	127	33	60	134	134	104
YDR539W	250	221	235	322	297	245	500	501	626	107	91	76	587	479	560	98	101	99	106	75	111	283	271	258	48	89	138	100	123	85	240	89	104	90	95	134	74	86	95	453	483	472	176	66	67	571	473	452
YDR540C	43	39	42	26	22	20	10	10	13	68	91	69	13	7	14	59	69	72	73	57	77	146	126	119	21	27	75	42	61	21	51	29	24	36	30	39	28	24	39	7	5	14	59	22	25	8	6	9
YDR541C	169	152	165	138	111	149	171	149	171	170	164	154	195	177	201	142	132	109	185	138	146	532	436	470	73	95	185	87	195	80	153	112	110	101	86	139	76	99	103	161	171	208	145	62	66	209	160	183
YDR542W	0	0	0	0	0	1	0	0	0	0	0	0	0	0	0	0	0	0	1	0	0	1	0	0	0	0	0	0	0	0	0	0	0	0	0	0	0	0	0	0	0	0	0	0	0	0	0	0
YDR543C	0	0	0	0	0	0	0	0	0	0	0	0	0	0	0	0	0	0	0	0	1	0	0	0	0	0	0	0	0	0	0	0	0	0	0	0	0	0	0	0	0	0	3	0	0	0	0	0
YDR544C	0	0	0	0	0	0	0	0	0	0	0	0	0	0	0	0	0	0	1	0	0	0	0	0	0	0	0	0	0	0	0	1	0	0	0	0	0	0	0	0	0	0	0	0	0	0	0	2
YDR545C-A	0	0	0	0	0	0	0	0	0	0	0	0	0	0	0	0	0	0	0	0	0	0	0	0	0	0	0	0	0	0	0	0	0	0	0	0	0	0	0	0	0	0	0	0	0	0	0	0
YDR545W	0	0	0	0	0	0	0	0	0	0	0	0	0	0	0	0	0	0	0	0	0	0	0	0	0	0	0	0	0	0	0	0	0	0	0	0	0	0	0	0	0	0	0	0	0	0	0	0
YEL001C	1219	1122	1200	1258	1109	1323	1104	1073	1327	1452	1348	1248	918	879	880	1231	1176	1130	1235	1049	1242	1236	1039	1202	529	503	1313	1183	1999	1127	1856	1555	1315	1295	1132	1668	1215	1222	1331	1087	1130	1161	1467	547	559	1215	1066	1169
YEL002C	1979	1896	1937	2243	1959	2491	1531	1666	1927	2487	2326	2231	1781	1645	1703	1877	1912	1718	2019	1634	1658	2078	1864	2002	904	892	2042	1888	3303	1669	2752	2444	2212	2003	1793	2473	1970	2051	2002	1931	2112	2087	2247	906	829	1979	1934	2017
YEL003W	423	413	415	403	394	444	440	415	516	508	522	493	370	398	329	408	389	375	432	383	429	411	343	425	126	105	328	418	723	392	631	581	472	444	429	605	373	426	444	418	477	456	533	145	166	436	458	348
YEL004W	111	112	106	102	95	97	94	92	84	157	153	147	80	97	85	106	128	119	115	86	95	172	166	167	27	27	55	103	230	86	164	153	133	137	111	154	112	127	134	77	91	113	123	38	40	93	88	88
YEL005C	76	67	73	93	74	80	48	55	70	82	71	61	58	64	83	79	58	63	91	76	89	131	101	108	22	13	48	66	141	70	122	61	85	70	86	116	58	64	75	77	43	65	74	39	20	72	59	57
YEL006W	253	237	238	253	243	263	209	175	253	377	393	339	212	173	223	314	335	300	244	189	189	253	231	225	99	81	243	197	357	178	369	297	234	236	218	304	249	251	248	271	251	244	245	111	94	260	248	236
YEL007W	662	615	624	946	910	1026	533	528	683	693	635	640	654	689	774	572	523	554	252	265	343	516	514	505	90	82	254	519	874	520	1154	717	524	651	606	766	557	637	679	1042	1012	1029	630	245	193	1126	995	868
YEL008C-A	6	6	6	2	7	4	11	4	4	10	6	11	5	4	4	5	7	5	10	11	13	11	10	8	1	2	13	5	10	6	10	6	5	4	6	9	5	5	7	5	3	5	3	1	0	2	2	1
YEL008W	1	1	2	3	3	6	0	1	2	0	3	2	0	2	1	3	1	2	1	0	2	1	2	3	0	0	2	0	2	2	3	2	1	2	2	3	0	2	0	2	1	2	1	0	0	2	0	3
YEL009C	8145	7831	8167	7804	6688	8253	7127	6599	9012	10215	10078	9823	6717	6806	7461	8840	8765	8541	6257	7137	7544	8223	7403	8246	3391	3527	8290	7655	11945	7210	12306	10137	8035	9041	8671	11051	8079	8998	8433	9097	8447	9622	7911	3419	3170	9507	8843	7816
YEL009C-A	2	2	2	4	2	5	1	0	1	4	2	3	2	1	0	2	2	2	1	4	2	1	0	1	0	0	3	0	8	1	3	0	3	0	2	2	2	1	1	2	0	2	2	1	1	3	1	0
YEL010W	2	1	2	0	0	0	0	0	0	0	0	1	0	0	0	0	0	0	1	1	1	0	0	0	0	0	0	0	0	0	0	0	0	0	0	0	0	0	0	10	12	7	0	0	0	20	9	15
YEL011W	68	52	54	92	55	64	44	35	45	92	79	81	44	59	27	88	84	57	116	79	74	44	41	69	15	9	40	26	100	34	119	62	54	40	29	64	35	54	58	26	43	37	206	29	38	32	26	63
YEL012W	40	37	38	66	76	62	46	43	37	61	31	46	39	41	34	33	38	28	44	35	43	53	57	54	12	12	36	15	54	18	31	21	43	20	13	34	22	19	20	42	52	46	60	15	19	56	45	57
YEL013W	1335	1238	1287	1617	1408	1613	1149	1193	1376	1663	1496	1377	1299	1217	1366	1342	1351	1286	1256	1082	1256	1314	1219	1255	532	484	1351	1193	1944	1142	2118	1495	1252	1400	1248	1663	1140	1298	1384	1289	1365	1360	1260	451	465	1454	1314	1163
YEL014C	0	0	0	0	0	0	0	2	0	0	1	0	0	0	0	0	0	0	0	0	0	1	0	0	0	0	0	0	0	0	1	0	0	0	0	0	0	0	0	0	0	0	0	0	0	0	0	0
YEL015W	744	659	683	885	787	784	715	576	818	825	728	668	706	606	754	916	921	791	587	580	649	607	650	658	253	281	755	592	923	637	1354	647	472	749	714	979	621	702	691	749	729	675	642	232	215	952	814	702
YEL016C	135	123	125	242	209	247	111	122	163	147	128	112	146	117	127	134	134	95	144	92	115	151	125	131	52	43	143	86	182	88	221	134	97	130	109	146	82	123	101	138	149	151	99	44	34	142	132	126
YEL017C-A	949	967	961	882	804	860	757	822	1048	1623	1311	1574	803	1017	832	1145	1219	1102	758	925	874	678	681	729	240	203	902	905	1651	1131	1547	1467	1202	1051	1246	1204	959	1067	987	791	929	935	1271	226	237	831	941	799
YEL017W	269	264	260	274	270	325	254	195	281	500	482	476	230	244	244	404	469	335	234	171	167	149	171	173	94	97	201	218	390	223	442	326	267	215	253	320	214	226	245	250	295	321	252	93	100	311	277	226
YEL018C-A	1	1	1	0	0	0	0	1	1	0	0	1	3	1	2	0	2	1	3	0	1	2	2	0	0	0	0	1	0	0	0	4	2	1	0	2	0	1	0	0	0	0	1	1	0	2	1	2
YEL018W	98	94	93	140	100	100	88	96	104	126	106	86	104	112	94	118	94	87	74	70	51	91	75	109	31	35	86	69	140	84	153	111	93	74	81	157	70	104	97	116	103	111	88	44	36	132	136	102
YEL019C	66	55	61	67	52	63	42	46	42	86	65	76	39	33	36	81	78	67	68	47	48	64	49	83	30	32	106	51	96	64	137	82	47	70	78	108	60	64	59	58	37	43	94	36	43	45	31	31
YEL020C	135	115	116	176	164	152	111	100	132	131	115	118	100	103	104	145	146	125	154	91	110	130	132	106	68	55	149	83	151	96	244	123	98	120	120	164	109	126	110	121	100	128	192	77	58	142	117	96
YEL020C-B	2	1	1	0	2	2	1	1	1	3	3	3	0	1	0	6	2	1	1	0	1	5	0	1	0	0	1	4	2	1	1	1	3	0	2	2	2	3	0	1	3	4	4	1	1	2	0	1
YEL020W-A	987	934	930	206	196	242	632	563	709	1104	941	1076	506	639	617	863	825	761	1421	928	1032	728	553	719	382	320	904	733	2120	707	1821	1525	1428	1129	1216	1502	1140	993	1149	1386	1407	1403	1304	462	387	1449	1325	1317
YEL021W	506	480	486	0	0	0	418	421	462	647	515	462	494	449	393	624	604	509	443	469	466	397	379	426	183	160	528	538	885	601	971	651	575	619	658	904	505	641	697	585	524	503	480	191	139	690	649	627
YEL022W	1533	1423	1451	2467	2325	2413	1213	1260	1480	2015	1809	1565	1316	1158	1569	1699	1825	1820	1443	1358	1492	1526	1575	1449	551	564	1679	1224	1909	1123	2389	1370	1020	1466	1402	1790	1176	1443	1261	1471	1344	1442	1315	543	489	1720	1459	1176
YEL023C	64	65	64	106	96	100	56	69	84	85	78	66	61	56	65	55	74	70	74	70	59	78	99	69	37	29	79	28	88	36	100	53	48	48	62	76	46	52	64	58	60	55	71	26	24	63	62	64
YEL024W	1412	1577	1353	348	327	323	758	815	1013	1466	1486	1466	879	998	1001	1066	1112	781	791	1517	1805	1703	1385	1518	622	771	1687	1048	4236	1028	3426	2880	1487	2133	2301	2602	2022	2203	2220	1333	1458	1466	2135	851	838	1453	1310	1063
YEL025C	398	376	381	531	457	470	327	341	394	520	522	541	359	354	455	475	553	493	426	309	386	542	537	498	158	181	463	308	457	276	554	388	199	326	315	447	294	392	337	311	320	286	467	166	169	368	347	300
YEL026W	3298	3301	3382	2699	2289	2975	3464	3158	4050	3670	3501	3446	3046	3535	3204	2903	3013	2773	2178	3223	2816	3159	2653	3169	1114	910	2854	3745	5470	4130	5281	4669	3731	3564	4081	5087	3758	3809	3712	3653	3837	3898	3742	1241	1103	3499	4130	3781
YEL027W	4328	4101	4241	4032	3880	4231	3990	3762	4823	5442	5378	4928	3840	3999	3546	4430	3919	3822	3686	3128	3176	4821	3794	4450	1913	1786	2981	4512	7260	4291	6657	5347	5459	4266	4414	6233	4454	4128	5374	3898	4448	4095	4674	2226	1998	4299	4042	4207
YEL028W	23	20	21	28	20	26	41	31	45	25	18	18	26	36	15	16	17	13	20	16	10	22	26	27	4	11	25	10	16	7	23	14	17	13	16	14	12	13	10	41	32	33	24	7	7	38	29	43
YEL029C	236	224	229	234	204	267	280	260	303	263	284	288	215	234	222	264	229	242	263	218	206	259	227	250	90	92	200	189	338	169	332	247	241	197	183	264	202	197	188	230	264	257	261	123	104	260	267	234
YEL030C-A	0	1	0	0	0	0	0	0	0	0	1	0	2	1	0	0	2	0	1	0	1	0	0	1	0	2	0	0	0	0	1	1	1	0	2	0	0	0	0	1	0	3	0	1	1	0	0	0
YEL030W	73	68	66	97	83	57	75	53	69	92	78	82	47	54	57	82	82	61	73	91	92	110	104	114	13	17	37	42	85	40	95	54	43	46	54	76	57	49	50	105	107	95	57	28	23	109	88	94
YEL031W	6246	6030	6259	6905	6264	7374	5184	5517	6704	8098	7972	7508	5833	5694	6332	5221	5694	6160	5622	4508	5166	5901	5592	5783	2408	2538	5854	6231	9993	5539	9084	7901	6777	6501	5826	7932	5588	6278	6339	7002	7788	7541	7140	2625	2728	6974	6263	6149
YEL032C-A	0	0	0	0	0	0	0	0	0	0	0	0	0	0	0	0	0	0	0	0	0	0	0	0	0	0	0	0	0	0	0	0	1	0	0	0	0	0	0	0	0	0	0	0	0	0	0	0
YEL032W	969	852	920	1349	1179	1249	728	803	939	1244	924	1060	811	766	964	1152	1236	1132	792	814	916	830	880	942	333	395	966	769	1110	788	1671	863	618	877	743	1085	744	732	873	1026	960	976	879	317	276	1330	1056	1013
YEL033W	7077	6942	7047	3330	3055	3781	7113	6745	8244	7936	8067	7560	7452	7976	7918	6397	6454	5668	6839	7189	7289	6625	5043	5643	3148	2736	6963	8064	12836	7849	10665	9238	7368	7293	7892	10052	7621	7721	7766	7988	8190	8900	7735	2821	2901	7956	8162	7799
YEL034C-A	16	14	14	8	12	12	16	9	23	22	18	23	7	15	18	11	15	2	9	7	17	16	5	12	13	5	10	24	22	20	19	25	16	16	23	13	12	10	12	19	10	20	13	9	4	28	19	15
YEL034W	26133	25580	26118	11786	11646	13798	26279	24855	30471	28374	28690	27579	28508	28548	29346	22571	22132	20145	24456	25953	26889	22405	18708	20038	11188	10260	24505	31932	45084	30125	40351	36367	28066	28813	29617	38407	28745	28170	31482	29020	32456	31768	25614	9367	9223	31960	31847	29930
YEL035C	0	1	1	0	0	1	1	0	0	1	0	1	0	0	1	1	1	2	1	0	0	2	2	3	0	0	3	0	2	0	0	1	0	0	2	0	0	0	0	0	1	0	1	0	0	0	1	2
YEL036C	1205	1060	1317	881	768	840	930	892	1151	1762	1428	1448	947	891	1019	1493	1383	1346	1049	971	1142	1003	996	1055	2073	1907	5540	932	1303	1065	1796	1120	737	1032	1022	1295	925	1035	945	1001	888	906	1081	360	384	1176	933	885
YEL037C	1210	1091	1251	1300	1301	1173	1068	937	1346	1496	1047	1105	1220	1137	1245	1541	1638	1360	960	995	1190	866	1052	1039	1241	1061	3474	797	1183	1114	2291	1113	842	1079	1202	1326	882	1087	984	1131	899	1025	830	369	376	1443	1337	1164
YEL038W	260	223	246	311	309	312	168	159	215	486	358	422	209	181	212	422	374	357	300	268	319	237	213	221	141	127	251	207	306	260	378	257	254	186	212	242	208	181	203	103	105	117	403	167	155	136	127	149
YEL039C	36	23	25	8	8	10	3	5	12	50	60	61	7	15	7	32	35	28	154	55	61	20	22	21	13	25	63	12	21	10	20	17	6	9	6	15	4	13	11	12	11	10	195	35	39	8	14	28
YEL040W	5899	5340	5677	3688	3157	3939	3899	4131	4425	3777	3859	3775	1569	1550	1635	3302	3132	3230	4410	4415	4383	3868	3960	4214	2218	2182	4808	10983	13796	10727	14843	10051	9575	9865	9391	12059	9288	8855	9524	4672	4486	4762	7313	2607	2721	4785	4522	5372
YEL041W	31	23	24	35	27	37	23	17	27	85	61	70	20	11	24	56	61	41	43	18	20	41	35	29	2	9	7	7	24	8	32	8	13	6	10	14	13	11	9	29	20	30	28	14	9	38	24	28
YEL042W	2031	1884	1950	2300	1956	2115	1788	1717	2162	2226	1865	1920	1995	1852	2044	1817	1764	1665	1966	1619	1959	1945	1878	1822	798	771	1831	2038	3172	1918	3213	2574	2078	2174	2144	2766	2083	2158	2174	1898	2031	2142	2133	863	845	2085	1897	1805
YEL043W	908	812	842	921	742	843	664	651	787	1035	1035	1033	610	608	685	922	881	834	883	774	913	922	884	938	356	346	908	861	1270	760	1514	957	791	979	879	1136	816	884	860	1053	1001	1052	946	308	275	1135	965	821
YEL044W	159	132	152	156	137	153	134	114	171	252	148	202	134	165	128	240	231	194	97	128	111	130	122	165	67	27	169	124	151	155	275	141	123	121	133	167	92	111	121	204	123	181	118	46	35	238	197	198
YEL045C	8	7	8	15	6	8	4	3	9	15	13	10	2	4	6	7	5	11	0	4	7	4	6	6	1	1	6	9	6	17	9	11	6	8	14	8	7	8	7	9	14	14	6	1	2	23	15	10
YEL046C	3825	3515	3774	4213	3690	4120	3227	3024	3691	4738	3621	4435	2961	3116	3472	3813	3702	3405	2351	2416	2700	3180	3519	4094	1572	1657	3524	3383	4847	3754	6126	4266	3555	3673	3866	4172	3048	3822	3584	5026	4702	5820	4557	1586	1782	5506	4887	4495
YEL047C	610	549	599	1012	914	1048	622	565	725	594	530	509	784	723	618	494	481	514	714	596	671	896	999	1067	262	271	603	432	555	510	701	501	524	378	367	465	309	377	351	512	510	472	879	286	288	565	553	613
YEL048C	88	87	80	83	73	63	69	66	67	165	172	159	65	50	55	136	119	118	66	84	80	64	61	72	30	36	55	96	131	81	150	113	77	90	111	100	66	100	83	73	84	85	84	26	23	86	77	75
YEL049W	0	1	0	1	2	0	0	0	0	3	2	1	0	2	0	1	1	1	1	0	2	1	0	0	0	0	0	0	0	0	0	1	0	0	0	0	0	0	0	0	0	0	0	0	0	0	0	0
YEL050C	754	686	661	419	303	355	297	328	419	789	748	664	374	357	380	733	686	508	1428	732	813	590	513	533	370	298	836	438	1383	376	1391	938	874	687	712	939	736	670	787	1062	1105	912	858	426	372	1142	1094	1149
YEL050W-A	1	1	0	0	0	0	0	0	0	2	1	0	0	0	0	1	0	0	0	1	0	0	2	0	0	0	1	2	0	1	1	1	0	3	1	1	0	0	0	0	0	0	0	0	0	0	2	0
YEL051W	1958	1896	1902	2418	2148	2416	1629	1612	1850	2486	2532	2237	1713	1836	1689	2066	2043	2036	1999	1786	1658	2123	1684	1910	640	723	1724	1739	3112	1652	2850	2313	2115	1732	1748	2478	1727	1751	1977	2046	2272	2006	2130	755	736	2078	2127	2044
YEL052W	324	317	320	554	553	620	177	199	223	394	374	316	180	202	220	309	319	256	497	471	486	302	250	294	167	209	416	186	433	215	491	352	282	258	274	333	271	273	303	339	344	335	372	147	137	358	352	358
YEL053C	650	575	611	630	497	563	528	521	615	695	598	550	544	501	517	614	647	631	811	650	643	525	494	512	332	296	786	554	943	559	1103	703	596	724	657	925	635	680	684	651	521	574	678	258	254	723	663	763
YEL053W-A	5	5	5	3	4	7	4	1	7	5	11	8	3	3	7	4	5	1	5	3	3	2	4	5	1	2	4	7	13	4	7	8	4	6	5	5	3	4	4	10	3	6	4	2	1	7	10	5
YEL054C	12976	12568	12908	9787	9089	10839	11961	11386	13791	12945	13442	12382	12821	13263	13175	11220	11586	10620	10155	11710	11733	10859	8755	10504	5009	4393	11535	16183	22843	15523	22011	17949	16288	15191	15417	19671	15310	14525	15124	13280	14273	14564	14036	5689	4976	13866	14196	12896
YEL055C	2983	2759	2884	3305	2756	3026	2522	2640	3037	3562	3221	2869	3006	2546	3052	3259	3416	3486	2440	2753	2908	2736	2712	2694	997	1034	2914	2977	4080	2843	4862	3077	2360	3434	3073	4213	2771	3155	3064	3072	2946	2927	2286	905	796	3519	3073	3074
YEL056W	340	313	309	430	360	385	327	349	321	378	403	314	330	287	362	385	412	322	295	295	333	273	230	264	135	123	354	242	462	259	588	317	290	299	310	416	307	334	317	371	319	305	323	142	110	423	345	283
YEL057C	13	11	12	8	7	11	51	50	47	17	13	24	15	8	7	22	21	16	13	7	16	5	6	12	2	4	6	6	6	0	10	5	4	9	6	12	14	14	12	7	7	3	11	10	4	9	4	5
YEL058W	830	779	832	1024	967	975	754	821	1007	897	605	696	704	711	671	782	787	672	905	696	792	575	733	667	446	304	1024	615	1179	836	1439	995	824	715	815	894	671	803	819	1037	930	982	643	246	210	1248	1091	1415
YEL059C-A	16	11	14	8	11	10	24	15	12	54	17	39	4	1	1	34	22	40	10	2	11	18	22	25	4	3	15	5	11	9	22	12	8	6	7	6	3	9	7	15	16	11	17	5	2	18	11	21
YEL059W	0	0	0	0	2	0	0	0	0	1	0	0	0	1	0	0	0	0	0	0	1	1	0	0	0	0	1	0	1	0	1	1	0	0	1	0	0	0	2	1	0	1	0	0	0	0	1	0
YEL060C	565	510	499	962	949	689	468	532	626	553	368	508	507	696	639	520	588	392	464	419	514	299	366	373	144	183	386	386	774	466	1306	480	385	398	406	471	346	377	372	727	621	670	467	189	195	933	706	793
YEL061C	473	420	423	749	628	564	428	352	506	584	489	505	455	317	408	568	642	570	442	370	445	397	396	424	136	144	442	274	544	322	856	424	355	443	453	516	374	509	351	427	457	444	472	154	164	489	422	335
YEL062W	194	178	189	196	183	209	149	152	196	216	205	165	173	180	206	203	183	218	212	145	181	261	219	240	71	74	237	136	286	138	293	174	125	199	181	255	178	180	182	192	198	199	220	95	81	208	217	204
YEL063C	1076	978	1040	1118	1019	1193	917	916	1066	1144	1127	1069	949	835	1067	952	962	942	1071	920	1045	1296	1172	1331	411	416	1037	1049	1587	923	1544	1072	952	1071	936	1262	943	987	989	1182	1198	1165	1333	483	510	1160	1043	1046
YEL064C	113	107	111	135	107	123	81	90	127	145	129	130	111	98	89	105	140	111	141	96	125	157	125	91	45	37	106	75	203	73	127	109	125	90	93	124	95	93	113	126	126	141	161	61	67	107	98	116
YEL065W	1168	1323	1017	1092	768	1127	555	1026	975	2062	1191	1303	529	223	168	866	1135	840	883	387	425	2109	2177	1959	135	105	363	837	2314	641	1985	1658	828	1117	1441	1765	794	1474	1447	2197	2519	2414	203	174	170	2162	3258	831
YEL066W	111	109	112	115	130	114	111	99	161	156	101	123	148	140	139	121	124	82	135	86	111	85	96	122	24	31	54	66	153	105	190	158	106	76	115	103	101	97	113	109	128	133	103	56	43	118	124	167
YEL067C	19	16	16	12	6	8	16	14	17	31	14	21	18	14	14	26	23	20	14	7	4	28	17	19	2	4	15	8	18	9	18	10	12	22	17	18	18	18	18	35	28	28	10	8	8	28	43	26
YEL068C	64	60	61	88	85	78	53	68	59	113	98	97	39	50	47	88	95	67	77	58	71	70	67	64	35	22	83	30	74	42	75	43	52	53	45	63	47	49	52	57	55	55	95	32	39	45	64	43
YEL069C	2	2	3	0	0	0	1	0	0	1	0	1	0	0	2	1	0	0	0	3	2	1	0	0	3	5	7	3	11	2	8	8	8	1	4	6	4	0	5	4	1	2	0	0	1	1	1	2
YEL070W	4	4	4	3	5	3	5	0	6	4	3	3	15	16	14	0	4	0	3	8	5	2	2	0	1	0	2	4	8	7	6	2	8	5	6	3	5	4	3	2	0	0	2	3	1	0	2	0
YEL071W	2224	2086	2094	3405	3023	3078	2617	2651	3146	1123	1080	1045	2535	2438	3089	1082	979	748	5616	4702	5296	1548	1681	1471	498	489	1438	1682	2747	1879	3360	2241	1822	1892	2459	2531	1867	2085	1855	1544	1860	1740	2530	1030	826	2057	1823	1443
YEL072W	47	44	46	68	66	75	51	44	63	35	37	33	52	55	52	29	18	28	88	65	86	54	33	35	13	10	32	44	74	33	48	39	52	35	54	53	30	39	48	49	48	44	73	24	22	40	55	32
YEL073C	8	5	4	5	3	3	0	3	3	41	23	27	1	1	1	13	11	8	0	1	1	0	9	0	0	0	0	0	7	0	4	2	3	1	1	5	2	2	2	2	2	0	37	8	7	8	2	5
YEL074W	2	1	1	4	2	2	0	0	0	0	0	0	0	0	0	0	0	0	0	0	0	2	0	1	0	0	0	1	2	1	1	0	0	1	1	2	3	0	0	12	6	1	0	0	0	3	3	6
YEL075C	1	1	1	3	4	4	0	0	0	0	0	0	0	0	0	0	0	0	0	0	0	0	0	0	0	0	0	0	0	0	0	0	0	0	0	0	0	0	0	5	8	7	0	0	0	9	4	6
YEL075W-A	0	0	0	1	0	1	0	0	0	0	0	0	0	0	0	0	0	0	0	0	0	0	0	0	0	0	0	0	0	0	0	0	0	0	0	0	0	0	0	2	0	0	0	0	0	1	0	0
YEL076C	0	0	0	0	0	0	0	0	0	0	0	0	0	0	0	0	0	0	0	0	0	0	0	0	0	0	0	0	0	0	0	0	0	0	0	0	0	0	0	0	0	2	0	0	0	0	0	0
YEL076C-A	0	0	0	0	0	0	0	0	0	0	0	0	0	0	0	0	0	0	0	0	0	0	0	0	0	0	0	0	0	0	0	0	0	0	0	0	0	0	0	0	0	0	0	0	0	0	0	0
YEL077C	43	37	37	53	29	38	1	3	2	45	38	45	5	4	7	47	47	35	101	76	93	19	27	33	5	10	25	24	48	35	99	76	22	41	39	42	47	43	49	58	51	40	53	20	15	54	48	74
YEL077W-A	0	0	0	0	0	0	0	0	0	0	0	0	0	0	0	0	0	0	0	0	0	0	0	0	0	0	0	0	0	0	0	0	0	0	0	0	0	0	0	0	0	0	0	0	0	0	0	0
YER001W	1868	1743	1755	2153	1862	2224	2103	2190	2207	2616	2375	2131	2762	1826	1807	2073	2017	1912	1308	1549	1845	1198	1229	1185	1035	972	2512	1169	2728	1269	2925	1768	1503	1791	1934	2256	1560	1981	1753	1679	1695	1457	1954	709	698	1688	1306	1573
YER002W	489	479	475	435	338	441	361	423	411	643	445	413	427	484	401	590	514	450	439	473	359	408	370	438	219	158	474	445	743	422	747	737	527	587	535	830	440	602	636	471	567	547	458	138	131	669	653	650
YER003C	1879	1705	1733	2832	2447	2478	1574	1457	1885	2028	1961	1890	1621	1495	1497	2043	1937	1644	1699	1484	1664	1245	1123	1109	582	581	1638	1598	2813	1647	3484	2179	1855	1905	1928	2383	1722	1762	1860	1831	1912	1978	1872	663	622	2148	1826	1845
YER004W	246	241	247	363	370	394	201	223	272	220	147	147	268	317	295	151	130	143	292	197	230	295	289	331	164	173	302	140	312	137	339	233	199	120	213	254	147	209	201	327	336	336	315	127	142	344	336	329
YER005W	518	478	482	501	448	484	392	433	526	732	615	534	429	409	438	545	588	515	499	449	487	506	461	433	240	240	567	440	741	467	796	548	457	573	508	717	474	515	474	517	483	487	536	242	198	595	491	450
YER006C-A	0	1	1	2	1	0	0	1	0	0	2	2	0	1	0	0	0	2	1	0	0	1	1	0	0	0	0	0	1	0	0	0	0	0	0	2	2	0	0	0	2	1	1	0	0	0	2	1
YER006W	2335	2134	2198	2150	1780	1816	1995	1925	2137	2882	2307	2097	2329	2048	2203	2738	2703	2907	1808	2270	2262	2279	2267	2268	978	824	2267	2087	3138	2216	3886	2349	1873	2879	2601	3369	2325	2452	2453	2229	2061	2022	1841	795	701	2618	2490	2374
YER007C-A	905	881	907	896	777	876	846	863	1052	1043	984	981	735	829	692	844	909	831	732	821	817	941	854	961	386	293	834	944	1561	901	1508	1155	1110	997	1014	1283	958	942	957	884	914	1014	880	314	291	980	983	1004
YER007W	69	62	67	69	51	61	49	47	62	90	75	76	68	58	61	78	72	69	73	65	56	79	62	80	30	20	61	42	98	40	109	81	89	67	66	105	58	72	74	83	56	63	62	33	24	75	77	85
YER008C	1024	934	986	1346	1170	1299	780	821	968	1237	1072	1083	914	911	1001	977	1025	922	915	815	881	1049	1018	1067	364	360	1115	939	1366	809	1581	1051	950	1028	853	1245	779	995	912	1223	1163	1147	1011	340	381	1222	1051	1008
YER009W	2845	2691	2828	2639	2271	2764	2597	2328	3003	3338	2923	3106	2545	2766	2464	2733	2669	2464	2342	2517	2581	2794	2078	2648	1362	1021	2906	2933	4640	2823	4343	3714	3408	3002	3166	3898	2969	2997	3174	2794	3131	3085	3352	1145	1101	2927	2994	2994
YER010C	129	127	128	169	150	171	124	110	148	174	182	186	132	143	158	131	141	120	145	132	133	123	132	108	45	54	101	62	162	73	144	116	95	92	105	134	78	89	104	168	165	152	184	67	58	171	157	177
YER011W	122	97	128	111	141	145	29	54	31	14	11	24	106	154	121	12	8	20	911	808	971	16	24	20	58	21	120	81	25	54	31	36	142	44	15	37	26	28	18	37	40	49	334	63	79	18	29	84
YER012W	969	913	930	1336	1208	1293	933	963	1164	944	967	936	1082	995	1116	852	869	630	1071	693	891	1127	897	994	390	456	906	804	1410	657	1100	928	827	710	728	980	724	749	758	1150	1296	1200	1130	385	502	1188	1155	1100
YER013W	328	296	306	482	399	429	231	212	329	443	396	336	275	229	285	385	442	359	384	313	325	383	334	349	121	144	440	192	392	238	514	296	226	295	278	326	240	285	289	321	292	280	311	122	98	341	308	286
YER014C-A	1	1	0	0	0	0	1	1	0	0	1	1	1	1	0	1	0	2	1	1	0	2	0	2	0	0	1	1	1	0	0	0	0	0	2	0	1	0	0	0	0	1	0	0	0	0	1	0
YER014W	238	213	224	404	324	362	149	148	187	318	334	243	185	185	171	269	262	290	342	233	296	219	219	200	105	99	279	167	333	140	361	178	243	171	191	235	173	168	167	236	214	176	247	88	79	228	218	294
YER015W	58	47	47	95	71	67	32	38	48	77	52	57	28	39	41	72	53	37	57	46	56	58	60	51	26	27	57	37	74	37	100	48	50	43	45	52	45	50	36	52	44	50	69	19	16	73	38	48
YER016W	225	218	208	265	246	248	153	167	235	288	228	210	230	211	173	237	271	217	227	180	204	207	176	206	92	89	237	167	365	161	372	292	225	225	236	288	194	255	244	251	223	201	223	81	69	240	243	205
YER017C	856	752	755	848	739	694	594	643	815	992	885	833	656	582	692	937	938	742	1005	721	959	798	805	757	350	362	935	469	1191	508	1664	788	569	798	755	1069	698	715	676	965	789	869	911	404	381	1159	967	830
YER018C	28	21	21	39	55	28	13	9	22	48	20	41	11	14	14	68	66	37	18	15	9	7	13	25	14	11	19	9	16	26	102	30	19	7	18	8	9	18	11	20	13	24	27	6	13	34	18	22
YER019C-A	925	891	914	865	777	918	830	752	1001	1159	1067	1057	770	939	784	873	851	789	897	796	911	1005	883	889	297	260	748	878	1410	957	1522	1268	1147	968	1081	1279	907	949	1025	874	1007	924	1146	337	340	880	990	946
YER019W	244	208	222	385	350	329	181	204	243	224	137	228	218	193	166	211	186	187	202	168	189	158	217	236	118	84	221	200	258	208	493	316	256	206	227	215	189	236	212	292	200	301	272	92	73	306	247	261
YER020W	264	241	234	339	368	303	256	285	328	281	201	225	233	269	237	260	278	230	248	237	251	178	258	270	71	69	231	123	338	172	620	243	182	255	256	258	209	240	232	300	183	217	232	96	65	360	294	303
YER021W	1719	1611	1680	2369	2054	2301	1512	1534	1826	1700	1731	1414	1673	1471	1761	1492	1467	1157	1949	1499	1829	2159	1938	2064	698	770	2106	1360	2566	1428	2462	1691	1421	1620	1527	2228	1323	1557	1646	1710	1764	1740	1738	745	712	2022	1854	1573
YER022W	472	433	454	487	446	535	363	371	456	549	503	447	407	385	449	466	487	383	468	413	472	546	521	550	170	211	570	382	691	417	785	418	372	509	470	666	451	467	473	479	417	411	494	197	207	519	499	405
YER023C-A	0	0	0	0	1	0	0	1	0	0	0	1	0	0	0	0	1	0	1	0	0	0	1	1	0	1	0	0	0	0	1	1	0	1	0	0	0	0	1	0	0	0	1	0	0	0	0	0
YER023W	1237	1120	1140	1950	1717	1683	987	889	1144	1560	1424	1354	913	937	1007	1372	1413	1230	1263	943	1041	829	818	844	445	407	1089	1089	1829	1168	2327	1485	1261	1181	1188	1561	1085	1118	1256	1008	1024	978	1315	459	458	1225	1143	1030
YER024W	132	125	133	176	157	169	135	115	161	168	152	141	102	120	124	143	142	128	124	112	139	186	174	172	77	96	201	81	155	101	191	95	94	92	80	128	92	124	104	135	148	126	124	59	53	152	144	147
YER025W	4522	4230	4399	4618	4114	4717	3826	3965	4561	5346	4855	4170	3879	3724	4172	4778	4932	4703	3838	4030	4104	4158	3903	4267	1760	1554	4529	4387	6677	4446	7622	5176	4278	5233	4934	6622	4471	4859	4989	4598	4133	4283	4201	1800	1565	5122	4794	4575
YER026C	699	694	654	852	754	912	396	442	550	703	725	702	502	603	550	558	549	474	920	654	657	903	788	755	305	379	734	432	1216	410	919	827	565	664	668	837	623	688	681	799	857	874	1113	400	418	797	854	686
YER027C	413	378	382	546	562	509	407	366	450	422	374	363	427	387	414	441	460	339	368	337	401	357	345	366	126	99	311	288	530	322	789	395	316	380	385	507	322	375	344	418	443	439	318	137	137	580	482	511
YER028C	96	83	86	183	148	118	79	71	86	115	112	99	30	20	33	147	125	142	112	90	66	222	225	230	29	37	76	79	94	91	36	12	25	70	79	121	77	71	85	63	51	44	128	41	38	75	65	30
YER029C	179	161	168	176	141	136	164	137	166	211	167	160	187	179	144	214	176	156	167	160	204	204	177	195	92	77	178	139	260	146	294	170	174	166	151	242	150	201	180	161	164	176	175	62	76	190	197	181
YER030W	282	270	270	408	393	396	151	146	227	409	369	329	178	150	145	344	285	258	309	241	258	330	259	293	96	99	230	243	481	252	443	449	407	324	287	386	252	306	317	208	294	233	296	67	108	232	224	205
YER031C	386	367	381	564	485	582	298	305	407	509	368	313	404	414	427	416	409	328	318	313	328	327	312	353	148	112	349	252	526	300	567	504	398	345	389	526	364	414	455	389	351	368	414	169	130	482	428	451
YER032W	353	316	318	455	417	379	321	285	353	424	406	353	316	269	346	357	441	332	333	277	297	324	312	330	128	139	360	332	442	294	576	372	280	351	331	410	335	341	300	340	314	337	375	121	158	328	275	234
YER033C	134	120	135	220	216	231	128	143	186	139	155	151	128	133	163	122	130	105	294	159	233	224	200	199	68	79	223	72	130	77	123	69	69	77	71	79	58	64	59	84	96	96	163	63	46	106	88	114
YER034W	48	45	47	88	73	66	50	46	82	85	60	67	51	91	61	76	60	56	47	43	38	33	31	40	12	13	31	23	34	48	64	39	25	43	48	47	22	34	32	37	37	34	51	15	14	45	49	58
YER035W	82	68	78	179	157	171	66	61	82	95	74	76	38	67	52	105	91	83	97	52	88	52	74	99	41	45	125	33	74	52	132	50	48	45	59	40	41	45	45	90	47	75	104	31	35	112	98	103
YER036C	7904	7342	7650	7452	6764	7374	7426	7040	8229	8539	7749	7293	7103	6680	7399	8181	8254	7871	6657	7927	8120	7189	6917	7111	3167	2850	7563	8538	11748	8929	14092	8925	7730	9164	8781	11087	8037	8575	8486	7404	6907	7251	6869	2828	2527	8748	8192	7776
YER037W	30	32	31	131	138	141	9	17	12	22	23	25	3	54	12	18	15	28	23	14	14	15	19	23	2	5	10	9	86	8	42	25	21	21	14	20	25	23	39	25	15	29	65	13	11	40	25	74
YER038C	124	116	113	134	111	140	109	113	101	155	159	129	99	115	107	154	133	137	106	103	99	180	150	148	52	57	116	99	202	92	173	125	100	138	101	146	102	110	107	109	111	118	131	50	51	120	96	97
YER038W-A	9	8	7	5	11	6	8	5	6	18	9	2	8	8	9	7	10	13	4	10	3	17	8	13	3	3	7	8	8	6	14	10	6	11	10	11	7	7	7	10	6	3	10	5	0	11	9	10
YER039C	19	19	20	17	16	19	11	12	14	22	15	15	11	13	16	20	18	12	26	13	16	24	38	29	19	16	44	8	37	14	26	27	28	16	24	28	28	22	20	16	14	19	22	7	9	20	10	14
YER039C-A	6	5	6	5	4	7	5	2	8	4	6	3	2	4	2	4	3	7	7	3	3	16	8	14	6	6	11	3	12	9	5	5	5	8	5	7	3	5	8	3	3	1	9	4	5	5	6	4
YER040W	201	175	194	308	276	288	171	148	230	230	218	238	212	184	247	201	233	182	188	150	175	209	185	210	85	91	243	177	197	168	314	160	139	173	178	225	133	167	158	201	179	181	189	78	65	224	180	166
YER041W	142	126	127	239	185	185	150	150	197	190	162	153	123	131	146	194	176	137	145	118	140	156	172	175	35	46	101	89	166	86	230	99	83	111	123	130	105	71	102	111	119	124	128	44	47	124	128	97
YER042W	410	391	376	337	255	291	330	370	456	339	256	256	456	448	484	272	297	235	439	468	606	285	241	250	151	178	334	412	656	377	678	507	355	333	447	468	368	420	410	454	589	532	679	193	205	623	533	388
YER043C	15993	15555	16201	11004	9854	12173	12556	12258	14626	21638	22280	22024	13698	14179	14514	17009	17221	17634	14666	14774	15306	12123	11793	12450	6048	6230	14092	16387	24129	16843	23807	19522	16095	17379	16418	20462	15607	15724	16888	21547	21886	22483	15618	6034	5684	20811	21020	21747
YER044C	1393	1285	1374	301	310	289	1563	1421	1655	2645	2981	2773	1593	1691	1591	2100	1991	2127	1339	721	821	1202	971	1166	211	268	509	1497	1723	1330	1592	1475	1485	1319	1074	1671	1227	979	1322	1727	1803	1707	1110	350	347	1472	1523	1821
YER044C-A	8	9	9	13	13	20	15	11	16	13	23	9	7	14	11	7	18	11	11	5	11	12	21	20	4	2	8	4	7	4	5	4	4	5	3	10	5	5	7	0	3	5	8	4	0	4	6	6
YER045C	200	161	191	157	134	178	289	297	300	138	134	121	262	308	234	103	87	126	586	246	228	146	138	158	193	186	389	157	223	142	259	142	213	123	81	150	107	119	118	172	118	131	162	67	40	149	129	330
YER046W	37	36	33	43	48	48	47	46	44	40	41	46	33	50	24	41	51	31	57	44	69	42	31	38	15	12	35	22	31	12	43	34	29	19	20	20	23	22	31	39	54	30	44	10	6	40	42	35
YER046W-A	2	1	1	2	0	1	1	0	3	6	5	2	1	1	1	5	3	2	1	1	2	7	1	2	3	0	4	0	1	0	2	2	2	0	0	0	0	0	1	2	4	1	0	0	0	1	1	0
YER047C	245	217	230	238	246	271	172	180	210	354	273	282	238	197	234	322	321	325	242	235	257	199	184	178	106	90	258	172	275	187	393	250	199	255	214	321	197	241	233	234	241	194	268	76	69	290	226	237
YER048C	871	851	854	1036	936	1046	659	703	815	899	833	803	753	817	729	810	743	672	905	778	945	967	870	926	354	354	793	791	1459	749	1408	1123	875	933	939	1288	893	950	977	927	943	916	794	319	322	936	999	947
YER048W-A	453	425	425	320	342	336	360	357	453	649	525	540	368	330	383	457	481	426	484	278	333	543	378	440	123	115	335	392	833	318	699	583	523	484	460	613	420	451	489	479	583	495	543	186	163	480	468	523
YER049W	3573	3387	3494	2389	2004	2173	2666	2814	3111	4216	4158	3516	2128	2094	2230	3624	3632	3692	3402	3612	3466	4720	4151	4683	1456	1489	3545	3704	5203	3413	4975	3746	3147	3716	3360	4860	3387	3609	3663	5210	4858	4964	2767	1097	931	5236	4975	5017
YER050C	310	299	292	267	257	236	200	187	250	328	350	302	239	264	234	256	253	221	551	317	345	299	255	300	137	145	350	178	602	178	476	349	353	267	297	408	291	263	312	360	440	366	409	149	144	390	353	386
YER051W	120	116	113	177	128	179	104	106	119	131	144	123	107	98	104	120	127	121	135	105	108	147	148	132	60	71	135	82	183	88	180	138	95	112	85	148	96	113	107	75	102	85	190	83	67	89	102	80
YER052C	1968	1841	1938	1861	1687	1952	1744	1716	2045	1921	1823	1755	1895	1805	1982	1430	1582	1495	1590	1467	1628	2650	2483	2574	702	724	1673	2108	2612	2089	2778	2054	1924	1810	1764	2260	1623	1862	1852	2790	2848	2757	1840	590	651	2771	2596	2432
YER053C	135	117	110	107	141	107	101	132	145	166	167	149	102	185	108	144	149	194	279	78	91	75	82	108	20	18	62	52	245	62	217	105	80	100	93	89	76	106	125	126	104	92	332	52	51	128	102	193
YER053C-A	543	541	455	7	2	6	195	225	341	1022	913	986	106	136	143	687	728	565	1158	560	553	453	344	398	152	281	622	418	1405	386	1023	860	182	563	736	773	505	703	719	573	582	577	696	141	172	581	501	405
YER054C	12	11	12	23	19	20	10	13	8	30	20	24	18	13	14	21	25	28	13	6	10	10	19	19	3	7	12	3	5	4	14	5	6	2	0	6	2	11	6	8	10	11	13	9	6	8	7	9
YER055C	2579	2262	2289	4356	4016	3966	2808	2423	3173	2462	2222	2192	3309	2972	3085	2841	2993	2372	1235	1572	1885	1618	1362	1628	825	765	2064	1756	2201	1855	3527	1733	1397	1611	1661	2079	1490	1578	1657	3530	3401	3040	3595	1373	1192	3716	3659	2756
YER056C	3915	3566	3795	3393	2659	3092	3431	3122	3827	4531	3750	3320	3621	3022	2998	3278	3035	3217	2560	2499	2810	3178	3091	3527	1470	1366	2774	5116	6031	4766	6334	5106	4510	4560	4821	6575	4040	4871	5400	4692	4814	4223	3764	1265	1239	4760	4038	4647
YER056C-A	8493	8021	8412	7704	7136	8519	7833	7142	8991	9801	9949	9346	7973	8251	8214	8422	7899	7333	6654	7466	8280	7878	5666	7248	3146	2893	7634	10320	14972	8939	13964	11514	10559	10498	9853	13921	10249	9484	10472	6715	7257	7160	9124	3631	3028	7120	7204	6530
YER057C	592	566	582	844	746	892	613	638	796	657	640	611	716	755	692	514	483	434	533	394	437	633	479	582	130	148	239	438	946	432	795	668	690	529	543	694	524	513	576	598	675	689	780	261	302	571	607	658
YER058W	50	38	40	40	38	27	28	24	25	51	42	46	27	27	28	47	26	38	131	22	46	37	38	38	36	18	59	23	81	21	66	56	57	38	44	49	34	39	34	60	59	51	65	19	23	63	44	53
YER059W	265	264	270	278	314	343	249	249	340	260	276	262	223	266	231	234	243	233	315	239	273	263	281	284	124	131	312	210	473	233	475	270	276	268	287	361	244	274	271	254	244	284	295	128	100	285	290	253
YER060W	531	411	410	223	195	221	359	354	369	458	419	423	252	253	287	355	382	375	735	780	741	238	269	242	66	100	149	234	363	233	337	304	242	208	230	267	190	202	216	557	605	636	3173	1165	1217	573	540	533
YER060W-A	60	43	42	14	17	11	15	13	26	18	25	14	11	17	17	18	16	17	28	20	23	28	16	26	4	4	9	55	56	44	61	58	33	56	53	71	35	32	53	77	82	77	391	150	139	88	83	72
YER061C	179	153	149	222	202	217	168	168	175	182	186	162	242	169	151	144	183	164	102	108	168	166	142	149	51	51	131	133	245	95	331	163	121	159	170	248	131	174	173	109	84	64	430	155	114	111	91	107
YER062C	220	173	164	599	461	382	94	111	103	315	309	244	69	74	66	261	195	138	676	157	204	188	202	196	137	164	355	42	299	80	182	130	155	84	110	121	90	85	86	79	86	60	400	151	154	91	62	122
YER063W	333	309	319	487	443	489	323	281	345	425	420	346	341	368	351	438	380	323	338	238	291	329	283	328	125	123	341	189	451	235	510	330	326	238	284	413	252	254	292	302	284	249	337	125	134	364	364	326
YER064C	556	462	480	873	784	703	451	339	571	712	611	559	464	377	538	714	751	589	389	276	398	512	385	418	153	157	410	398	689	456	1068	437	389	463	487	595	405	429	402	514	459	487	535	216	194	696	535	488
YER065C	63	57	62	99	87	113	78	59	94	94	64	75	65	57	54	97	99	70	58	67	89	58	75	60	18	42	48	32	60	73	87	47	27	38	34	49	41	41	50	49	37	44	63	38	32	64	53	45
YER066C-A	0	0	0	2	0	3	0	0	0	0	1	1	0	0	0	0	1	0	0	0	0	0	1	0	1	0	0	0	0	0	0	0	0	0	0	0	0	1	0	0	0	0	0	0	0	1	0	0
YER066W	18	17	15	30	20	19	8	23	18	33	17	22	12	8	8	23	29	21	20	14	17	26	31	19	10	18	15	14	21	8	28	16	15	12	14	14	10	9	9	13	17	9	13	11	7	13	14	24
YER067C-A	0	0	0	1	0	4	0	0	0	0	1	0	0	0	0	0	0	0	0	1	0	0	2	0	0	0	0	0	1	0	0	0	1	0	0	0	0	0	0	0	0	0	0	0	0	0	0	0
YER067W	15	14	11	56	46	30	16	18	17	5	7	4	13	42	12	8	3	3	19	10	10	6	8	9	0	2	5	3	28	3	13	6	12	5	5	6	9	6	9	10	14	15	44	4	3	12	9	20
YER068C-A	0	0	0	0	0	0	0	1	0	0	0	0	1	0	1	0	0	0	0	0	0	1	0	0	0	0	0	0	2	0	1	0	0	1	0	0	0	0	0	0	0	0	1	0	0	0	0	2
YER068W	486	451	469	568	540	550	420	397	511	579	556	461	473	429	505	485	494	501	426	454	509	475	513	470	176	153	485	381	646	448	730	460	344	561	493	656	461	476	449	576	475	500	421	157	141	555	517	504
YER069W	862	777	808	740	698	742	698	663	860	1004	892	816	524	451	624	864	892	817	182	338	368	938	884	926	191	141	478	362	537	401	724	484	299	370	354	501	305	407	378	2196	2062	2040	1429	651	521	2397	2195	2349
YER070W	4405	4105	4177	6042	5150	6053	3966	4273	5039	5309	4517	4671	4483	3819	3574	4229	4488	3790	3336	2929	3588	3619	4068	3993	1962	1856	4686	3263	5246	2990	6732	4367	3962	3724	3872	4764	3347	4288	3841	5827	6048	5817	4477	1713	1730	5764	4943	4155
YER071C	95	85	86	114	84	98	79	72	91	98	76	83	94	109	94	99	63	51	129	90	95	120	97	120	27	29	49	71	137	55	107	86	83	63	79	106	69	55	68	109	141	119	131	41	40	122	115	140
YER072W	1312	1268	1315	4107	3896	4337	1245	1376	1617	1337	1133	1088	1249	1137	1087	1108	1089	916	781	995	1087	887	752	809	422	414	1127	1096	1647	1149	1712	1397	1136	1064	1198	1522	986	1069	1162	1249	1232	1139	1082	354	313	1360	1330	1229
YER073W	1112	1029	998	3063	2990	2836	565	499	588	1163	957	902	626	612	647	1011	1008	869	666	596	757	986	1035	982	229	259	538	884	1298	977	1654	1014	793	967	1009	1166	747	885	910	1623	1452	1453	688	270	274	1806	1544	1271
YER074W	9172	9010	9183	7745	7138	7605	7945	7305	9084	10256	9206	9867	8055	9274	7652	8582	8059	6550	7279	8238	8133	7234	5851	7344	3633	3101	7936	10089	16358	11166	17499	14072	13647	9860	12091	14548	10568	10113	11911	8247	10300	9584	11292	3656	3387	9302	10384	9327
YER074W-A	231	223	229	271	284	309	215	178	297	305	312	274	211	220	200	256	239	185	192	186	185	229	144	199	102	55	193	166	394	181	282	260	293	233	249	319	206	208	243	225	275	241	337	90	80	238	253	240
YER075C	396	360	355	429	355	356	417	387	456	464	420	386	298	284	384	405	411	372	376	312	392	384	338	313	165	159	453	352	562	344	751	447	292	331	391	493	334	402	394	394	416	331	377	142	123	462	372	238
YER076C	54	50	52	91	88	81	49	51	57	97	71	75	103	98	85	64	89	64	54	40	54	37	48	52	20	17	50	21	43	24	53	33	28	19	22	36	37	22	33	55	56	57	59	15	24	53	63	55
YER076W-A	3	4	3	5	8	8	0	1	1	6	2	4	2	13	5	5	2	2	2	2	5	0	5	4	2	0	2	5	3	0	3	7	2	2	4	2	2	2	2	4	5	1	1	0	0	3	1	3
YER077C	318	296	303	283	260	245	262	301	297	338	300	253	282	305	287	304	341	259	370	307	348	367	328	339	161	121	407	153	393	169	445	275	254	286	265	366	249	234	278	434	403	415	339	145	143	497	459	482
YER078C	341	305	305	372	325	353	327	322	351	372	342	320	337	320	337	406	442	319	317	301	315	364	337	353	95	90	257	212	420	213	601	294	268	325	279	410	244	277	268	403	308	295	338	145	140	397	373	383
YER078W-A	0	0	0	2	0	0	0	0	0	0	0	0	1	1	0	0	1	0	0	0	0	0	0	0	0	0	1	0	0	0	0	0	1	0	0	0	0	0	0	0	0	0	0	0	0	0	0	0
YER079C-A	0	0	0	0	0	1	0	0	0	0	0	0	0	0	0	0	0	0	0	0	0	0	0	0	0	0	0	0	0	0	0	0	0	0	0	1	0	0	0	0	1	1	0	0	0	0	1	0
YER079W	22	22	23	53	58	58	11	18	19	33	30	21	19	20	18	25	25	23	29	24	28	24	16	21	6	10	58	1	42	11	35	24	13	21	9	19	11	14	20	13	14	8	42	10	13	10	10	14
YER080W	740	624	625	1426	1297	1252	618	558	708	702	650	605	650	535	740	748	653	516	934	543	648	618	622	628	132	187	539	389	931	417	1379	547	420	567	539	729	474	594	575	765	674	668	775	312	331	927	714	595
YER081W	422	378	420	400	429	457	320	280	420	481	415	357	371	330	312	410	403	476	299	287	266	1288	1003	1401	112	115	258	314	449	306	448	302	249	364	368	467	363	365	323	379	377	391	401	142	124	387	399	487
YER082C	1307	1141	1202	1205	970	1060	1141	1086	1229	1436	1177	1056	1198	1012	1191	1443	1443	1292	1112	1308	1318	1138	1208	1205	459	406	1198	1059	1656	1215	2395	1214	943	1650	1420	1948	1318	1342	1370	1397	1089	1188	1006	416	367	1643	1370	1444
YER083C	405	375	390	478	449	539	358	351	422	489	367	384	417	392	415	383	380	353	340	294	335	349	363	392	145	135	295	338	564	368	673	503	443	396	427	490	360	402	399	425	426	436	491	147	165	439	429	419
YER084W	2	2	2	2	6	4	2	4	5	3	5	2	1	4	3	5	2	2	1	0	1	3	3	3	1	0	0	1	2	2	2	2	2	2	0	2	5	1	0	0	0	1	5	1	1	0	1	0
YER084W-A	0	0	0	0	0	0	0	0	0	0	0	0	0	0	0	0	1	0	0	0	1	1	0	1	0	0	1	0	0	0	0	1	0	0	1	0	0	0	0	0	0	0	0	0	0	1	0	0
YER085C	1	2	1	2	6	0	1	0	2	2	2	2	0	1	2	3	2	2	1	2	2	3	1	0	0	0	2	0	0	2	1	3	0	2	5	2	2	2	3	1	1	0	1	1	0	3	0	2
YER086W	2671	2558	2687	2449	2320	2796	2427	2501	2902	3563	3065	3003	2504	2639	2650	2452	2648	2500	2297	2309	2400	3087	2930	3229	1150	1011	2569	2884	3792	2681	3871	3212	2697	2565	2581	3520	2445	2713	2791	2708	2884	2763	2936	1101	982	2721	2668	2817
YER087C-A	37	37	37	43	36	51	32	37	41	36	44	30	30	43	38	33	38	26	51	37	30	47	27	43	22	16	46	35	64	25	45	44	33	27	30	37	31	37	30	29	43	54	54	28	18	45	38	47
YER087C-B	613	600	605	561	521	619	532	516	641	776	724	717	558	594	524	583	544	439	562	563	545	586	498	515	263	213	556	624	1101	633	932	847	738	646	712	945	707	664	671	570	644	652	771	260	266	528	592	618
YER087W	171	161	145	188	156	138	109	99	107	210	201	166	123	115	112	187	184	130	324	190	230	169	176	173	49	55	160	60	282	73	262	147	139	134	157	188	144	160	132	196	203	167	181	80	63	230	203	200
YER088C	448	406	423	1185	1093	1081	377	389	520	398	323	394	388	425	414	335	344	333	307	268	320	265	257	266	121	137	389	286	625	260	851	481	421	395	344	473	322	354	388	507	434	447	442	148	151	537	467	485
YER088C-A	32	28	33	41	39	47	19	23	26	44	17	55	12	25	24	41	48	27	15	17	18	11	32	33	5	7	25	30	37	53	77	48	29	32	38	30	23	29	26	43	24	51	41	6	5	47	30	41
YER088W-B	1	1	1	1	1	0	0	1	3	4	0	1	0	1	1	3	2	1	1	1	0	2	3	2	0	0	1	1	2	1	3	1	1	1	2	1	1	2	0	2	0	0	0	0	0	0	2	0
YER089C	835	718	740	1177	1109	943	706	646	862	1055	749	905	598	657	632	1161	1162	879	677	579	593	609	723	817	290	309	698	675	965	781	1817	876	745	662	628	795	619	656	712	712	634	720	802	292	312	968	791	699
YER090C-A	0	0	0	0	0	0	0	0	0	0	0	0	0	0	0	0	0	0	0	0	1	0	0	0	0	0	0	0	0	0	0	1	0	0	0	0	0	0	0	0	1	0	0	0	0	0	0	1
YER090W	1092	999	1060	1755	1540	1732	1159	1059	1470	1159	948	827	1225	1109	1253	998	1075	873	933	938	1016	1344	1325	1255	377	372	1001	708	1192	866	1508	875	765	781	828	1105	718	876	856	1365	1135	1216	885	351	302	1460	1355	1370
YER091C	3203	3183	3485	8730	8279	9758	4277	4030	4734	5837	6322	5796	7411	5651	6818	4548	4814	5093	2889	5245	7911	2221	2178	2151	781	1307	1950	1492	1818	1422	2063	1921	533	901	992	1490	839	1242	1253	1673	1624	1385	3022	1037	1109	1368	1280	878
YER091C-A	0	0	0	1	0	0	0	0	0	1	0	0	1	1	1	1	0	0	0	0	0	0	0	0	0	0	0	0	1	1	1	0	0	0	1	1	1	0	0	1	0	0	0	0	0	0	0	0
YER092W	102	94	95	84	82	94	79	91	110	154	142	98	79	74	82	104	119	93	141	78	95	117	81	96	33	33	90	90	176	85	169	116	120	100	102	146	112	96	100	85	99	94	95	41	25	88	77	98
YER093C	568	498	522	706	631	607	431	446	502	703	598	607	434	441	512	719	774	677	548	422	467	517	474	540	182	184	515	405	673	427	1037	542	450	554	465	716	459	535	536	623	541	579	448	195	152	748	542	545
YER093C-A	65	59	57	46	54	43	34	37	46	75	73	77	34	45	41	65	65	48	117	44	69	60	53	53	17	31	55	36	106	43	124	69	85	55	65	74	55	42	42	75	67	71	93	42	41	82	86	72
YER094C	796	754	774	926	897	940	723	707	897	790	723	678	817	796	833	757	655	500	862	535	675	932	911	925	383	382	782	613	1132	664	1151	951	818	613	755	961	652	712	760	802	887	822	986	404	438	926	857	919
YER095W	463	440	456	396	450	497	414	424	604	465	362	462	537	445	437	420	402	296	444	349	457	567	680	639	193	139	437	295	588	365	788	566	435	335	469	464	310	457	388	529	520	548	631	253	217	616	491	595
YER096W	34	34	37	21	24	20	20	29	23	29	20	22	26	25	21	16	23	29	36	46	48	176	160	169	25	26	62	21	44	33	42	32	20	21	25	31	27	36	34	7	7	19	37	13	13	11	7	13
YER097W	18	15	16	44	36	56	9	7	13	14	12	14	7	7	5	14	11	6	4	9	4	98	71	61	8	8	22	9	8	8	11	8	6	9	8	9	5	7	7	8	19	16	11	1	6	15	10	11
YER098W	80	70	71	124	105	89	83	69	77	107	77	61	57	71	98	79	94	60	106	60	94	65	77	70	27	25	87	49	113	42	118	90	67	76	48	90	59	53	55	58	62	63	82	37	27	105	67	83
YER099C	431	402	425	423	367	419	329	339	454	575	524	465	359	410	361	485	482	443	389	346	374	402	310	373	227	189	444	392	641	422	671	511	515	438	462	631	415	419	507	410	457	389	449	147	141	497	420	444
YER100W	370	343	357	449	398	463	322	317	378	402	361	314	371	336	305	348	336	313	339	269	327	365	308	343	157	148	378	307	552	310	578	448	359	364	390	571	336	391	369	387	309	358	419	163	173	399	416	399
YER101C	91	82	82	107	93	103	72	78	102	110	87	78	82	75	76	100	95	78	87	94	76	91	93	82	35	28	88	72	131	60	161	102	66	67	85	107	72	89	90	86	70	81	123	32	42	100	77	99
YER102W	5899	5860	5882	5954	5406	6087	5069	5236	6200	6495	6146	6390	5386	6135	5114	5245	5332	4503	4610	5111	5080	5683	4618	5617	2145	1772	5341	6398	10073	6889	9729	8685	7229	6243	6905	8164	6110	6514	6486	6097	6995	6946	6898	2071	2174	6417	6896	6014
YER103W	111	91	93	181	197	159	79	66	83	133	101	94	90	83	86	119	129	86	117	80	102	117	94	132	27	43	92	77	102	77	229	94	85	82	64	111	72	69	83	100	99	80	79	36	27	156	108	102
YER104W	52	47	49	45	42	67	40	42	60	71	65	61	47	32	49	70	63	61	54	54	45	62	43	52	11	21	47	39	81	42	83	55	44	40	37	65	43	39	45	56	59	51	70	22	14	50	53	30
YER105C	2410	2164	2328	2526	2160	2349	1643	1771	2046	3110	2747	2637	1824	1716	1972	2630	2716	2666	2560	2307	2685	2025	2046	2099	1247	1162	3334	2366	3218	2171	4101	2461	1944	2421	2273	3081	2081	2449	2355	2407	2308	2488	2569	921	996	2640	2203	2096
YER106W	4	3	4	3	4	1	0	3	7	9	3	8	1	1	5	0	2	3	3	2	2	4	8	3	1	0	7	3	5	3	2	3	2	1	0	4	2	3	5	2	5	3	20	4	2	3	3	3
YER107C	460	424	431	517	382	419	402	384	481	380	377	321	406	404	445	429	389	349	429	416	427	567	537	510	183	182	485	393	694	464	783	472	408	453	448	526	389	407	477	560	513	487	415	183	158	590	572	510
YER107W-A	0	0	0	0	0	0	0	0	0	1	0	0	0	0	0	0	1	0	0	0	0	0	0	0	0	0	0	0	0	0	0	0	0	0	0	0	1	0	0	0	0	2	0	0	1	0	0	0
YER109C	230	207	218	365	313	326	170	165	233	276	259	230	217	203	216	229	272	264	241	165	249	217	204	224	87	106	272	186	284	171	375	193	125	215	194	234	159	209	190	234	252	233	190	69	70	295	218	238
YER110C	11730	10996	11897	10629	9086	11099	10938	11674	13283	12531	11830	11851	11010	10874	12533	9826	10774	11496	7524	9609	9992	10408	10126	11004	4632	4310	11258	16575	18175	14017	20135	15174	12180	14144	12039	16888	12210	13309	13662	12409	12588	13657	10595	3833	3369	12388	11537	12172
YER111C	629	616	646	696	676	785	534	627	755	635	651	603	689	526	752	514	629	486	671	522	719	882	949	907	225	276	874	531	916	502	991	570	445	585	540	717	468	631	577	733	758	703	564	244	220	714	728	638
YER112W	449	422	440	430	382	502	374	430	441	519	477	469	375	427	402	485	406	378	475	391	439	406	356	398	183	171	462	387	742	322	675	508	504	436	449	681	435	421	453	502	515	506	573	194	158	485	467	481
YER113C	718	660	646	714	666	719	653	636	704	969	940	860	632	580	667	875	959	742	558	585	580	775	707	710	264	271	595	644	1010	542	1326	830	646	716	634	823	597	638	664	509	614	604	919	301	339	612	528	492
YER114C	1048	937	976	1227	1030	1103	879	914	1054	1263	1194	1100	869	747	952	1284	1249	1241	814	759	860	854	783	889	330	350	911	1037	1429	992	1840	1115	849	1152	1043	1427	958	1089	1051	991	1029	1038	1031	361	394	1193	969	777
YER115C	111	96	99	158	138	131	108	95	104	127	100	98	129	104	123	131	126	90	79	70	99	131	121	150	18	25	60	59	107	89	158	91	59	94	78	121	73	76	90	127	108	132	104	47	42	173	152	102
YER116C	92	82	86	125	118	117	98	84	100	108	89	83	109	99	126	103	111	113	64	56	57	97	115	124	23	20	80	59	84	69	151	88	62	69	66	89	69	86	68	98	101	87	69	31	18	138	89	94
YER117W	9696	9494	9706	8029	7452	8685	9102	8270	10321	11335	10615	10599	8993	10202	9010	8990	8289	7617	7846	8662	8615	8690	6616	7948	3960	3330	8164	10931	16801	10690	15664	14513	13420	10716	12042	14535	10766	10363	11769	9737	11149	10804	10481	3402	3196	10201	10703	10214
YER118C	502	476	475	524	413	500	410	358	479	516	509	520	502	421	452	479	465	427	433	406	446	612	542	529	175	159	426	434	863	460	773	576	425	478	543	673	496	561	477	547	596	589	524	197	188	632	527	531
YER119C	90	85	80	204	193	210	55	75	73	136	100	113	35	52	38	91	98	63	97	55	61	110	117	132	43	37	86	42	142	62	159	101	64	59	74	71	45	69	81	71	55	69	131	46	36	66	58	44
YER119C-A	0	0	0	0	1	2	0	0	0	0	0	0	0	1	0	1	0	0	0	0	1	0	1	0	0	0	0	0	0	0	0	0	0	0	1	1	0	0	0	0	1	0	0	0	0	1	0	0
YER120W	1688	1502	1569	1980	1998	2027	1395	1219	1676	2180	1833	1881	1449	1377	1407	2221	2072	1805	1227	1157	1393	1329	1251	1289	604	518	1357	1409	2373	1656	3141	1797	1631	1648	1594	2044	1528	1523	1623	1519	1442	1508	1748	607	651	1942	1768	1591
YER121W	3	2	3	11	3	11	3	1	2	2	2	4	2	3	3	0	2	3	4	2	1	6	2	5	1	0	2	2	1	1	3	3	1	2	2	1	1	2	3	2	4	2	7	1	2	1	1	0
YER122C	1482	1337	1401	1739	1568	1707	1223	1131	1431	1650	1547	1263	1334	1129	1353	1544	1484	1506	1309	1196	1274	1350	1208	1294	539	496	1532	1259	2077	1305	2456	1680	1298	1831	1568	2241	1529	1717	1647	1421	1313	1285	1327	512	435	1718	1433	1444
YER123W	632	603	609	544	435	482	494	472	571	672	706	629	465	502	490	586	641	561	629	519	520	761	732	757	262	261	751	587	1053	528	962	767	663	727	616	869	610	638	654	704	747	762	735	258	243	739	698	654
YER124C	1018	956	973	2880	2427	2897	880	926	1088	1161	1120	1048	914	846	791	875	901	833	815	606	748	1182	1178	1166	346	357	1012	538	1349	538	1049	759	668	696	574	842	656	693	687	1272	1225	1238	808	309	307	1199	1068	725
YER125W	2638	2412	2590	2973	2695	3027	2403	2472	3033	2805	2501	2457	2484	2347	2785	2377	2384	2430	2567	2013	2283	2572	2491	2687	950	1017	2527	2325	3455	2220	4039	2830	2567	2707	2407	3321	2367	2512	2465	2990	3062	3199	2569	976	993	3438	3015	2861
YER126C	1262	1159	1198	968	834	984	1108	989	1107	1584	1404	1410	1019	1007	882	1590	1360	1366	1195	1145	1037	1267	1062	1334	577	469	1092	1312	1949	1116	1897	1595	1387	1395	1387	1889	1311	1235	1512	1066	1270	1160	1480	481	483	1158	1195	1218
YER127W	759	704	720	552	419	489	600	596	680	942	782	692	628	608	582	828	789	797	701	675	664	822	716	854	249	217	668	785	1161	821	1159	905	660	868	843	1135	778	807	824	923	887	849	640	215	227	906	940	852
YER128W	66	58	65	47	45	88	54	41	80	101	79	47	46	54	71	72	47	51	71	61	61	85	88	119	25	17	56	52	75	48	99	60	51	57	66	94	51	63	56	85	77	66	83	19	31	68	74	63
YER129W	931	811	880	1115	963	972	781	803	954	1161	1037	1052	849	733	920	1087	1101	1135	798	712	705	936	919	1010	288	283	843	778	1066	726	1557	757	701	960	753	1060	697	772	789	927	989	1047	909	305	302	1125	969	978
YER130C	501	466	467	922	845	916	341	402	433	607	504	463	324	415	357	452	514	468	351	318	384	259	218	269	237	160	622	384	887	405	1014	541	402	609	526	675	525	654	519	447	384	382	469	184	126	573	433	580
YER131W	8239	7903	8141	6536	5746	6889	7837	7175	8762	8750	8875	8691	7018	8192	7233	7805	7700	6745	7401	6760	7200	5706	5042	6060	3108	2863	6980	9389	14330	8722	14434	11128	11991	9073	10433	11813	9342	8437	9880	8438	9673	9369	9802	3447	3045	8940	8745	8738
YER132C	1073	969	1042	1399	1186	1296	1004	1090	1274	1321	1212	1138	764	718	920	1070	1231	1258	999	972	1102	1285	1252	1361	337	325	1003	999	1299	917	1618	1003	743	1174	983	1351	939	1068	1005	998	957	1035	1080	367	343	1111	873	888
YER133W	2125	1996	2045	2177	1949	2117	1938	1847	2177	2358	2369	2017	1928	1900	1924	2119	2158	1992	1808	1795	1762	2280	1863	2098	703	634	1822	2231	3583	2102	3411	2538	2365	2418	2178	3104	2136	2230	2360	2097	2033	2016	2009	809	684	2257	2061	2137
YER133W-A	1	1	0	1	0	1	0	0	0	0	1	0	1	0	0	0	1	0	0	0	1	2	0	1	1	0	0	0	0	0	1	1	0	0	1	1	0	0	0	2	1	2	1	1	1	1	3	0
YER134C	211	191	191	219	235	201	192	148	181	216	156	199	176	171	173	193	189	150	181	186	195	434	411	409	65	41	124	149	263	132	327	220	217	198	187	226	187	171	194	208	199	214	188	69	70	239	218	181
YER135C	0	0	1	1	1	2	0	0	1	1	0	0	0	0	0	0	0	1	0	1	0	1	1	0	0	0	0	0	1	0	0	0	1	0	2	0	0	0	1	0	1	0	2	0	3	0	0	0
YER136W	1512	1458	1485	2127	1983	2176	1266	1357	1530	1622	1813	1501	1322	1278	1473	1368	1440	1234	1742	1447	1640	973	851	901	607	605	1628	1504	2658	1311	2358	1700	1561	1559	1421	1994	1384	1624	1520	1637	1571	1635	1564	652	635	1649	1473	1534
YER137C	79	73	76	65	40	30	45	47	59	70	53	63	89	64	83	55	55	44	60	53	64	116	102	111	48	40	113	113	173	115	143	120	82	109	125	131	83	87	98	61	64	45	47	13	18	74	64	79
YER137C-A	0	0	0	0	0	0	0	0	0	0	0	0	0	0	0	0	0	0	0	0	0	0	0	0	0	0	0	0	0	0	0	0	0	0	0	0	0	0	0	0	0	0	0	0	0	0	0	0
YER137W-A	1	1	1	0	1	0	0	1	0	0	2	0	0	0	1	0	1	0	0	1	1	4	1	6	0	1	0	1	2	0	0	0	1	0	0	1	0	0	0	0	0	1	4	0	0	0	0	2
YER138C	0	0	0	0	0	0	0	0	0	0	0	0	0	0	0	0	0	0	0	0	0	0	0	0	0	0	0	0	0	0	0	0	0	0	0	0	0	0	0	0	0	0	0	0	0	0	0	0
YER138W-A	1	0	0	5	4	5	0	0	0	0	0	0	0	0	0	0	0	0	0	0	0	0	0	0	0	0	0	0	0	0	0	0	0	0	0	0	0	0	0	2	2	0	0	0	0	2	1	0
YER139C	115	109	113	86	92	91	106	101	130	161	155	135	78	111	100	138	122	110	128	101	103	170	106	121	41	36	105	117	199	101	158	134	124	116	119	168	114	104	126	94	123	113	127	39	44	98	91	122
YER140W	248	240	242	243	213	240	215	233	274	289	292	246	207	198	253	264	257	273	249	239	216	259	224	265	77	80	202	283	433	225	404	314	248	294	263	357	244	278	270	252	229	266	208	104	85	239	243	212
YER141W	978	907	909	531	545	610	537	667	842	1517	1483	1286	736	713	727	1078	1081	969	2170	1169	1373	886	805	813	612	778	1463	387	1254	389	1095	856	606	523	555	852	493	678	769	1241	1316	1246	1488	560	652	1369	1144	1037
YER142C	32	29	31	104	101	84	32	23	41	36	22	29	37	44	46	17	13	13	67	22	33	68	76	76	10	14	33	15	25	10	19	20	19	13	13	17	9	7	9	18	17	26	26	15	15	15	22	18
YER143W	235	221	220	335	300	262	192	210	272	280	248	243	230	194	293	231	294	209	171	186	255	311	323	335	55	83	164	174	310	176	433	190	140	191	215	255	167	189	182	229	193	205	210	103	96	315	284	209
YER144C	338	314	337	357	287	349	239	305	404	418	352	351	332	350	355	379	393	383	282	224	264	316	306	294	127	98	325	295	490	308	595	385	339	358	380	463	310	363	381	368	312	325	282	88	81	417	382	432
YER145C	2222	2190	2025	1591	1330	1413	1985	2546	2975	2983	2528	3058	974	922	836	2512	2921	2341	1172	831	982	2181	2163	2033	466	399	928	2676	4346	2638	5098	3877	2513	2219	2097	3221	2102	2296	2904	2651	2444	2661	1805	676	604	2914	3481	1275
YER145C-A	1	1	1	1	0	4	1	1	2	1	0	0	2	0	1	0	1	0	1	1	2	0	2	0	0	0	2	0	2	0	2	2	0	1	1	0	0	0	1	1	2	1	0	0	1	5	2	6
YER146W	358	338	359	367	304	394	356	285	399	461	377	476	298	320	290	402	386	332	287	305	377	185	199	260	143	90	249	310	528	406	647	542	521	341	444	461	388	404	377	355	325	356	469	179	141	358	385	350
YER147C	125	114	119	167	144	152	93	98	141	157	98	121	110	117	146	174	140	125	99	100	112	126	163	147	49	46	103	89	134	131	256	131	90	104	141	132	79	93	103	130	113	110	101	47	42	138	141	136
YER147C-A	1	1	1	2	0	1	0	1	1	4	1	1	2	2	0	0	3	2	1	1	1	0	0	0	1	1	0	1	2	2	3	1	1	2	2	0	0	4	1	1	1	2	3	0	0	1	1	2
YER148W	795	748	770	856	715	787	662	640	765	1016	876	696	711	666	704	899	835	851	723	695	717	632	586	706	304	250	771	773	1245	780	1263	947	805	852	882	1250	727	907	935	816	794	748	725	296	235	973	889	806
YER148W-A	18	19	17	23	29	17	13	13	18	23	18	17	17	18	14	27	19	11	14	22	12	24	17	19	8	10	22	12	20	16	29	17	16	12	21	34	13	16	18	20	22	21	14	8	11	28	30	14
YER149C	304	270	287	315	284	297	309	300	407	363	281	299	357	277	339	306	327	287	275	236	307	277	286	291	72	85	186	242	366	272	503	305	219	307	265	385	261	305	268	350	287	327	242	118	113	379	335	304
YER150W	37	33	37	32	40	61	48	36	54	30	19	23	43	63	52	21	15	16	86	44	37	17	13	19	15	8	20	6	70	15	36	28	11	21	20	24	18	20	22	52	60	45	62	11	15	63	41	134
YER151C	1047	891	950	1336	1265	1094	897	812	1052	1220	1038	872	957	813	1043	1220	1251	1240	1145	954	1100	854	867	895	375	364	1055	787	1141	824	1873	980	715	1066	836	1307	817	870	827	1070	877	878	839	325	305	1244	977	1043
YER152C	184	156	141	587	494	313	91	101	111	223	145	213	95	124	95	347	339	172	109	98	112	80	81	126	52	46	102	92	187	150	434	184	158	110	117	136	96	146	104	144	97	149	135	52	47	160	126	130
YER152W-A	0	0	0	1	0	0	0	0	0	2	1	0	0	0	0	0	0	0	0	0	0	0	0	0	0	0	0	0	0	0	0	1	0	0	0	0	0	1	0	0	2	0	0	0	0	0	1	0
YER153C	14	11	10	47	42	37	9	11	21	14	5	12	7	12	8	30	25	13	5	5	5	1	3	7	7	2	3	3	5	10	33	16	4	3	7	10	4	5	1	14	5	13	14	4	2	20	12	11
YER154W	577	459	464	738	632	510	377	323	444	746	577	601	292	408	422	907	795	628	498	410	436	318	384	396	173	164	488	328	659	385	1467	460	353	400	357	539	313	342	376	622	545	608	547	205	192	926	622	583
YER155C	2820	2611	2820	3908	3448	4044	1941	2346	2731	3046	2858	2885	2115	2031	2679	2327	2597	2493	3120	2418	2938	2945	2772	2852	1259	1321	3929	3024	4077	2561	4148	3457	2544	3018	2678	3685	2554	3058	2783	2740	2606	2807	3377	1154	1152	2776	2350	2219
YER156C	1463	1291	1364	1195	1108	1144	1213	1222	1372	1440	1299	1276	1435	1315	1372	1626	1590	1651	1194	1480	1438	1210	1242	1372	490	503	1255	1233	1822	1336	2998	1389	1338	1638	1567	1966	1437	1330	1460	1616	1314	1431	1294	510	446	1925	1672	1600
YER157W	518	491	493	611	548	575	377	404	445	618	630	530	421	421	419	488	567	533	580	486	560	511	490	474	234	214	605	488	851	473	893	609	511	576	520	712	486	501	502	514	435	443	443	219	205	524	463	415
YER158C	208	202	195	64	78	76	93	152	133	287	237	274	136	180	103	206	230	224	259	227	198	170	162	189	123	98	190	191	531	151	503	314	346	310	223	315	251	286	281	108	101	109	285	95	94	129	113	244
YER158W-A	6	7	7	5	0	1	5	14	14	1	2	4	7	3	7	3	3	5	2	4	5	4	0	2	4	1	5	4	18	7	11	14	7	8	16	15	6	10	6	8	11	4	8	1	3	8	12	18
YER159C	228	214	220	210	195	207	170	168	215	291	262	247	192	222	176	229	241	231	283	202	209	319	277	356	131	124	309	154	290	160	315	236	212	227	192	249	198	228	229	243	218	195	238	94	69	224	255	243
YER159C-A	0	0	0	0	0	0	0	0	0	0	0	0	0	0	0	0	0	0	0	0	0	0	0	0	0	0	0	0	0	0	0	0	0	0	0	0	0	0	0	0	0	0	0	0	0	0	0	0
YER160C	0	0	0	0	0	0	0	0	0	0	0	0	0	0	0	0	0	0	0	0	0	0	0	0	0	0	0	0	0	0	0	0	0	0	0	0	0	0	0	0	0	0	0	0	0	0	0	0
YER161C	223	204	214	265	291	248	192	156	218	245	212	172	214	204	233	278	278	269	237	211	258	259	259	250	96	87	267	134	248	168	376	214	184	214	165	281	170	212	207	202	193	185	179	83	60	281	251	216
YER162C	87	76	79	148	124	129	70	58	74	109	69	52	73	75	77	99	92	66	93	91	106	109	91	146	38	33	64	50	101	51	116	69	59	84	76	105	65	63	78	83	67	73	87	35	32	87	91	69
YER163C	156	146	146	206	160	164	125	119	150	201	185	175	168	151	157	174	177	144	197	94	136	141	105	116	68	82	138	112	238	101	211	170	131	116	133	197	107	121	145	175	188	172	180	88	80	166	179	184
YER164W	1486	1323	1378	1984	1742	1710	1301	1362	1684	1594	1432	1359	1210	1083	1428	1697	1795	1627	1415	1194	1352	1249	1335	1294	509	539	1605	1144	1713	1137	2828	1389	1179	1597	1352	1783	1255	1509	1310	1441	1413	1416	1274	527	504	1799	1454	1281
YER165C-A	0	0	0	0	0	0	0	0	0	0	0	0	0	0	0	0	0	0	0	0	0	0	0	0	0	0	1	0	0	0	0	2	0	0	0	0	0	0	0	0	0	0	0	0	0	0	0	0
YER165W	13318	11681	12379	14671	13102	12660	11876	10398	13495	15109	13620	13031	11837	10952	13095	16332	16924	14361	11375	11963	13163	10580	10658	10989	4769	4710	13093	12558	16037	13393	25373	13040	10968	13670	12429	16171	11336	11887	12024	11728	11327	12436	13129	5283	4817	15424	12879	11983
YER166W	1842	1717	1723	2360	2144	2194	1411	1457	1733	2261	2090	2009	1543	1417	1652	1763	1934	1875	2115	1434	1673	1835	1844	1852	716	799	2068	1365	2674	1191	3015	2022	1673	1831	1652	2121	1567	1787	1664	1890	1937	1936	1916	672	739	2046	1896	1460
YER167W	716	644	687	841	733	818	647	626	770	810	798	720	793	741	832	681	693	726	738	562	693	681	605	629	259	290	737	579	1004	603	1128	694	520	778	676	935	646	671	700	736	640	655	681	267	251	745	656	721
YER168C	637	616	637	580	514	566	522	549	611	764	716	608	603	561	658	666	693	645	515	644	603	724	714	757	248	257	677	741	977	684	990	634	595	576	684	817	595	627	629	711	672	676	550	236	244	767	759	788
YER169W	450	396	401	450	367	385	363	378	459	560	483	425	402	305	405	549	522	437	500	425	429	517	600	621	168	134	391	438	581	384	715	400	274	478	417	560	399	429	394	386	375	374	386	148	133	439	377	349
YER170W	54	55	51	56	69	67	35	40	60	51	50	55	38	29	30	51	46	31	114	53	66	52	58	52	15	36	35	36	90	19	67	58	58	37	66	76	44	50	57	84	83	71	61	29	27	68	61	63
YER171W	698	628	663	693	576	666	575	519	633	820	674	595	612	553	716	748	824	761	714	636	754	723	672	676	301	263	830	542	874	572	1091	684	552	719	652	856	621	688	646	816	753	727	577	241	194	922	805	763
YER172C	1505	1369	1448	1873	1608	1763	1214	1238	1409	1972	1575	1523	1289	1173	1347	1586	1677	1803	1448	1353	1433	1585	1633	1714	641	671	1846	1151	1740	1139	2229	1480	1126	1544	1424	1938	1311	1447	1328	1561	1438	1439	1485	578	487	1691	1494	1431
YER172C-A	0	0	0	0	0	0	0	0	0	0	0	0	0	0	1	0	0	0	0	0	0	1	0	0	0	0	0	0	0	0	0	0	0	0	0	0	0	0	0	0	0	0	0	0	0	0	0	0
YER173W	153	138	138	191	179	160	118	138	157	229	181	177	123	94	155	212	202	160	151	135	134	181	146	150	59	43	175	94	185	120	207	132	88	142	124	155	121	111	110	158	177	137	134	65	57	174	161	138
YER174C	362	358	369	338	312	314	280	239	344	248	310	334	385	351	397	245	235	239	336	400	354	184	167	166	151	89	363	245	761	213	595	460	618	421	418	502	500	437	396	555	517	505	372	149	145	576	528	648
YER175C	74	60	70	78	67	92	55	47	54	82	61	65	53	31	44	69	50	64	118	78	81	92	85	107	31	29	59	49	103	57	114	71	64	65	54	101	63	60	80	58	69	59	118	38	53	66	54	64
YER175W-A	4	3	2	7	6	3	1	3	2	7	4	5	4	3	3	9	4	5	4	3	1	3	3	1	0	0	2	3	7	1	5	4	4	3	2	3	1	2	1	3	1	2	2	1	1	2	1	3
YER176W	606	528	542	928	739	763	484	539	663	650	532	494	573	523	640	688	655	584	498	485	515	545	571	579	205	206	586	482	647	447	1025	489	324	578	502	672	434	540	510	672	626	592	565	192	186	762	674	572
YER177W	4137	3840	3908	5776	5139	5530	3876	3678	4560	5979	5628	5079	4174	4182	4404	5279	4876	4437	3776	3223	3610	3521	3388	3712	1393	1341	3288	2520	5257	2884	6217	4094	3758	3732	3605	4718	3428	3456	3613	4126	3886	3808	3392	1388	1209	4867	4466	4012
YER178W	3812	3641	3739	5176	4534	5155	2996	3018	3731	4478	3693	3748	3590	3739	3723	3268	3070	2879	3883	3012	3190	3837	3807	3823	1824	1820	4097	3211	6109	3320	6098	4993	4247	3780	3900	4943	3568	3905	3918	3631	3873	3935	3962	1443	1491	3878	3706	3889
YER179W	3	3	2	7	3	6	1	3	4	5	4	2	6	1	1	1	3	1	5	2	2	4	1	0	0	1	7	1	8	1	5	2	5	0	6	0	2	1	0	2	4	5	2	2	1	8	1	2
YER180C	152	138	139	215	188	176	156	140	186	200	162	147	120	94	130	179	170	156	123	132	116	164	165	158	63	43	119	92	229	117	241	133	109	141	145	191	131	127	130	189	136	146	88	34	26	178	168	175
YER180C-A	44	35	36	44	38	37	27	29	36	57	35	34	25	22	31	45	39	39	24	27	27	24	27	32	5	8	23	24	39	31	45	33	27	24	36	38	25	37	33	38	42	34	228	80	91	31	37	32
YER181C	4	4	4	2	7	6	3	6	8	5	6	4	3	5	4	6	4	5	3	3	2	5	8	6	3	2	1	1	6	0	5	4	4	6	5	4	5	4	3	2	4	7	8	0	0	4	2	2
YER182W	223	204	192	144	125	125	152	157	165	201	188	168	156	165	166	176	163	144	384	171	206	190	149	143	62	59	157	108	466	100	399	259	270	212	223	292	238	204	204	288	322	298	272	109	111	363	298	335
YER183C	175	170	176	228	186	207	164	151	189	195	204	162	133	148	158	167	147	142	182	185	185	192	169	212	95	83	225	131	300	160	300	174	180	136	192	186	141	164	192	190	188	184	164	70	72	201	189	179
YER184C	114	110	110	127	131	140	97	103	98	150	130	102	109	97	81	115	125	110	171	143	161	118	110	94	117	88	255	76	193	78	148	102	100	104	83	117	80	104	94	95	102	83	96	39	18	104	96	116
YER185W	13	14	17	14	15	23	9	11	12	11	8	14	9	7	11	8	9	8	11	23	35	9	14	11	19	25	51	15	31	9	29	17	14	20	13	22	14	18	10	9	12	14	20	4	3	4	6	18
YER186C	262	265	254	306	271	295	27	20	20	274	312	259	18	20	16	262	278	227	333	269	308	73	58	50	108	96	240	315	704	315	619	443	401	396	389	543	360	367	385	328	324	362	146	74	61	359	346	326
YER187W	49	48	48	9	8	5	32	70	57	114	85	110	39	93	54	89	68	78	24	34	34	86	102	107	1	0	0	23	40	21	51	25	26	21	33	34	16	11	9	70	64	57	88	28	27	66	64	101
YER188C-A	0	0	0	1	0	1	0	0	0	0	0	0	0	0	0	0	0	0	0	0	0	0	0	0	0	0	1	0	0	0	0	0	0	1	0	0	0	0	0	0	0	0	0	0	0	0	0	0
YER188W	7	7	5	27	18	15	23	29	18	0	0	0	14	29	10	0	0	0	9	8	5	6	2	4	10	3	15	2	3	1	2	2	0	0	2	0	1	0	0	0	0	0	14	2	2	0	0	0
YER189W	0	0	0	0	0	0	0	0	0	0	0	0	0	0	0	0	0	0	0	0	0	0	0	0	0	0	0	0	0	0	0	0	0	0	0	0	0	0	0	0	0	0	0	0	0	0	0	0
YER190C-A	0	0	0	0	0	0	0	0	0	0	0	0	0	0	0	0	0	0	0	0	0	0	0	0	0	0	0	0	0	0	0	0	0	0	0	0	0	0	0	0	0	0	0	0	0	0	0	0
YER190C-B	0	0	0	0	0	0	0	0	0	0	0	0	0	0	0	0	0	0	0	0	0	0	0	0	0	0	0	0	0	0	0	0	0	0	0	0	0	0	0	0	0	0	0	0	0	0	0	0
YER190W	0	0	0	1	0	0	0	1	0	0	0	0	0	0	0	0	0	0	0	0	0	1	0	0	0	0	0	0	0	0	0	0	0	0	0	0	0	0	0	0	0	0	1	1	0	0	0	0
YFL001W	484	447	474	433	380	380	438	372	469	552	521	467	420	372	410	584	585	509	424	493	495	536	495	524	190	173	515	413	721	423	820	510	397	585	554	730	472	504	532	415	412	430	421	180	163	551	432	671
YFL002C	714	647	695	654	521	535	666	646	762	923	731	678	646	609	653	858	857	822	563	577	605	683	663	736	218	241	668	575	974	588	1175	753	576	827	736	1012	627	710	727	725	641	685	666	253	228	906	788	1156
YFL002W-A	0	0	0	0	0	0	0	0	0	0	0	0	0	0	0	0	0	0	0	0	0	0	0	0	0	0	0	0	0	0	0	0	0	0	0	0	0	0	0	0	0	0	0	0	0	0	0	0
YFL002W-B	0	0	0	0	0	0	0	0	0	0	0	0	0	0	0	0	0	0	0	0	0	0	0	0	0	0	0	0	0	0	0	0	0	0	0	0	0	0	0	0	0	0	0	0	0	0	0	0
YFL003C	19	20	24	23	26	24	21	15	38	21	12	24	21	22	27	24	11	17	25	26	38	38	60	47	13	14	56	13	25	18	15	22	8	7	15	18	10	18	10	17	15	13	28	7	8	11	15	19
YFL004W	1809	1713	1795	4961	4415	4716	1470	1667	1792	2228	1959	1801	1496	1451	1588	2130	2041	1752	1338	1426	1468	1571	1411	1537	634	592	1666	1374	2201	1474	2655	1727	1362	1500	1577	2176	1273	1677	1574	1391	1455	1405	1345	508	507	1768	1595	2104
YFL005W	910	895	953	955	967	1045	846	797	871	1002	1022	1022	912	952	899	861	855	785	944	742	800	890	797	827	439	387	963	696	1473	753	1337	1072	1136	803	916	1165	811	828	904	927	1117	977	1193	382	402	1029	1125	1742
YFL007W	2750	2466	2740	3989	3355	3412	2358	2780	3207	2635	2227	2119	2804	2601	3418	2321	2495	2448	2747	2528	2851	3207	3255	3346	1096	1046	3014	2286	2886	2021	3756	2341	1658	2414	2157	3023	2097	2179	2224	3212	3133	3241	2745	986	913	3581	3025	4205
YFL008W	717	664	693	1153	1019	1106	584	680	819	725	621	547	748	579	698	690	711	637	681	625	711	794	820	759	245	273	846	467	884	488	1060	639	420	653	606	853	532	669	580	950	749	739	536	219	233	940	872	966
YFL009W	452	421	455	655	601	646	417	391	482	591	493	437	475	453	529	536	541	490	410	410	463	424	412	425	193	191	548	390	591	337	635	433	327	366	379	528	323	411	405	434	406	436	455	204	154	478	403	612
YFL010C	260	219	246	575	565	538	245	221	278	280	153	179	286	267	238	337	243	253	179	221	279	134	210	214	85	70	193	148	189	262	438	216	148	142	186	202	128	150	149	256	140	179	346	147	143	324	301	441
YFL010W-A	1	1	1	1	0	0	2	3	0	0	0	0	3	0	0	1	1	0	0	1	1	0	0	0	4	0	2	1	2	1	0	1	1	2	0	2	1	2	4	1	2	3	2	2	0	3	1	2
YFL011W	0	0	0	0	0	0	0	0	0	0	0	0	2	1	0	0	0	0	0	0	0	0	0	0	0	1	1	1	0	0	0	0	0	1	1	0	0	0	1	1	0	0	0	0	0	0	0	1
YFL012W	1	0	0	4	0	1	1	0	0	2	1	1	0	0	0	1	0	0	1	2	1	1	0	1	1	0	0	0	1	0	0	0	0	0	0	0	0	0	0	0	0	0	3	1	0	0	1	0
YFL012W-A	0	0	0	1	0	1	0	0	0	0	0	0	0	0	0	0	0	0	0	0	0	0	0	0	0	0	0	0	0	1	1	0	0	0	0	0	0	0	0	0	0	0	1	0	0	0	0	0
[truncated: 4,719 more rows]

## Sheet: EdgeR_Normalized_Data
Gene	BY4743_logFC	BY4743_FDR	BC187_logFC	BC187_FDR	DBVPG1373_logFC	DBVPG1373_FDR	YJM978_logFC	YJM978_FDR	NCYC3290_logFC	NCYC3290_FDR	Y12_logFC	Y12_FDR	YJM1592_logFC	YJM1592_FDR	YJM1389_logFC	YJM1389_FDR	YJM1273_logFC	YJM1273_FDR	YPS128_logFC	YPS128_FDR	YPS163_logFC	YPS163_FDR	YPS606_logFC	YPS606_FDR	Y2209_logFC	Y2209_FDR	Y389_logFC	Y389_FDR	Y7568_logFC	Y7568_FDR
YGR201C	-6.72475	0	4.0449	1.05e-199	-8.40811	0	-7.29815	0	-8.2753	0	-6.48071	0	-6.589	0	-7.27654	0	-7.67435	0	-7.4857	0	-7.62191	0	-7.54997	0	-6.92859	0	-6.63696	1.21572791947328e-313	-7.02719	0
YEL021W	-11.9126	7.97e-257	-0.0272267	0.924843	-0.0268045	0.914616	0.0135896	0.958954	0.181707	0.187209	-0.00961349	0.967185	-0.399723	0.000635955	-0.041447	0.827834	0.398491	0.00166626	0.300417	0.0289497	0.429393	0.000530716	0.387896	0.002835	0.0928791	0.665731	-0.171062	0.282905	0.310569	0.0216367
YCL018W	-12.1884	1.42e-168	-0.30006	0.226181	0.00603087	0.987216	-0.208184	0.458205	-0.316179	0.131007	0.2311	0.360018	-0.327518	0.0832047	-0.351988	0.101544	0.733158	9.27e-05	0.720676	0.000126121	0.311557	0.185972	0.511886	0.0142347	0.231169	0.399969	-0.874758	4.08e-06	0.21038	0.453755
YMR321C	-10.8448	2.98e-158	0.180082	0.362596	-0.0210731	0.94182	0.0428304	0.874018	-0.304667	0.0448202	-5.02581	3.37e-115	-1.73567	5.24e-35	0.354776	0.0193447	0.209618	0.214439	-0.17717	0.355642	-0.000476497	0.998284	-0.158811	0.439437	1.28696	1.91e-30	0.534686	0.000145743	1.14464	5.58e-24
YGR154C	-3.27895	6.88e-100	-2.69592	1.91e-71	-3.85602	7.95e-124	-3.16452	5.04e-90	-3.7528	3.62e-117	3.18836	1.86e-135	-2.82972	1.46e-80	3.01143	3.49e-121	-2.58933	2.13e-69	-2.70737	9.61e-77	-2.53757	3e-68	-2.54378	1.93e-66	-3.14176	4.22e-92	-3.28275	3.26e-79	-3.1142	4.65e-92
YLL052C	-5.07698	2.69e-97	-3.74703	6.4e-64	-0.926085	1.06e-05	-4.55259	1.59e-82	-1.09143	1.01e-07	-0.2305	0.450984	-4.27248	6.12e-79	-0.585625	0.0097127	1.85551	6.52e-22	1.02047	6.18e-07	1.24495	3.19e-10	1.28005	9.21e-11	-0.443301	0.0897243	-2.80836	7.08e-38	-0.34734	0.216923
YMR303C	-8.06248	2.59e-95	0.459918	0.309937	-1.08795	0.00132706	0.426332	0.352529	-1.13921	0.00056072	1.21103	0.00021763	-0.181249	0.635268	0.524078	0.154417	-0.465657	0.257749	-0.363712	0.441841	-1.00465	0.00473929	-0.915359	0.0127137	0.732612	0.0584171	0.917716	0.00768324	0.969254	0.00624048
YLL053C	-5.34098	1.87e-94	-3.84725	1.7e-60	-1.00419	6.17e-06	-4.84735	1.28e-81	-1.06487	1.21e-06	-0.239962	0.460968	-4.77272	1.01e-82	-0.419619	0.101611	1.84119	4.09e-19	1.09097	5.06e-07	1.23578	5.74e-09	1.28507	1.26e-09	-0.519494	0.0527276	-2.98893	5.45e-38	-0.360824	0.230526
YCR102C	-6.89597	6.02e-85	-4.85223	1.41e-53	-5.3955	3.23e-63	-5.21253	2.58e-59	-6.28907	3.19e-76	-8.13248	8.39e-97	-2.49428	1.48e-18	4.70269	1.06e-54	-6.19802	7.72e-75	-6.59418	1.46e-81	-6.85887	7.12e-84	-6.87083	5.91e-83	-5.9107	2.83e-70	-6.57623	7.36e-73	-6.35569	6.03e-77
YHR215W	3.41094	2.23e-84	-0.0362302	0.947386	-2.54778	6.81e-21	0.0843824	0.854353	-2.37108	2.36e-18	-3.79661	2.71e-30	-1.23791	2.15e-07	-9.09199	8.99e-33	-4.18033	1.7e-34	-3.73167	1.38e-33	-3.90096	2.77e-33	-3.45488	1.95e-27	-3.15151	5.64e-26	-9.12265	7.98e-34	-3.05436	1.08e-25
YAR071W	2.93136	2.59e-78	-1.27117	0.000150102	-2.68479	5.12e-14	1.86352	4.9e-24	-2.87027	1.87e-14	-2.3616	5.12e-11	0.0786673	0.806336	-7.95893	4.04e-18	-7.94761	3.13e-27	-5.53683	1.65e-26	-5.42172	1.39e-24	-5.25193	5.26e-22	-0.705546	0.0400375	-7.94166	2.36e-18	-0.849809	0.0089951
YPL019C	1.95894	1.2e-74	-0.152786	0.396675	0.0139966	0.951498	-0.35831	0.00707265	-0.00647255	0.974377	-1.71919	1.1e-54	-2.04287	1.56e-75	-0.89758	2.24e-15	0.0049528	0.983869	-0.104161	0.590888	0.0194851	0.934037	-0.0543479	0.803405	-0.336435	0.013413	-1.20195	1.09e-26	-0.326402	0.0163967
YPL088W	-2.57166	4.71e-71	0.603164	9.49e-06	0.130508	0.552483	0.326854	0.0430429	0.168531	0.304138	0.421086	0.0041925	-0.401475	0.00335731	0.419538	0.00449014	0.0998685	0.637971	-0.0409336	0.879942	-0.105244	0.64122	-0.155543	0.463055	0.0614406	0.839876	-0.214453	0.232231	0.258139	0.142584
YKR046C	-3.00263	3.75e-69	-0.665383	0.000193405	1.55792	8.51e-24	-0.728533	2.97e-05	1.27433	3.7e-16	-0.515019	0.00568484	0.93591	2.8e-09	0.0783883	0.753916	-0.744211	2.48e-05	-0.766634	1.05e-05	-0.915794	5e-08	-0.833879	1.22e-06	-0.725616	3.18e-05	0.571008	0.00145812	-0.760097	1.09e-05
YML075C	-2.01709	4.6e-68	0.153015	0.430636	0.510497	5.95e-05	0.168184	0.355566	0.282069	0.0422861	-0.113376	0.559549	-0.00409677	0.980359	-0.0170945	0.933558	0.264262	0.0767386	-0.106729	0.604723	-0.00439552	0.987407	0.0586624	0.798225	0.292797	0.054496	-0.309885	0.0289513	0.0679701	0.785589
YBR093C	3.41133	1.36e-59	-3.23504	6.37e-40	-1.82578	1.95e-16	-0.330851	0.301786	-2.25645	2.12e-23	-1.56927	2.16e-12	-5.32231	6.31e-75	-0.588802	0.021194	-2.65356	2.58e-30	-2.42388	1.24e-26	-2.57718	3.4e-29	-2.74484	1.51e-31	-2.05276	7.38e-20	-4.61	1.46e-51	-2.04912	5.51e-20
YKL216W	1.78285	2.04e-59	-0.446905	0.000592108	-0.352198	0.0100326	-0.436966	0.000789307	-0.445946	0.000433121	-0.526257	1.9e-05	-0.0322148	0.834898	0.132892	0.397168	-0.0375305	0.864161	-0.270016	0.0735398	-0.153456	0.377421	-0.198916	0.23139	-0.250603	0.108395	-0.621933	4.19e-07	-0.343127	0.0138748
YDR481C	1.98166	9.2e-58	-0.0940995	0.724788	-0.217516	0.258061	-0.0108877	0.96958	-0.365931	0.0177444	-1.03882	1.88e-14	0.366171	0.00781459	-0.512401	0.000807548	-0.855995	7.69e-10	-0.907529	2.98e-11	-1.00627	1.14e-13	-1.00219	2.72e-13	0.000183019	0.999156	-0.159914	0.398479	0.0268698	0.936723
YER053C-A	-6.76913	1.04e-57	-0.870748	0.0214362	0.777839	0.041253	-1.83956	1.78e-08	0.305834	0.454444	0.627521	0.114258	-0.467334	0.178619	0.175036	0.702375	0.29183	0.536781	0.0346864	0.961003	0.305756	0.544391	0.392867	0.411216	0.139216	0.847117	-0.0554907	0.914652	-0.163371	0.805569
YHR136C	3.19254	1.06e-57	-1.82213	1.17e-10	-1.29781	1.23e-06	-1.1932	2.13e-05	-1.41363	1.74e-07	-2.78846	8.51e-20	-4.10469	6.09e-32	-2.00834	5.44e-10	-1.13085	5.09e-05	-0.84024	0.003365	-1.41615	1.49e-07	-1.17975	2.83e-05	-0.991571	0.000405036	-2.32997	4.57e-12	-1.02614	0.000215197
YNL111C	-2.60725	2.59e-57	-0.0850249	0.805518	0.708998	4.22e-05	0.0938693	0.772615	0.502756	0.00620953	0.123862	0.656118	-0.0730072	0.729942	0.153244	0.4938	0.16804	0.493838	-0.124468	0.671402	-0.0336677	0.921698	-0.0635068	0.845236	0.0322604	0.937242	0.329796	0.102752	-0.116537	0.719071
YMR015C	-1.72622	1.35e-55	-0.186457	0.26218	0.911806	1.88e-16	-0.183036	0.268212	0.633632	4.06e-08	-0.431627	0.000530164	0.106995	0.433805	0.114416	0.460601	0.0896278	0.626781	-0.005586	0.98277	-0.0310975	0.89204	0.0330558	0.889613	-0.0922106	0.672784	0.129613	0.406066	-0.289683	0.0413108
YJL088W	-2.66283	1.24e-53	-2.33358	2.34e-41	-1.1952	2.71e-14	-2.60005	2.36e-48	-1.17718	1.05e-13	-3.98907	9.92e-83	-1.13072	3.85e-13	-2.39092	4.42e-35	-3.13185	1.61e-64	-3.16433	6.53e-70	-3.17382	2.29e-67	-3.1903	1.19e-64	2.23624	2.22e-61	1.63057	1.65e-31	2.40065	2.17e-70
YGL009C	2.34381	6.52e-53	-0.47902	0.0103365	-1.05232	3.06e-11	-0.187446	0.463596	-0.934477	5.71e-09	-0.748539	6e-06	-1.28944	8.06e-17	-0.608327	0.000345341	-0.0353221	0.910662	-0.198801	0.417846	-0.351819	0.0908666	-0.307058	0.158901	-0.376425	0.0644353	-1.39849	6.15e-19	-0.375478	0.0620974
YJR048W	-3.05527	7.79e-51	-0.764219	0.000598295	0.170484	0.631119	-0.38044	0.160453	0.211495	0.418472	-0.00733594	0.987335	-0.276302	0.221923	0.336602	0.170797	0.141576	0.663947	0.342646	0.227827	0.383491	0.156068	0.333133	0.241834	-0.0172981	0.975531	0.727484	0.000903018	0.0249596	0.960994
YLR460C	-5.58335	2.59e-49	-8.24587	2.12e-72	-6.46993	3.92e-59	-11.8786	1.24e-86	-6.84076	1.07e-62	-4.3842	1.34e-34	-6.19387	6.44e-56	4.74137	7.57e-41	-5.21543	1.53e-44	-5.6356	5.9e-50	-5.89398	2e-52	-6.01432	2.58e-53	-5.18824	3.57e-44	-8.97056	1.09e-69	-5.66494	7.29e-50
YJL012C	1.66175	1.11e-48	0.0733919	0.762438	-0.0324995	0.902951	-0.243985	0.125091	0.132463	0.3957	-0.499168	0.000107436	-1.07004	4.6e-20	-0.128843	0.428634	-0.184089	0.260545	-0.17821	0.314606	-0.165992	0.343147	-0.286153	0.0669785	-0.411877	0.00274223	-0.382944	0.0054813	-0.337456	0.0201502
YER072W	1.53266	1.48e-48	0.266681	0.0638889	-0.294924	0.0319614	-0.0118986	0.961732	-0.380286	0.00245187	-0.357276	0.00581733	-0.778343	2.43e-12	-0.250116	0.0680479	-0.0504211	0.801661	-0.132934	0.455913	-0.176701	0.265303	-0.209325	0.184332	-0.143619	0.435236	-0.496574	6.49e-05	-0.0980766	0.639532
YER073W	1.37377	1.02e-46	-0.77453	1.86e-13	-0.220729	0.107125	-0.582648	7.4e-08	-0.175897	0.167085	-0.553328	3.2e-07	-0.168661	0.145716	-0.823378	5.84e-14	-0.0313325	0.873405	-0.162223	0.287739	-0.121993	0.453585	-0.23666	0.0862079	0.490975	5.32e-06	-0.625438	2.77e-08	0.443999	6e-05
YIL011W	-2.18795	2.4e-46	-0.20346	0.393355	0.617455	9.21e-05	0.269113	0.189874	0.142391	0.474089	0.0658082	0.822232	-0.711244	2.24e-06	0.785399	2.12e-07	0.0620255	0.815115	0.537167	0.00142439	0.0715387	0.801988	0.163159	0.500365	-0.740344	3.02e-06	0.911031	1.11e-09	-0.915538	2.71e-09
YJL217W	2.36514	4.51e-46	-9.32155	9.08e-52	-9.32296	2.77e-59	-7.35741	2e-49	-9.32817	1.1e-56	0.986049	2.76e-07	-1.69009	2.53e-13	-2.83738	3.13e-19	0.286118	0.289681	0.725452	0.000579112	0.62045	0.00550556	0.794315	0.000141475	-9.32564	5.18e-56	-0.596551	0.0356668	-9.32257	1.02e-57
YEL020W-A	-2.27688	1.9e-45	-0.43468	0.0266532	-0.0275467	0.939846	-0.541565	0.00337422	-0.274032	0.159348	0.320466	0.11814	-0.622368	0.000119379	-0.0758547	0.759021	0.145772	0.551985	0.508953	0.00668071	0.30226	0.159998	0.275303	0.220721	0.519946	0.0046029	0.261291	0.203228	0.413934	0.0341208
YLR420W	1.40118	1.5e-44	-0.0880354	0.680675	-0.233823	0.104102	-0.138029	0.428259	-0.294977	0.0196149	-0.250299	0.0716913	-0.33558	0.00312475	-0.392807	0.00181408	-0.0422061	0.831756	-0.136153	0.424126	0.00104396	0.996175	0.0530633	0.800755	-0.203938	0.188198	-0.34984	0.00805907	-0.21386	0.153991
YDL231C	-1.51901	2.58e-44	-0.0731321	0.746651	0.236543	0.106299	0.0683948	0.756211	0.104459	0.487291	0.0454701	0.837016	0.431111	0.000120029	0.259885	0.0489446	0.0320008	0.881963	-0.0162238	0.947909	-0.0878708	0.651035	-0.00902756	0.969637	0.2286	0.129696	0.198051	0.165653	0.0729024	0.746705
YBR069C	1.561	3.89e-43	-1.86762	9.44e-51	0.159917	0.392434	-2.03868	4.87e-59	0.198785	0.182149	0.101855	0.616487	-0.912243	4.57e-14	0.816396	1.19e-11	-0.520655	0.000122124	-0.369449	0.0122102	-0.230543	0.166183	-0.346117	0.0235093	0.0133361	0.969257	0.293424	0.0496772	0.0186052	0.951466
YFL004W	1.27538	5.08e-42	0.0406326	0.857669	0.00745936	0.970518	-0.0782142	0.673294	0.0997874	0.455252	-0.2438	0.0502353	-0.342547	0.000908149	-0.143266	0.27897	-0.132896	0.349095	-0.180524	0.201689	-0.15694	0.270981	-0.169501	0.241834	-0.360432	0.00164532	-0.456246	3.61e-05	-0.0633769	0.756367
YFL051C	-7.17069	8.93e-42	-0.526351	0.378695	-0.473924	0.423825	-0.625385	0.254188	-0.627397	0.178029	-0.625392	0.232843	-3.96768	5.24e-21	-11.7084	6.72e-41	1.46614	0.000628633	1.15334	0.0118003	1.50011	0.00044665	1.43668	0.000926318	-1.77125	2.2e-05	-4.08238	5.62e-20	-1.10495	0.0177721
YKL201C	-1.89928	4.86e-41	-1.07805	2.09e-14	1.27962	4.1e-25	-1.53375	5.13e-27	1.25664	4.35e-24	0.346545	0.0296693	-0.485791	0.000466494	-0.461482	0.00411732	-0.293577	0.0870988	0.104669	0.659309	-0.134329	0.541894	-0.0677488	0.794391	-0.295154	0.103147	0.00263264	0.991943	-0.343131	0.0426764
YCR037C	-1.13228	2.2e-40	0.0137093	0.949384	0.0234285	0.902951	-0.131843	0.310279	0.00161659	0.990927	0.43936	4.99e-07	-0.145583	0.12932	0.334169	0.000414798	0.0813358	0.538476	-0.0350867	0.836698	0.041955	0.799725	0.0718234	0.631737	0.216715	0.0463433	0.33388	0.000555475	0.166117	0.156913
YJR015W	1.37475	1.27e-39	-0.122832	0.558659	-1.38098	5.74e-31	-1.0718	9.01e-19	-1.43344	1.61e-32	-1.23176	1.58e-24	-0.608637	2.49e-07	-1.30665	8.23e-23	1.1189	1.91e-25	0.892002	3.06e-16	0.792488	8.84e-13	0.72968	1.17e-10	-1.97403	1.07e-55	-1.26838	1.12e-21	-1.9446	3.31e-55
YER044C	-2.29499	5.7e-39	0.347241	0.146502	0.89986	6.72e-07	0.422461	0.0549704	0.566221	0.00389719	-0.425849	0.0493827	-0.39079	0.0376541	-1.22766	9.25e-12	0.147363	0.596383	-0.042082	0.912104	-0.136898	0.654132	-0.131988	0.672053	0.333955	0.170643	-0.510794	0.0132789	0.149477	0.649336
YDR259C	-2.31531	6.13e-39	0.42543	0.0216485	-0.119912	0.67465	-0.0605713	0.855894	-0.131758	0.540022	0.19105	0.413662	0.638587	2.01e-05	0.607289	0.000327743	0.112723	0.652466	0.210792	0.356992	0.307073	0.131112	0.275869	0.202183	-0.683598	0.000102128	-0.142422	0.55792	-0.52582	0.00456469
YER088C	1.26622	1.46e-36	0.151832	0.394173	-0.355012	0.00688342	0.0957419	0.63434	-0.387973	0.00219848	-0.431465	0.000645884	-0.802785	1.83e-12	-0.259819	0.0727197	-0.235828	0.102433	0.157123	0.341332	-0.206729	0.180681	-0.195978	0.226148	0.0828083	0.70826	-0.0944914	0.587925	0.114417	0.552404
YGR049W	-2.22145	1.64e-36	1.47851	3.22e-19	0.664883	0.000342269	0.36516	0.101763	0.766372	1.85e-05	-0.191375	0.478547	-0.265805	0.167962	-1.29118	1.96e-12	-0.508392	0.0129608	-0.530754	0.0103603	-0.58248	0.00394113	-0.614459	0.00232976	-0.3006	0.228089	0.424477	0.0406451	-0.12089	0.722592
YOR346W	1.56035	4.77e-36	0.438162	0.00860122	-0.312492	0.106502	0.257064	0.199372	-0.202717	0.271097	-0.227538	0.281642	-0.411838	0.00801201	-0.669989	0.000228333	-0.507287	0.00355584	-0.884802	1.68e-08	-0.755375	2.66e-06	-0.679902	5.44e-05	0.153411	0.534592	-0.0480866	0.855176	0.270118	0.165192
YEL034W	-1.19553	5.54e-36	0.215856	0.105857	-0.0374221	0.86252	0.302489	0.0109648	-0.318345	0.00477804	0.0752589	0.661642	-0.4566	5.06e-06	0.0311915	0.84795	0.416998	0.000157486	0.182693	0.194167	0.182131	0.186102	0.253112	0.0488534	0.222177	0.0949102	-0.114739	0.401235	0.162029	0.273571
YOL143C	1.71635	1.22e-35	-0.129657	0.651839	-0.309762	0.118635	-0.417895	0.0234386	-0.415494	0.016259	-0.465178	0.00786502	-0.213961	0.206362	-0.820678	9.19e-07	-0.187611	0.380432	-0.073816	0.79739	-0.266578	0.197816	-0.173893	0.472399	-0.241698	0.280019	-0.118105	0.602746	-0.051711	0.880715
YGL263W	-3.49188	2.77e-35	0.477419	0.109741	0.713263	0.00481638	-0.0814298	0.865886	0.371439	0.173384	-10.0552	6.21e-62	0.6451	0.00483917	-10.0692	6.39e-46	0.405672	0.168598	0.555549	0.0471841	0.326777	0.307319	0.593072	0.0339484	-0.806754	0.00275978	0.482386	0.0895085	-1.21666	1.33e-06
YKR093W	-2.28889	1.88e-33	0.164329	0.651839	-0.206797	0.511635	0.347961	0.186338	-0.416207	0.0645275	0.410632	0.0908516	-2.15831	4.81e-30	0.675752	0.00103461	0.414826	0.0846519	0.618122	0.00637613	0.130342	0.705632	0.283557	0.310739	0.352875	0.189639	-0.73838	0.00044101	0.189548	0.574955
YEL033W	-1.18429	5.66e-33	0.216824	0.11804	0.00243507	0.991822	0.30003	0.0152982	-0.24179	0.0457047	0.102404	0.538505	-0.392806	0.000175769	0.0660709	0.663532	0.384567	0.000967507	0.123535	0.450519	0.126835	0.4285	0.204213	0.150613	0.213249	0.127621	0.0616916	0.695317	0.0778078	0.699898
YER124C	1.34451	3.73e-32	0.121043	0.584584	0.0156388	0.950444	-0.0554635	0.82882	-0.229291	0.119829	-0.364211	0.0109373	0.152134	0.277782	-0.0579704	0.761752	-0.423265	0.00259084	-0.516937	0.000127414	-0.613881	2e-06	-0.464226	0.000912915	0.304393	0.0484906	-0.332715	0.0262368	-0.095112	0.682538
YHR143W	1.2829	1.62e-31	0.37606	0.00583296	-0.305682	0.0356335	-0.0536727	0.82882	-0.658013	7.11e-08	-0.332268	0.0182313	-0.371878	0.0023132	0.222336	0.129714	-0.228329	0.138465	-0.262606	0.0900016	-0.258682	0.0978184	-0.165556	0.353629	0.272843	0.0730193	-0.00957464	0.962494	-0.163765	0.374575
YLR050C	-1.51165	2.66e-31	0.0792769	0.754832	0.424224	0.00166273	-0.173158	0.371594	0.0714416	0.691343	-0.261388	0.10775	0.190075	0.163411	0.0272334	0.904478	0.156745	0.367134	0.165898	0.369437	0.050168	0.838648	0.128345	0.525865	0.217103	0.215234	0.222055	0.179344	-0.0313453	0.918332
YHR208W	1.33036	1.21e-30	-0.34555	0.019443	-0.467475	0.000501236	-0.231228	0.165562	-0.527218	4.95e-05	-0.396944	0.00437842	-0.400034	0.00139362	-0.416711	0.00205295	0.396283	0.00472165	0.0835154	0.707832	0.0401049	0.868003	0.049756	0.836551	0.0403003	0.892826	-0.870008	2.5e-12	0.117034	0.592051
YAR027W	1.46945	2.25e-30	-0.104718	0.757955	1.45652	1.79e-29	0.853546	1.14e-08	1.1744	5.6e-18	-7.51936	8.34e-65	-2.58655	5.41e-33	-3.03663	6.73e-27	-1.50731	4.93e-15	-1.55289	9.5e-17	-1.39595	1.06e-13	-1.63721	2.24e-16	-0.146635	0.627215	-0.643922	0.00435174	-0.133085	0.663544
YNL054W-B	2.57623	4.15e-30	-3.26623	3.42e-14	-0.658512	0.0842894	-8.17589	1.47e-24	-0.699938	0.0463961	-8.17649	1.89e-25	-0.779782	0.0138763	-0.273152	0.537468	0.274637	0.507586	0.508759	0.160036	-0.0789591	0.889381	0.0508873	0.934139	-1.99519	3.4e-08	-0.174537	0.722806	-1.8724	1.27e-07
YHR047C	-1.17707	3.27e-29	0.206366	0.170476	-0.310822	0.0167442	0.143522	0.394398	-0.407847	0.000598569	0.882052	4.46e-17	-1.31977	4.33e-36	0.763748	9.03e-13	0.109495	0.507002	-0.144537	0.387233	-0.0768418	0.693264	-0.0137109	0.953971	0.547171	1.2e-06	-0.552493	1.54e-06	0.464856	7.45e-05
YIL121W	2.6376	2.23e-28	-2.06457	3.63e-13	-2.36932	2.64e-17	-3.56942	4.78e-29	-2.70824	8.87e-21	-0.842451	0.0049158	-3.73775	1.2e-32	-1.60336	9.29e-08	-4.14351	9.78e-36	-4.79257	1.8e-43	-4.135	2.43e-36	-4.62983	8.62e-39	0.908749	0.00108454	1.72155	3.85e-12	1.24411	1.44e-06
YIL051C	1.30788	2.74e-28	0.36238	0.0154446	-1.1834	6.32e-22	0.151038	0.453577	-1.34506	8.66e-28	-0.709878	2.91e-08	-0.871784	1.67e-12	0.0472629	0.813321	0.067303	0.753353	0.430067	0.00299404	0.0467327	0.849707	0.108765	0.612925	-0.257593	0.129696	0.500364	0.000227168	-0.353104	0.0201502
YJR127C	1.06034	3.41e-28	0.228965	0.114141	-0.727214	1.45e-10	0.173023	0.273838	-0.557266	2.03e-06	0.0686644	0.725957	0.214203	0.0633787	0.462563	9.42e-05	-0.106075	0.52641	0.00240363	0.990686	-0.375594	0.00366568	-0.317393	0.0225419	-0.227311	0.128923	0.207718	0.152929	-0.442443	0.000339662
YGR233C	1.1669	3.62e-28	0.348385	0.00913241	-0.265443	0.0687771	0.0815965	0.708902	-0.244657	0.0714888	0.462607	0.000138117	-0.874472	1.48e-14	0.565137	1.69e-06	-0.563189	5.18e-06	-0.70185	2.39e-09	-0.490495	9.77e-05	-0.590069	1.41e-06	0.160734	0.370433	-0.0708778	0.69336	0.164071	0.347661
YGR060W	-1.23105	4.03e-28	0.390645	0.00353175	0.516154	2.93e-05	0.336614	0.0156839	0.346225	0.00899733	-0.00281015	0.992211	-0.24721	0.0485522	-0.310273	0.019459	0.2334	0.118787	0.0879194	0.674641	-0.0382122	0.868075	-0.012123	0.961984	-0.0718017	0.770936	0.0460988	0.806961	-0.23048	0.147563
YLL012W	-1.51884	1.18e-27	0.440302	0.00680738	0.569348	0.000139853	0.617431	3e-05	0.634611	1.31e-05	0.130964	0.566606	-0.529891	0.000210536	-0.201073	0.278288	0.00369447	0.991312	-0.27865	0.145451	-0.356089	0.0469002	-0.341155	0.0630106	0.168282	0.469275	-0.338616	0.0543404	0.172019	0.450455
YNR060W	-5.19446	2.04e-27	0.0782987	0.938437	-0.246612	0.760135	-1.5599	0.00112594	-0.456631	0.402334	-1.00751	0.0522132	-1.35422	0.0018512	-2.43562	4.77e-08	2.14301	2.89e-06	0.574401	0.364236	1.06619	0.0459263	0.978189	0.0746136	-0.842491	0.140746	-3.63365	2.28e-15	-1.28729	0.0102852
YAL056W	1.11806	2.67e-27	-0.524427	0.000106518	-0.303064	0.039598	-0.431571	0.0022036	-0.366708	0.00756495	1.0389	7.16e-23	0.00873231	0.958468	1.23969	6.13e-30	-0.784207	6.95e-10	-0.505485	0.000134142	-0.678931	8.37e-08	-0.602056	5.29e-06	-0.455349	0.000843796	0.558128	1.13e-05	-0.515018	9.82e-05
YLR237W	-2.05985	2.95e-27	-0.629196	0.00490237	1.37203	6.09e-13	-1.18139	1.76e-09	1.33905	2.14e-12	0.549785	0.0144136	-0.799746	3.81e-05	0.473147	0.0329598	-0.407816	0.0941309	-0.364367	0.170462	-0.347649	0.188242	-0.508533	0.0366822	-0.138531	0.719362	-0.788947	0.000174691	-0.167501	0.639532
YBL100W-B	-2.34084	3.72e-27	-2.73662	6.87e-31	-8.26204	7.49e-79	-5.40445	2.58e-59	-7.40718	1.48e-73	-10.0046	8.02e-74	-1.32621	4.28e-11	-5.50319	1.44e-45	-6.54845	3.59e-70	-7.0901	2.6e-78	-5.51837	1.38e-66	-6.12466	2.79e-65	2.70936	1.79e-61	-2.953	7.91e-27	2.76557	4.5e-64
YPL110C	1.31599	5.6e-27	0.0868421	0.757591	-0.528878	0.000597774	0.0943342	0.722268	-0.398449	0.0126448	0.133051	0.546125	0.0425554	0.813927	0.234495	0.186953	-0.515214	0.00125489	-0.413818	0.013167	-0.386118	0.0244268	-0.339516	0.0624828	0.0147851	0.969305	-0.441119	0.0120361	0.126881	0.605846
YKL051W	-1.60734	7.17e-27	-0.732408	3.65e-06	0.486105	0.00218598	-1.02887	1.78e-11	0.105773	0.599972	-0.126475	0.600466	0.859401	3.26e-10	-0.0025848	0.994265	0.053142	0.839563	-0.0647988	0.818083	-0.102806	0.690594	0.0436563	0.883829	0.322576	0.0836285	0.220167	0.257507	0.252301	0.211548
YGL055W	-1.84802	1.23e-26	-0.534155	0.0110527	0.7775	4.01e-05	-0.143538	0.654742	0.677633	0.000445244	-0.773542	4.05e-05	-0.440456	0.0189009	-0.228935	0.321009	0.297057	0.213144	0.395837	0.089153	0.194157	0.494411	0.31025	0.216118	0.036424	0.934438	-0.226446	0.339291	-0.0564656	0.892092
YJL079C	2.0994	1.76e-26	0.622071	0.0246832	-0.676113	0.0237376	-0.193718	0.662919	-0.684594	0.017375	-1.50579	1.41e-07	-0.800569	0.00205816	-1.45256	8.15e-06	-0.828793	0.00491134	0.0291424	0.956606	-0.458353	0.167614	-0.508482	0.135924	-0.116072	0.830942	-0.425309	0.224442	-0.116011	0.825104
YJL020C	0.954718	2.13e-26	-0.194779	0.15525	0.0838758	0.628383	-0.539167	2.4e-07	0.0287359	0.858306	-0.280982	0.0169746	-0.112418	0.326444	0.36377	0.000815921	-0.0861893	0.57616	-0.0395584	0.837639	-0.255546	0.0411542	-0.200184	0.140495	0.100354	0.556338	-0.179489	0.177791	0.00346406	0.988394
YEL024W	-2.24699	2.79e-26	-0.600329	0.01947	-0.127511	0.756376	-0.440331	0.115298	-0.613977	0.0115556	0.00541083	0.991765	-0.0132867	0.965117	0.272464	0.325143	0.260202	0.391754	0.53807	0.0437732	0.574596	0.0294914	0.644008	0.0121412	-0.0623806	0.904808	0.552799	0.0276251	-0.290436	0.381881
YNR043W	-1.07234	2.96e-26	-0.0550833	0.804528	0.468119	2.4e-05	0.00596568	0.97839	0.358664	0.00196631	-0.137297	0.379544	0.181173	0.118114	-0.200015	0.121034	0.293705	0.0181969	0.00379489	0.985422	0.0779671	0.674181	0.108402	0.52829	-0.0676227	0.759936	-0.0808021	0.601292	-0.0622797	0.774717
YHR072W	-1.03688	1.26e-25	0.293013	0.0167137	0.0551652	0.786475	0.385909	0.000626107	0.245087	0.0387064	-0.150272	0.306789	-0.115974	0.331097	-0.0678923	0.657087	0.230137	0.0705827	0.0632604	0.741027	0.135784	0.370043	0.122955	0.45017	-0.00742146	0.978339	-0.331595	0.00544944	0.091443	0.626649
YOL014W	-1.69485	2.31e-25	0.125801	0.695229	-1.06571	1.72e-10	0.32588	0.136997	-1.24222	5.7e-14	-0.111942	0.697912	-0.853723	2.19e-07	-0.469005	0.0134689	0.834505	1.22e-06	0.672777	0.000196758	0.628973	0.000603533	0.636988	0.000527823	0.0349993	0.933631	-0.50546	0.00873099	0.179147	0.522312
YGR295C	1.43401	3.76e-25	-3.4386	2.3e-60	-1.82947	3.18e-27	-4.97259	4.94e-84	-2.14271	5.12e-34	1.38494	4.91e-23	1.44986	1.74e-25	0.510876	0.00346202	0.515141	0.00283695	-0.126578	0.64383	-0.420077	0.0343059	-0.339415	0.112283	-4.21705	2.09e-78	0.285669	0.159698	-3.66112	8.77e-70
YGL001C	-1.14256	4.48e-25	1.01967	3.3e-21	0.572091	7.82e-07	-0.0225287	0.927661	0.409669	0.0008664	0.168492	0.296333	-0.148748	0.252242	-0.0851579	0.607096	-0.0942768	0.599897	-0.173192	0.298689	-0.266843	0.0700763	-0.300511	0.036885	-0.231481	0.133647	-0.0388215	0.837591	-0.180041	0.284301
YOR176W	0.889523	2.52e-24	0.00995334	0.970221	0.0888459	0.591766	0.327259	0.00290779	0.0976662	0.443585	0.0178943	0.932107	-1.24818	2.26e-35	-0.586217	1.98e-07	-0.33902	0.00292604	-0.405283	0.00019388	-0.497553	1.91e-06	-0.33933	0.00385392	0.337441	0.00168304	0.421555	8.55e-05	0.402488	7.97e-05
YPL117C	-0.879994	2.56e-24	0.00735622	0.976524	0.342904	0.000430408	-0.0185349	0.925299	0.218082	0.0355687	0.0186631	0.923417	-0.117362	0.253495	0.00501806	0.977118	0.239407	0.0252373	0.00696734	0.973154	0.0352151	0.842575	0.0987238	0.497784	0.150351	0.246948	0.00667777	0.966337	0.0261069	0.903867
YER060W	-1.21065	3.6e-24	-0.166879	0.374047	-0.215712	0.188604	-0.619325	1.17e-06	-0.333694	0.0147727	0.824535	1.8e-13	-0.957325	1.16e-15	-1.30062	5.75e-22	-0.768273	6.72e-10	-0.868282	6.73e-13	-1.06706	9.77e-19	-1.08411	9.69e-19	0.3742	0.00563351	2.75401	1.59e-146	0.178395	0.308287
YFL062W	-4.31884	4.48e-24	0.713518	0.0322233	-0.43311	0.304254	1.75455	7.27e-12	-1.0239	0.00236749	-0.240937	0.613767	0.299659	0.348393	-3.13454	3.32e-12	-0.212978	0.645259	-0.797757	0.0278899	-0.76679	0.0392315	-0.771808	0.0433759	0.890637	0.00345189	0.191453	0.663127	0.568906	0.112592
YBR026C	1.64812	5.78e-24	-0.666482	0.00202602	-0.738882	0.000289185	-0.250281	0.380219	-1.08719	3.04e-08	-0.823688	5.08e-05	-0.682328	0.000322447	-0.327529	0.180981	-1.25916	1.81e-10	-1.03701	1.31e-07	-1.23107	3.16e-10	-0.968344	1.95e-06	1.04971	1.82e-09	0.952711	2.77e-07	0.954988	8.03e-08
YCL049C	-1.69526	1.35e-23	-0.923249	1.54e-07	0.833067	2.92e-07	-2.00827	2.09e-29	0.759246	4.29e-06	0.0790371	0.801206	0.67302	2.35e-05	0.101962	0.680794	0.480781	0.0102605	0.597627	0.000896423	0.419008	0.0373409	0.390506	0.0609443	-3.55042	6.72e-69	-0.0605124	0.827009	-3.01294	7.71e-57
YJR060W	1.28105	1.51e-23	-0.186347	0.447339	0.000575675	0.999755	-0.0147084	0.963222	-0.0429356	0.856764	-0.133524	0.581425	-0.450266	0.00338143	-0.130127	0.556758	-0.128158	0.575194	-0.200411	0.358793	-0.191815	0.379419	-0.107724	0.681286	-0.133044	0.619949	-0.526444	0.0050591	-0.0244541	0.946981
YHR028C	1.2378	2.96e-23	-0.224655	0.253013	0.605281	1.23e-05	-0.278785	0.119673	0.481963	0.00085429	0.00195306	0.994487	0.505699	0.000144859	-0.52912	0.000560356	-0.931329	1.86e-11	-0.686969	1.47e-06	-0.838262	1.56e-09	-0.759906	8.9e-08	-0.267514	0.147534	0.110574	0.580653	-0.325647	0.0567345
YPL057C	-0.984409	4.56e-23	0.366953	0.00134018	-0.338781	0.00378296	0.257805	0.0412157	-0.548157	2.1e-07	-0.359468	0.00174812	-0.601976	3e-09	-0.0291526	0.864042	0.234961	0.0623243	0.087604	0.620279	0.162331	0.257328	0.126008	0.433075	0.749072	4.14e-14	-0.443773	9.58e-05	0.546687	1.34e-07
YJL213W	-1.85809	2.22e-22	-0.291928	0.29186	-0.141803	0.674572	1.2433	2.79e-12	-0.0429489	0.889596	-2.753	2.99e-40	-3.85283	2.61e-65	-0.521871	0.0186861	0.515682	0.0160208	1.1243	5.15e-10	0.738781	0.000189305	0.733647	0.000247467	-0.678732	0.0013253	-1.99656	9.73e-21	-0.675724	0.00143963
YML126C	-1.09268	2.6e-22	0.0628599	0.799453	0.517301	2.96e-05	0.0245754	0.923716	0.377082	0.00396664	-0.288861	0.0434411	0.231773	0.0673629	-0.212082	0.137902	0.143502	0.391952	0.00889768	0.973165	0.0495317	0.828626	0.056611	0.801064	-0.0306223	0.916281	0.0105684	0.956856	-0.103637	0.632377
YKL120W	1.50974	2.03e-21	-0.577726	0.00304827	-0.372872	0.0862634	-0.497743	0.0142577	-0.384296	0.0514404	-0.535188	0.0058391	0.454445	0.00870994	0.104259	0.675664	0.16351	0.520079	-0.0576524	0.868202	-0.153832	0.586	-0.0783878	0.809448	-0.206842	0.457396	-0.943752	2.64e-07	-0.330178	0.149866
YPL198W	-0.978903	6.14e-21	0.168555	0.294998	-0.526155	3.25e-06	0.491658	1.59e-05	-0.66462	1.05e-09	0.0348728	0.878105	0.131274	0.292821	-0.176712	0.191078	0.408018	0.000747017	0.0631604	0.75683	0.230106	0.10699	0.196714	0.193017	0.227504	0.116737	-0.0117236	0.948694	0.210881	0.152188
YOR032C	-3.6076	9.29e-21	1.55622	3.08e-06	-1.86363	1.81e-07	1.53061	4.43e-06	-1.69105	2.55e-06	0.422464	0.370443	0.560811	0.10964	0.453868	0.278356	-0.308944	0.535139	-0.293043	0.59716	-0.476167	0.308222	-1.17191	0.00286097	-2.08817	7.19e-09	1.30766	0.00015446	-1.60744	9.85e-06
YBR001C	1.86517	1.29e-20	-0.283673	0.450825	-1.25867	3.52e-07	-0.729261	0.00867369	-1.53542	6.63e-10	0.617985	0.0149142	0.435852	0.0627609	0.439885	0.112458	-0.807992	0.00245403	-0.280553	0.418339	-0.443598	0.147711	-0.53843	0.0747512	-1.0223	6.48e-05	0.268756	0.395918	-0.353702	0.29222
YLR348C	1.38524	1.96e-20	0.138604	0.659509	-0.933847	8.59e-08	0.0636866	0.854623	-0.812146	4.92e-06	0.197303	0.42541	-0.208239	0.271609	-0.217725	0.347599	-0.0518107	0.866917	0.324607	0.133295	-0.117483	0.688154	-0.154905	0.576975	-0.805361	7.63e-06	0.169542	0.48063	-0.334153	0.135681
YLR286C	1.19574	2.35e-20	0.310488	0.0757552	0.162728	0.444393	-0.02815	0.924637	-0.286978	0.0718401	-0.540464	0.000214183	-0.578638	1.99e-05	0.326373	0.0368118	-0.290418	0.088519	-0.38232	0.0208833	-0.318022	0.0692895	-0.270405	0.143261	0.325284	0.0599342	-0.169673	0.352489	-0.1418	0.542039
YOL058W	-1.30846	2.6e-20	-2.8394	1.23e-74	-0.571875	0.000269825	-2.07492	4.71e-45	-0.619417	5.43e-05	-1.17203	3.93e-16	0.729426	1.91e-07	-0.477572	0.00342197	-2.22399	3.94e-51	-2.36995	1.06e-58	-2.35003	5.28e-57	-2.66064	2e-68	1.7983	2.23e-40	1.67677	6.09e-35	1.83827	3.58e-42
YMR045C	3.77444	2.68e-20	-6.8699	2.85e-09	-6.85504	1.54e-10	-6.86354	3.02e-09	-6.85834	4.37e-10	-4.94911	4.62e-08	-6.86143	1.08e-10	-4.44604	1.05e-05	-6.86452	6.77e-10	-6.83649	8.42e-11	-6.87326	2.52e-10	-6.86685	1.83e-09	-6.86155	5.38e-10	-6.81338	6.74e-07	-6.85727	3.17e-10
YHR177W	-2.21477	2.86e-20	0.299611	0.337553	0.165524	0.650673	0.0458609	0.919937	0.105421	0.730265	-0.182075	0.602172	-0.0976201	0.714243	-0.486041	0.0834281	0.0573988	0.885144	-0.186051	0.59888	-0.286531	0.350215	-0.145566	0.698921	0.866213	3.53e-05	-0.315645	0.300723	0.717415	0.00124209
YDR281C	2.31589	3.12e-20	-0.418787	0.437024	-0.773461	0.0636121	-0.645301	0.15926	-1.09834	0.00489721	-1.06264	0.00908331	-1.40299	9.98e-05	-3.67044	3.97e-10	-0.324779	0.500015	-0.0623936	0.924534	0.0182412	0.978528	0.0451109	0.946489	-0.227733	0.718998	-0.857417	0.0655531	-0.122329	0.86499
YLR153C	-0.899908	4.27e-20	0.208295	0.130128	0.560062	6.81e-08	0.189397	0.174786	0.359982	0.001293	-0.159702	0.265291	-0.670788	1.73e-11	-0.0796456	0.581585	0.273692	0.0248695	-0.0260379	0.903946	0.0367154	0.855331	0.0704363	0.700805	0.118826	0.488225	-0.133183	0.330462	-0.0300963	0.90289
YMR202W	-1.13146	4.44e-20	-0.0746162	0.776496	0.564207	2.82e-05	0.0734003	0.772709	0.193606	0.217524	0.0863198	0.698163	-0.129336	0.392283	0.0745689	0.692425	0.22601	0.18072	-0.0431711	0.87019	-0.10402	0.635686	-0.0794931	0.735236	0.280041	0.0971071	-0.149127	0.391134	0.193128	0.31354
YPL018W	1.51456	5.9e-20	-0.00865447	0.986287	-0.188189	0.574223	-0.188351	0.592734	0.2905	0.214885	-0.327197	0.251984	-0.707217	0.000891443	-0.245118	0.415552	-0.204137	0.4989	-0.228003	0.463086	-0.421609	0.115486	-0.224379	0.493688	-0.161299	0.670786	-0.492293	0.0815736	-0.0741683	0.870146
YMR011W	-1.78297	6.13e-20	0.0652166	0.890122	-0.172377	0.624247	0.319538	0.266737	-0.429707	0.0664298	-0.536611	0.0233784	-1.42734	3.56e-13	-0.419588	0.0759653	0.523055	0.0290474	1.16578	1.32e-08	0.396059	0.138794	0.51845	0.0394718	0.152697	0.696216	-1.2299	1.12e-09	0.131368	0.743289
YKL129C	1.19155	6.73e-20	-0.17812	0.458478	-0.164425	0.474175	-0.0662663	0.826914	-0.12739	0.514997	0.223327	0.263123	0.775722	1.11e-08	0.0884957	0.688425	-0.523451	0.00167973	-0.426007	0.0144413	-0.7164	3.88e-06	-0.686421	1.69e-05	-0.312063	0.106849	-0.259746	0.185713	-0.0708044	0.821632
YGL169W	-0.783182	1.03e-19	0.106988	0.453672	-0.0533936	0.745117	0.170034	0.139804	0.0674689	0.57223	-0.0455624	0.780714	-0.0118745	0.920296	0.0812552	0.523267	0.137556	0.233884	0.0694947	0.64383	0.162785	0.156893	0.17802	0.123724	0.14412	0.245317	-0.168964	0.153933	0.133176	0.292326
YLR205C	-3.7635	1.1e-19	-1.34854	0.0015696	1.15474	0.00598563	-1.03069	0.0225454	1.23976	0.00212459	-1.25965	0.00288196	0.428717	0.308294	-0.275488	0.602405	0.0676464	0.927917	-0.0422802	0.960376	0.382783	0.512511	0.283341	0.658427	-0.851931	0.077285	-0.251095	0.649272	-0.801938	0.0990775
YMR006C	-1.5586	1.46e-19	1.00264	2.18e-08	0.109981	0.744421	0.971224	6.63e-08	-0.0137412	0.96732	-1.08269	1.17e-09	-2.1215	3.02e-34	-2.03596	9.66e-31	-0.15438	0.574701	0.0271306	0.944586	-0.407275	0.0770133	-0.366992	0.123091	1.00939	1.87e-08	-0.491843	0.0173655	0.777678	3.87e-05
YOR065W	-2.0836	2.63e-19	-0.692713	0.0126632	0.373598	0.264662	-0.55665	0.0580908	0.463159	0.0940779	-0.394609	0.212922	-0.285512	0.2875	0.31762	0.287244	0.0189787	0.966996	0.4023	0.224184	0.334691	0.315631	0.294718	0.414689	-0.0393429	0.947893	0.528565	0.0605835	-0.0891016	0.868263
YNL104C	0.879253	4.61e-19	0.233429	0.0842839	-0.439354	8.32e-05	0.212439	0.120032	-0.682164	5.48e-11	-0.337824	0.00436782	0.462839	6.81e-06	0.0534018	0.736793	-0.118189	0.43785	-0.0415887	0.839522	-0.239783	0.0770858	-0.174215	0.241834	0.199425	0.164176	-0.545391	7.16e-07	0.00684536	0.982556
YPL092W	-0.993934	5.99e-19	-1.88687	2.56e-56	-3.17594	5.76e-132	2.63741	3.65e-145	-3.66902	2.84e-154	-2.83675	2.56e-107	2.59737	1.3e-141	-2.62241	1.03e-77	-2.9842	1.25e-117	-3.0116	4.66e-124	-2.75192	7.56e-107	-3.02055	4.33e-117	-1.48817	1.89e-38	-0.621573	8.38e-07	-1.72806	1.74e-50
YJR059W	0.932559	7.51e-19	-0.0264558	0.927938	0.0508975	0.834039	-0.128853	0.507174	-0.0491363	0.786099	-0.0958502	0.623456	-0.310585	0.0111711	0.239219	0.0995283	-0.177832	0.263985	-0.042578	0.854969	-0.225928	0.151577	-0.122761	0.519003	-0.0386095	0.892668	-0.071623	0.705194	-0.0801823	0.726434
YOL164W	1.6627	8.01e-19	-7.74933	5.74e-22	-7.75447	1.53e-25	-7.75208	5.43e-22	-7.75521	3.28e-24	-7.75141	7.24e-23	-7.75217	4.74e-25	-7.73313	6.9e-16	1.39611	1.11e-11	1.47652	4.05e-14	1.30487	3.19e-10	1.42079	5.89e-12	-7.75335	5.05e-24	-7.75407	2.18e-16	-7.75364	7.23e-25
YER049W	-0.80341	8.75e-19	-0.132842	0.364407	0.0226354	0.913733	-0.544621	1.3e-08	0.0154415	0.923982	0.0905858	0.551465	0.265907	0.00631817	0.0839089	0.521775	0.190038	0.114013	-0.0806678	0.622308	0.0542161	0.757492	0.0966256	0.529338	0.486147	5.08e-07	-0.420235	3.46e-05	0.43705	1e-05
YKL125W	-0.793473	8.75e-19	0.0719397	0.682437	-0.164576	0.18878	-0.093124	0.546852	-0.153744	0.165142	-0.342834	0.000699794	1.18797	7.03e-49	-0.00846077	0.960919	0.126088	0.314551	-0.222024	0.0539146	0.014444	0.937824	-0.0301381	0.87235	0.0768099	0.649598	-0.503119	1.1e-06	0.0691032	0.688057
YPR013C	-1.68588	8.93e-19	-0.0771257	0.855893	-0.397409	0.110315	0.211826	0.49264	-0.253023	0.285688	-0.11485	0.737358	-0.387363	0.057433	-0.45127	0.048629	0.185385	0.51247	0.622814	0.0042862	0.607227	0.00547255	0.541926	0.0178818	-0.176612	0.607546	0.0419626	0.894774	0.147058	0.678571
YJL208C	-0.819446	3.78e-18	-0.200754	0.121864	-0.0370063	0.852951	-0.0907158	0.581719	-0.076154	0.56282	0.122471	0.38301	0.0443525	0.714582	-0.198353	0.107633	0.124117	0.34595	0.245188	0.0339242	0.305956	0.00489993	0.278488	0.0145334	0.150471	0.281815	-0.144425	0.28037	0.149244	0.281036
[truncated: 5,535 more rows]
