# Supplementary material for: Natural variation in the consequences of gene overexpression and its implications for evolutionary trajectories
Source: eLife. 2021 Aug 2;10:e70564. doi: 10.7554/eLife.70564 (PMC8352584; doi:10.7554/eLife.70564)
Supplement: Supplementary file 6. — Enrichments for commonly deleterious genes or strain-specific genes, as indicated in each tab title. Quantitative data were scored by Wilcoxon rank-sum tests and categorical data were scored by Hypergeometric test, as described in the Materials and methods. Each column indicates the category, enrichment p-value(s), and either Bonferroni corrected p-value (p/number of tests) or the significance score (1=FDR<0.05, 0=FDR>0.05) using Benjamini and Hochberg ranking. [file elife-70564-supp6.xlsx]

## Sheet: Common Genes-WilcoxonFishers
Feature_Common_Genes	Common_Genes_Pval	Common_Genes_Pval_BH_significant
physical_association	3.01e-68	1
CDS_PARS_RNAstructure	1.67e-31	1
GO:0022626 cytosolic ribosome	3e-28	1
GO:0002181 cytoplasmic translation	6.33e-28	1
GO:0043228 non-membrane-bounded organelle	8.82e-27	1
GO:0043232 intracellular non-membrane-bounded organelle	8.82e-27	1
GO:0044445 cytosolic part	4.13e-26	1
GO:1990904 ribonucleoprotein complex	4.99e-26	1
GO:0030529 intracellular ribonucleoprotein complex	4.99e-26	1
geneLen	1.98e-25	1
GO:0005840 ribosome	1.11e-20	1
GO:0006412 translation	2.16e-20	1
GO:0043043 peptide biosynthetic process	5.66e-20	1
GO:0022625 cytosolic large ribosomal subunit	2.56e-19	1
GO:0044391 ribosomal subunit	1.52e-18	1
GO:0006518 peptide metabolic process	1.74e-18	1
GO:0003735 structural constituent of ribosome	2.59e-18	1
GO:0005198 structural molecule activity	3.96e-18	1
GO:0003676 nucleic acid binding	1.31e-17	1
synthetic_genetic_interaction	1.7e-17	1
GO:0097159 organic cyclic compound binding	3.22e-17	1
GO:0043604 amide biosynthetic process	5.34e-17	1
GO:0003723 RNA binding	6.13e-17	1
GO:0032991 macromolecular complex	8.82e-17	1
GO:0010467 gene expression	2.39e-16	1
GO:1901363 heterocyclic compound binding	4.86e-16	1
GO:0009059 macromolecule biosynthetic process	2.13e-15	1
GO:0034645 cellular macromolecule biosynthetic process	3.52e-15	1
GO:0005488 binding	3.85e-15	1
suppressive_genetic_interaction	5.25e-15	1
GO:0043603 cellular amide metabolic process	5.47e-15	1
GO:0042254 ribosome biogenesis	2.86e-14	1
%Helical	9.91e-14	1
GO:0044271 cellular nitrogen compound biosynthetic process	2.22e-13	1
%AA_C	2.92e-13	1
GO:0015934 large ribosomal subunit	3e-13	1
GO:0030684 preribosome	8.13e-13	1
GO:0022613 ribonucleoprotein complex biogenesis	1.51e-12	1
median_IUPRED	4.15e-12	1
GO:0005829 cytosol	9.25e-12	1
%AA_W	1.51e-11	1
GO:0071840 cellular component organization or biogenesis	5.63e-11	1
GO:0017111 nucleoside-triphosphatase activity	1.05e-10	1
GO:0050794 regulation of cellular process	1.1e-10	1
GO:0050657 nucleic acid transport	2.14e-10	1
GO:0034641 cellular nitrogen compound metabolic process	2.22e-10	1
GO:0051236 establishment of RNA localization	5.16e-10	1
GO:0050658 RNA transport	5.16e-10	1
GO:0006403 RNA localization	5.23e-10	1
GO:0044085 cellular component biogenesis	5.53e-10	1
GO:0050789 regulation of biological process	5.53e-10	1
GO:0006913 nucleocytoplasmic transport	6.66e-10	1
GO:1901576 organic substance biosynthetic process	7.49e-10	1
GO:0051169 nuclear transport	8.57e-10	1
%AA_A	9.98e-10	1
GO:1901566 organonitrogen compound biosynthetic process	1.06e-09	1
GO:0016462 pyrophosphatase activity	1.1e-09	1
GO:0016817 hydrolase activity, acting on acid anhydrides	1.1e-09	1
GO:0016818 hydrolase activity, acting on acid anhydrides, in phosphorus-containing anhydrides	1.1e-09	1
GO:0022627 cytosolic small ribosomal subunit	1.11e-09	1
%AA_L	1.2e-09	1
GO:0030686 90S preribosome	1.25e-09	1
GO:0006807 nitrogen compound metabolic process	1.8e-09	1
GO:0030427 site of polarized growth	2.55e-09	1
GO:0009058 biosynthetic process	4.83e-09	1
GO:0016887 ATPase activity	5.62e-09	1
GO:0043170 macromolecule metabolic process	8.8e-09	1
GO:0044260 cellular macromolecule metabolic process	1.01e-08	1
GO:0019843 rRNA binding	1.22e-08	1
GO:0031323 regulation of cellular metabolic process	1.61e-08	1
GO:0070925 organelle assembly	1.78e-08	1
GO:0005933 cellular bud	2.96e-08	1
GO:0042274 ribosomal small subunit biogenesis	3.4e-08	1
GO:0044249 cellular biosynthetic process	3.65e-08	1
GO:1901564 organonitrogen compound metabolic process	4.7e-08	1
GO:0060255 regulation of macromolecule metabolic process	5.13e-08	1
GO:0042255 ribosome assembly	5.37e-08	1
GO:0019222 regulation of metabolic process	5.83e-08	1
GO:0015931 nucleobase-containing compound transport	6.6e-08	1
GO:0080090 regulation of primary metabolic process	7.14e-08	1
%AA_Y	8.99e-08	1
GO:0051171 regulation of nitrogen compound metabolic process	9.61e-08	1
GO:0006405 RNA export from nucleus	1.01e-07	1
GO:0065007 biological regulation	1.26e-07	1
GO:0051168 nuclear export	1.3e-07	1
GO:0003729 mRNA binding	1.55e-07	1
GO:0042273 ribosomal large subunit biogenesis	2.08e-07	1
GO:0016072 rRNA metabolic process	2.23e-07	1
GO:0044267 cellular protein metabolic process	2.32e-07	1
%AA_M	2.62e-07	1
GO:0036464 cytoplasmic ribonucleoprotein granule	2.65e-07	1
GO:0035770 ribonucleoprotein granule	2.65e-07	1
GO:0006417 regulation of translation	2.87e-07	1
GO:0071166 ribonucleoprotein complex localization	3.03e-07	1
GO:0010556 regulation of macromolecule biosynthetic process	3.08e-07	1
GO:0006364 rRNA processing	3.25e-07	1
additive_genetic_interaction	4.35e-07	1
GO:0030687 preribosome, large subunit precursor	4.89e-07	1
GO:0071944 cell periphery	5.28e-07	1
GO:0000278 mitotic cell cycle	5.37e-07	1
GO:0048518 positive regulation of biological process	5.53e-07	1
GO:0010608 posttranscriptional regulation of gene expression	5.75e-07	1
GO:0048522 positive regulation of cellular process	6.67e-07	1
GO:0034248 regulation of cellular amide metabolic process	6.82e-07	1
GO:0048523 negative regulation of cellular process	7.26e-07	1
GO:0000166 nucleotide binding	7.81e-07	1
GO:1901265 nucleoside phosphate binding	7.81e-07	1
GO:0033036 macromolecule localization	8.35e-07	1
GO:0044093 positive regulation of molecular function	8.48e-07	1
GO:0043085 positive regulation of catalytic activity	8.55e-07	1
GO:0032555 purine ribonucleotide binding	8.58e-07	1
GO:0035639 purine ribonucleoside triphosphate binding	8.58e-07	1
GO:2000112 regulation of cellular macromolecule biosynthetic process	8.58e-07	1
GO:0071426 ribonucleoprotein complex export from nucleus	8.8e-07	1
GO:0044429 mitochondrial part	8.83e-07	1
GO:0032268 regulation of cellular protein metabolic process	9.54e-07	1
GO:0017076 purine nucleotide binding	9.98e-07	1
GO:0006611 protein export from nucleus	1.1e-06	1
GO:0016043 cellular component organization	1.15e-06	1
GO:0005935 cellular bud neck	1.21e-06	1
GO:0051128 regulation of cellular component organization	1.31e-06	1
GO:0005886 plasma membrane	1.4e-06	1
GO:0071826 ribonucleoprotein complex subunit organization	1.5e-06	1
GO:0019538 protein metabolic process	1.52e-06	1
GO:0004386 helicase activity	1.67e-06	1
GO:0036094 small molecule binding	1.74e-06	1
GO:0051246 regulation of protein metabolic process	1.75e-06	1
GO:0031326 regulation of cellular biosynthetic process	1.79e-06	1
GO:0009889 regulation of biosynthetic process	1.79e-06	1
GO:1903047 mitotic cell cycle process	1.97e-06	1
GO:0010494 cytoplasmic stress granule	2.04e-06	1
GO:0050790 regulation of catalytic activity	2.09e-06	1
GO:0015935 small ribosomal subunit	2.1e-06	1
GO:0065009 regulation of molecular function	2.28e-06	1
GO:0006996 organelle organization	2.32e-06	1
Percent_SNPs	2.57e-06	1
GO:0032553 ribonucleotide binding	2.66e-06	1
GO:0010604 positive regulation of macromolecule metabolic process	2.68e-06	1
GO:0097367 carbohydrate derivative binding	3e-06	1
GO:0010468 regulation of gene expression	3.54e-06	1
GO:0051345 positive regulation of hydrolase activity	3.94e-06	1
GO:0048519 negative regulation of biological process	4.04e-06	1
GO:0009893 positive regulation of metabolic process	4.66e-06	1
GO:0008104 protein localization	5.59e-06	1
GO:0005856 cytoskeleton	5.7e-06	1
GO:0005934 cellular bud tip	6.22e-06	1
GO:0005937 mating projection	6.53e-06	1
GO:0031325 positive regulation of cellular metabolic process	6.91e-06	1
GO:0045934 negative regulation of nucleobase-containing compound metabolic process	7.37e-06	1
GO:0030490 maturation of SSU-rRNA	8.09e-06	1
GO:0042995 cell projection	8.09e-06	1
GO:0000131 incipient cellular bud site	8.18e-06	1
GO:0051172 negative regulation of nitrogen compound metabolic process	8.57e-06	1
GO:0043933 macromolecular complex subunit organization	9.25e-06	1
GO:0044238 primary metabolic process	9.48e-06	1
GO:0044463 cell projection part	9.49e-06	1
GO:0031224 intrinsic component of membrane	9.76e-06	1
GO:0007010 cytoskeleton organization	9.79e-06	1
GO:0008135 translation factor activity, RNA binding	1.09e-05	1
GO:0043168 anion binding	1.17e-05	1
GO:0051336 regulation of hydrolase activity	1.2e-05	1
GO:0043023 ribosomal large subunit binding	1.24e-05	1
GO:0042623 ATPase activity, coupled	1.3e-05	1
GO:0044425 membrane part	1.38e-05	1
GO:0071428 rRNA-containing ribonucleoprotein complex export from nucleus	1.52e-05	1
GO:0006414 translational elongation	1.69e-05	1
GO:0044710 single-organism metabolic process	1.74e-05	1
GO:0016021 integral component of membrane	1.77e-05	1
GO:0060341 regulation of cellular localization	1.82e-05	1
GO:0022618 ribonucleoprotein complex assembly	2.14e-05	1
GO:0019866 organelle inner membrane	2.47e-05	1
GO:0005938 cell cortex	2.58e-05	1
GO:0099568 cytoplasmic region	2.58e-05	1
GO:0032984 macromolecular complex disassembly	2.73e-05	1
%AA_I	2.91e-05	1
GO:0000462 maturation of SSU-rRNA from tricistronic rRNA transcript (SSU-rRNA, 5.8S rRNA, LSU-rRNA)	3.08e-05	1
GO:0043332 mating projection tip	3.08e-05	1
GO:0000027 ribosomal large subunit assembly	3.32e-05	1
GO:0044430 cytoskeletal part	3.66e-05	1
GO:0016070 RNA metabolic process	3.67e-05	1
GO:0003724 RNA helicase activity	3.71e-05	1
GO:0032880 regulation of protein localization	3.85e-05	1
GO:0005524 ATP binding	4.09e-05	1
GO:0032559 adenyl ribonucleotide binding	4.09e-05	1
GO:0005730 nucleolus	4.13e-05	1
GO:0030554 adenyl nucleotide binding	4.55e-05	1
GO:0070035 purine NTP-dependent helicase activity	4.7e-05	1
GO:0008026 ATP-dependent helicase activity	4.7e-05	1
GO:0005743 mitochondrial inner membrane	5.1e-05	1
GO:0051641 cellular localization	5.13e-05	1
GO:0005844 polysome	6.07e-05	1
GO:0051253 negative regulation of RNA metabolic process	7.44e-05	1
GO:0051276 chromosome organization	7.75e-05	1
GO:0043547 positive regulation of GTPase activity	8.05e-05	1
GO:0051225 spindle assembly	8.19e-05	1
GO:0043087 regulation of GTPase activity	8.3e-05	1
GO:0042886 amide transport	8.62e-05	1
GO:0034470 ncRNA processing	9.04e-05	1
GO:0051173 positive regulation of nitrogen compound metabolic process	9.05e-05	1
GO:0007049 cell cycle	9.13e-05	1
3UTR_PARS_RNAstructure	9.16e-05	1
GO:1902593 single-organism nuclear import	9.34e-05	1
GO:0051170 nuclear import	9.34e-05	1
GO:0071704 organic substance metabolic process	9.72e-05	1
GO:0022607 cellular component assembly	9.9e-05	1
GO:0005740 mitochondrial envelope	0.000101613	1
GO:1902582 single-organism intracellular transport	0.000112091	1
GO:0032879 regulation of localization	0.000137398	1
GO:2001251 negative regulation of chromosome organization	0.000137714	1
GO:0010605 negative regulation of macromolecule metabolic process	0.00013934	1
GO:0010558 negative regulation of macromolecule biosynthetic process	0.000145276	1
GO:0031324 negative regulation of cellular metabolic process	0.000161973	1
GO:0051301 cell division	0.000173937	1
GO:0044237 cellular metabolic process	0.000176753	1
GO:0050793 regulation of developmental process	0.000180505	1
GO:1903827 regulation of cellular protein localization	0.000201029	1
GO:2000113 negative regulation of cellular macromolecule biosynthetic process	0.000224928	1
GO:0019219 regulation of nucleobase-containing compound metabolic process	0.000233688	1
GO:0051188 cofactor biosynthetic process	0.000237523	1
GO:0010628 positive regulation of gene expression	0.000254318	1
GO:0022411 cellular component disassembly	0.000258371	1
GO:0033043 regulation of organelle organization	0.000281161	1
GO:0044448 cell cortex part	0.000294117	1
GO:0000028 ribosomal small subunit assembly	0.000300048	1
GO:0090304 nucleic acid metabolic process	0.000306601	1
GO:1902580 single-organism cellular localization	0.000317312	1
GO:0043241 protein complex disassembly	0.0003322	1
GO:0043624 cellular protein complex disassembly	0.0003322	1
GO:0007264 small GTPase mediated signal transduction	0.000335073	1
GO:0010639 negative regulation of organelle organization	0.000338289	1
GO:0003682 chromatin binding	0.000346139	1
GO:0044446 intracellular organelle part	0.000356541	1
GO:0031966 mitochondrial membrane	0.000357158	1
GO:0098772 molecular function regulator	0.000360104	1
GO:0030100 regulation of endocytosis	0.000374299	1
GO:0000022 mitotic spindle elongation	0.000374299	1
GO:0051231 spindle elongation	0.000374299	1
GO:0000470 maturation of LSU-rRNA	0.000379826	1
GO:0070727 cellular macromolecule localization	0.000388036	1
GO:0015833 peptide transport	0.000395791	1
GO:0051029 rRNA transport	0.000403396	1
GO:0006407 rRNA export from nucleus	0.000403396	1
GO:0051649 establishment of localization in cell	0.000411432	1
GO:0009892 negative regulation of metabolic process	0.000425124	1
GO:0006139 nucleobase-containing compound metabolic process	0.000428447	1
GO:0044422 organelle part	0.000428859	1
GO:0004004 ATP-dependent RNA helicase activity	0.000450743	1
GO:0008186 RNA-dependent ATPase activity	0.000450743	1
GO:0010629 negative regulation of gene expression	0.000451674	1
GO:0071705 nitrogen compound transport	0.000460792	1
GO:0045935 positive regulation of nucleobase-containing compound metabolic process	0.000469295	1
GO:0031090 organelle membrane	0.000476269	1
GO:0015031 protein transport	0.000498787	1
GO:0006396 RNA processing	0.000525348	1
GO:0035023 regulation of Rho protein signal transduction	0.000530001	1
GO:0032071 regulation of endodeoxyribonuclease activity	0.00054695	1
GO:0032079 positive regulation of endodeoxyribonuclease activity	0.00054695	1
GO:0051656 establishment of organelle localization	0.000551706	1
GO:0043565 sequence-specific DNA binding	0.000551967	1
GO:0022402 cell cycle process	0.000593368	1
GO:1902531 regulation of intracellular signal transduction	0.000611945	1
GO:0010557 positive regulation of macromolecule biosynthetic process	0.000635579	1
Num_SNPs	0.000661105	1
GO:0044444 cytoplasmic part	0.000669815	1
GO:1902679 negative regulation of RNA biosynthetic process	0.000677299	1
GO:1903507 negative regulation of nucleic acid-templated transcription	0.000677299	1
GO:0044877 macromolecular complex binding	0.000677784	1
GO:0030011 maintenance of cell polarity	0.000682796	1
GO:0006808 regulation of nitrogen utilization	0.000682796	1
GO:0006606 protein import into nucleus	0.000698849	1
GO:0007154 cell communication	0.000732579	1
GO:0051640 organelle localization	0.000732632	1
GO:0033044 regulation of chromosome organization	0.000739309	1
GO:0031328 positive regulation of cellular biosynthetic process	0.000746207	1
GO:0009891 positive regulation of biosynthetic process	0.000746207	1
GO:0045184 establishment of protein localization	0.000772051	1
GO:0033750 ribosome localization	0.000779547	1
GO:0000463 maturation of LSU-rRNA from tricistronic rRNA transcript (SSU-rRNA, 5.8S rRNA, LSU-rRNA)	0.000779547	1
GO:0016874 ligase activity	0.000798077	1
GO:0043167 ion binding	0.000821321	1
GO:0009890 negative regulation of biosynthetic process	0.000833896	1
GO:0031327 negative regulation of cellular biosynthetic process	0.000833896	1
GO:0006448 regulation of translational elongation	0.000840594	1
GO:0003743 translation initiation factor activity	0.000860865	1
GO:0044744 protein targeting to nucleus	0.000887503	1
GO:0051028 mRNA transport	0.000938719	1
GO:0034660 ncRNA metabolic process	0.000966186	1
GO:0051254 positive regulation of RNA metabolic process	0.000968043	1
GO:0000910 cytokinesis	0.0009876	1
GO:0045892 negative regulation of transcription, DNA-templated	0.00100965	1
GO:0034622 cellular macromolecular complex assembly	0.00102248	1
GO:0005085 guanyl-nucleotide exchange factor activity	0.00111045	1
GO:0005853 eukaryotic translation elongation factor 1 complex	0.00114519	1
GO:0000060 protein import into nucleus, translocation	0.00114519	1
GO:0032995 regulation of fungal-type cell wall biogenesis	0.00114519	1
GO:0007163 establishment or maintenance of cell polarity	0.00114691	1
GO:0051252 regulation of RNA metabolic process	0.00115583	1
GO:0003727 single-stranded RNA binding	0.00115682	1
GO:0048309 endoplasmic reticulum inheritance	0.00115682	1
GO:0046031 ADP metabolic process	0.00115821	1
GO:0051179 localization	0.00120115	1
GO:0046907 intracellular transport	0.00121445	1
GO:0071103 DNA conformation change	0.00125513	1
GO:0015630 microtubule cytoskeleton	0.00130629	1
GO:0030695 GTPase regulator activity	0.00139314	1
GO:0034613 cellular protein localization	0.00141096	1
GO:0090307 mitotic spindle assembly	0.00150486	1
GO:0032077 positive regulation of deoxyribonuclease activity	0.00150486	1
GO:0046677 response to antibiotic	0.00150486	1
GO:0008142 oxysterol binding	0.00150486	1
GO:0060963 positive regulation of ribosomal protein gene transcription from RNA polymerase II promoter	0.00150486	1
GO:0032070 regulation of deoxyribonuclease activity	0.00150486	1
GO:0033218 amide binding	0.00157228	1
GO:0009179 purine ribonucleoside diphosphate metabolic process	0.0016159	1
GO:0009135 purine nucleoside diphosphate metabolic process	0.0016159	1
GO:0009185 ribonucleoside diphosphate metabolic process	0.0016159	1
GO:0071702 organic substance transport	0.00163566	1
GO:0044700 single organism signaling	0.00172147	1
GO:0007165 signal transduction	0.00172147	1
GO:0023052 signaling	0.00172147	1
GO:0045937 positive regulation of phosphate metabolic process	0.00175588	1
GO:0046578 regulation of Ras protein signal transduction	0.00184721	1
GO:0051056 regulation of small GTPase mediated signal transduction	0.00184721	1
GO:0006415 translational termination	0.00184721	1
GO:0032153 cell division site	0.00186233	1
SNP-MODERATE	0.00197202	1
GO:0055114 oxidation-reduction process	0.0019899	1
GO:0070180 large ribosomal subunit rRNA binding	0.00199381	1
GO:0032185 septin cytoskeleton organization	0.00207264	1
GO:0003824 catalytic activity	0.00210826	1
GO:0051129 negative regulation of cellular component organization	0.00212674	1
GO:1903311 regulation of mRNA metabolic process	0.00217449	1
GO:0001558 regulation of cell growth	0.00217449	1
Percent_AAChanges	0.00220083	1
GO:0006450 regulation of translational fidelity	0.00220575	1
GO:0042277 peptide binding	0.00220575	1
SNP-LOW	0.00224388	1
GO:0051174 regulation of phosphorus metabolic process	0.00224802	1
GO:0019220 regulation of phosphate metabolic process	0.00224802	1
GO:0006520 cellular amino acid metabolic process	0.0022577	1
GO:0033753 establishment of ribosome localization	0.00236865	1
GO:0000054 ribosomal subunit export from nucleus	0.00236865	1
GO:1902680 positive regulation of RNA biosynthetic process	0.00243819	1
GO:1903508 positive regulation of nucleic acid-templated transcription	0.00243819	1
GO:0045893 positive regulation of transcription, DNA-templated	0.00243819	1
GO:0065003 macromolecular complex assembly	0.00245958	1
GO:0006351 transcription, DNA-templated	0.00251357	1
GO:0097659 nucleic acid-templated transcription	0.00251357	1
GO:0007584 response to nutrient	0.00252701	1
GO:0031670 cellular response to nutrient	0.00252701	1
GO:0010562 positive regulation of phosphorus metabolic process	0.00257855	1
GO:0007051 spindle organization	0.00269218	1
Num_AAChanges	0.00279344	1
GO:0000920 cell separation after cytokinesis	0.00280975	1
GO:0006446 regulation of translational initiation	0.00280975	1
GO:2000220 regulation of pseudohyphal growth	0.00280975	1
GO:0008152 metabolic process	0.00286146	1
GO:0045860 positive regulation of protein kinase activity	0.00295229	1
GO:0043244 regulation of protein complex disassembly	0.0030485	1
GO:0005634 nucleus	0.00306466	1
GO:0032549 ribonucleoside binding	0.00310946	1
GO:0034504 protein localization to nucleus	0.00312015	1
GO:0005874 microtubule	0.00312015	1
GO:0000122 negative regulation of transcription from RNA polymerase II promoter	0.00312594	1
GO:0008139 nuclear localization sequence binding	0.0032214	1
GO:0005092 GDP-dissociation inhibitor activity	0.0032214	1
GO:0032075 positive regulation of nuclease activity	0.0032214	1
GO:0045807 positive regulation of endocytosis	0.0032214	1
%AA_R	0.00333221	1
GO:0032774 RNA biosynthetic process	0.00334111	1
GO:0003746 translation elongation factor activity	0.0033434	1
GO:0001882 nucleoside binding	0.00334837	1
GO:0043227 membrane-bounded organelle	0.00343358	1
GO:0043231 intracellular membrane-bounded organelle	0.00343358	1
GO:0035556 intracellular signal transduction	0.0034964	1
GO:0000819 sister chromatid segregation	0.00363566	1
GO:0044428 nuclear part	0.00371489	1
GO:0051049 regulation of transport	0.00371643	1
%AA_F	0.00375961	1
GO:0032040 small-subunit processome	0.00379351	1
GO:2000816 negative regulation of mitotic sister chromatid separation	0.00388181	1
GO:0071174 mitotic spindle checkpoint	0.00388181	1
GO:0009132 nucleoside diphosphate metabolic process	0.00388181	1
GO:1902100 negative regulation of metaphase/anaphase transition of cell cycle	0.00388181	1
GO:0045841 negative regulation of mitotic metaphase/anaphase transition	0.00388181	1
GO:0033674 positive regulation of kinase activity	0.00388181	1
GO:0031577 spindle checkpoint	0.00388181	1
GO:0009108 coenzyme biosynthetic process	0.00391885	1
GO:0015711 organic anion transport	0.00394823	1
GO:0006757 ATP generation from ADP	0.00410376	1
GO:0070201 regulation of establishment of protein localization	0.00410376	1
GO:1903338 regulation of cell wall organization or biogenesis	0.00410376	1
GO:0006096 glycolytic process	0.00410376	1
GO:0042026 protein refolding	0.00410376	1
GO:0006357 regulation of transcription from RNA polymerase II promoter	0.00415883	1
GO:0070784 regulation of growth of unicellular organism as a thread of attached cells	0.00416768	1
GO:0035621 ER to Golgi ceramide transport	0.00422282	1
GO:0005545 1-phosphatidylinositol binding	0.00422282	1
GO:0050686 negative regulation of mRNA processing	0.00422282	1
GO:0000073 spindle pole body separation	0.00422282	1
GO:0031440 regulation of mRNA 3'-end processing	0.00422282	1
GO:0006404 RNA import into nucleus	0.00422282	1
GO:1903312 negative regulation of mRNA metabolic process	0.00422282	1
GO:0035627 ceramide transport	0.00422282	1
GO:0009605 response to external stimulus	0.004367	1
GO:0005819 spindle	0.00447907	1
GO:0006333 chromatin assembly or disassembly	0.00447907	1
GO:1903506 regulation of nucleic acid-templated transcription	0.0045554	1
GO:2001141 regulation of RNA biosynthetic process	0.0045554	1
GO:0000070 mitotic sister chromatid segregation	0.0047928	1
GO:0006886 intracellular protein transport	0.00485438	1
GO:0007088 regulation of mitotic nuclear division	0.00501522	1
GO:0033048 negative regulation of mitotic sister chromatid segregation	0.00502207	1
GO:0040029 regulation of gene expression, epigenetic	0.00506099	1
GO:0003677 DNA binding	0.00510414	1
GO:0031369 translation initiation factor binding	0.00524384	1
GO:0007265 Ras protein signal transduction	0.00524384	1
GO:0051304 chromosome separation	0.00524384	1
GO:0019001 guanyl nucleotide binding	0.0052763	1
GO:0005525 GTP binding	0.0052763	1
GO:0001883 purine nucleoside binding	0.0052763	1
GO:0032550 purine ribonucleoside binding	0.0052763	1
GO:0032561 guanyl ribonucleotide binding	0.0052763	1
GO:0031981 nuclear lumen	0.00528212	1
GO:0045990 carbon catabolite regulation of transcription	0.00545917	1
GO:0005759 mitochondrial matrix	0.00553697	1
GO:0045991 carbon catabolite activation of transcription	0.00557209	1
GO:0010501 RNA secondary structure unwinding	0.00557209	1
GO:0031023 microtubule organizing center organization	0.00557209	1
GO:0006413 translational initiation	0.00559368	1
GO:0043021 ribonucleoprotein complex binding	0.00559368	1
GO:0099080 supramolecular complex	0.00578954	1
GO:0008094 DNA-dependent ATPase activity	0.00578954	1
GO:0099512 supramolecular fiber	0.00578954	1
GO:0099513 polymeric cytoskeletal fiber	0.00578954	1
GO:0099081 supramolecular polymer	0.00578954	1
GO:0006165 nucleoside diphosphate phosphorylation	0.0057906	1
GO:0022604 regulation of cell morphogenesis	0.0057906	1
GO:0030865 cortical cytoskeleton organization	0.0057906	1
GO:0030866 cortical actin cytoskeleton organization	0.0057906	1
GO:0006355 regulation of transcription, DNA-templated	0.00580426	1
GO:0015248 sterol transporter activity	0.0059128	1
GO:0097271 protein localization to bud neck	0.0059128	1
GO:0032069 regulation of nuclease activity	0.0059128	1
GO:0032934 sterol binding	0.0059128	1
GO:0090522 vesicle tethering involved in exocytosis	0.0059128	1
GO:0043614 multi-eIF complex	0.0059128	1
GO:0005496 steroid binding	0.0059128	1
GO:0006399 tRNA metabolic process	0.00606737	1
GO:0006725 cellular aromatic compound metabolic process	0.0061463	1
GO:0051985 negative regulation of chromosome segregation	0.00640199	0
GO:0033046 negative regulation of sister chromatid segregation	0.00640199	0
GO:1902494 catalytic complex	0.00665508	0
GO:0001934 positive regulation of protein phosphorylation	0.00675403	0
GO:0005096 GTPase activator activity	0.00677939	0
GO:0006323 DNA packaging	0.00677939	0
GO:0000932 P-body	0.00677939	0
GO:0031667 response to nutrient levels	0.00709339	0
GO:0006325 chromatin organization	0.00727523	0
GO:0005200 structural constituent of cytoskeleton	0.00730293	0
GO:0007117 budding cell bud growth	0.00730293	0
GO:0032506 cytokinetic process	0.00730293	0
GO:0032270 positive regulation of cellular protein metabolic process	0.00739527	0
GO:0005515 protein binding	0.00771755	0
GO:0003700 transcription factor activity, sequence-specific DNA binding	0.00771814	0
GO:0006094 gluconeogenesis	0.00779823	0
GO:0030261 chromosome condensation	0.00779823	0
GO:0019319 hexose biosynthetic process	0.00779823	0
GO:0032147 activation of protein kinase activity	0.00779823	0
GO:0060589 nucleoside-triphosphatase regulator activity	0.00788725	0
GO:0006790 sulfur compound metabolic process	0.00799466	0
GO:0000049 tRNA binding	0.00805127	0
GO:0032155 cell division site part	0.00805127	0
GO:0006090 pyruvate metabolic process	0.00805127	0
GO:0051347 positive regulation of transferase activity	0.00805127	0
GO:0007029 endoplasmic reticulum organization	0.00805127	0
GO:1901605 alpha-amino acid metabolic process	0.00842383	0
GO:0007346 regulation of mitotic cell cycle	0.00864108	0
GO:0007059 chromosome segregation	0.00871154	0
GO:0007017 microtubule-based process	0.00906233	0
GO:0008047 enzyme activator activity	0.00910249	0
GO:0051050 positive regulation of transport	0.00940176	0
GO:0098813 nuclear chromosome segregation	0.009462	0
GO:0070717 poly-purine tract binding	0.00973662	0
GO:0033290 eukaryotic 48S preinitiation complex	0.00973662	0
GO:0032545 CURI complex	0.00973662	0
GO:0051094 positive regulation of developmental process	0.00973662	0
GO:0008143 poly(A) binding	0.00973662	0
GO:0000145 exocyst	0.00977088	0
GO:0050684 regulation of mRNA processing	0.00977088	0
GO:0060962 regulation of ribosomal protein gene transcription from RNA polymerase II promoter	0.00977088	0
GO:0051051 negative regulation of transport	0.00977088	0
GO:0000142 cellular bud neck contractile ring	0.00977088	0
GO:0044281 small molecule metabolic process	0.0100159	0
GO:0042327 positive regulation of phosphorylation	0.0100361	0
GO:0061640 cytoskeleton-dependent cytokinesis	0.0100781	0
GO:0016741 transferase activity, transferring one-carbon groups	0.0101841	0
GO:0032259 methylation	0.0102415	0
GO:0005815 microtubule organizing center	0.0102534	0
GO:0051300 spindle pole body organization	0.0105896	0
GO:0031936 negative regulation of chromatin silencing	0.0105896	0
GO:0030234 enzyme regulator activity	0.0109033	0
GO:0032950 regulation of beta-glucan metabolic process	0.0109687	0
GO:2000431 regulation of cytokinesis, actomyosin contractile ring assembly	0.0109687	0
GO:1900363 regulation of mRNA polyadenylation	0.0109687	0
GO:0043558 regulation of translational initiation in response to stress	0.0109687	0
GO:1901901 regulation of protein localization to cell division site involved in cytokinesis	0.0109687	0
GO:0061421 positive regulation of transcription by oleic acid	0.0109687	0
GO:0001965 G-protein alpha-subunit binding	0.0109687	0
GO:0035617 stress granule disassembly	0.0109687	0
GO:2000433 positive regulation of cytokinesis, actomyosin contractile ring assembly	0.0109687	0
GO:0005835 fatty acid synthase complex	0.0109687	0
GO:0032951 regulation of beta-glucan biosynthetic process	0.0109687	0
GO:0005641 nuclear envelope lumen	0.0109687	0
GO:2000395 regulation of ubiquitin-dependent endocytosis	0.0109687	0
GO:0006610 ribosomal protein import into nucleus	0.0109687	0
GO:2000397 positive regulation of ubiquitin-dependent endocytosis	0.0109687	0
GO:0042788 polysomal ribosome	0.0109687	0
GO:0042759 long-chain fatty acid biosynthetic process	0.0109687	0
GO:0000212 meiotic spindle organization	0.0109687	0
GO:0044611 nuclear pore inner ring	0.0109687	0
GO:0032953 regulation of (1->3)-beta-D-glucan biosynthetic process	0.0109687	0
GO:0090334 regulation of cell wall (1->3)-beta-D-glucan biosynthetic process	0.0109687	0
GO:0070262 peptidyl-serine dephosphorylation	0.0109687	0
GO:0008105 asymmetric protein localization	0.0109687	0
GO:0031384 regulation of initiation of mating projection growth	0.0109687	0
GO:1900364 negative regulation of mRNA polyadenylation	0.0109687	0
GO:1903499 regulation of mitotic actomyosin contractile ring assembly	0.0109687	0
GO:0005850 eukaryotic translation initiation factor 2 complex	0.0109687	0
GO:0004321 fatty-acyl-CoA synthase activity	0.0109687	0
GO:1903501 positive regulation of mitotic actomyosin contractile ring assembly	0.0109687	0
GO:0010981 regulation of cell wall macromolecule metabolic process	0.0109687	0
GO:0061163 endoplasmic reticulum polarization	0.0109687	0
GO:0060178 regulation of exocyst localization	0.0109687	0
GO:0061429 positive regulation of transcription from RNA polymerase II promoter by oleic acid	0.0109687	0
GO:0031441 negative regulation of mRNA 3'-end processing	0.0109687	0
GO:0032952 regulation of (1->3)-beta-D-glucan metabolic process	0.0109687	0
GO:1901900 regulation of protein localization to cell division site	0.0109687	0
GO:0051255 spindle midzone assembly	0.0109687	0
GO:0051493 regulation of cytoskeleton organization	0.011023	0
GO:0031669 cellular response to nutrient levels	0.0110791	0
GO:0051223 regulation of protein transport	0.0111043	0
GO:0036442 hydrogen-exporting ATPase activity	0.0111043	0
GO:0005789 endoplasmic reticulum membrane	0.0111593	0
GO:0051247 positive regulation of protein metabolic process	0.0117635	0
GO:0009987 cellular process	0.0118069	0
GO:0046483 heterocycle metabolic process	0.0118801	0
GO:0031106 septin ring organization	0.0119099	0
GO:0048583 regulation of response to stimulus	0.0122352	0
GO:0001403 invasive growth in response to glucose limitation	0.0122784	0
GO:0031935 regulation of chromatin silencing	0.0122784	0
GO:0032392 DNA geometric change	0.0122784	0
GO:0055076 transition metal ion homeostasis	0.0124615	0
GO:0051234 establishment of localization	0.0130492	0
%AA_K	0.0130999	0
GO:0009205 purine ribonucleoside triphosphate metabolic process	0.0133755	0
GO:0016020 membrane	0.0136406	0
GO:0032386 regulation of intracellular transport	0.0138216	0
GO:0000055 ribosomal large subunit export from nucleus	0.0138216	0
GO:0005048 signal sequence binding	0.0138216	0
GO:0045815 positive regulation of gene expression, epigenetic	0.0138216	0
GO:0031491 nucleosome binding	0.0138216	0
GO:0060969 negative regulation of gene silencing	0.0138216	0
GO:0005783 endoplasmic reticulum	0.0138991	0
GO:0009144 purine nucleoside triphosphate metabolic process	0.0140838	0
GO:0006811 ion transport	0.0141472	0
GO:0006810 transport	0.0142982	0
GO:0016491 oxidoreductase activity	0.0143	0
GO:0007114 cell budding	0.0143947	0
GO:0019954 asexual reproduction	0.0143947	0
GO:0042325 regulation of phosphorylation	0.0148012	0
GO:0051783 regulation of nuclear division	0.0148012	0
GO:0007052 mitotic spindle organization	0.0148676	0
GO:0032508 DNA duplex unwinding	0.0148676	0
GO:0007096 regulation of exit from mitosis	0.0148676	0
GO:0060968 regulation of gene silencing	0.0149162	0
GO:0045839 negative regulation of mitotic nuclear division	0.0149162	0
GO:0051307 meiotic chromosome separation	0.0149556	0
GO:1900151 regulation of nuclear-transcribed mRNA catabolic process, deadenylation-dependent decay	0.0149556	0
GO:0032126 eisosome	0.0149556	0
GO:0009199 ribonucleoside triphosphate metabolic process	0.0149656	0
GO:0046364 monosaccharide biosynthetic process	0.0152516	0
GO:0044275 cellular carbohydrate catabolic process	0.0152516	0
GO:1901987 regulation of cell cycle phase transition	0.0160256	0
GO:1901990 regulation of mitotic cell cycle phase transition	0.0160256	0
GO:0001071 nucleic acid binding transcription factor activity	0.0163572	0
GO:0000281 mitotic cytokinesis	0.0163803	0
GO:0010564 regulation of cell cycle process	0.0167922	0
GO:1901360 organic cyclic compound metabolic process	0.0171733	0
GO:0009991 response to extracellular stimulus	0.0173403	0
GO:0044432 endoplasmic reticulum part	0.017547	0
GO:0005876 spindle microtubule	0.0176831	0
GO:1990234 transferase complex	0.0178882	0
GO:1902850 microtubule cytoskeleton organization involved in mitosis	0.0179425	0
GO:0036267 invasive filamentous growth	0.0179425	0
GO:0051781 positive regulation of cell division	0.0179684	0
GO:0005828 kinetochore microtubule	0.0179684	0
GO:0070086 ubiquitin-dependent endocytosis	0.0179684	0
GO:0000782 telomere cap complex	0.0179684	0
GO:0016584 nucleosome positioning	0.0179684	0
GO:0031428 box C/D snoRNP complex	0.0179684	0
GO:1990841 promoter-specific chromatin binding	0.0179684	0
GO:0030428 cell septum	0.0179684	0
GO:0070993 translation preinitiation complex	0.0179684	0
GO:0005621 cellular bud scar	0.0179684	0
GO:0007105 cytokinesis, site selection	0.0179684	0
GO:0006449 regulation of translational termination	0.0179684	0
GO:0035306 positive regulation of dephosphorylation	0.0179684	0
GO:0005880 nuclear microtubule	0.0179684	0
GO:0032467 positive regulation of cytokinesis	0.0179684	0
GO:0034990 nuclear mitotic cohesin complex	0.0179684	0
GO:0030892 mitotic cohesin complex	0.0179684	0
GO:0033101 cellular bud membrane	0.0179684	0
GO:0005813 centrosome	0.0179684	0
GO:0000783 nuclear telomere cap complex	0.0179684	0
GO:0001400 mating projection base	0.0179684	0
GO:0032186 cellular bud neck septin ring organization	0.0179684	0
GO:1905268 negative regulation of chromatin organization	0.0183135	0
GO:1900428 regulation of filamentous growth of a population of unicellular organisms	0.0183135	0
GO:1990837 sequence-specific double-stranded DNA binding	0.0187395	0
GO:0000982 transcription factor activity, RNA polymerase II core promoter proximal region sequence-specific binding	0.0195168	0
GO:0031123 RNA 3'-end processing	0.0198418	0
GO:0046903 secretion	0.0198418	0
GO:0032940 secretion by cell	0.0198418	0
GO:0031109 microtubule polymerization or depolymerization	0.0203189	0
GO:0005940 septin ring	0.0203189	0
GO:0007018 microtubule-based movement	0.0203189	0
GO:0051031 tRNA transport	0.0203189	0
GO:0046034 ATP metabolic process	0.0204874	0
GO:0016740 transferase activity	0.0207075	0
GO:0045944 positive regulation of transcription from RNA polymerase II promoter	0.0208275	0
GO:0008168 methyltransferase activity	0.0208929	0
GO:0005643 nuclear pore	0.0210077	0
GO:0016757 transferase activity, transferring glycosyl groups	0.0213001	0
GO:0045333 cellular respiration	0.0213001	0
GO:1902099 regulation of metaphase/anaphase transition of cell cycle	0.0213851	0
GO:0030071 regulation of mitotic metaphase/anaphase transition	0.0213851	0
GO:0002183 cytoplasmic translational initiation	0.0215911	0
GO:0061013 regulation of mRNA catabolic process	0.0215911	0
GO:0099022 vesicle tethering	0.0215911	0
GO:0070938 contractile ring	0.0215911	0
GO:0005826 actomyosin contractile ring	0.0215911	0
GO:0061587 transfer RNA gene-mediated silencing	0.0215911	0
GO:0000226 microtubule cytoskeleton organization	0.021696	0
GO:0042175 nuclear outer membrane-endoplasmic reticulum membrane network	0.0219279	0
GO:0044770 cell cycle phase transition	0.0219922	0
GO:0044772 mitotic cell cycle phase transition	0.0219922	0
GO:0032543 mitochondrial translation	0.0220425	0
GO:0046939 nucleotide phosphorylation	0.0222248	0
GO:0022603 regulation of anatomical structure morphogenesis	0.0222248	0
GO:0003678 DNA helicase activity	0.0222248	0
GO:0031124 mRNA 3'-end processing	0.0222841	0
GO:0001077 transcriptional activator activity, RNA polymerase II core promoter proximal region sequence-specific binding	0.0225163	0
%AA_Q	0.0227483	0
GO:0031401 positive regulation of protein modification process	0.0244363	0
GO:0006997 nucleus organization	0.0244363	0
GO:0044765 single-organism transport	0.0247724	0
GO:0005543 phospholipid binding	0.0248472	0
GO:0030029 actin filament-based process	0.0248472	0
GO:0010965 regulation of mitotic sister chromatid separation	0.0252705	0
GO:0040008 regulation of growth	0.0252705	0
GO:0043234 protein complex	0.0262948	0
GO:0009311 oligosaccharide metabolic process	0.0263723	0
GO:0007094 mitotic spindle assembly checkpoint	0.0263723	0
GO:0090087 regulation of peptide transport	0.0263723	0
GO:0004003 ATP-dependent DNA helicase activity	0.0263723	0
GO:0071173 spindle assembly checkpoint	0.0263723	0
GO:0006999 nuclear pore organization	0.0263723	0
GO:0044272 sulfur compound biosynthetic process	0.0263786	0
GO:0030863 cortical cytoskeleton	0.0266238	0
GO:0005739 mitochondrion	0.0267105	0
GO:0046916 cellular transition metal ion homeostasis	0.0267476	0
GO:0003924 GTPase activity	0.0268011	0
GO:0010570 regulation of filamentous growth	0.0268127	0
GO:0006820 anion transport	0.0270861	0
GO:1902589 single-organism organelle organization	0.0272771	0
GO:0005816 spindle pole body	0.0284349	0
GO:0006338 chromatin remodeling	0.0284349	0
GO:0005635 nuclear envelope	0.0284958	0
GO:0051219 phosphoprotein binding	0.0290286	0
GO:0001731 formation of translation preinitiation complex	0.0290286	0
GO:1902275 regulation of chromatin organization	0.0292409	0
GO:0040007 growth	0.0292845	0
GO:0000075 cell cycle checkpoint	0.0297577	0
GO:0030295 protein kinase activator activity	0.0297648	0
GO:0060237 regulation of fungal-type cell wall organization	0.0297648	0
GO:0032988 ribonucleoprotein complex disassembly	0.0297648	0
GO:0019209 kinase activator activity	0.0297648	0
GO:0006903 vesicle targeting	0.0297648	0
GO:0031490 chromatin DNA binding	0.0297648	0
GO:0006607 NLS-bearing protein import into nucleus	0.0297648	0
GO:0031429 box H/ACA snoRNP complex	0.0306158	0
GO:0022829 wide pore channel activity	0.0306158	0
GO:2000197 regulation of ribonucleoprotein complex localization	0.0306158	0
GO:0032387 negative regulation of intracellular transport	0.0306158	0
GO:1903828 negative regulation of cellular protein localization	0.0306158	0
GO:0000146 microfilament motor activity	0.0306158	0
GO:0072363 regulation of glycolytic process by positive regulation of transcription from RNA polymerase II promoter	0.0306158	0
GO:0042992 negative regulation of transcription factor import into nucleus	0.0306158	0
GO:0033592 RNA strand annealing activity	0.0306158	0
GO:0008574 ATP-dependent microtubule motor activity, plus-end-directed	0.0306158	0
GO:0051083 'de novo' cotranslational protein folding	0.0306158	0
GO:0010455 positive regulation of cell fate commitment	0.0306158	0
GO:0090036 regulation of protein kinase C signaling	0.0306158	0
GO:0046898 response to cycloheximide	0.0306158	0
GO:0031496 positive regulation of mating type switching	0.0306158	0
GO:1902906 proteasome storage granule assembly	0.0306158	0
GO:0007019 microtubule depolymerization	0.0306158	0
GO:1904950 negative regulation of establishment of protein localization	0.0306158	0
GO:0045597 positive regulation of cell differentiation	0.0306158	0
GO:0016929 SUMO-specific protease activity	0.0306158	0
GO:0004314 [acyl-carrier-protein] S-malonyltransferase activity	0.0306158	0
GO:0072361 regulation of glycolytic process by regulation of transcription from RNA polymerase II promoter	0.0306158	0
GO:0045923 positive regulation of fatty acid metabolic process	0.0306158	0
GO:0010032 meiotic chromosome condensation	0.0306158	0
GO:0043335 protein unfolding	0.0306158	0
GO:0010672 regulation of transcription from RNA polymerase II promoter involved in meiotic cell cycle	0.0306158	0
GO:0051224 negative regulation of protein transport	0.0306158	0
GO:0045298 tubulin complex	0.0306158	0
GO:0031055 chromatin remodeling at centromere	0.0306158	0
GO:0031370 eukaryotic initiation factor 4G binding	0.0306158	0
GO:0031111 negative regulation of microtubule polymerization or depolymerization	0.0306158	0
GO:0001178 regulation of transcriptional start site selection at RNA polymerase II promoter	0.0306158	0
GO:0046823 negative regulation of nucleocytoplasmic transport	0.0306158	0
GO:0035719 tRNA import into nucleus	0.0306158	0
GO:0016419 S-malonyltransferase activity	0.0306158	0
GO:0035024 negative regulation of Rho protein signal transduction	0.0306158	0
GO:0090317 negative regulation of intracellular protein transport	0.0306158	0
GO:1900181 negative regulation of protein localization to nucleus	0.0306158	0
GO:0046930 pore complex	0.0306158	0
GO:0016420 malonyltransferase activity	0.0306158	0
GO:0031383 regulation of mating projection assembly	0.0306158	0
GO:0010521 telomerase inhibitor activity	0.0306158	0
GO:0097617 annealing activity	0.0306158	0
GO:0072588 box H/ACA RNP complex	0.0306158	0
GO:0015288 porin activity	0.0306158	0
GO:0016926 protein desumoylation	0.0306158	0
GO:1904590 negative regulation of protein import	0.0306158	0
GO:0071256 translocon complex	0.0306158	0
GO:0042308 negative regulation of protein import into nucleus	0.0306158	0
GO:0016787 hydrolase activity	0.0309167	0
GO:0005761 mitochondrial ribosome	0.0310165	0
GO:0000313 organellar ribosome	0.0310165	0
GO:0044452 nucleolar part	0.0314042	0
GO:0051053 negative regulation of DNA metabolic process	0.0319296	0
GO:0000429 carbon catabolite regulation of transcription from RNA polymerase II promoter	0.0319296	0
GO:0006006 glucose metabolic process	0.0319296	0
GO:0030004 cellular monovalent inorganic cation homeostasis	0.0319296	0
GO:0004674 protein serine/threonine kinase activity	0.0322097	0
GO:0009141 nucleoside triphosphate metabolic process	0.0332174	0
GO:0030036 actin cytoskeleton organization	0.0333783	0
GO:0044815 DNA packaging complex	0.0334646	0
GO:0016458 gene silencing	0.0340833	0
GO:0000981 RNA polymerase II transcription factor activity, sequence-specific DNA binding	0.0340833	0
GO:0044087 regulation of cellular component biogenesis	0.0354302	0
GO:0031399 regulation of protein modification process	0.0357212	0
GO:0044724 single-organism carbohydrate catabolic process	0.0363763	0
GO:0019752 carboxylic acid metabolic process	0.0368886	0
GO:0034654 nucleobase-containing compound biosynthetic process	0.0391402	0
GO:0007093 mitotic cell cycle checkpoint	0.039503	0
GO:0051650 establishment of vesicle localization	0.0395277	0
GO:0046822 regulation of nucleocytoplasmic transport	0.0395277	0
GO:0046961 proton-transporting ATPase activity, rotational mechanism	0.0395277	0
GO:0003774 motor activity	0.0395277	0
GO:0071902 positive regulation of protein serine/threonine kinase activity	0.0395277	0
GO:0034397 telomere localization	0.0395277	0
GO:0017148 negative regulation of translation	0.0403457	0
GO:0031301 integral component of organelle membrane	0.0412889	0
GO:1904680 peptide transmembrane transporter activity	0.0416343	0
GO:0006928 movement of cell or subcellular component	0.0416343	0
GO:0000972 transcription-dependent tethering of RNA polymerase II gene DNA at nuclear periphery	0.0416343	0
GO:0004722 protein serine/threonine phosphatase activity	0.0416343	0
GO:0015918 sterol transport	0.0416343	0
GO:0000436 carbon catabolite activation of transcription from RNA polymerase II promoter	0.0416343	0
GO:0031300 intrinsic component of organelle membrane	0.042713	0
GO:0007076 mitotic chromosome condensation	0.0428981	0
GO:0008278 cohesin complex	0.0428981	0
GO:0043555 regulation of translation in response to stress	0.0428981	0
GO:0032954 regulation of cytokinetic process	0.0428981	0
GO:0000798 nuclear cohesin complex	0.0428981	0
GO:0008536 Ran GTPase binding	0.0428981	0
GO:0051292 nuclear pore complex assembly	0.0428981	0
GO:1903436 regulation of mitotic cytokinetic process	0.0428981	0
GO:1902626 assembly of large subunit precursor of preribosome	0.0428981	0
GO:0051196 regulation of coenzyme metabolic process	0.0428981	0
GO:2000279 negative regulation of DNA biosynthetic process	0.0428981	0
GO:0006268 DNA unwinding involved in DNA replication	0.0428981	0
GO:1902412 regulation of mitotic cytokinesis	0.0428981	0
GO:0046931 pore complex assembly	0.0428981	0
GO:0097435 supramolecular fiber organization	0.0431468	0
GO:0006887 exocytosis	0.0431499	0
GO:0016050 vesicle organization	0.043957	0
GO:0051338 regulation of transferase activity	0.0459564	0
GO:0043229 intracellular organelle	0.0459814	0
GO:0043226 organelle	0.0459814	0
GO:0030864 cortical actin cytoskeleton	0.0473222	0
GO:0032970 regulation of actin filament-based process	0.047844	0
GO:0015405 P-P-bond-hydrolysis-driven transmembrane transporter activity	0.047844	0
GO:0015399 primary active transmembrane transporter activity	0.047844	0
GO:0032956 regulation of actin cytoskeleton organization	0.047844	0
GO:0030641 regulation of cellular pH	0.0479891	0
GO:0051453 regulation of intracellular pH	0.0479891	0
GO:0006892 post-Golgi vesicle-mediated transport	0.0480362	0
GO:0045814 negative regulation of gene expression, epigenetic	0.0481522	0
GO:0006342 chromatin silencing	0.0481522	0
GO:0006914 autophagy	0.0481522	0
GO:0000280 nuclear division	0.0483446	0
GO:0010646 regulation of cell communication	0.049377	0
GO:0051726 regulation of cell cycle	0.0495725	0
GO:0044723 single-organism carbohydrate metabolic process	0.0497609	0
GO:0033047 regulation of mitotic sister chromatid segregation	0.0507593	0
GO:0032465 regulation of cytokinesis	0.050897	0
GO:0005516 calmodulin binding	0.050897	0
GO:0006614 SRP-dependent cotranslational protein targeting to membrane	0.050897	0
GO:0044450 microtubule organizing center part	0.050897	0
GO:0051648 vesicle localization	0.050897	0
GO:0006613 cotranslational protein targeting to membrane	0.050897	0
GO:0008360 regulation of cell shape	0.050897	0
GO:0005847 mRNA cleavage and polyadenylation specificity factor complex	0.050897	0
GO:0045931 positive regulation of mitotic cell cycle	0.0509052	0
GO:0008298 intracellular mRNA localization	0.0509052	0
GO:0051983 regulation of chromosome segregation	0.0520243	0
GO:1902578 single-organism localization	0.0525735	0
GO:0006893 Golgi to plasma membrane transport	0.0564679	0
GO:0098876 vesicle-mediated transport to the plasma membrane	0.0564679	0
GO:0045047 protein targeting to ER	0.0564679	0
GO:0031975 envelope	0.0568718	0
GO:0031967 organelle envelope	0.0568718	0
GO:0017048 Rho GTPase binding	0.0570088	0
GO:0071421 manganese ion transmembrane transport	0.0570088	0
GO:0005822 inner plaque of spindle pole body	0.0570088	0
GO:0090344 negative regulation of cell aging	0.0570088	0
GO:0060303 regulation of nucleosome density	0.0570088	0
GO:0016242 negative regulation of macroautophagy	0.0570088	0
GO:0016459 myosin complex	0.0570088	0
GO:0070911 global genome nucleotide-excision repair	0.0570088	0
GO:0031344 regulation of cell projection organization	0.0570088	0
GO:0001927 exocyst assembly	0.0570088	0
GO:0043505 CENP-A containing nucleosome	0.0570088	0
GO:0070413 trehalose metabolism in response to stress	0.0570088	0
GO:0000799 nuclear condensin complex	0.0570088	0
GO:0031532 actin cytoskeleton reorganization	0.0570088	0
GO:0010453 regulation of cell fate commitment	0.0570088	0
GO:0032211 negative regulation of telomere maintenance via telomerase	0.0570088	0
GO:0031494 regulation of mating type switching	0.0570088	0
GO:0051222 positive regulation of protein transport	0.0570088	0
GO:0000390 spliceosomal complex disassembly	0.0570088	0
GO:1904357 negative regulation of telomere maintenance via telomere lengthening	0.0570088	0
GO:1901654 response to ketone	0.0570088	0
GO:0031492 nucleosomal DNA binding	0.0570088	0
GO:0080130 L-phenylalanine:2-oxoglutarate aminotransferase activity	0.0570088	0
GO:0000796 condensin complex	0.0570088	0
GO:0005089 Rho guanyl-nucleotide exchange factor activity	0.0570088	0
GO:0005871 kinesin complex	0.0570088	0
GO:0042990 regulation of transcription factor import into nucleus	0.0570088	0
GO:0034644 cellular response to UV	0.0570088	0
GO:0003916 DNA topoisomerase activity	0.0570088	0
GO:0060491 regulation of cell projection assembly	0.0570088	0
GO:0061638 CENP-A containing chromatin	0.0570088	0
GO:1904951 positive regulation of establishment of protein localization	0.0570088	0
GO:0005384 manganese ion transmembrane transporter activity	0.0570088	0
GO:0051880 G-quadruplex DNA binding	0.0570088	0
GO:0070546 L-phenylalanine aminotransferase activity	0.0570088	0
GO:0034506 chromosome, centromeric core domain	0.0570088	0
GO:0000975 regulatory region DNA binding	0.0575485	0
GO:0044212 transcription regulatory region DNA binding	0.0575485	0
GO:0004672 protein kinase activity	0.0580878	0
GO:0060627 regulation of vesicle-mediated transport	0.0587254	0
GO:0001067 regulatory region nucleic acid binding	0.0593524	0
%AA_T	0.0594434	0
GO:0045903 positive regulation of translational fidelity	0.0594617	0
GO:0042981 regulation of apoptotic process	0.0594617	0
GO:0006276 plasmid maintenance	0.0594617	0
GO:0070941 eisosome assembly	0.0594617	0
GO:0043067 regulation of programmed cell death	0.0594617	0
GO:0043242 negative regulation of protein complex disassembly	0.0594617	0
GO:0010941 regulation of cell death	0.0594617	0
GO:0031578 mitotic spindle orientation checkpoint	0.0594617	0
GO:0031297 replication fork processing	0.0594617	0
GO:0044462 external encapsulating structure part	0.0594617	0
GO:0071322 cellular response to carbohydrate stimulus	0.0594617	0
GO:0005546 phosphatidylinositol-4,5-bisphosphate binding	0.0594617	0
GO:0032365 intracellular lipid transport	0.0594617	0
GO:0090342 regulation of cell aging	0.0594617	0
GO:0051193 regulation of cofactor metabolic process	0.0594617	0
GO:0044426 cell wall part	0.0594617	0
GO:0007231 osmosensory signaling pathway	0.0594617	0
GO:0001228 transcriptional activator activity, RNA polymerase II transcription regulatory region sequence-specific binding	0.0600238	0
GO:0044802 single-organism membrane organization	0.0604642	0
GO:0007035 vacuolar acidification	0.0612871	0
GO:0051452 intracellular pH reduction	0.0612871	0
GO:0042887 amide transmembrane transporter activity	0.0612871	0
GO:0045851 pH reduction	0.0612871	0
GO:0015629 actin cytoskeleton	0.0624304	0
GO:0006406 mRNA export from nucleus	0.0624304	0
GO:0071427 mRNA-containing ribonucleoprotein complex export from nucleus	0.0624304	0
GO:0008289 lipid binding	0.063387	0
GO:0009966 regulation of signal transduction	0.063387	0
GO:0033045 regulation of sister chromatid segregation	0.0637676	0
GO:0006458 'de novo' protein folding	0.063859	0
GO:0000741 karyogamy	0.063859	0
GO:0051302 regulation of cell division	0.063859	0
GO:0005088 Ras guanyl-nucleotide exchange factor activity	0.063859	0
GO:0035091 phosphatidylinositol binding	0.0654135	0
GO:0001932 regulation of protein phosphorylation	0.065414	0
GO:0034249 negative regulation of cellular amide metabolic process	0.0657908	0
GO:0031497 chromatin assembly	0.0657908	0
GO:0006885 regulation of pH	0.0657908	0
GO:0072599 establishment of protein localization to endoplasmic reticulum	0.0657908	0
GO:0044786 cell cycle DNA replication	0.0657908	0
GO:0051186 cofactor metabolic process	0.0675792	0
GO:0009126 purine nucleoside monophosphate metabolic process	0.0678188	0
GO:0009167 purine ribonucleoside monophosphate metabolic process	0.0678188	0
%AA_P	0.0682109	0
GO:0061024 membrane organization	0.0685671	0
GO:0045787 positive regulation of cell cycle	0.0695089	0
GO:1901988 negative regulation of cell cycle phase transition	0.0695089	0
GO:1901991 negative regulation of mitotic cell cycle phase transition	0.0695089	0
GO:0008652 cellular amino acid biosynthetic process	0.0697886	0
GC	0.070708	0
GO:0051716 cellular response to stimulus	0.0710283	0
GO:0045859 regulation of protein kinase activity	0.0716711	0
GO:0055067 monovalent inorganic cation homeostasis	0.0725163	0
GO:0017016 Ras GTPase binding	0.0725163	0
GO:1902532 negative regulation of intracellular signal transduction	0.072776	0
GO:0032156 septin cytoskeleton	0.072776	0
GO:0009303 rRNA transcription	0.072776	0
GO:0000018 regulation of DNA recombination	0.072776	0
GO:0017056 structural constituent of nuclear pore	0.072776	0
GO:0045930 negative regulation of mitotic cell cycle	0.073088	0
GO:0006261 DNA-dependent DNA replication	0.0737535	0
GO:0070011 peptidase activity, acting on L-amino acid peptides	0.0758899	0
GO:0015197 peptide transporter activity	0.0759422	0
GO:0048308 organelle inheritance	0.0759422	0
GO:0072665 protein localization to vacuole	0.0759633	0
GO:0008233 peptidase activity	0.0764372	0
GO:0031267 small GTPase binding	0.0765298	0
GO:0016820 hydrolase activity, acting on acid anhydrides, catalyzing transmembrane movement of substances	0.0765298	0
GO:0042626 ATPase activity, coupled to transmembrane movement of substances	0.0765298	0
GO:0098687 chromosomal region	0.0775842	0
GO:1902904 negative regulation of supramolecular fiber organization	0.0783723	0
GO:0010833 telomere maintenance via telomere lengthening	0.0783723	0
GO:0051494 negative regulation of cytoskeleton organization	0.0783723	0
GO:0015616 DNA translocase activity	0.0783723	0
GO:0022884 macromolecule transmembrane transporter activity	0.0783723	0
GO:0008320 protein transmembrane transporter activity	0.0783723	0
GO:0032210 regulation of telomere maintenance via telomerase	0.0785358	0
GO:0032231 regulation of actin filament bundle assembly	0.0785358	0
GO:0070786 positive regulation of growth of unicellular organism as a thread of attached cells	0.0785358	0
GO:0009743 response to carbohydrate	0.0785358	0
GO:0032368 regulation of lipid transport	0.0785358	0
GO:1902410 mitotic cytokinetic process	0.0785358	0
GO:0033157 regulation of intracellular protein transport	0.0785358	0
GO:0090529 cell septum assembly	0.0785358	0
GO:0031386 protein tag	0.0785358	0
GO:0051261 protein depolymerization	0.0785358	0
GO:0000917 barrier septum assembly	0.0785358	0
GO:1904356 regulation of telomere maintenance via telomere lengthening	0.0785358	0
GO:0005769 early endosome	0.0785358	0
GO:0043549 regulation of kinase activity	0.0792307	0
GO:0007005 mitochondrion organization	0.0801179	0
GO:0000976 transcription regulatory region sequence-specific DNA binding	0.0802255	0
GO:0009150 purine ribonucleotide metabolic process	0.0802255	0
GO:0055072 iron ion homeostasis	0.0819203	0
GO:0005684 U2-type spliceosomal complex	0.0819657	0
GO:0030532 small nuclear ribonucleoprotein complex	0.0828229	0
GO:0016042 lipid catabolic process	0.0828229	0
GO:0016052 carbohydrate catabolic process	0.0830017	0
%Proteinturn	0.0837114	0
GO:0006400 tRNA modification	0.0841377	0
GO:0008757 S-adenosylmethionine-dependent methyltransferase activity	0.0841377	0
GO:0000151 ubiquitin ligase complex	0.0841377	0
GO:0005758 mitochondrial intermembrane space	0.0844762	0
GO:0009060 aerobic respiration	0.0845489	0
GO:0098800 inner mitochondrial membrane protein complex	0.0845489	0
GO:0044455 mitochondrial membrane part	0.085897	0
GO:0050896 response to stimulus	0.0866008	0
GO:0006348 chromatin silencing at telomere	0.0869099	0
GO:0006897 endocytosis	0.0869704	0
GO:0016810 hydrolase activity, acting on carbon-nitrogen (but not peptide) bonds	0.0872196	0
GO:0044798 nuclear transcription factor complex	0.0872196	0
GO:0043414 macromolecule methylation	0.0872196	0
GO:0070085 glycosylation	0.0872196	0
GO:0009100 glycoprotein metabolic process	0.0872196	0
GO:0034250 positive regulation of cellular amide metabolic process	0.087489	0
GO:0090068 positive regulation of cell cycle process	0.087489	0
GO:0016074 snoRNA metabolic process	0.087489	0
GO:0044843 cell cycle G1/S phase transition	0.087489	0
GO:0000082 G1/S transition of mitotic cell cycle	0.087489	0
GO:0045727 positive regulation of translation	0.087489	0
GO:0006163 purine nucleotide metabolic process	0.0874906	0
GO:0009411 response to UV	0.0885236	0
GO:0051037 regulation of transcription involved in meiotic cell cycle	0.0885236	0
GO:0019405 alditol catabolic process	0.0885236	0
GO:0010922 positive regulation of phosphatase activity	0.0885236	0
GO:1900153 positive regulation of nuclear-transcribed mRNA catabolic process, deadenylation-dependent decay	0.0885236	0
GO:0060548 negative regulation of cell death	0.0885236	0
GO:0019655 glycolytic fermentation to ethanol	0.0885236	0
GO:0034511 U3 snoRNA binding	0.0885236	0
GO:0019660 glycolytic fermentation	0.0885236	0
GO:0070058 tRNA gene clustering	0.0885236	0
GO:0000411 positive regulation of transcription by galactose	0.0885236	0
GO:0006110 regulation of glycolytic process	0.0885236	0
GO:0090294 nitrogen catabolite activation of transcription	0.0885236	0
GO:0043954 cellular component maintenance	0.0885236	0
GO:1903438 positive regulation of mitotic cytokinetic process	0.0885236	0
GO:0000409 regulation of transcription by galactose	0.0885236	0
GO:0042306 regulation of protein import into nucleus	0.0885236	0
GO:0019563 glycerol catabolic process	0.0885236	0
GO:0051095 regulation of helicase activity	0.0885236	0
GO:0043066 negative regulation of apoptotic process	0.0885236	0
GO:0043406 positive regulation of MAP kinase activity	0.0885236	0
GO:0008079 translation termination factor activity	0.0885236	0
GO:0031554 regulation of DNA-templated transcription, termination	0.0885236	0
GO:0030689 Noc complex	0.0885236	0
GO:1904589 regulation of protein import	0.0885236	0
GO:0043069 negative regulation of programmed cell death	0.0885236	0
GO:0044247 cellular polysaccharide catabolic process	0.0885236	0
GO:0070300 phosphatidic acid binding	0.0885236	0
GO:1903533 regulation of protein targeting	0.0885236	0
GO:0001676 long-chain fatty acid metabolic process	0.0885236	0
GO:0006797 polyphosphate metabolic process	0.0885236	0
GO:0051974 negative regulation of telomerase activity	0.0885236	0
GO:0003747 translation release factor activity	0.0885236	0
GO:1903490 positive regulation of mitotic cytokinesis	0.0885236	0
GO:0061014 positive regulation of mRNA catabolic process	0.0885236	0
GO:0016709 oxidoreductase activity, acting on paired donors, with incorporation or reduction of molecular oxygen, NAD(P)H as one donor, and incorporation of one atom of oxygen	0.0885236	0
GO:1990939 ATP-dependent microtubule motor activity	0.0885236	0
GO:0035786 protein complex oligomerization	0.0885236	0
GO:0001080 nitrogen catabolite activation of transcription from RNA polymerase II promoter	0.0885236	0
GO:0016281 eukaryotic translation initiation factor 4F complex	0.0885236	0
GO:0005823 central plaque of spindle pole body	0.0885236	0
GO:0000019 regulation of mitotic recombination	0.0885236	0
GO:0071822 protein complex subunit organization	0.0893481	0
GO:0000987 core promoter proximal region sequence-specific DNA binding	0.0894605	0
GO:0001159 core promoter proximal region DNA binding	0.0894605	0
GO:0051784 negative regulation of nuclear division	0.0901084	0
%AA_H	0.091854	0
GO:1901607 alpha-amino acid biosynthetic process	0.0925795	0
GO:0051052 regulation of DNA metabolic process	0.0926374	0
GO:0036388 pre-replicative complex assembly	0.0943724	0
GO:0006267 pre-replicative complex assembly involved in nuclear cell cycle DNA replication	0.0943724	0
GO:0051647 nucleus localization	0.0943724	0
GO:0040023 establishment of nucleus localization	0.0943724	0
GO:1902299 pre-replicative complex assembly involved in cell cycle DNA replication	0.0943724	0
GO:0009295 nucleoid	0.0943724	0
GO:0005881 cytoplasmic microtubule	0.0943724	0
GO:0007097 nuclear migration	0.0943724	0
GO:0043492 ATPase activity, coupled to movement of substances	0.0943839	0
GO:0006812 cation transport	0.0974097	0
GO:0016053 organic acid biosynthetic process	0.0980623	0
GO:0046394 carboxylic acid biosynthetic process	0.0980623	0
GO:0030010 establishment of cell polarity	0.0987364	0
GO:0045143 homologous chromosome segregation	0.0989956	0
GO:0017038 protein import	0.0990613	0
GO:0006616 SRP-dependent cotranslational protein targeting to membrane, translocation	0.0998901	0
GO:0031929 TOR signaling	0.0998901	0
GO:0000147 actin cortical patch assembly	0.0998901	0
GO:0045910 negative regulation of DNA recombination	0.0998901	0
GO:0000788 nuclear nucleosome	0.0998901	0
GO:0000742 karyogamy involved in conjugation with cellular fusion	0.0998901	0
GO:0046164 alcohol catabolic process	0.0998901	0
GO:1900542 regulation of purine nucleotide metabolic process	0.0998901	0
GO:0000794 condensed nuclear chromosome	0.100137	0
GO:0048285 organelle fission	0.10166	0
GO:0006109 regulation of carbohydrate metabolic process	0.102186	0
GO:0051020 GTPase binding	0.102186	0
GO:0006623 protein targeting to vacuole	0.102187	0
GO:0072666 establishment of protein localization to vacuole	0.102187	0
GO:0055065 metal ion homeostasis	0.102187	0
GO:0034728 nucleosome organization	0.104132	0
GO:0009914 hormone transport	0.104841	0
GO:0007072 positive regulation of transcription involved in exit from mitosis	0.104841	0
GO:0010796 regulation of multivesicular body size	0.104841	0
GO:0016576 histone dephosphorylation	0.104841	0
GO:0001073 transcription antitermination factor activity, DNA binding	0.104841	0
GO:1903270 regulation of cytoplasmic translational elongation through polyproline stretches	0.104841	0
GO:0016296 palmitoyl-[acyl-carrier-protein] hydrolase activity	0.104841	0
GO:0004332 fructose-bisphosphate aldolase activity	0.104841	0
GO:0090173 regulation of synaptonemal complex assembly	0.104841	0
GO:0016849 phosphorus-oxygen lyase activity	0.104841	0
GO:0072690 single-celled organism vegetative growth phase	0.104841	0
GO:0005821 intermediate layer of spindle pole body	0.104841	0
GO:1902373 negative regulation of mRNA catabolic process	0.104841	0
GO:0001224 RNA polymerase II transcription cofactor binding	0.104841	0
GO:0089716 Pip2-Oaf1 complex	0.104841	0
GO:0046320 regulation of fatty acid oxidation	0.104841	0
GO:0000495 box H/ACA snoRNA 3'-end processing	0.104841	0
GO:0009190 cyclic nucleotide biosynthetic process	0.104841	0
GO:2000284 positive regulation of cellular amino acid biosynthetic process	0.104841	0
GO:0000189 MAPK import into nucleus	0.104841	0
GO:0051896 regulation of protein kinase B signaling	0.104841	0
GO:0006429 leucyl-tRNA aminoacylation	0.104841	0
GO:0044025 histone kinase activity (H2B-S14 specific)	0.104841	0
GO:0000936 primary cell septum	0.104841	0
GO:0090306 spindle assembly involved in meiosis	0.104841	0
GO:1902449 regulation of ATP-dependent DNA helicase activity	0.104841	0
GO:0045848 positive regulation of nitrogen utilization	0.104841	0
GO:0032409 regulation of transporter activity	0.104841	0
GO:0000208 MAPK import into nucleus involved in osmosensory signaling pathway	0.104841	0
GO:1900247 regulation of cytoplasmic translational elongation	0.104841	0
GO:0004690 cyclic nucleotide-dependent protein kinase activity	0.104841	0
GO:0051256 mitotic spindle midzone assembly	0.104841	0
GO:0031937 positive regulation of chromatin silencing	0.104841	0
GO:0005633 ascus lipid particle	0.104841	0
GO:0004318 enoyl-[acyl-carrier-protein] reductase (NADH) activity	0.104841	0
GO:0010044 response to aluminum ion	0.104841	0
GO:0032055 negative regulation of translation in response to stress	0.104841	0
GO:0043048 dolichyl monophosphate biosynthetic process	0.104841	0
GO:0005950 anthranilate synthase complex	0.104841	0
GO:2000238 regulation of tRNA export from nucleus	0.104841	0
GO:0015140 malate transmembrane transporter activity	0.104841	0
GO:0019170 methylglyoxal reductase (NADH-dependent) activity	0.104841	0
GO:1900462 negative regulation of pseudohyphal growth by negative regulation of transcription from RNA polymerase II promoter	0.104841	0
GO:0010998 regulation of translational initiation by eIF2 alpha phosphorylation	0.104841	0
GO:0070615 nucleosome-dependent ATPase activity	0.104841	0
GO:0019747 regulation of isoprenoid metabolic process	0.104841	0
GO:0033857 diphosphoinositol-pentakisphosphate kinase activity	0.104841	0
GO:0045921 positive regulation of exocytosis	0.104841	0
GO:0001321 age-dependent general metabolic decline involved in replicative cell aging	0.104841	0
GO:0010286 heat acclimation	0.104841	0
GO:0046166 glyceraldehyde-3-phosphate biosynthetic process	0.104841	0
GO:0004069 L-aspartate:2-oxoglutarate aminotransferase activity	0.104841	0
GO:1900152 negative regulation of nuclear-transcribed mRNA catabolic process, deadenylation-dependent decay	0.104841	0
GO:0051036 regulation of endosome size	0.104841	0
GO:0070414 trehalose metabolism in response to heat stress	0.104841	0
GO:0045806 negative regulation of endocytosis	0.104841	0
GO:1903222 quinolinic acid transmembrane transport	0.104841	0
GO:0098505 G-rich strand telomeric DNA binding	0.104841	0
GO:0052723 inositol hexakisphosphate 1-kinase activity	0.104841	0
GO:0016247 channel regulator activity	0.104841	0
GO:0031998 regulation of fatty acid beta-oxidation	0.104841	0
GO:0000254 C-4 methylsterol oxidase activity	0.104841	0
GO:0007190 activation of adenylate cyclase activity	0.104841	0
GO:0001225 RNA polymerase II transcription coactivator binding	0.104841	0
GO:0000494 box C/D snoRNA 3'-end processing	0.104841	0
GO:1904726 regulation of replicative senescence	0.104841	0
GO:0003882 CDP-diacylglycerol-serine O-phosphatidyltransferase activity	0.104841	0
GO:0046604 positive regulation of mitotic centrosome separation	0.104841	0
GO:0004691 cAMP-dependent protein kinase activity	0.104841	0
GO:2000235 regulation of tRNA processing	0.104841	0
GO:0004347 glucose-6-phosphate isomerase activity	0.104841	0
GO:0043528 tRNA (m2G10) methyltransferase complex	0.104841	0
GO:1900249 positive regulation of cytoplasmic translational elongation	0.104841	0
GO:0006392 transcription elongation from mitochondrial promoter	0.104841	0
GO:0033254 vacuolar transporter chaperone complex	0.104841	0
GO:0007232 osmosensory signaling pathway via Sho1 osmosensor	0.104841	0
GO:0015743 malate transport	0.104841	0
GO:0001221 transcription cofactor binding	0.104841	0
GO:1990884 RNA acetylation	0.104841	0
GO:0001195 maintenance of transcriptional fidelity during DNA-templated transcription elongation from RNA polymerase III promoter	0.104841	0
GO:0071894 histone H2B conserved C-terminal lysine ubiquitination	0.104841	0
GO:0097079 selenite:proton symporter activity	0.104841	0
GO:0001223 transcription coactivator binding	0.104841	0
GO:0000829 inositol heptakisphosphate kinase activity	0.104841	0
GO:0004823 leucine-tRNA ligase activity	0.104841	0
GO:0004016 adenylate cyclase activity	0.104841	0
GO:0001222 transcription corepressor binding	0.104841	0
GO:0046321 positive regulation of fatty acid oxidation	0.104841	0
GO:0016297 acyl-[acyl-carrier-protein] hydrolase activity	0.104841	0
GO:0006208 pyrimidine nucleobase catabolic process	0.104841	0
GO:0007074 positive regulation of transcription involved in exit from mitosis, from RNA polymerase II promoter	0.104841	0
GO:0061435 positive regulation of transcription from a mobile element promoter	0.104841	0
GO:0008428 ribonuclease inhibitor activity	0.104841	0
GO:0097047 DNA replication termination region	0.104841	0
GO:0010795 regulation of ubiquinone biosynthetic process	0.104841	0
GO:0006314 intron homing	0.104841	0
GO:1990860 Pho85-Pho80 CDK-cyclin complex	0.104841	0
GO:1902415 regulation of mRNA binding	0.104841	0
GO:2000910 negative regulation of sterol import	0.104841	0
GO:0052652 cyclic purine nucleotide metabolic process	0.104841	0
GO:0000831 inositol hexakisphosphate 6-kinase activity	0.104841	0
GO:0004807 triose-phosphate isomerase activity	0.104841	0
GO:0090037 positive regulation of protein kinase C signaling	0.104841	0
GO:0010794 regulation of dolichol biosynthetic process	0.104841	0
GO:0070389 chaperone cofactor-dependent protein refolding	0.104841	0
GO:0009330 DNA topoisomerase complex (ATP-hydrolyzing)	0.104841	0
GO:0045009 chitosome	0.104841	0
GO:0051392 tRNA N-acetyltransferase activity	0.104841	0
GO:1990259 histone-glutamine methyltransferase activity	0.104841	0
GO:0034756 regulation of iron ion transport	0.104841	0
GO:1902298 cell cycle DNA replication maintenance of fidelity	0.104841	0
GO:1903395 regulation of secondary cell septum biogenesis	0.104841	0
GO:0004484 mRNA guanylyltransferase activity	0.104841	0
GO:0033149 FFAT motif binding	0.104841	0
GO:0005093 Rab GDP-dissociation inhibitor activity	0.104841	0
GO:0000832 inositol hexakisphosphate 5-kinase activity	0.104841	0
GO:1990258 histone glutamine methylation	0.104841	0
GO:2000042 negative regulation of double-strand break repair via homologous recombination	0.104841	0
GO:0051039 positive regulation of transcription involved in meiotic cell cycle	0.104841	0
GO:0009299 mRNA transcription	0.104841	0
GO:0051897 positive regulation of protein kinase B signaling	0.104841	0
GO:0001578 microtubule bundle formation	0.104841	0
GO:0002109 maturation of SSU-rRNA from tricistronic rRNA transcript (SSU-rRNA, LSU-rRNA,5S)	0.104841	0
GO:0019860 uracil metabolic process	0.104841	0
GO:0070198 protein localization to chromosome, telomeric region	0.104841	0
GO:0034512 box C/D snoRNA binding	0.104841	0
GO:2000203 regulation of ribosomal large subunit export from nucleus	0.104841	0
GO:0001226 RNA polymerase II transcription corepressor binding	0.104841	0
GO:0090371 regulation of glycerol transport	0.104841	0
GO:1904728 positive regulation of replicative senescence	0.104841	0
GO:0016295 myristoyl-[acyl-carrier-protein] hydrolase activity	0.104841	0
GO:0000828 inositol hexakisphosphate kinase activity	0.104841	0
GO:0004694 eukaryotic translation initiation factor 2alpha kinase activity	0.104841	0
GO:0006107 oxaloacetate metabolic process	0.104841	0
GO:0031115 negative regulation of microtubule polymerization	0.104841	0
GO:0000770 peptide pheromone export	0.104841	0
GO:0042128 nitrate assimilation	0.104841	0
GO:0004313 [acyl-carrier-protein] S-acetyltransferase activity	0.104841	0
GO:0004573 mannosyl-oligosaccharide glucosidase activity	0.104841	0
GO:0006385 transcription elongation from RNA polymerase III promoter	0.104841	0
GO:0042789 mRNA transcription from RNA polymerase II promoter	0.104841	0
GO:0010566 regulation of ketone biosynthetic process	0.104841	0
GO:1903353 regulation of nucleus organization	0.104841	0
GO:0015196 L-tryptophan transmembrane transporter activity	0.104841	0
GO:1902450 negative regulation of ATP-dependent DNA helicase activity	0.104841	0
GO:0060275 maintenance of stationary phase in response to starvation	0.104841	0
GO:0000378 RNA exon ligation	0.104841	0
GO:0019003 GDP binding	0.104841	0
GO:0004100 chitin synthase activity	0.104841	0
GO:2000198 negative regulation of ribonucleoprotein complex localization	0.104841	0
GO:0019858 cytosine metabolic process	0.104841	0
GO:0046607 positive regulation of centrosome cycle	0.104841	0
GO:0001319 inheritance of oxidatively modified proteins involved in replicative cell aging	0.104841	0
GO:0004618 phosphoglycerate kinase activity	0.104841	0
GO:1990872 negative regulation of sterol import by negative regulation of transcription from RNA polymerase II promoter	0.104841	0
GO:0036009 protein-glutamine N-methyltransferase activity	0.104841	0
GO:0060629 regulation of homologous chromosome segregation	0.104841	0
GO:0001316 age-dependent response to reactive oxygen species involved in replicative cell aging	0.104841	0
GO:0001322 age-dependent response to oxidative stress involved in replicative cell aging	0.104841	0
GO:0008349 MAP kinase kinase kinase kinase activity	0.104841	0
GO:0022893 low-affinity tryptophan transmembrane transporter activity	0.104841	0
GO:0072368 regulation of lipid transport by negative regulation of transcription from RNA polymerase II promoter	0.104841	0
GO:1903272 positive regulation of cytoplasmic translational elongation through polyproline stretches	0.104841	0
GO:1902369 negative regulation of RNA catabolic process	0.104841	0
GO:0032377 regulation of intracellular lipid transport	0.104841	0
GO:0031940 positive regulation of chromatin silencing at telomere	0.104841	0
GO:0005952 cAMP-dependent protein kinase complex	0.104841	0
GO:1990505 mitotic DNA replication maintenance of fidelity	0.104841	0
GO:0070200 establishment of protein localization to telomere	0.104841	0
GO:0052724 inositol hexakisphosphate 3-kinase activity	0.104841	0
GO:0043991 histone H2B-S14 phosphorylation	0.104841	0
GO:0034337 RNA folding	0.104841	0
GO:1990417 snoRNA release from pre-rRNA	0.104841	0
GO:1904812 rRNA acetylation involved in maturation of SSU-rRNA	0.104841	0
GO:0008398 sterol 14-demethylase activity	0.104841	0
GO:0001317 accumulation of oxidatively modified proteins involved in replicative cell aging	0.104841	0
GO:0071139 resolution of recombination intermediates	0.104841	0
GO:0090343 positive regulation of cell aging	0.104841	0
GO:1990426 mitotic recombination-dependent replication fork processing	0.104841	0
GO:0000373 Group II intron splicing	0.104841	0
GO:2001278 positive regulation of leucine biosynthetic process	0.104841	0
GO:0061723 glycophagy	0.104841	0
GO:0051229 meiotic spindle disassembly	0.104841	0
GO:1905214 regulation of RNA binding	0.104841	0
GO:0051047 positive regulation of secretion	0.104841	0
GO:1904594 regulation of termination of RNA polymerase II transcription	0.104841	0
GO:1990883 rRNA cytidine N-acetyltransferase activity	0.104841	0
GO:0048874 homeostasis of number of cells in a free-living population	0.104841	0
GO:0000830 inositol hexakisphosphate 4-kinase activity	0.104841	0
GO:0090618 DNA clamp unloading	0.104841	0
GO:0006659 phosphatidylserine biosynthetic process	0.104841	0
GO:1990593 nascent polypeptide-associated complex binding	0.104841	0
GO:0030702 chromatin silencing at centromere	0.104841	0
GO:1905216 positive regulation of RNA binding	0.104841	0
GO:0032000 positive regulation of fatty acid beta-oxidation	0.104841	0
GO:0000148 1,3-beta-D-glucan synthase complex	0.104841	0
GO:0031627 telomeric loop formation	0.104841	0
GO:0004425 indole-3-glycerol-phosphate synthase activity	0.104841	0
GO:0071423 malate transmembrane transport	0.104841	0
GO:1990882 rRNA acetylation	0.104841	0
GO:0046605 regulation of centrosome cycle	0.104841	0
GO:0010737 protein kinase A signaling	0.104841	0
GO:0034758 positive regulation of iron ion transport	0.104841	0
GO:0018364 peptidyl-glutamine methylation	0.104841	0
GO:0070370 cellular heat acclimation	0.104841	0
GO:0022898 regulation of transmembrane transporter activity	0.104841	0
GO:1902481 gamma-tubulin complex assembly	0.104841	0
GO:0034463 90S preribosome assembly	0.104841	0
GO:0004049 anthranilate synthase activity	0.104841	0
GO:0051391 tRNA acetylation	0.104841	0
GO:2000200 regulation of ribosomal subunit export from nucleus	0.104841	0
GO:0016418 S-acetyltransferase activity	0.104841	0
GO:0035390 establishment of chromatin silencing at telomere	0.104841	0
GO:2001276 regulation of leucine biosynthetic process	0.104841	0
GO:0032372 negative regulation of sterol transport	0.104841	0
GO:0044848 biological phase	0.104841	0
GO:0006212 uracil catabolic process	0.104841	0
GO:1903532 positive regulation of secretion by cell	0.104841	0
GO:0005087 Ran guanyl-nucleotide exchange factor activity	0.104841	0
GO:2000804 regulation of termination of RNA polymerase II transcription, poly(A)-coupled	0.104841	0
GO:0048219 inter-Golgi cisterna vesicle-mediated transport	0.104841	0
GO:2000805 negative regulation of termination of RNA polymerase II transcription, poly(A)-coupled	0.104841	0
GO:0047451 3-hydroxyoctanoyl-[acyl-carrier-protein] dehydratase activity	0.104841	0
GO:0044109 cellular alcohol catabolic process	0.104841	0
GO:0032168 hyphal septin ring	0.104841	0
GO:0008637 apoptotic mitochondrial changes	0.104841	0
GO:0046602 regulation of mitotic centrosome separation	0.104841	0
GO:0050849 negative regulation of calcium-mediated signaling	0.104841	0
GO:0004320 oleoyl-[acyl-carrier-protein] hydrolase activity	0.104841	0
GO:0008097 5S rRNA binding	0.104841	0
GO:0048872 homeostasis of number of cells	0.104841	0
GO:0004168 dolichol kinase activity	0.104841	0
GO:0043035 chromatin insulator sequence binding	0.104841	0
GO:1902416 positive regulation of mRNA binding	0.104841	0
GO:0019266 asparagine biosynthetic process from oxaloacetate	0.104841	0
GO:1902657 protein localization to prospore membrane	0.104841	0
GO:0060274 maintenance of stationary phase	0.104841	0
GO:0043531 ADP binding	0.104841	0
GO:0000903 regulation of cell shape during vegetative growth phase	0.104841	0
GO:0006171 cAMP biosynthetic process	0.104841	0
GO:0010673 positive regulation of transcription from RNA polymerase II promoter involved in meiotic cell cycle	0.104841	0
GO:0000918 barrier septum site selection	0.104841	0
GO:0008192 RNA guanylyltransferase activity	0.104841	0
GO:0015827 tryptophan transport	0.104841	0
GO:0042126 nitrate metabolic process	0.104841	0
GO:0090372 positive regulation of glycerol transport	0.104841	0
GO:0070194 synaptonemal complex disassembly	0.104841	0
GO:0023051 regulation of signaling	0.105653	0
GO:0044711 single-organism biosynthetic process	0.106273	0
GO:0044424 intracellular part	0.107406	0
GO:0005622 intracellular	0.107406	0
GO:0019899 enzyme binding	0.107495	0
GO:0045786 negative regulation of cell cycle	0.10776	0
GO:0031965 nuclear membrane	0.109334	0
GO:0019318 hexose metabolic process	0.110866	0
GO:0008565 protein transporter activity	0.110866	0
GO:0035303 regulation of dephosphorylation	0.111775	0
GO:0006378 mRNA polyadenylation	0.111775	0
GO:0005849 mRNA cleavage factor complex	0.111775	0
GO:0006369 termination of RNA polymerase II transcription	0.111775	0
GO:0070507 regulation of microtubule cytoskeleton organization	0.111775	0
GO:0031306 intrinsic component of mitochondrial outer membrane	0.111775	0
GO:0031126 snoRNA 3'-end processing	0.111775	0
GO:0042162 telomeric DNA binding	0.111775	0
GO:0031307 integral component of mitochondrial outer membrane	0.111775	0
GO:0009206 purine ribonucleoside triphosphate biosynthetic process	0.111775	0
GO:0009145 purine nucleoside triphosphate biosynthetic process	0.111775	0
GO:0005667 transcription factor complex	0.112229	0
GO:0043628 ncRNA 3'-end processing	0.115775	0
GO:0008017 microtubule binding	0.115775	0
GO:0000323 lytic vacuole	0.115972	0
GO:0043436 oxoacid metabolic process	0.116166	0
GO:0006082 organic acid metabolic process	0.116493	0
GO:0000723 telomere maintenance	0.117001	0
GO:0060249 anatomical structure homeostasis	0.117001	0
GO:0000978 RNA polymerase II core promoter proximal region sequence-specific DNA binding	0.117001	0
GO:0009408 response to heat	0.117001	0
GO:0016591 DNA-directed RNA polymerase II, holoenzyme	0.118447	0
GO:0031227 intrinsic component of endoplasmic reticulum membrane	0.118447	0
GO:0030176 integral component of endoplasmic reticulum membrane	0.118447	0
GO:0009101 glycoprotein biosynthetic process	0.118447	0
GO:0016758 transferase activity, transferring hexosyl groups	0.121983	0
GO:0097525 spliceosomal snRNP complex	0.122269	0
GO:0008033 tRNA processing	0.122317	0
GO:0030688 preribosome, small subunit precursor	0.123265	0
GO:0044396 actin cortical patch organization	0.123265	0
GO:0032986 protein-DNA complex disassembly	0.123265	0
GO:0016471 vacuolar proton-transporting V-type ATPase complex	0.123265	0
GO:0034398 telomere tethering at nuclear periphery	0.123265	0
GO:0001046 core promoter sequence-specific DNA binding	0.123265	0
GO:0033176 proton-transporting V-type ATPase complex	0.123265	0
GO:0071431 tRNA-containing ribonucleoprotein complex export from nucleus	0.123265	0
GO:0006409 tRNA export from nucleus	0.123265	0
GO:0032204 regulation of telomere maintenance	0.123265	0
GO:0004702 signal transducer, downstream of receptor, with serine/threonine kinase activity	0.123265	0
GO:0001133 RNA polymerase II transcription factor activity, sequence-specific transcription regulatory region DNA binding	0.123801	0
GO:0090435 protein localization to nuclear envelope	0.123801	0
GO:0033180 proton-transporting V-type ATPase, V1 domain	0.123801	0
GO:0019217 regulation of fatty acid metabolic process	0.123801	0
GO:0010526 negative regulation of transposition, RNA-mediated	0.123801	0
GO:0007089 traversing start control point of mitotic cell cycle	0.123801	0
GO:0032205 negative regulation of telomere maintenance	0.123801	0
GO:0006283 transcription-coupled nucleotide-excision repair	0.123801	0
GO:0030491 heteroduplex formation	0.123801	0
GO:1903578 regulation of ATP metabolic process	0.123801	0
GO:0010529 negative regulation of transposition	0.123801	0
GO:0051972 regulation of telomerase activity	0.123801	0
GO:0072380 TRC complex	0.123801	0
GO:0036228 protein targeting to nuclear inner membrane	0.123801	0
GO:0032780 negative regulation of ATPase activity	0.123801	0
GO:0071561 nucleus-vacuole junction	0.123801	0
GO:1903313 positive regulation of mRNA metabolic process	0.123801	0
GO:0005832 chaperonin-containing T-complex	0.123801	0
GO:0005852 eukaryotic translation initiation factor 3 complex	0.123801	0
GO:0071482 cellular response to light stimulus	0.123801	0
GO:0000221 vacuolar proton-transporting V-type ATPase, V1 domain	0.123801	0
GO:0072379 ER membrane insertion complex	0.123801	0
GO:0017116 single-stranded DNA-dependent ATP-dependent DNA helicase activity	0.123801	0
GO:0001079 nitrogen catabolite regulation of transcription from RNA polymerase II promoter	0.123801	0
GO:2000779 regulation of double-strand break repair	0.123801	0
GO:0031087 deadenylation-independent decapping of nuclear-transcribed mRNA	0.123801	0
GO:0000376 RNA splicing, via transesterification reactions with guanosine as nucleophile	0.123801	0
GO:0016408 C-acyltransferase activity	0.123801	0
GO:0003777 microtubule motor activity	0.123801	0
GO:0000372 Group I intron splicing	0.123801	0
GO:0032451 demethylase activity	0.123801	0
GO:0042555 MCM complex	0.123801	0
GO:0070550 rDNA condensation	0.123801	0
GO:0006260 DNA replication	0.125833	0
%AA_D	0.127511	0
GO:0009259 ribonucleotide metabolic process	0.127931	0
GO:0046496 nicotinamide nucleotide metabolic process	0.128514	0
GO:0019362 pyridine nucleotide metabolic process	0.128514	0
SNP-HIGH	0.128814	0
GO:0045132 meiotic chromosome segregation	0.129666	0
GO:0006612 protein targeting to membrane	0.129666	0
GO:0001012 RNA polymerase II regulatory region DNA binding	0.130149	0
GO:0000154 rRNA modification	0.130479	0
GO:0010243 response to organonitrogen compound	0.130479	0
GO:0042802 identical protein binding	0.130479	0
GO:0032886 regulation of microtubule-based process	0.130479	0
GO:0003697 single-stranded DNA binding	0.134802	0
GO:0010256 endomembrane system organization	0.135071	0
GO:0000322 storage vacuole	0.138237	0
GO:0000324 fungal-type vacuole	0.138237	0
GO:0098798 mitochondrial protein complex	0.139066	0
GO:0099023 tethering complex	0.139925	0
GO:0015850 organic hydroxy compound transport	0.139925	0
GO:0098796 membrane protein complex	0.140087	0
GO:0000724 double-strand break repair via homologous recombination	0.140853	0
GO:0006470 protein dephosphorylation	0.140853	0
GO:0000781 chromosome, telomeric region	0.141147	0
GO:0005773 vacuole	0.142247	0
GO:0000466 maturation of 5.8S rRNA from tricistronic rRNA transcript (SSU-rRNA, 5.8S rRNA, LSU-rRNA)	0.143594	0
%AA_N	0.144073	0
GO:0009277 fungal-type cell wall	0.146968	0
GO:0044283 small molecule biosynthetic process	0.147006	0
GO:0006354 DNA-templated transcription, elongation	0.147781	0
GO:0005736 DNA-directed RNA polymerase I complex	0.148386	0
GO:0006904 vesicle docking involved in exocytosis	0.148386	0
GO:0005057 signal transducer activity, downstream of receptor	0.148386	0
GO:0006140 regulation of nucleotide metabolic process	0.148386	0
GO:0019682 glyceraldehyde-3-phosphate metabolic process	0.148386	0
GO:0031330 negative regulation of cellular catabolic process	0.148386	0
GO:0006098 pentose-phosphate shunt	0.148386	0
GO:0009895 negative regulation of catabolic process	0.148386	0
GO:0007118 budding cell apical bud growth	0.148386	0
GO:0043405 regulation of MAP kinase activity	0.148386	0
GO:0005984 disaccharide metabolic process	0.148386	0
GO:0010970 transport along microtubule	0.148386	0
GO:0006023 aminoglycan biosynthetic process	0.148386	0
GO:1901073 glucosamine-containing compound biosynthetic process	0.148386	0
GO:0001054 RNA polymerase I activity	0.148386	0
GO:0006031 chitin biosynthetic process	0.148386	0
GO:0072384 organelle transport along microtubule	0.148386	0
GO:0042790 transcription of nuclear large rRNA transcript from RNA polymerase I promoter	0.148386	0
GO:0045182 translation regulator activity	0.148386	0
GO:0030473 nuclear migration along microtubule	0.148386	0
GO:0006468 protein phosphorylation	0.149841	0
GO:0000460 maturation of 5.8S rRNA	0.14995	0
GO:0016051 carbohydrate biosynthetic process	0.14995	0
GO:0009894 regulation of catabolic process	0.14995	0
GO:0016236 macroautophagy	0.14995	0
GO:0009201 ribonucleoside triphosphate biosynthetic process	0.150372	0
GO:0045121 membrane raft	0.150372	0
GO:0051054 positive regulation of DNA metabolic process	0.150372	0
GO:0098857 membrane microdomain	0.150372	0
GO:0030515 snoRNA binding	0.150372	0
GO:0015849 organic acid transport	0.150807	0
GO:0003690 double-stranded DNA binding	0.154109	0
GO:0019725 cellular homeostasis	0.154528	0
GO:0044427 chromosomal part	0.15466	0
GO:0043412 macromolecule modification	0.155681	0
GO:0019438 aromatic compound biosynthetic process	0.15702	0
GO:0048037 cofactor binding	0.159914	0
GO:0006873 cellular ion homeostasis	0.160396	0
GO:0001402 signal transduction involved in filamentous growth	0.16171	0
GO:0030126 COPI vesicle coat	0.16171	0
GO:0090293 nitrogen catabolite regulation of transcription	0.16171	0
GO:0009416 response to light stimulus	0.16171	0
GO:0009312 oligosaccharide biosynthetic process	0.16171	0
GO:0034762 regulation of transmembrane transport	0.16171	0
GO:0006646 phosphatidylethanolamine biosynthetic process	0.16171	0
GO:0000712 resolution of meiotic recombination intermediates	0.16171	0
GO:0010962 regulation of glucan biosynthetic process	0.16171	0
GO:0006074 (1->3)-beta-D-glucan metabolic process	0.16171	0
GO:0070072 vacuolar proton-transporting V-type ATPase complex assembly	0.16171	0
GO:2000222 positive regulation of pseudohyphal growth	0.16171	0
GO:0032885 regulation of polysaccharide biosynthetic process	0.16171	0
GO:0070070 proton-transporting V-type ATPase complex assembly	0.16171	0
GO:0004712 protein serine/threonine/tyrosine kinase activity	0.16171	0
GO:0043140 ATP-dependent 3'-5' DNA helicase activity	0.16171	0
GO:1900087 positive regulation of G1/S transition of mitotic cell cycle	0.16171	0
GO:1901880 negative regulation of protein depolymerization	0.16171	0
GO:0006265 DNA topological change	0.16171	0
GO:0003725 double-stranded RNA binding	0.16171	0
GO:0031086 nuclear-transcribed mRNA catabolic process, deadenylation-independent decay	0.16171	0
GO:0006452 translational frameshifting	0.16171	0
GO:0051865 protein autoubiquitination	0.16171	0
GO:0043007 maintenance of rDNA	0.16171	0
GO:1902808 positive regulation of cell cycle G1/S phase transition	0.16171	0
GO:0004497 monooxygenase activity	0.16171	0
GO:0034063 stress granule assembly	0.16171	0
GO:0019904 protein domain specific binding	0.16171	0
GO:0030846 termination of RNA polymerase II transcription, poly(A)-coupled	0.16171	0
GO:0000448 cleavage in ITS2 between 5.8S rRNA and LSU-rRNA of tricistronic rRNA transcript (SSU-rRNA, 5.8S rRNA, LSU-rRNA)	0.16171	0
GO:0006979 response to oxidative stress	0.162885	0
GO:0090575 RNA polymerase II transcription factor complex	0.164146	0
GO:0009161 ribonucleoside monophosphate metabolic process	0.164941	0
GO:0006486 protein glycosylation	0.166859	0
GO:0043413 macromolecule glycosylation	0.166859	0
GO:0000793 condensed chromosome	0.167526	0
GO:0009123 nucleoside monophosphate metabolic process	0.167526	0
GO:0005694 chromosome	0.167678	0
GO:0030001 metal ion transport	0.169633	0
GO:0009636 response to toxic substance	0.17179	0
GO:0042157 lipoprotein metabolic process	0.17179	0
GO:0044439 peroxisomal part	0.17179	0
GO:0044438 microbody part	0.17179	0
GO:1901657 glycosyl compound metabolic process	0.17179	0
GO:0004536 deoxyribonuclease activity	0.171946	0
GO:0006879 cellular iron ion homeostasis	0.171946	0
GO:0000002 mitochondrial genome maintenance	0.171946	0
GO:0032200 telomere organization	0.173314	0
GO:0006865 amino acid transport	0.173491	0
GO:0046785 microtubule polymerization	0.174974	0
GO:0000786 nucleosome	0.174974	0
GO:0043488 regulation of mRNA stability	0.174974	0
GO:2000278 regulation of DNA biosynthetic process	0.174974	0
GO:0043269 regulation of ion transport	0.174974	0
GO:0001100 negative regulation of exit from mitosis	0.174974	0
GO:1900430 positive regulation of filamentous growth of a population of unicellular organisms	0.174974	0
GO:0009314 response to radiation	0.174974	0
GO:1901616 organic hydroxy compound catabolic process	0.174974	0
GO:0004532 exoribonuclease activity	0.174974	0
GO:0090033 positive regulation of filamentous growth	0.174974	0
GO:0016896 exoribonuclease activity, producing 5'-phosphomonoesters	0.174974	0
GO:0032541 cortical endoplasmic reticulum	0.174974	0
GO:0042803 protein homodimerization activity	0.174974	0
GO:0007020 microtubule nucleation	0.174974	0
GO:0019829 cation-transporting ATPase activity	0.175857	0
GO:0004721 phosphoprotein phosphatase activity	0.180522	0
GO:0000977 RNA polymerase II regulatory region sequence-specific DNA binding	0.180844	0
GO:0006875 cellular metal ion homeostasis	0.181414	0
GO:0016746 transferase activity, transferring acyl groups	0.182162	0
GO:0048278 vesicle docking	0.184931	0
GO:0007186 G-protein coupled receptor signaling pathway	0.184931	0
GO:0042625 ATPase coupled ion transmembrane transporter activity	0.184931	0
GO:0022853 active ion transmembrane transporter activity	0.184931	0
GO:0006366 transcription from RNA polymerase II promoter	0.186358	0
GO:0016192 vesicle-mediated transport	0.187332	0
GO:0098588 bounding membrane of organelle	0.188499	0
GO:0070783 growth of unicellular organism as a thread of attached cells	0.189471	0
GO:0044182 filamentous growth of a population of unicellular organisms	0.189471	0
GO:0009266 response to temperature stimulus	0.189471	0
GO:0033260 nuclear DNA replication	0.195612	0
GO:0098589 membrane region	0.195612	0
GO:0006271 DNA strand elongation involved in DNA replication	0.195612	0
GO:0072521 purine-containing compound metabolic process	0.196356	0
GO:0032993 protein-DNA complex	0.196452	0
GO:0050994 regulation of lipid catabolic process	0.198713	0
GO:1900373 positive regulation of purine nucleotide biosynthetic process	0.198713	0
GO:0032958 inositol phosphate biosynthetic process	0.198713	0
GO:0044620 ACP phosphopantetheine attachment site binding	0.198713	0
GO:0008308 voltage-gated anion channel activity	0.198713	0
GO:0017049 GTP-Rho binding	0.198713	0
GO:2000767 positive regulation of cytoplasmic translation	0.198713	0
GO:0034247 snoRNA splicing	0.198713	0
GO:0043458 ethanol biosynthetic process involved in glucose fermentation to ethanol	0.198713	0
GO:0030691 Noc2p-Noc3p complex	0.198713	0
GO:1901984 negative regulation of protein acetylation	0.198713	0
GO:0051096 positive regulation of helicase activity	0.198713	0
GO:0045901 positive regulation of translational elongation	0.198713	0
GO:0030371 translation repressor activity	0.198713	0
GO:0045142 triplex DNA binding	0.198713	0
GO:0051707 response to other organism	0.198713	0
GO:0102132 3-oxo-pimeloyl-[acp] methyl ester reductase activity	0.198713	0
GO:0051418 microtubule nucleation by microtubule organizing center	0.198713	0
GO:0072319 vesicle uncoating	0.198713	0
GO:0051349 positive regulation of lyase activity	0.198713	0
GO:1903342 negative regulation of meiotic DNA double-strand break formation	0.198713	0
GO:0048211 Golgi vesicle docking	0.198713	0
GO:0004316 3-oxoacyl-[acyl-carrier-protein] reductase (NADPH) activity	0.198713	0
GO:0043891 glyceraldehyde-3-phosphate dehydrogenase (NAD(P)+) (phosphorylating) activity	0.198713	0
GO:0061505 DNA topoisomerase II activity	0.198713	0
GO:0031032 actomyosin structure organization	0.198713	0
GO:0008793 aromatic-amino-acid:2-oxoglutarate aminotransferase activity	0.198713	0
GO:0070914 UV-damage excision repair	0.198713	0
GO:0071244 cellular response to carbon dioxide	0.198713	0
GO:0019521 D-gluconate metabolic process	0.198713	0
GO:0045738 negative regulation of DNA repair	0.198713	0
GO:0005854 nascent polypeptide-associated complex	0.198713	0
GO:0035067 negative regulation of histone acetylation	0.198713	0
GO:0004315 3-oxoacyl-[acyl-carrier-protein] synthase activity	0.198713	0
GO:0004525 ribonuclease III activity	0.198713	0
GO:0030819 positive regulation of cAMP biosynthetic process	0.198713	0
GO:0031941 filamentous actin	0.198713	0
GO:0071169 establishment of protein localization to chromatin	0.198713	0
GO:0033217 regulation of transcription from RNA polymerase II promoter in response to iron ion starvation	0.198713	0
GO:0000185 activation of MAPKKK activity	0.198713	0
GO:0032369 negative regulation of lipid transport	0.198713	0
GO:0046831 regulation of RNA export from nucleus	0.198713	0
GO:0030908 protein splicing	0.198713	0
GO:0048025 negative regulation of mRNA splicing, via spliceosome	0.198713	0
GO:0009245 lipid A biosynthetic process	0.198713	0
GO:0052862 glucan endo-1,4-beta-glucanase activity, C-3 substituted reducing group	0.198713	0
GO:0070202 regulation of establishment of protein localization to chromosome	0.198713	0
GO:0004534 5'-3' exoribonuclease activity	0.198713	0
GO:0034964 box H/ACA snoRNA processing	0.198713	0
GO:0052736 beta-glucanase activity	0.198713	0
GO:0000915 actomyosin contractile ring assembly	0.198713	0
GO:0045764 positive regulation of cellular amino acid metabolic process	0.198713	0
GO:2000616 negative regulation of histone H3-K9 acetylation	0.198713	0
GO:0000036 ACP phosphopantetheine attachment site binding involved in fatty acid biosynthetic process	0.198713	0
GO:0005086 ARF guanyl-nucleotide exchange factor activity	0.198713	0
GO:2001124 regulation of translational frameshifting	0.198713	0
GO:0048015 phosphatidylinositol-mediated signaling	0.198713	0
GO:0043539 protein serine/threonine kinase activator activity	0.198713	0
GO:0050996 positive regulation of lipid catabolic process	0.198713	0
GO:0016460 myosin II complex	0.198713	0
GO:0006076 (1->3)-beta-D-glucan catabolic process	0.198713	0
GO:0009615 response to virus	0.198713	0
GO:0051011 microtubule minus-end binding	0.198713	0
GO:0004365 glyceraldehyde-3-phosphate dehydrogenase (NAD+) (phosphorylating) activity	0.198713	0
GO:0016212 kynurenine-oxoglutarate transaminase activity	0.198713	0
GO:0003938 IMP dehydrogenase activity	0.198713	0
GO:0030869 RENT complex	0.198713	0
GO:0004743 pyruvate kinase activity	0.198713	0
GO:0004616 phosphogluconate dehydrogenase (decarboxylating) activity	0.198713	0
GO:0015093 ferrous iron transmembrane transporter activity	0.198713	0
GO:0035173 histone kinase activity	0.198713	0
GO:0032232 negative regulation of actin filament bundle assembly	0.198713	0
GO:0004430 1-phosphatidylinositol 4-kinase activity	0.198713	0
GO:0030804 positive regulation of cyclic nucleotide biosynthetic process	0.198713	0
GO:0004449 isocitrate dehydrogenase (NAD+) activity	0.198713	0
GO:0052861 glucan endo-1,3-beta-glucanase activity, C-3 substituted reducing group	0.198713	0
GO:0071788 endoplasmic reticulum tubular network maintenance	0.198713	0
GO:0035307 positive regulation of protein dephosphorylation	0.198713	0
GO:0034257 nicotinamide riboside transmembrane transporter activity	0.198713	0
GO:1903089 5-amino-1-ribofuranosylimidazole-4-carboxamide transporter activity	0.198713	0
GO:2000621 regulation of DNA replication termination	0.198713	0
GO:0031420 alkali metal ion binding	0.198713	0
GO:0019171 3-hydroxyacyl-[acyl-carrier-protein] dehydratase activity	0.198713	0
GO:0000035 acyl binding	0.198713	0
GO:0044837 actomyosin contractile ring organization	0.198713	0
GO:2000615 regulation of histone H3-K9 acetylation	0.198713	0
GO:0005337 nucleoside transmembrane transporter activity	0.198713	0
GO:0035174 histone serine kinase activity	0.198713	0
GO:0060567 negative regulation of DNA-templated transcription, termination	0.198713	0
GO:0034513 box H/ACA snoRNA binding	0.198713	0
GO:0002252 immune effector process	0.198713	0
GO:0010569 regulation of double-strand break repair via homologous recombination	0.198713	0
GO:0006952 defense response	0.198713	0
GO:0004609 phosphatidylserine decarboxylase activity	0.198713	0
GO:0032436 positive regulation of proteasomal ubiquitin-dependent protein catabolic process	0.198713	0
GO:0036033 mediator complex binding	0.198713	0
GO:0015030 Cajal body	0.198713	0
GO:0010793 regulation of mRNA export from nucleus	0.198713	0
GO:0032296 double-stranded RNA-specific ribonuclease activity	0.198713	0
GO:0046058 cAMP metabolic process	0.198713	0
GO:0000916 actomyosin contractile ring contraction	0.198713	0
GO:0051192 prosthetic group binding	0.198713	0
GO:0035376 sterol import	0.198713	0
GO:0001304 progressive alteration of chromatin involved in replicative cell aging	0.198713	0
GO:0051415 interphase microtubule nucleation by interphase microtubule organizing center	0.198713	0
GO:0003918 DNA topoisomerase type II (ATP-hydrolyzing) activity	0.198713	0
GO:0097080 plasma membrane selenite transport	0.198713	0
GO:0031114 regulation of microtubule depolymerization	0.198713	0
GO:1900460 negative regulation of invasive growth in response to glucose limitation by negative regulation of transcription from RNA polymerase II promoter	0.198713	0
GO:0006883 cellular sodium ion homeostasis	0.198713	0
GO:0031493 nucleosomal histone binding	0.198713	0
GO:0032174 cellular bud neck septin collar	0.198713	0
GO:2000757 negative regulation of peptidyl-lysine acetylation	0.198713	0
GO:0045762 positive regulation of adenylate cyclase activity	0.198713	0
GO:0032301 MutSalpha complex	0.198713	0
GO:0009606 tropism	0.198713	0
GO:0031533 mRNA cap methyltransferase complex	0.198713	0
GO:0016032 viral process	0.198713	0
GO:0072318 clathrin coat disassembly	0.198713	0
GO:0005962 mitochondrial isocitrate dehydrogenase complex (NAD+)	0.198713	0
GO:0050848 regulation of calcium-mediated signaling	0.198713	0
GO:0042994 cytoplasmic sequestering of transcription factor	0.198713	0
GO:0010959 regulation of metal ion transport	0.198713	0
GO:0048259 regulation of receptor-mediated endocytosis	0.198713	0
GO:1901269 lipooligosaccharide metabolic process	0.198713	0
GO:0043577 chemotropism	0.198713	0
GO:0035404 histone-serine phosphorylation	0.198713	0
GO:0005784 Sec61 translocon complex	0.198713	0
GO:0044806 G-quadruplex DNA unwinding	0.198713	0
GO:0005094 Rho GDP-dissociation inhibitor activity	0.198713	0
GO:0051275 beta-glucan catabolic process	0.198713	0
GO:0090158 endoplasmic reticulum membrane organization	0.198713	0
GO:0004319 enoyl-[acyl-carrier-protein] reductase (NADPH, B-specific) activity	0.198713	0
GO:0071932 replication fork reversal	0.198713	0
GO:0003917 DNA topoisomerase type I activity	0.198713	0
GO:0000938 GARP complex	0.198713	0
GO:1903326 regulation of tRNA metabolic process	0.198713	0
GO:0033240 positive regulation of cellular amine metabolic process	0.198713	0
GO:0010106 cellular response to iron ion starvation	0.198713	0
GO:0019520 aldonic acid metabolic process	0.198713	0
GO:0000709 meiotic joint molecule formation	0.198713	0
GO:0090069 regulation of ribosome biogenesis	0.198713	0
GO:0015858 nucleoside transport	0.198713	0
GO:0090038 negative regulation of protein kinase C signaling	0.198713	0
GO:0097078 FAL1-SGD1 complex	0.198713	0
GO:2000232 regulation of rRNA processing	0.198713	0
GO:0045905 positive regulation of translational termination	0.198713	0
GO:0043015 gamma-tubulin binding	0.198713	0
GO:0036137 kynurenine aminotransferase activity	0.198713	0
GO:0001308 negative regulation of chromatin silencing involved in replicative cell aging	0.198713	0
GO:2001057 reactive nitrogen species metabolic process	0.198713	0
GO:0097046 replication fork progression beyond termination site	0.198713	0
GO:0071261 Ssh1 translocon complex	0.198713	0
GO:0009975 cyclase activity	0.198713	0
GO:1990526 Ste12p-Dig1p-Dig2p complex	0.198713	0
GO:2001125 negative regulation of translational frameshifting	0.198713	0
GO:0004115 3',5'-cyclic-AMP phosphodiesterase activity	0.198713	0
GO:0048260 positive regulation of receptor-mediated endocytosis	0.198713	0
GO:0034258 nicotinamide riboside transport	0.198713	0
GO:0045025 mitochondrial degradosome	0.198713	0
GO:0002101 tRNA wobble cytosine modification	0.198713	0
GO:0000464 endonucleolytic cleavage in ITS1 upstream of 5.8S rRNA from tricistronic rRNA transcript (SSU-rRNA, 5.8S rRNA, LSU-rRNA)	0.198713	0
GO:0071441 negative regulation of histone H3-K14 acetylation	0.198713	0
GO:0004708 MAP kinase kinase activity	0.198713	0
GO:0032007 negative regulation of TOR signaling	0.198713	0
GO:1990871 Vma12-Vma22 assembly complex	0.198713	0
GO:0033979 box H/ACA snoRNA metabolic process	0.198713	0
GO:0018444 translation release factor complex	0.198713	0
GO:0070250 mating projection membrane	0.198713	0
GO:0003680 AT DNA binding	0.198713	0
GO:0006115 ethanol biosynthetic process	0.198713	0
GO:0045242 isocitrate dehydrogenase complex (NAD+)	0.198713	0
GO:0098542 defense response to other organism	0.198713	0
GO:0000161 MAPK cascade involved in osmosensory signaling pathway	0.198713	0
GO:0044390 ubiquitin-like protein conjugating enzyme binding	0.198713	0
GO:2000780 negative regulation of double-strand break repair	0.198713	0
GO:0043207 response to external biotic stimulus	0.198713	0
GO:0051027 DNA transport	0.198713	0
GO:1990527 Tec1p-Ste12p-Dig1p complex	0.198713	0
GO:0008859 exoribonuclease II activity	0.198713	0
GO:0002376 immune system process	0.198713	0
GO:0005985 sucrose metabolic process	0.198713	0
GO:0004114 3',5'-cyclic-nucleotide phosphodiesterase activity	0.198713	0
GO:0000923 equatorial microtubule organizing center	0.198713	0
GO:1900050 negative regulation of histone exchange	0.198713	0
GO:0031624 ubiquitin conjugating enzyme binding	0.198713	0
GO:0010674 negative regulation of transcription from RNA polymerase II promoter involved in meiotic cell cycle	0.198713	0
GO:0033119 negative regulation of RNA splicing	0.198713	0
GO:0010817 regulation of hormone levels	0.198713	0
GO:0001128 RNA polymerase II transcription coactivator activity involved in preinitiation complex assembly	0.198713	0
GO:0097043 histone H3-K56 acetylation	0.198713	0
GO:0070568 guanylyltransferase activity	0.198713	0
GO:0031848 protection from non-homologous end joining at telomere	0.198713	0
GO:0051607 defense response to virus	0.198713	0
GO:0046493 lipid A metabolic process	0.198713	0
GO:0071440 regulation of histone H3-K14 acetylation	0.198713	0
GO:0004809 tRNA (guanine-N2-)-methyltransferase activity	0.198713	0
GO:0010037 response to carbon dioxide	0.198713	0
GO:0030690 Noc1p-Noc2p complex	0.198713	0
GO:0032931 histone acetyltransferase activity (H3-K56 specific)	0.198713	0
GO:0000912 assembly of actomyosin apparatus involved in cytokinesis	0.198713	0
GO:0030955 potassium ion binding	0.198713	0
GO:0036086 positive regulation of transcription from RNA polymerase II promoter in response to iron ion starvation	0.198713	0
GO:1901271 lipooligosaccharide biosynthetic process	0.198713	0
GO:0055078 sodium ion homeostasis	0.198713	0
GO:1902542 regulation of protein localization to mitotic spindle pole body	0.198713	0
GO:0007026 negative regulation of microtubule depolymerization	0.198713	0
GO:0036286 eisosome filament	0.198713	0
GO:0016539 intein-mediated protein splicing	0.198713	0
GO:0044403 symbiosis, encompassing mutualism through parasitism	0.198713	0
GO:1902363 regulation of protein localization to spindle pole body	0.198713	0
GO:0033204 ribonuclease P RNA binding	0.198713	0
GO:0030801 positive regulation of cyclic nucleotide metabolic process	0.198713	0
GO:0031251 PAN complex	0.198713	0
GO:0031281 positive regulation of cyclase activity	0.198713	0
GO:0005987 sucrose catabolic process	0.198713	0
GO:0000274 mitochondrial proton-transporting ATP synthase, stator stalk	0.198713	0
GO:0080129 proteasome core complex assembly	0.198713	0
GO:0036213 contractile ring contraction	0.198713	0
GO:1903088 5-amino-1-ribofuranosylimidazole-4-carboxamide transmembrane transport	0.198713	0
GO:0031177 phosphopantetheine binding	0.198713	0
GO:0030816 positive regulation of cAMP metabolic process	0.198713	0
GO:0045723 positive regulation of fatty acid biosynthetic process	0.198713	0
GO:0032173 septin collar	0.198713	0
GO:0045265 proton-transporting ATP synthase, stator stalk	0.198713	0
GO:1990334 Bfa1-Bub2 complex	0.198713	0
GO:0000169 activation of MAPK activity involved in osmosensory signaling pathway	0.198713	0
GO:0043247 telomere maintenance in response to DNA damage	0.198713	0
GO:0070187 shelterin complex	0.198713	0
GO:0034309 primary alcohol biosynthetic process	0.198713	0
GO:0016773 phosphotransferase activity, alcohol group as acceptor	0.200153	0
GO:0000433 negative regulation of transcription from RNA polymerase II promoter by glucose	0.201314	0
GO:0051093 negative regulation of developmental process	0.201314	0
GO:0045014 negative regulation of transcription by glucose	0.201314	0
GO:0009756 carbohydrate mediated signaling	0.201314	0
GO:0046174 polyol catabolic process	0.201314	0
GO:0010182 sugar mediated signaling pathway	0.201314	0
GO:0051058 negative regulation of small GTPase mediated signal transduction	0.201314	0
GO:0004312 fatty acid synthase activity	0.201314	0
GO:0000289 nuclear-transcribed mRNA poly(A) tail shortening	0.201314	0
GO:0009757 hexose mediated signaling	0.201314	0
GO:0030307 positive regulation of cell growth	0.201314	0
GO:0005216 ion channel activity	0.201314	0
GO:0014070 response to organic cyclic compound	0.201314	0
GO:0044615 nuclear pore nuclear basket	0.201314	0
GO:0043142 single-stranded DNA-dependent ATPase activity	0.201314	0
GO:0046580 negative regulation of Ras protein signal transduction	0.201314	0
GO:0071333 cellular response to glucose stimulus	0.201314	0
GO:0061413 regulation of transcription from RNA polymerase II promoter by a nonfermentable carbon source	0.201314	0
GO:0005791 rough endoplasmic reticulum	0.201314	0
GO:1900180 regulation of protein localization to nucleus	0.201314	0
GO:0031110 regulation of microtubule polymerization or depolymerization	0.201314	0
GO:0071326 cellular response to monosaccharide stimulus	0.201314	0
GO:0043410 positive regulation of MAPK cascade	0.201314	0
GO:0010458 exit from mitosis	0.201314	0
GO:0006828 manganese ion transport	0.201314	0
GO:0070988 demethylation	0.201314	0
GO:0071331 cellular response to hexose stimulus	0.201314	0
GO:0061414 positive regulation of transcription from RNA polymerase II promoter by a nonfermentable carbon source	0.201314	0
GO:0010255 glucose mediated signaling pathway	0.201314	0
GO:0032845 negative regulation of homeostatic process	0.201314	0
GO:0045595 regulation of cell differentiation	0.201314	0
GO:0010507 negative regulation of autophagy	0.201314	0
GO:0016861 intramolecular oxidoreductase activity, interconverting aldoses and ketoses	0.201314	0
GO:0070181 small ribosomal subunit rRNA binding	0.201314	0
GO:0032272 negative regulation of protein polymerization	0.201314	0
GO:0030867 rough endoplasmic reticulum membrane	0.201314	0
GO:0032161 cleavage apparatus septin structure	0.202753	0
GO:0044839 cell cycle G2/M phase transition	0.202753	0
GO:0005656 nuclear pre-replicative complex	0.202753	0
GO:0045927 positive regulation of growth	0.202753	0
GO:0030705 cytoskeleton-dependent intracellular transport	0.202753	0
GO:0046349 amino sugar biosynthetic process	0.202753	0
GO:0036387 pre-replicative complex	0.202753	0
GO:0010565 regulation of cellular ketone metabolic process	0.202753	0
GO:0006754 ATP biosynthetic process	0.202753	0
GO:0043487 regulation of RNA stability	0.202753	0
GO:0019900 kinase binding	0.202753	0
GO:0048471 perinuclear region of cytoplasm	0.202753	0
GO:0000086 G2/M transition of mitotic cell cycle	0.202753	0
GO:0000973 posttranscriptional tethering of RNA polymerase II gene DNA at nuclear periphery	0.202753	0
GO:0000399 cellular bud neck septin structure	0.202753	0
GO:0008514 organic anion transmembrane transporter activity	0.203607	0
GO:0009066 aspartate family amino acid metabolic process	0.203607	0
GO:0005777 peroxisome	0.203665	0
GO:0042579 microbody	0.203665	0
GO:1901575 organic substance catabolic process	0.204757	0
GO:0046942 carboxylic acid transport	0.206137	0
%AA_E	0.206456	0
GO:0006353 DNA-templated transcription, termination	0.207763	0
GO:0009451 RNA modification	0.208156	0
GO:0034599 cellular response to oxidative stress	0.208175	0
GO:0019693 ribose phosphate metabolic process	0.213659	0
GO:0005618 cell wall	0.214563	0
GO:0030312 external encapsulating structure	0.214563	0
GO:0005975 carbohydrate metabolic process	0.216515	0
GO:0034399 nuclear periphery	0.218303	0
GO:0016973 poly(A)+ mRNA export from nucleus	0.221249	0
GO:0019216 regulation of lipid metabolic process	0.221249	0
GO:0043144 snoRNA processing	0.221249	0
GO:0022616 DNA strand elongation	0.221249	0
GO:0018193 peptidyl-amino acid modification	0.221899	0
GO:0030447 filamentous growth	0.22673	0
GO:0006352 DNA-templated transcription, initiation	0.228452	0
GO:0004175 endopeptidase activity	0.228452	0
GO:0006629 lipid metabolic process	0.229656	0
GO:0098827 endoplasmic reticulum subcompartment	0.231457	0
GO:0042645 mitochondrial nucleoid	0.231457	0
GO:0016705 oxidoreductase activity, acting on paired donors, with incorporation or reduction of molecular oxygen	0.231457	0
GO:0030660 Golgi-associated vesicle membrane	0.231457	0
GO:1902936 phosphatidylinositol bisphosphate binding	0.231457	0
GO:0071782 endoplasmic reticulum tubular network	0.231457	0
GO:0071824 protein-DNA complex subunit organization	0.233153	0
GO:0023057 negative regulation of signaling	0.235939	0
GO:0009968 negative regulation of signal transduction	0.235939	0
GO:0044464 cell part	0.23857	0
GO:0005623 cell	0.238644	0
GO:0000725 recombinational repair	0.238875	0
GO:0005681 spliceosomal complex	0.240758	0
GO:0044699 single-organism process	0.240962	0
GO:1901879 regulation of protein depolymerization	0.241844	0
GO:0016233 telomere capping	0.241844	0
GO:0009607 response to biotic stimulus	0.241844	0
GO:0009306 protein secretion	0.241844	0
GO:0070273 phosphatidylinositol-4-phosphate binding	0.241844	0
GO:0005991 trehalose metabolic process	0.241844	0
GO:0032889 regulation of vacuole fusion, non-autophagic	0.241844	0
GO:0015991 ATP hydrolysis coupled proton transport	0.241844	0
GO:0045002 double-strand break repair via single-strand annealing	0.241844	0
GO:0090337 regulation of formin-nucleated actin cable assembly	0.241844	0
GO:0002790 peptide secretion	0.241844	0
GO:0034284 response to monosaccharide	0.241844	0
GO:0046695 SLIK (SAGA-like) complex	0.241844	0
GO:0051286 cell tip	0.241844	0
GO:0009746 response to hexose	0.241844	0
GO:0030663 COPI-coated vesicle membrane	0.241844	0
GO:0009749 response to glucose	0.241844	0
GO:0033178 proton-transporting two-sector ATPase complex, catalytic domain	0.241844	0
GO:0015988 energy coupled proton transmembrane transport, against electrochemical gradient	0.241844	0
GO:0009251 glucan catabolic process	0.241844	0
GO:0006116 NADH oxidation	0.241844	0
GO:0071478 cellular response to radiation	0.241844	0
GO:1900402 regulation of carbohydrate metabolic process by regulation of transcription from RNA polymerase II promoter	0.241844	0
GO:0043966 histone H3 acetylation	0.241844	0
GO:0005628 prospore membrane	0.24442	0
GO:0042764 ascospore-type prospore	0.24442	0
GO:0042763 intracellular immature spore	0.24442	0
GO:0008237 metallopeptidase activity	0.247244	0
GO:0043039 tRNA aminoacylation	0.247244	0
GO:0043038 amino acid activation	0.247244	0
GO:0072329 monocarboxylic acid catabolic process	0.247244	0
GO:0015297 antiporter activity	0.247595	0
GO:0006555 methionine metabolic process	0.247595	0
GO:0009116 nucleoside metabolic process	0.247595	0
GO:0000407 pre-autophagosomal structure	0.249664	0
GO:0044255 cellular lipid metabolic process	0.252618	0
GO:0006497 protein lipidation	0.253357	0
GO:0000096 sulfur amino acid metabolic process	0.253357	0
GO:0042158 lipoprotein biosynthetic process	0.253357	0
GO:0051248 negative regulation of protein metabolic process	0.254697	0
GO:0032269 negative regulation of cellular protein metabolic process	0.254697	0
GO:0007569 cell aging	0.25832	0
GO:0042594 response to starvation	0.25858	0
GO:1902903 regulation of supramolecular fiber organization	0.25858	0
GO:1901522 positive regulation of transcription from RNA polymerase II promoter involved in cellular response to chemical stimulus	0.25858	0
GO:0016237 lysosomal microautophagy	0.25858	0
GO:0061645 endocytic patch	0.265234	0
GO:0015631 tubulin binding	0.265234	0
GO:0048585 negative regulation of response to stimulus	0.265234	0
GO:0070972 protein localization to endoplasmic reticulum	0.265234	0
GO:0007568 aging	0.266571	0
GO:0044769 ATPase activity, coupled to transmembrane movement of ions, rotational mechanism	0.268451	0
GO:0050662 coenzyme binding	0.274025	0
GO:0018130 heterocycle biosynthetic process	0.274199	0
GO:0055082 cellular chemical homeostasis	0.276527	0
GO:0015980 energy derivation by oxidation of organic compounds	0.276527	0
GO:0000228 nuclear chromosome	0.276867	0
GO:1901698 response to nitrogen compound	0.280119	0
GO:0005319 lipid transporter activity	0.280119	0
GO:0051258 protein polymerization	0.280119	0
GO:0031298 replication fork protection complex	0.280119	0
GO:0043631 RNA polyadenylation	0.280119	0
GO:0043022 ribosome binding	0.280119	0
GO:0006508 proteolysis	0.280421	0
GO:0007015 actin filament organization	0.282445	0
GO:0004364 glutathione transferase activity	0.282671	0
GO:0047484 regulation of response to osmotic stress	0.282671	0
GO:0090630 activation of GTPase activity	0.282671	0
GO:2000045 regulation of G1/S transition of mitotic cell cycle	0.282671	0
GO:1902806 regulation of cell cycle G1/S phase transition	0.282671	0
GO:0044070 regulation of anion transport	0.282671	0
GO:0016780 phosphotransferase activity, for other substituted phosphate groups	0.282671	0
GO:0010921 regulation of phosphatase activity	0.282671	0
GO:0050661 NADP binding	0.282671	0
GO:0000437 carbon catabolite repression of transcription from RNA polymerase II promoter	0.282671	0
GO:0016417 S-acyltransferase activity	0.282671	0
GO:0000430 regulation of transcription from RNA polymerase II promoter by glucose	0.282671	0
GO:0042149 cellular response to glucose starvation	0.282671	0
GO:0045003 double-strand break repair via synthesis-dependent strand annealing	0.282671	0
GO:0006113 fermentation	0.282671	0
GO:2000217 regulation of invasive growth in response to glucose limitation	0.282671	0
GO:0071241 cellular response to inorganic substance	0.282671	0
GO:0046337 phosphatidylethanolamine metabolic process	0.282671	0
GO:0045013 carbon catabolite repression of transcription	0.282671	0
GO:0006835 dicarboxylic acid transport	0.282671	0
GO:1990879 CST complex	0.282761	0
GO:0008553 hydrogen-exporting ATPase activity, phosphorylative mechanism	0.282761	0
GO:0035371 microtubule plus-end	0.282761	0
GO:0005078 MAP-kinase scaffold activity	0.282761	0
GO:1902773 GTPase activator complex	0.282761	0
GO:0035838 growing cell tip	0.282761	0
GO:0071850 mitotic cell cycle arrest	0.282761	0
GO:0009378 four-way junction helicase activity	0.282761	0
GO:0001094 TFIID-class transcription factor binding	0.282761	0
GO:1990316 ATG1/ULK1 kinase complex	0.282761	0
GO:0052742 phosphatidylinositol kinase activity	0.282761	0
GO:0048027 mRNA 5'-UTR binding	0.282761	0
GO:0031588 nucleotide-activated protein kinase complex	0.282761	0
GO:0005845 mRNA cap binding complex	0.282761	0
GO:0030874 nucleolar chromatin	0.282761	0
GO:0036437 Isw1b complex	0.282761	0
GO:0072344 rescue of stalled ribosome	0.282761	0
GO:0016282 eukaryotic 43S preinitiation complex	0.282761	0
GO:0005946 alpha,alpha-trehalose-phosphate synthase complex (UDP-forming)	0.282761	0
GO:0051285 cell cortex of cell tip	0.282761	0
GO:0070545 PeBoW complex	0.282761	0
GO:0019413 acetate biosynthetic process	0.282761	0
GO:0031932 TORC2 complex	0.282761	0
GO:1990752 microtubule end	0.282761	0
GO:0044697 HICS complex	0.282761	0
GO:0000928 gamma-tubulin small complex, spindle pole body	0.282761	0
GO:0016604 nuclear body	0.282761	0
GO:0005640 nuclear outer membrane	0.282761	0
GO:0008275 gamma-tubulin small complex	0.282761	0
GO:0004724 magnesium-dependent protein serine/threonine phosphatase activity	0.282761	0
GO:0000752 agglutination involved in conjugation with cellular fusion	0.282761	0
GO:0001015 snoRNA transcription from an RNA polymerase II promoter	0.282761	0
GO:0097053 L-kynurenine catabolic process	0.282761	0
GO:0070126 mitochondrial translational termination	0.282761	0
GO:0015450 P-P-bond-hydrolysis-driven protein transmembrane transporter activity	0.282761	0
GO:0008157 protein phosphatase 1 binding	0.282761	0
GO:0000339 RNA cap binding	0.282761	0
GO:0004748 ribonucleoside-diphosphate reductase activity, thioredoxin disulfide as acceptor	0.282761	0
GO:0071398 cellular response to fatty acid	0.282761	0
GO:0003825 alpha,alpha-trehalose-phosphate synthase (UDP-forming) activity	0.282761	0
GO:0051436 negative regulation of ubiquitin-protein ligase activity involved in mitotic cell cycle	0.282761	0
GO:0051864 histone demethylase activity (H3-K36 specific)	0.282761	0
GO:0010942 positive regulation of cell death	0.282761	0
[truncated: 1,596 more rows]

## Sheet: Common Genes-Hypergeometric
Query Cluster	Comparison Cluster	pvalue Under-Rep	pvalue Exact	pvalue Over-Rep	Bonferroni pvalue Under-Rep	Bonferroni pvalue Exact	Bonferroni pvalue Over-Rep	Overlap	Cluster 1 size	Cluster2 size	Total Genes Assessed
cluster_common_genes	Cluster_RPs_APGcategory	1	4.76583e-27	5.30874e-27	1175	5.59985e-24	6.23777e-24	57	431	114	4066
cluster_common_genes	Cluster_rESR_RPs_APGcategory	1	8.61852e-27	9.48431e-27	1175	1.01268e-23	1.11441e-23	53	431	100	4066
cluster_common_genes	Cluster_rESR_APGcategory	1	1.08461e-25	1.43426e-25	1175	1.27442e-22	1.68526e-22	115	431	415	4066
cluster_common_genes	Cluster_translation_GO	1	5.62784e-18	6.72132e-18	1175	6.61271e-15	7.89755e-15	50	431	128	4066
cluster_common_genes	Cluster_ESR_APGcategory	1	9.67744e-17	1.51416e-16	1175	1.1371e-13	1.77914e-13	129	431	621	4066
cluster_common_genes	Cluster_ribosome_GO	1	4.15451e-15	4.80696e-15	1175	4.88155e-12	5.64818e-12	36	431	82	4066
cluster_common_genes	Cluster_ScParalogs_E-10_APGcategory	1	4.80356e-15	8.3049e-15	1175	5.64418e-12	9.75826e-12	168	431	948	4066
cluster_common_genes	Cluster_cytoplasm_GO	1	4.93308e-13	8.02306e-13	1175	5.79637e-10	9.4271e-10	105	431	513	4066
cluster_common_genes	Cluster_structural_constituent_of_ribosome_GO	1	1.19117e-12	1.38339e-12	1175	1.39962e-09	1.62548e-09	30	431	69	4066
cluster_common_genes	Cluster_cytosolic_large_ribosomal_subunit_GO	1	1.33896e-12	1.43089e-12	1175	1.57328e-09	1.6813e-09	20	431	32	4066
cluster_common_genes	Cluster_ribonucleoprotein_complex_GO	1	2.12349e-12	2.5564e-12	1175	2.4951e-09	3.00377e-09	34	431	88	4066
cluster_common_genes	Cluster_intracellular_GO	1	5.93997e-11	7.70584e-11	1175	6.97946e-08	9.05436e-08	39	431	123	4066
cluster_common_genes	Cluster_SGDessentials_APGcategory	1	7.37616e-11	1.3779e-10	1175	8.66699e-08	1.61903e-07	133	431	767	4066
cluster_common_genes	Cluster_nucleotide_binding_GO	1	3.03328e-09	4.4478e-09	1175	3.5641e-06	5.22617e-06	48	431	192	4066
cluster_common_genes	Cluster_Pu_Protein_complex	1	6.22625e-09	1.3554e-08	1175	7.31584e-06	1.59259e-05	178	431	1193	4066
cluster_common_genes	Cluster_translational_elongation_GO	1	1.50346e-08	1.52312e-08	1175	1.76657e-05	1.78967e-05	8	431	8	4066
cluster_common_genes	Cluster_ribosome_biogenesis_GO	1	1.16205e-07	1.67485e-07	1175	0.000136541	0.000196795	36	431	139	4066
cluster_common_genes	Cluster_PAC_APGcategory	1	2.3994e-07	4.21638e-07	1175	0.000281929	0.000495425	62	431	315	4066
cluster_common_genes	Cluster_ATP_binding_GO	1	3.58774e-07	5.26259e-07	1175	0.000421559	0.000618354	35	431	139	4066
cluster_common_genes	Cluster_nucleolus_GO	1	1.07731e-06	1.30623e-06	1175	0.00126584	0.00153482	17	431	45	4066
cluster_common_genes	Cluster_nucleus_GO	0.999998	2.17662e-06	4.61216e-06	1175	0.00255753	0.00541929	88	431	533	4066
cluster_common_genes	Cluster_ribosomal_large_subunit_assembly_and_maintenance_GO	1	8.61706e-06	8.76312e-06	1175	0.010125	0.0102967	6	431	7	4066
cluster_common_genes	Cluster_regulation_of_translation_GO	0.999994	1.02285e-05	1.58921e-05	1174.99	0.0120185	0.0186732	31	431	134	4066
cluster_common_genes	Cluster_helicase_activity_GO	0.999997	2.83258e-05	3.15601e-05	1175	0.0332828	0.0370831	9	431	18	4066
cluster_common_genes	Cluster_RNA_binding_GO	0.99999	2.16489e-05	3.20944e-05	1174.99	0.0254375	0.0377109	25	431	101	4066
cluster_common_genes	Cluster_rRNA_processing_GO	0.999993	2.53758e-05	3.2171e-05	1174.99	0.0298166	0.0378009	15	431	45	4066
cluster_common_genes	Cluster_cytosolic_small_ribosomal_subunit_GO	0.999983	8.14328e-05	9.80791e-05	1174.98	0.0956835	0.115243	11	431	29	4066
cluster_common_genes	Cluster_DNA_binding_GO	0.99996	6.16635e-05	0.000101615	1174.95	0.0724546	0.119398	30	431	140	4066
cluster_common_genes	Cluster_mitotic_anaphase_B_GO	1	0.000124686	0.000127673	1175	0.146506	0.150016	4	431	4	4066
cluster_common_genes	Cluster_ATPase_activity_GO	0.999968	0.000114206	0.000145918	1174.96	0.134192	0.171454	13	431	40	4066
cluster_common_genes	Cluster_mitosis_GO	0.999946	0.000218404	0.000272163	1174.94	0.256625	0.319792	11	431	32	4066
cluster_common_genes	Cluster_cell_cycle_GO	0.999902	0.000186102	0.000284033	1174.88	0.21867	0.333739	21	431	89	4066
cluster_common_genes	Cluster_90S_preribosome_GO	0.999948	0.000274475	0.000326182	1174.94	0.322508	0.383264	9	431	23	4066
cluster_common_genes	Cluster_cell_division_GO	0.999873	0.000300248	0.000426781	1174.85	0.352791	0.501468	16	431	61	4066
cluster_common_genes	Cluster_nucleocytoplasmic_transport_GO	0.999951	0.000382849	0.000431947	1174.94	0.449848	0.507538	7	431	15	4066
cluster_common_genes	Cluster_GenesWithParalogs_E-100_APGcategory	0.999804	0.000341729	0.000537915	1174.77	0.401532	0.63205	21	431	93	4066
cluster_common_genes	Cluster_Ras_protein_signal_transduction_GO	0.999968	0.000526346	0.000558251	1174.96	0.618457	0.655945	5	431	8	4066
cluster_common_genes	Cluster_translation_elongation_factor_activity_GO	0.999987	0.000557895	0.000571263	1174.98	0.655527	0.671234	4	431	5	4066
cluster_common_genes	Cluster_cytokinesis,_complextion_of_separation"_GO	0.999987	0.000557895	0.000571263	1174.98	0.655527	0.671234	4	431	5	4066
cluster_common_genes	Cluster_biopolymer_biosynthetic_process_GO	0.99982	0.000500126	0.000680071	1174.79	0.587648	0.799083	13	431	46	4066
cluster_common_genes	Cluster_actin_filament_organization_GO	0.999847	0.000927496	0.00108046	1174.82	1.08981	1.26954	7	431	17	4066
cluster_common_genes	Cluster_protein_refolding_GO	0.999913	0.00105995	0.00114711	1174.9	1.24544	1.34785	5	431	9	4066
cluster_common_genes	Cluster_ATP-dependent_helicase_activity_GO	0.999913	0.00105995	0.00114711	1174.9	1.24544	1.34785	5	431	9	4066
cluster_common_genes	Cluster_cellular_bud_neck_GO	0.999728	0.000937427	0.00120959	1174.68	1.10148	1.42127	10	431	32	4066
cluster_common_genes	Cluster_eukaryotic_translation_elongation_factor_1_complex_GO	1	0.00118364	0.00121931	1175	1.39078	1.43269	3	431	3	4066
cluster_common_genes	Cluster_mating_projection_base_GO	1	0.00118364	0.00121931	1175	1.39078	1.43269	3	431	3	4066
cluster_common_genes	Cluster_regulation_of_nitrogen_utilization_GO	0.999928	0.0014977	0.0015695	1174.92	1.7598	1.84416	4	431	6	4066
cluster_common_genes	Cluster_mitotic_cell_cycle_GO	0.999928	0.0014977	0.0015695	1174.92	1.7598	1.84416	4	431	6	4066
cluster_common_genes	Cluster_small-subunit_processome_GO	0.99975	0.00135879	0.00160888	1174.71	1.59658	1.89043	7	431	18	4066
cluster_common_genes	Cluster_microtubule_GO	0.999747	0.00170339	0.00195668	1174.7	2.00148	2.2991	6	431	14	4066
cluster_common_genes	Cluster_Spellman_G2-M_peak	0.999115	0.0011296	0.00201479	1173.96	1.32728	2.36738	24	431	123	4066
cluster_common_genes	Cluster_mitotic_cell_cycle_spindle_assembly_checkpoint_GO	0.999802	0.00189731	0.00209577	1174.77	2.22934	2.46253	5	431	10	4066
cluster_common_genes	Cluster_response_to_stress_GO	0.999397	0.00162258	0.00222509	1174.29	1.90653	2.61448	11	431	40	4066
cluster_common_genes	Cluster_sequence-specific_DNA_binding_GO	0.999149	0.00197743	0.00282884	1174	2.32348	3.32389	12	431	47	4066
cluster_common_genes	Cluster_nucleic_acid_binding_GO	0.998909	0.00198092	0.00307228	1173.72	2.32758	3.60993	15	431	66	4066
cluster_common_genes	Cluster_plasma_membrane_GO	0.998909	0.00198092	0.00307228	1173.72	2.32758	3.60993	15	431	66	4066
cluster_common_genes	Cluster_ion_transport_GO	0.999406	0.00265273	0.00324694	1174.3	3.11696	3.81515	7	431	20	4066
cluster_common_genes	Cluster_spindle_pole_body_GO	0.999406	0.00265273	0.00324694	1174.3	3.11696	3.81515	7	431	20	4066
cluster_common_genes	Cluster_calmodulin_binding_GO	0.999771	0.0031271	0.00335639	1174.73	3.67434	3.94376	4	431	7	4066
cluster_common_genes	Cluster_negative_regulation_of_protein_metabolic_process_GO	0.999771	0.0031271	0.00335639	1174.73	3.67434	3.94376	4	431	7	4066
cluster_common_genes	Cluster_glycolysis_GO	0.999771	0.0031271	0.00335639	1174.73	3.67434	3.94376	4	431	7	4066
cluster_common_genes	Cluster_nuclear_transport_GO	0.999602	0.00311307	0.0035108	1174.53	3.65786	4.12519	5	431	11	4066
cluster_common_genes	Cluster_guanyl-nucleotide_echange_factor_activity_GO	0.999602	0.00311307	0.0035108	1174.53	3.65786	4.12519	5	431	11	4066
cluster_common_genes	Cluster_nucleus_organization_GO	0.999602	0.00311307	0.0035108	1174.53	3.65786	4.12519	5	431	11	4066
cluster_common_genes	Cluster_protein_import_into_nucleus,_docking"_GO	0.999875	0.00423583	0.00436351	1174.85	4.9771	5.12712	3	431	4	4066
cluster_common_genes	Cluster_regulation_of_small_GTPase_mediated_signal_transduction_GO	0.999875	0.00423583	0.00436351	1174.85	4.9771	5.12712	3	431	4	4066
cluster_common_genes	Cluster_spindle_microtubule_GO	0.999875	0.00423583	0.00436351	1174.85	4.9771	5.12712	3	431	4	4066
cluster_common_genes	Cluster_hydrogen_ion_transporting_ATP_synthase_activity,_rotational_mechanism"_GO	0.999875	0.00423583	0.00436351	1174.85	4.9771	5.12712	3	431	4	4066
cluster_common_genes	Cluster_membrane_raft_GO	0.999875	0.00423583	0.00436351	1174.85	4.9771	5.12712	3	431	4	4066
cluster_common_genes	Cluster_microtubule-based_movement_GO	0.999875	0.00423583	0.00436351	1174.85	4.9771	5.12712	3	431	4	4066
cluster_common_genes	Cluster_transcription_GO	0.997638	0.00233223	0.00469409	1172.22	2.74037	5.51556	28	431	160	4066
cluster_common_genes	Cluster_regulation_of_transcription_from_RNA_polymerase_II_promoter_GO	0.99879	0.00348951	0.0046991	1173.58	4.10017	5.52144	9	431	32	4066
cluster_common_genes	Cluster_transcription_factor_activity_GO	0.998592	0.00354418	0.00495263	1173.35	4.16441	5.81934	10	431	38	4066
cluster_common_genes	Cluster_cell_wall_organization_GO	0.998467	0.00346375	0.00499717	1173.2	4.06991	5.87167	11	431	44	4066
cluster_common_genes	Cluster_spindle_GO	0.999275	0.00477604	0.00550082	1174.15	5.61185	6.46346	5	431	12	4066
cluster_common_genes	Cluster_mitotic_sister_chromatid_segregation_GO	0.999275	0.00477604	0.00550082	1174.15	5.61185	6.46346	5	431	12	4066
cluster_common_genes	Cluster_maturation_of_SSU-rRNA_from_tricistronic_rRNA_transcript_(SSU-rRNA,_5.8S_rRNA,_LSU-rRNA)"_GO	0.99892	0.00503427	0.00611473	1173.73	5.91527	7.18481	6	431	17	4066
cluster_common_genes	Cluster_DNA-dependent_ATPase_activity_GO	0.999442	0.00559627	0.00615453	1174.34	6.57562	7.23157	4	431	8	4066
cluster_common_genes	Cluster_proton_transport_GO	0.999442	0.00559627	0.00615453	1174.34	6.57562	7.23157	4	431	8	4066
cluster_common_genes	Cluster_regulation_of_transcription,_DNA-dependent"_GO	0.996344	0.00354828	0.0072047	1170.7	4.16923	8.46552	26	431	150	4066
cluster_common_genes	Cluster_negative_regulation_of_transposition,_RNA-mediated"_GO	0.998773	0.00694552	0.00817217	1173.56	8.16099	9.6023	5	431	13	4066
cluster_common_genes	Cluster_structural_constituent_of_cytoskeleton_GO	0.998773	0.00694552	0.00817217	1173.56	8.16099	9.6023	5	431	13	4066
cluster_common_genes	Cluster_telomere_maintenance_GO	0.998391	0.00675877	0.00836765	1173.11	7.94155	9.83199	6	431	18	4066
cluster_common_genes	Cluster_establishment_of_protein_localization_GO	0.997633	0.00760504	0.00997209	1172.22	8.93592	11.7172	7	431	24	4066
cluster_common_genes	Cluster_protein_localization_GO	0.999429	0.0094738	0.0100451	1174.33	11.1317	11.803	3	431	5	4066
cluster_common_genes	Cluster_protein_tag_GO	0.999429	0.0094738	0.0100451	1174.33	11.1317	11.803	3	431	5	4066
cluster_common_genes	Cluster_DNA_strand_elongation_during_DNA_replication_GO	0.999429	0.0094738	0.0100451	1174.33	11.1317	11.803	3	431	5	4066
cluster_common_genes	Cluster_response_to_antibiotic_GO	0.999429	0.0094738	0.0100451	1174.33	11.1317	11.803	3	431	5	4066
cluster_common_genes	Cluster_ribosomal_large_subunit_biogenesis_GO	0.999429	0.0094738	0.0100451	1174.33	11.1317	11.803	3	431	5	4066
cluster_common_genes	Cluster_DNA_helicase_activity_GO	0.999429	0.0094738	0.0100451	1174.33	11.1317	11.803	3	431	5	4066
cluster_common_genes	Cluster_RNA_helicase_activity_GO	0.999429	0.0094738	0.0100451	1174.33	11.1317	11.803	3	431	5	4066
cluster_common_genes	Cluster_polysome_GO	0.998853	0.00901334	0.0101605	1173.65	10.5907	11.9386	4	431	9	4066
cluster_common_genes	Cluster_hydrogen_ion_transmembrane_transporter_activity_GO	0.998853	0.00901334	0.0101605	1173.65	10.5907	11.9386	4	431	9	4066
cluster_common_genes	Cluster_mitochondrion_GO	0.993925	0.00422753	0.0103022	1167.86	4.96735	12.1051	38	431	247	4066
cluster_common_genes	Cluster_chromosome_GO	0.996768	0.00752683	0.0107586	1171.2	8.84403	12.6414	9	431	36	4066
cluster_common_genes	Cluster_nuclear_pore_GO	0.997682	0.00884109	0.0111596	1172.28	10.3883	13.1125	6	431	19	4066
cluster_common_genes	Cluster_cytokinesis_GO	0.998043	0.00966855	0.0116252	1172.7	11.3605	13.6596	5	431	14	4066
cluster_common_genes	Cluster_mRNA_binding_GO	0.998043	0.00966855	0.0116252	1172.7	11.3605	13.6596	5	431	14	4066
cluster_common_genes	Cluster_transcription_activator_activity_GO	0.998043	0.00966855	0.0116252	1172.7	11.3605	13.6596	5	431	14	4066
cluster_common_genes	Cluster_cell_corte_GO	1	0.0112129	0.0116672	1175	13.1752	13.709	2	431	2	4066
cluster_common_genes	Cluster_Rho_guanyl-nucleotide_echange_factor_activity_GO	1	0.0112129	0.0116672	1175	13.1752	13.709	2	431	2	4066
cluster_common_genes	Cluster_mitotic_cell_cycle_spindle_orientation_checkpoint_GO	1	0.0112129	0.0116672	1175	13.1752	13.709	2	431	2	4066
cluster_common_genes	Cluster_small_GTPase_regulator_activity_GO	1	0.0112129	0.0116672	1175	13.1752	13.709	2	431	2	4066
cluster_common_genes	Cluster_regulation_of_Rho_protein_signal_transduction_GO	1	0.0112129	0.0116672	1175	13.1752	13.709	2	431	2	4066
cluster_common_genes	Cluster_protein_transmembrane_transporter_activity_GO	1	0.0112129	0.0116672	1175	13.1752	13.709	2	431	2	4066
cluster_common_genes	Cluster_regulation_of_carbohydrate_metabolic_process_GO	1	0.0112129	0.0116672	1175	13.1752	13.709	2	431	2	4066
cluster_common_genes	Cluster_mRNAprocessing_APGcategory	0.993877	0.00735389	0.0134773	1167.81	8.64082	15.8358	17	431	91	4066
cluster_common_genes	Cluster_hydrolase_activity_GO	0.992437	0.00646752	0.0140303	1166.11	7.59934	16.4856	26	431	158	4066
cluster_common_genes	Cluster_hydrolase_activity,_acting_on_acid_anhydrides"_GO	0.997904	0.0134411	0.0155369	1172.54	15.7933	18.2559	4	431	10	4066
cluster_common_genes	Cluster_pyrophosphatase_activity_GO	0.997904	0.0134411	0.0155369	1172.54	15.7933	18.2559	4	431	10	4066
cluster_common_genes	Cluster_mating_projection_tip_GO	0.995843	0.0115803	0.0157371	1170.12	13.6069	18.4911	7	431	26	4066
cluster_common_genes	Cluster_translation_initiation_factor_activity_GO	0.997027	0.0129781	0.0159513	1171.51	15.2493	18.7428	5	431	15	4066
cluster_common_genes	Cluster_GTPase_activator_activity_GO	0.997027	0.0129781	0.0159513	1171.51	15.2493	18.7428	5	431	15	4066
cluster_common_genes	Cluster_NuclearProteinTargetting_APGcategory	0.993953	0.0121571	0.0182042	1167.89	14.2846	21.3899	9	431	39	4066
cluster_common_genes	Cluster_karyogamy_during_conjugation_with_cellular_fusion_GO	0.998431	0.0169507	0.0185201	1173.16	19.9171	21.7611	3	431	6	4066
cluster_common_genes	Cluster_budding_cell_bud_growth_GO	0.998431	0.0169507	0.0185201	1173.16	19.9171	21.7611	3	431	6	4066
cluster_common_genes	Cluster_gluconeogenesis_GO	0.998431	0.0169507	0.0185201	1173.16	19.9171	21.7611	3	431	6	4066
cluster_common_genes	Cluster_mitotic_spindle_organization_in_nucleus_GO	0.998431	0.0169507	0.0185201	1173.16	19.9171	21.7611	3	431	6	4066
cluster_common_genes	Cluster_glycogen_metabolic_process_GO	0.998431	0.0169507	0.0185201	1173.16	19.9171	21.7611	3	431	6	4066
cluster_common_genes	Cluster_protein_amino_acid_phosphorylation_GO	0.992679	0.0140428	0.0213638	1166.4	16.5003	25.1025	9	431	40	4066
cluster_common_genes	Cluster_phosphoprotein_phosphatase_activity_GO	0.996489	0.0188982	0.022409	1170.87	22.2054	26.3306	4	431	11	4066
cluster_common_genes	Cluster_vacuolar_acidification_GO	0.996489	0.0188982	0.022409	1170.87	22.2054	26.3306	4	431	11	4066
cluster_common_genes	Cluster_protein_serine/threonine_kinase_activity_GO	0.991123	0.0179318	0.0268087	1164.57	21.0699	31.5002	8	431	35	4066
cluster_common_genes	Cluster_energy_reserve_metabolic_process_GO	0.993885	0.0214134	0.0275281	1167.81	25.1607	32.3455	5	431	17	4066
cluster_common_genes	Cluster_cellular_bud_tip_GO	0.993885	0.0214134	0.0275281	1167.81	25.1607	32.3455	5	431	17	4066
cluster_common_genes	Cluster_fungal-type_cell_wall_GO	0.992246	0.021101	0.028855	1165.89	24.7937	33.9046	6	431	23	4066
cluster_common_genes	Cluster_nuclear-transcribed_mRNA_catabolic_process,_deadenylation-dependent_decay"_GO	0.996644	0.0265365	0.0298929	1171.06	31.1804	35.1242	3	431	7	4066
cluster_common_genes	Cluster_small_ribosomal_subunit_GO	0.996644	0.0265365	0.0298929	1171.06	31.1804	35.1242	3	431	7	4066
cluster_common_genes	Cluster_ATP-dependent_RNA_helicase_activity_GO	0.996644	0.0265365	0.0298929	1171.06	31.1804	35.1242	3	431	7	4066
cluster_common_genes	Cluster_ribosomal_small_subunit_assembly_and_maintenance_GO	0.996644	0.0265365	0.0298929	1171.06	31.1804	35.1242	3	431	7	4066
cluster_common_genes	Cluster_ATP_synthesis_coupled_proton_transport_GO	0.996644	0.0265365	0.0298929	1171.06	31.1804	35.1242	3	431	7	4066
cluster_common_genes	Cluster_hydrolase_activity,_acting_on_acid_anhydrides,_catalyzing_transmembrane_movement_of_substances"_GO	0.996644	0.0265365	0.0298929	1171.06	31.1804	35.1242	3	431	7	4066
cluster_common_genes	Cluster_DNA_damage_checkpoint_GO	0.996644	0.0265365	0.0298929	1171.06	31.1804	35.1242	3	431	7	4066
cluster_common_genes	Cluster_translational_initiation_GO	0.994499	0.0253622	0.030863	1168.54	29.8006	36.264	4	431	12	4066
cluster_common_genes	Cluster_tRNA_export_from_nucleus_GO	0.994499	0.0253622	0.030863	1168.54	29.8006	36.264	4	431	12	4066
cluster_common_genes	Cluster_chromatin_assembly_or_disassembly_GO	0.994499	0.0253622	0.030863	1168.54	29.8006	36.264	4	431	12	4066
cluster_common_genes	Cluster_cytoplasmic_mRNA_processing_body_GO	0.994499	0.0253622	0.030863	1168.54	29.8006	36.264	4	431	12	4066
cluster_common_genes	Cluster_microtubule_motor_activity_GO	0.998816	0.0300878	0.0313071	1173.61	35.3532	36.7858	2	431	3	4066
cluster_common_genes	Cluster_sterol_carrier_activity_GO	0.998816	0.0300878	0.0313071	1173.61	35.3532	36.7858	2	431	3	4066
cluster_common_genes	Cluster_DNA_topoisomerase_activity_GO	0.998816	0.0300878	0.0313071	1173.61	35.3532	36.7858	2	431	3	4066
cluster_common_genes	Cluster_vacuolar_proton-transporting_V-type_ATPase,_V1_domain"_GO	0.998816	0.0300878	0.0313071	1173.61	35.3532	36.7858	2	431	3	4066
cluster_common_genes	Cluster_nuclear_microtubule_GO	0.998816	0.0300878	0.0313071	1173.61	35.3532	36.7858	2	431	3	4066
cluster_common_genes	Cluster_intracellular_signaling_cascade_GO	0.998816	0.0300878	0.0313071	1173.61	35.3532	36.7858	2	431	3	4066
cluster_common_genes	Cluster_oysterol_binding_GO	0.998816	0.0300878	0.0313071	1173.61	35.3532	36.7858	2	431	3	4066
cluster_common_genes	Cluster_microtubule_associated_complex_GO	0.998816	0.0300878	0.0313071	1173.61	35.3532	36.7858	2	431	3	4066
cluster_common_genes	Cluster_kinetochore_microtubule_GO	0.998816	0.0300878	0.0313071	1173.61	35.3532	36.7858	2	431	3	4066
cluster_common_genes	Cluster_protein_secretion_GO	0.998816	0.0300878	0.0313071	1173.61	35.3532	36.7858	2	431	3	4066
cluster_common_genes	Cluster_box_C/D_snoRNP_complex_GO	0.998816	0.0300878	0.0313071	1173.61	35.3532	36.7858	2	431	3	4066
cluster_common_genes	Cluster_regulation_of_mitotic_recombination_GO	0.998816	0.0300878	0.0313071	1173.61	35.3532	36.7858	2	431	3	4066
cluster_common_genes	Cluster_phosphatidylinositol_binding_GO	0.998816	0.0300878	0.0313071	1173.61	35.3532	36.7858	2	431	3	4066
cluster_common_genes	Cluster_osmosensory_signaling_pathway_GO	0.998816	0.0300878	0.0313071	1173.61	35.3532	36.7858	2	431	3	4066
cluster_common_genes	Cluster_maintenance_of_cell_polarity_GO	0.998816	0.0300878	0.0313071	1173.61	35.3532	36.7858	2	431	3	4066
cluster_common_genes	Cluster_chromosome_organization_GO	0.998816	0.0300878	0.0313071	1173.61	35.3532	36.7858	2	431	3	4066
cluster_common_genes	Cluster_nuclear_telomere_cap_complex_GO	0.998816	0.0300878	0.0313071	1173.61	35.3532	36.7858	2	431	3	4066
cluster_common_genes	Cluster_anion_transport_GO	0.998816	0.0300878	0.0313071	1173.61	35.3532	36.7858	2	431	3	4066
cluster_common_genes	Cluster_etracellular_region_GO	0.991632	0.0265298	0.0348975	1165.17	31.1725	41.0046	5	431	18	4066
cluster_common_genes	Cluster_negative_regulation_of_transcription_from_RNA_polymerase_II_promoter_GO	0.991632	0.0265298	0.0348975	1165.17	31.1725	41.0046	5	431	18	4066
cluster_common_genes	Cluster_protein_kinase_activity_GO	0.987075	0.023565	0.0364896	1159.81	27.6889	42.8753	8	431	37	4066
cluster_common_genes	Cluster_cell_wall_GO	0.991828	0.0327757	0.0409479	1165.4	38.5114	48.1138	4	431	13	4066
cluster_common_genes	Cluster_hydrolase_activity,_acting_on_acid_anhydrides,_in_phosphorus-containing_anhydrides"_GO	0.991828	0.0327757	0.0409479	1165.4	38.5114	48.1138	4	431	13	4066
cluster_common_genes	Cluster_protein_amino_acid_dephosphorylation_GO	0.991828	0.0327757	0.0409479	1165.4	38.5114	48.1138	4	431	13	4066
cluster_common_genes	Cluster_cytosol_GO	0.978834	0.0221155	0.0432812	1150.13	25.9857	50.8554	14	431	81	4066
cluster_common_genes	Cluster_protein_import_into_nucleus_GO	0.993845	0.0379814	0.044136	1167.77	44.6281	51.8598	3	431	8	4066
cluster_common_genes	Cluster_telomere_maintenance_via_telomerase_GO	0.993845	0.0379814	0.044136	1167.77	44.6281	51.8598	3	431	8	4066
cluster_common_genes	Cluster_condensed_nuclear_chromosome_GO	0.993845	0.0379814	0.044136	1167.77	44.6281	51.8598	3	431	8	4066
cluster_common_genes	Cluster_membrane_fraction_GO	0.984263	0.0344848	0.050222	1156.51	40.5196	59.0108	6	431	26	4066
cluster_common_genes	Cluster_unfolded_protein_binding_GO	0.980926	0.0345881	0.0536618	1152.59	40.641	63.0526	7	431	33	4066
cluster_common_genes	Cluster_loss_of_chromatin_silencing_during_replicative_cell_aging_GO	0.995639	0.0538218	0.0581853	1169.88	63.2406	68.3677	2	431	4	4066
cluster_common_genes	Cluster_protein_phosphatase_type_2A_complex_GO	0.995639	0.0538218	0.0581853	1169.88	63.2406	68.3677	2	431	4	4066
cluster_common_genes	Cluster_RNA_3'-end_processing_GO	0.995639	0.0538218	0.0581853	1169.88	63.2406	68.3677	2	431	4	4066
cluster_common_genes	Cluster_microtubule_binding_GO	0.995639	0.0538218	0.0581853	1169.88	63.2406	68.3677	2	431	4	4066
cluster_common_genes	Cluster_integral_to_mitochondrial_outer_membrane_GO	0.995639	0.0538218	0.0581853	1169.88	63.2406	68.3677	2	431	4	4066
cluster_common_genes	Cluster_TOR_signaling_pathway_GO	0.995639	0.0538218	0.0581853	1169.88	63.2406	68.3677	2	431	4	4066
cluster_common_genes	Cluster_steroid_metabolic_process_GO	0.995639	0.0538218	0.0581853	1169.88	63.2406	68.3677	2	431	4	4066
cluster_common_genes	Cluster_lipid_transport_GO	0.995639	0.0538218	0.0581853	1169.88	63.2406	68.3677	2	431	4	4066
cluster_common_genes	Cluster_ribosomal_large_subunit_export_from_nucleus_GO	0.995639	0.0538218	0.0581853	1169.88	63.2406	68.3677	2	431	4	4066
cluster_common_genes	Cluster_'de_novo'_protein_folding_GO	0.995639	0.0538218	0.0581853	1169.88	63.2406	68.3677	2	431	4	4066
cluster_common_genes	Cluster_mitotic_chromosome_condensation_GO	0.995639	0.0538218	0.0581853	1169.88	63.2406	68.3677	2	431	4	4066
cluster_common_genes	Cluster_multi-eIF_complex_GO	0.995639	0.0538218	0.0581853	1169.88	63.2406	68.3677	2	431	4	4066
cluster_common_genes	Cluster_regulation_of_eit_from_mitosis_GO	0.995639	0.0538218	0.0581853	1169.88	63.2406	68.3677	2	431	4	4066
cluster_common_genes	Cluster_cytosolic_ribosome_GO	0.995639	0.0538218	0.0581853	1169.88	63.2406	68.3677	2	431	4	4066
cluster_common_genes	Cluster_preribosome,_large_subunit_precursor"_GO	0.995639	0.0538218	0.0581853	1169.88	63.2406	68.3677	2	431	4	4066
cluster_common_genes	Cluster_SRP-dependent_cotranslational_protein_targeting_to_membrane,_translocation"_GO	0.995639	0.0538218	0.0581853	1169.88	63.2406	68.3677	2	431	4	4066
cluster_common_genes	Cluster_response_to_heat_GO	0.995639	0.0538218	0.0581853	1169.88	63.2406	68.3677	2	431	4	4066
cluster_common_genes	Cluster_sterol_transport_GO	0.995639	0.0538218	0.0581853	1169.88	63.2406	68.3677	2	431	4	4066
cluster_common_genes	Cluster_traversing_start_control_point_of_mitotic_cell_cycle_GO	0.995639	0.0538218	0.0581853	1169.88	63.2406	68.3677	2	431	4	4066
cluster_common_genes	Cluster_ATP-dependent_3'-5'_DNA_helicase_activity_GO	0.995639	0.0538218	0.0581853	1169.88	63.2406	68.3677	2	431	4	4066
cluster_common_genes	Cluster_cell_budding_GO	0.995639	0.0538218	0.0581853	1169.88	63.2406	68.3677	2	431	4	4066
cluster_common_genes	Cluster_intracellular_mRNA_localization_GO	0.995639	0.0538218	0.0581853	1169.88	63.2406	68.3677	2	431	4	4066
cluster_common_genes	Cluster_translational_termination_GO	0.995639	0.0538218	0.0581853	1169.88	63.2406	68.3677	2	431	4	4066
cluster_common_genes	Cluster_regulation_of_protein_localization_GO	0.995639	0.0538218	0.0581853	1169.88	63.2406	68.3677	2	431	4	4066
cluster_common_genes	Cluster_Leucine_APGcategory	0.995639	0.0538218	0.0581853	1169.88	63.2406	68.3677	2	431	4	4066
cluster_common_genes	Cluster_maturation_of_5.8S_rRNA_from_tricistronic_rRNA_transcript_(SSU-rRNA,_5.8S_rRNA,_LSU-rRNA)"_GO	0.995639	0.0538218	0.0581853	1169.88	63.2406	68.3677	2	431	4	4066
cluster_common_genes	Cluster_RNA_catabolic_process_GO	0.98984	0.0509633	0.0611237	1163.06	59.8819	71.8203	3	431	9	4066
cluster_common_genes	Cluster_filamentous_growth_GO	0.98984	0.0509633	0.0611237	1163.06	59.8819	71.8203	3	431	9	4066
cluster_common_genes	Cluster_motor_activity_GO	0.98984	0.0509633	0.0611237	1163.06	59.8819	71.8203	3	431	9	4066
cluster_common_genes	Cluster_kinase_activity_GO	0.97378	0.0354885	0.061709	1144.19	41.699	72.5081	9	431	48	4066
cluster_common_genes	Cluster_signal_transduction_GO	0.981403	0.045132	0.0637292	1153.15	53.0301	74.8818	5	431	21	4066
cluster_common_genes	Cluster_nuclear_envelope_GO	0.984049	0.0500805	0.0660317	1156.26	58.8446	77.5872	4	431	15	4066
cluster_common_genes	Cluster_metal_ion_binding_GO	0.954812	0.0265865	0.0717743	1121.9	31.2391	84.3348	25	431	175	4066
cluster_common_genes	Cluster_intracellular_protein_transport_GO	0.971705	0.0509707	0.0792655	1141.75	59.8906	93.137	6	431	29	4066
cluster_common_genes	Cluster_cellular_bud_GO	0.984463	0.065124	0.0806609	1156.74	76.5207	94.7766	3	431	10	4066
cluster_common_genes	Cluster_DNA_metabolic_process_GO	0.984463	0.065124	0.0806609	1156.74	76.5207	94.7766	3	431	10	4066
cluster_common_genes	Cluster_G2/M_transition_of_mitotic_cell_cycle_GO	0.984463	0.065124	0.0806609	1156.74	76.5207	94.7766	3	431	10	4066
cluster_common_genes	Cluster_nuclear_chromosome_GO	0.984463	0.065124	0.0806609	1156.74	76.5207	94.7766	3	431	10	4066
cluster_common_genes	Cluster_regulation_of_cell_cycle_GO	0.984463	0.065124	0.0806609	1156.74	76.5207	94.7766	3	431	10	4066
cluster_common_genes	Cluster_signal_transducer_activity_GO	0.984463	0.065124	0.0806609	1156.74	76.5207	94.7766	3	431	10	4066
cluster_common_genes	Cluster_protein_serine/threonine_phosphatase_activity_GO	0.984463	0.065124	0.0806609	1156.74	76.5207	94.7766	3	431	10	4066
cluster_common_genes	Cluster_telomere_maintenance_via_recombination_GO	0.989955	0.0802291	0.0902742	1163.2	94.2692	106.072	2	431	5	4066
cluster_common_genes	Cluster_nuclear_chromosome,_telomeric_region"_GO	0.989955	0.0802291	0.0902742	1163.2	94.2692	106.072	2	431	5	4066
cluster_common_genes	Cluster_termination_of_RNA_polymerase_II_transcription,_poly(A)-coupled"_GO	0.989955	0.0802291	0.0902742	1163.2	94.2692	106.072	2	431	5	4066
cluster_common_genes	Cluster_protein_targeting_to_mitochondrion_GO	0.989955	0.0802291	0.0902742	1163.2	94.2692	106.072	2	431	5	4066
cluster_common_genes	Cluster_NADH_oxidation_GO	0.989955	0.0802291	0.0902742	1163.2	94.2692	106.072	2	431	5	4066
cluster_common_genes	Cluster_transcription_repressor_activity_GO	0.989955	0.0802291	0.0902742	1163.2	94.2692	106.072	2	431	5	4066
cluster_common_genes	Cluster_ubiquitin_protein_ligase_binding_GO	0.989955	0.0802291	0.0902742	1163.2	94.2692	106.072	2	431	5	4066
cluster_common_genes	Cluster_chaperonin-containing_T-complex_GO	0.989955	0.0802291	0.0902742	1163.2	94.2692	106.072	2	431	5	4066
cluster_common_genes	Cluster_nuclear_cohesin_complex_GO	0.989955	0.0802291	0.0902742	1163.2	94.2692	106.072	2	431	5	4066
cluster_common_genes	Cluster_DNA-directed_RNA_polymerase_II,_holoenzyme"_GO	0.989955	0.0802291	0.0902742	1163.2	94.2692	106.072	2	431	5	4066
cluster_common_genes	Cluster_mRNA_cleavage_and_polyadenylation_specificity_factor_complex_GO	0.989955	0.0802291	0.0902742	1163.2	94.2692	106.072	2	431	5	4066
cluster_common_genes	Cluster_DNA-directed_RNA_polymerase_I_complex_GO	0.989955	0.0802291	0.0902742	1163.2	94.2692	106.072	2	431	5	4066
cluster_common_genes	Cluster_rRNA_binding_GO	0.989955	0.0802291	0.0902742	1163.2	94.2692	106.072	2	431	5	4066
cluster_common_genes	Cluster_heteroduple_formation_GO	0.989955	0.0802291	0.0902742	1163.2	94.2692	106.072	2	431	5	4066
cluster_common_genes	Cluster_chromosome,_telomeric_region"_GO	0.972472	0.0698799	0.0974079	1142.65	82.1089	114.454	4	431	17	4066
cluster_common_genes	Cluster_binding_GO	0.948752	0.048674	0.0999218	1114.78	57.1919	117.408	11	431	68	4066
cluster_common_genes	Cluster_actin_binding_GO	0.977591	0.0800964	0.102505	1148.67	94.1133	120.443	3	431	11	4066
cluster_common_genes	Cluster_protein_modification_process_GO	0.977591	0.0800964	0.102505	1148.67	94.1133	120.443	3	431	11	4066
cluster_common_genes	Cluster_condensed_nuclear_chromosome_kinetochore_GO	0.977591	0.0800964	0.102505	1148.67	94.1133	120.443	3	431	11	4066
cluster_common_genes	Cluster_mRNA_catabolic_process_GO	0.977591	0.0800964	0.102505	1148.67	94.1133	120.443	3	431	11	4066
cluster_common_genes	Cluster_protein_export_from_nucleus_GO	0.977591	0.0800964	0.102505	1148.67	94.1133	120.443	3	431	11	4066
cluster_common_genes	Cluster_fungal-type_vacuole_membrane_GO	0.964851	0.0675061	0.102655	1133.7	79.3197	120.62	5	431	24	4066
cluster_common_genes	Cluster_positive_regulation_of_gluconeogenesis_GO	1	0.106001	0.112523	1175	124.551	132.215	1	431	1	4066
cluster_common_genes	Cluster_cell_proliferation_GO	1	0.106001	0.112523	1175	124.551	132.215	1	431	1	4066
cluster_common_genes	Cluster_MAP_kinase_kinase_activity_GO	1	0.106001	0.112523	1175	124.551	132.215	1	431	1	4066
cluster_common_genes	Cluster_cellular_morphogenesis_during_vegetative_growth_GO	1	0.106001	0.112523	1175	124.551	132.215	1	431	1	4066
cluster_common_genes	Cluster_etrinsic_to_internal_side_of_plasma_membrane_GO	1	0.106001	0.112523	1175	124.551	132.215	1	431	1	4066
cluster_common_genes	Cluster_cAMP-dependent_protein_kinase_complex_GO	1	0.106001	0.112523	1175	124.551	132.215	1	431	1	4066
cluster_common_genes	Cluster_nuclear_envelope_lumen_GO	1	0.106001	0.112523	1175	124.551	132.215	1	431	1	4066
cluster_common_genes	Cluster_vacuolar_transporter_chaperone_complex_GO	1	0.106001	0.112523	1175	124.551	132.215	1	431	1	4066
cluster_common_genes	Cluster_negative_regulation_of_translation_GO	1	0.106001	0.112523	1175	124.551	132.215	1	431	1	4066
cluster_common_genes	Cluster_small_GTPase_mediated_signal_transduction_GO	0.965103	0.0803706	0.115268	1134	94.4355	135.44	4	431	18	4066
cluster_common_genes	Cluster_replicative_cell_aging_GO	0.965103	0.0803706	0.115268	1134	94.4355	135.44	4	431	18	4066
cluster_common_genes	Cluster_RNA_elongation_from_RNA_polymerase_II_promoter_GO	0.965103	0.0803706	0.115268	1134	94.4355	135.44	4	431	18	4066
cluster_common_genes	Cluster_iron_ion_binding_GO	0.953675	0.0696399	0.115965	1120.57	81.8269	136.259	6	431	32	4066
cluster_common_genes	Cluster_GTP_binding_GO	0.953675	0.0696399	0.115965	1120.57	81.8269	136.259	6	431	32	4066
cluster_common_genes	Cluster_GTPase_activity_GO	0.957736	0.0754893	0.117753	1125.34	88.6999	138.36	5	431	25	4066
cluster_common_genes	Cluster_chromatin_silencing_at_rDNA_GO	0.98148	0.107631	0.126151	1153.24	126.466	148.227	2	431	6	4066
cluster_common_genes	Cluster_endomembrane_system_GO	0.98148	0.107631	0.126151	1153.24	126.466	148.227	2	431	6	4066
cluster_common_genes	Cluster_condensed_nuclear_chromosome,_centromeric_region"_GO	0.98148	0.107631	0.126151	1153.24	126.466	148.227	2	431	6	4066
cluster_common_genes	Cluster_positive_regulation_of_transcription_GO	0.98148	0.107631	0.126151	1153.24	126.466	148.227	2	431	6	4066
cluster_common_genes	Cluster_DNA_unwinding_during_replication_GO	0.98148	0.107631	0.126151	1153.24	126.466	148.227	2	431	6	4066
cluster_common_genes	Cluster_mitochondrial_nucleoid_GO	0.98148	0.107631	0.126151	1153.24	126.466	148.227	2	431	6	4066
cluster_common_genes	Cluster_conjugation_with_cellular_fusion_GO	0.98148	0.107631	0.126151	1153.24	126.466	148.227	2	431	6	4066
cluster_common_genes	Cluster_site_of_polarized_growth_GO	0.98148	0.107631	0.126151	1153.24	126.466	148.227	2	431	6	4066
cluster_common_genes	Cluster_protein_targeting_to_membrane_GO	0.98148	0.107631	0.126151	1153.24	126.466	148.227	2	431	6	4066
cluster_common_genes	Cluster_DNA_topological_change_GO	0.98148	0.107631	0.126151	1153.24	126.466	148.227	2	431	6	4066
cluster_common_genes	Cluster_maturation_of_LSU-rRNA_from_tricistronic_rRNA_transcript_(SSU-rRNA,_5.8S_rRNA,_LSU-rRNA)"_GO	0.98148	0.107631	0.126151	1153.24	126.466	148.227	2	431	6	4066
cluster_common_genes	Cluster_hydrolase_activity,_acting_on_ester_bonds"_GO	0.98148	0.107631	0.126151	1153.24	126.466	148.227	2	431	6	4066
cluster_common_genes	Cluster_ATP-dependent_chromatin_remodeling_GO	0.98148	0.107631	0.126151	1153.24	126.466	148.227	2	431	6	4066
cluster_common_genes	Cluster_histone_acetyltransferase_activity_GO	0.98148	0.107631	0.126151	1153.24	126.466	148.227	2	431	6	4066
cluster_common_genes	Cluster_proton-transporting_ATPase_activity,_rotational_mechanism"_GO	0.98148	0.107631	0.126151	1153.24	126.466	148.227	2	431	6	4066
cluster_common_genes	Cluster_vacuole_inheritance_GO	0.98148	0.107631	0.126151	1153.24	126.466	148.227	2	431	6	4066
cluster_common_genes	Cluster_cellular_respiration_GO	0.969137	0.0955232	0.126386	1138.74	112.24	148.504	3	431	12	4066
cluster_common_genes	Cluster_DNA_replication_origin_binding_GO	0.969137	0.0955232	0.126386	1138.74	112.24	148.504	3	431	12	4066
cluster_common_genes	Cluster_exocytosis_GO	0.969137	0.0955232	0.126386	1138.74	112.24	148.504	3	431	12	4066
cluster_common_genes	Cluster_specific_RNA_polymerase_II_transcription_factor_activity_GO	0.969137	0.0955232	0.126386	1138.74	112.24	148.504	3	431	12	4066
cluster_common_genes	Cluster_nucleoside-triphosphatase_activity_GO	0.946338	0.0761482	0.12981	1111.95	89.4741	152.527	6	431	33	4066
cluster_common_genes	Cluster_transport_GO	0.906703	0.0403657	0.133662	1065.38	47.4297	157.053	29	431	222	4066
cluster_common_genes	Cluster_rRNA_export_from_nucleus_GO	0.956625	0.0910642	0.134439	1124.03	107	157.966	4	431	19	4066
cluster_common_genes	Cluster_G1/S_transition_of_mitotic_cell_cycle_GO	0.956625	0.0910642	0.134439	1124.03	107	157.966	4	431	19	4066
cluster_common_genes	Cluster_mRNA_transport_GO	0.956625	0.0910642	0.134439	1124.03	107	157.966	4	431	19	4066
cluster_common_genes	Cluster_response_to_DNA_damage_stimulus_GO	0.92924	0.0637677	0.134527	1091.86	74.927	158.069	10	431	64	4066
cluster_common_genes	Cluster_proteolysis_GO	0.926218	0.0700534	0.143836	1088.31	82.3127	169.007	9	431	57	4066
cluster_common_genes	Cluster_rRNAprocessing_APGcategory	0.940962	0.0917924	0.150831	1105.63	107.856	177.226	5	431	27	4066
cluster_common_genes	Cluster_incipient_cellular_bud_site_GO	0.959052	0.11107	0.152018	1126.89	130.507	178.621	3	431	13	4066
cluster_common_genes	Cluster_structural_molecule_activity_GO	0.947016	0.10182	0.154803	1112.74	119.638	181.894	4	431	20	4066
cluster_common_genes	Cluster_DNA_repair_GO	0.915437	0.071113	0.155676	1075.64	83.5578	182.919	10	431	66	4066
cluster_common_genes	Cluster_cyclin-dependent_protein_kinase_regulator_activity_GO	0.970107	0.134761	0.164654	1139.88	158.344	193.468	2	431	7	4066
cluster_common_genes	Cluster_telomeric_DNA_binding_GO	0.970107	0.134761	0.164654	1139.88	158.344	193.468	2	431	7	4066
cluster_common_genes	Cluster_mitotic_spindle_elongation_GO	0.970107	0.134761	0.164654	1139.88	158.344	193.468	2	431	7	4066
cluster_common_genes	Cluster_enzyme_regulator_activity_GO	0.970107	0.134761	0.164654	1139.88	158.344	193.468	2	431	7	4066
cluster_common_genes	Cluster_cofactor_metabolic_process_GO	0.970107	0.134761	0.164654	1139.88	158.344	193.468	2	431	7	4066
cluster_common_genes	Cluster_mRNA_metabolic_process_GO	0.970107	0.134761	0.164654	1139.88	158.344	193.468	2	431	7	4066
cluster_common_genes	Cluster_double-strand_break_repair_GO	0.970107	0.134761	0.164654	1139.88	158.344	193.468	2	431	7	4066
cluster_common_genes	Cluster_mRNA_polyadenylation_GO	0.970107	0.134761	0.164654	1139.88	158.344	193.468	2	431	7	4066
cluster_common_genes	Cluster_ATPase_activity,_coupled"_GO	0.970107	0.134761	0.164654	1139.88	158.344	193.468	2	431	7	4066
cluster_common_genes	Cluster_actin_cortical_patch_GO	0.970107	0.134761	0.164654	1139.88	158.344	193.468	2	431	7	4066
cluster_common_genes	Cluster_kinetochore_GO	0.970107	0.134761	0.164654	1139.88	158.344	193.468	2	431	7	4066
cluster_common_genes	Cluster_protein_folding_GO	0.920178	0.0958757	0.175698	1081.21	112.654	206.445	6	431	36	4066
cluster_common_genes	Cluster_Mitochondria_APGcategory	0.920178	0.0958757	0.175698	1081.21	112.654	206.445	6	431	36	4066
cluster_common_genes	Cluster_ascospore_formation_GO	0.936271	0.112503	0.176233	1100.12	132.191	207.074	4	431	21	4066
cluster_common_genes	Cluster_mRNA_export_from_nucleus_GO	0.924395	0.122989	0.198594	1086.16	144.512	233.348	4	431	22	4066
cluster_common_genes	Cluster_chromosome_segregation_GO	0.924395	0.122989	0.198594	1086.16	144.512	233.348	4	431	22	4066
cluster_common_genes	Cluster_Ino80_complex_GO	0.988787	0.189576	0.201243	1161.82	222.752	236.461	1	431	2	4066
cluster_common_genes	Cluster_GARP_complex_GO	0.988787	0.189576	0.201243	1161.82	222.752	236.461	1	431	2	4066
cluster_common_genes	Cluster_protein_targeting_to_ER_GO	0.988787	0.189576	0.201243	1161.82	222.752	236.461	1	431	2	4066
cluster_common_genes	Cluster_protein_metabolic_process_GO	0.988787	0.189576	0.201243	1161.82	222.752	236.461	1	431	2	4066
cluster_common_genes	Cluster_mating_type_switching_GO	0.988787	0.189576	0.201243	1161.82	222.752	236.461	1	431	2	4066
cluster_common_genes	Cluster_UDP-glycosyltransferase_activity_GO	0.988787	0.189576	0.201243	1161.82	222.752	236.461	1	431	2	4066
cluster_common_genes	Cluster_proteasome_core_complex,_beta-subunit_complex"_GO	0.988787	0.189576	0.201243	1161.82	222.752	236.461	1	431	2	4066
cluster_common_genes	Cluster_response_to_pH_GO	0.988787	0.189576	0.201243	1161.82	222.752	236.461	1	431	2	4066
cluster_common_genes	Cluster_cytoplasmic_microtubule_GO	0.988787	0.189576	0.201243	1161.82	222.752	236.461	1	431	2	4066
cluster_common_genes	Cluster_oygen_and_reactive_oygen_species_metabolic_process_GO	0.988787	0.189576	0.201243	1161.82	222.752	236.461	1	431	2	4066
cluster_common_genes	Cluster_protein_phosphatase_type_1_regulator_activity_GO	0.988787	0.189576	0.201243	1161.82	222.752	236.461	1	431	2	4066
cluster_common_genes	Cluster_septin_complex_GO	0.988787	0.189576	0.201243	1161.82	222.752	236.461	1	431	2	4066
cluster_common_genes	Cluster_positive_regulation_of_specific_transcription_from_RNA_polymerase_II_promoter_GO	0.988787	0.189576	0.201243	1161.82	222.752	236.461	1	431	2	4066
cluster_common_genes	Cluster_central_plaque_of_spindle_pole_body_GO	0.988787	0.189576	0.201243	1161.82	222.752	236.461	1	431	2	4066
cluster_common_genes	Cluster_positive_regulation_of_transcription,_DNA-dependent"_GO	0.988787	0.189576	0.201243	1161.82	222.752	236.461	1	431	2	4066
cluster_common_genes	Cluster_reproductive_cellular_process_GO	0.988787	0.189576	0.201243	1161.82	222.752	236.461	1	431	2	4066
cluster_common_genes	Cluster_actin_filament_binding_GO	0.988787	0.189576	0.201243	1161.82	222.752	236.461	1	431	2	4066
cluster_common_genes	Cluster_endoribonuclease_activity_GO	0.988787	0.189576	0.201243	1161.82	222.752	236.461	1	431	2	4066
cluster_common_genes	Cluster_SWI/SNF_complex_GO	0.988787	0.189576	0.201243	1161.82	222.752	236.461	1	431	2	4066
cluster_common_genes	Cluster_poly(A)_binding_GO	0.988787	0.189576	0.201243	1161.82	222.752	236.461	1	431	2	4066
cluster_common_genes	Cluster_rRNA_modification_GO	0.988787	0.189576	0.201243	1161.82	222.752	236.461	1	431	2	4066
cluster_common_genes	Cluster_pyruvate_metabolic_process_GO	0.988787	0.189576	0.201243	1161.82	222.752	236.461	1	431	2	4066
cluster_common_genes	Cluster_COPII_vesicle_coat_GO	0.988787	0.189576	0.201243	1161.82	222.752	236.461	1	431	2	4066
cluster_common_genes	Cluster_U2-dependent_spliceosome_GO	0.988787	0.189576	0.201243	1161.82	222.752	236.461	1	431	2	4066
cluster_common_genes	Cluster_establishment_or_maintenance_of_actin_cytoskeleton_polarity_GO	0.988787	0.189576	0.201243	1161.82	222.752	236.461	1	431	2	4066
cluster_common_genes	Cluster_response_to_cycloheximide_GO	0.988787	0.189576	0.201243	1161.82	222.752	236.461	1	431	2	4066
cluster_common_genes	Cluster_AMP-activated_protein_kinase_complex_GO	0.988787	0.189576	0.201243	1161.82	222.752	236.461	1	431	2	4066
cluster_common_genes	Cluster_four-way_junction_helicase_activity_GO	0.988787	0.189576	0.201243	1161.82	222.752	236.461	1	431	2	4066
cluster_common_genes	Cluster_AMP-activated_protein_kinase_activity_GO	0.988787	0.189576	0.201243	1161.82	222.752	236.461	1	431	2	4066
cluster_common_genes	Cluster_nuclear_migration_along_microtubule_GO	0.988787	0.189576	0.201243	1161.82	222.752	236.461	1	431	2	4066
cluster_common_genes	Cluster_astral_microtubule_GO	0.988787	0.189576	0.201243	1161.82	222.752	236.461	1	431	2	4066
cluster_common_genes	Cluster_late_endosome_to_vacuole_transport_via_multivesicular_body_sorting_pathway_GO	0.988787	0.189576	0.201243	1161.82	222.752	236.461	1	431	2	4066
cluster_common_genes	Cluster_small_nuclear_ribonucleoprotein_complex_GO	0.988787	0.189576	0.201243	1161.82	222.752	236.461	1	431	2	4066
cluster_common_genes	Cluster_ribosome_binding_GO	0.988787	0.189576	0.201243	1161.82	222.752	236.461	1	431	2	4066
cluster_common_genes	Cluster_Ras_GTPase_activator_activity_GO	0.988787	0.189576	0.201243	1161.82	222.752	236.461	1	431	2	4066
cluster_common_genes	Cluster_nucleobase_transmembrane_transporter_activity_GO	0.988787	0.189576	0.201243	1161.82	222.752	236.461	1	431	2	4066
cluster_common_genes	Cluster_vacuolar_protein_catabolic_process_GO	0.909333	0.115971	0.206638	1068.47	136.266	242.8	5	431	30	4066
cluster_common_genes	Cluster_histone_acetylation_GO	0.933968	0.141349	0.20738	1097.41	166.085	243.672	3	431	15	4066
cluster_common_genes	Cluster_establishment_of_cell_polarity_GO	0.933968	0.141349	0.20738	1097.41	166.085	243.672	3	431	15	4066
cluster_common_genes	Cluster_zinc_ion_binding_GO	0.863586	0.0709699	0.207384	1014.71	83.3896	243.676	16	431	121	4066
cluster_common_genes	Cluster_regulation_of_transcription_GO	0.911408	0.133161	0.221753	1070.9	156.464	260.56	4	431	23	4066
cluster_common_genes	Cluster_protein_transporter_activity_GO	0.911408	0.133161	0.221753	1070.9	156.464	260.56	4	431	23	4066
cluster_common_genes	Cluster_endocytosis_GO	0.919034	0.155587	0.236553	1079.86	182.815	277.95	3	431	16	4066
cluster_common_genes	Cluster_soluble_fraction_GO	0.919034	0.155587	0.236553	1079.86	182.815	277.95	3	431	16	4066
cluster_common_genes	Cluster_protein_transport_GO	0.827975	0.0731068	0.245131	972.871	85.9005	288.029	19	431	151	4066
cluster_common_genes	Cluster_Tryptophan_APGcategory	0.938876	0.184761	0.245885	1103.18	217.094	288.915	2	431	9	4066
cluster_common_genes	Cluster_microsome_GO	0.938876	0.184761	0.245885	1103.18	217.094	288.915	2	431	9	4066
cluster_common_genes	Cluster_nucleosome_assembly_GO	0.938876	0.184761	0.245885	1103.18	217.094	288.915	2	431	9	4066
cluster_common_genes	Cluster_cellular_alcohol_metabolic_process_GO	0.938876	0.184761	0.245885	1103.18	217.094	288.915	2	431	9	4066
cluster_common_genes	Cluster_manganese_ion_binding_GO	0.902592	0.168962	0.26637	1060.55	198.53	312.985	3	431	17	4066
cluster_common_genes	Cluster_general_RNA_polymerase_II_transcription_factor_activity_GO	0.902592	0.168962	0.26637	1060.55	198.53	312.985	3	431	17	4066
cluster_common_genes	Cluster_protein_complex_GO	0.902592	0.168962	0.26637	1060.55	198.53	312.985	3	431	17	4066
cluster_common_genes	Cluster_mitochondrial_outer_membrane_GO	0.882247	0.152166	0.269919	1036.64	178.795	317.155	4	431	25	4066
cluster_common_genes	Cluster_regulation_of_chromatin_silencing_at_telomere_GO	0.968729	0.254277	0.285584	1138.26	298.775	335.561	1	431	3	4066
cluster_common_genes	Cluster_nuclear_migration_GO	0.968729	0.254277	0.285584	1138.26	298.775	335.561	1	431	3	4066
cluster_common_genes	Cluster_perinuclear_region_of_cytoplasm_GO	0.968729	0.254277	0.285584	1138.26	298.775	335.561	1	431	3	4066
cluster_common_genes	Cluster_ribonucleoside-diphosphate_reductase_complex_GO	0.968729	0.254277	0.285584	1138.26	298.775	335.561	1	431	3	4066
cluster_common_genes	Cluster_ER_to_Golgi_transport_vesicle_GO	0.968729	0.254277	0.285584	1138.26	298.775	335.561	1	431	3	4066
cluster_common_genes	Cluster_cell_wall-bounded_periplasmic_space_GO	0.968729	0.254277	0.285584	1138.26	298.775	335.561	1	431	3	4066
cluster_common_genes	Cluster_prospore_membrane_GO	0.968729	0.254277	0.285584	1138.26	298.775	335.561	1	431	3	4066
cluster_common_genes	Cluster_termination_of_RNA_polymerase_II_transcription,_poly(A)-independent"_GO	0.968729	0.254277	0.285584	1138.26	298.775	335.561	1	431	3	4066
cluster_common_genes	Cluster_alcohol_dehydrogenase_activity_GO	0.968729	0.254277	0.285584	1138.26	298.775	335.561	1	431	3	4066
cluster_common_genes	Cluster_G-protein_coupled_receptor_protein_signaling_pathway_GO	0.968729	0.254277	0.285584	1138.26	298.775	335.561	1	431	3	4066
cluster_common_genes	Cluster_ammonium_transport_GO	0.968729	0.254277	0.285584	1138.26	298.775	335.561	1	431	3	4066
cluster_common_genes	Cluster_NAD_or_NADH_binding_GO	0.968729	0.254277	0.285584	1138.26	298.775	335.561	1	431	3	4066
cluster_common_genes	Cluster_snRNP_U6_GO	0.968729	0.254277	0.285584	1138.26	298.775	335.561	1	431	3	4066
cluster_common_genes	Cluster_dephosphorylation_GO	0.968729	0.254277	0.285584	1138.26	298.775	335.561	1	431	3	4066
cluster_common_genes	Cluster_ARF_GTPase_activator_activity_GO	0.968729	0.254277	0.285584	1138.26	298.775	335.561	1	431	3	4066
cluster_common_genes	Cluster_transcription_elongation_factor_complex_GO	0.968729	0.254277	0.285584	1138.26	298.775	335.561	1	431	3	4066
cluster_common_genes	Cluster_adenyl-nucleotide_echange_factor_activity_GO	0.968729	0.254277	0.285584	1138.26	298.775	335.561	1	431	3	4066
cluster_common_genes	Cluster_chronological_cell_aging_GO	0.968729	0.254277	0.285584	1138.26	298.775	335.561	1	431	3	4066
cluster_common_genes	Cluster_chaperone-mediated_protein_complex_assembly_GO	0.968729	0.254277	0.285584	1138.26	298.775	335.561	1	431	3	4066
cluster_common_genes	Cluster_RNA-dependent_ATPase_activity_GO	0.968729	0.254277	0.285584	1138.26	298.775	335.561	1	431	3	4066
cluster_common_genes	Cluster_actin_filament-based_process_GO	0.968729	0.254277	0.285584	1138.26	298.775	335.561	1	431	3	4066
cluster_common_genes	Cluster_microtubule-based_process_GO	0.968729	0.254277	0.285584	1138.26	298.775	335.561	1	431	3	4066
cluster_common_genes	Cluster_regulation_of_meiosis_GO	0.968729	0.254277	0.285584	1138.26	298.775	335.561	1	431	3	4066
cluster_common_genes	Cluster_ammonium_transmembrane_transporter_activity_GO	0.968729	0.254277	0.285584	1138.26	298.775	335.561	1	431	3	4066
cluster_common_genes	Cluster_eukaryotic_translation_initiation_factor_3_complex_GO	0.968729	0.254277	0.285584	1138.26	298.775	335.561	1	431	3	4066
cluster_common_genes	Cluster_ATPase_activity,_coupled_to_transmembrane_movement_of_ions,_phosphorylative_mechanism"_GO	0.968729	0.254277	0.285584	1138.26	298.775	335.561	1	431	3	4066
cluster_common_genes	Cluster_transferase_activity,_transferring_nitrogenous_groups"_GO	0.968729	0.254277	0.285584	1138.26	298.775	335.561	1	431	3	4066
cluster_common_genes	Cluster_etrinsic_to_plasma_membrane_GO	0.968729	0.254277	0.285584	1138.26	298.775	335.561	1	431	3	4066
cluster_common_genes	Cluster_phosphotransferase_activity,_for_other_substituted_phosphate_groups"_GO	0.968729	0.254277	0.285584	1138.26	298.775	335.561	1	431	3	4066
cluster_common_genes	Cluster_regulation_of_ARF_GTPase_activity_GO	0.968729	0.254277	0.285584	1138.26	298.775	335.561	1	431	3	4066
cluster_common_genes	Cluster_amino_acid_catabolic_process_to_alcohol_via_Ehrlich_pathway_GO	0.968729	0.254277	0.285584	1138.26	298.775	335.561	1	431	3	4066
cluster_common_genes	Cluster_nitrogen_utilization_GO	0.968729	0.254277	0.285584	1138.26	298.775	335.561	1	431	3	4066
cluster_common_genes	Cluster_spindle_midzone_GO	0.968729	0.254277	0.285584	1138.26	298.775	335.561	1	431	3	4066
cluster_common_genes	Cluster_transcription_elongation_regulator_activity_GO	0.968729	0.254277	0.285584	1138.26	298.775	335.561	1	431	3	4066
cluster_common_genes	Cluster_RNA_polymerase_II_transcription_elongation_factor_activity_GO	0.968729	0.254277	0.285584	1138.26	298.775	335.561	1	431	3	4066
cluster_common_genes	Cluster_glutathione_peroxidase_activity_GO	0.968729	0.254277	0.285584	1138.26	298.775	335.561	1	431	3	4066
cluster_common_genes	Cluster_protein_tyrosine_kinase_activity_GO	0.968729	0.254277	0.285584	1138.26	298.775	335.561	1	431	3	4066
cluster_common_genes	Cluster_CORVET_complex_GO	0.968729	0.254277	0.285584	1138.26	298.775	335.561	1	431	3	4066
cluster_common_genes	Cluster_RENT_complex_GO	0.968729	0.254277	0.285584	1138.26	298.775	335.561	1	431	3	4066
cluster_common_genes	Cluster_trehalose_biosynthetic_process_GO	0.968729	0.254277	0.285584	1138.26	298.775	335.561	1	431	3	4066
cluster_common_genes	Cluster_ribonucleoside_binding_GO	0.968729	0.254277	0.285584	1138.26	298.775	335.561	1	431	3	4066
cluster_common_genes	Cluster_organelle_inheritance_GO	0.968729	0.254277	0.285584	1138.26	298.775	335.561	1	431	3	4066
cluster_common_genes	Cluster_MCM_complex_GO	0.968729	0.254277	0.285584	1138.26	298.775	335.561	1	431	3	4066
cluster_common_genes	Cluster_protein_stabilization_GO	0.968729	0.254277	0.285584	1138.26	298.775	335.561	1	431	3	4066
cluster_common_genes	Cluster_protein_urmylation_GO	0.968729	0.254277	0.285584	1138.26	298.775	335.561	1	431	3	4066
cluster_common_genes	Cluster_ribonucleoside-diphosphate_reductase_activity_GO	0.968729	0.254277	0.285584	1138.26	298.775	335.561	1	431	3	4066
cluster_common_genes	Cluster_transition_metal_ion_binding_GO	0.968729	0.254277	0.285584	1138.26	298.775	335.561	1	431	3	4066
cluster_common_genes	Cluster_regulation_of_translational_fidelity_GO	0.968729	0.254277	0.285584	1138.26	298.775	335.561	1	431	3	4066
cluster_common_genes	Cluster_monooygenase_activity_GO	0.968729	0.254277	0.285584	1138.26	298.775	335.561	1	431	3	4066
cluster_common_genes	Cluster_ribonuclease_activity_GO	0.968729	0.254277	0.285584	1138.26	298.775	335.561	1	431	3	4066
cluster_common_genes	Cluster_fermentation_GO	0.968729	0.254277	0.285584	1138.26	298.775	335.561	1	431	3	4066
cluster_common_genes	Cluster_cytoplasmic_mRNA_processing_body_assembly_GO	0.968729	0.254277	0.285584	1138.26	298.775	335.561	1	431	3	4066
cluster_common_genes	Cluster_peptide_binding_GO	0.968729	0.254277	0.285584	1138.26	298.775	335.561	1	431	3	4066
cluster_common_genes	Cluster_leading_strand_elongation_GO	0.968729	0.254277	0.285584	1138.26	298.775	335.561	1	431	3	4066
cluster_common_genes	Cluster_manganese_ion_transmembrane_transporter_activity_GO	0.968729	0.254277	0.285584	1138.26	298.775	335.561	1	431	3	4066
cluster_common_genes	Cluster_post-Golgi_vesicle-mediated_transport_GO	0.968729	0.254277	0.285584	1138.26	298.775	335.561	1	431	3	4066
cluster_common_genes	Cluster_cysteine-type_peptidase_activity_GO	0.919339	0.20653	0.287191	1080.22	242.673	337.449	2	431	10	4066
cluster_common_genes	Cluster_single-stranded_DNA_binding_GO	0.919339	0.20653	0.287191	1080.22	242.673	337.449	2	431	10	4066
cluster_common_genes	Cluster_etrinsic_to_membrane_GO	0.919339	0.20653	0.287191	1080.22	242.673	337.449	2	431	10	4066
cluster_common_genes	Cluster_nucleobase,_nucleoside,_nucleotide_and_nucleic_acid_metabolic_process"_GO	0.919339	0.20653	0.287191	1080.22	242.673	337.449	2	431	10	4066
cluster_common_genes	Cluster_U4/U6__U5_tri-snRNP_complex_GO	0.919339	0.20653	0.287191	1080.22	242.673	337.449	2	431	10	4066
cluster_common_genes	Cluster_cytoskeleton_organization_GO	0.919339	0.20653	0.287191	1080.22	242.673	337.449	2	431	10	4066
cluster_common_genes	Cluster_Spellman_S_peak	0.833321	0.126363	0.293043	979.152	148.477	344.326	7	431	51	4066
cluster_common_genes	Cluster_RNA_modification_GO	0.866168	0.16083	0.294662	1017.75	188.975	346.228	4	431	26	4066
cluster_common_genes	Cluster_spliceosome_GO	0.866168	0.16083	0.294662	1017.75	188.975	346.228	4	431	26	4066
cluster_common_genes	Cluster_DNA_recombination_GO	0.884732	0.181322	0.29659	1039.56	213.053	348.493	3	431	18	4066
cluster_common_genes	Cluster_carbohydrate_metabolic_process_GO	0.849169	0.168845	0.319676	997.774	198.393	375.619	4	431	27	4066
cluster_common_genes	Cluster_nuclease_activity_GO	0.849169	0.168845	0.319676	997.774	198.393	375.619	4	431	27	4066
cluster_common_genes	Cluster_pseudohyphal_growth_GO	0.865561	0.192554	0.326993	1017.03	226.251	384.217	3	431	19	4066
cluster_common_genes	Cluster_protein_ubiquitination_GO	0.865561	0.192554	0.326993	1017.03	226.251	384.217	3	431	19	4066
cluster_common_genes	Cluster_nuclear_membrane_GO	0.865561	0.192554	0.326993	1017.03	226.251	384.217	3	431	19	4066
cluster_common_genes	Cluster_snRNP_protein_import_into_nucleus_GO	0.897495	0.225726	0.328232	1054.56	265.228	385.673	2	431	11	4066
cluster_common_genes	Cluster_NLS-bearing_substrate_import_into_nucleus_GO	0.897495	0.225726	0.328232	1054.56	265.228	385.673	2	431	11	4066
cluster_common_genes	Cluster_mRNA-binding_(hnRNP)_protein_import_into_nucleus_GO	0.897495	0.225726	0.328232	1054.56	265.228	385.673	2	431	11	4066
cluster_common_genes	Cluster_snRNA_export_from_nucleus_GO	0.897495	0.225726	0.328232	1054.56	265.228	385.673	2	431	11	4066
cluster_common_genes	Cluster_ribosomal_protein_import_into_nucleus_GO	0.897495	0.225726	0.328232	1054.56	265.228	385.673	2	431	11	4066
cluster_common_genes	Cluster_vacuolar_membrane_GO	0.824302	0.157034	0.332732	968.555	184.515	390.96	5	431	36	4066
cluster_common_genes	Cluster_Spellman_S/G2_peak	0.772044	0.124578	0.352534	907.152	146.379	414.227	9	431	72	4066
cluster_common_genes	Cluster_Spellman_M-G1_peak	0.772044	0.124578	0.352534	907.152	146.379	414.227	9	431	72	4066
cluster_common_genes	Cluster_RNA_splicing_factor_activity,_transesterification_mechanism"_GO	0.845197	0.202576	0.35738	993.106	238.027	419.921	3	431	20	4066
cluster_common_genes	Cluster_hyperosmotic_response_GO	0.941818	0.303154	0.361339	1106.64	356.206	424.573	1	431	4	4066
cluster_common_genes	Cluster_aging_GO	0.941818	0.303154	0.361339	1106.64	356.206	424.573	1	431	4	4066
cluster_common_genes	Cluster_ribosome_export_from_nucleus_GO	0.941818	0.303154	0.361339	1106.64	356.206	424.573	1	431	4	4066
cluster_common_genes	Cluster_5'-3'_exonuclease_activity_GO	0.941818	0.303154	0.361339	1106.64	356.206	424.573	1	431	4	4066
cluster_common_genes	Cluster_ATP_biosynthetic_process_GO	0.941818	0.303154	0.361339	1106.64	356.206	424.573	1	431	4	4066
cluster_common_genes	Cluster_manganese_ion_transport_GO	0.941818	0.303154	0.361339	1106.64	356.206	424.573	1	431	4	4066
cluster_common_genes	Cluster_nuclear-transcribed_mRNA_poly(A)_tail_shortening_GO	0.941818	0.303154	0.361339	1106.64	356.206	424.573	1	431	4	4066
cluster_common_genes	Cluster_negative_regulation_of_transcription_GO	0.941818	0.303154	0.361339	1106.64	356.206	424.573	1	431	4	4066
cluster_common_genes	Cluster_spindle_pole_GO	0.941818	0.303154	0.361339	1106.64	356.206	424.573	1	431	4	4066
cluster_common_genes	Cluster_vesicle_docking_during_exocytosis_GO	0.941818	0.303154	0.361339	1106.64	356.206	424.573	1	431	4	4066
cluster_common_genes	Cluster_structural_constituent_of_cell_wall_GO	0.941818	0.303154	0.361339	1106.64	356.206	424.573	1	431	4	4066
cluster_common_genes	Cluster_transcription_cofactor_activity_GO	0.941818	0.303154	0.361339	1106.64	356.206	424.573	1	431	4	4066
cluster_common_genes	Cluster_small_nucleolar_ribonucleoprotein_complex_GO	0.941818	0.303154	0.361339	1106.64	356.206	424.573	1	431	4	4066
cluster_common_genes	Cluster_threonine-type_endopeptidase_activity_GO	0.941818	0.303154	0.361339	1106.64	356.206	424.573	1	431	4	4066
cluster_common_genes	Cluster_protein_localization_to_pre-autophagosomal_structure_GO	0.941818	0.303154	0.361339	1106.64	356.206	424.573	1	431	4	4066
cluster_common_genes	Cluster_potassium_ion_binding_GO	0.941818	0.303154	0.361339	1106.64	356.206	424.573	1	431	4	4066
cluster_common_genes	Cluster_organic_acid_metabolic_process_GO	0.941818	0.303154	0.361339	1106.64	356.206	424.573	1	431	4	4066
cluster_common_genes	Cluster_nuclear_nucleosome_GO	0.941818	0.303154	0.361339	1106.64	356.206	424.573	1	431	4	4066
cluster_common_genes	Cluster_cellular_protein_metabolic_process_GO	0.941818	0.303154	0.361339	1106.64	356.206	424.573	1	431	4	4066
cluster_common_genes	Cluster_regulation_of_cell_growth_GO	0.941818	0.303154	0.361339	1106.64	356.206	424.573	1	431	4	4066
cluster_common_genes	Cluster_CCR4-NOT_core_complex_GO	0.941818	0.303154	0.361339	1106.64	356.206	424.573	1	431	4	4066
cluster_common_genes	Cluster_response_to_temperature_stimulus_GO	0.941818	0.303154	0.361339	1106.64	356.206	424.573	1	431	4	4066
cluster_common_genes	Cluster_proteasome_core_complex_GO	0.941818	0.303154	0.361339	1106.64	356.206	424.573	1	431	4	4066
cluster_common_genes	Cluster_transaminase_activity_GO	0.941818	0.303154	0.361339	1106.64	356.206	424.573	1	431	4	4066
cluster_common_genes	Cluster_integral_to_plasma_membrane_GO	0.941818	0.303154	0.361339	1106.64	356.206	424.573	1	431	4	4066
cluster_common_genes	Cluster_ATPase_activator_activity_GO	0.941818	0.303154	0.361339	1106.64	356.206	424.573	1	431	4	4066
cluster_common_genes	Cluster_glucose_mediated_signaling_GO	0.941818	0.303154	0.361339	1106.64	356.206	424.573	1	431	4	4066
cluster_common_genes	Cluster_RSC_complex_GO	0.941818	0.303154	0.361339	1106.64	356.206	424.573	1	431	4	4066
cluster_common_genes	Cluster_mismatch_repair_GO	0.941818	0.303154	0.361339	1106.64	356.206	424.573	1	431	4	4066
cluster_common_genes	Cluster_peroxisome_degradation_GO	0.941818	0.303154	0.361339	1106.64	356.206	424.573	1	431	4	4066
cluster_common_genes	Cluster_protein_import_into_mitochondrial_intermembrane_space_GO	0.941818	0.303154	0.361339	1106.64	356.206	424.573	1	431	4	4066
cluster_common_genes	Cluster_microtubule_nucleation_GO	0.941818	0.303154	0.361339	1106.64	356.206	424.573	1	431	4	4066
cluster_common_genes	Cluster_kinetochore_assembly_GO	0.941818	0.303154	0.361339	1106.64	356.206	424.573	1	431	4	4066
cluster_common_genes	Cluster_amino_acid_transmembrane_transporter_activity_GO	0.941818	0.303154	0.361339	1106.64	356.206	424.573	1	431	4	4066
cluster_common_genes	Cluster_phospholipid_binding_GO	0.941818	0.303154	0.361339	1106.64	356.206	424.573	1	431	4	4066
cluster_common_genes	Cluster_mRNA_3'-end_processing_GO	0.941818	0.303154	0.361339	1106.64	356.206	424.573	1	431	4	4066
cluster_common_genes	Cluster_membrane_fusion_GO	0.941818	0.303154	0.361339	1106.64	356.206	424.573	1	431	4	4066
cluster_common_genes	Cluster_Ada2/Gcn5/Ada3_transcription_activator_complex_GO	0.941818	0.303154	0.361339	1106.64	356.206	424.573	1	431	4	4066
cluster_common_genes	Cluster_synapsis_GO	0.941818	0.303154	0.361339	1106.64	356.206	424.573	1	431	4	4066
cluster_common_genes	Cluster_protein_autoubiquitination_GO	0.941818	0.303154	0.361339	1106.64	356.206	424.573	1	431	4	4066
cluster_common_genes	Cluster_proteasome_regulatory_particle,_lid_subcomplex"_GO	0.941818	0.303154	0.361339	1106.64	356.206	424.573	1	431	4	4066
cluster_common_genes	Cluster_microautophagy_GO	0.941818	0.303154	0.361339	1106.64	356.206	424.573	1	431	4	4066
cluster_common_genes	Cluster_cellular_bud_neck_septin_ring_GO	0.941818	0.303154	0.361339	1106.64	356.206	424.573	1	431	4	4066
cluster_common_genes	Cluster_phosphatase_activity_GO	0.941818	0.303154	0.361339	1106.64	356.206	424.573	1	431	4	4066
cluster_common_genes	Cluster_deadenylation-dependent_decapping_of_nuclear-transcribed_mRNA_GO	0.941818	0.303154	0.361339	1106.64	356.206	424.573	1	431	4	4066
cluster_common_genes	Cluster_plasmid_maintenance_GO	0.941818	0.303154	0.361339	1106.64	356.206	424.573	1	431	4	4066
cluster_common_genes	Cluster_phosphatidylcholine_biosynthetic_process_GO	0.941818	0.303154	0.361339	1106.64	356.206	424.573	1	431	4	4066
cluster_common_genes	Cluster_cellular_bud_neck_contractile_ring_GO	0.941818	0.303154	0.361339	1106.64	356.206	424.573	1	431	4	4066
cluster_common_genes	Cluster_budding_cell_apical_bud_growth_GO	0.941818	0.303154	0.361339	1106.64	356.206	424.573	1	431	4	4066
cluster_common_genes	Cluster_RNA_polymerase_II_transcription_mediator_activity_GO	0.873614	0.242215	0.368601	1026.5	284.603	433.106	2	431	12	4066
cluster_common_genes	Cluster_nuclear_pore_organization_GO	0.873614	0.242215	0.368601	1026.5	284.603	433.106	2	431	12	4066
cluster_common_genes	Cluster_reciprocal_meiotic_recombination_GO	0.873614	0.242215	0.368601	1026.5	284.603	433.106	2	431	12	4066
cluster_common_genes	Cluster_ubiquitin-protein_ligase_activity_GO	0.823767	0.211338	0.387571	967.926	248.322	455.396	3	431	21	4066
cluster_common_genes	Cluster_response_to_drug_GO	0.793362	0.188549	0.395187	932.2	221.545	464.345	4	431	30	4066
cluster_common_genes	Cluster_protein_binding_GO	0.747054	0.147649	0.400595	877.788	173.488	470.699	7	431	57	4066
cluster_common_genes	Cluster_double-strand_break_repair_via_nonhomologous_end_joining_GO	0.847982	0.255962	0.40798	996.379	300.755	479.377	2	431	13	4066
cluster_common_genes	Cluster_exonuclease_activity_GO	0.847982	0.255962	0.40798	996.379	300.755	479.377	2	431	13	4066
cluster_common_genes	Cluster_transmembrane_transport_GO	0.847982	0.255962	0.40798	996.379	300.755	479.377	2	431	13	4066
cluster_common_genes	Cluster_steroid_biosynthetic_process_GO	0.847982	0.255962	0.40798	996.379	300.755	479.377	2	431	13	4066
cluster_common_genes	Cluster_reproduction_GO	0.847982	0.255962	0.40798	996.379	300.755	479.377	2	431	13	4066
cluster_common_genes	Cluster_mitochondrion_organization_GO	0.847982	0.255962	0.40798	996.379	300.755	479.377	2	431	13	4066
cluster_common_genes	Cluster_mitotic_sister_chromatid_cohesion_GO	0.847982	0.255962	0.40798	996.379	300.755	479.377	2	431	13	4066
cluster_common_genes	Cluster_transferase_activity_GO	0.688059	0.10203	0.413971	808.469	119.885	486.416	16	431	140	4066
cluster_common_genes	Cluster_Sterols_APGcategory	0.801406	0.218815	0.417409	941.652	257.108	490.456	3	431	22	4066
cluster_common_genes	Cluster_Vacuole_APGcategory	0.741366	0.161288	0.419922	871.105	189.513	493.408	6	431	49	4066
cluster_common_genes	Cluster_nucleosome_disassembly_GO	0.909726	0.338828	0.429102	1068.93	398.123	504.195	1	431	5	4066
cluster_common_genes	Cluster_large_ribosomal_subunit_GO	0.909726	0.338828	0.429102	1068.93	398.123	504.195	1	431	5	4066
cluster_common_genes	Cluster_endodeoyribonuclease_activity_GO	0.909726	0.338828	0.429102	1068.93	398.123	504.195	1	431	5	4066
cluster_common_genes	Cluster_cytoskeletal_protein_binding_GO	0.909726	0.338828	0.429102	1068.93	398.123	504.195	1	431	5	4066
cluster_common_genes	Cluster_mitochondrial_outer_membrane_translocase_complex_GO	0.909726	0.338828	0.429102	1068.93	398.123	504.195	1	431	5	4066
cluster_common_genes	Cluster_nucleotide_metabolic_process_GO	0.909726	0.338828	0.429102	1068.93	398.123	504.195	1	431	5	4066
cluster_common_genes	Cluster_fungal-type_cell_wall_organization_GO	0.909726	0.338828	0.429102	1068.93	398.123	504.195	1	431	5	4066
cluster_common_genes	Cluster_mRNA_cleavage_factor_complex_GO	0.909726	0.338828	0.429102	1068.93	398.123	504.195	1	431	5	4066
cluster_common_genes	Cluster_ubiquitin_ligase_complex_GO	0.909726	0.338828	0.429102	1068.93	398.123	504.195	1	431	5	4066
cluster_common_genes	Cluster_ascospore_wall_assembly_GO	0.909726	0.338828	0.429102	1068.93	398.123	504.195	1	431	5	4066
cluster_common_genes	Cluster_NuA4_histone_acetyltransferase_complex_GO	0.909726	0.338828	0.429102	1068.93	398.123	504.195	1	431	5	4066
cluster_common_genes	Cluster_amino_acid_metabolic_process_GO	0.909726	0.338828	0.429102	1068.93	398.123	504.195	1	431	5	4066
cluster_common_genes	Cluster_nucleoplasm_GO	0.909726	0.338828	0.429102	1068.93	398.123	504.195	1	431	5	4066
cluster_common_genes	Cluster_P-P-bond-hydrolysis-driven_protein_transmembrane_transporter_activity_GO	0.909726	0.338828	0.429102	1068.93	398.123	504.195	1	431	5	4066
cluster_common_genes	Cluster_cation_transport_GO	0.909726	0.338828	0.429102	1068.93	398.123	504.195	1	431	5	4066
cluster_common_genes	Cluster_cyclin-dependent_protein_kinase_holoenzyme_complex_GO	0.909726	0.338828	0.429102	1068.93	398.123	504.195	1	431	5	4066
cluster_common_genes	Cluster_establishment_of_mitotic_spindle_orientation_GO	0.909726	0.338828	0.429102	1068.93	398.123	504.195	1	431	5	4066
cluster_common_genes	Cluster_nucleobase,_nucleoside,_nucleotide_and_nucleic_acid_transport"_GO	0.909726	0.338828	0.429102	1068.93	398.123	504.195	1	431	5	4066
cluster_common_genes	Cluster_Rho_protein_signal_transduction_GO	0.909726	0.338828	0.429102	1068.93	398.123	504.195	1	431	5	4066
cluster_common_genes	Cluster_pre-replicative_complex_GO	0.909726	0.338828	0.429102	1068.93	398.123	504.195	1	431	5	4066
cluster_common_genes	Cluster_deoxyribonucleotide_biosynthetic_process_GO	0.909726	0.338828	0.429102	1068.93	398.123	504.195	1	431	5	4066
cluster_common_genes	Cluster_S_phase_of_mitotic_cell_cycle_GO	0.909726	0.338828	0.429102	1068.93	398.123	504.195	1	431	5	4066
cluster_common_genes	Cluster_ATP-dependent_DNA_helicase_activity_GO	0.909726	0.338828	0.429102	1068.93	398.123	504.195	1	431	5	4066
cluster_common_genes	Cluster_cell_wall_chitin_biosynthetic_process_GO	0.909726	0.338828	0.429102	1068.93	398.123	504.195	1	431	5	4066
cluster_common_genes	Cluster_nucleosome_GO	0.909726	0.338828	0.429102	1068.93	398.123	504.195	1	431	5	4066
cluster_common_genes	Cluster_cellular_calcium_ion_homeostasis_GO	0.909726	0.338828	0.429102	1068.93	398.123	504.195	1	431	5	4066
cluster_common_genes	Cluster_pre-replicative_complex_assembly_GO	0.909726	0.338828	0.429102	1068.93	398.123	504.195	1	431	5	4066
cluster_common_genes	Cluster_transcription-coupled_nucleotide-excision_repair_GO	0.909726	0.338828	0.429102	1068.93	398.123	504.195	1	431	5	4066
cluster_common_genes	Cluster_protein_monoubiquitination_GO	0.909726	0.338828	0.429102	1068.93	398.123	504.195	1	431	5	4066
cluster_common_genes	Cluster_vacuole_GO	0.736159	0.178503	0.442344	864.987	209.741	519.754	5	431	41	4066
cluster_common_genes	Cluster_magnesium_ion_binding_GO	0.736159	0.178503	0.442344	864.987	209.741	519.754	5	431	41	4066
cluster_common_genes	Cluster_vacuole_fusion,_non-autophagic"_GO	0.820889	0.267014	0.446124	964.545	313.741	524.196	2	431	14	4066
cluster_common_genes	Cluster_peroxisome_organization_GO	0.820889	0.267014	0.446124	964.545	313.741	524.196	2	431	14	4066
cluster_common_genes	Cluster_transcription_from_RNA_polymerase_I_promoter_GO	0.820889	0.267014	0.446124	964.545	313.741	524.196	2	431	14	4066
cluster_common_genes	Cluster_DNA-directed_RNA_polymerase_activity_GO	0.820889	0.267014	0.446124	964.545	313.741	524.196	2	431	14	4066
cluster_common_genes	Cluster_protein_import_into_mitochondrial_matri_GO	0.820889	0.267014	0.446124	964.545	313.741	524.196	2	431	14	4066
cluster_common_genes	Cluster_cell_morphogenesis_GO	0.820889	0.267014	0.446124	964.545	313.741	524.196	2	431	14	4066
cluster_common_genes	Cluster_transcription_from_RNA_polymerase_II_promoter_GO	0.778247	0.225005	0.446758	914.44	264.381	524.941	3	431	23	4066
cluster_common_genes	Cluster_positive_regulation_of_transcription_from_RNA_polymerase_II_promoter_GO	0.778247	0.225005	0.446758	914.44	264.381	524.941	3	431	23	4066
cluster_common_genes	Cluster_ER_to_Golgi_vesicle-mediated_transport_GO	0.778247	0.225005	0.446758	914.44	264.381	524.941	3	431	23	4066
cluster_common_genes	Cluster_RNAPol_APGcategory	0.717266	0.181179	0.463913	842.788	212.885	545.098	5	431	42	4066
cluster_common_genes	Cluster_RNA_splicing_GO	0.73199	0.20128	0.46929	860.088	236.504	551.416	4	431	33	4066
cluster_common_genes	Cluster_isomerase_activity_GO	0.754428	0.229926	0.475499	886.453	270.163	558.711	3	431	24	4066
cluster_common_genes	Cluster_endonuclease_activity_GO	0.79262	0.275474	0.482854	931.328	323.682	567.353	2	431	15	4066
cluster_common_genes	Cluster_aerobic_respiration_GO	0.79262	0.275474	0.482854	931.328	323.682	567.353	2	431	15	4066
cluster_common_genes	Cluster_chromatin_silencing_at_telomere_GO	0.79262	0.275474	0.482854	931.328	323.682	567.353	2	431	15	4066
cluster_common_genes	Cluster_sterol_biosynthetic_process_GO	0.79262	0.275474	0.482854	931.328	323.682	567.353	2	431	15	4066
cluster_common_genes	Cluster_endopeptidase_activity_GO	0.79262	0.275474	0.482854	931.328	323.682	567.353	2	431	15	4066
cluster_common_genes	Cluster_chromatin_remodeling_GO	0.79262	0.275474	0.482854	931.328	323.682	567.353	2	431	15	4066
cluster_common_genes	Cluster_transcription_corepressor_activity_GO	0.873849	0.363541	0.489692	1026.77	427.161	575.388	1	431	6	4066
cluster_common_genes	Cluster_regulation_of_cyclin-dependent_protein_kinase_activity_GO	0.873849	0.363541	0.489692	1026.77	427.161	575.388	1	431	6	4066
cluster_common_genes	Cluster_chromatin_silencing_GO	0.873849	0.363541	0.489692	1026.77	427.161	575.388	1	431	6	4066
cluster_common_genes	Cluster_snRNP_U5_GO	0.873849	0.363541	0.489692	1026.77	427.161	575.388	1	431	6	4066
cluster_common_genes	Cluster_presequence_translocase-associated_import_motor_GO	0.873849	0.363541	0.489692	1026.77	427.161	575.388	1	431	6	4066
cluster_common_genes	Cluster_regulation_of_translational_initiation_GO	0.873849	0.363541	0.489692	1026.77	427.161	575.388	1	431	6	4066
cluster_common_genes	Cluster_chaperone_binding_GO	0.873849	0.363541	0.489692	1026.77	427.161	575.388	1	431	6	4066
cluster_common_genes	Cluster_aminopeptidase_activity_GO	0.873849	0.363541	0.489692	1026.77	427.161	575.388	1	431	6	4066
cluster_common_genes	Cluster_cellular_ion_homeostasis_GO	0.873849	0.363541	0.489692	1026.77	427.161	575.388	1	431	6	4066
cluster_common_genes	Cluster_heat_shock_protein_binding_GO	0.873849	0.363541	0.489692	1026.77	427.161	575.388	1	431	6	4066
cluster_common_genes	Cluster_amino_acid_transport_GO	0.873849	0.363541	0.489692	1026.77	427.161	575.388	1	431	6	4066
cluster_common_genes	Cluster_glucose_metabolic_process_GO	0.873849	0.363541	0.489692	1026.77	427.161	575.388	1	431	6	4066
cluster_common_genes	Cluster_septin_ring_assembly_GO	0.873849	0.363541	0.489692	1026.77	427.161	575.388	1	431	6	4066
cluster_common_genes	Cluster_response_to_starvation_GO	0.873849	0.363541	0.489692	1026.77	427.161	575.388	1	431	6	4066
cluster_common_genes	Cluster_stress_granule_GO	0.873849	0.363541	0.489692	1026.77	427.161	575.388	1	431	6	4066
cluster_common_genes	Cluster_transferase_activity,_transferring_heosyl_groups"_GO	0.873849	0.363541	0.489692	1026.77	427.161	575.388	1	431	6	4066
cluster_common_genes	Cluster_protein_dimerization_activity_GO	0.873849	0.363541	0.489692	1026.77	427.161	575.388	1	431	6	4066
cluster_common_genes	Cluster_Glycogen_APGcategory	0.873849	0.363541	0.489692	1026.77	427.161	575.388	1	431	6	4066
cluster_common_genes	Cluster_Srb-mediator_complex_GO	0.873849	0.363541	0.489692	1026.77	427.161	575.388	1	431	6	4066
cluster_common_genes	Cluster_protein_polyubiquitination_GO	0.873849	0.363541	0.489692	1026.77	427.161	575.388	1	431	6	4066
cluster_common_genes	Cluster_eonucleolytic_trimming_to_generate_mature_3'-end_of_5.8S_rRNA_from_tricistronic_rRNA_transcript_(SSU-rRNA,_5.8S_rRNA,_LSU-rRNA)"_GO	0.873849	0.363541	0.489692	1026.77	427.161	575.388	1	431	6	4066
cluster_common_genes	Cluster_Proteasome_APGcategory	0.730081	0.233614	0.503532	857.845	274.496	591.65	3	431	25	4066
cluster_common_genes	Cluster_sporulation_resulting_in_formation_of_a_cellular_spore_GO	0.730081	0.233614	0.503532	857.845	274.496	591.65	3	431	25	4066
cluster_common_genes	Cluster_peptidase_activity_GO	0.689078	0.205895	0.516817	809.667	241.927	607.26	4	431	35	4066
cluster_common_genes	Cluster_nuclear_chromatin_GO	0.763447	0.281487	0.51804	897.05	330.747	608.697	2	431	16	4066
cluster_common_genes	Cluster_transcription_initiation_from_RNA_polymerase_II_promoter_GO	0.763447	0.281487	0.51804	897.05	330.747	608.697	2	431	16	4066
cluster_common_genes	Cluster_fungal-type_vacuole_GO	0.705338	0.236115	0.530776	828.772	277.435	623.662	3	431	26	4066
cluster_common_genes	Cluster_Spellman_G1_peak	0.559147	0.0940246	0.534877	656.998	110.479	628.48	21	431	198	4066
cluster_common_genes	Cluster_Rpd3/Clr6_histone_deacetylase_complex_I/I'_GO	0.835346	0.379211	0.543865	981.532	445.573	639.041	1	431	7	4066
cluster_common_genes	Cluster_double-stranded_DNA_binding_GO	0.835346	0.379211	0.543865	981.532	445.573	639.041	1	431	7	4066
cluster_common_genes	Cluster_apoptosis_GO	0.835346	0.379211	0.543865	981.532	445.573	639.041	1	431	7	4066
cluster_common_genes	Cluster_double-strand_break_repair_via_homologous_recombination_GO	0.835346	0.379211	0.543865	981.532	445.573	639.041	1	431	7	4066
cluster_common_genes	Cluster_protein_ubiquitination_during_ubiquitin-dependent_protein_catabolic_process_GO	0.835346	0.379211	0.543865	981.532	445.573	639.041	1	431	7	4066
cluster_common_genes	Cluster_axial_cellular_bud_site_selection_GO	0.835346	0.379211	0.543865	981.532	445.573	639.041	1	431	7	4066
cluster_common_genes	Cluster_sphingolipid_biosynthetic_process_GO	0.835346	0.379211	0.543865	981.532	445.573	639.041	1	431	7	4066
cluster_common_genes	Cluster_PentosePhosphate_APGcategory	0.835346	0.379211	0.543865	981.532	445.573	639.041	1	431	7	4066
cluster_common_genes	Cluster_proteasome_storage_granule_GO	0.835346	0.379211	0.543865	981.532	445.573	639.041	1	431	7	4066
cluster_common_genes	Cluster_aminoacyl-tRNA_ligase_activity_GO	0.835346	0.379211	0.543865	981.532	445.573	639.041	1	431	7	4066
cluster_common_genes	Cluster_Histidine_APGcategory	0.835346	0.379211	0.543865	981.532	445.573	639.041	1	431	7	4066
cluster_common_genes	Cluster_mRNA_cleavage_GO	0.835346	0.379211	0.543865	981.532	445.573	639.041	1	431	7	4066
cluster_common_genes	Cluster_SLIK_(SAGA-like)_complex_GO	0.835346	0.379211	0.543865	981.532	445.573	639.041	1	431	7	4066
cluster_common_genes	Cluster_transferase_activity,_transferring_glycosyl_groups"_GO	0.73363	0.285226	0.551596	862.015	335.141	648.125	2	431	17	4066
cluster_common_genes	Cluster_intracellular_protein_transmembrane_transport_GO	0.680324	0.237488	0.557164	799.381	279.048	654.668	3	431	27	4066
cluster_common_genes	Cluster_cytoskeleton_GO	0.680324	0.237488	0.557164	799.381	279.048	654.668	3	431	27	4066
cluster_common_genes	Cluster_meiosis_GO	0.645325	0.207595	0.56227	758.257	243.924	660.667	4	431	37	4066
cluster_common_genes	Cluster_invasive_growth_in_response_to_glucose_limitation_GO	0.70341	0.286882	0.583472	826.507	337.086	685.58	2	431	18	4066
cluster_common_genes	Cluster_nucleotidyltransferase_activity_GO	0.70341	0.286882	0.583472	826.507	337.086	685.58	2	431	18	4066
cluster_common_genes	Cluster_mRNA_processing_GO	0.599827	0.186276	0.586449	704.797	218.874	689.078	5	431	48	4066
cluster_common_genes	Cluster_transcription_factor_complex_GO	0.795173	0.387473	0.592299	934.328	455.281	695.951	1	431	8	4066
cluster_common_genes	Cluster_damaged_DNA_binding_GO	0.795173	0.387473	0.592299	934.328	455.281	695.951	1	431	8	4066
cluster_common_genes	Cluster_biosynthetic_process_GO	0.795173	0.387473	0.592299	934.328	455.281	695.951	1	431	8	4066
cluster_common_genes	Cluster_DNA_replication_initiation_GO	0.795173	0.387473	0.592299	934.328	455.281	695.951	1	431	8	4066
cluster_common_genes	Cluster_lipid_particle_GO	0.795173	0.387473	0.592299	934.328	455.281	695.951	1	431	8	4066
cluster_common_genes	Cluster_Golgi_to_plasma_membrane_transport_GO	0.795173	0.387473	0.592299	934.328	455.281	695.951	1	431	8	4066
cluster_common_genes	Cluster_vacuolar_transport_GO	0.795173	0.387473	0.592299	934.328	455.281	695.951	1	431	8	4066
cluster_common_genes	Cluster_retrograde_transport,_endosome_to_Golgi"_GO	0.795173	0.387473	0.592299	934.328	455.281	695.951	1	431	8	4066
cluster_common_genes	Cluster_proteasome_regulatory_particle,_base_subcomplex"_GO	0.795173	0.387473	0.592299	934.328	455.281	695.951	1	431	8	4066
cluster_common_genes	Cluster_SAGA_complex_GO	0.795173	0.387473	0.592299	934.328	455.281	695.951	1	431	8	4066
cluster_common_genes	Cluster_heme_binding_GO	0.795173	0.387473	0.592299	934.328	455.281	695.951	1	431	8	4066
cluster_common_genes	Cluster_proteasomal_ubiquitin-dependent_protein_catabolic_process_GO	0.795173	0.387473	0.592299	934.328	455.281	695.951	1	431	8	4066
cluster_common_genes	Cluster_Swr1_complex_GO	0.795173	0.387473	0.592299	934.328	455.281	695.951	1	431	8	4066
cluster_common_genes	Cluster_fatty_acid_metabolic_process_GO	0.795173	0.387473	0.592299	934.328	455.281	695.951	1	431	8	4066
cluster_common_genes	Cluster_Thiamine_APGcategory	0.795173	0.387473	0.592299	934.328	455.281	695.951	1	431	8	4066
cluster_common_genes	Cluster_peptidyl-amino_acid_modification_GO	0.629953	0.237126	0.607173	740.195	278.623	713.428	3	431	29	4066
cluster_common_genes	Cluster_tRNA_processing_GO	0.673007	0.286653	0.613646	790.783	336.817	721.034	2	431	19	4066
cluster_common_genes	Cluster_oxidoreductase_activity_GO	0.560411	0.184203	0.623792	658.483	216.439	732.956	5	431	50	4066
cluster_common_genes	Cluster_DNA_replication_GO	0.579425	0.205247	0.625823	680.824	241.165	735.342	4	431	40	4066
cluster_common_genes	Cluster_Phospholipid_APGcategory	0.604813	0.23554	0.630727	710.655	276.76	741.104	3	431	30	4066
cluster_common_genes	Cluster_Rpd3L-Epanded_complex_GO	0.754115	0.389717	0.635601	886.085	457.917	746.831	1	431	9	4066
cluster_common_genes	Cluster_mitochondrial_large_ribosomal_subunit_GO	0.754115	0.389717	0.635601	886.085	457.917	746.831	1	431	9	4066
cluster_common_genes	Cluster_anchored_to_membrane_GO	0.754115	0.389717	0.635601	886.085	457.917	746.831	1	431	9	4066
cluster_common_genes	Cluster_chromosome,_centromeric_region"_GO	0.754115	0.389717	0.635601	886.085	457.917	746.831	1	431	9	4066
cluster_common_genes	Cluster_phosphorus_metabolic_process_GO	0.754115	0.389717	0.635601	886.085	457.917	746.831	1	431	9	4066
cluster_common_genes	Cluster_DNA_replication_preinitiation_complex_GO	0.754115	0.389717	0.635601	886.085	457.917	746.831	1	431	9	4066
cluster_common_genes	Cluster_protein_complex_assembly_GO	0.64262	0.28474	0.64212	755.078	334.57	754.491	2	431	20	4066
cluster_common_genes	Cluster_Mating_APGcategory	0.64262	0.28474	0.64212	755.078	334.57	754.491	2	431	20	4066
cluster_common_genes	Cluster_lipid_biosynthetic_process_GO	0.612429	0.281344	0.668915	719.604	330.579	785.975	2	431	21	4066
cluster_common_genes	Cluster_rRNA_metabolic_process_GO	0.492066	0.163325	0.671259	578.178	191.907	788.729	6	431	63	4066
cluster_common_genes	Cluster_FAD_binding_GO	0.712809	0.387123	0.674314	837.551	454.87	792.319	1	431	10	4066
cluster_common_genes	Cluster_mitochondrial_intermembrane_space_GO	0.712809	0.387123	0.674314	837.551	454.87	792.319	1	431	10	4066
cluster_common_genes	Cluster_RNA_elongation_GO	0.712809	0.387123	0.674314	837.551	454.87	792.319	1	431	10	4066
cluster_common_genes	Cluster_DNA-dependent_DNA_replication_GO	0.712809	0.387123	0.674314	837.551	454.87	792.319	1	431	10	4066
cluster_common_genes	Cluster_intra-Golgi_vesicle-mediated_transport_GO	0.712809	0.387123	0.674314	837.551	454.87	792.319	1	431	10	4066
cluster_common_genes	Cluster_mediator_complex_GO	0.712809	0.387123	0.674314	837.551	454.87	792.319	1	431	10	4066
cluster_common_genes	Cluster_cellular_aromatic_compound_metabolic_process_GO	0.712809	0.387123	0.674314	837.551	454.87	792.319	1	431	10	4066
cluster_common_genes	Cluster_ubiquitin-dependent_protein_catabolic_process_via_the_multivesicular_body_sorting_pathway_GO	0.712809	0.387123	0.674314	837.551	454.87	792.319	1	431	10	4066
cluster_common_genes	Cluster_hydrolase_activity,_acting_on_glycosyl_bonds"_GO	0.712809	0.387123	0.674314	837.551	454.87	792.319	1	431	10	4066
cluster_common_genes	Cluster_lyase_activity_GO	0.582591	0.276656	0.694065	684.544	325.071	815.526	2	431	22	4066
cluster_common_genes	Cluster_endosome_membrane_GO	0.582591	0.276656	0.694065	684.544	325.071	815.526	2	431	22	4066
cluster_common_genes	Cluster_molecular_function_GO	0.382051	0.0831227	0.701071	448.91	97.6692	823.758	22	431	226	4066
cluster_common_genes	Cluster_oxidation_reduction_GO	0.464783	0.17259	0.707807	546.12	202.793	831.673	5	431	55	4066
cluster_common_genes	Cluster_bipolar_cellular_bud_site_selection_GO	0.671768	0.38069	0.708922	789.327	447.311	832.983	1	431	11	4066
cluster_common_genes	Cluster_peripheral_to_membrane_of_membrane_fraction_GO	0.671768	0.38069	0.708922	789.327	447.311	832.983	1	431	11	4066
cluster_common_genes	Cluster_pyridoal_phosphate_binding_GO	0.671768	0.38069	0.708922	789.327	447.311	832.983	1	431	11	4066
cluster_common_genes	Cluster_transcription_factor_TFIID_complex_GO	0.671768	0.38069	0.708922	789.327	447.311	832.983	1	431	11	4066
cluster_common_genes	Cluster_vesicle_fusion_GO	0.671768	0.38069	0.708922	789.327	447.311	832.983	1	431	11	4066
cluster_common_genes	Cluster_tRNA_metabolic_process_GO	0.671768	0.38069	0.708922	789.327	447.311	832.983	1	431	11	4066
cluster_common_genes	Cluster_condensed_chromosome_kinetochore_GO	0.671768	0.38069	0.708922	789.327	447.311	832.983	1	431	11	4066
cluster_common_genes	Cluster_mitochondrial_membrane_GO	0.671768	0.38069	0.708922	789.327	447.311	832.983	1	431	11	4066
cluster_common_genes	Cluster_mitochondrial_matri_GO	0.506714	0.221674	0.71496	595.389	260.467	840.078	3	431	34	4066
cluster_common_genes	Cluster_vesicle-mediated_transport_GO	0.473092	0.190969	0.717877	555.883	224.389	843.505	4	431	45	4066
cluster_common_genes	Cluster_piecemeal_microautophagy_of_nucleus_GO	0.524501	0.26413	0.739629	616.289	310.353	869.064	2	431	24	4066
cluster_common_genes	Cluster_Endocytosis_APGcategory	0.631399	0.371259	0.73986	741.894	436.229	869.336	1	431	12	4066
cluster_common_genes	Cluster_ergosterol_biosynthetic_process_GO	0.631399	0.371259	0.73986	741.894	436.229	869.336	1	431	12	4066
cluster_common_genes	Cluster_establishment_or_maintenance_of_chromatin_architecture_GO	0.631399	0.371259	0.73986	741.894	436.229	869.336	1	431	12	4066
cluster_common_genes	Cluster_transporter_activity_GO	0.631399	0.371259	0.73986	741.894	436.229	869.336	1	431	12	4066
cluster_common_genes	Cluster_Golgi_to_vacuole_transport_GO	0.631399	0.371259	0.73986	741.894	436.229	869.336	1	431	12	4066
cluster_common_genes	Cluster_phospholipid_biosynthetic_process_GO	0.631399	0.371259	0.73986	741.894	436.229	869.336	1	431	12	4066
cluster_common_genes	Cluster_RNA_processing_GO	0.59202	0.359537	0.767517	695.624	422.456	901.832	1	431	13	4066
cluster_common_genes	Cluster_metallopeptidase_activity_GO	0.59202	0.359537	0.767517	695.624	422.456	901.832	1	431	13	4066
cluster_common_genes	Cluster_RNA_polymerase_II_transcription_factor_activity_GO	0.59202	0.359537	0.767517	695.624	422.456	901.832	1	431	13	4066
cluster_common_genes	Cluster_mitochondrial_translation_GO	0.59202	0.359537	0.767517	695.624	422.456	901.832	1	431	13	4066
cluster_common_genes	Cluster_mitochondrial_genome_maintenance_GO	0.59202	0.359537	0.767517	695.624	422.456	901.832	1	431	13	4066
cluster_common_genes	Cluster_pre-autophagosomal_structure_GO	0.553876	0.346115	0.792239	650.804	406.685	930.881	1	431	14	4066
cluster_common_genes	Cluster_phosphoinositide_binding_GO	0.553876	0.346115	0.792239	650.804	406.685	930.881	1	431	14	4066
cluster_common_genes	Cluster_chromatin_binding_GO	0.553876	0.346115	0.792239	650.804	406.685	930.881	1	431	14	4066
cluster_common_genes	Cluster_ER-associated_protein_catabolic_process_GO	0.553876	0.346115	0.792239	650.804	406.685	930.881	1	431	14	4066
cluster_common_genes	Cluster_FattyAcid_APGcategory	0.442836	0.239879	0.797043	520.332	281.858	936.526	2	431	27	4066
cluster_common_genes	Cluster_ligase_activity_GO	0.442836	0.239879	0.797043	520.332	281.858	936.526	2	431	27	4066
cluster_common_genes	Cluster_CVT_pathway_GO	0.517146	0.331484	0.814338	607.647	389.494	956.847	1	431	15	4066
cluster_common_genes	Cluster_electron_carrier_activity_GO	0.517146	0.331484	0.814338	607.647	389.494	956.847	1	431	15	4066
cluster_common_genes	Cluster_response_to_oxidative_stress_GO	0.517146	0.331484	0.814338	607.647	389.494	956.847	1	431	15	4066
cluster_common_genes	Cluster_transcription_from_RNA_polymerase_III_promoter_GO	0.517146	0.331484	0.814338	607.647	389.494	956.847	1	431	15	4066
cluster_common_genes	Cluster_catalytic_activity_GO	0.288006	0.103494	0.815489	338.407	121.605	958.2	9	431	107	4066
cluster_common_genes	Cluster_ubiquitin-dependent_protein_catabolic_process_GO	0.31364	0.137552	0.823913	368.527	161.624	968.098	5	431	64	4066
cluster_common_genes	Cluster_chromatin_modification_GO	0.354342	0.179912	0.825571	416.352	211.397	970.046	3	431	41	4066
cluster_common_genes	Cluster_nuclear_mRNA_splicing,_via_spliceosome"_GO	0.392827	0.221649	0.828822	461.572	260.438	973.866	2	431	29	4066
cluster_common_genes	Cluster_amino_acid_biosynthetic_process_GO	0.48196	0.316051	0.834091	566.303	371.36	980.057	1	431	16	4066
cluster_common_genes	Cluster_methyltransferase_activity_GO	0.48196	0.316051	0.834091	566.303	371.36	980.057	1	431	16	4066
cluster_common_genes	Cluster_cytoplasmic_vesicle_GO	0.48196	0.316051	0.834091	566.303	371.36	980.057	1	431	16	4066
cluster_common_genes	Cluster_Peroxisome_APGcategory	0.48196	0.316051	0.834091	566.303	371.36	980.057	1	431	16	4066
cluster_common_genes	Cluster_biological_process_GO	0.292193	0.142062	0.849868	343.327	166.923	998.595	4	431	55	4066
cluster_common_genes	Cluster_response_to_osmotic_stress_GO	0.448404	0.300151	0.851747	526.875	352.677	1000.8	1	431	17	4066
cluster_common_genes	Cluster_metabolic_process_GO	0.252597	0.11051	0.857914	296.801	129.849	1008.05	6	431	79	4066
cluster_common_genes	Cluster_TATAcontaining_APGcategory	0.161951	0.0307331	0.868782	190.292	36.1114	1020.82	72	431	755	4066
cluster_common_genes	Cluster_Golgi_membrane_GO	0.304599	0.183877	0.879278	357.904	216.055	1033.15	2	431	33	4066
cluster_common_genes	Cluster_membrane_GO	0.149168	0.0403923	0.891224	175.272	47.461	1047.19	30	431	341	4066
cluster_common_genes	Cluster_Golgi_apparatus_GO	0.222215	0.115663	0.893448	261.103	135.904	1049.8	4	431	60	4066
cluster_common_genes	Cluster_protein_targeting_to_vacuole_GO	0.35788	0.252119	0.894239	420.509	296.24	1050.73	1	431	20	4066
cluster_common_genes	Cluster_cellular_component_GO	0.266464	0.165467	0.899003	313.095	194.424	1056.33	2	431	35	4066
cluster_common_genes	Cluster_integral_to_membrane_GO	0.142863	0.0498656	0.907003	167.864	58.5921	1065.73	16	431	198	4066
cluster_common_genes	Cluster_cellular_response_to_heat_GO	0.248854	0.156555	0.9077	292.403	183.952	1066.55	2	431	36	4066
cluster_common_genes	Cluster_tRNAsynth_APGcategory	0.282382	0.206953	0.924572	331.799	243.17	1086.37	1	431	23	4066
cluster_common_genes	Cluster_endoplasmic_reticulum_GO	0.138012	0.0654626	0.927451	162.164	76.9186	1089.75	7	431	102	4066
cluster_common_genes	Cluster_peroxisome_GO	0.260371	0.192983	0.932613	305.936	226.755	1095.82	1	431	24	4066
cluster_common_genes	Cluster_tRNAprocessing_APGcategory	0.239841	0.179639	0.939798	281.813	211.076	1104.26	1	431	25	4066
cluster_common_genes	Cluster_MitochondrialRPs_APGcategory	0.13958	0.0954555	0.955875	164.006	112.16	1123.15	2	431	44	4066
cluster_common_genes	Cluster_cellular_metabolic_compound_salvage_GO	0.157029	0.122785	0.965757	184.509	144.272	1134.76	1	431	30	4066
cluster_common_genes	Cluster_mitochondrial_inner_membrane_GO	0.102684	0.0724774	0.969794	120.654	85.1609	1139.51	2	431	48	4066
cluster_common_genes	Cluster_autophagy_GO	0.0744673	0.0492286	0.974761	87.4991	57.8436	1145.34	3	431	65	4066
cluster_common_genes	Cluster_iESR_APGcategory	0.0385198	0.0173785	0.978859	45.2608	20.4197	1150.16	14	431	206	4066
cluster_common_genes	Cluster_endosome_GO	0.0843059	0.0687827	0.984477	99.0594	80.8197	1156.76	1	431	37	4066
cluster_common_genes	Cluster_endoplasmic_reticulum_membrane_GO	0.0194428	0.0152144	0.995772	22.8453	17.8769	1170.03	2	431	68	4066
cluster_common_genes	Cluster_SGD-nonessentials_APGcategory	3.26727e-10	1.72334e-10	1	3.83904e-07	2.02492e-07	1175	298	431	3290	4066

## Sheet: Deleterious-WilcoxonFishers
Feature_BC187	BC187_Pval	BC187_Pval_BH_significant	Feature_DBVPG1373	DBVPG1373_Pval	DBVPG1373_Pval_BH_significant	Feature_YJM1389	YJM1389_Pval	YJM1389_Pval_BH_significant	Feature_YJM978	YJM978_Pval	YJM978_Pval_BH_significant	Feature_Y389	Y389_Pval	Y389_Pval_BH_significant	Feature_YJM1592	YJM1592_Pval	YJM1592_Pval_BH_significant	Feature_YPS128	YPS128_Pval	YPS128_Pval_BH_significant	Feature_YPS163	YPS163_Pval	YPS163_Pval_BH_significant	Feature_Y12	Y12_Pval	Y12_Pval_BH_significant	Feature_YJM1273	YJM1273_Pval	YJM1273_Pval_BH_significant	Feature_NCYC3290	NCYC3290_Pval	NCYC3290_Pval_BH_significant	Feature_Y2209	Y2209_Pval	Y2209_Pval_BH_significant	Feature_Y7568	Y7568_Pval	Y7568_Pval_BH_significant
GO:0044432 endoplasmic reticulum part	0.000998057	0	%AA_W	0.000118081	0	%AA_N	0.000274313	0	GO:0001300 chronological cell aging	0.00122389	0	GO:0000819 sister chromatid segregation	0.00106295	0	GO:0016050 vesicle organization	0.000785855	0	Num_SNPs	0.000870673	0	geneLen	4.73e-09	1	GO:0005759 mitochondrial matrix	0.000285075	0	geneLen	2.58e-10	1	%AA_R	0.000211444	0	GO:0016036 cellular response to phosphate starvation	8.67e-05	1	geneLen	2.94e-11	1
GO:0032991 macromolecular complex	0.0036012	0	GO:0043467 regulation of generation of precursor metabolites and energy	0.00105536	0	GC	0.00104948	0	GO:2000222 positive regulation of pseudohyphal growth	0.0017163	0	GO:0006281 DNA repair	0.00107791	0	GO:0007032 endosome organization	0.00234681	0	GO:0043167 ion binding	0.00137495	0	SNP-LOW	0.000132346	0	GO:0046982 protein heterodimerization activity	0.000873963	0	Num_SNPs	1.65e-06	1	GO:0006865 amino acid transport	0.000643704	0	GO:0031669 cellular response to nutrient levels	0.00173572	0	GO:0003700 transcription factor activity, sequence-specific DNA binding	0.000177463	0
GO:0005789 endoplasmic reticulum membrane	0.0049316	0	GO:0006163 purine nucleotide metabolic process	0.00372684	0	%AA_A	0.00112894	0	GO:0030307 positive regulation of cell growth	0.0017163	0	GO:0000280 nuclear division	0.00118045	0	%AA_K	0.00249594	0	SNP-LOW	0.00186338	0	GO:0000921 septin ring assembly	0.000369502	0	GO:0017111 nucleoside-triphosphatase activity	0.00127772	0	SNP-MODERATE	1.58e-05	1	GO:0005507 copper ion binding	0.00222967	0	GO:0031667 response to nutrient levels	0.00196996	0	GO:0044459 plasma membrane part	0.000177463	0
GO:0031907 microbody lumen	0.00595588	0	GO:0010604 positive regulation of macromolecule metabolic process	0.00403864	0	GO:0007049 cell cycle	0.00136401	0	GO:0070786 positive regulation of growth of unicellular organism as a thread of attached cells	0.00419701	0	GO:0006974 cellular response to DNA damage stimulus	0.00149567	0	GO:0005829 cytosol	0.00283284	0	GO:0070003 threonine-type peptidase activity	0.00267091	0	Num_SNPs	0.00040346	0	GO:0016818 hydrolase activity, acting on acid anhydrides, in phosphorus-containing anhydrides	0.00157535	0	Num_AAChanges	3.83e-05	1	GO:0042364 water-soluble vitamin biosynthetic process	0.00242552	0	GO:0009991 response to extracellular stimulus	0.00235701	0	GO:0003677 DNA binding	0.000462126	0
GO:0060188 regulation of protein desumoylation	0.00595588	0	%AA_L	0.00422445	0	GO:0022402 cell cycle process	0.00174127	0	GO:0090033 positive regulation of filamentous growth	0.00766363	0	GO:0000070 mitotic sister chromatid segregation	0.00190638	0	GO:0044445 cytosolic part	0.00576164	0	GO:0010499 proteasomal ubiquitin-independent protein catabolic process	0.00267091	0	physical_association	0.00109188	0	GO:0016462 pyrophosphatase activity	0.00157535	0	SNP-LOW	5.67e-05	1	GO:0009110 vitamin biosynthetic process	0.00242552	0	GO:0009605 response to external stimulus	0.00263962	0	GO:0003690 double-stranded DNA binding	0.000821927	0
GO:0005782 peroxisomal matrix	0.00595588	0	geneLen	0.00439338	0	GO:0051338 regulation of transferase activity	0.0024934	0	GO:1900430 positive regulation of filamentous growth of a population of unicellular organisms	0.00766363	0	GO:0048285 organelle fission	0.00238658	0	GO:0010256 endomembrane system organization	0.00742532	0	GO:0004298 threonine-type endopeptidase activity	0.00267091	0	GO:0048468 cell development	0.00151057	0	GO:0016817 hydrolase activity, acting on acid anhydrides	0.00157535	0	GC	0.000905201	0	GO:0006767 water-soluble vitamin metabolic process	0.00418901	0	GO:0005576 extracellular region	0.00294248	0	Num_SNPs	0.000913201	0
GO:0042175 nuclear outer membrane-endoplasmic reticulum membrane network	0.00640306	0	GO:0009150 purine ribonucleotide metabolic process	0.00554177	0	GO:0070011 peptidase activity, acting on L-amino acid peptides	0.00254389	0	GO:0045927 positive regulation of growth	0.00766363	0	GO:0050000 chromosome localization	0.00323194	0	GO:0034496 multivesicular body membrane disassembly	0.00840336	0	GO:0005488 binding	0.00384644	0	GO:0030437 ascospore formation	0.00151057	0	GO:0005657 replication fork	0.00166416	0	%AA_A	0.0009942	0	GO:0006766 vitamin metabolic process	0.00418901	0	GO:0009277 fungal-type cell wall	0.00379142	0	Num_AAChanges	0.00106094	0
geneLen	0.00893128	0	GO:0009893 positive regulation of metabolic process	0.00604734	0	GO:0000775 chromosome, centromeric region	0.00396535	0	GO:2000220 regulation of pseudohyphal growth	0.00766363	0	GO:0043596 nuclear replication fork	0.00335801	0	GO:0051569 regulation of histone H3-K4 methylation	0.00840336	0	GO:0005839 proteasome core complex	0.00413543	0	GO:0034293 sexual sporulation	0.00196485	0	GO:0032005 signal transduction involved in conjugation with cellular fusion	0.00255233	0	GO:0000384 first spliceosomal transesterification activity	0.00122816	0	GO:0015802 basic amino acid transport	0.00642659	0	GO:0030312 external encapsulating structure	0.00416891	0	SNP-MODERATE	0.0012403	0
GO:0017004 cytochrome complex assembly	0.00973607	0	GO:0031325 positive regulation of cellular metabolic process	0.00604734	0	GO:0000794 condensed nuclear chromosome	0.00396535	0	GO:0031970 organelle envelope lumen	0.00951034	0	GO:0006275 regulation of DNA replication	0.00335801	0	GO:0006660 phosphatidylserine catabolic process	0.00840336	0	GO:0043169 cation binding	0.00478515	0	GO:0043935 sexual sporulation resulting in formation of a cellular spore	0.00196485	0	GO:0000750 pheromone-dependent signal transduction involved in conjugation with cellular fusion	0.00255233	0	GO:0017004 cytochrome complex assembly	0.00155372	0	GO:0055070 copper ion homeostasis	0.00642659	0	GO:0005618 cell wall	0.00416891	0	GO:0001071 nucleic acid binding transcription factor activity	0.00139194	0
GO:0060589 nucleoside-triphosphatase regulator activity	0.0100072	0	GO:0007088 regulation of mitotic nuclear division	0.00662759	0	GO:0031399 regulation of protein modification process	0.0055704	0	GO:0005758 mitochondrial intermembrane space	0.00951034	0	GO:0004674 protein serine/threonine kinase activity	0.00398691	0	GO:0009257 10-formyltetrahydrofolate biosynthetic process	0.00840336	0	GO:0006658 phosphatidylserine metabolic process	0.00578193	0	GO:0006521 regulation of cellular amino acid metabolic process	0.0026801	0	GO:0043232 intracellular non-membrane-bounded organelle	0.00463146	0	GO:0044429 mitochondrial part	0.00517935	0	GO:0006878 cellular copper ion homeostasis	0.00642659	0	GO:0009267 cellular response to starvation	0.00469037	0	GO:0000978 RNA polymerase II core promoter proximal region sequence-specific DNA binding	0.00163026	0
GO:0016853 isomerase activity	0.0121979	0	GO:0072521 purine-containing compound metabolic process	0.00745791	0	GO:0004175 endopeptidase activity	0.00591158	0	GO:0001558 regulation of cell growth	0.0120486	0	GO:0006302 double-strand break repair	0.00458643	0	GO:0006438 valyl-tRNA aminoacylation	0.00840336	0	GO:0033588 Elongator holoenzyme complex	0.00578193	0	GO:0033238 regulation of cellular amine metabolic process	0.0026801	0	GO:0043228 non-membrane-bounded organelle	0.00463146	0	GO:0097034 mitochondrial respiratory chain complex IV biogenesis	0.00519243	0	GO:0008198 ferrous iron binding	0.00642659	0	GO:0006617 SRP-dependent cotranslational protein targeting to membrane, signal sequence recognition	0.00555942	0	GO:0043565 sequence-specific DNA binding	0.00163374	0
GO:0005758 mitochondrial intermembrane space	0.0124059	0	GO:0004659 prenyltransferase activity	0.00752502	0	GO:0008233 peptidase activity	0.00595692	0	GO:0007569 cell aging	0.0128925	0	GO:0007064 mitotic sister chromatid cohesion	0.00569925	0	GO:0032585 multivesicular body membrane	0.00840336	0	GO:0019773 proteasome core complex, alpha-subunit complex	0.00578193	0	GO:0022413 reproductive process in single-celled organism	0.00358052	0	GO:0032991 macromolecular complex	0.00475018	0	GO:0033262 regulation of nuclear cell cycle DNA replication	0.00661567	0	GO:0010876 lipid localization	0.00681319	0	GO:1900070 negative regulation of cellular hyperosmotic salinity response	0.00555942	0	GO:0000981 RNA polymerase II transcription factor activity, sequence-specific DNA binding	0.00220752	0
GO:0031970 organelle envelope lumen	0.0124059	0	GO:0009891 positive regulation of biosynthetic process	0.00857544	0	GO:0051301 cell division	0.00725703	0	GO:0019207 kinase regulator activity	0.0128925	0	GO:0016773 phosphotransferase activity, alcohol group as acceptor	0.00601739	0	GO:0005871 kinesin complex	0.00840336	0	GO:0004601 peroxidase activity	0.00600318	0	GO:0003006 developmental process involved in reproduction	0.00412099	0	GO:0004386 helicase activity	0.00485238	0	GO:0030663 COPI-coated vesicle membrane	0.00661567	0	GO:0006553 lysine metabolic process	0.0087773	0	GO:1900460 negative regulation of invasive growth in response to glucose limitation by negative regulation of transcription from RNA polymerase II promoter	0.00555942	0	GO:0006020 inositol metabolic process	0.00262315	0
GO:0034219 carbohydrate transmembrane transport	0.0126169	0	GO:0031328 positive regulation of cellular biosynthetic process	0.00857544	0	GO:0042592 homeostatic process	0.00779083	0	GO:0030234 enzyme regulator activity	0.0129469	0	GO:0000109 nucleotide-excision repair complex	0.00603507	0	GO:0033182 regulation of histone ubiquitination	0.00840336	0	GO:0016684 oxidoreductase activity, acting on peroxide as acceptor	0.00600318	0	GO:0031974 membrane-enclosed lumen	0.00423577	0	GO:0031974 membrane-enclosed lumen	0.00528493	0	GO:0048523 negative regulation of cellular process	0.00698052	0	GO:0015804 neutral amino acid transport	0.0087773	0	GO:1901000 regulation of response to salt stress	0.00555942	0	GO:1990837 sequence-specific double-stranded DNA binding	0.00420285	0
GO:0030234 enzyme regulator activity	0.014896	0	GO:0048522 positive regulation of cellular process	0.00883027	0	GO:0051174 regulation of phosphorus metabolic process	0.00839362	0	GO:0007568 aging	0.0141541	0	GO:0051303 establishment of chromosome localization	0.00603507	0	GO:0015680 intracellular copper ion transport	0.00840336	0	GO:0046872 metal ion binding	0.00707062	0	GO:0043233 organelle lumen	0.00423577	0	GO:0070013 intracellular organelle lumen	0.00528493	0	GO:0007005 mitochondrion organization	0.0072773	0	GO:0097035 regulation of membrane lipid distribution	0.0087773	0	GO:0052642 lysophosphatidic acid phosphatase activity	0.00555942	0	SNP-LOW	0.00464379	0
GO:0006461 protein complex assembly	0.0161268	0	GO:0009167 purine ribonucleoside monophosphate metabolic process	0.00900355	0	GO:0019220 regulation of phosphate metabolic process	0.00839362	0	GO:0070784 regulation of growth of unicellular organism as a thread of attached cells	0.0145654	0	GO:0016787 hydrolase activity	0.00663023	0	GO:0031062 positive regulation of histone methylation	0.00840336	0	geneLen	0.0073104	0	GO:0070013 intracellular organelle lumen	0.00423577	0	GO:0043233 organelle lumen	0.00528493	0	GO:0071012 catalytic step 1 spliceosome	0.00886285	0	GO:0015914 phospholipid transport	0.00909147	0	GO:1900464 negative regulation of cellular hyperosmotic salinity response by negative regulation of transcription from RNA polymerase II promoter	0.00555942	0	GO:0005886 plasma membrane	0.00508244	0
GO:0042357 thiamine diphosphate metabolic process	0.0169573	0	GO:0009126 purine nucleoside monophosphate metabolic process	0.00900355	0	GO:0043549 regulation of kinase activity	0.0101936	0	GO:0009056 catabolic process	0.0156006	0	GO:0022804 active transmembrane transporter activity	0.00679754	0	GO:0033184 positive regulation of histone ubiquitination	0.00840336	0	GO:0034515 proteasome storage granule	0.00830006	0	GO:0036094 small molecule binding	0.00429289	0	GO:0009277 fungal-type cell wall	0.0053373	0	GO:0071006 U2-type catalytic step 1 spliceosome	0.00886285	0	GO:0001315 age-dependent response to reactive oxygen species	0.00989869	0	GO:0090549 response to carbon starvation	0.00555942	0	GO:0008094 DNA-dependent ATPase activity	0.00521556	0
GO:0019239 deaminase activity	0.0169573	0	GO:0006397 mRNA processing	0.00901776	0	GO:0045859 regulation of protein kinase activity	0.0101936	0	GO:1901856 negative regulation of cellular respiration	0.0172956	0	GO:0004672 protein kinase activity	0.00679754	0	GO:0031060 regulation of histone methylation	0.00840336	0	GO:0046486 glycerolipid metabolic process	0.00866721	0	GO:0030154 cell differentiation	0.00662565	0	GO:0034641 cellular nitrogen compound metabolic process	0.00558266	0	GO:0033108 mitochondrial respiratory chain complex assembly	0.0121213	0	GO:0015819 lysine transport	0.00989869	0	GO:1900069 regulation of cellular hyperosmotic salinity response	0.00555942	0	GO:0001159 core promoter proximal region DNA binding	0.00521556	0
GO:0009229 thiamine diphosphate biosynthetic process	0.0169573	0	GO:0048518 positive regulation of biological process	0.00942331	0	GO:0034515 proteasome storage granule	0.010415	0	GO:2000906 positive regulation of starch metabolic process	0.0172956	0	GO:0006259 DNA metabolic process	0.00682546	0	GO:0030397 membrane disassembly	0.00840336	0	GO:0032878 regulation of establishment or maintenance of cell polarity	0.0112269	0	GO:0031399 regulation of protein modification process	0.00670449	0	GO:0000725 recombinational repair	0.00568727	0	GO:0000393 spliceosomal conformational changes to generate catalytic conformation	0.0145889	0	%AA_S	0.0146132	0	GO:1901001 negative regulation of response to salt stress	0.00555942	0	GO:0000982 transcription factor activity, RNA polymerase II core promoter proximal region sequence-specific binding	0.00521556	0
GO:0015976 carbon utilization	0.0169573	0	GO:0009199 ribonucleoside triphosphate metabolic process	0.00956379	0	GO:0006629 lipid metabolic process	0.0126917	0	GO:0008176 tRNA (guanine-N7-)-methyltransferase activity	0.0172956	0	GO:0043492 ATPase activity, coupled to movement of substances	0.00730398	0	GO:0016531 copper chaperone activity	0.00840336	0	GO:0004806 triglyceride lipase activity	0.0112269	0	GO:0051336 regulation of hydrolase activity	0.00687329	0	GO:0005618 cell wall	0.00648995	0	GO:0005740 mitochondrial envelope	0.0159243	0	GO:0071822 protein complex subunit organization	0.015174	0	GO:0042594 response to starvation	0.00572287	0	GO:0000987 core promoter proximal region sequence-specific DNA binding	0.00521556	0
GO:0044615 nuclear pore nuclear basket	0.0169573	0	GO:0009205 purine ribonucleoside triphosphate metabolic process	0.00956379	0	GO:0019953 sexual reproduction	0.0128217	0	GO:1900455 regulation of flocculation via cell wall protein-carbohydrate interaction	0.0172956	0	GO:0005657 replication fork	0.0074455	0	GO:0006437 tyrosyl-tRNA aminoacylation	0.00840336	0	GO:0046461 neutral lipid catabolic process	0.0112269	0	GO:0044703 multi-organism reproductive process	0.0072157	0	GO:0030312 external encapsulating structure	0.00648995	0	GO:0090329 regulation of DNA-dependent DNA replication	0.0169983	0	GO:0006869 lipid transport	0.0165233	0	GO:0031668 cellular response to extracellular stimulus	0.0107812	0	GO:0008026 ATP-dependent helicase activity	0.00632413	0
GO:0034456 UTP-C complex	0.0169573	0	GO:0009144 purine nucleoside triphosphate metabolic process	0.00956379	0	GO:0044703 multi-organism reproductive process	0.0128217	0	GO:1900735 positive regulation of flocculation	0.0172956	0	GO:0000112 nucleotide-excision repair factor 3 complex	0.00751867	0	GO:0004329 formate-tetrahydrofolate ligase activity	0.00840336	0	GO:0097159 organic cyclic compound binding	0.01411	0	GO:0019953 sexual reproduction	0.0072157	0	GO:0051646 mitochondrion localization	0.00688994	0	GO:0033617 mitochondrial respiratory chain complex IV assembly	0.0169983	0	%AA_W	0.0201629	0	GO:0071496 cellular response to external stimulus	0.0107812	0	GO:0070035 purine NTP-dependent helicase activity	0.00632413	0
GO:0000922 spindle pole	0.0190546	0	GO:0006164 purine nucleotide biosynthetic process	0.0133838	0	GO:0051704 multi-organism process	0.0131278	0	GO:0045027 DNA end binding	0.0172956	0	GO:0004864 protein phosphatase inhibitor activity	0.00751867	0	GO:0051571 positive regulation of histone H3-K4 methylation	0.00840336	0	GO:1901363 heterocyclic compound binding	0.0141661	0	GO:0006807 nitrogen compound metabolic process	0.00763473	0	GO:0044446 intracellular organelle part	0.00737609	0	GO:0000003 reproduction	0.0181339	0	GO:0004722 protein serine/threonine phosphatase activity	0.0218726	0	GO:0090609 single-species submerged biofilm formation	0.0110898	0	GO:0001077 transcriptional activator activity, RNA polymerase II core promoter proximal region sequence-specific binding	0.00743184	0
GO:0090304 nucleic acid metabolic process	0.0201286	0	GO:0071826 ribonucleoprotein complex subunit organization	0.0140113	0	GO:0008238 exopeptidase activity	0.0133806	0	GO:1900190 regulation of single-species biofilm formation	0.0172956	0	GO:0019212 phosphatase inhibitor activity	0.00751867	0	GO:0004831 tyrosine-tRNA ligase activity	0.00840336	0	GO:0031597 cytosolic proteasome complex	0.0179405	0	%AA_T	0.00787346	0	GO:0007186 G-protein coupled receptor signaling pathway	0.00850574	0	GO:0070274 RES complex	0.0187804	0	GO:2000217 regulation of invasive growth in response to glucose limitation	0.0218726	0	GO:0003373 dynamin family protein polymerization involved in membrane fission	0.0110898	0	GO:2000217 regulation of invasive growth in response to glucose limitation	0.00760493	0
GO:0043623 cellular protein complex assembly	0.0210067	0	GO:0046034 ATP metabolic process	0.0147265	0	GO:0006790 sulfur compound metabolic process	0.0136148	0	GO:1900187 regulation of cell adhesion involved in single-species biofilm formation	0.0172956	0	GO:0098813 nuclear chromosome segregation	0.00865942	0	GO:0008569 ATP-dependent microtubule motor activity, minus-end-directed	0.00840336	0	GO:0046503 glycerolipid catabolic process	0.0181681	0	GO:0030435 sporulation resulting in formation of a cellular spore	0.00805268	0	GO:0044422 organelle part	0.00863006	0	GO:0004707 MAP kinase activity	0.0187804	0	GO:0031907 microbody lumen	0.0218726	0	GO:2000218 negative regulation of invasive growth in response to glucose limitation	0.0110898	0	GO:0006998 nuclear envelope organization	0.00760493	0
%AA_R	0.0229052	0	%Helical	0.0149748	0	GO:0061733 peptide-lysine-N-acetyltransferase activity	0.014879	0	GO:0070419 nonhomologous end joining complex	0.0172956	0	GO:0090329 regulation of DNA-dependent DNA replication	0.00918112	0	GO:0004832 valine-tRNA ligase activity	0.00840336	0	GO:0006650 glycerophospholipid metabolic process	0.0202676	0	GO:0043934 sporulation	0.00805268	0	GO:0031163 metallo-sulfur cluster assembly	0.0089271	0	GO:0008623 CHRAC	0.0187804	0	GO:0016671 oxidoreductase activity, acting on a sulfur group of donors, disulfide as acceptor	0.0218726	0	GO:0043709 cell adhesion involved in single-species biofilm formation	0.0110898	0	GO:0000743 nuclear migration involved in conjugation with cellular fusion	0.00760493	0
GO:0044459 plasma membrane part	0.0236616	0	GO:0032879 regulation of localization	0.0153832	0	GO:0004402 histone acetyltransferase activity	0.014879	0	GO:0050708 regulation of protein secretion	0.0172956	0	GO:0033554 cellular response to stress	0.00933981	0	GO:0009256 10-formyltetrahydrofolate metabolic process	0.00840336	0	GO:0034249 negative regulation of cellular amide metabolic process	0.0221048	0	GO:0048646 anatomical structure formation involved in morphogenesis	0.00805268	0	GO:0016226 iron-sulfur cluster assembly	0.0089271	0	GO:0008535 respiratory chain complex IV assembly	0.0223167	0	GO:0097164 ammonium ion metabolic process	0.0218726	0	GO:0008252 nucleotidase activity	0.0110898	0	GO:0000976 transcription regulatory region sequence-specific DNA binding	0.00764097	0
GO:0071822 protein complex subunit organization	0.0236823	0	CDS_PARS_RNAstructure	0.0159422	0	GO:0015036 disulfide oxidoreductase activity	0.014879	0	GO:0010810 regulation of cell-substrate adhesion	0.0172956	0	GO:0007127 meiosis I	0.00986976	0	GO:0051128 regulation of cellular component organization	0.0120228	0	GO:0006644 phospholipid metabolic process	0.0242391	0	GO:0071010 prespliceosome	0.0096119	0	GO:0000209 protein polyubiquitination	0.0089271	0	GO:0050794 regulation of cellular process	0.0236312	0	GO:0005782 peroxisomal matrix	0.0218726	0	GO:0031589 cell-substrate adhesion	0.0110898	0	GO:1900428 regulation of filamentous growth of a population of unicellular organisms	0.00884896	0
GO:0008170 N-methyltransferase activity	0.0239859	0	GO:0009259 ribonucleotide metabolic process	0.0162724	0	GO:0031597 cytosolic proteasome complex	0.014879	0	GO:1900524 positive regulation of flocculation via cell wall protein-carbohydrate interaction by positive regulation of transcription from RNA polymerase II promoter	0.0172956	0	GO:0000278 mitotic cell cycle	0.0106958	0	GO:0046982 protein heterodimerization activity	0.0140915	0	GO:0006638 neutral lipid metabolic process	0.0264635	0	GO:0005686 U2 snRNP	0.0096119	0	GO:0032392 DNA geometric change	0.0089271	0	%AA_I	0.0238533	0	GO:2000220 regulation of pseudohyphal growth	0.0218726	0	GO:0090148 membrane fission	0.0110898	0	GO:0004003 ATP-dependent DNA helicase activity	0.00884896	0
GO:0000002 mitochondrial genome maintenance	0.0239859	0	GO:0071554 cell wall organization or biogenesis	0.0163233	0	GO:0045454 cell redox homeostasis	0.014879	0	GO:0008495 protoheme IX farnesyltransferase activity	0.0172956	0	GO:0043167 ion binding	0.0112712	0	GO:0006461 protein complex assembly	0.0145243	0	GO:0090002 establishment of protein localization to plasma membrane	0.0264635	0	GO:0071004 U2-type prespliceosome	0.0096119	0	GO:0000724 double-strand break repair via homologous recombination	0.00926333	0	GO:0022414 reproductive process	0.0247124	0	GO:0031970 organelle envelope lumen	0.0229789	0	GO:0008053 mitochondrial fusion	0.0110898	0	GO:0006997 nucleus organization	0.0115442	0
GO:0000049 tRNA binding	0.0269849	0	GO:0010628 positive regulation of gene expression	0.0163233	0	GO:0034599 cellular response to oxidative stress	0.0158936	0	GO:0048034 heme O biosynthetic process	0.0172956	0	GO:0070816 phosphorylation of RNA polymerase II C-terminal domain	0.0119967	0	GO:0016874 ligase activity	0.0154682	0	GO:0072659 protein localization to plasma membrane	0.0359806	0	GO:0005829 cytosol	0.0104767	0	GO:0032993 protein-DNA complex	0.00970545	0	GO:0097033 mitochondrial respiratory chain complex III biogenesis	0.0355558	0	GO:0005758 mitochondrial intermembrane space	0.0229789	0	GO:0042710 biofilm formation	0.0110898	0	GO:0001228 transcriptional activator activity, RNA polymerase II transcription regulatory region sequence-specific binding	0.0115442	0
GO:0016538 cyclin-dependent protein serine/threonine kinase regulator activity	0.0269849	0	GO:0008380 RNA splicing	0.0199549	0	GO:0006880 intracellular sequestering of iron ion	0.016089	0	GO:0005658 alpha DNA polymerase:primase complex	0.0172956	0	GO:0006950 response to stress	0.0120081	0	GO:0005090 Sar guanyl-nucleotide exchange factor activity	0.0167392	0	GO:1990778 protein localization to cell periphery	0.0359806	0	GO:0051704 multi-organism process	0.0139671	0	GO:0043234 protein complex	0.0114657	0	GO:0000349 generation of catalytic spliceosome for first transesterification step	0.0355558	0	GO:0070784 regulation of growth of unicellular organism as a thread of attached cells	0.0262531	0	GO:0003374 dynamin family protein polymerization involved in mitochondrial fission	0.0110898	0	GO:0000977 RNA polymerase II regulatory region sequence-specific DNA binding	0.0144117	0
GO:0098552 side of membrane	0.0269849	0	GO:0031647 regulation of protein stability	0.0200569	0	GO:0044275 cellular carbohydrate catabolic process	0.016089	0	GO:0010811 positive regulation of cell-substrate adhesion	0.0172956	0	GO:0016772 transferase activity, transferring phosphorus-containing groups	0.0130227	0	GO:0003777 microtubule motor activity	0.0167392	0	GO:0036094 small molecule binding	0.0374811	0	GO:0051174 regulation of phosphorus metabolic process	0.0154344	0	GO:0009141 nucleoside triphosphate metabolic process	0.0122936	0	GO:0000137 Golgi cis cisterna	0.0355558	0	GO:0001300 chronological cell aging	0.0262531	0	GO:0090605 submerged biofilm formation	0.0110898	0	GO:0004386 helicase activity	0.0144117	0
GO:0016070 RNA metabolic process	0.0280079	0	GO:0045116 protein neddylation	0.0200569	0	GO:0010821 regulation of mitochondrion organization	0.016089	0	GO:2000883 positive regulation of starch catabolic process	0.0172956	0	GO:0000221 vacuolar proton-transporting V-type ATPase, V1 domain	0.0145359	0	GO:0004488 methylenetetrahydrofolate dehydrogenase (NADP+) activity	0.0167392	0	SNP-MODERATE	0.0384832	0	GO:0019220 regulation of phosphate metabolic process	0.0154344	0	GO:0009058 biosynthetic process	0.0128917	0	GO:0016646 oxidoreductase activity, acting on the CH-NH group of donors, NAD or NADP as acceptor	0.0355558	0	GO:0005506 iron ion binding	0.0269974	0	GO:0043708 cell adhesion involved in biofilm formation	0.0110898	0	GO:0031226 intrinsic component of plasma membrane	0.0146818	0
GO:0070271 protein complex biogenesis	0.0295011	0	GO:0009141 nucleoside triphosphate metabolic process	0.0205141	0	GO:0019238 cyclohydrolase activity	0.016089	0	GO:0045785 positive regulation of cell adhesion	0.0172956	0	GO:0000439 core TFIIH complex	0.0145359	0	GO:0036257 multivesicular body organization	0.0167392	0	Num_AAChanges	0.0394938	0	GO:0000166 nucleotide binding	0.0157343	0	GO:0043596 nuclear replication fork	0.0133585	0	GO:0031010 ISWI-type complex	0.0355558	0	GO:0051052 regulation of DNA metabolic process	0.0303935	0	GO:0044010 single-species biofilm formation	0.0110898	0	GO:0042726 flavin-containing compound metabolic process	0.0147006	0
GO:0030695 GTPase regulator activity	0.0301037	0	GO:0051247 positive regulation of protein metabolic process	0.0206357	0	GO:0008541 proteasome regulatory particle, lid subcomplex	0.016089	0	GO:2000904 regulation of starch metabolic process	0.0172956	0	GO:0033180 proton-transporting V-type ATPase, V1 domain	0.0145359	0	GO:1990939 ATP-dependent microtubule motor activity	0.0167392	0	GO:1900374 positive regulation of mating type switching by regulation of transcription from RNA polymerase II promoter	0.0447907	0	GO:1901265 nucleoside phosphate binding	0.0157343	0	GO:0009144 purine nucleoside triphosphate metabolic process	0.0136276	0	GO:0031966 mitochondrial membrane	0.0387683	0	GO:0006461 protein complex assembly	0.0305572	0	GO:0044422 organelle part	0.0114484	0	GO:0010570 regulation of filamentous growth	0.0161236	0
GO:0015631 tubulin binding	0.0301037	0	GO:0032270 positive regulation of cellular protein metabolic process	0.0206357	0	GO:0097577 sequestering of iron ion	0.016089	0	GO:0035101 FACT complex	0.0172956	0	GO:0016846 carbon-sulfur lyase activity	0.0145359	0	GO:0004477 methenyltetrahydrofolate cyclohydrolase activity	0.0167392	0	GO:0036257 multivesicular body organization	0.0447907	0	GO:0031106 septin ring organization	0.0162944	0	GO:0051020 GTPase binding	0.0141339	0	GO:0018193 peptidyl-amino acid modification	0.0388942	0	GO:0005515 protein binding	0.0316449	0	GO:0044446 intracellular organelle part	0.0115915	0	GO:0005763 mitochondrial small ribosomal subunit	0.0161236	0
GO:0006607 NLS-bearing protein import into nucleus	0.0321978	0	median_IUPRED	0.0209112	0	GO:0051238 sequestering of metal ion	0.016089	0	GO:2000881 regulation of starch catabolic process	0.0172956	0	GO:0016301 kinase activity	0.0148006	0	GO:0005771 multivesicular body	0.0167392	0	GO:1904640 response to methionine	0.0447907	0	GO:0004222 metalloendopeptidase activity	0.0162944	0	GO:0033218 amide binding	0.0141339	0	GO:0072522 purine-containing compound biosynthetic process	0.0404094	0	GO:0015711 organic anion transport	0.0327611	0	GO:0070328 triglyceride homeostasis	0.0165914	0	GO:0000314 organellar small ribosomal subunit	0.0161236	0
GO:0000973 posttranscriptional tethering of RNA polymerase II gene DNA at nuclear periphery	0.0321978	0	GO:0045229 external encapsulating structure organization	0.0210019	0	GO:0016814 hydrolase activity, acting on carbon-nitrogen (but not peptide) bonds, in cyclic amidines	0.0161703	0	GO:0036095 positive regulation of invasive growth in response to glucose limitation by positive regulation of transcription from RNA polymerase II promoter	0.0172956	0	GO:0045143 homologous chromosome segregation	0.0158897	0	GO:0046931 pore complex assembly	0.0167392	0	GO:0006343 establishment of chromatin silencing	0.0447907	0	GO:0032505 reproduction of a single-celled organism	0.0173784	0	GO:0006575 cellular modified amino acid metabolic process	0.0151726	0	GO:0006888 ER to Golgi vesicle-mediated transport	0.0409318	0	GO:1901292 nucleoside phosphate catabolic process	0.0332441	0	GO:0009166 nucleotide catabolic process	0.0165914	0	GO:0098552 side of membrane	0.0161236	0
GO:0019878 lysine biosynthetic process via aminoadipic acid	0.0321978	0	GO:0071555 cell wall organization	0.0210019	0	GO:0046185 aldehyde catabolic process	0.0161703	0	GO:0048033 heme o metabolic process	0.0172956	0	GO:0051052 regulation of DNA metabolic process	0.0161731	0	GO:0000743 nuclear migration involved in conjugation with cellular fusion	0.0167392	0	GO:0006231 dTMP biosynthetic process	0.0447907	0	GO:0031966 mitochondrial membrane	0.017647	0	GO:0071103 DNA conformation change	0.0151726	0	GO:0072507 divalent inorganic cation homeostasis	0.0416915	0	GO:0015809 arginine transport	0.0332441	0	GO:0030061 mitochondrial crista	0.0165914	0	GO:0001012 RNA polymerase II regulatory region DNA binding	0.0166055	0
GO:0000972 transcription-dependent tethering of RNA polymerase II gene DNA at nuclear periphery	0.0321978	0	GO:0016043 cellular component organization	0.0211267	0	GO:0007010 cytoskeleton organization	0.0170421	0	GO:0060256 regulation of flocculation	0.0172956	0	GO:0006468 protein phosphorylation	0.016493	0	GO:0051292 nuclear pore complex assembly	0.0167392	0	GO:0048254 snoRNA localization	0.0447907	0	GO:0048856 anatomical structure development	0.0184622	0	GO:0006281 DNA repair	0.0156229	0	GO:0072503 cellular divalent inorganic cation homeostasis	0.0416915	0	GO:0034204 lipid translocation	0.0332441	0	GO:0055090 acylglycerol homeostasis	0.0165914	0	GO:0010468 regulation of gene expression	0.0167914	0
GO:0051274 beta-glucan biosynthetic process	0.0321978	0	GO:0005681 spliceosomal complex	0.0226945	0	GO:1902589 single-organism organelle organization	0.0172801	0	GO:0004339 glucan 1,4-alpha-glucosidase activity	0.0172956	0	GO:0007062 sister chromatid cohesion	0.0166061	0	GO:0070271 protein complex biogenesis	0.0167564	0	GO:0010731 protein glutathionylation	0.0447907	0	GO:0009653 anatomical structure morphogenesis	0.0184622	0	GO:0042887 amide transmembrane transporter activity	0.0158107	0	GO:0050789 regulation of biological process	0.0422656	0	GO:0007571 age-dependent general metabolic decline	0.0332441	0	GO:0097002 mitochondrial inner boundary membrane	0.0165914	0	GO:0044452 nucleolar part	0.0168911	0
GO:0051273 beta-glucan metabolic process	0.0321978	0	GO:0009152 purine ribonucleotide biosynthetic process	0.0228782	0	GO:0016787 hydrolase activity	0.0175841	0	GO:1900461 positive regulation of pseudohyphal growth by positive regulation of transcription from RNA polymerase II promoter	0.0172956	0	GO:0033036 macromolecule localization	0.0174093	0	GO:0006997 nucleus organization	0.0180232	0	GO:2000114 regulation of establishment of cell polarity	0.0447907	0	GO:0006725 cellular aromatic compound metabolic process	0.0191315	0	GO:0000967 rRNA 5'-end processing	0.0158107	0	GO:0006275 regulation of DNA replication	0.0438103	0	GO:0047429 nucleoside-triphosphate diphosphatase activity	0.0332441	0	GO:0043623 cellular protein complex assembly	0.0191704	0	GO:0015291 secondary active transmembrane transporter activity	0.0190114	0
GO:0016780 phosphotransferase activity, for other substituted phosphate groups	0.0321978	0	%AA_Q	0.0229325	0	GO:0001932 regulation of protein phosphorylation	0.0177503	0	GO:0002791 regulation of peptide secretion	0.0172956	0	GO:0051276 chromosome organization	0.018179	0	GO:0005770 late endosome	0.0180232	0	GO:1900478 positive regulation of sulfate assimilation by positive regulation of transcription from RNA polymerase II promoter	0.0447907	0	GO:0031401 positive regulation of protein modification process	0.0191614	0	GO:0003899 DNA-directed 5'-3' RNA polymerase activity	0.0158107	0	GO:0016651 oxidoreductase activity, acting on NAD(P)H	0.0438103	0	GO:0045732 positive regulation of protein catabolic process	0.0332441	0	physical_association	0.0193008	0	GO:0003678 DNA helicase activity	0.0207082	0
GO:0001932 regulation of protein phosphorylation	0.0326892	0	GO:0051254 positive regulation of RNA metabolic process	0.0230182	0	suppressive_genetic_interaction	0.0189526	0	GO:1900189 positive regulation of cell adhesion involved in single-species biofilm formation	0.0172956	0	GO:0022402 cell cycle process	0.0193112	0	GO:0016879 ligase activity, forming carbon-nitrogen bonds	0.0208738	0	GO:0015729 oxaloacetate transport	0.0447907	0	GO:0010927 cellular component assembly involved in morphogenesis	0.0191614	0	GO:0000966 RNA 5'-end processing	0.0158107	0	GO:0044272 sulfur compound biosynthetic process	0.046775	0	GO:0005744 mitochondrial inner membrane presequence translocase complex	0.0332441	0	%AA_F	0.0211279	0	GO:0065007 biological regulation	0.0227409	0
%Beta-sheet	0.0355682	0	GO:0009161 ribonucleoside monophosphate metabolic process	0.0230455	0	GO:0006081 cellular aldehyde metabolic process	0.0197984	0	GO:1990527 Tec1p-Ste12p-Dig1p complex	0.0172956	0	GO:0017004 cytochrome complex assembly	0.0204102	0	GO:0043226 organelle	0.0215969	0	GO:0009157 deoxyribonucleoside monophosphate biosynthetic process	0.0447907	0	GO:0042325 regulation of phosphorylation	0.0192851	0	GO:0034471 ncRNA 5'-end processing	0.0158107	0	GO:0048519 negative regulation of biological process	0.0470365	0	GO:0015824 proline transport	0.0332441	0	GO:0051292 nuclear pore complex assembly	0.0220643	0	GO:0000975 regulatory region DNA binding	0.0228827	0
GO:0007029 endoplasmic reticulum organization	0.0364043	0	GO:1901990 regulation of mitotic cell cycle phase transition	0.0247446	0	GO:0015035 protein disulfide oxidoreductase activity	0.0205461	0	GO:1901673 regulation of mitotic spindle assembly	0.0172956	0	GO:1990391 DNA repair complex	0.0204102	0	GO:0043229 intracellular organelle	0.0216173	0	GO:1902975 mitotic DNA replication initiation	0.0447907	0	GO:0016556 mRNA modification	0.0193666	0	GO:0034062 5'-3' RNA polymerase activity	0.0158107	0	GO:0006694 steroid biosynthetic process	0.0528643	0	GO:0001306 age-dependent response to oxidative stress	0.0332441	0	GO:1901292 nucleoside phosphate catabolic process	0.0220643	0	GO:0044212 transcription regulatory region DNA binding	0.0228827	0
GO:0098772 molecular function regulator	0.036831	0	GO:1901987 regulation of cell cycle phase transition	0.0247446	0	GO:0006979 response to oxidative stress	0.0214187	0	GO:0004408 holocytochrome-c synthase activity	0.0172956	0	GO:0006818 hydrogen transport	0.0212369	0	GO:0071822 protein complex subunit organization	0.0218503	0	GO:0009177 pyrimidine deoxyribonucleoside monophosphate biosynthetic process	0.0447907	0	GO:0035786 protein complex oligomerization	0.0193666	0	GO:0070035 purine NTP-dependent helicase activity	0.016691	0	GO:0030135 coated vesicle	0.053112	0	GO:0042816 vitamin B6 metabolic process	0.0332441	0	GO:0007155 cell adhesion	0.0220643	0	GO:0050000 chromosome localization	0.023684	0
GO:0006970 response to osmotic stress	0.0389337	0	GO:0010557 positive regulation of macromolecule biosynthetic process	0.0268355	0	GO:0046872 metal ion binding	0.022596	0	GO:1900192 positive regulation of single-species biofilm formation	0.0172956	0	GO:0015992 proton transport	0.0212369	0	GO:0006996 organelle organization	0.0233269	0	GO:0090114 COPII-coated vesicle budding	0.0447907	0	GO:0000400 four-way junction DNA binding	0.0193666	0	GO:0008026 ATP-dependent helicase activity	0.016691	0	GO:0071011 precatalytic spliceosome	0.0539785	0	GO:0006768 biotin metabolic process	0.0332441	0	GO:0022610 biological adhesion	0.0220643	0	GO:0015846 polyamine transport	0.023684	0
GO:0072521 purine-containing compound metabolic process	0.0390276	0	GO:0016071 mRNA metabolic process	0.0268355	0	GO:0006897 endocytosis	0.0237047	0	GO:0035957 positive regulation of starch catabolic process by positive regulation of transcription from RNA polymerase II promoter	0.0172956	0	GO:0042623 ATPase activity, coupled	0.0218829	0	GO:0031410 cytoplasmic vesicle	0.0241307	0	GO:0035352 NAD transmembrane transport	0.0447907	0	GO:0031518 CBF3 complex	0.0193666	0	geneLen	0.0171484	0	%AA_V	0.0545694	0	GO:0046184 aldehyde biosynthetic process	0.0332441	0	GO:0046931 pore complex assembly	0.0220643	0	GO:0010970 transport along microtubule	0.023684	0
GO:0019207 kinase regulator activity	0.0448691	0	GO:0006812 cation transport	0.0283655	0	GO:0098573 intrinsic component of mitochondrial membrane	0.02534	0	GO:0004311 farnesyltranstransferase activity	0.0172956	0	GO:0006260 DNA replication	0.0218829	0	GO:0097708 intracellular vesicle	0.0241307	0	GO:0009176 pyrimidine deoxyribonucleoside monophosphate metabolic process	0.0447907	0	GO:0089713 Cbf1-Met4-Met28 complex	0.0193666	0	GO:0009205 purine ribonucleoside triphosphate metabolic process	0.0201391	0	GO:0031970 organelle envelope lumen	0.0548452	0	GO:0042823 pyridoxal phosphate biosynthetic process	0.0332441	0	GO:0070785 negative regulation of growth of unicellular organism as a thread of attached cells	0.0220643	0	GO:0045927 positive regulation of growth	0.023684	0
GO:0019887 protein kinase regulator activity	0.0448691	0	GO:0065004 protein-DNA complex assembly	0.0300553	0	GO:0016407 acetyltransferase activity	0.02534	0	GO:1900479 positive regulation of flocculation via cell wall protein-carbohydrate interaction	0.0172956	0	GO:0043101 purine-containing compound salvage	0.0234218	0	GO:0031982 vesicle	0.024723	0	GO:0030397 membrane disassembly	0.0447907	0	GO:2000765 regulation of cytoplasmic translation	0.0193666	0	GO:0046034 ATP metabolic process	0.0201391	0	GO:0005758 mitochondrial intermembrane space	0.0548452	0	GO:0019878 lysine biosynthetic process via aminoadipic acid	0.0332441	0	GO:0008312 7S RNA binding	0.0220643	0	GO:0019897 extrinsic component of plasma membrane	0.023684	0
GO:0043549 regulation of kinase activity	0.0452993	0	GO:0006779 porphyrin-containing compound biosynthetic process	0.0310511	0	GO:0042393 histone binding	0.0253481	0	GO:0030155 regulation of cell adhesion	0.0172956	0	GO:0046185 aldehyde catabolic process	0.0234218	0	GO:0046475 glycerophospholipid catabolic process	0.0250079	0	GO:0006655 phosphatidylglycerol biosynthetic process	0.0447907	0	GO:0043489 RNA stabilization	0.0193666	0	%AA_D	0.0222516	0	GO:0000276 mitochondrial proton-transporting ATP synthase complex, coupling factor F(o)	0.0561181	0	GO:0045332 phospholipid translocation	0.0332441	0	GO:0047429 nucleoside-triphosphate diphosphatase activity	0.0220643	0	GO:1902047 polyamine transmembrane transport	0.023684	0
GO:0045859 regulation of protein kinase activity	0.0452993	0	GO:0033013 tetrapyrrole metabolic process	0.0310511	0	GO:0030687 preribosome, large subunit precursor	0.0253481	0	GO:0035956 regulation of starch catabolic process by regulation of transcription from RNA polymerase II promoter	0.0172956	0	GO:0007080 mitotic metaphase plate congression	0.0234218	0	GO:0090113 regulation of ER to Golgi vesicle-mediated transport by GTP hydrolysis	0.0250079	0	GO:0045597 positive regulation of cell differentiation	0.0447907	0	GO:0031335 regulation of sulfur amino acid metabolic process	0.0193666	0	GO:0044249 cellular biosynthetic process	0.0222746	0	GO:0072659 protein localization to plasma membrane	0.0561181	0	GO:0015175 neutral amino acid transmembrane transporter activity	0.0332441	0	GO:0004338 glucan exo-1,3-beta-glucosidase activity	0.0220643	0	GO:0090033 positive regulation of filamentous growth	0.023684	0
GO:0010675 regulation of cellular carbohydrate metabolic process	0.0472813	0	GO:0006778 porphyrin-containing compound metabolic process	0.0310511	0	GO:0006289 nucleotide-excision repair	0.0253481	0	GO:0010527 positive regulation of transposition, RNA-mediated	0.0172956	0	GO:0051310 metaphase plate congression	0.0234218	0	GO:0003400 regulation of COPII vesicle coating	0.0250079	0	GO:0034496 multivesicular body membrane disassembly	0.0447907	0	GO:0048255 mRNA stabilization	0.0193666	0	GO:0044425 membrane part	0.0223124	0	GO:0006067 ethanol metabolic process	0.0561181	0	GO:0042819 vitamin B6 biosynthetic process	0.0332441	0	%AA_S	0.0256786	0	GO:0009898 cytoplasmic side of plasma membrane	0.023684	0
GO:0051258 protein polymerization	0.0472813	0	GO:0033014 tetrapyrrole biosynthetic process	0.0310511	0	GO:0000278 mitotic cell cycle	0.0253707	0	GO:0098772 molecular function regulator	0.0182892	0	GO:0051315 attachment of mitotic spindle microtubules to kinetochore	0.0234218	0	GO:0031082 BLOC complex	0.0250079	0	GO:0031496 positive regulation of mating type switching	0.0447907	0	GO:0018026 peptidyl-lysine monomethylation	0.0193666	0	GO:0000314 organellar small ribosomal subunit	0.0224195	0	GO:0006047 UDP-N-acetylglucosamine metabolic process	0.0561181	0	GO:0009102 biotin biosynthetic process	0.0332441	0	GO:0048500 signal recognition particle	0.0275086	0	GO:0030473 nuclear migration along microtubule	0.023684	0
GO:0016866 intramolecular transferase activity	0.0472813	0	GO:0043094 cellular metabolic compound salvage	0.0310511	0	GO:0000003 reproduction	0.0263303	0	GO:0005977 glycogen metabolic process	0.0202086	0	GO:0034398 telomere tethering at nuclear periphery	0.0234218	0	GO:0006658 phosphatidylserine metabolic process	0.0250079	0	GO:0043132 NAD transport	0.0447907	0	GO:0006259 DNA metabolic process	0.0195199	0	GO:0005874 microtubule	0.0224195	0	GO:0090002 establishment of protein localization to plasma membrane	0.0561181	0	GO:0009085 lysine biosynthetic process	0.0332441	0	GO:0015891 siderophore transport	0.0275086	0	GO:0072384 organelle transport along microtubule	0.023684	0
GO:0042325 regulation of phosphorylation	0.0483824	0	GO:0042168 heme metabolic process	0.0310511	0	GO:0019236 response to pheromone	0.0264403	0	GO:0032511 late endosome to vacuole transport via multivesicular body sorting pathway	0.0202086	0	GO:0008353 RNA polymerase II carboxy-terminal domain kinase activity	0.0234218	0	GO:1901409 positive regulation of phosphorylation of RNA polymerase II C-terminal domain	0.0250079	0	GO:0061432 regulation of transcription from RNA polymerase II promoter in response to methionine	0.0447907	0	GO:0046483 heterocycle metabolic process	0.0196716	0	GO:0005763 mitochondrial small ribosomal subunit	0.0224195	0	GO:0006816 calcium ion transport	0.0561181	0	GO:0042822 pyridoxal phosphate metabolic process	0.0332441	0	GO:0005786 signal recognition particle, endoplasmic reticulum targeting	0.0275086	0	GO:1900430 positive regulation of filamentous growth of a population of unicellular organisms	0.023684	0
GO:0008047 enzyme activator activity	0.0483824	0	GO:0006783 heme biosynthetic process	0.0310511	0	GO:0000793 condensed chromosome	0.026698	0	GO:0032509 endosome transport via multivesicular body sorting pathway	0.0233202	0	GO:0033178 proton-transporting two-sector ATPase complex, catalytic domain	0.0234218	0	GO:0016530 metallochaperone activity	0.0250079	0	GO:1902356 oxaloacetate(2-) transmembrane transport	0.0447907	0	GO:0051179 localization	0.0197912	0	GO:0009167 purine ribonucleoside monophosphate metabolic process	0.0229709	0	GO:0006874 cellular calcium ion homeostasis	0.0561181	0	GO:0044088 regulation of vacuole organization	0.0332441	0	GO:0043200 response to amino acid	0.0275086	0	GO:0046173 polyol biosynthetic process	0.023684	0
GO:0009150 purine ribonucleotide metabolic process	0.0483824	0	GO:0030154 cell differentiation	0.0310551	0	GO:0006644 phospholipid metabolic process	0.0267662	0	GO:0016538 cyclin-dependent protein serine/threonine kinase regulator activity	0.0266155	0	GO:0035822 gene conversion	0.0234218	0	GO:0031083 BLOC-1 complex	0.0250079	0	GO:0061427 negative regulation of ceramide biosynthetic process by negative regulation of transcription from RNA Polymerase II promoter	0.0447907	0	GO:1903046 meiotic cell cycle process	0.0210754	0	GO:0009126 purine nucleoside monophosphate metabolic process	0.0229709	0	GO:0045263 proton-transporting ATP synthase complex, coupling factor F(o)	0.0561181	0	GO:0046942 carboxylic acid transport	0.0335891	0	GO:0015688 iron chelate transport	0.0275086	0	GO:0001067 regulatory region nucleic acid binding	0.0253353	0
GO:0022613 ribonucleoprotein complex biogenesis	0.0494455	0	GO:0005319 lipid transporter activity	0.031174	0	GO:0042325 regulation of phosphorylation	0.0267662	0	GO:1900428 regulation of filamentous growth of a population of unicellular organisms	0.0266155	0	GO:0045814 negative regulation of gene expression, epigenetic	0.0248357	0	GO:0060236 regulation of mitotic spindle organization	0.0250079	0	GO:0009162 deoxyribonucleoside monophosphate metabolic process	0.0447907	0	GO:1901360 organic cyclic compound metabolic process	0.0211988	0	GO:0009123 nucleoside monophosphate metabolic process	0.024369	0	GO:0000974 Prp19 complex	0.0561181	0	GO:0015849 organic acid transport	0.0335891	0	GO:0003993 acid phosphatase activity	0.0275086	0	GO:0044042 glucan metabolic process	0.0259339	0
GO:0046785 microtubule polymerization	0.0509638	0	%AA_F	0.0317452	0	GO:0043169 cation binding	0.0283016	0	GO:0006112 energy reserve metabolic process	0.0266155	0	GO:0006342 chromatin silencing	0.0248357	0	GO:0007535 donor selection	0.0250079	0	GO:0006624 vacuolar protein processing	0.0447907	0	GO:0046933 proton-transporting ATP synthase activity, rotational mechanism	0.021563	0	GO:0031224 intrinsic component of membrane	0.0243967	0	GO:0055074 calcium ion homeostasis	0.0561181	0	GO:0070271 protein complex biogenesis	0.0342533	0	GO:0000433 negative regulation of transcription from RNA polymerase II promoter by glucose	0.0275086	0	GO:0006073 cellular glucan metabolic process	0.0259339	0
GO:0001671 ATPase activator activity	0.0509638	0	GO:0098655 cation transmembrane transport	0.0330456	0	GO:0051054 positive regulation of DNA metabolic process	0.0283376	0	GO:0000079 regulation of cyclin-dependent protein serine/threonine kinase activity	0.0300876	0	GO:0072525 pyridine-containing compound biosynthetic process	0.0255636	0	GO:0033043 regulation of organelle organization	0.0253242	0	GO:1902315 nuclear cell cycle DNA replication initiation	0.0447907	0	GO:0006337 nucleosome disassembly	0.021563	0	GO:0046983 protein dimerization activity	0.0245186	0	%AA_S	0.056234	0	GO:0019219 regulation of nucleobase-containing compound metabolic process	0.035176	0	GO:0045014 negative regulation of transcription by glucose	0.0275086	0	GO:0010256 endomembrane system organization	0.0274375	0
GO:0044232 organelle membrane contact site	0.0509638	0	GO:0005618 cell wall	0.0336805	0	GO:0044445 cytosolic part	0.033752	0	GO:0036003 positive regulation of transcription from RNA polymerase II promoter in response to stress	0.0300876	0	GO:0000990 transcription factor activity, core RNA polymerase binding	0.0255636	0	GO:0071840 cellular component organization or biogenesis	0.0276616	0	GO:1900059 positive regulation of sulfate assimilation	0.0447907	0	GO:0010565 regulation of cellular ketone metabolic process	0.021563	0	GO:0005096 GTPase activator activity	0.0259038	0	GO:0045787 positive regulation of cell cycle	0.0737716	0	GO:0009636 response to toxic substance	0.0353663	0	GO:0006461 protein complex assembly	0.0277805	0	GO:0005887 integral component of plasma membrane	0.0308952	0
GO:0005793 endoplasmic reticulum-Golgi intermediate compartment	0.0509638	0	GO:0030312 external encapsulating structure	0.0336805	0	GO:0016209 antioxidant activity	0.0338767	0	GO:0015926 glucosidase activity	0.0337296	0	GO:0045132 meiotic chromosome segregation	0.026982	0	GO:0043603 cellular amide metabolic process	0.0287859	0	GO:0001732 formation of cytoplasmic translation initiation complex	0.0447907	0	GO:0031498 chromatin disassembly	0.021563	0	GO:0044703 multi-organism reproductive process	0.0262079	0	GO:0071427 mRNA-containing ribonucleoprotein complex export from nucleus	0.0737716	0	%AA_F	0.0404208	0	GO:0070271 protein complex biogenesis	0.0321109	0	GO:0051252 regulation of RNA metabolic process	0.0310533	0
GO:0044613 nuclear pore central transport channel	0.0509638	0	GO:0022607 cellular component assembly	0.0343486	0	GO:0098869 cellular oxidant detoxification	0.0338767	0	GO:0045787 positive regulation of cell cycle	0.0337296	0	GO:0015672 monovalent inorganic cation transport	0.0270669	0	GO:0005768 endosome	0.0288672	0	GO:0061431 cellular response to methionine	0.0447907	0	GO:0042762 regulation of sulfur metabolic process	0.021563	0	GO:0019953 sexual reproduction	0.0262079	0	GO:0006406 mRNA export from nucleus	0.0737716	0	GO:0044242 cellular lipid catabolic process	0.0412599	0	GO:2000217 regulation of invasive growth in response to glucose limitation	0.0329245	0	GO:0031965 nuclear membrane	0.0316602	0
GO:0042724 thiamine-containing compound biosynthetic process	0.0509638	0	GO:0030532 small nuclear ribonucleoprotein complex	0.0368796	0	GO:0000228 nuclear chromosome	0.0339968	0	GO:0010570 regulation of filamentous growth	0.0337296	0	GO:0016458 gene silencing	0.0274081	0	GO:0000132 establishment of mitotic spindle orientation	0.0332101	0	GO:0046073 dTMP metabolic process	0.0447907	0	GO:0032986 protein-DNA complex disassembly	0.021563	0	GO:0071944 cell periphery	0.0262777	0	GO:0006164 purine nucleotide biosynthetic process	0.0737716	0	GO:0010570 regulation of filamentous growth	0.0412599	0	GO:0047484 regulation of response to osmotic stress	0.0329245	0	GO:0005628 prospore membrane	0.0316602	0
GO:0031119 tRNA pseudouridine synthesis	0.0509638	0	GO:0097525 spliceosomal snRNP complex	0.0368796	0	GO:1903047 mitotic cell cycle process	0.0341052	0	GO:0046160 heme a metabolic process	0.0342987	0	GO:0007059 chromosome segregation	0.0283938	0	GO:0060628 regulation of ER to Golgi vesicle-mediated transport	0.0332101	0	GO:0030272 5-formyltetrahydrofolate cyclo-ligase activity	0.0447907	0	GO:0051321 meiotic cell cycle	0.0219625	0	GO:0016020 membrane	0.0265006	0	%AA_E	0.0761738	0	GO:1900428 regulation of filamentous growth of a population of unicellular organisms	0.0412599	0	GO:1900429 negative regulation of filamentous growth of a population of unicellular organisms	0.0329245	0	GO:0042763 intracellular immature spore	0.0316602	0
GO:0009228 thiamine biosynthetic process	0.0509638	0	GO:0006970 response to osmotic stress	0.0368796	0	GO:0006508 proteolysis	0.0342838	0	GO:0097320 plasma membrane tubulation	0.0342987	0	5UTR_PARS_RNAstructure	0.029931	0	GO:0090224 regulation of spindle organization	0.0332101	0	GO:1900058 regulation of sulfate assimilation	0.0447907	0	GO:1901363 heterocyclic compound binding	0.0219709	0	GO:0031505 fungal-type cell wall organization	0.0270522	0	%Proteinturn	0.0783249	0	GO:0015631 tubulin binding	0.0412599	0	GO:0071786 endoplasmic reticulum tubular network organization	0.0329245	0	GO:0042764 ascospore-type prospore	0.0316602	0
GO:0031109 microtubule polymerization or depolymerization	0.0509638	0	GO:0043492 ATPase activity, coupled to movement of substances	0.0373036	0	GO:0005739 mitochondrion	0.0352344	0	GO:0005980 glycogen catabolic process	0.0342987	0	GO:0009108 coenzyme biosynthetic process	0.0301518	0	GO:0051294 establishment of spindle orientation	0.0332101	0	GO:0015131 oxaloacetate transmembrane transporter activity	0.0447907	0	GO:0097159 organic cyclic compound binding	0.0219738	0	GO:1904680 peptide transmembrane transporter activity	0.0275174	0	SNP-HIGH	0.0790584	0	GO:0009896 positive regulation of catabolic process	0.0412599	0	GO:0019897 extrinsic component of plasma membrane	0.0329245	0	GO:0043596 nuclear replication fork	0.0317999	0
GO:0007020 microtubule nucleation	0.0509638	0	GO:0009408 response to heat	0.0373036	0	GO:0031163 metallo-sulfur cluster assembly	0.0357272	0	GO:0018548 pentaerythritol trinitrate reductase activity	0.0342987	0	GO:0040029 regulation of gene expression, epigenetic	0.0330706	0	GO:1901800 positive regulation of proteasomal protein catabolic process	0.0332101	0	GO:1902292 cell cycle DNA replication initiation	0.0447907	0	GO:0006974 cellular response to DNA damage stimulus	0.022447	0	GO:0000447 endonucleolytic cleavage in ITS1 to separate SSU-rRNA from 5.8S rRNA and LSU-rRNA from tricistronic rRNA transcript (SSU-rRNA, 5.8S rRNA, LSU-rRNA)	0.0275174	0	GO:0005057 signal transducer activity, downstream of receptor	0.0797458	0	%AA_H	0.0412966	0	GO:0016791 phosphatase activity	0.0350516	0	GO:0040008 regulation of growth	0.0317999	0
GO:0016776 phosphotransferase activity, phosphate group as acceptor	0.0509638	0	GO:0051173 positive regulation of nitrogen compound metabolic process	0.0379536	0	GO:0031304 intrinsic component of mitochondrial inner membrane	0.0357272	0	GO:0051091 positive regulation of sequence-specific DNA binding transcription factor activity	0.0342987	0	GO:0006261 DNA-dependent DNA replication	0.0330706	0	GO:0048209 regulation of vesicle targeting, to, from or within Golgi	0.0332101	0	GO:0051724 NAD transporter activity	0.0447907	0	GO:0005488 binding	0.0230126	0	GO:0000472 endonucleolytic cleavage to generate mature 5'-end of SSU-rRNA from (SSU-rRNA, 5.8S rRNA, LSU-rRNA)	0.0275174	0	GO:0030174 regulation of DNA-dependent DNA replication initiation	0.0797458	0	GO:0005666 DNA-directed RNA polymerase III complex	0.0424672	0	GO:0019898 extrinsic component of membrane	0.0374791	0	GO:0032508 DNA duplex unwinding	0.0317999	0
GO:0009085 lysine biosynthetic process	0.0509638	0	GO:0007163 establishment or maintenance of cell polarity	0.0382382	0	GO:0016226 iron-sulfur cluster assembly	0.0357272	0	GO:0060211 regulation of nuclear-transcribed mRNA poly(A) tail shortening	0.0342987	0	GO:0051188 cofactor biosynthetic process	0.0334019	0	GO:0045737 positive regulation of cyclin-dependent protein serine/threonine kinase activity	0.0332101	0	GO:0044697 HICS complex	0.0447907	0	GO:0090304 nucleic acid metabolic process	0.0232488	0	GO:0032508 DNA duplex unwinding	0.0275174	0	GO:0016645 oxidoreductase activity, acting on the CH-NH group of donors	0.0797458	0	GO:0001056 RNA polymerase III activity	0.0424672	0	GO:0045013 carbon catabolite repression of transcription	0.0383121	0	GO:0005351 sugar:proton symporter activity	0.0343461	0
GO:0019220 regulation of phosphate metabolic process	0.0518461	0	GO:0007346 regulation of mitotic cell cycle	0.0382382	0	GO:0048583 regulation of response to stimulus	0.0365913	0	GO:0032807 DNA ligase IV complex	0.0342987	0	GO:0008324 cation transmembrane transporter activity	0.0334019	0	GO:0030472 mitotic spindle organization in nucleus	0.0332101	0	GO:0004496 mevalonate kinase activity	0.0447907	0	GO:0031981 nuclear lumen	0.0237394	0	GO:0006301 postreplication repair	0.0275174	0	GO:0006084 acetyl-CoA metabolic process	0.0797458	0	GO:0015171 amino acid transmembrane transporter activity	0.0434147	0	GO:0045926 negative regulation of growth	0.0383121	0	GO:0007018 microtubule-based movement	0.0343461	0
GO:0051174 regulation of phosphorus metabolic process	0.0518461	0	GO:0072522 purine-containing compound biosynthetic process	0.0387398	0	GO:0000749 response to pheromone involved in conjugation with cellular fusion	0.0367284	0	GO:0017006 protein-tetrapyrrole linkage	0.0342987	0	GO:0004003 ATP-dependent DNA helicase activity	0.0339705	0	GO:1901407 regulation of phosphorylation of RNA polymerase II C-terminal domain	0.0332101	0	GO:0070382 exocytic vesicle	0.0447907	0	GO:0009058 biosynthetic process	0.0244744	0	GO:0000480 endonucleolytic cleavage in 5'-ETS of tricistronic rRNA transcript (SSU-rRNA, 5.8S rRNA, LSU-rRNA)	0.0275174	0	GO:0004529 exodeoxyribonuclease activity	0.0797458	0	GO:0007129 synapsis	0.0434147	0	GO:0000266 mitochondrial fission	0.0383121	0	GO:0000164 protein phosphatase type 1 complex	0.0343461	0
GO:0019693 ribose phosphate metabolic process	0.0543947	0	GO:0019693 ribose phosphate metabolic process	0.0398658	0	GO:0031400 negative regulation of protein modification process	0.0367284	0	GO:0070985 TFIIK complex	0.0342987	0	GO:0005847 mRNA cleavage and polyadenylation specificity factor complex	0.0339705	0	GO:1903364 positive regulation of cellular protein catabolic process	0.0332101	0	GO:0019778 Atg12 activating enzyme activity	0.0447907	0	GO:0006139 nucleobase-containing compound metabolic process	0.0252644	0	GO:0008320 protein transmembrane transporter activity	0.0275174	0	GO:1901068 guanosine-containing compound metabolic process	0.0797458	0	GO:0003333 amino acid transmembrane transport	0.0434147	0	GO:0000437 carbon catabolite repression of transcription from RNA polymerase II promoter	0.0383121	0	GO:0044091 membrane biogenesis	0.0343461	0
GO:0005783 endoplasmic reticulum	0.0579932	0	GO:0022618 ribonucleoprotein complex assembly	0.0402995	0	GO:0032592 integral component of mitochondrial membrane	0.0375428	0	GO:0010530 positive regulation of transposition	0.0342987	0	GO:0043173 nucleotide salvage	0.0339705	0	GO:0036402 proteasome-activating ATPase activity	0.0332101	0	GO:0033290 eukaryotic 48S preinitiation complex	0.0447907	0	GO:0009142 nucleoside triphosphate biosynthetic process	0.02617	0	GO:0015266 protein channel activity	0.0275174	0	GO:0019237 centromeric DNA binding	0.0797458	0	GO:0006399 tRNA metabolic process	0.0441321	0	GO:0000430 regulation of transcription from RNA polymerase II promoter by glucose	0.0383121	0	GO:0051119 sugar transmembrane transporter activity	0.0343461	0
GO:0016021 integral component of membrane	0.0593788	0	GO:0042623 ATPase activity, coupled	0.0402995	0	GO:0016573 histone acetylation	0.0375428	0	GO:0003959 NADPH dehydrogenase activity	0.0342987	0	GO:2000278 regulation of DNA biosynthetic process	0.0339705	0	GO:0019238 cyclohydrolase activity	0.0332101	0	GO:0010455 positive regulation of cell fate commitment	0.0447907	0	GO:0055070 copper ion homeostasis	0.02617	0	GO:0022884 macromolecule transmembrane transporter activity	0.0275174	0	GO:0034308 primary alcohol metabolic process	0.0797458	0	GO:0004141 dethiobiotin synthase activity	0.0461939	0	GO:0009251 glucan catabolic process	0.0383121	0	GO:0035428 hexose transmembrane transport	0.0343461	0
GO:0016128 phytosteroid metabolic process	0.0595618	0	GO:0045893 positive regulation of transcription, DNA-templated	0.0409347	0	GO:0006275 regulation of DNA replication	0.0375428	0	GO:0000121 glycerol-1-phosphatase activity	0.0342987	0	GO:0033176 proton-transporting V-type ATPase complex	0.0339705	0	GO:0008540 proteasome regulatory particle, base subcomplex	0.0332101	0	GO:0070250 mating projection membrane	0.0447907	0	GO:0032185 septin cytoskeleton organization	0.02617	0	GO:0009108 coenzyme biosynthetic process	0.0285371	0	GO:0009185 ribonucleoside diphosphate metabolic process	0.0797458	0	GO:0006616 SRP-dependent cotranslational protein targeting to membrane, translocation	0.0461939	0	GO:0060258 negative regulation of filamentous growth	0.0383121	0	GO:0034219 carbohydrate transmembrane transport	0.0343461	0
GO:0044107 cellular alcohol metabolic process	0.0595618	0	GO:1902680 positive regulation of RNA biosynthetic process	0.0409347	0	GO:0046486 glycerolipid metabolic process	0.0387849	0	GO:0090169 regulation of spindle assembly	0.0342987	0	GO:0034087 establishment of mitotic sister chromatid cohesion	0.0339705	0	GO:1903052 positive regulation of proteolysis involved in cellular protein catabolic process	0.0332101	0	GO:0030611 arsenate reductase activity	0.0447907	0	GO:0035639 purine ribonucleoside triphosphate binding	0.0283788	0	GO:0000322 storage vacuole	0.0297725	0	GO:0045259 proton-transporting ATP synthase complex	0.0797458	0	GO:0031371 ubiquitin conjugating enzyme complex	0.0461939	0	GO:0032991 macromolecular complex	0.0395802	0	GO:0005355 glucose transmembrane transporter activity	0.0343461	0
GO:0008204 ergosterol metabolic process	0.0595618	0	GO:1903508 positive regulation of nucleic acid-templated transcription	0.0409347	0	GO:0030120 vesicle coat	0.0388644	0	GO:0018063 cytochrome c-heme linkage	0.0342987	0	GO:1903311 regulation of mRNA metabolic process	0.0339705	0	GO:0035999 tetrahydrofolate interconversion	0.0332101	0	GO:0030907 MBF transcription complex	0.0447907	0	GO:0032555 purine ribonucleotide binding	0.0283788	0	GO:0000323 lytic vacuole	0.0297725	0	GO:0070129 regulation of mitochondrial translation	0.0797458	0	GO:0043066 negative regulation of apoptotic process	0.0461939	0	GO:0071822 protein complex subunit organization	0.0403313	0	GO:1904659 glucose transmembrane transport	0.0343461	0
GO:0008017 microtubule binding	0.0595618	0	GO:0034622 cellular macromolecular complex assembly	0.0410638	0	GO:0016413 O-acetyltransferase activity	0.0388644	0	GO:0072353 cellular age-dependent response to reactive oxygen species	0.0342987	0	GO:0016471 vacuolar proton-transporting V-type ATPase complex	0.0339705	0	GO:0071786 endoplasmic reticulum tubular network organization	0.0332101	0	GO:0047407 ADP-ribosyl-[dinitrogen reductase] hydrolase activity	0.0447907	0	GO:0017076 purine nucleotide binding	0.0285206	0	GO:0000324 fungal-type vacuole	0.0297725	0	GO:1990778 protein localization to cell periphery	0.0797458	0	GO:1900461 positive regulation of pseudohyphal growth by positive regulation of transcription from RNA polymerase II promoter	0.0461939	0	GO:0016311 dephosphorylation	0.0412403	0	GO:0015145 monosaccharide transmembrane transporter activity	0.0343461	0
GO:1990904 ribonucleoprotein complex	0.0599591	0	GO:0045930 negative regulation of mitotic cell cycle	0.0476336	0	GO:0006284 base-excision repair	0.0388644	0	GO:0052690 trichloro-p-hydroquinone reductive dehalogenase activity	0.0342987	0	GO:0034397 telomere localization	0.0339705	0	GO:0031595 nuclear proteasome complex	0.0332101	0	GO:0005771 multivesicular body	0.0447907	0	GO:1901576 organic substance biosynthetic process	0.028835	0	GO:0000001 mitochondrion inheritance	0.031551	0	GO:0004702 signal transducer, downstream of receptor, with serine/threonine kinase activity	0.0797458	0	GO:2000883 positive regulation of starch catabolic process	0.0461939	0	GO:0046015 regulation of transcription by glucose	0.0436716	0	GO:0019888 protein phosphatase regulator activity	0.0343461	0
GO:0030529 intracellular ribonucleoprotein complex	0.0599591	0	GO:0009277 fungal-type cell wall	0.0501226	0	GO:0045936 negative regulation of phosphate metabolic process	0.0388661	0	GO:0032545 CURI complex	0.0342987	0	GO:0019888 protein phosphatase regulator activity	0.0339705	0	GO:0043007 maintenance of rDNA	0.0332101	0	GO:0046570 methylthioribulose 1-phosphate dehydratase activity	0.0447907	0	GO:0005543 phospholipid binding	0.0296652	0	GO:0048311 mitochondrion distribution	0.031551	0	GO:0000788 nuclear nucleosome	0.0797458	0	GO:0043486 histone exchange	0.0461939	0	GO:0006616 SRP-dependent cotranslational protein targeting to membrane, translocation	0.0436716	0	GO:0071709 membrane assembly	0.0343461	0
GO:0006163 purine nucleotide metabolic process	0.0610536	0	GO:0071840 cellular component organization or biogenesis	0.0509689	0	GO:0010563 negative regulation of phosphorus metabolic process	0.0388661	0	GO:0001320 age-dependent response to reactive oxygen species involved in chronological cell aging	0.0342987	0	GO:0005675 holo TFIIH complex	0.0339705	0	GO:0046903 secretion	0.0339765	0	GO:0042083 5,10-methylenetetrahydrofolate-dependent methyltransferase activity	0.0447907	0	GO:0005740 mitochondrial envelope	0.0326816	0	GO:0042277 peptide binding	0.0324157	0	GO:0009135 purine nucleoside diphosphate metabolic process	0.0797458	0	GO:0035529 NADH pyrophosphatase activity	0.0461939	0	GO:0043328 protein targeting to vacuole involved in ubiquitin-dependent protein catabolic process via the multivesicular body sorting pathway	0.0436716	0	GO:0005402 cation:sugar symporter activity	0.0343461	0
GO:0009259 ribonucleotide metabolic process	0.0610536	0	GO:0030133 transport vesicle	0.0513527	0	GO:0051726 regulation of cell cycle	0.0390802	0	GO:0019788 NEDD8 transferase activity	0.0342987	0	GO:1903047 mitotic cell cycle process	0.0340411	0	GO:0006575 cellular modified amino acid metabolic process	0.0339765	0	GO:0019779 Atg8 activating enzyme activity	0.0447907	0	GO:0043167 ion binding	0.0347624	0	GO:0005048 signal sequence binding	0.0324157	0	GO:0005753 mitochondrial proton-transporting ATP synthase complex	0.0797458	0	GO:0035957 positive regulation of starch catabolic process by positive regulation of transcription from RNA polymerase II promoter	0.0461939	0	GO:0004252 serine-type endopeptidase activity	0.0436716	0	GO:0015203 polyamine transmembrane transporter activity	0.0343461	0
GO:0005819 spindle	0.0630243	0	GO:0030010 establishment of cell polarity	0.0513527	0	GO:0032268 regulation of cellular protein metabolic process	0.0391244	0	GO:0006784 heme a biosynthetic process	0.0342987	0	GO:0045184 establishment of protein localization	0.0359826	0	GO:0000070 mitotic sister chromatid segregation	0.0339765	0	GO:0034658 isopropylmalate transmembrane transporter activity	0.0447907	0	GO:0051345 positive regulation of hydrolase activity	0.0357678	0	GO:0017137 Rab GTPase binding	0.0324157	0	GO:0009179 purine ribonucleoside diphosphate metabolic process	0.0797458	0	GO:0001320 age-dependent response to reactive oxygen species involved in chronological cell aging	0.0461939	0	GO:1901678 iron coordination entity transport	0.049003	0	GO:0030705 cytoskeleton-dependent intracellular transport	0.0343461	0
%AA_N	0.0651582	0	GO:0065007 biological regulation	0.0513849	0	GO:0006650 glycerophospholipid metabolic process	0.0393964	0	GO:0017003 protein-heme linkage	0.0342987	0	GO:0042886 amide transport	0.0360098	0	GO:0032940 secretion by cell	0.0339765	0	GO:0015450 P-P-bond-hydrolysis-driven protein transmembrane transporter activity	0.0447907	0	GO:0034641 cellular nitrogen compound metabolic process	0.0366849	0	GO:0031267 small GTPase binding	0.0324157	0	GO:0031324 negative regulation of cellular metabolic process	0.0799355	0	GO:0070534 protein K63-linked ubiquitination	0.0461939	0	GO:0000026 alpha-1,2-mannosyltransferase activity	0.049003	0	GO:0015149 hexose transmembrane transporter activity	0.0343461	0
%AA_F	0.0673166	0	GO:0016791 phosphatase activity	0.0533639	0	GO:0050801 ion homeostasis	0.0411363	0	GO:1901575 organic substance catabolic process	0.036186	0	GO:0042626 ATPase activity, coupled to transmembrane movement of substances	0.0377622	0	%AA_W	0.0362606	0	GO:0005052 peroxisome matrix targeting signal-1 binding	0.0447907	0	GO:0033177 proton-transporting two-sector ATPase complex, proton-transporting domain	0.038732	0	GO:0017016 Ras GTPase binding	0.0324157	0	GO:0042221 response to chemical	0.0803813	0	GO:0035956 regulation of starch catabolic process by regulation of transcription from RNA polymerase II promoter	0.0461939	0	%AA_Y	0.0497378	0	GO:0032120 ascospore-type prospore membrane assembly	0.0343461	0
GO:0042278 purine nucleoside metabolic process	0.0726257	0	GO:0030011 maintenance of cell polarity	0.0533937	0	GO:0051783 regulation of nuclear division	0.0411433	0	GO:0044281 small molecule metabolic process	0.0362811	0	GO:0004521 endoribonuclease activity	0.0377622	0	GO:0006999 nuclear pore organization	0.0413463	0	GO:0017116 single-stranded DNA-dependent ATP-dependent DNA helicase activity	0.0447907	0	GO:0045259 proton-transporting ATP synthase complex	0.038732	0	GO:0005507 copper ion binding	0.0324157	0	GO:0098703 calcium ion import across plasma membrane	0.0815789	0	GO:0001405 presequence translocase-associated import motor	0.0461939	0	GO:0042578 phosphoric ester hydrolase activity	0.0505493	0	GO:0019208 phosphatase regulator activity	0.0343461	0
GO:0042123 glucanosyltransferase activity	0.0726257	0	GO:0019203 carbohydrate phosphatase activity	0.0533937	0	%AA_G	0.041788	0	GO:0044248 cellular catabolic process	0.0363294	0	GO:0016820 hydrolase activity, acting on acid anhydrides, catalyzing transmembrane movement of substances	0.0377622	0	GO:1904031 positive regulation of cyclin-dependent protein kinase activity	0.0413463	0	GO:0004605 phosphatidate cytidylyltransferase activity	0.0447907	0	GO:0000276 mitochondrial proton-transporting ATP synthase complex, coupling factor F(o)	0.038732	0	GO:0042254 ribosome biogenesis	0.0324828	0	GO:0070300 phosphatidic acid binding	0.0815789	0	GO:0060548 negative regulation of cell death	0.0461939	0	GO:0008422 beta-glucosidase activity	0.0543066	0	GO:0010628 positive regulation of gene expression	0.0352769	0
GO:0006553 lysine metabolic process	0.0726257	0	GO:0050308 sugar-phosphatase activity	0.0533937	0	GO:0022414 reproductive process	0.0420545	0	GO:0009987 cellular process	0.0363865	0	GO:0051053 negative regulation of DNA metabolic process	0.0377622	0	GO:0045732 positive regulation of protein catabolic process	0.0413463	0	GO:0099503 secretory vesicle	0.0447907	0	GO:0005753 mitochondrial proton-transporting ATP synthase complex	0.038732	0	GO:0044237 cellular metabolic process	0.0331702	0	GO:0070319 Golgi to plasma membrane transport vesicle	0.0815789	0	GO:0036095 positive regulation of invasive growth in response to glucose limitation by positive regulation of transcription from RNA polymerase II promoter	0.0461939	0	GO:0046434 organophosphate catabolic process	0.0543066	0	GO:0009059 macromolecule biosynthetic process	0.0358066	0
GO:1904659 glucose transmembrane transport	0.0726257	0	GO:0015002 heme-copper terminal oxidase activity	0.0533937	0	GO:0019725 cellular homeostasis	0.0434153	0	GO:0008150 biological_process	0.0366402	0	GO:0071705 nitrogen compound transport	0.0385763	0	GO:0006624 vacuolar protein processing	0.0413463	0	GO:1901239 malonate(1-) transmembrane transporter activity	0.0447907	0	GO:0045263 proton-transporting ATP synthase complex, coupling factor F(o)	0.038732	0	GO:0044430 cytoskeletal part	0.0336968	0	GO:0034326 butanoyltransferase activity	0.0815789	0	GO:0070762 nuclear pore transmembrane ring	0.0461939	0	GO:0006999 nuclear pore organization	0.0543066	0	GO:0016773 phosphotransferase activity, alcohol group as acceptor	0.0368739	0
GO:0009982 pseudouridine synthase activity	0.0726257	0	GO:0071627 integral component of fungal-type vacuolar membrane	0.0533937	0	GO:0009636 response to toxic substance	0.0442982	0	GO:0005575 cellular_component	0.0367755	0	GO:0006325 chromatin organization	0.0400995	0	GO:0000105 histidine biosynthetic process	0.0413463	0	GO:0032585 multivesicular body membrane	0.0447907	0	GO:0071013 catalytic step 2 spliceosome	0.0389426	0	GO:0000313 organellar ribosome	0.0339112	0	GO:0006148 inosine catabolic process	0.0815789	0	GO:2000906 positive regulation of starch metabolic process	0.0461939	0	GO:0051258 protein polymerization	0.0543066	0	GO:0044262 cellular carbohydrate metabolic process	0.0368888	0
GO:0005788 endoplasmic reticulum lumen	0.0726257	0	GO:0043457 regulation of cellular respiration	0.0533937	0	GO:0016810 hydrolase activity, acting on carbon-nitrogen (but not peptide) bonds	0.0455332	0	GO:1904029 regulation of cyclin-dependent protein kinase activity	0.0375349	0	GO:0070727 cellular macromolecule localization	0.0402474	0	GO:1905269 positive regulation of chromatin organization	0.0413463	0	GO:0047938 glucose-6-phosphate 1-epimerase activity	0.0447907	0	GO:0016298 lipase activity	0.0389426	0	GO:0009150 purine ribonucleotide metabolic process	0.0339112	0	GO:0016751 S-succinyltransferase activity	0.0815789	0	GO:0043069 negative regulation of programmed cell death	0.0461939	0	GO:0006613 cotranslational protein targeting to membrane	0.0595824	0	GO:0034645 cellular macromolecule biosynthetic process	0.0369614	0
GO:0006772 thiamine metabolic process	0.0726257	0	GO:0031166 integral component of vacuolar membrane	0.0533937	0	GO:0016491 oxidoreductase activity	0.046378	0	GO:0016651 oxidoreductase activity, acting on NAD(P)H	0.0375349	0	GO:0006310 DNA recombination	0.0419722	0	GO:0052803 imidazole-containing compound metabolic process	0.0413463	0	GO:0051117 ATPase binding	0.0447907	0	Num_AAChanges	0.039444	0	GO:0009161 ribonucleoside monophosphate metabolic process	0.0339112	0	GO:0046711 GDP biosynthetic process	0.0815789	0	GO:0005786 signal recognition particle, endoplasmic reticulum targeting	0.0461939	0	GO:0008236 serine-type peptidase activity	0.0595824	0	GO:0006259 DNA metabolic process	0.0377386	0
GO:0005402 cation:sugar symporter activity	0.0726257	0	GO:0009314 response to radiation	0.0533937	0	GO:0055114 oxidation-reduction process	0.0465149	0	GO:0001077 transcriptional activator activity, RNA polymerase II core promoter proximal region sequence-specific binding	0.0414971	0	GO:0008104 protein localization	0.0439793	0	GO:0006547 histidine metabolic process	0.0413463	0	GO:0042555 MCM complex	0.0447907	0	SNP-MODERATE	0.03951	0	GO:0005761 mitochondrial ribosome	0.0339112	0	GO:0009051 pentose-phosphate shunt, oxidative branch	0.0815789	0	GO:2000881 regulation of starch catabolic process	0.0461939	0	GO:0006614 SRP-dependent cotranslational protein targeting to membrane	0.0595824	0	GO:0060255 regulation of macromolecule metabolic process	0.0380334	0
GO:0046128 purine ribonucleoside metabolic process	0.0726257	0	GO:0016675 oxidoreductase activity, acting on a heme group of donors	0.0533937	0	5UTR_PARS_RNAstructure	0.0467878	0	GO:0045324 late endosome to vacuole transport	0.0414971	0	GO:0070192 chromosome organization involved in meiotic cell cycle	0.044791	0	GO:0003774 motor activity	0.0413463	0	GO:0004799 thymidylate synthase activity	0.0447907	0	GO:0097367 carbohydrate derivative binding	0.0400448	0	GO:0006163 purine nucleotide metabolic process	0.0339112	0	GO:0044715 8-oxo-dGDP phosphatase activity	0.0815789	0	GO:0016882 cyclo-ligase activity	0.0461939	0	GO:0070784 regulation of growth of unicellular organism as a thread of attached cells	0.0595824	0	GO:0050794 regulation of cellular process	0.0390476	0
GO:0051119 sugar transmembrane transporter activity	0.0726257	0	GO:0004129 cytochrome-c oxidase activity	0.0533937	0	GO:0010564 regulation of cell cycle process	0.0470851	0	GO:0043620 regulation of DNA-templated transcription in response to stress	0.0456098	0	GO:0043094 cellular metabolic compound salvage	0.044791	0	GO:0009395 phospholipid catabolic process	0.0413463	0	GO:0005092 GDP-dissociation inhibitor activity	0.0447907	0	GO:0032553 ribonucleotide binding	0.0400448	0	GO:1901576 organic substance biosynthetic process	0.0349842	0	GO:0033182 regulation of histone ubiquitination	0.0815789	0	GO:0000800 lateral element	0.0461939	0	GO:0017056 structural constituent of nuclear pore	0.0648307	0	GO:0050789 regulation of biological process	0.0423509	0
GO:0005487 nucleocytoplasmic transporter activity	0.0726257	0	GO:0031310 intrinsic component of vacuolar membrane	0.0533937	0	GO:0055072 iron ion homeostasis	0.0488843	0	GO:0043618 regulation of transcription from RNA polymerase II promoter in response to stress	0.0456098	0	GO:0032392 DNA geometric change	0.044791	0	GO:0017056 structural constituent of nuclear pore	0.0413463	0	GO:0000268 peroxisome targeting sequence binding	0.0447907	0	GO:0043168 anion binding	0.0401162	0	GO:0003924 GTPase activity	0.0363693	0	GO:0043892 methylglyoxal reductase (NADPH-dependent) activity	0.0815789	0	GO:0051666 actin cortical patch localization	0.0461939	0	GO:0043162 ubiquitin-dependent protein catabolic process via the multivesicular body sorting pathway	0.0648307	0	GO:2001141 regulation of RNA biosynthetic process	0.0433346	0
GO:0015295 solute:proton symporter activity	0.0726257	0	GO:1904949 ATPase complex	0.0533937	0	GO:0018393 internal peptidyl-lysine acetylation	0.0488843	0	GO:0016197 endosomal transport	0.0461486	0	GO:0006270 DNA replication initiation	0.044791	0	GO:0031058 positive regulation of histone modification	0.0413463	0	GO:0070319 Golgi to plasma membrane transport vesicle	0.0447907	0	GO:0031975 envelope	0.040989	0	GO:0005732 small nucleolar ribonucleoprotein complex	0.0366332	0	GO:0008617 guanosine metabolic process	0.0815789	0	GO:0051731 polynucleotide 5'-hydroxyl-kinase activity	0.0461939	0	GO:0010243 response to organonitrogen compound	0.0648307	0	GO:1903506 regulation of nucleic acid-templated transcription	0.0433346	0
GO:0005351 sugar:proton symporter activity	0.0726257	0	GO:0016661 oxidoreductase activity, acting on other nitrogenous compounds as donors	0.0533937	0	GO:0016485 protein processing	0.0488843	0	GO:1901564 organonitrogen compound metabolic process	0.0487194	0	GO:0043168 anion binding	0.0448142	0	GO:0046461 neutral lipid catabolic process	0.0413463	0	GO:0034659 isopropylmalate transport	0.0447907	0	GO:0031967 organelle envelope	0.040989	0	GO:0032879 regulation of localization	0.0378641	0	GO:0033107 CVT vesicle	0.0815789	0	GO:0015173 aromatic amino acid transmembrane transporter activity	0.0461939	0	GO:0001101 response to acid chemical	0.0700514	0	GO:0006355 regulation of transcription, DNA-templated	0.0433346	0
GO:0015294 solute:cation symporter activity	0.0726257	0	GO:0016676 oxidoreductase activity, acting on a heme group of donors, oxygen as acceptor	0.0533937	0	GO:0006475 internal protein amino acid acetylation	0.0488843	0	GO:0040008 regulation of growth	0.049867	0	GO:0000725 recombinational repair	0.0457569	0	GO:0000462 maturation of SSU-rRNA from tricistronic rRNA transcript (SSU-rRNA, 5.8S rRNA, LSU-rRNA)	0.0414654	0	GO:0089713 Cbf1-Met4-Met28 complex	0.0447907	0	GO:0022607 cellular component assembly	0.0413729	0	GO:0099081 supramolecular polymer	0.0381235	0	GO:0008142 oxysterol binding	0.0815789	0	GO:0016843 amine-lyase activity	0.0461939	0	GO:0017171 serine hydrolase activity	0.0752449	0	GO:0005657 replication fork	0.0454234	0
GO:0005355 glucose transmembrane transporter activity	0.0726257	0	GO:0071628 intrinsic component of fungal-type vacuolar membrane	0.0533937	0	GO:0008080 N-acetyltransferase activity	0.0488843	0	GO:0009058 biosynthetic process	0.0504675	0	GO:0008608 attachment of spindle microtubules to kinetochore	0.045992	0	GO:0046983 protein dimerization activity	0.0434276	0	GO:0031253 cell projection membrane	0.0447907	0	GO:0001932 regulation of protein phosphorylation	0.043472	0	GO:0099080 supramolecular complex	0.0381235	0	GO:0008381 mechanically-gated ion channel activity	0.0815789	0	GO:0004359 glutaminase activity	0.0461939	0	GO:1901698 response to nitrogen compound	0.0752449	0	GO:0015295 solute:proton symporter activity	0.046494	0
GO:0098562 cytoplasmic side of membrane	0.0726257	0	physical_association	0.0544489	0	GO:0018394 peptidyl-lysine acetylation	0.0488843	0	GO:0036091 positive regulation of transcription from RNA polymerase II promoter in response to oxidative stress	0.0510143	0	GO:0004298 threonine-type endopeptidase activity	0.045992	0	GO:0010008 endosome membrane	0.0454245	0	GO:0033309 SBF transcription complex	0.0447907	0	GO:0030476 ascospore wall assembly	0.0463329	0	GO:0099512 supramolecular fiber	0.0381235	0	GO:0098659 inorganic cation import across plasma membrane	0.0815789	0	GO:0051260 protein homooligomerization	0.0461939	0	GO:0055088 lipid homeostasis	0.0752449	0	GO:0015294 solute:cation symporter activity	0.046494	0
GO:0015149 hexose transmembrane transporter activity	0.0726257	0	GO:0044702 single organism reproductive process	0.0551633	0	GO:0031305 integral component of mitochondrial inner membrane	0.0507408	0	GO:0019401 alditol biosynthetic process	0.0510143	0	GO:0046961 proton-transporting ATPase activity, rotational mechanism	0.045992	0	GO:0016043 cellular component organization	0.0457488	0	GO:0098590 plasma membrane region	0.0447907	0	GO:0070726 cell wall assembly	0.0463329	0	GO:0005819 spindle	0.0381235	0	GO:0004605 phosphatidate cytidylyltransferase activity	0.0815789	0	GO:0036381 pyridoxal 5'-phosphate synthase (glutamine hydrolysing) activity	0.0461939	0	GO:0000272 polysaccharide catabolic process	0.0752449	0	GO:0007097 nuclear migration	0.046494	0
GO:0042124 1,3-beta-glucanosyltransferase activity	0.0726257	0	GO:0046390 ribose phosphate biosynthetic process	0.0560403	0	GO:0016684 oxidoreductase activity, acting on peroxide as acceptor	0.0507408	0	GO:0051046 regulation of secretion	0.0510143	0	GO:0036442 hydrogen-exporting ATPase activity	0.045992	0	GO:0008152 metabolic process	0.0472903	0	GO:0000159 protein phosphatase type 2A complex	0.0447907	0	GO:0008237 metallopeptidase activity	0.0463329	0	GO:0099513 polymeric cytoskeletal fiber	0.0381235	0	GO:0004408 holocytochrome-c synthase activity	0.0815789	0	GO:0051654 establishment of mitochondrion localization	0.0461939	0	GO:0008017 microtubule binding	0.0804111	0	GO:1903293 phosphatase complex	0.046494	0
GO:0035428 hexose transmembrane transport	0.0726257	0	GO:0031400 negative regulation of protein modification process	0.0560403	0	GO:0004601 peroxidase activity	0.0507408	0	GO:0000196 MAPK cascade involved in cell wall organization or biogenesis	0.0510143	0	GO:0010499 proteasomal ubiquitin-independent protein catabolic process	0.045992	0	GO:0043623 cellular protein complex assembly	0.0493303	0	GO:0051775 response to redox state	0.0447907	0	GO:0042244 spore wall assembly	0.0463329	0	GO:0015630 microtubule cytoskeleton	0.0383354	0	GO:0046568 3-methylbutanol:NAD(P) oxidoreductase activity	0.0815789	0	GO:0005302 L-tyrosine transmembrane transporter activity	0.0461939	0	GO:0031314 extrinsic component of mitochondrial inner membrane	0.0804111	0	GO:0000741 karyogamy	0.046494	0
GO:0015145 monosaccharide transmembrane transporter activity	0.0726257	0	GO:0009123 nucleoside monophosphate metabolic process	0.0569254	0	GO:0044273 sulfur compound catabolic process	0.0522152	0	GO:0050308 sugar-phosphatase activity	0.0510143	0	GO:0019208 phosphatase regulator activity	0.045992	0	GO:0016646 oxidoreductase activity, acting on the CH-NH group of donors, NAD or NADP as acceptor	0.0494169	0	GO:1900423 positive regulation of mating type switching by positive regulation of transcription from RNA polymerase II promoter	0.0447907	0	GO:0070590 spore wall biogenesis	0.0463329	0	GO:0009117 nucleotide metabolic process	0.038656	0	GO:0098739 import across plasma membrane	0.0815789	0	GO:0016530 metallochaperone activity	0.0461939	0	GO:0009986 cell surface	0.0804111	0	GO:0000272 polysaccharide catabolic process	0.046494	0
GO:0031399 regulation of protein modification process	0.0728762	0	GO:0044767 single-organism developmental process	0.0571638	0	GO:0000171 ribonuclease MRP activity	0.0522152	0	GO:0001315 age-dependent response to reactive oxygen species	0.0510143	0	GO:0045121 membrane raft	0.045992	0	GO:0031398 positive regulation of protein ubiquitination	0.0494169	0	GO:0050789 regulation of biological process	0.0453723	0	GO:0071940 fungal-type cell wall assembly	0.0463329	0	GO:0006753 nucleoside phosphate metabolic process	0.0388902	0	GO:0033677 DNA/RNA helicase activity	0.0815789	0	GO:0048500 signal recognition particle	0.0461939	0	GO:0030148 sphingolipid biosynthetic process	0.0804111	0	GO:0070784 regulation of growth of unicellular organism as a thread of attached cells	0.046494	0
GO:1902652 secondary alcohol metabolic process	0.0731741	0	GO:0032502 developmental process	0.0571638	0	GO:0016840 carbon-nitrogen lyase activity	0.0522152	0	GO:2000219 positive regulation of invasive growth in response to glucose limitation	0.0510143	0	GO:0016814 hydrolase activity, acting on carbon-nitrogen (but not peptide) bonds, in cyclic amidines	0.045992	0	GO:0045862 positive regulation of proteolysis	0.0494169	0	physical_association	0.0463748	0	GO:0070591 ascospore wall biogenesis	0.0463329	0	GO:0016887 ATPase activity	0.0390679	0	GO:0009164 nucleoside catabolic process	0.0815789	0	GO:0034476 U5 snRNA 3'-end processing	0.0461939	0	GO:1900428 regulation of filamentous growth of a population of unicellular organisms	0.0804111	0	GO:0009303 rRNA transcription	0.046494	0
GO:0008643 carbohydrate transport	0.0731741	0	GO:0006893 Golgi to plasma membrane transport	0.0589908	0	GO:0045740 positive regulation of DNA replication	0.0522152	0	GO:0048255 mRNA stabilization	0.0510143	0	GO:0034085 establishment of sister chromatid cohesion	0.045992	0	GO:0031056 regulation of histone modification	0.0494169	0	GO:0003678 DNA helicase activity	0.0465956	0	GO:0098800 inner mitochondrial membrane protein complex	0.046386	0	GO:0003824 catalytic activity	0.0394961	0	GO:0018455 alcohol dehydrogenase [NAD(P)+] activity	0.0815789	0	GO:0008614 pyridoxine metabolic process	0.0461939	0	GO:0007029 endoplasmic reticulum organization	0.0855503	0	GO:0008287 protein serine/threonine phosphatase complex	0.046494	0
GO:0060968 regulation of gene silencing	0.0731741	0	GO:0000727 double-strand break repair via break-induced replication	0.0589908	0	GO:2000105 positive regulation of DNA-dependent DNA replication	0.0522152	0	GO:0043489 RNA stabilization	0.0510143	0	GO:0045899 positive regulation of RNA polymerase II transcriptional preinitiation complex assembly	0.045992	0	GO:0004620 phospholipase activity	0.0494169	0	GO:0004364 glutathione transferase activity	0.0465956	0	GO:0005524 ATP binding	0.0484979	0	GO:0072521 purine-containing compound metabolic process	0.0398211	0	GO:0004414 homoserine O-acetyltransferase activity	0.0815789	0	GO:0015828 tyrosine transport	0.0461939	0	GO:0010570 regulation of filamentous growth	0.0906625	0	GO:0040023 establishment of nucleus localization	0.046494	0
GO:0030176 integral component of endoplasmic reticulum membrane	0.0733488	0	GO:0098876 vesicle-mediated transport to the plasma membrane	0.0589908	0	GO:0019201 nucleotide kinase activity	0.0522152	0	GO:0016670 oxidoreductase activity, acting on a sulfur group of donors, oxygen as acceptor	0.0510143	0	GO:0007051 spindle organization	0.045992	0	GO:0051293 establishment of spindle localization	0.0494169	0	GO:0006575 cellular modified amino acid metabolic process	0.0469779	0	GO:0032559 adenyl ribonucleotide binding	0.0484979	0	GO:0006807 nitrogen compound metabolic process	0.0403275	0	GO:0046710 GDP metabolic process	0.0815789	0	GO:0015801 aromatic amino acid transport	0.0461939	0	GO:0015631 tubulin binding	0.0957479	0	GO:0031321 ascospore-type prospore assembly	0.046494	0
GO:0006081 cellular aldehyde metabolic process	0.0733488	0	GO:0009260 ribonucleotide biosynthetic process	0.0606142	0	GO:0042182 ketone catabolic process	0.0522152	0	GO:0016972 thiol oxidase activity	0.0510143	0	GO:0070003 threonine-type peptidase activity	0.045992	0	GO:0045899 positive regulation of RNA polymerase II transcriptional preinitiation complex assembly	0.0494169	0	GO:0008654 phospholipid biosynthetic process	0.0469779	0	GO:0030554 adenyl nucleotide binding	0.0486198	0	GO:0034660 ncRNA metabolic process	0.0449175	0	GO:0034319 alcohol O-butanoyltransferase activity	0.0815789	0	GO:0006449 regulation of translational termination	0.0461939	0	GO:0032511 late endosome to vacuole transport via multivesicular body sorting pathway	0.0957479	0	GO:0051647 nucleus localization	0.046494	0
GO:0031227 intrinsic component of endoplasmic reticulum membrane	0.0733488	0	GO:0009127 purine nucleoside monophosphate biosynthetic process	0.0609937	0	GO:0006873 cellular ion homeostasis	0.0526021	0	GO:0036265 RNA (guanine-N7)-methylation	0.0510143	0	GO:0005839 proteasome core complex	0.045992	0	GO:0040001 establishment of mitotic spindle localization	0.0494169	0	GO:0005634 nucleus	0.0493022	0	GO:0044249 cellular biosynthetic process	0.0505739	0	%Beta-sheet	0.0465734	0	GO:0005953 CAAX-protein geranylgeranyltransferase complex	0.0815789	0	GO:2000904 regulation of starch metabolic process	0.0461939	0	GO:0000429 carbon catabolite regulation of transcription from RNA polymerase II promoter	0.0957479	0	GO:0006928 movement of cell or subcellular component	0.046494	0
GO:0042254 ribosome biogenesis	0.0741578	0	GO:0009168 purine ribonucleoside monophosphate biosynthetic process	0.0609937	0	GO:1905368 peptidase complex	0.0526021	0	GO:0017157 regulation of exocytosis	0.0510143	0	GO:0019344 cysteine biosynthetic process	0.045992	0	GO:0006638 neutral lipid metabolic process	0.0494169	0	GO:0043168 anion binding	0.049983	0	GO:0048869 cellular developmental process	0.0511003	0	GO:0006139 nucleobase-containing compound metabolic process	0.0472163	0	GO:0006847 plasma membrane acetate transport	0.0815789	0	GO:1903600 glutaminase complex	0.0461939	0	GO:0008361 regulation of cell size	0.0957479	0	GO:0090087 regulation of peptide transport	0.046494	0
GO:0031226 intrinsic component of plasma membrane	0.076647	0	GO:0071011 precatalytic spliceosome	0.0609937	0	GO:0044764 multi-organism cellular process	0.056161	0	GO:0060236 regulation of mitotic spindle organization	0.0510143	0	GO:0007052 mitotic spindle organization	0.045992	0	GO:0004806 triglyceride lipase activity	0.0494169	0	GO:0009055 electron carrier activity	0.0500892	0	GO:0044767 single-organism developmental process	0.0511003	0	GO:0000749 response to pheromone involved in conjugation with cellular fusion	0.0474601	0	GO:0071108 protein K48-linked deubiquitination	0.0815789	0	GO:0072687 meiotic spindle	0.0461939	0	GO:0071944 cell periphery	0.0981054	0	%AA_G	0.0465541	0
GO:0051594 detection of glucose	0.0774264	0	GO:0032543 mitochondrial translation	0.0621005	0	GO:0000819 sister chromatid segregation	0.056161	0	GO:0043527 tRNA methyltransferase complex	0.0510143	0	GO:0019363 pyridine nucleotide biosynthetic process	0.045992	0	GO:0051653 spindle localization	0.0494169	0	%AA_N	0.0549635	0	GO:0032502 developmental process	0.0511003	0	GO:0017004 cytochrome complex assembly	0.0474601	0	GO:0016748 succinyltransferase activity	0.0815789	0	GO:0072353 cellular age-dependent response to reactive oxygen species	0.0461939	0	GO:0045990 carbon catabolite regulation of transcription	0.100807	0	GO:0005576 extracellular region	0.0466428	0
GO:0048487 beta-tubulin binding	0.0774264	0	%AA_S	0.062414	0	GO:2000241 regulation of reproductive process	0.0586148	0	GO:1903530 regulation of secretion by cell	0.0510143	0	GO:0098857 membrane microdomain	0.045992	0	GO:0042219 cellular modified amino acid catabolic process	0.0494169	0	GO:0050794 regulation of cellular process	0.0556388	0	GO:1901361 organic cyclic compound catabolic process	0.0523064	0	GO:0006725 cellular aromatic compound metabolic process	0.0481649	0	GO:0017003 protein-heme linkage	0.0815789	0	GO:0046519 sphingoid metabolic process	0.0461939	0	GO:0015926 glucosidase activity	0.100807	0	GO:0051254 positive regulation of RNA metabolic process	0.0497962	0
GO:0046711 GDP biosynthetic process	0.0774264	0	GO:0017111 nucleoside-triphosphatase activity	0.0636346	0	GO:0099081 supramolecular polymer	0.0586175	0	GO:0000707 meiotic DNA recombinase assembly	0.0510143	0	GO:0044273 sulfur compound catabolic process	0.045992	0	GO:0016814 hydrolase activity, acting on carbon-nitrogen (but not peptide) bonds, in cyclic amidines	0.0494169	0	GO:0065007 biological regulation	0.0560944	0	GO:1905038 regulation of membrane lipid metabolic process	0.0527397	0	GO:0048856 anatomical structure development	0.0482297	0	GO:0045471 response to ethanol	0.0815789	0	GO:0044765 single-organism transport	0.0487564	0	GO:0045047 protein targeting to ER	0.105839	0	GO:0019219 regulation of nucleobase-containing compound metabolic process	0.0509494	0
GO:0015146 pentose transmembrane transporter activity	0.0774264	0	GO:0008324 cation transmembrane transporter activity	0.064888	0	GO:0099513 polymeric cytoskeletal fiber	0.0586175	0	GO:0015248 sterol transporter activity	0.0510143	0	GO:1903046 meiotic cell cycle process	0.0471243	0	GO:0046654 tetrahydrofolate biosynthetic process	0.0494169	0	GO:0031298 replication fork protection complex	0.0581935	0	GO:0004359 glutaminase activity	0.0527397	0	GO:0009653 anatomical structure morphogenesis	0.0482297	0	GO:0034338 short-chain carboxylesterase activity	0.0815789	0	%Helical	0.0510433	0	GO:0032509 endosome transport via multivesicular body sorting pathway	0.105839	0	GO:0071944 cell periphery	0.0509494	0
GO:0002791 regulation of peptide secretion	0.0774264	0	GO:0000398 mRNA splicing, via spliceosome	0.0663513	0	GO:0099080 supramolecular complex	0.0586175	0	GO:0006114 glycerol biosynthetic process	0.0510143	0	GO:0015031 protein transport	0.0494926	0	geneLen	0.0501217	0	GO:0006520 cellular amino acid metabolic process	0.0589179	0	GO:0036381 pyridoxal 5'-phosphate synthase (glutamine hydrolysing) activity	0.0527397	0	GO:0016021 integral component of membrane	0.0487586	0	GO:0051792 medium-chain fatty acid biosynthetic process	0.0815789	0	GO:0051186 cofactor metabolic process	0.0515092	0	GO:0071852 fungal-type cell wall organization or biogenesis	0.108162	0	GO:1900479 positive regulation of flocculation via cell wall protein-carbohydrate interaction	0.0514829	0
GO:0002940 tRNA N2-guanine methylation	0.0774264	0	GO:0000377 RNA splicing, via transesterification reactions with bulged adenosine as nucleophile	0.0663513	0	GO:0044463 cell projection part	0.0586175	0	GO:0050821 protein stabilization	0.0510143	0	GO:0015833 peptide transport	0.0500667	0	CDS_PARS_RNAstructure	0.0504828	0	GO:0043161 proteasome-mediated ubiquitin-dependent protein catabolic process	0.0605393	0	GO:0008250 oligosaccharyltransferase complex	0.0527397	0	GO:0046483 heterocycle metabolic process	0.0488674	0	GO:0071036 nuclear polyadenylation-dependent snoRNA catabolic process	0.0815789	0	GO:0006470 protein dephosphorylation	0.0544105	0	GO:0031312 extrinsic component of organelle membrane	0.110845	0	GO:0034397 telomere localization	0.0514829	0
GO:0000997 mitochondrial RNA polymerase core promoter sequence-specific DNA binding	0.0774264	0	GO:0000003 reproduction	0.066949	0	GO:0043332 mating projection tip	0.0586175	0	GO:0010695 regulation of spindle pole body separation	0.0510143	0	GO:0097367 carbohydrate derivative binding	0.0504469	0	GO:0002181 cytoplasmic translation	0.0516163	0	GO:0010498 proteasomal protein catabolic process	0.0605393	0	GO:0042597 periplasmic space	0.0527397	0	GO:0019985 translesion synthesis	0.0488788	0	GO:0033184 positive regulation of histone ubiquitination	0.0815789	0	GO:0006811 ion transport	0.054925	0	GO:0040008 regulation of growth	0.110845	0	GO:0009730 detection of carbohydrate stimulus	0.0514829	0
GO:0009230 thiamine catabolic process	0.0774264	0	GO:0000375 RNA splicing, via transesterification reactions	0.0672515	0	GO:0099512 supramolecular fiber	0.0586175	0	GO:0044247 cellular polysaccharide catabolic process	0.0510143	0	GO:0047623 adenosine-phosphate deaminase activity	0.0511559	0	GO:0006518 peptide metabolic process	0.0521809	0	GO:0006497 protein lipidation	0.064492	0	GO:0019568 arabinose catabolic process	0.0527397	0	GO:0001056 RNA polymerase III activity	0.0488788	0	GO:0031428 box C/D snoRNP complex	0.0815789	0	GO:0044429 mitochondrial part	0.0553423	0	GO:0072599 establishment of protein localization to endoplasmic reticulum	0.110845	0	GO:0035511 oxidative DNA demethylation	0.0514829	0
GO:0001089 transcription factor activity, TFIIF-class transcription factor binding	0.0774264	0	GO:0045935 positive regulation of nucleobase-containing compound metabolic process	0.0679227	0	GO:0065008 regulation of biological quality	0.0587001	0	GO:0010696 positive regulation of spindle pole body separation	0.0510143	0	GO:0007116 regulation of cell budding	0.0511559	0	GO:0030490 maturation of SSU-rRNA	0.0537452	0	GO:0098869 cellular oxidant detoxification	0.064492	0	GO:0019566 arabinose metabolic process	0.0527397	0	GO:0030117 membrane coat	0.0488788	0	GO:0016602 CCAAT-binding factor complex	0.0815789	0	GO:0016757 transferase activity, transferring glycosyl groups	0.0623774	0	GO:0048878 chemical homeostasis	0.115374	0	GO:0045894 negative regulation of mating-type specific transcription, DNA-templated	0.0514829	0
GO:0051606 detection of stimulus	0.0774264	0	GO:0051503 adenine nucleotide transport	0.0701845	0	GO:0071444 cellular response to pheromone	0.0601449	0	GO:0071561 nucleus-vacuole junction	0.0510143	0	GO:0000252 C-3 sterol dehydrogenase (C-4 sterol decarboxylase) activity	0.0511559	0	GO:0065003 macromolecular complex assembly	0.0554699	0	GO:0046474 glycerophospholipid biosynthetic process	0.064492	0	GO:0035308 negative regulation of protein dephosphorylation	0.0527397	0	GO:0000722 telomere maintenance via recombination	0.0488788	0	GO:0000421 autophagosome membrane	0.0815789	0	GO:0000989 transcription factor activity, transcription factor binding	0.0629608	0	GO:0045324 late endosome to vacuole transport	0.115824	0	GO:1901656 glycoside transport	0.0514829	0
GO:0046099 guanine biosynthetic process	0.0774264	0	GO:0015868 purine ribonucleotide transport	0.0701845	0	GO:0018205 peptidyl-lysine modification	0.0618073	0	GO:0043457 regulation of cellular respiration	0.0510143	0	GO:1901337 thioester transport	0.0511559	0	GO:0043254 regulation of protein complex assembly	0.0559055	0	GO:0016209 antioxidant activity	0.064492	0	GO:0090153 regulation of sphingolipid biosynthetic process	0.0527397	0	GO:0005666 DNA-directed RNA polymerase III complex	0.0488788	0	GO:0034323 O-butanoyltransferase activity	0.0815789	0	GO:0051082 unfolded protein binding	0.0640099	0	GO:1901575 organic substance catabolic process	0.118148	0	GO:0031390 Ctf18 RFC-like complex	0.0514829	0
GO:1902269 positive regulation of polyamine transmembrane transport	0.0774264	0	GO:1900542 regulation of purine nucleotide metabolic process	0.0701845	0	GO:0070785 negative regulation of growth of unicellular organism as a thread of attached cells	0.0638471	0	GO:0016667 oxidoreductase activity, acting on a sulfur group of donors	0.0587908	0	GO:0042725 thiamine-containing compound catabolic process	0.0511559	0	GO:0000819 sister chromatid segregation	0.0559055	0	GO:0042158 lipoprotein biosynthetic process	0.064492	0	GO:0042843 D-xylose catabolic process	0.0527397	0	GO:0031298 replication fork protection complex	0.0488788	0	GO:0071361 cellular response to ethanol	0.0815789	0	GO:0033617 mitochondrial respiratory chain complex IV assembly	0.0659084	0	GO:0000002 mitochondrial genome maintenance	0.120778	0	GO:0035956 regulation of starch catabolic process by regulation of transcription from RNA polymerase II promoter	0.0514829	0
GO:0047536 2-aminoadipate transaminase activity	0.0774264	0	GO:0070847 core mediator complex	0.0701845	0	GO:1903600 glutaminase complex	0.0638471	0	GO:0001228 transcriptional activator activity, RNA polymerase II transcription regulatory region sequence-specific binding	0.0587908	0	GO:0070875 positive regulation of glycogen metabolic process	0.0511559	0	GO:0048284 organelle fusion	0.0559055	0	%Helical	0.0654074	0	GO:1903600 glutaminase complex	0.0527397	0	GO:0009132 nucleoside diphosphate metabolic process	0.0488788	0	GO:0017006 protein-tetrapyrrole linkage	0.0815789	0	GO:0016705 oxidoreductase activity, acting on paired donors, with incorporation or reduction of molecular oxygen	0.0699442	0	GO:0005643 nuclear pore	0.125705	0	GO:0045141 meiotic telomere clustering	0.0514829	0
GO:0071049 nuclear retention of pre-mRNA with aberrant 3'-ends at the site of transcription	0.0774264	0	GO:0043470 regulation of carbohydrate catabolic process	0.0701845	0	GO:0030127 COPII vesicle coat	0.0638471	0	GO:0000329 fungal-type vacuole membrane	0.0592038	0	GO:0008972 phosphomethylpyrimidine kinase activity	0.0511559	0	GO:0007018 microtubule-based movement	0.0574226	0	GO:1901265 nucleoside phosphate binding	0.0666047	0	GO:0004197 cysteine-type endopeptidase activity	0.0527397	0	GO:0048475 coated membrane	0.0488788	0	GO:0042436 indole-containing compound catabolic process	0.0815789	0	GO:0043601 nuclear replisome	0.0699442	0	GO:0031304 intrinsic component of mitochondrial inner membrane	0.125705	0	GO:0046834 lipid phosphorylation	0.0514829	0
GO:0008870 galactoside O-acetyltransferase activity	0.0774264	0	GO:0016592 mediator complex	0.0701845	0	GO:0000372 Group I intron splicing	0.0638471	0	GO:0045944 positive regulation of transcription from RNA polymerase II promoter	0.0601941	0	GO:0042365 water-soluble vitamin catabolic process	0.0511559	0	GO:1903362 regulation of cellular protein catabolic process	0.0574226	0	GO:0000166 nucleotide binding	0.0666047	0	GO:0004032 alditol:NADP+ 1-oxidoreductase activity	0.0527397	0	GO:0051188 cofactor biosynthetic process	0.0490283	0	GO:0016076 snRNA catabolic process	0.0815789	0	GO:0006778 porphyrin-containing compound metabolic process	0.0699442	0	GO:0007584 response to nutrient	0.130606	0	GO:0072387 flavin adenine dinucleotide metabolic process	0.0514829	0
GO:0015578 mannose transmembrane transporter activity	0.0774264	0	GO:0015918 sterol transport	0.0701845	0	GO:0031573 intra-S DNA damage checkpoint	0.0638471	0	GO:0065009 regulation of molecular function	0.0602063	0	GO:0016314 phosphatidylinositol-3,4,5-trisphosphate 3-phosphatase activity	0.0511559	0	GO:0061136 regulation of proteasomal protein catabolic process	0.0574226	0	GO:0044445 cytosolic part	0.0698939	0	GO:0008614 pyridoxine metabolic process	0.0527397	0	GO:0032786 positive regulation of DNA-templated transcription, elongation	0.0493143	0	GO:0007204 positive regulation of cytosolic calcium ion concentration	0.0815789	0	GO:0033865 nucleoside bisphosphate metabolic process	0.0699442	0	GO:0031670 cellular response to nutrient	0.130606	0	GO:0007050 cell cycle arrest	0.0514829	0
GO:0033540 fatty acid beta-oxidation using acyl-CoA oxidase	0.0774264	0	GO:0016877 ligase activity, forming carbon-sulfur bonds	0.0701845	0	GO:0034723 DNA replication-dependent nucleosome organization	0.0638471	0	GO:0098852 lytic vacuole membrane	0.0612944	0	GO:0003934 GTP cyclohydrolase I activity	0.0511559	0	GO:0072384 organelle transport along microtubule	0.0574226	0	GO:0031902 late endosome membrane	0.0706668	0	GO:0035305 negative regulation of dephosphorylation	0.0527397	0	GO:0032784 regulation of DNA-templated transcription, elongation	0.0493143	0	GO:0061410 positive regulation of transcription from RNA polymerase II promoter in response to ethanol	0.0815789	0	GO:0032881 regulation of polysaccharide metabolic process	0.0699442	0	GO:0006665 sphingolipid metabolic process	0.130606	0	GO:0035950 regulation of oligopeptide transport by regulation of transcription from RNA polymerase II promoter	0.0514829	0
GO:0009593 detection of chemical stimulus	0.0774264	0	GO:0015865 purine nucleotide transport	0.0701845	0	GO:0071468 cellular response to acidic pH	0.0638471	0	GO:0004784 superoxide dismutase activity	0.0674469	0	GO:0008902 hydroxymethylpyrimidine kinase activity	0.0511559	0	GO:0070682 proteasome regulatory particle assembly	0.0574226	0	GO:0032508 DNA duplex unwinding	0.0706668	0	GO:0016843 amine-lyase activity	0.0527397	0	GO:0000131 incipient cellular bud site	0.0493143	0	GO:0019474 L-lysine catabolic process to acetyl-CoA	0.0815789	0	GO:0033313 meiotic cell cycle checkpoint	0.0699442	0	GO:0005773 vacuole	0.131604	0	GO:2000881 regulation of starch catabolic process	0.0514829	0
GO:0016433 rRNA (adenine) methyltransferase activity	0.0774264	0	GO:0007096 regulation of exit from mitosis	0.0701845	0	GO:0004026 alcohol O-acetyltransferase activity	0.0638471	0	GO:0032366 intracellular sterol transport	0.0674469	0	GO:0033619 membrane protein proteolysis	0.0511559	0	GO:0030473 nuclear migration along microtubule	0.0574226	0	GO:0002098 tRNA wobble uridine modification	0.0706668	0	GO:0090305 nucleic acid phosphodiester bond hydrolysis	0.0530622	0	GO:0034243 regulation of transcription elongation from RNA polymerase II promoter	0.0493143	0	GO:0030126 COPI vesicle coat	0.0815789	0	GO:0043471 regulation of cellular carbohydrate catabolic process	0.0699442	0	GO:0080135 regulation of cellular response to stress	0.135482	0	GO:0045488 pectin metabolic process	0.0514829	0
GO:0052642 lysophosphatidic acid phosphatase activity	0.0774264	0	GO:0005840 ribosome	0.0712875	0	GO:0045950 negative regulation of mitotic recombination	0.0638471	0	GO:0043619 regulation of transcription from RNA polymerase II promoter in response to oxidative stress	0.0674469	0	GO:0009820 alkaloid metabolic process	0.0511559	0	GO:0045898 regulation of RNA polymerase II transcriptional preinitiation complex assembly	0.0574226	0	GO:0007009 plasma membrane organization	0.0706668	0	GO:0040029 regulation of gene expression, epigenetic	0.0541019	0	GO:0032968 positive regulation of transcription elongation from RNA polymerase II promoter	0.0493143	0	GO:0046115 guanosine catabolic process	0.0815789	0	GO:0019005 SCF ubiquitin ligase complex	0.0699442	0	GO:0044042 glucan metabolic process	0.135482	0	GO:0015848 spermidine transport	0.0514829	0
GO:0003997 acyl-CoA oxidase activity	0.0774264	0	GO:0048869 cellular developmental process	0.0724996	0	GO:0048309 endoplasmic reticulum inheritance	0.0638471	0	GO:1901407 regulation of phosphorylation of RNA polymerase II C-terminal domain	0.0674469	0	GO:0009436 glyoxylate catabolic process	0.0511559	0	GO:0010970 transport along microtubule	0.0574226	0	GO:0002097 tRNA wobble base modification	0.0706668	0	GO:0048037 cofactor binding	0.0541019	0	GO:0007009 plasma membrane organization	0.0493143	0	GO:0005776 autophagosome	0.0815789	0	GO:0033875 ribonucleoside bisphosphate metabolic process	0.0699442	0	GO:0048585 negative regulation of response to stimulus	0.135482	0	GO:0046443 FAD metabolic process	0.0514829	0
GO:0050334 thiaminase activity	0.0774264	0	GO:0016192 vesicle-mediated transport	0.0725935	0	GO:0010484 H3 histone acetyltransferase activity	0.0638471	0	GO:0000244 spliceosomal tri-snRNP complex assembly	0.0674469	0	GO:0008252 nucleotidase activity	0.0511559	0	GO:0046503 glycerolipid catabolic process	0.0574226	0	GO:0000727 double-strand break repair via break-induced replication	0.0706668	0	GO:0008152 metabolic process	0.0564184	0	3UTR_PARS_RNAstructure	0.0494194	0	GO:0033110 Cvt vesicle membrane	0.0815789	0	GO:0015174 basic amino acid transmembrane transporter activity	0.0699442	0	GO:0006073 cellular glucan metabolic process	0.135482	0	GO:0015806 S-methylmethionine transport	0.0514829	0
GO:0009136 purine nucleoside diphosphate biosynthetic process	0.0774264	0	%Proteinturn	0.0764674	0	GO:0010822 positive regulation of mitochondrion organization	0.0638471	0	GO:0032365 intracellular lipid transport	0.0674469	0	GO:0002943 tRNA dihydrouridine synthesis	0.0511559	0	GO:0043171 peptide catabolic process	0.0574226	0	GO:0098754 detoxification	0.0723336	0	CDS_PARS_RNAstructure	0.0567696	0	GO:0034645 cellular macromolecule biosynthetic process	0.0494473	0	GO:2001246 negative regulation of phosphatidylcholine biosynthetic process	0.0815789	0	GO:0033013 tetrapyrrole metabolic process	0.0699442	0	GO:0043228 non-membrane-bounded organelle	0.139708	0	GO:0009061 anaerobic respiration	0.0514829	0
GO:0000939 condensed chromosome inner kinetochore	0.0774264	0	GO:0016818 hydrolase activity, acting on acid anhydrides, in phosphorus-containing anhydrides	0.0772962	0	GO:0004488 methylenetetrahydrofolate dehydrogenase (NADP+) activity	0.0638471	0	GO:0090224 regulation of spindle organization	0.0674469	0	GO:2001032 regulation of double-strand break repair via nonhomologous end joining	0.0511559	0	GO:1903050 regulation of proteolysis involved in cellular protein catabolic process	0.0574226	0	GO:0000502 proteasome complex	0.0723336	0	GO:0044702 single organism reproductive process	0.0584905	0	GO:0003677 DNA binding	0.0503124	0	GO:0046218 indolalkylamine catabolic process	0.0815789	0	GO:0030894 replisome	0.0699442	0	GO:0043232 intracellular non-membrane-bounded organelle	0.139708	0	GO:1900455 regulation of flocculation via cell wall protein-carbohydrate interaction	0.0514829	0
GO:0004750 ribulose-phosphate 3-epimerase activity	0.0774264	0	GO:0016817 hydrolase activity, acting on acid anhydrides	0.0772962	0	GO:0004477 methenyltetrahydrofolate cyclohydrolase activity	0.0638471	0	GO:0051090 regulation of sequence-specific DNA binding transcription factor activity	0.0674469	0	GO:0010569 regulation of double-strand break repair via homologous recombination	0.0511559	0	GO:0016884 carbon-nitrogen ligase activity, with glutamine as amido-N-donor	0.0574226	0	GO:0045017 glycerolipid biosynthetic process	0.0723336	0	%AA_E	0.0591095	0	GO:0016879 ligase activity, forming carbon-nitrogen bonds	0.0531623	0	GO:0070509 calcium ion import	0.0815789	0	GO:0042168 heme metabolic process	0.0699442	0	GO:0004553 hydrolase activity, hydrolyzing O-glycosyl compounds	0.140332	0	GO:1900524 positive regulation of flocculation via cell wall protein-carbohydrate interaction by positive regulation of transcription from RNA polymerase II promoter	0.0514829	0
GO:0005813 centrosome	0.0774264	0	GO:0016462 pyrophosphatase activity	0.0772962	0	GO:0004033 aldo-keto reductase (NADP) activity	0.0638471	0	GO:0045041 protein import into mitochondrial intermembrane space	0.0674469	0	GO:0019543 propionate catabolic process	0.0511559	0	GO:2001252 positive regulation of chromosome organization	0.0574226	0	GO:0042157 lipoprotein metabolic process	0.0723336	0	GO:0019887 protein kinase regulator activity	0.0599897	0	GO:0032880 regulation of protein localization	0.0531623	0	GO:0051569 regulation of histone H3-K4 methylation	0.0815789	0	GO:0033014 tetrapyrrole biosynthetic process	0.0699442	0	GO:0070972 protein localization to endoplasmic reticulum	0.140332	0	GO:0001196 regulation of mating-type specific transcription from RNA polymerase II promoter	0.0514829	0
GO:1903108 regulation of transcription from mitochondrial promoter	0.0774264	0	GO:0051321 meiotic cell cycle	0.0773308	0	GO:0000376 RNA splicing, via transesterification reactions with guanosine as nucleophile	0.0638471	0	GO:0043902 positive regulation of multi-organism process	0.0674469	0	GO:0019448 L-cysteine catabolic process	0.0511559	0	GO:0044699 single-organism process	0.0607043	0	GO:1905369 endopeptidase complex	0.0723336	0	GO:0051234 establishment of localization	0.0605006	0	GO:0044451 nucleoplasm part	0.0537406	0	GO:0031055 chromatin remodeling at centromere	0.0815789	0	GO:0004551 nucleotide diphosphatase activity	0.0699442	0	GC	0.143943	0	GO:2000877 negative regulation of oligopeptide transport	0.0514829	0
GO:1990578 perinuclear endoplasmic reticulum membrane	0.0774264	0	GO:0006888 ER to Golgi vesicle-mediated transport	0.0808404	0	GO:0033859 furaldehyde metabolic process	0.0638471	0	GO:1901409 positive regulation of phosphorylation of RNA polymerase II C-terminal domain	0.0674469	0	GO:1990804 protein phosphorylation involved in double-strand break repair via nonhomologous end joining	0.0511559	0	GO:0044440 endosomal part	0.0625685	0	GO:1990748 cellular detoxification	0.0723336	0	GO:0016538 cyclin-dependent protein serine/threonine kinase regulator activity	0.0609285	0	GO:0019637 organophosphate metabolic process	0.0540791	0	GO:0070382 exocytic vesicle	0.0815789	0	GO:0006779 porphyrin-containing compound biosynthetic process	0.0699442	0	GO:0065008 regulation of biological quality	0.144526	0	GO:0050685 positive regulation of mRNA processing	0.0514829	0
GO:0090481 pyrimidine nucleotide-sugar transmembrane transport	0.0774264	0	GO:0005667 transcription factor complex	0.0808852	0	GO:0000019 regulation of mitotic recombination	0.0638471	0	GO:0017070 U6 snRNA binding	0.0674469	0	GO:0060623 regulation of chromosome condensation	0.0511559	0	GO:0043604 amide biosynthetic process	0.0630034	0	%AA_E	0.0798058	0	GO:0009201 ribonucleoside triphosphate biosynthetic process	0.0609285	0	GO:0009259 ribonucleotide metabolic process	0.0548373	0	GO:0009188 ribonucleoside diphosphate biosynthetic process	0.0815789	0	GO:0015936 coenzyme A metabolic process	0.0699442	0	GO:0016485 protein processing	0.145157	0	GO:0034398 telomere tethering at nuclear periphery	0.0514829	0
GO:0001018 mitochondrial RNA polymerase regulatory region DNA binding	0.0774264	0	GO:0044798 nuclear transcription factor complex	0.0808852	0	GO:2000221 negative regulation of pseudohyphal growth	0.0638471	0	GO:0016846 carbon-sulfur lyase activity	0.0674469	0	GO:0070637 pyridine nucleoside metabolic process	0.0511559	0	GO:0070816 phosphorylation of RNA polymerase II C-terminal domain	0.0653637	0	GO:0010256 endomembrane system organization	0.0806067	0	GO:0070071 proton-transporting two-sector ATPase complex assembly	0.0609285	0	GO:0045814 negative regulation of gene expression, epigenetic	0.055653	0	GO:0044375 regulation of peroxisome size	0.0815789	0	GO:0006783 heme biosynthetic process	0.0699442	0	GO:0031225 anchored component of membrane	0.145157	0	GO:0007532 regulation of mating-type specific transcription, DNA-templated	0.0514829	0
GO:0032865 ERMES complex	0.0774264	0	GO:0022414 reproductive process	0.0821026	0	GO:0090297 positive regulation of mitochondrial DNA replication	0.0638471	0	GO:1900151 regulation of nuclear-transcribed mRNA catabolic process, deadenylation-dependent decay	0.0674469	0	GO:0042357 thiamine diphosphate metabolic process	0.0511559	0	GO:0009306 protein secretion	0.0653637	0	GO:0030246 carbohydrate binding	0.0839158	0	GO:0009206 purine ribonucleoside triphosphate biosynthetic process	0.0609285	0	GO:0016458 gene silencing	0.055653	0	GO:0051791 medium-chain fatty acid metabolic process	0.0815789	0	GO:0034032 purine nucleoside bisphosphate metabolic process	0.0699442	0	%Beta-sheet	0.147373	0	GO:0015847 putrescine transport	0.0514829	0
GO:1904062 regulation of cation transmembrane transport	0.0774264	0	GO:0031401 positive regulation of protein modification process	0.0850913	0	GO:0004180 carboxypeptidase activity	0.0638471	0	GO:0005675 holo TFIIH complex	0.0674469	0	GO:0030267 glyoxylate reductase (NADP) activity	0.0511559	0	GO:0042176 regulation of protein catabolic process	0.0653637	0	GO:0033260 nuclear DNA replication	0.0839158	0	GO:0015986 ATP synthesis coupled proton transport	0.0609285	0	GO:0006342 chromatin silencing	0.055653	0	GO:0000958 mitochondrial mRNA catabolic process	0.0815789	0	GO:0006664 glycolipid metabolic process	0.0708031	0	GO:0007124 pseudohyphal growth	0.149956	0	GO:0060188 regulation of protein desumoylation	0.0514829	0
GO:0045722 positive regulation of gluconeogenesis	0.0774264	0	GO:0005815 microtubule organizing center	0.0881309	0	GO:0004017 adenylate kinase activity	0.0638471	0	GO:0001323 age-dependent general metabolic decline involved in chronological cell aging	0.0674469	0	GO:1990802 protein phosphorylation involved in DNA double-strand break processing	0.0511559	0	GO:0005875 microtubule associated complex	0.0653637	0	GO:0031261 DNA replication preinitiation complex	0.0839158	0	GO:0090662 ATP hydrolysis coupled transmembrane transport	0.0609285	0	GO:0009199 ribonucleoside triphosphate metabolic process	0.055694	0	GO:0043629 ncRNA polyadenylation	0.0815789	0	GO:0009304 tRNA transcription	0.0708031	0	GO:0000030 mannosyltransferase activity	0.149956	0	GO:2000904 regulation of starch metabolic process	0.0514829	0
GO:0009180 purine ribonucleoside diphosphate biosynthetic process	0.0774264	0	GO:0044085 cellular component biogenesis	0.088482	0	GO:0008106 alcohol dehydrogenase (NADP+) activity	0.0638471	0	GO:0004128 cytochrome-b5 reductase activity, acting on NAD(P)H	0.0674469	0	GO:0034594 phosphatidylinositol trisphosphate phosphatase activity	0.0511559	0	GO:0009113 purine nucleobase biosynthetic process	0.0653637	0	GO:0044786 cell cycle DNA replication	0.0839158	0	GO:0046365 monosaccharide catabolic process	0.0609285	0	GO:0055086 nucleobase-containing small molecule metabolic process	0.0580328	0	GO:0071020 post-spliceosomal complex	0.0815789	0	GO:0046434 organophosphate catabolic process	0.0708031	0	GO:0046467 membrane lipid biosynthetic process	0.149956	0	GO:0006304 DNA modification	0.0514829	0
GO:0071556 integral component of lumenal side of endoplasmic reticulum membrane	0.0774264	0	GO:0009628 response to abiotic stimulus	0.0886966	0	GO:0006335 DNA replication-dependent nucleosome assembly	0.0638471	0	GO:0034724 DNA replication-independent nucleosome organization	0.0674469	0	GO:0017003 protein-heme linkage	0.0511559	0	GO:0030705 cytoskeleton-dependent intracellular transport	0.0653637	0	GO:0000083 regulation of transcription involved in G1/S transition of mitotic cell cycle	0.0839158	0	GO:0006754 ATP biosynthetic process	0.0609285	0	GO:0051276 chromosome organization	0.0590511	0	GO:0016077 snoRNA catabolic process	0.0815789	0	GO:0009247 glycolipid biosynthetic process	0.0708031	0	GO:0034622 cellular macromolecular complex assembly	0.153838	0	GO:0000354 cis assembly of pre-catalytic spliceosome	0.0514829	0
GO:0043968 histone H2A acetylation	0.0774264	0	GO:0007093 mitotic cell cycle checkpoint	0.0891299	0	GO:0035859 Seh1-associated complex	0.0638471	0	GO:0016721 oxidoreductase activity, acting on superoxide radicals as acceptor	0.0674469	0	GO:0004012 phospholipid-translocating ATPase activity	0.0511559	0	GO:0006928 movement of cell or subcellular component	0.0653637	0	GO:0006270 DNA replication initiation	0.0839158	0	GO:0070193 synaptonemal complex organization	0.0609285	0	GO:0033554 cellular response to stress	0.0595962	0	GO:1901893 positive regulation of cell septum assembly	0.0815789	0	GO:1903509 liposaccharide metabolic process	0.0708031	0	GO:0016049 cell growth	0.15473	0	GO:1903711 spermidine transmembrane transport	0.0514829	0
GO:0034245 mitochondrial DNA-directed RNA polymerase complex	0.0774264	0	GO:0000131 incipient cellular bud site	0.0891299	0	GO:0043101 purine-containing compound salvage	0.0638471	0	GO:0016661 oxidoreductase activity, acting on other nitrogenous compounds as donors	0.0674469	0	GO:0010695 regulation of spindle pole body separation	0.0511559	0	GO:1903322 positive regulation of protein modification by small protein conjugation or removal	0.0653637	0	GO:0046914 transition metal ion binding	0.0857076	0	GO:0044769 ATPase activity, coupled to transmembrane movement of ions, rotational mechanism	0.0609285	0	GO:0055070 copper ion homeostasis	0.0598523	0	GO:0070130 negative regulation of mitochondrial translation	0.0815789	0	GO:0042797 tRNA transcription from RNA polymerase III promoter	0.0708031	0	GO:0006612 protein targeting to membrane	0.15473	0	GO:2000531 regulation of fatty acid biosynthetic process by regulation of transcription from RNA polymerase II promoter	0.0514829	0
GO:0071818 BAT3 complex	0.0774264	0	GO:0033045 regulation of sister chromatid segregation	0.0891299	0	GO:0006895 Golgi to endosome transport	0.0638471	0	GO:0001324 age-dependent response to oxidative stress involved in chronological cell aging	0.0674469	0	GO:1904523 regulation of DNA amplification	0.0511559	0	GO:0000742 karyogamy involved in conjugation with cellular fusion	0.0653637	0	GO:0051094 positive regulation of developmental process	0.0875959	0	GO:0015985 energy coupled proton transport, down electrochemical gradient	0.0609285	0	GO:0000049 tRNA binding	0.0598523	0	GO:0035694 mitochondrial protein catabolic process	0.0815789	0	GO:0001558 regulation of cell growth	0.0708031	0	GO:0055072 iron ion homeostasis	0.159478	0	GO:0031684 heterotrimeric G-protein complex cycle	0.0514829	0
GO:0009166 nucleotide catabolic process	0.0774264	0	GO:0000149 SNARE binding	0.0891299	0	GO:1901858 regulation of mitochondrial DNA metabolic process	0.0638471	0	GO:1990481 mRNA pseudouridine synthesis	0.0674469	0	GO:0034628 'de novo' NAD biosynthetic process from aspartate	0.0511559	0	GO:0006144 purine nucleobase metabolic process	0.0653637	0	GO:1903826 arginine transmembrane transport	0.0875959	0	GO:0000245 spliceosomal complex assembly	0.0609285	0	GO:0000462 maturation of SSU-rRNA from tricistronic rRNA transcript (SSU-rRNA, 5.8S rRNA, LSU-rRNA)	0.0601184	0	GO:0097306 cellular response to alcohol	0.0815789	0	GO:0005548 phospholipid transporter activity	0.0708031	0	GO:0080134 regulation of response to stress	0.159478	0	GO:0006688 glycosphingolipid biosynthetic process	0.0514829	0
GO:0009514 glyoxysome	0.0774264	0	GO:0006862 nucleotide transport	0.0891299	0	GO:0008242 omega peptidase activity	0.0638471	0	GO:0042325 regulation of phosphorylation	0.0679201	0	GO:0045332 phospholipid translocation	0.0511559	0	GO:0002790 peptide secretion	0.0653637	0	GO:0046471 phosphatidylglycerol metabolic process	0.0875959	0	GO:0009145 purine nucleoside triphosphate biosynthetic process	0.0609285	0	GO:0061630 ubiquitin protein ligase activity	0.0603769	0	GO:2000679 positive regulation of transcription regulatory region DNA binding	0.0815789	0	median_IUPRED	0.0746176	0	GO:0097502 mannosylation	0.159478	0	GO:0035510 DNA dealkylation	0.0514829	0
GO:0052718 tRNA-specific adenosine-34 deaminase complex	0.0774264	0	GO:0044804 nucleophagy	0.0891299	0	GO:0050821 protein stabilization	0.0638471	0	GO:1901576 organic substance biosynthetic process	0.0702442	0	GO:0071589 pyridine nucleoside biosynthetic process	0.0511559	0	GO:0000788 nuclear nucleosome	0.0653637	0	GO:0046475 glycerophospholipid catabolic process	0.0875959	0	GO:0071011 precatalytic spliceosome	0.0609285	0	GO:0061659 ubiquitin-like protein ligase activity	0.0603769	0	GO:0099503 secretory vesicle	0.0815789	0	GO:0006820 anion transport	0.0758273	0	GO:0009063 cellular amino acid catabolic process	0.159478	0	GO:0006480 N-terminal protein amino acid methylation	0.0514829	0
GO:0051297 centrosome organization	0.0774264	0	GO:0051128 regulation of cellular component organization	0.0915413	0	GO:0006166 purine ribonucleoside salvage	0.0638471	0	GO:0044249 cellular biosynthetic process	0.0702745	0	GO:0004121 cystathionine beta-lyase activity	0.0511559	0	GO:0005775 vacuolar lumen	0.0653637	0	GO:0009219 pyrimidine deoxyribonucleotide metabolic process	0.0875959	0	GO:0051716 cellular response to stimulus	0.0613919	0	GO:0022616 DNA strand elongation	0.0603769	0	GO:0051571 positive regulation of histone H3-K4 methylation	0.0815789	0	GO:0043623 cellular protein complex assembly	0.0800996	0	GO:0005975 carbohydrate metabolic process	0.161059	0	GO:2000906 positive regulation of starch metabolic process	0.0514829	0
GO:0008793 aromatic-amino-acid:2-oxoglutarate aminotransferase activity	0.0774264	0	GO:0043934 sporulation	0.0921539	0	GO:0090296 regulation of mitochondrial DNA replication	0.0638471	0	GO:0044042 glucan metabolic process	0.0731153	0	GO:0006190 inosine salvage	0.0511559	0	%Proteinturn	0.0655291	0	GO:0006995 cellular response to nitrogen starvation	0.0875959	0	GO:0033036 macromolecule localization	0.0615347	0	GO:0000727 double-strand break repair via break-induced replication	0.0603769	0	GO:0071037 nuclear polyadenylation-dependent snRNA catabolic process	0.0815789	0	GO:0016021 integral component of membrane	0.0801815	0	synthetic_genetic_interaction	0.161562	0	GO:0006021 inositol biosynthetic process	0.0514829	0
GO:0015785 UDP-galactose transport	0.0774264	0	GO:0048646 anatomical structure formation involved in morphogenesis	0.0921539	0	GO:0033833 hydroxymethylfurfural reductase (NADH) activity	0.0638471	0	GO:0004553 hydrolase activity, hydrolyzing O-glycosyl compounds	0.0731153	0	GO:0034720 histone H3-K4 demethylation	0.0511559	0	GO:0050896 response to stimulus	0.0659176	0	GO:0031080 nuclear pore outer ring	0.0875959	0	GO:0044451 nucleoplasm part	0.0630944	0	GO:0031503 protein complex localization	0.0603769	0	GO:0009180 purine ribonucleoside diphosphate biosynthetic process	0.0815789	0	GO:0008233 peptidase activity	0.0804682	0	GO:0032535 regulation of cellular component size	0.164202	0	GO:0030155 regulation of cell adhesion	0.0514829	0
GO:0010037 response to carbon dioxide	0.0774264	0	GO:0030435 sporulation resulting in formation of a cellular spore	0.0921539	0	GO:0005984 disaccharide metabolic process	0.0638471	0	GO:0006073 cellular glucan metabolic process	0.0731153	0	GO:0008253 5'-nucleotidase activity	0.0511559	0	GO:0006897 endocytosis	0.0671562	0	GO:0010142 farnesyl diphosphate biosynthetic process, mevalonate pathway	0.0875959	0	GO:0034470 ncRNA processing	0.0655585	0	GO:0071852 fungal-type cell wall organization or biogenesis	0.0606947	0	GO:0048194 Golgi vesicle budding	0.0815789	0	GO:0055065 metal ion homeostasis	0.0829872	0	GO:0090066 regulation of anatomical structure size	0.164202	0	GO:0045004 DNA replication proofreading	0.0514829	0
GO:0004408 holocytochrome-c synthase activity	0.0774264	0	GO:0031227 intrinsic component of endoplasmic reticulum membrane	0.0929191	0	GO:1901860 positive regulation of mitochondrial DNA metabolic process	0.0638471	0	GO:0003674 molecular_function	0.0768857	0	GO:0051225 spindle assembly	0.0511559	0	GO:0022626 cytosolic ribosome	0.0671562	0	GO:1902358 sulfate transmembrane transport	0.0875959	0	GO:0010629 negative regulation of gene expression	0.0662747	0	GO:0003735 structural constituent of ribosome	0.0619897	0	GO:0006846 acetate transport	0.0815789	0	GO:0006873 cellular ion homeostasis	0.0829872	0	GO:0006997 nucleus organization	0.164202	0	GO:0006687 glycosphingolipid metabolic process	0.0514829	0
GO:0006078 (1->6)-beta-D-glucan biosynthetic process	0.0774264	0	GO:0030176 integral component of endoplasmic reticulum membrane	0.0929191	0	GO:0034318 alcohol O-acyltransferase activity	0.0638471	0	GO:0000978 RNA polymerase II core promoter proximal region sequence-specific DNA binding	0.0781188	0	GO:1902002 protein phosphorylation involved in cellular protein catabolic process	0.0511559	0	GO:0051726 regulation of cell cycle	0.0679862	0	GO:0008379 thioredoxin peroxidase activity	0.0875959	0	GO:0006399 tRNA metabolic process	0.0690862	0	GO:0044429 mitochondrial part	0.0642795	0	GO:0070567 cytidylyltransferase activity	0.0815789	0	GO:0004386 helicase activity	0.0836542	0	GO:0016787 hydrolase activity	0.170189	0	GO:0036095 positive regulation of invasive growth in response to glucose limitation by positive regulation of transcription from RNA polymerase II promoter	0.0514829	0
GO:0004000 adenosine deaminase activity	0.0774264	0	GO:0044877 macromolecular complex binding	0.0935862	0	GO:0009311 oligosaccharide metabolic process	0.0638471	0	GO:0071900 regulation of protein serine/threonine kinase activity	0.0832281	0	GO:0045738 negative regulation of DNA repair	0.0511559	0	GO:0051130 positive regulation of cellular component organization	0.069492	0	GO:0004096 catalase activity	0.0875959	0	GO:0008289 lipid binding	0.0713338	0	GO:0008152 metabolic process	0.0643987	0	GO:0004487 methylenetetrahydrofolate dehydrogenase (NAD+) activity	0.0815789	0	GO:0033108 mitochondrial respiratory chain complex assembly	0.0836542	0	GO:0005758 mitochondrial intermembrane space	0.173575	0	GO:0006297 nucleotide-excision repair, DNA gap filling	0.0514829	0
GO:0051298 centrosome duplication	0.0774264	0	GO:0009266 response to temperature stimulus	0.0949891	0	GO:0030308 negative regulation of cell growth	0.0638471	0	GO:0000982 transcription factor activity, RNA polymerase II core promoter proximal region sequence-specific binding	0.0832281	0	GO:0031440 regulation of mRNA 3'-end processing	0.0511559	0	GO:0043227 membrane-bounded organelle	0.0701009	0	GO:0051920 peroxiredoxin activity	0.0875959	0	GO:0010467 gene expression	0.0720712	0	GO:0009059 macromolecule biosynthetic process	0.0656972	0	GO:0034459 ATP-dependent 3'-5' RNA helicase activity	0.0815789	0	GO:0015630 microtubule cytoskeleton	0.084395	0	geneLen	0.174015	0	GO:0035957 positive regulation of starch catabolic process by positive regulation of transcription from RNA polymerase II promoter	0.0514829	0
GO:0046098 guanine metabolic process	0.0774264	0	GO:0000245 spliceosomal complex assembly	0.100426	0	GO:0044255 cellular lipid metabolic process	0.0642303	0	GO:0019887 protein kinase regulator activity	0.0832281	0	GO:0017006 protein-tetrapyrrole linkage	0.0511559	0	GO:0016645 oxidoreductase activity, acting on the CH-NH group of donors	0.0732408	0	GO:0043614 multi-eIF complex	0.0875959	0	GO:0046700 heterocycle catabolic process	0.0731137	0	GO:0030134 ER to Golgi transport vesicle	0.0664999	0	GO:0072742 SAGA complex localization to transcription regulatory region	0.0815789	0	GO:0008033 tRNA processing	0.084395	0	GO:0065003 macromolecular complex assembly	0.175881	0	GO:0033120 positive regulation of RNA splicing	0.0514829	0
GO:1902272 regulation of (R)-carnitine transmembrane transport	0.0774264	0	GO:0031399 regulation of protein modification process	0.100548	0	GO:0000502 proteasome complex	0.0650403	0	GO:0048519 negative regulation of biological process	0.0833796	0	GO:0032515 negative regulation of phosphoprotein phosphatase activity	0.0511559	0	GO:0051647 nucleus localization	0.0732408	0	GO:0010453 regulation of cell fate commitment	0.0875959	0	GO:0032984 macromolecular complex disassembly	0.073321	0	GO:0008535 respiratory chain complex IV assembly	0.0664999	0	GO:0004477 methenyltetrahydrofolate cyclohydrolase activity	0.0815789	0	GO:0009059 macromolecule biosynthetic process	0.0857114	0	%AA_R	0.176323	0	GO:1990683 DNA double-strand break attachment to nuclear envelope	0.0514829	0
GO:0050708 regulation of protein secretion	0.0774264	0	GO:0015934 large ribosomal subunit	0.102416	0	GO:0016667 oxidoreductase activity, acting on a sulfur group of donors	0.0650403	0	GO:0016423 tRNA (guanine) methyltransferase activity	0.0836014	0	GO:0015741 fumarate transport	0.0511559	0	GO:0032386 regulation of intracellular transport	0.0732408	0	GO:0006003 fructose 2,6-bisphosphate metabolic process	0.0875959	0	GO:0042327 positive regulation of phosphorylation	0.073321	0	GO:0043934 sporulation	0.0675383	0	GO:0010973 positive regulation of barrier septum assembly	0.0815789	0	GO:0005762 mitochondrial large ribosomal subunit	0.0864838	0	GO:0050789 regulation of biological process	0.177482	0	GO:0009732 detection of hexose stimulus	0.0514829	0
GO:0032545 CURI complex	0.0774264	0	GO:0043933 macromolecular complex subunit organization	0.104664	0	GO:0098754 detoxification	0.0650403	0	GO:0019905 syntaxin binding	0.0836014	0	GO:0019355 nicotinamide nucleotide biosynthetic process from aspartate	0.0511559	0	GO:0045165 cell fate commitment	0.0732408	0	GO:0015181 arginine transmembrane transporter activity	0.0875959	0	GO:0042626 ATPase activity, coupled to transmembrane movement of substances	0.073321	0	GO:0030435 sporulation resulting in formation of a cellular spore	0.0675383	0	GO:0006554 lysine catabolic process	0.0815789	0	GO:0000315 organellar large ribosomal subunit	0.0864838	0	GO:0044801 single-organism membrane fusion	0.178224	0	GO:0045490 pectin catabolic process	0.0514829	0
GO:1902969 mitotic DNA replication	0.0774264	0	GO:0006892 post-Golgi vesicle-mediated transport	0.105158	0	GO:1990748 cellular detoxification	0.0650403	0	GO:0000303 response to superoxide	0.0836014	0	GO:1990801 protein phosphorylation involved in mitotic spindle assembly	0.0511559	0	GO:0046653 tetrahydrofolate metabolic process	0.0732408	0	GO:0017133 mitochondrial electron transfer flavoprotein complex	0.0875959	0	GO:0016820 hydrolase activity, acting on acid anhydrides, catalyzing transmembrane movement of substances	0.073321	0	GO:0030695 GTPase regulator activity	0.0683081	0	GO:0015123 acetate transmembrane transporter activity	0.0815789	0	%AA_V	0.0882423	0	GO:0031970 organelle envelope lumen	0.178224	0	GO:0045785 positive regulation of cell adhesion	0.0514829	0
GO:0042725 thiamine-containing compound catabolic process	0.0774264	0	GO:0008047 enzyme activator activity	0.106106	0	GO:1905369 endopeptidase complex	0.0650403	0	GO:0061013 regulation of mRNA catabolic process	0.0836014	0	GO:2000780 negative regulation of double-strand break repair	0.0511559	0	GO:0007531 mating type determination	0.0732408	0	GO:0004360 glutamine-fructose-6-phosphate transaminase (isomerizing) activity	0.0875959	0	GO:0033613 activating transcription factor binding	0.073321	0	%AA_R	0.0706871	0	GO:0022833 mechanically gated channel activity	0.0815789	0	GO:0055080 cation homeostasis	0.0894353	0	GO:0016798 hydrolase activity, acting on glycosyl bonds	0.178224	0	GO:0035568 N-terminal peptidyl-proline methylation	0.0514829	0
GO:0009732 detection of hexose stimulus	0.0774264	0	GO:0065003 macromolecular complex assembly	0.108279	0	GO:0044429 mitochondrial part	0.0663754	0	GO:0032881 regulation of polysaccharide metabolic process	0.0836014	0	GO:0071591 nicotinic acid riboside metabolic process	0.0511559	0	GO:0040023 establishment of nucleus localization	0.0732408	0	GO:0031414 N-terminal protein acetyltransferase complex	0.0875959	0	GO:0007584 response to nutrient	0.073321	0	GO:0006732 coenzyme metabolic process	0.0709406	0	GO:0097305 response to alcohol	0.0815789	0	GO:0032774 RNA biosynthetic process	0.0922306	0	GO:0043565 sequence-specific DNA binding	0.179044	0	GO:0042946 glucoside transport	0.0514829	0
GO:1902031 regulation of NADP metabolic process	0.0774264	0	GO:0016054 organic acid catabolic process	0.109633	0	GO:0051052 regulation of DNA metabolic process	0.0688205	0	GO:0043471 regulation of cellular carbohydrate catabolic process	0.0836014	0	GO:0090224 regulation of spindle organization	0.0511559	0	GO:0007530 sex determination	0.0732408	0	GO:1900088 regulation of inositol biosynthetic process	0.0875959	0	GO:0001102 RNA polymerase II activating transcription factor binding	0.073321	0	GO:0051704 multi-organism process	0.0711916	0	GO:0004113 2',3'-cyclic-nucleotide 3'-phosphodiesterase activity	0.0815789	0	GO:0008535 respiratory chain complex IV assembly	0.0926914	0	GO:0042592 homeostatic process	0.181064	0	GO:1903313 positive regulation of mRNA metabolic process	0.0514829	0
GO:0006390 transcription from mitochondrial promoter	0.0774264	0	GO:0016810 hydrolase activity, acting on carbon-nitrogen (but not peptide) bonds	0.109633	0	GO:0051536 iron-sulfur cluster binding	0.071355	0	GO:0032126 eisosome	0.0836014	0	GO:0010923 negative regulation of phosphatase activity	0.0511559	0	GO:0007097 nuclear migration	0.0732408	0	GO:0035999 tetrahydrofolate interconversion	0.0875959	0	GO:0043492 ATPase activity, coupled to movement of substances	0.073321	0	GO:0006259 DNA metabolic process	0.0713687	0	GO:0004488 methylenetetrahydrofolate dehydrogenase (NADP+) activity	0.0815789	0	GO:0050794 regulation of cellular process	0.0929078	0	GO:0044264 cellular polysaccharide metabolic process	0.182849	0	GO:0000017 alpha-glucoside transport	0.0514829	0
GO:0098553 lumenal side of endoplasmic reticulum membrane	0.0774264	0	GO:0046395 carboxylic acid catabolic process	0.109633	0	GO:0034212 peptide N-acetyltransferase activity	0.071355	0	GO:0001306 age-dependent response to oxidative stress	0.0836014	0	GO:0045875 negative regulation of sister chromatid cohesion	0.0511559	0	GO:0071902 positive regulation of protein serine/threonine kinase activity	0.0732408	0	GO:0046075 dTTP metabolic process	0.0875959	0	GO:0060090 binding, bridging	0.073321	0	GO:0072503 cellular divalent inorganic cation homeostasis	0.0725709	0	GO:0034511 U3 snoRNA binding	0.0815789	0	GO:0051188 cofactor biosynthetic process	0.0953247	0	GO:0004175 endopeptidase activity	0.182849	0	GO:0006307 DNA dealkylation involved in DNA repair	0.0514829	0
GO:0000941 condensed nuclear chromosome inner kinetochore	0.0774264	0	GO:0003682 chromatin binding	0.109922	0	GO:0048308 organelle inheritance	0.071355	0	GO:0016653 oxidoreductase activity, acting on NAD(P)H, heme protein as acceptor	0.0836014	0	GO:2000779 regulation of double-strand break repair	0.0511559	0	GO:0007533 mating type switching	0.0732408	0	GO:0009265 2'-deoxyribonucleotide biosynthetic process	0.0875959	0	GO:0030674 protein binding, bridging	0.073321	0	GO:0016645 oxidoreductase activity, acting on the CH-NH group of donors	0.0725709	0	GO:0033754 indoleamine 2,3-dioxygenase activity	0.0815789	0	GO:0032592 integral component of mitochondrial membrane	0.09559	0	GO:0071554 cell wall organization or biogenesis	0.187151	0	GO:0007032 endosome organization	0.0514829	0
GO:1990683 DNA double-strand break attachment to nuclear envelope	0.0774264	0	GO:0016887 ATPase activity	0.110138	0	GO:0051540 metal cluster binding	0.071355	0	GO:0010181 FMN binding	0.0836014	0	GO:0035307 positive regulation of protein dephosphorylation	0.0511559	0	GO:0070507 regulation of microtubule cytoskeleton organization	0.0732408	0	GO:1903530 regulation of secretion by cell	0.0875959	0	GO:0031670 cellular response to nutrient	0.073321	0	GO:0072507 divalent inorganic cation homeostasis	0.0725709	0	GO:1901658 glycosyl compound catabolic process	0.0815789	0	GO:0098573 intrinsic component of mitochondrial membrane	0.0968855	0	GO:0098573 intrinsic component of mitochondrial membrane	0.187449	0	GO:1900436 positive regulation of filamentous growth of a population of unicellular organisms in response to starvation	0.0514829	0
GO:0034246 mitochondrial RNA polymerase binding promoter specificity activity	0.0774264	0	GO:0048878 chemical homeostasis	0.110368	0	GO:0010499 proteasomal ubiquitin-independent protein catabolic process	0.0728428	0	GO:0071451 cellular response to superoxide	0.0836014	0	GO:0009093 cysteine catabolic process	0.0511559	0	GO:0042274 ribosomal small subunit biogenesis	0.0742445	0	GO:0050308 sugar-phosphatase activity	0.0875959	0	GO:0043170 macromolecule metabolic process	0.0736282	0	GO:0070201 regulation of establishment of protein localization	0.0725709	0	GO:0019477 L-lysine catabolic process	0.0815789	0	GO:0000790 nuclear chromatin	0.0996948	0	GO:0051604 protein maturation	0.187449	0	GO:0010811 positive regulation of cell-substrate adhesion	0.0514829	0
GO:0004015 adenosylmethionine-8-amino-7-oxononanoate transaminase activity	0.0774264	0	GO:0045944 positive regulation of transcription from RNA polymerase II promoter	0.110862	0	GO:0004298 threonine-type endopeptidase activity	0.0728428	0	GO:0019430 removal of superoxide radicals	0.0836014	0	GO:0015138 fumarate transmembrane transporter activity	0.0511559	0	GO:1901565 organonitrogen compound catabolic process	0.07666	0	GO:0031417 NatC complex	0.0875959	0	GO:0006281 DNA repair	0.0739326	0	GO:0000272 polysaccharide catabolic process	0.0725709	0	GO:0043388 positive regulation of DNA binding	0.0815789	0	GO:0006875 cellular metal ion homeostasis	0.10014	0	GO:0061025 membrane fusion	0.187449	0	GO:0009436 glyoxylate catabolic process	0.0514829	0
GO:0060236 regulation of mitotic spindle organization	0.0774264	0	GO:0005761 mitochondrial ribosome	0.110988	0	GO:0071428 rRNA-containing ribonucleoprotein complex export from nucleus	0.0728428	0	GO:0044233 ER-mitochondrion membrane contact site	0.0836014	0	GO:0004865 protein serine/threonine phosphatase inhibitor activity	0.0511559	0	GO:0032886 regulation of microtubule-based process	0.0810544	0	GO:0045947 negative regulation of translational initiation	0.0875959	0	GO:0043933 macromolecular complex subunit organization	0.0746315	0	GO:0005775 vacuolar lumen	0.0725709	0	GO:0015275 stretch-activated, cation-selective, calcium channel activity	0.0815789	0	GO:0034645 cellular macromolecule biosynthetic process	0.100504	0	GO:0003924 GTPase activity	0.187449	0	GO:0060256 regulation of flocculation	0.0514829	0
GO:0008897 holo-[acyl-carrier-protein] synthase activity	0.0774264	0	GO:0000313 organellar ribosome	0.110988	0	GO:0070003 threonine-type peptidase activity	0.0728428	0	GO:2000217 regulation of invasive growth in response to glucose limitation	0.0836014	0	GO:0008190 eukaryotic initiation factor 4E binding	0.0511559	0	GO:0060261 positive regulation of transcription initiation from RNA polymerase II promoter	0.0810544	0	GO:0006235 dTTP biosynthetic process	0.0875959	0	GO:0033043 regulation of organelle organization	0.074954	0	GO:0006518 peptide metabolic process	0.0736164	0	GO:0033680 ATP-dependent DNA/RNA helicase activity	0.0815789	0	GO:0018065 protein-cofactor linkage	0.106443	0	GO:0034641 cellular nitrogen compound metabolic process	0.193165	0	GO:0048026 positive regulation of mRNA splicing, via spliceosome	0.0514829	0
GO:0004385 guanylate kinase activity	0.0774264	0	GO:0019751 polyol metabolic process	0.111245	0	GO:0048475 coated membrane	0.0728428	0	GO:0000305 response to oxygen radical	0.0836014	0	GO:0000455 enzyme-directed rRNA pseudouridine synthesis	0.0511559	0	GO:0017025 TBP-class protein binding	0.0810544	0	GO:0009221 pyrimidine deoxyribonucleotide biosynthetic process	0.0875959	0	GO:0045934 negative regulation of nucleobase-containing compound metabolic process	0.074954	0	GO:0045944 positive regulation of transcription from RNA polymerase II promoter	0.0744787	0	GO:0097553 calcium ion transmembrane import into cytosol	0.0815789	0	GO:0042398 cellular modified amino acid biosynthetic process	0.106443	0	GO:0072594 establishment of protein localization to organelle	0.193273	0	GO:0035953 regulation of dipeptide transport by regulation of transcription from RNA polymerase II promoter	0.0514829	0
GO:0016242 negative regulation of macroautophagy	0.0774264	0	GO:0010965 regulation of mitotic sister chromatid separation	0.111245	0	GO:0000054 ribosomal subunit export from nucleus	0.0728428	0	GO:0034456 UTP-C complex	0.0836014	0	GO:1901319 positive regulation of trehalose catabolic process	0.0511559	0	GO:0006730 one-carbon metabolic process	0.0810544	0	GO:0031494 regulation of mating type switching	0.0875959	0	GO:0019207 kinase regulator activity	0.0756905	0	GO:0043087 regulation of GTPase activity	0.0747104	0	GO:0046440 L-lysine metabolic process	0.0815789	0	GO:0006301 postreplication repair	0.106443	0	%AA_Q	0.193435	0	GO:0035955 negative regulation of dipeptide transport by negative regulation of transcription from RNA polymerase II promoter	0.0514829	0
GO:0003854 3-beta-hydroxy-delta5-steroid dehydrogenase activity	0.0774264	0	GO:0033047 regulation of mitotic sister chromatid segregation	0.111245	0	GO:0019985 translesion synthesis	0.0728428	0	GO:0042973 glucan endo-1,3-beta-D-glucosidase activity	0.0836014	0	GO:0047964 glyoxylate reductase activity	0.0511559	0	GO:0000307 cyclin-dependent protein kinase holoenzyme complex	0.0810544	0	GO:0045337 farnesyl diphosphate biosynthetic process	0.0875959	0	GO:0044248 cellular catabolic process	0.0757166	0	GO:1901360 organic cyclic compound metabolic process	0.0750206	0	GO:0000707 meiotic DNA recombinase assembly	0.0815789	0	GO:0008017 microtubule binding	0.106443	0	GO:0006605 protein targeting	0.197371	0	GO:0006287 base-excision repair, gap-filling	0.0514829	0
GO:0005537 mannose binding	0.0774264	0	GO:0060089 molecular transducer activity	0.111245	0	GO:0033750 ribosome localization	0.0728428	0	GO:0006801 superoxide metabolic process	0.0836014	0	GO:1990139 protein localization to nuclear periphery	0.0511559	0	GO:0000786 nucleosome	0.0810544	0	GO:0002183 cytoplasmic translational initiation	0.0875959	0	GO:0034645 cellular macromolecule biosynthetic process	0.0763197	0	Num_SNPs	0.0761259	0	GO:0008311 double-stranded DNA 3'-5' exodeoxyribonuclease activity	0.0815789	0	GO:0019205 nucleobase-containing compound kinase activity	0.106443	0	GO:0006643 membrane lipid metabolic process	0.201105	0	GO:0090220 chromosome localization to nuclear envelope involved in homologous chromosome segregation	0.0514829	0
GO:0016679 oxidoreductase activity, acting on diphenols and related substances as donors	0.0774264	0	GO:0030134 ER to Golgi transport vesicle	0.111245	0	GO:0033753 establishment of ribosome localization	0.0728428	0	GO:0010525 regulation of transposition, RNA-mediated	0.0836014	0	GO:2001021 negative regulation of response to DNA damage stimulus	0.0511559	0	GO:0031396 regulation of protein ubiquitination	0.0810544	0	GO:0009129 pyrimidine nucleoside monophosphate metabolic process	0.0875959	0	GO:0043623 cellular protein complex assembly	0.076373	0	GO:0045229 external encapsulating structure organization	0.0770031	0	GO:0004141 dethiobiotin synthase activity	0.0815789	0	GO:0016796 exonuclease activity, active with either ribo- or deoxyribonucleic acids and producing 5'-phosphomonoesters	0.106443	0	GO:0034613 cellular protein localization	0.204748	0	GO:2000883 positive regulation of starch catabolic process	0.0514829	0
GO:1990456 mitochondrion-ER tethering	0.0774264	0	GO:1901991 negative regulation of mitotic cell cycle phase transition	0.111245	0	GO:0030117 membrane coat	0.0728428	0	GO:0000730 DNA recombinase assembly	0.0836014	0	GO:0019626 short-chain fatty acid catabolic process	0.0511559	0	GO:0005507 copper ion binding	0.0810544	0	GO:0009130 pyrimidine nucleoside monophosphate biosynthetic process	0.0875959	0	GO:0045814 negative regulation of gene expression, epigenetic	0.0764743	0	GO:0071555 cell wall organization	0.0770031	0	GO:1990380 Lys48-specific deubiquitinase activity	0.0815789	0	GO:0030003 cellular cation homeostasis	0.107725	0	GO:0007154 cell communication	0.205609	0	GO:0034287 detection of monosaccharide stimulus	0.0514829	0
GO:0072417 response to spindle checkpoint signaling	0.0774264	0	GO:0042787 protein ubiquitination involved in ubiquitin-dependent protein catabolic process	0.111245	0	GO:0000011 vacuole inheritance	0.0728428	0	GO:0007571 age-dependent general metabolic decline	0.0836014	0	GO:0070058 tRNA gene clustering	0.0511559	0	GO:0005881 cytoplasmic microtubule	0.0810544	0	GO:0008272 sulfate transport	0.0875959	0	GO:0006342 chromatin silencing	0.0764743	0	GO:0044391 ribosomal subunit	0.0774944	0	GO:0004385 guanylate kinase activity	0.0815789	0	GO:0009067 aspartate family amino acid biosynthetic process	0.107798	0	GO:0044182 filamentous growth of a population of unicellular organisms	0.205609	0	GO:0044728 DNA methylation or demethylation	0.0514829	0
GO:0000248 C-5 sterol desaturase activity	0.0774264	0	GO:0030071 regulation of mitotic metaphase/anaphase transition	0.111245	0	GO:0005838 proteasome regulatory particle	0.0728428	0	GO:0005688 U6 snRNP	0.0836014	0	GO:0018026 peptidyl-lysine monomethylation	0.0511559	0	GO:2000144 positive regulation of DNA-templated transcription, initiation	0.0810544	0	GO:0000142 cellular bud neck contractile ring	0.0875959	0	GO:0016458 gene silencing	0.0764743	0	GO:0005856 cytoskeleton	0.0774944	0	GO:0003854 3-beta-hydroxy-delta5-steroid dehydrogenase activity	0.0815789	0	GO:0070192 chromosome organization involved in meiotic cell cycle	0.107798	0	GO:0008092 cytoskeletal protein binding	0.205609	0	GO:2000879 negative regulation of dipeptide transport	0.0514829	0
GO:0034287 detection of monosaccharide stimulus	0.0774264	0	GO:1902099 regulation of metaphase/anaphase transition of cell cycle	0.111245	0	GO:0022624 proteasome accessory complex	0.0728428	0	GO:0045116 protein neddylation	0.0836014	0	GO:0034649 histone demethylase activity (H3-monomethyl-K4 specific)	0.0511559	0	GO:0051247 positive regulation of protein metabolic process	0.0840574	0	GO:0051046 regulation of secretion	0.0875959	0	GO:0006260 DNA replication	0.0765423	0	GO:0048878 chemical homeostasis	0.0805603	0	GO:0030621 U4 snRNA binding	0.0815789	0	GO:0030529 intracellular ribonucleoprotein complex	0.110149	0	GO:0070783 growth of unicellular organism as a thread of attached cells	0.205609	0	GO:0052746 inositol phosphorylation	0.0514829	0
GO:0032261 purine nucleotide salvage	0.0774264	0	GO:0004872 receptor activity	0.111245	0	GO:0055076 transition metal ion homeostasis	0.0738332	0	GO:0045737 positive regulation of cyclin-dependent protein serine/threonine kinase activity	0.0836014	0	GO:0018063 cytochrome c-heme linkage	0.0511559	0	GO:0032270 positive regulation of cellular protein metabolic process	0.0840574	0	GO:0015556 C4-dicarboxylate transmembrane transporter activity	0.0875959	0	GO:0005743 mitochondrial inner membrane	0.0782959	0	GO:0044712 single-organism catabolic process	0.0816382	0	GO:0008973 phosphopentomutase activity	0.0815789	0	GO:1990904 ribonucleoprotein complex	0.110149	0	%AA_P	0.209644	0	GO:1900187 regulation of cell adhesion involved in single-species biofilm formation	0.0514829	0
GO:0004474 malate synthase activity	0.0774264	0	GO:1901988 negative regulation of cell cycle phase transition	0.111245	0	GO:0051246 regulation of protein metabolic process	0.0747752	0	GO:0071450 cellular response to oxygen radical	0.0836014	0	GO:0035308 negative regulation of protein dephosphorylation	0.0511559	0	GO:0007346 regulation of mitotic cell cycle	0.0865715	0	GO:0022615 protein to membrane docking	0.0875959	0	GO:0010639 negative regulation of organelle organization	0.0783458	0	GO:0044271 cellular nitrogen compound biosynthetic process	0.0833392	0	GO:0004735 pyrroline-5-carboxylate reductase activity	0.0815789	0	GO:0097659 nucleic acid-templated transcription	0.111495	0	GO:0048284 organelle fusion	0.21009	0	GO:0097240 chromosome attachment to the nuclear envelope	0.0514829	0
GO:1990115 RNA Polymerase III assembly	0.0774264	0	GO:0046148 pigment biosynthetic process	0.114402	0	%AA_F	0.0762342	0	GO:0032991 macromolecular complex	0.084327	0	GO:0005658 alpha DNA polymerase:primase complex	0.0511559	0	GO:0043933 macromolecular complex subunit organization	0.0881792	0	GO:0019692 deoxyribose phosphate metabolic process	0.0875959	0	GO:0006261 DNA-dependent DNA replication	0.0783458	0	%AA_Q	0.0835601	0	GO:0035433 acetate transmembrane transport	0.0815789	0	GO:0006351 transcription, DNA-templated	0.111495	0	GO:1901700 response to oxygen-containing compound	0.21009	0	GO:1900189 positive regulation of cell adhesion involved in single-species biofilm formation	0.0514829	0
GO:0090158 endoplasmic reticulum membrane organization	0.0774264	0	GO:0042440 pigment metabolic process	0.114402	0	GO:0010646 regulation of cell communication	0.0809327	0	GO:0015980 energy derivation by oxidation of organic compounds	0.0868174	0	GO:0003933 GTP cyclohydrolase activity	0.0511559	0	GO:0007096 regulation of exit from mitosis	0.0888049	0	GO:0061157 mRNA destabilization	0.0875959	0	GO:0045936 negative regulation of phosphate metabolic process	0.0784192	0	GO:0006310 DNA recombination	0.0846615	0	GO:0099587 inorganic ion import across plasma membrane	0.0815789	0	GO:0032879 regulation of localization	0.112628	0	GO:0005488 binding	0.21077	0	GO:1900192 positive regulation of single-species biofilm formation	0.0514829	0
GO:0072529 pyrimidine-containing compound catabolic process	0.0774264	0	GO:0044391 ribosomal subunit	0.120232	0	GO:0000747 conjugation with cellular fusion	0.0819999	0	GO:0055114 oxidation-reduction process	0.087458	0	GO:0000010 trans-hexaprenyltranstransferase activity	0.0511559	0	GO:0046434 organophosphate catabolic process	0.0888049	0	GO:0046385 deoxyribose phosphate biosynthetic process	0.0875959	0	GO:0010563 negative regulation of phosphorus metabolic process	0.0784192	0	GO:0006950 response to stress	0.0852567	0	GO:0031062 positive regulation of histone methylation	0.0815789	0	GO:0044092 negative regulation of molecular function	0.112628	0	GO:0043413 macromolecule glycosylation	0.214546	0	GO:1900190 regulation of single-species biofilm formation	0.0514829	0
GO:0046710 GDP metabolic process	0.0774264	0	GO:0006820 anion transport	0.120232	0	GO:0000746 conjugation	0.0819999	0	GO:0045893 positive regulation of transcription, DNA-templated	0.091039	0	GO:0006729 tetrahydrobiopterin biosynthetic process	0.0511559	0	GO:0009396 folic acid-containing compound biosynthetic process	0.0888049	0	GO:0042744 hydrogen peroxide catabolic process	0.0875959	0	GO:0032989 cellular component morphogenesis	0.0784192	0	CDS_PARS_RNAstructure	0.0868339	0	GO:0046130 purine ribonucleoside catabolic process	0.0815789	0	GO:0070011 peptidase activity, acting on L-amino acid peptides	0.112628	0	GO:0006486 protein glycosylation	0.214546	0	GO:0070988 demethylation	0.0514829	0
GO:0000996 core DNA-dependent RNA polymerase binding promoter specificity activity	0.0774264	0	GO:0046486 glycerolipid metabolic process	0.120845	0	%AA_V	0.0839464	0	GO:1902680 positive regulation of RNA biosynthetic process	0.091039	0	GO:0090307 mitotic spindle assembly	0.0511559	0	GO:0000741 karyogamy	0.0888049	0	GO:0043562 cellular response to nitrogen levels	0.0875959	0	GO:0022414 reproductive process	0.0792313	0	%AA_F	0.0869847	0	GO:0004149 dihydrolipoyllysine-residue succinyltransferase activity	0.0815789	0	GO:0046916 cellular transition metal ion homeostasis	0.112996	0	GO:0031974 membrane-enclosed lumen	0.21886	0	GO:0034993 LINC complex	0.0514829	0
GO:0008271 secondary active sulfate transmembrane transporter activity	0.0774264	0	GO:0015630 microtubule cytoskeleton	0.120845	0	GO:0055080 cation homeostasis	0.0853528	0	GO:1903508 positive regulation of nucleic acid-templated transcription	0.091039	0	GO:0034204 lipid translocation	0.0511559	0	GO:0042559 pteridine-containing compound biosynthetic process	0.0888049	0	GO:0061158 3'-UTR-mediated mRNA destabilization	0.0875959	0	GO:0019866 organelle inner membrane	0.0808255	0	%Proteinturn	0.0869855	0	GO:0051793 medium-chain fatty acid catabolic process	0.0815789	0	GO:0050789 regulation of biological process	0.114049	0	GO:0043233 organelle lumen	0.21886	0	GO:0070989 oxidative demethylation	0.0514829	0
GO:0071033 nuclear retention of pre-mRNA at the site of transcription	0.0774264	0	GO:0048193 Golgi vesicle transport	0.125257	0	GO:0005829 cytosol	0.0859087	0	GO:0044763 single-organism cellular process	0.0925918	0	GO:0090062 regulation of trehalose metabolic process	0.0511559	0	GO:0005635 nuclear envelope	0.089109	0	GO:0009202 deoxyribonucleoside triphosphate biosynthetic process	0.0875959	0	%AA_M	0.0808438	0	GO:0042623 ATPase activity, coupled	0.0885469	0	GO:0042454 ribonucleoside catabolic process	0.0815789	0	GO:0030474 spindle pole body duplication	0.118016	0	GO:0070013 intracellular organelle lumen	0.21886	0	GO:0018016 N-terminal peptidyl-proline dimethylation	0.0514829	0
GO:0033676 double-stranded DNA-dependent ATPase activity	0.0774264	0	GO:0043254 regulation of protein complex assembly	0.12858	0	GO:0043248 proteasome assembly	0.0863955	0	GO:0000987 core promoter proximal region sequence-specific DNA binding	0.0937441	0	GO:0035372 protein localization to microtubule	0.0511559	0	GO:0098813 nuclear chromosome segregation	0.0916692	0	GO:0035859 Seh1-associated complex	0.0875959	0	GO:0000003 reproduction	0.0814618	0	GO:0000183 chromatin silencing at rDNA	0.088629	0	GO:0006569 tryptophan catabolic process	0.0815789	0	GO:0006928 movement of cell or subcellular component	0.118016	0	GO:0051028 mRNA transport	0.218979	0	GO:0033676 double-stranded DNA-dependent ATPase activity	0.0514829	0
GO:0019702 protein-arginine N5-methyltransferase activity	0.0774264	0	GO:0071852 fungal-type cell wall organization or biogenesis	0.132419	0	GO:0030466 chromatin silencing at silent mating-type cassette	0.0863955	0	GO:0001159 core promoter proximal region DNA binding	0.0937441	0	GO:0032453 histone demethylase activity (H3-K4 specific)	0.0511559	0	GO:0044444 cytoplasmic part	0.0919082	0	GO:0016560 protein import into peroxisome matrix, docking	0.0875959	0	GO:0031090 organelle membrane	0.0821175	0	GO:0031625 ubiquitin protein ligase binding	0.088629	0	GO:0051480 regulation of cytosolic calcium ion concentration	0.0815789	0	GO:0050661 NADP binding	0.118016	0	GO:0010008 endosome membrane	0.218979	0	GO:0000751 mitotic cell cycle G1 arrest in response to pheromone	0.0514829	0
GO:0001044 mitochondrial RNA polymerase regulatory region sequence-specific DNA binding	0.0774264	0	GO:0008509 anion transmembrane transporter activity	0.134888	0	GO:0055065 metal ion homeostasis	0.0867018	0	%AA_N	0.0949044	0	GO:0005825 half bridge of spindle pole body	0.0511559	0	%AA_S	0.0939635	0	GO:1900090 positive regulation of inositol biosynthetic process	0.0875959	0	GO:0044428 nuclear part	0.0827228	0	GO:0044389 ubiquitin-like protein ligase binding	0.088629	0	GO:0016229 steroid dehydrogenase activity	0.0815789	0	GO:0046889 positive regulation of lipid biosynthetic process	0.118016	0	GO:0043234 protein complex	0.219664	0	GO:0042989 sequestering of actin monomers	0.0514829	0
GO:0072334 UDP-galactose transmembrane transport	0.0774264	0	GO:0015711 organic anion transport	0.135038	0	GO:0005819 spindle	0.0878593	0	GO:1904659 glucose transmembrane transport	0.0994823	0	GO:0010571 positive regulation of nuclear cell cycle DNA replication	0.0511559	0	GO:0006760 folic acid-containing compound metabolic process	0.0964929	0	GO:2000303 regulation of ceramide biosynthetic process	0.0875959	0	GO:0044237 cellular metabolic process	0.0852269	0	GO:0032182 ubiquitin-like protein binding	0.088629	0	GO:0009136 purine nucleoside diphosphate biosynthetic process	0.0815789	0	GO:0051347 positive regulation of transferase activity	0.118016	0	GO:0070727 cellular macromolecule localization	0.221156	0	GO:0001198 negative regulation of mating-type specific transcription from RNA polymerase II promoter	0.0514829	0
GO:0034764 positive regulation of transmembrane transport	0.0774264	0	GO:0005981 regulation of glycogen catabolic process	0.141967	0	GO:0007088 regulation of mitotic nuclear division	0.0879134	0	GO:0035428 hexose transmembrane transport	0.0994823	0	GO:0006311 meiotic gene conversion	0.0511559	0	GO:0042558 pteridine-containing compound metabolic process	0.0964929	0	GO:0015116 sulfate transmembrane transporter activity	0.0875959	0	GO:0043228 non-membrane-bounded organelle	0.0856848	0	GO:0030120 vesicle coat	0.088629	0	GO:0071211 protein targeting to vacuole involved in autophagy	0.0815789	0	GO:0045834 positive regulation of lipid metabolic process	0.118016	0	GO:0009101 glycoprotein biosynthetic process	0.227774	0	GO:0047964 glyoxylate reductase activity	0.0514829	0
GO:0071244 cellular response to carbon dioxide	0.0774264	0	GO:0051090 regulation of sequence-specific DNA binding transcription factor activity	0.141967	0	GO:0000314 organellar small ribosomal subunit	0.0879134	0	GO:0003756 protein disulfide isomerase activity	0.0994823	0	GO:0050334 thiaminase activity	0.0511559	0	GO:0044815 DNA packaging complex	0.0964929	0	GO:0050779 RNA destabilization	0.0875959	0	GO:0043232 intracellular non-membrane-bounded organelle	0.0856848	0	GO:0043130 ubiquitin binding	0.088629	0	GO:0017110 nucleoside-diphosphatase activity	0.0815789	0	GO:0000741 karyogamy	0.118016	0	GO:0016052 carbohydrate catabolic process	0.227774	0	GO:0030267 glyoxylate reductase (NADP) activity	0.0514829	0
GO:1902274 positive regulation of (R)-carnitine transmembrane transport	0.0774264	0	GO:0000753 cell morphogenesis involved in conjugation with cellular fusion	0.141967	0	GO:0019207 kinase regulator activity	0.0879134	0	GO:0016556 mRNA modification	0.0994823	0	GO:0010696 positive regulation of spindle pole body separation	0.0511559	0	GO:0006334 nucleosome assembly	0.0964929	0	GO:0008526 phosphatidylinositol transporter activity	0.0875959	0	GO:2000113 negative regulation of cellular macromolecule biosynthetic process	0.0862672	0	GO:0016671 oxidoreductase activity, acting on a sulfur group of donors, disulfide as acceptor	0.088629	0	GO:0004198 calcium-dependent cysteine-type endopeptidase activity	0.0815789	0	GO:0010038 response to metal ion	0.118016	0	GO:0055076 transition metal ion homeostasis	0.227774	0	GO:0004143 diacylglycerol kinase activity	0.0514829	0
GO:0043173 nucleotide salvage	0.0774264	0	GO:0018548 pentaerythritol trinitrate reductase activity	0.141967	0	GO:0005763 mitochondrial small ribosomal subunit	0.0879134	0	GO:0019203 carbohydrate phosphatase activity	0.0994823	0	GO:0046495 nicotinamide riboside metabolic process	0.0511559	0	GO:0060260 regulation of transcription initiation from RNA polymerase II promoter	0.0964929	0	GO:0033101 cellular bud membrane	0.0875959	0	GO:0010558 negative regulation of macromolecule biosynthetic process	0.0862672	0	GO:0003678 DNA helicase activity	0.088629	0	GO:0019441 tryptophan catabolic process to kynurenine	0.0815789	0	GO:0031365 N-terminal protein amino acid modification	0.118016	0	GO:0005976 polysaccharide metabolic process	0.227774	0	GO:0034992 microtubule organizing center attachment site	0.0514829	0
GO:0043456 regulation of pentose-phosphate shunt	0.0774264	0	GO:0009411 response to UV	0.141967	0	GO:0006950 response to stress	0.0885544	0	GO:0045002 double-strand break repair via single-strand annealing	0.0994823	0	GO:0010568 regulation of budding cell apical bud growth	0.0511559	0	GO:0006825 copper ion transport	0.0964929	0	GO:0016114 terpenoid biosynthetic process	0.0875959	0	GO:0071555 cell wall organization	0.086969	0	GO:0000746 conjugation	0.0895066	0	GO:0070181 small ribosomal subunit rRNA binding	0.0815789	0	GO:0046020 negative regulation of transcription from RNA polymerase II promoter by pheromones	0.118016	0	GO:0010256 endomembrane system organization	0.227774	0	GO:0004430 1-phosphatidylinositol 4-kinase activity	0.0514829	0
GO:0015761 mannose transport	0.0774264	0	GO:0009164 nucleoside catabolic process	0.141967	0	GO:0071900 regulation of protein serine/threonine kinase activity	0.0887668	0	GO:0015145 monosaccharide transmembrane transporter activity	0.0994823	0	GO:0017150 tRNA dihydrouridine synthase activity	0.0511559	0	GO:2000142 regulation of DNA-templated transcription, initiation	0.0964929	0	GO:0008525 phosphatidylcholine transporter activity	0.0875959	0	GO:0045229 external encapsulating structure organization	0.086969	0	GO:0000747 conjugation with cellular fusion	0.0895066	0	GO:0004401 histidinol-phosphatase activity	0.0815789	0	GO:0005688 U6 snRNP	0.118016	0	GO:0016788 hydrolase activity, acting on ester bonds	0.230586	0	GO:0071885 N-terminal protein N-methyltransferase activity	0.0514829	0
GO:0032264 IMP salvage	0.0774264	0	GO:0046501 protoporphyrinogen IX metabolic process	0.141967	0	GO:0046488 phosphatidylinositol metabolic process	0.0887668	0	GO:0046323 glucose import	0.0994823	0	GO:0017116 single-stranded DNA-dependent ATP-dependent DNA helicase activity	0.0511559	0	GO:0032879 regulation of localization	0.0994812	0	GO:0000813 ESCRT I complex	0.0875959	0	GO:0033674 positive regulation of kinase activity	0.087709	0	GO:0005199 structural constituent of cell wall	0.0909273	0	GO:0004343 glucosamine 6-phosphate N-acetyltransferase activity	0.0815789	0	GO:0030137 COPI-coated vesicle	0.118016	0	GO:0046395 carboxylic acid catabolic process	0.232137	0	GO:0035952 negative regulation of oligopeptide transport by negative regulation of transcription from RNA polymerase II promoter	0.0514829	0
GO:0043455 regulation of secondary metabolic process	0.0774264	0	GO:0018063 cytochrome c-heme linkage	0.141967	0	GO:0004721 phosphoprotein phosphatase activity	0.0887668	0	GO:0005355 glucose transmembrane transporter activity	0.0994823	0	GO:0035998 7,8-dihydroneopterin 3'-triphosphate biosynthetic process	0.0511559	0	Num_SNPs	0.100579	0	GO:1990529 glycosylphosphatidylinositol-mannosyltransferase I complex	0.0875959	0	GO:0042625 ATPase coupled ion transmembrane transporter activity	0.087709	0	GO:0033617 mitochondrial respiratory chain complex IV assembly	0.0909273	0	GO:0006152 purine nucleoside catabolic process	0.0815789	0	GO:0030705 cytoskeleton-dependent intracellular transport	0.118016	0	GO:0016054 organic acid catabolic process	0.232137	0	GO:0010810 regulation of cell-substrate adhesion	0.0514829	0
GO:0071163 DNA replication preinitiation complex assembly	0.0774264	0	GO:0019781 NEDD8 activating enzyme activity	0.141967	0	GO:0048878 chemical homeostasis	0.0888885	0	GO:0055069 zinc ion homeostasis	0.0994823	0	GO:0019629 propionate catabolic process, 2-methylcitrate cycle	0.0511559	0	GO:0022624 proteasome accessory complex	0.104119	0	GO:0017157 regulation of exocytosis	0.0875959	0	GO:0022853 active ion transmembrane transporter activity	0.087709	0	GO:0000982 transcription factor activity, RNA polymerase II core promoter proximal region sequence-specific binding	0.0909273	0	GO:0033512 L-lysine catabolic process to acetyl-CoA via saccharopine	0.0815789	0	GO:0072593 reactive oxygen species metabolic process	0.118016	0	GO:0043933 macromolecular complex subunit organization	0.233293	0	GO:0035516 oxidative DNA demethylase activity	0.0514829	0
GO:0000252 C-3 sterol dehydrogenase (C-4 sterol decarboxylase) activity	0.0774264	0	GO:0018342 protein prenylation	0.141967	0	GO:0015630 microtubule cytoskeleton	0.0903953	0	GO:0051223 regulation of protein transport	0.0994823	0	GO:0050440 2-methylcitrate synthase activity	0.0511559	0	GO:0005838 proteasome regulatory particle	0.104119	0	GO:0043967 histone H4 acetylation	0.0875959	0	GO:0019829 cation-transporting ATPase activity	0.087709	0	GO:0030154 cell differentiation	0.0910247	0	GO:0006824 cobalt ion transport	0.0815789	0	GO:0051300 spindle pole body organization	0.118016	0	GO:0016758 transferase activity, transferring hexosyl groups	0.236477	0	GO:0015151 alpha-glucoside transmembrane transporter activity	0.0514829	0
GO:1902267 regulation of polyamine transmembrane transport	0.0774264	0	GO:0015248 sterol transporter activity	0.141967	0	GO:0016741 transferase activity, transferring one-carbon groups	0.0903953	0	GO:0051119 sugar transmembrane transporter activity	0.0994823	0	GO:0042555 MCM complex	0.0511559	0	GO:0031902 late endosome membrane	0.104119	0	GO:0061133 endopeptidase activator activity	0.0875959	0	GO:0016558 protein import into peroxisome matrix	0.087709	0	GO:0048646 anatomical structure formation involved in morphogenesis	0.0916438	0	GO:0004662 CAAX-protein geranylgeranyltransferase activity	0.0815789	0	GO:0045996 negative regulation of transcription by pheromones	0.118016	0	GO:0044712 single-organism catabolic process	0.238982	0	GO:0008157 protein phosphatase 1 binding	0.0514829	0
GO:0051456 attachment of spindle microtubules to kinetochore involved in meiotic sister chromatid segregation	0.0774264	0	GO:0006020 inositol metabolic process	0.141967	0	GO:0019899 enzyme binding	0.0913514	0	GO:0015149 hexose transmembrane transporter activity	0.0994823	0	GO:0031118 rRNA pseudouridine synthesis	0.0511559	0	GO:1903320 regulation of protein modification by small protein conjugation or removal	0.104119	0	GO:0006556 S-adenosylmethionine biosynthetic process	0.0875959	0	GO:0045860 positive regulation of protein kinase activity	0.087709	0	GO:0036003 positive regulation of transcription from RNA polymerase II promoter in response to stress	0.0918282	0	GO:0006086 acetyl-CoA biosynthetic process from pyruvate	0.0815789	0	GO:0042276 error-prone translesion synthesis	0.118016	0	GO:0017111 nucleoside-triphosphatase activity	0.238982	0	GO:0032958 inositol phosphate biosynthetic process	0.0514829	0
GO:0006033 chitin localization	0.0774264	0	GO:0019902 phosphatase binding	0.141967	0	GO:0003677 DNA binding	0.0924256	0	GO:0044275 cellular carbohydrate catabolic process	0.0994823	0	GO:0098553 lumenal side of endoplasmic reticulum membrane	0.0511559	0	GO:0044087 regulation of cellular component biogenesis	0.10748	0	GO:0009212 pyrimidine deoxyribonucleoside triphosphate biosynthetic process	0.0875959	0	GO:0006878 cellular copper ion homeostasis	0.087709	0	GO:0043620 regulation of DNA-templated transcription in response to stress	0.0918282	0	GO:2000677 regulation of transcription regulatory region DNA binding	0.0815789	0	GO:0016895 exodeoxyribonuclease activity, producing 5'-phosphomonoesters	0.118016	0	GO:0070085 glycosylation	0.240794	0	GO:0004512 inositol-3-phosphate synthase activity	0.0514829	0
GO:0042365 water-soluble vitamin catabolic process	0.0774264	0	GO:0006560 proline metabolic process	0.141967	0	GO:1902582 single-organism intracellular transport	0.0935165	0	GO:0005351 sugar:proton symporter activity	0.0994823	0	GO:0071556 integral component of lumenal side of endoplasmic reticulum membrane	0.0511559	0	GO:0016538 cyclin-dependent protein serine/threonine kinase regulator activity	0.111683	0	GO:0003873 6-phosphofructo-2-kinase activity	0.0875959	0	GO:0071702 organic substance transport	0.0877474	0	GO:0012501 programmed cell death	0.0918282	0	GO:0034458 3'-5' RNA helicase activity	0.0815789	0	GO:0034486 vacuolar transmembrane transport	0.118784	0	GO:0030447 filamentous growth	0.240794	0	GO:0042826 histone deacetylase binding	0.0514829	0
GO:0003876 AMP deaminase activity	0.0774264	0	GO:1901006 ubiquinone-6 biosynthetic process	0.141967	0	GO:0051604 protein maturation	0.0935282	0	GO:0009251 glucan catabolic process	0.0994823	0	GO:0034986 iron chaperone activity	0.0511559	0	GO:0007052 mitotic spindle organization	0.111683	0	GO:1900375 positive regulation of inositol biosynthetic process by positive regulation of transcription from RNA polymerase II promoter	0.0875959	0	GO:0032268 regulation of cellular protein metabolic process	0.0879822	0	GO:0072659 protein localization to plasma membrane	0.0918282	0	GO:0004652 polynucleotide adenylyltransferase activity	0.0815789	0	GO:0044746 amino acid transmembrane export	0.118784	0	GO:0015031 protein transport	0.244039	0	GO:0015088 copper uptake transmembrane transporter activity	0.0514829	0
GO:0072364 regulation of cellular ketone metabolic process by regulation of transcription from RNA polymerase II promoter	0.0774264	0	GO:0008525 phosphatidylcholine transporter activity	0.141967	0	GO:1901615 organic hydroxy compound metabolic process	0.0949465	0	GO:0034965 intronic box C/D snoRNA processing	0.0994823	0	GO:0003997 acyl-CoA oxidase activity	0.0511559	0	GO:0000472 endonucleolytic cleavage to generate mature 5'-end of SSU-rRNA from (SSU-rRNA, 5.8S rRNA, LSU-rRNA)	0.111683	0	GO:0006660 phosphatidylserine catabolic process	0.0875959	0	GO:0051246 regulation of protein metabolic process	0.0897181	0	GO:0001403 invasive growth in response to glucose limitation	0.0918282	0	GO:0046570 methylthioribulose 1-phosphate dehydratase activity	0.0815789	0	GO:0051920 peroxiredoxin activity	0.118784	0	GO:0009272 fungal-type cell wall biogenesis	0.245088	0	GO:0047623 adenosine-phosphate deaminase activity	0.0514829	0
GO:0005459 UDP-galactose transmembrane transporter activity	0.0774264	0	GO:1901004 ubiquinone-6 metabolic process	0.141967	0	GO:0004536 deoxyribonuclease activity	0.0960358	0	GO:0031647 regulation of protein stability	0.0994823	0	GO:0009229 thiamine diphosphate biosynthetic process	0.0511559	0	GO:0005643 nuclear pore	0.111683	0	GO:0070993 translation preinitiation complex	0.0875959	0	GO:0009059 macromolecule biosynthetic process	0.0909498	0	GO:1990778 protein localization to cell periphery	0.0918282	0	GO:0050613 delta14-sterol reductase activity	0.0815789	0	GO:0006614 SRP-dependent cotranslational protein targeting to membrane	0.118784	0	GO:0005525 GTP binding	0.245088	0	GO:0000100 S-methylmethionine transmembrane transporter activity	0.0514829	0
GO:0006391 transcription initiation from mitochondrial promoter	0.0774264	0	GO:0006751 glutathione catabolic process	0.141967	0	GO:0044454 nuclear chromosome part	0.0970992	0	GO:0005402 cation:sugar symporter activity	0.0994823	0	GO:0050483 IMP 5'-nucleotidase activity	0.0511559	0	GO:0070651 nonfunctional rRNA decay	0.111683	0	GO:0070567 cytidylyltransferase activity	0.0875959	0	%AA_S	0.0932696	0	GO:0046890 regulation of lipid biosynthetic process	0.0918282	0	GO:1901069 guanosine-containing compound catabolic process	0.0815789	0	GO:0008379 thioredoxin peroxidase activity	0.118784	0	GO:0032549 ribonucleoside binding	0.245088	0	GO:0032451 demethylase activity	0.0514829	0
GO:0006077 (1->6)-beta-D-glucan metabolic process	0.0774264	0	GO:0004331 fructose-2,6-bisphosphate 2-phosphatase activity	0.141967	0	GO:0019941 modification-dependent protein catabolic process	0.0996518	0	GO:0016864 intramolecular oxidoreductase activity, transposing S-S bonds	0.0994823	0	GO:0047804 cysteine-S-conjugate beta-lyase activity	0.0511559	0	GO:0000079 regulation of cyclin-dependent protein serine/threonine kinase activity	0.111683	0	GO:0010950 positive regulation of endopeptidase activity	0.0875959	0	GO:0006338 chromatin remodeling	0.0933925	0	GO:0006915 apoptotic process	0.0918282	0	GO:0060401 cytosolic calcium ion transport	0.0815789	0	GO:0016706 oxidoreductase activity, acting on paired donors, with incorporation or reduction of molecular oxygen, 2-oxoglutarate as one donor, and incorporation of one atom each of oxygen into both donors	0.118784	0	GO:0001882 nucleoside binding	0.245088	0	GO:0016156 fumarate reductase (NADH) activity	0.0514829	0
GO:0008251 tRNA-specific adenosine deaminase activity	0.0774264	0	GO:1901658 glycosyl compound catabolic process	0.141967	0	GO:0006511 ubiquitin-dependent protein catabolic process	0.0996518	0	GO:1900402 regulation of carbohydrate metabolic process by regulation of transcription from RNA polymerase II promoter	0.0994823	0	GO:0009111 vitamin catabolic process	0.0511559	0	GO:0043570 maintenance of DNA repeat elements	0.111683	0	GO:0045251 electron transfer flavoprotein complex	0.0875959	0	GO:0006461 protein complex assembly	0.0937376	0	GO:0008219 cell death	0.0918282	0	GO:0016639 oxidoreductase activity, acting on the CH-NH2 group of donors, NAD or NADP as acceptor	0.0815789	0	GO:0001324 age-dependent response to oxidative stress involved in chronological cell aging	0.118784	0	GO:0032550 purine ribonucleoside binding	0.245088	0	GO:0031418 L-ascorbic acid binding	0.0514829	0
GO:0016229 steroid dehydrogenase activity	0.0774264	0	GO:0051446 positive regulation of meiotic cell cycle	0.141967	0	%Helical	0.102783	0	GO:0031070 intronic snoRNA processing	0.0994823	0	GO:0004568 chitinase activity	0.0511559	0	GO:0046112 nucleobase biosynthetic process	0.111683	0	GO:0010952 positive regulation of peptidase activity	0.0875959	0	GO:0030864 cortical actin cytoskeleton	0.0947523	0	GO:0043618 regulation of transcription from RNA polymerase II promoter in response to stress	0.0918282	0	GO:1902656 calcium ion import into cytosol	0.0815789	0	GO:0030060 L-malate dehydrogenase activity	0.118784	0	GO:0032561 guanyl ribonucleotide binding	0.245088	0	GO:0071850 mitotic cell cycle arrest	0.0514829	0
GO:0005353 fructose transmembrane transporter activity	0.0774264	0	GO:0097194 execution phase of apoptosis	0.141967	0	GO:0044092 negative regulation of molecular function	0.103574	0	GO:0010528 regulation of transposition	0.0994823	0	GO:0033540 fatty acid beta-oxidation using acyl-CoA oxidase	0.0511559	0	%AA_H	0.113469	0	GO:0016504 peptidase activator activity	0.0875959	0	GO:0008234 cysteine-type peptidase activity	0.0947523	0	GO:0000428 DNA-directed RNA polymerase complex	0.0919299	0	GO:0033764 steroid dehydrogenase activity, acting on the CH-OH group of donors, NAD or NADP as acceptor	0.0815789	0	GO:0042724 thiamine-containing compound biosynthetic process	0.118784	0	GO:0019001 guanyl nucleotide binding	0.245088	0	GO:0010393 galacturonan metabolic process	0.0514829	0
GO:0008272 sulfate transport	0.0774264	0	GO:0000055 ribosomal large subunit export from nucleus	0.141967	0	GO:0051651 maintenance of location in cell	0.105564	0	GO:0006882 cellular zinc ion homeostasis	0.0994823	0	GO:0005469 succinate:fumarate antiporter activity	0.0511559	0	SNP-LOW	0.114427	0	GO:1902767 isoprenoid biosynthetic process via mevalonate	0.0875959	0	GO:0015399 primary active transmembrane transporter activity	0.0947523	0	GO:0030880 RNA polymerase complex	0.0919299	0	GO:0098657 import into cell	0.0815789	0	GO:0006108 malate metabolic process	0.118784	0	GO:0001883 purine nucleoside binding	0.245088	0	GO:0016618 hydroxypyruvate reductase activity	0.0514829	0
GO:0009111 vitamin catabolic process	0.0774264	0	GO:0003873 6-phosphofructo-2-kinase activity	0.141967	0	GO:0016798 hydrolase activity, acting on glycosyl bonds	0.105564	0	GO:0051254 positive regulation of RNA metabolic process	0.0998509	0	GO:2001033 negative regulation of double-strand break repair via nonhomologous end joining	0.0511559	0	GO:0005515 protein binding	0.115268	0	GO:0015740 C4-dicarboxylate transport	0.0875959	0	GO:0015405 P-P-bond-hydrolysis-driven transmembrane transporter activity	0.0947523	0	SNP-HIGH	0.0947383	0	GO:0018063 cytochrome c-heme linkage	0.0815789	0	GO:0009228 thiamine biosynthetic process	0.118784	0	%Proteinturn	0.246625	0	GO:0008686 3,4-dihydroxy-2-butanone-4-phosphate synthase activity	0.0514829	0
GO:0008902 hydroxymethylpyrimidine kinase activity	0.0774264	0	GO:0008526 phosphatidylinositol transporter activity	0.141967	0	GO:0009055 electron carrier activity	0.105564	0	GO:0051174 regulation of phosphorus metabolic process	0.100536	0	GO:0018282 metal incorporation into metallo-sulfur cluster	0.0511559	0	GO:0016072 rRNA metabolic process	0.115321	0	GO:0070548 L-glutamine aminotransferase activity	0.0875959	0	GO:0006098 pentose-phosphate shunt	0.0958676	0	GO:0031981 nuclear lumen	0.0960248	0	GO:0060402 calcium ion transport into cytosol	0.0815789	0	GO:2000222 positive regulation of pseudohyphal growth	0.118784	0	GO:0006623 protein targeting to vacuole	0.249359	0	GO:0015606 spermidine transmembrane transporter activity	0.0514829	0
GO:0007098 centrosome cycle	0.0774264	0	GO:0001167 RNA polymerase I transcription factor activity, sequence-specific DNA binding	0.141967	0	GO:0090329 regulation of DNA-dependent DNA replication	0.105564	0	GO:0019220 regulation of phosphate metabolic process	0.100536	0	GO:0071592 nicotinic acid riboside biosynthetic process	0.0511559	0	GO:0005198 structural molecule activity	0.11714	0	GO:1900060 negative regulation of ceramide biosynthetic process	0.0875959	0	GO:0046184 aldehyde biosynthetic process	0.0958676	0	GO:0044437 vacuolar part	0.0964673	0	GO:0015087 cobalt ion transmembrane transporter activity	0.0815789	0	GO:2000221 negative regulation of pseudohyphal growth	0.118784	0	GO:0009100 glycoprotein metabolic process	0.249359	0	GO:0031543 peptidyl-proline dioxygenase activity	0.0514829	0
GO:0004089 carbonate dehydratase activity	0.0774264	0	GO:0008443 phosphofructokinase activity	0.141967	0	GO:0006879 cellular iron ion homeostasis	0.105564	0	GO:0051128 regulation of cellular component organization	0.102121	0	GO:0016634 oxidoreductase activity, acting on the CH-CH group of donors, oxygen as acceptor	0.0511559	0	GO:1904029 regulation of cyclin-dependent protein kinase activity	0.119186	0	GO:0004331 fructose-2,6-bisphosphate 2-phosphatase activity	0.0875959	0	GO:0004033 aldo-keto reductase (NADP) activity	0.0958676	0	GO:0040029 regulation of gene expression, epigenetic	0.0993196	0	GO:0043044 ATP-dependent chromatin remodeling	0.0830244	0	GO:0004012 phospholipid-translocating ATPase activity	0.118784	0	GO:0016197 endosomal transport	0.249359	0	GO:0000104 succinate dehydrogenase activity	0.0514829	0
GO:0008972 phosphomethylpyrimidine kinase activity	0.0774264	0	GO:0006000 fructose metabolic process	0.141967	0	GO:0035753 maintenance of DNA trinucleotide repeats	0.106283	0	GO:0031329 regulation of cellular catabolic process	0.104625	0	GO:0010898 positive regulation of triglyceride catabolic process	0.0511559	0	GO:0009112 nucleobase metabolic process	0.119186	0	GO:0009394 2'-deoxyribonucleotide metabolic process	0.0875959	0	GO:0019212 phosphatase inhibitor activity	0.0958676	0	GO:0006271 DNA strand elongation involved in DNA replication	0.100045	0	GO:0000079 regulation of cyclin-dependent protein serine/threonine kinase activity	0.0830244	0	GO:0030307 positive regulation of cell growth	0.118784	0	GO:0065002 intracellular protein transmembrane transport	0.249359	0	GO:0005375 copper ion transmembrane transporter activity	0.0514829	0
GO:0042500 aspartic endopeptidase activity, intramembrane cleaving	0.0774264	0	GO:0001046 core promoter sequence-specific DNA binding	0.141967	0	GO:0016925 protein sumoylation	0.106283	0	GO:0048869 cellular developmental process	0.10674	0	GO:0035101 FACT complex	0.0511559	0	GO:0043248 proteasome assembly	0.119186	0	GO:0005657 replication fork	0.0892192	0	GO:1903322 positive regulation of protein modification by small protein conjugation or removal	0.0958676	0	GO:0043570 maintenance of DNA repeat elements	0.100045	0	GO:1901701 cellular response to oxygen-containing compound	0.0830244	0	GO:0046686 response to cadmium ion	0.118784	0	GO:0044440 endosomal part	0.249359	0	GO:0032545 CURI complex	0.0514829	0
GO:0034767 positive regulation of ion transmembrane transport	0.0774264	0	GO:0006561 proline biosynthetic process	0.141967	0	GO:0042134 rRNA primary transcript binding	0.106283	0	GO:0005737 cytoplasm	0.110699	0	GO:0034993 LINC complex	0.0511559	0	GO:0008017 microtubule binding	0.119186	0	GO:0046488 phosphatidylinositol metabolic process	0.0892192	0	GO:0035065 regulation of histone acetylation	0.0958676	0	GO:0000479 endonucleolytic cleavage of tricistronic rRNA transcript (SSU-rRNA, 5.8S rRNA, LSU-rRNA)	0.100045	0	GO:0016538 cyclin-dependent protein serine/threonine kinase regulator activity	0.0830244	0	GO:0007050 cell cycle arrest	0.118784	0	GO:0072666 establishment of protein localization to vacuole	0.249359	0	GO:0004861 cyclin-dependent protein serine/threonine kinase inhibitor activity	0.0514829	0
GO:0006178 guanine salvage	0.0774264	0	GO:0007323 peptide pheromone maturation	0.141967	0	GO:0034965 intronic box C/D snoRNA processing	0.106283	0	GO:0044262 cellular carbohydrate metabolic process	0.115078	0	GO:0008521 acetyl-CoA transporter activity	0.0511559	0	GO:0033617 mitochondrial respiratory chain complex IV assembly	0.119186	0	GO:0004175 endopeptidase activity	0.0892192	0	GO:0042816 vitamin B6 metabolic process	0.0958676	0	GO:0006749 glutathione metabolic process	0.100045	0	GO:0010033 response to organic substance	0.0841752	0	GO:0006613 cotranslational protein targeting to membrane	0.118784	0	GO:0006508 proteolysis	0.255849	0	GO:0070064 proline-rich region binding	0.0514829	0
GO:0047623 adenosine-phosphate deaminase activity	0.0774264	0	GO:1901858 regulation of mitochondrial DNA metabolic process	0.141967	0	GO:0034067 protein localization to Golgi apparatus	0.106283	0	GO:0001135 transcription factor activity, RNA polymerase II transcription factor recruiting	0.115094	0	GO:0019450 L-cysteine catabolic process to pyruvate	0.0511559	0	GO:0031298 replication fork protection complex	0.119186	0	GO:0015748 organophosphate ester transport	0.0892192	0	GO:0042822 pyridoxal phosphate metabolic process	0.0958676	0	GO:0000478 endonucleolytic cleavage involved in rRNA processing	0.100045	0	GO:0046488 phosphatidylinositol metabolic process	0.0855804	0	GO:0006772 thiamine metabolic process	0.118784	0	%AA_V	0.257765	0	GO:0052742 phosphatidylinositol kinase activity	0.0514829	0
GO:0033764 steroid dehydrogenase activity, acting on the CH-OH group of donors, NAD or NADP as acceptor	0.0774264	0	GO:0090297 positive regulation of mitochondrial DNA replication	0.141967	0	GO:0031070 intronic snoRNA processing	0.106283	0	GO:0034963 box C/D snoRNA processing	0.115094	0	GO:0032177 cellular bud neck split septin rings	0.0511559	0	GO:0000966 RNA 5'-end processing	0.119186	0	GO:0004386 helicase activity	0.0892192	0	GO:2000758 positive regulation of peptidyl-lysine acetylation	0.0958676	0	GO:0006383 transcription from RNA polymerase III promoter	0.100045	0	GO:0005743 mitochondrial inner membrane	0.0857104	0	GO:0032973 amino acid export	0.118784	0	GO:0072665 protein localization to vacuole	0.262036	0	GO:0005352 alpha-glucoside:proton symporter activity	0.0514829	0
GO:0071618 lysophosphatidylethanolamine acyltransferase activity	0.0774264	0	GO:0055129 L-proline biosynthetic process	0.141967	0	GO:0070001 aspartic-type peptidase activity	0.106283	0	GO:0046173 polyol biosynthetic process	0.115094	0	GO:0016724 oxidoreductase activity, oxidizing metal ions, oxygen as acceptor	0.0511559	0	GO:0007051 spindle organization	0.119186	0	GO:0042175 nuclear outer membrane-endoplasmic reticulum membrane network	0.0894634	0	GO:0000217 DNA secondary structure binding	0.0958676	0	GO:0000027 ribosomal large subunit assembly	0.100045	0	GO:1901566 organonitrogen compound biosynthetic process	0.0877029	0	GO:0070988 demethylation	0.118784	0	GO:0071806 protein transmembrane transport	0.262036	0	GO:0003785 actin monomer binding	0.0514829	0
GO:0033619 membrane protein proteolysis	0.0774264	0	GO:1903578 regulation of ATP metabolic process	0.141967	0	GO:0034963 box C/D snoRNA processing	0.106283	0	GO:0030681 multimeric ribonuclease P complex	0.115094	0	GO:0033897 ribonuclease T2 activity	0.0511559	0	GO:0000967 rRNA 5'-end processing	0.119186	0	5UTR_PARS_RNAstructure	0.0918037	0	GO:0019237 centromeric DNA binding	0.0958676	0	GO:0001134 transcription factor activity, transcription factor recruiting	0.100045	0	GO:0006790 sulfur compound metabolic process	0.0916714	0	GO:0036002 pre-mRNA binding	0.118784	0	GO:0055065 metal ion homeostasis	0.262036	0	GO:0051594 detection of glucose	0.0514829	0
GO:0047012 sterol-4-alpha-carboxylate 3-dehydrogenase (decarboxylating) activity	0.0774264	0	GO:0004683 calmodulin-dependent protein kinase activity	0.141967	0	GO:0008236 serine-type peptidase activity	0.106283	0	GO:0032806 carboxy-terminal domain protein kinase complex	0.115094	0	GO:0000309 nicotinamide-nucleotide adenylyltransferase activity	0.0511559	0	GO:0034471 ncRNA 5'-end processing	0.119186	0	GO:0031903 microbody membrane	0.0978477	0	GO:0006276 plasmid maintenance	0.0958676	0	GO:0042393 histone binding	0.100045	0	GO:0005488 binding	0.0927819	0	GO:0006573 valine metabolic process	0.118784	0	GO:0050794 regulation of cellular process	0.263149	0	GO:0003876 AMP deaminase activity	0.0514829	0
GO:0004619 phosphoglycerate mutase activity	0.0774264	0	GO:1901860 positive regulation of mitochondrial DNA metabolic process	0.141967	0	GO:0002790 peptide secretion	0.106283	0	GO:0033615 mitochondrial proton-transporting ATP synthase complex assembly	0.115094	0	GO:0015141 succinate transmembrane transporter activity	0.0511559	0	GO:0031503 protein complex localization	0.119186	0	GO:0017148 negative regulation of translation	0.0978477	0	GO:1904031 positive regulation of cyclin-dependent protein kinase activity	0.0958676	0	GO:0015197 peptide transporter activity	0.100045	0	GO:0065007 biological regulation	0.094251	0	GO:0043902 positive regulation of multi-organism process	0.118784	0	GO:0033365 protein localization to organelle	0.266429	0	GO:0080111 DNA demethylation	0.0514829	0
GO:0016857 racemase and epimerase activity, acting on carbohydrates and derivatives	0.0774264	0	GO:1990229 iron-sulfur cluster assembly complex	0.141967	0	GO:0000055 ribosomal large subunit export from nucleus	0.106283	0	GO:0015294 solute:cation symporter activity	0.115094	0	GO:0033204 ribonuclease P RNA binding	0.0511559	0	%AA_M	0.120029	0	GO:0043543 protein acylation	0.0978477	0	GO:0043487 regulation of RNA stability	0.0958676	0	GO:0010467 gene expression	0.100708	0	GO:0019866 organelle inner membrane	0.0982053	0	GO:0008250 oligosaccharyltransferase complex	0.118784	0	GO:0016817 hydrolase activity, acting on acid anhydrides	0.266429	0	GO:0004650 polygalacturonase activity	0.0514829	0
GO:0015116 sulfate transmembrane transporter activity	0.0774264	0	GO:0001168 transcription factor activity, RNA polymerase I upstream control element sequence-specific binding	0.141967	0	GO:0009306 protein secretion	0.106283	0	GO:0051537 2 iron, 2 sulfur cluster binding	0.115094	0	GO:0008061 chitin binding	0.0511559	0	GO:0044424 intracellular part	0.121012	0	GO:0005778 peroxisomal membrane	0.0978477	0	GO:0042721 mitochondrial inner membrane protein insertion complex	0.0958676	0	%AA_H	0.104926	0	GO:0008202 steroid metabolic process	0.0982503	0	GO:0006816 calcium ion transport	0.118784	0	GO:0016818 hydrolase activity, acting on acid anhydrides, in phosphorus-containing anhydrides	0.266429	0	GO:0046854 phosphatidylinositol phosphorylation	0.0514829	0
GO:0008569 ATP-dependent microtubule motor activity, minus-end-directed	0.0774264	0	GO:0010822 positive regulation of mitochondrion organization	0.141967	0	GO:0004190 aspartic-type endopeptidase activity	0.106283	0	GO:0043461 proton-transporting ATP synthase complex assembly	0.115094	0	GO:0051455 attachment of spindle microtubules to kinetochore involved in homologous chromosome segregation	0.0511559	0	GO:0006412 translation	0.126409	0	GO:0003677 DNA binding	0.0999355	0	GO:1901985 positive regulation of protein acetylation	0.0958676	0	GO:0005576 extracellular region	0.10526	0	GO:0016125 sterol metabolic process	0.0982503	0	GO:0031105 septin complex	0.118784	0	GO:0016462 pyrophosphatase activity	0.266429	0	GO:0042947 glucoside transmembrane transporter activity	0.0514829	0
GO:0015750 pentose transport	0.0774264	0	GO:0050821 protein stabilization	0.141967	0	GO:0042451 purine nucleoside biosynthetic process	0.106283	0	GO:1990822 basic amino acid transmembrane transport	0.115094	0	GO:0032176 split septin rings	0.0511559	0	GO:1902554 serine/threonine protein kinase complex	0.126629	0	GO:0009636 response to toxic substance	0.107593	0	GO:0008106 alcohol dehydrogenase (NADP+) activity	0.0958676	0	GO:1901564 organonitrogen compound metabolic process	0.106785	0	GO:0032592 integral component of mitochondrial membrane	0.0982503	0	GO:0008622 epsilon DNA polymerase complex	0.118784	0	median_IUPRED	0.266561	0	GO:0005776 autophagosome	0.0514829	0
GO:0051659 maintenance of mitochondrion location	0.0774264	0	GO:2000105 positive regulation of DNA-dependent DNA replication	0.141967	0	GO:0033967 box C/D snoRNA metabolic process	0.106283	0	GO:0006071 glycerol metabolic process	0.115094	0	GO:0006343 establishment of chromatin silencing	0.0511559	0	GO:0097576 vacuole fusion	0.126629	0	GO:0032392 DNA geometric change	0.112376	0	GO:0016840 carbon-nitrogen lyase activity	0.0958676	0	GO:0031225 anchored component of membrane	0.106988	0	GO:0072524 pyridine-containing compound metabolic process	0.0982503	0	GO:0016615 malate dehydrogenase activity	0.118784	0	GO:0009056 catabolic process	0.268797	0	GO:0035299 inositol pentakisphosphate 2-kinase activity	0.0514829	0
GO:0016854 racemase and epimerase activity	0.0774264	0	GO:0006003 fructose 2,6-bisphosphate metabolic process	0.141967	0	GO:0001558 regulation of cell growth	0.106283	0	GO:0070507 regulation of microtubule cytoskeleton organization	0.115094	0	GO:1903664 regulation of asexual reproduction	0.0511559	0	GO:0030162 regulation of proteolysis	0.126629	0	GO:0008361 regulation of cell size	0.112376	0	GO:0072488 ammonium transmembrane transport	0.0958676	0	GO:0006406 mRNA export from nucleus	0.106988	0	GO:0009058 biosynthetic process	0.0985558	0	GO:0070785 negative regulation of growth of unicellular organism as a thread of attached cells	0.118784	0	GO:0044459 plasma membrane part	0.282721	0	GO:0009593 detection of chemical stimulus	0.0514829	0
GO:0015165 pyrimidine nucleotide-sugar transmembrane transporter activity	0.0774264	0	GO:0019788 NEDD8 transferase activity	0.141967	0	GO:0016776 phosphotransferase activity, phosphate group as acceptor	0.106283	0	GO:0043601 nuclear replisome	0.115094	0	GO:0015876 acetyl-CoA transport	0.0511559	0	GO:0005484 SNAP receptor activity	0.126629	0	GO:0022607 cellular component assembly	0.11577	0	GO:0042823 pyridoxal phosphate biosynthetic process	0.0958676	0	GO:0001228 transcriptional activator activity, RNA polymerase II transcription regulatory region sequence-specific binding	0.106988	0	GO:0000002 mitochondrial genome maintenance	0.099581	0	GO:0000795 synaptonemal complex	0.118784	0	GO:1901565 organonitrogen compound catabolic process	0.282721	0	GO:1900735 positive regulation of flocculation	0.0514829	0
[truncated: 4,552 more rows]

## Sheet: Deleterious-Hypergeometric
Query Cluster	Comparison Cluster	pvalue Under-Rep	pvalue Exact	pvalue Over-Rep	Bonferroni pvalue Under-Rep	Bonferroni pvalue Exact	Bonferroni pvalue Over-Rep	Overlap	Cluster 1 size	Cluster2 size	Total Genes Assessed
[truncated: 4,149 more rows]

[truncated: 2 more sheets: Beneficial-WilcoxonFishers, Beneficial-Hypergeometric]
