# Supplementary material for: Natural variation in the consequences of gene overexpression and its implications for evolutionary trajectories
Source: eLife. 2021 Aug 2;10:e70564. doi: 10.7554/eLife.70564 (PMC8352584; doi:10.7554/eLife.70564)
Supplement: Supplementary file 7. — Functional enrichment of differentially expressed (d.e.) genes in each strain using Hypergeometric tests. Overlap between the query cluster and comparison cluster of GO and compiled categories is indicated with various p-values from Hypergeometric tests. [file elife-70564-supp7.xlsx]

## Sheet: All Categories
Query Cluster	Comparison Cluster	pvalue Under-Rep	pvalue Exact	pvalue Over-Rep	Bonferroni pvalue Under-Rep	Bonferroni pvalue Exact	Bonferroni pvalue Over-Rep	Overlap	Cluster 1 size	Cluster2 size	Total Genes Assessed
Cluster_BC187_Repressed_logFC_Genes	Cluster_SGDessentials_APGcategory	2.88685e-23	2.50156e-23	1	3.39205e-20	2.93933e-20	1175	14	437	871	4802
Cluster_YPS163_Repressed_logFC_Genes	Cluster_Pu_Protein_complex	6.85015e-23	5.566e-23	1	8.04893e-20	6.54005e-20	1175	24	470	980	4802
Cluster_YPS163_Repressed_logFC_Genes	Cluster_SGDessentials_APGcategory	7.52234e-22	6.24688e-22	1	8.83875e-19	7.34008e-19	1175	19	470	871	4802
Cluster_YPS128_Repressed_logFC_Genes	Cluster_SGDessentials_APGcategory	5.64242e-20	4.92373e-20	1	6.62984e-17	5.78538e-17	1175	11	364	871	4802
Cluster_YPS128_Repressed_logFC_Genes	Cluster_Pu_Protein_complex	3.47578e-18	2.83361e-18	1	4.08404e-15	3.32949e-15	1175	18	364	980	4802
Cluster_YJM1273_Repressed_logFC_Genes	Cluster_SGDessentials_APGcategory	1.08596e-17	8.38587e-18	1	1.276e-14	9.8534e-15	1175	25	470	871	4802
Cluster_BY4743_Repressed_logFC_Genes	Cluster_iESR_APGcategory	3.43048e-17	2.92894e-17	1	4.03081e-14	3.4415e-14	1175	12	1210	238	4802
Cluster_YPS606_Repressed_logFC_Genes	Cluster_Pu_Protein_complex	3.67839e-17	2.76221e-17	1	4.32211e-14	3.2456e-14	1175	29	440	980	4802
Cluster_YPS606_Repressed_logFC_Genes	Cluster_SGDessentials_APGcategory	7.8078e-17	6.05347e-17	1	9.17417e-14	7.11283e-14	1175	23	440	871	4802
Cluster_YJM1273_Repressed_logFC_Genes	Cluster_rESR_APGcategory	1.82306e-16	1.62235e-16	1	2.1421e-13	1.90626e-13	1175	7	470	520	4802
Cluster_YPS163_Repressed_logFC_Genes	Cluster_rESR_APGcategory	1.82306e-16	1.62235e-16	1	2.1421e-13	1.90626e-13	1175	7	470	520	4802
Cluster_Y7568_Repressed_logFC_Genes	Cluster_SGDessentials_APGcategory	5.75534e-16	4.58745e-16	1	6.76252e-13	5.39025e-13	1175	18	382	871	4802
Cluster_Y2209_Repressed_logFC_Genes	Cluster_SGDessentials_APGcategory	1.01884e-15	8.30981e-16	1	1.19714e-12	9.76403e-13	1175	15	350	871	4802
Cluster_YJM978_Repressed_logFC_Genes	Cluster_SGDessentials_APGcategory	1.14095e-15	8.44606e-16	1	1.34062e-12	9.92412e-13	1175	28	467	871	4802
Cluster_Y2209_Repressed_logFC_Genes	Cluster_Pu_Protein_complex	1.16894e-15	9.16042e-16	1	1.3735e-12	1.07635e-12	1175	20	350	980	4802
Cluster_YPS606_Repressed_logFC_Genes	Cluster_rESR_APGcategory	5.0001e-15	4.40783e-15	1	5.87512e-12	5.1792e-12	1175	7	440	520	4802
Cluster_BC187_Repressed_logFC_Genes	Cluster_rESR_APGcategory	5.06843e-14	4.37434e-14	1	5.95541e-11	5.13985e-11	1175	8	437	520	4802
Cluster_Y7568_Repressed_logFC_Genes	Cluster_Pu_Protein_complex	2.31192e-13	1.65849e-13	1	2.71651e-10	1.94873e-10	1175	28	382	980	4802
Cluster_YJM978_Repressed_logFC_Genes	Cluster_rESR_APGcategory	4.90888e-13	4.04011e-13	1	5.76793e-10	4.74713e-10	1175	11	467	520	4802
Cluster_YJM1273_Repressed_logFC_Genes	Cluster_Pu_Protein_complex	5.0303e-13	3.32331e-13	1	5.9106e-10	3.90489e-10	1175	41	470	980	4802
Cluster_BC187_Repressed_logFC_Genes	Cluster_PAC_APGcategory	5.13214e-12	4.55766e-12	1	6.03026e-09	5.35525e-09	1175	5	437	403	4802
Cluster_YPS128_Repressed_logFC_Genes	Cluster_rESR_APGcategory	1.67142e-11	1.42794e-11	1	1.96392e-08	1.67783e-08	1175	7	364	520	4802
Cluster_YJM1273_Repressed_logFC_Genes	Cluster_PAC_APGcategory	1.69784e-11	1.45009e-11	1	1.99496e-08	1.70386e-08	1175	7	470	403	4802
Cluster_YPS163_Repressed_logFC_Genes	Cluster_PAC_APGcategory	1.69784e-11	1.45009e-11	1	1.99496e-08	1.70386e-08	1175	7	470	403	4802
Cluster_Y12_Repressed_logFC_Genes	Cluster_nucleus_GO	2.36258e-11	1.79645e-11	1	2.77603e-08	2.11083e-08	1175	16	450	584	4802
Cluster_YPS606_Repressed_logFC_Genes	Cluster_PAC_APGcategory	1.8966e-10	1.59911e-10	1	2.22851e-07	1.87895e-07	1175	7	440	403	4802
Cluster_YJM978_Repressed_logFC_Genes	Cluster_nucleus_GO	2.23502e-10	1.61825e-10	1	2.62615e-07	1.90144e-07	1175	19	467	584	4802
Cluster_BC187_Repressed_logFC_Genes	Cluster_nucleus_GO	3.4453e-10	2.53541e-10	1	4.04823e-07	2.97911e-07	1175	17	437	584	4802
Cluster_DBVPG1373_Repressed_logFC_Genes	Cluster_SGDessentials_APGcategory	3.73883e-10	2.45192e-10	1	4.39313e-07	2.88101e-07	1175	31	404	871	4802
Cluster_Y7568_Repressed_logFC_Genes	Cluster_rESR_APGcategory	4.46885e-10	3.57526e-10	1	5.2509e-07	4.20093e-07	1175	10	382	520	4802
Cluster_Y12_Repressed_logFC_Genes	Cluster_Pu_Protein_complex	4.88972e-10	2.9441e-10	1	5.74542e-07	3.45932e-07	1175	45	450	980	4802
Cluster_YJM978_Repressed_logFC_Genes	Cluster_PAC_APGcategory	6.74292e-10	5.45846e-10	1	7.92293e-07	6.41369e-07	1175	9	467	403	4802
Cluster_Y389_Repressed_logFC_Genes	Cluster_iESR_APGcategory	8.28533e-10	7.73883e-10	1	9.73526e-07	9.09313e-07	1175	2	503	238	4802
Cluster_BY4743_Repressed_logFC_Genes	Cluster_SGD-nonessentials_APGcategory	2.2374e-09	8.50725e-10	1	2.62895e-06	9.99602e-07	1175	885	1210	3804	4802
Cluster_DBVPG1373_Repressed_logFC_Genes	Cluster_Pu_Protein_complex	2.97439e-09	1.79849e-09	1	3.49491e-06	2.11323e-06	1175	40	404	980	4802
Cluster_YJM1389_Repressed_logFC_Genes	Cluster_SGDessentials_APGcategory	3.84562e-09	1.99643e-09	1	4.5186e-06	2.34581e-06	1175	71	674	871	4802
Cluster_Y7568_Repressed_logFC_Genes	Cluster_PAC_APGcategory	1.73405e-08	1.4172e-08	1	2.03751e-05	1.66521e-05	1175	7	382	403	4802
Cluster_NCYC3290_Repressed_logFC_Genes	Cluster_SGDessentials_APGcategory	2.03565e-08	1.01121e-08	1	2.39189e-05	1.18817e-05	1175	75	685	871	4802
Cluster_YPS128_Repressed_logFC_Genes	Cluster_PAC_APGcategory	6.73593e-08	5.44015e-08	1	7.91472e-05	6.39218e-05	1175	7	364	403	4802
Cluster_Y12_Repressed_logFC_Genes	Cluster_SGDessentials_APGcategory	8.30805e-08	4.66174e-08	1	9.76196e-05	5.47754e-05	1175	43	450	871	4802
Cluster_YPS163_Repressed_logFC_Genes	Cluster_nucleus_GO	1.34212e-07	8.47758e-08	1	0.000157699	9.96116e-05	1175	25	470	584	4802
Cluster_Y2209_Repressed_logFC_Genes	Cluster_rESR_APGcategory	5.03956e-07	3.5821e-07	1	0.000592148	0.000420897	1175	13	350	520	4802
Cluster_BY4743_Repressed_logFC_Genes	Cluster_Spellman_G1_peak	5.17415e-07	3.26061e-07	1	0.000607963	0.000383122	1175	25	1210	213	4802
Cluster_YJM1389_Repressed_logFC_Genes	Cluster_nucleus_GO	8.22669e-07	4.30789e-07	1	0.000966636	0.000506177	1175	46	674	584	4802
Cluster_YJM1592_Repressed_logFC_Genes	Cluster_iESR_APGcategory	8.6925e-07	5.43995e-07	1	0.00102137	0.000639194	1175	24	1050	238	4802
Cluster_YJM1389_Repressed_logFC_Genes	Cluster_protein_transport_GO	1.00773e-06	8.3337e-07	1	0.00118408	0.00097921	1175	5	674	168	4802
Cluster_BY4743_Repressed_logFC_Genes	Cluster_autophagy_GO	1.1466e-06	1.01333e-06	1	0.00134725	0.00119066	1175	3	1210	74	4802
Cluster_NCYC3290_Repressed_logFC_Genes	Cluster_PAC_APGcategory	3.66999e-06	2.09773e-06	0.999998	0.00431224	0.00246483	1175	29	685	403	4802
Cluster_BY4743_Repressed_logFC_Genes	Cluster_nucleotide_binding_GO	4.76189e-06	2.69418e-06	0.999998	0.00559522	0.00316566	1175	32	1210	237	4802
Cluster_BY4743_Repressed_logFC_Genes	Cluster_hydrolase_activity_GO	7.1819e-06	4.38115e-06	0.999997	0.00843873	0.00514785	1175	23	1210	187	4802
Cluster_Y2209_Repressed_logFC_Genes	Cluster_PAC_APGcategory	1.09873e-05	7.80238e-06	0.999997	0.0129101	0.0091678	1175	10	350	403	4802
Cluster_BY4743_Repressed_logFC_Genes	Cluster_regulation_of_transcription,_DNA-dependent"_GO	1.26318e-05	7.96977e-06	0.999995	0.0148424	0.00936448	1174.99	19	1210	162	4802
Cluster_BY4743_Repressed_logFC_Genes	Cluster_endosome_GO	1.4236e-05	1.34171e-05	0.999999	0.0167273	0.0157651	1175	1	1210	48	4802
Cluster_YJM1389_Repressed_logFC_Genes	Cluster_Pu_Protein_complex	1.61853e-05	6.28085e-06	0.99999	0.0190177	0.00738	1174.99	98	674	980	4802
Cluster_YJM978_Repressed_logFC_Genes	Cluster_Spellman_G1_peak	1.61964e-05	1.29126e-05	0.999997	0.0190308	0.0151723	1175	5	467	213	4802
Cluster_YJM1592_Repressed_logFC_Genes	Cluster_ubiquitin-dependent_protein_catabolic_process_GO	2.66374e-05	2.28406e-05	0.999996	0.0312989	0.0268377	1175	3	1050	72	4802
Cluster_Y12_Repressed_logFC_Genes	Cluster_transcription_GO	3.32281e-05	2.813e-05	0.999995	0.039043	0.0330527	1174.99	3	450	174	4802
Cluster_BY4743_Repressed_logFC_Genes	Cluster_ATP_binding_GO	4.09091e-05	2.33637e-05	0.999982	0.0480682	0.0274523	1174.98	25	1210	187	4802
Cluster_YJM978_Repressed_logFC_Genes	Cluster_ribosome_biogenesis_GO	4.5254e-05	3.81733e-05	0.999993	0.0531734	0.0448536	1174.99	3	467	164	4802
Cluster_BY4743_Repressed_logFC_Genes	Cluster_vacuolar_protein_catabolic_process_GO	5.66639e-05	5.0415e-05	0.999994	0.0665801	0.0592376	1174.99	2	1210	51	4802
Cluster_BY4743_Repressed_logFC_Genes	Cluster_DNA_repair_GO	5.80416e-05	4.62031e-05	0.999988	0.0681989	0.0542886	1174.99	5	1210	72	4802
Cluster_NCYC3290_Repressed_logFC_Genes	Cluster_mRNAprocessing_APGcategory	6.41058e-05	5.65079e-05	0.999992	0.0753243	0.0663968	1174.99	2	685	94	4802
Cluster_BC187_Repressed_logFC_Genes	Cluster_cytoplasm_GO	6.79083e-05	3.50351e-05	0.999967	0.0797923	0.0411662	1174.96	31	437	607	4802
Cluster_NCYC3290_Repressed_logFC_Genes	Cluster_nucleus_GO	7.08722e-05	3.10575e-05	0.99996	0.0832748	0.0364926	1174.95	54	685	584	4802
Cluster_YPS606_Repressed_logFC_Genes	Cluster_nucleus_GO	8.84937e-05	4.56414e-05	0.999957	0.10398	0.0536286	1174.95	30	440	584	4802
Cluster_Y12_Repressed_logFC_Genes	Cluster_regulation_of_transcription,_DNA-dependent"_GO	9.16606e-05	7.65746e-05	0.999985	0.107701	0.0899752	1174.98	3	450	162	4802
Cluster_BC187_Repressed_logFC_Genes	Cluster_regulation_of_translation_GO	0.000107358	8.94691e-05	0.999982	0.126146	0.105126	1174.98	3	437	165	4802
Cluster_BC187_Repressed_logFC_Genes	Cluster_DNA_binding_GO	0.000116427	9.69108e-05	0.99998	0.136802	0.11387	1174.98	3	437	164	4802
Cluster_YJM1389_Repressed_logFC_Genes	Cluster_transcription_GO	0.000118153	8.18905e-05	0.999964	0.13883	0.0962213	1174.96	9	674	174	4802
Cluster_Y2209_Repressed_logFC_Genes	Cluster_nucleus_GO	0.000125374	6.96243e-05	0.999944	0.147314	0.0818086	1174.93	22	350	584	4802
Cluster_BY4743_Repressed_logFC_Genes	Cluster_DNA_binding_GO	0.000131202	7.48204e-05	0.999944	0.154162	0.087914	1174.93	22	1210	164	4802
Cluster_YJM978_Repressed_logFC_Genes	Cluster_cytoplasm_GO	0.000132017	6.42025e-05	0.999932	0.15512	0.0754379	1174.92	35	467	607	4802
Cluster_YJM1389_Repressed_logFC_Genes	Cluster_regulation_of_transcription,_DNA-dependent"_GO	0.000133889	9.48039e-05	0.999961	0.15732	0.111395	1174.95	8	674	162	4802
Cluster_BC187_Repressed_logFC_Genes	Cluster_ESR_APGcategory	0.000207427	9.27938e-05	0.999885	0.243727	0.109033	1174.86	44	437	758	4802
Cluster_BY4743_Repressed_logFC_Genes	Cluster_cytoskeleton_GO	0.000214419	0.00019903	0.999985	0.251942	0.23386	1174.98	1	1210	38	4802
Cluster_YJM1389_Repressed_logFC_Genes	Cluster_ubiquitin-dependent_protein_catabolic_process_GO	0.000221496	0.000204407	0.999983	0.260258	0.240178	1174.98	1	674	72	4802
Cluster_BY4743_Repressed_logFC_Genes	Cluster_ubiquitin-dependent_protein_catabolic_process_GO	0.000234361	0.000176319	0.999942	0.275374	0.207175	1174.93	6	1210	72	4802
Cluster_NCYC3290_Repressed_logFC_Genes	Cluster_transcription_GO	0.000257328	0.000170717	0.999913	0.30236	0.200592	1174.9	10	685	174	4802
Cluster_Y7568_Repressed_logFC_Genes	Cluster_nucleus_GO	0.000262801	0.000135541	0.999873	0.308791	0.159261	1174.85	26	382	584	4802
Cluster_BY4743_Repressed_logFC_Genes	Cluster_vacuole_GO	0.000266035	0.00022219	0.999956	0.312591	0.261073	1174.95	3	1210	52	4802
Cluster_BY4743_Repressed_logFC_Genes	Cluster_Spellman_S/G2_peak	0.000361269	0.000237308	0.999876	0.424491	0.278837	1174.85	11	1210	99	4802
Cluster_Y2209_Repressed_logFC_Genes	Cluster_ATP_binding_GO	0.000383723	0.000312801	0.999929	0.450875	0.367541	1174.92	3	350	187	4802
Cluster_BC187_Repressed_logFC_Genes	Cluster_protein_transport_GO	0.000383887	0.000299771	0.999916	0.451067	0.352231	1174.9	4	437	168	4802
Cluster_YJM1592_Repressed_logFC_Genes	Cluster_autophagy_GO	0.000395493	0.000302051	0.999907	0.464704	0.35491	1174.89	5	1050	74	4802
Cluster_Y12_Repressed_logFC_Genes	Cluster_cytoplasm_GO	0.00039569	0.000183778	0.999788	0.464936	0.215939	1174.75	35	450	607	4802
Cluster_Y389_Repressed_logFC_Genes	Cluster_mitochondrion_GO	0.000445831	0.000261516	0.999816	0.523851	0.307281	1174.78	15	503	298	4802
Cluster_BY4743_Repressed_logFC_Genes	Cluster_binding_GO	0.000466949	0.000311018	0.999844	0.548665	0.365446	1174.82	10	1210	92	4802
Cluster_BC187_Repressed_logFC_Genes	Cluster_ribosome_biogenesis_GO	0.000519016	0.000402589	0.999884	0.609844	0.473042	1174.86	4	437	164	4802
Cluster_YJM978_Repressed_logFC_Genes	Cluster_rESR_RPs_APGcategory	0.000525263	0.000449638	0.999924	0.617184	0.528325	1174.91	2	467	117	4802
Cluster_YPS606_Repressed_logFC_Genes	Cluster_RNA_binding_GO	0.000571625	0.000522059	0.99995	0.671659	0.613419	1174.94	1	440	102	4802
Cluster_YJM1273_Repressed_logFC_Genes	Cluster_ribonucleoprotein_complex_GO	0.000586019	0.000535218	0.999949	0.688572	0.628881	1174.94	1	470	95	4802
Cluster_BC187_Repressed_logFC_Genes	Cluster_RNA_binding_GO	0.000609443	0.000556233	0.999947	0.716096	0.653574	1174.94	1	437	102	4802
Cluster_BY4743_Repressed_logFC_Genes	Cluster_response_to_DNA_damage_stimulus_GO	0.000657526	0.000468047	0.999811	0.772593	0.549955	1174.78	7	1210	73	4802
Cluster_YJM1592_Repressed_logFC_Genes	Cluster_nucleus_GO	0.000701199	0.000230031	0.999529	0.823909	0.270286	1174.45	98	1050	584	4802
Cluster_BY4743_Repressed_logFC_Genes	Cluster_nucleoside-triphosphatase_activity_GO	0.000702744	0.000607143	0.999904	0.825724	0.713393	1174.89	2	1210	41	4802
Cluster_YJM978_Repressed_logFC_Genes	Cluster_RPs_APGcategory	0.000707404	0.000570739	0.999863	0.8312	0.670618	1174.84	3	467	132	4802
Cluster_BY4743_Repressed_logFC_Genes	Cluster_Vacuole_APGcategory	0.000767689	0.000602763	0.999835	0.902035	0.708247	1174.81	4	1210	54	4802
Cluster_NCYC3290_Repressed_logFC_Genes	Cluster_regulation_of_transcription,_DNA-dependent"_GO	0.000848756	0.000541548	0.999693	0.997288	0.636319	1174.64	10	685	162	4802
Cluster_YPS128_Repressed_logFC_Genes	Cluster_nucleus_GO	0.000852185	0.000417321	0.999565	1.00132	0.490352	1174.49	26	364	584	4802
Cluster_BC187_Repressed_logFC_Genes	Cluster_transcription_GO	0.000915583	0.000672448	0.999757	1.07581	0.790126	1174.71	5	437	174	4802
Cluster_Y12_Repressed_logFC_Genes	Cluster_mRNAprocessing_APGcategory	0.00095571	0.000868286	0.999913	1.12296	1.02024	1174.9	1	450	94	4802
Cluster_Y7568_Repressed_logFC_Genes	Cluster_nucleotide_binding_GO	0.0009681	0.000661802	0.999694	1.13752	0.777617	1174.64	7	382	237	4802
Cluster_Y2209_Repressed_logFC_Genes	Cluster_nucleotide_binding_GO	0.00103498	0.000729169	0.999694	1.2161	0.856774	1174.64	6	350	237	4802
Cluster_YJM1389_Repressed_logFC_Genes	Cluster_cytoplasm_GO	0.00109249	0.00040405	0.999312	1.28368	0.474759	1174.19	61	674	607	4802
Cluster_Y7568_Repressed_logFC_Genes	Cluster_transport_GO	0.00124587	0.00079679	0.999551	1.4639	0.936228	1174.47	9	382	269	4802
Cluster_Y389_Repressed_logFC_Genes	Cluster_Pu_Protein_complex	0.00125947	0.000431316	0.999172	1.47988	0.506796	1174.03	77	503	980	4802
Cluster_YJM978_Repressed_logFC_Genes	Cluster_transcription_GO	0.00127317	0.000892932	0.99962	1.49597	1.0492	1174.55	6	467	174	4802
Cluster_Y12_Repressed_logFC_Genes	Cluster_DNA_binding_GO	0.00130394	0.000947951	0.999644	1.53213	1.11384	1174.58	5	450	164	4802
Cluster_Y7568_Repressed_logFC_Genes	Cluster_cytoplasm_GO	0.00134304	0.00061534	0.999272	1.57807	0.723024	1174.14	30	382	607	4802
Cluster_BC187_Repressed_logFC_Genes	Cluster_RPs_APGcategory	0.00145363	0.00115322	0.9997	1.70802	1.35503	1174.65	3	437	132	4802
Cluster_YJM978_Repressed_logFC_Genes	Cluster_ESR_APGcategory	0.00166752	0.000634577	0.998967	1.95934	0.745628	1173.79	52	467	758	4802
Cluster_Y12_Repressed_logFC_Genes	Cluster_nucleotide_binding_GO	0.00180193	0.00110743	0.999305	2.11727	1.30123	1174.18	10	450	237	4802
Cluster_YPS163_Repressed_logFC_Genes	Cluster_RNA_binding_GO	0.00184161	0.0015418	0.9997	2.16389	1.81161	1174.65	2	470	102	4802
Cluster_BY4743_Repressed_logFC_Genes	Cluster_cell_cycle_GO	0.00188327	0.00114022	0.999257	2.21284	1.33976	1174.13	12	1210	95	4802
Cluster_YJM978_Repressed_logFC_Genes	Cluster_RNA_binding_GO	0.0019525	0.00163258	0.99968	2.29419	1.91828	1174.62	2	467	102	4802
Cluster_YJM978_Repressed_logFC_Genes	Cluster_protein_transport_GO	0.00195784	0.00135274	0.999395	2.30046	1.58947	1174.29	6	467	168	4802
Cluster_Y7568_Repressed_logFC_Genes	Cluster_ATP_binding_GO	0.00196745	0.00140941	0.999442	2.31175	1.65606	1174.34	5	382	187	4802
Cluster_YJM1592_Repressed_logFC_Genes	Cluster_molecular_function_GO	0.00196747	0.000821263	0.998854	2.31178	0.964984	1173.65	40	1050	269	4802
Cluster_Y2209_Repressed_logFC_Genes	Cluster_intracellular_GO	0.00196819	0.00164251	0.999674	2.31262	1.92995	1174.62	2	350	137	4802
Cluster_BC187_Repressed_logFC_Genes	Cluster_regulation_of_transcription,_DNA-dependent"_GO	0.00211841	0.00151547	0.999397	2.48913	1.78068	1174.29	5	437	162	4802
Cluster_YJM1273_Repressed_logFC_Genes	Cluster_regulation_of_translation_GO	0.00224282	0.00154198	0.999299	2.63531	1.81183	1174.18	6	470	165	4802
Cluster_BY4743_Repressed_logFC_Genes	Cluster_transcription_GO	0.00226597	0.00106448	0.998799	2.66251	1.25076	1173.59	28	1210	174	4802
Cluster_YJM1592_Repressed_logFC_Genes	Cluster_rRNAprocessing_APGcategory	0.00233124	0.0021113	0.99978	2.73921	2.48078	1174.74	1	1050	34	4802
Cluster_YPS163_Repressed_logFC_Genes	Cluster_ribosome_biogenesis_GO	0.002408	0.00165109	0.999243	2.8294	1.94003	1174.11	6	470	164	4802
Cluster_Y7568_Repressed_logFC_Genes	Cluster_ribosome_biogenesis_GO	0.0024294	0.0018053	0.999376	2.85454	2.12123	1174.27	4	382	164	4802
Cluster_YJM1389_Repressed_logFC_Genes	Cluster_RNA_binding_GO	0.00250987	0.00179723	0.999287	2.9491	2.11175	1174.16	5	674	102	4802
Cluster_YJM978_Repressed_logFC_Genes	Cluster_nucleotide_binding_GO	0.00251227	0.0014843	0.998972	2.95192	1.74405	1173.79	11	467	237	4802
Cluster_Y2209_Repressed_logFC_Genes	Cluster_mitochondrion_GO	0.00254551	0.00153754	0.998992	2.99097	1.80661	1173.82	10	350	298	4802
Cluster_YJM978_Repressed_logFC_Genes	Cluster_DNA_binding_GO	0.0025976	0.00177574	0.999178	3.05218	2.08649	1174.03	6	467	164	4802
Cluster_YJM1273_Repressed_logFC_Genes	Cluster_ribosome_GO	0.00260377	0.00216377	0.99956	3.05943	2.54243	1174.48	2	470	98	4802
Cluster_YJM1389_Repressed_logFC_Genes	Cluster_MitochondrialRPs_APGcategory	0.00268448	0.00241418	0.99973	3.15426	2.83666	1174.68	1	674	54	4802
Cluster_Y2209_Repressed_logFC_Genes	Cluster_RPs_APGcategory	0.00270987	0.00224559	0.999536	3.1841	2.63857	1174.45	2	350	132	4802
Cluster_Y2209_Repressed_logFC_Genes	Cluster_translation_GO	0.00275538	0.00214575	0.99939	3.23757	2.52126	1174.28	3	350	155	4802
Cluster_YPS128_Repressed_logFC_Genes	Cluster_RNA_binding_GO	0.00281681	0.00252219	0.999705	3.30975	2.96357	1174.65	1	364	102	4802
Cluster_YJM978_Repressed_logFC_Genes	Cluster_regulation_of_transcription,_DNA-dependent"_GO	0.0029882	0.00203146	0.999043	3.51113	2.38697	1173.88	6	467	162	4802
Cluster_BY4743_Repressed_logFC_Genes	Cluster_endosome_membrane_GO	0.00301553	0.00272843	0.999713	3.54325	3.20591	1174.66	1	1210	28	4802
Cluster_Y12_Repressed_logFC_Genes	Cluster_protein_transport_GO	0.00303914	0.00206374	0.999025	3.57099	2.42489	1173.85	6	450	168	4802
Cluster_YJM1273_Repressed_logFC_Genes	Cluster_structural_constituent_of_ribosome_GO	0.00319405	0.00285795	0.999664	3.75301	3.35809	1174.61	1	470	77	4802
Cluster_YPS163_Repressed_logFC_Genes	Cluster_structural_constituent_of_ribosome_GO	0.00319405	0.00285795	0.999664	3.75301	3.35809	1174.61	1	470	77	4802
Cluster_BC187_Repressed_logFC_Genes	Cluster_nucleic_acid_binding_GO	0.00320444	0.00286601	0.999662	3.76522	3.36756	1174.6	1	437	83	4802
Cluster_YPS163_Repressed_logFC_Genes	Cluster_cell_cycle_GO	0.00336918	0.00278316	0.999414	3.95879	3.27021	1174.31	2	470	95	4802
Cluster_BY4743_Repressed_logFC_Genes	Cluster_cellular_bud_neck_GO	0.00338552	0.00268277	0.999297	3.97799	3.15225	1174.17	3	1210	41	4802
Cluster_NCYC3290_Repressed_logFC_Genes	Cluster_protein_binding_GO	0.00340484	0.00282417	0.999419	4.00069	3.3184	1174.32	2	685	64	4802
Cluster_BY4743_Repressed_logFC_Genes	Cluster_transcription_factor_activity_GO	0.00350084	0.00263869	0.999138	4.11349	3.10046	1173.99	4	1210	47	4802
Cluster_YJM978_Repressed_logFC_Genes	Cluster_cell_cycle_GO	0.00355471	0.00293246	0.999378	4.17678	3.44564	1174.27	2	467	95	4802
Cluster_YJM978_Repressed_logFC_Genes	Cluster_rRNA_metabolic_process_GO	0.00367248	0.00327892	0.999606	4.31516	3.85273	1174.54	1	467	76	4802
Cluster_BY4743_Repressed_logFC_Genes	Cluster_Proteasome_APGcategory	0.00390753	0.00352298	0.999615	4.59135	4.1395	1174.55	1	1210	27	4802
Cluster_BY4743_Repressed_logFC_Genes	Cluster_fungal-type_vacuole_membrane_GO	0.00390753	0.00352298	0.999615	4.59135	4.1395	1174.55	1	1210	27	4802
Cluster_YJM978_Repressed_logFC_Genes	Cluster_ATP_binding_GO	0.00402598	0.00252339	0.998497	4.73053	2.96498	1173.23	8	467	187	4802
Cluster_BY4743_Repressed_logFC_Genes	Cluster_vacuolar_membrane_GO	0.00432097	0.00323424	0.998913	5.07714	3.80023	1173.72	4	1210	46	4802
Cluster_YPS163_Repressed_logFC_Genes	Cluster_endoplasmic_reticulum_membrane_GO	0.00435156	0.00357188	0.99922	5.11308	4.19696	1174.08	2	470	92	4802
Cluster_YJM978_Repressed_logFC_Genes	Cluster_autophagy_GO	0.00441361	0.00392905	0.999515	5.18599	4.61663	1174.43	1	467	74	4802
Cluster_BC187_Repressed_logFC_Genes	Cluster_rESR_RPs_APGcategory	0.00448878	0.00344936	0.998961	5.27432	4.053	1173.78	3	437	117	4802
Cluster_YJM1592_Repressed_logFC_Genes	Cluster_unfolded_protein_binding_GO	0.00451099	0.00374886	0.999238	5.30041	4.40491	1174.1	2	1050	39	4802
Cluster_YJM1273_Repressed_logFC_Genes	Cluster_translation_GO	0.00451925	0.00301908	0.9985	5.31012	3.54742	1173.24	6	470	155	4802
Cluster_BC187_Repressed_logFC_Genes	Cluster_Spellman_G1_peak	0.00459717	0.00277518	0.998178	5.40167	3.26084	1172.86	9	437	213	4802
Cluster_NCYC3290_Repressed_logFC_Genes	Cluster_mRNA_processing_GO	0.00471024	0.00420097	0.999491	5.53453	4.93614	1174.4	1	685	49	4802
Cluster_BY4743_Repressed_logFC_Genes	Cluster_protein_transport_GO	0.00477229	0.00213994	0.997368	5.60744	2.51443	1171.91	28	1210	168	4802
Cluster_YPS606_Repressed_logFC_Genes	Cluster_structural_constituent_of_ribosome_GO	0.00511587	0.00454136	0.999425	6.01115	5.3361	1174.32	1	440	77	4802
Cluster_YJM1273_Repressed_logFC_Genes	Cluster_nucleus_GO	0.00514476	0.00196724	0.996822	6.04509	2.31151	1171.27	40	470	584	4802
Cluster_YJM1389_Repressed_logFC_Genes	Cluster_DNA_binding_GO	0.0051465	0.00288075	0.997734	6.04714	3.38488	1172.34	12	674	164	4802
Cluster_BY4743_Repressed_logFC_Genes	Cluster_response_to_drug_GO	0.00515033	0.0036662	0.998516	6.05164	4.30778	1173.26	5	1210	51	4802
Cluster_Y7568_Repressed_logFC_Genes	Cluster_RPs_APGcategory	0.00518992	0.00396421	0.998774	6.09816	4.65795	1173.56	3	382	132	4802
Cluster_YJM1273_Repressed_logFC_Genes	Cluster_cytoplasm_GO	0.00525375	0.00197388	0.99672	6.17316	2.31931	1171.15	42	470	607	4802
Cluster_BY4743_Repressed_logFC_Genes	Cluster_DNA_replication_GO	0.00527546	0.00412662	0.998851	6.19867	4.84878	1173.65	3	1210	39	4802
Cluster_YJM978_Repressed_logFC_Genes	Cluster_Golgi_apparatus_GO	0.00530076	0.0047042	0.999403	6.22839	5.52743	1174.3	1	467	72	4802
Cluster_YJM978_Repressed_logFC_Genes	Cluster_ubiquitin-dependent_protein_catabolic_process_GO	0.00530076	0.0047042	0.999403	6.22839	5.52743	1174.3	1	467	72	4802
Cluster_NCYC3290_Repressed_logFC_Genes	Cluster_vesicle-mediated_transport_GO	0.00540184	0.00480684	0.999405	6.34716	5.64804	1174.3	1	685	48	4802
Cluster_YJM1389_Repressed_logFC_Genes	Cluster_response_to_DNA_damage_stimulus_GO	0.00541439	0.00416042	0.998746	6.36191	4.88849	1173.53	3	674	73	4802
Cluster_BY4743_Repressed_logFC_Genes	Cluster_nucleus_GO	0.00546978	0.00144691	0.995977	6.42699	1.70012	1170.27	122	1210	584	4802
Cluster_YPS163_Repressed_logFC_Genes	Cluster_intracellular_GO	0.00559858	0.00385992	0.998261	6.57833	4.53541	1172.96	5	470	137	4802
Cluster_BY4743_Repressed_logFC_Genes	Cluster_nucleic_acid_binding_GO	0.00568628	0.00333741	0.997651	6.68138	3.92146	1172.24	11	1210	83	4802
Cluster_YPS606_Repressed_logFC_Genes	Cluster_cell_cycle_GO	0.00572962	0.00466571	0.998936	6.7323	5.48221	1173.75	2	440	95	4802
Cluster_Y389_Repressed_logFC_Genes	Cluster_protein_transport_GO	0.00581561	0.0035818	0.997766	6.83334	4.20861	1172.38	8	503	168	4802
Cluster_Y7568_Repressed_logFC_Genes	Cluster_protein_transport_GO	0.00601463	0.00412404	0.998109	7.06719	4.84575	1172.78	5	382	168	4802
Cluster_BC187_Repressed_logFC_Genes	Cluster_cell_cycle_GO	0.00603824	0.00490946	0.998871	7.09493	5.76862	1173.67	2	437	95	4802
Cluster_Y2209_Repressed_logFC_Genes	Cluster_ribonucleoprotein_complex_GO	0.00604563	0.00534507	0.999299	7.10362	6.28046	1174.18	1	350	95	4802
Cluster_YJM1389_Repressed_logFC_Genes	Cluster_Golgi_apparatus_GO	0.00607389	0.00464894	0.998575	7.13682	5.4625	1173.33	3	674	72	4802
Cluster_YJM1389_Repressed_logFC_Genes	Cluster_transport_GO	0.00610972	0.00273928	0.99663	7.17892	3.21865	1171.04	24	674	269	4802
Cluster_Y12_Repressed_logFC_Genes	Cluster_response_to_DNA_damage_stimulus_GO	0.00622176	0.00550457	0.999283	7.31057	6.46787	1174.16	1	450	73	4802
Cluster_Y12_Repressed_logFC_Genes	Cluster_ATP_binding_GO	0.00624776	0.00382673	0.997579	7.34112	4.49641	1172.16	8	450	187	4802
Cluster_BY4743_Repressed_logFC_Genes	Cluster_protein_amino_acid_phosphorylation_GO	0.00627372	0.00443016	0.998156	7.37162	5.20544	1172.83	5	1210	50	4802
Cluster_BY4743_Repressed_logFC_Genes	Cluster_sequence-specific_DNA_binding_GO	0.00627372	0.00443016	0.998156	7.37162	5.20544	1172.83	5	1210	50	4802
Cluster_YJM1389_Repressed_logFC_Genes	Cluster_cell_wall_organization_GO	0.00640625	0.00522691	0.998821	7.52734	6.14162	1173.61	2	674	60	4802
Cluster_BY4743_Repressed_logFC_Genes	Cluster_Spellman_S_peak	0.00645413	0.0042212	0.997767	7.5836	4.95991	1172.38	7	1210	61	4802
Cluster_DBVPG1373_Repressed_logFC_Genes	Cluster_RNA_binding_GO	0.00648218	0.00525635	0.998774	7.61656	6.17621	1173.56	2	404	102	4802
Cluster_YPS128_Repressed_logFC_Genes	Cluster_membrane_GO	0.00649302	0.0030971	0.996604	7.6293	3.63909	1171.01	19	364	418	4802
Cluster_BY4743_Repressed_logFC_Genes	Cluster_protein_folding_GO	0.00654762	0.00482802	0.99828	7.69345	5.67292	1172.98	4	1210	44	4802
Cluster_Y12_Repressed_logFC_Genes	Cluster_ubiquitin-dependent_protein_catabolic_process_GO	0.00679118	0.00599859	0.999207	7.97964	7.04834	1174.07	1	450	72	4802
Cluster_YJM1389_Repressed_logFC_Genes	Cluster_response_to_stress_GO	0.00690834	0.00611975	0.999211	8.1173	7.19071	1174.07	1	674	47	4802
Cluster_YPS128_Repressed_logFC_Genes	Cluster_endoplasmic_reticulum_GO	0.00730498	0.00550952	0.998205	8.58335	6.47369	1172.89	3	364	133	4802
Cluster_YJM1389_Repressed_logFC_Genes	Cluster_hydrolase_activity_GO	0.00738677	0.00378706	0.9964	8.67945	4.4498	1170.77	15	674	187	4802
Cluster_YJM1273_Repressed_logFC_Genes	Cluster_RNA_binding_GO	0.00752365	0.00568205	0.998158	8.84029	6.67641	1172.84	3	470	102	4802
Cluster_BY4743_Repressed_logFC_Genes	Cluster_cell_wall_organization_GO	0.00772437	0.00500704	0.997283	9.07613	5.88327	1171.81	7	1210	60	4802
Cluster_BY4743_Repressed_logFC_Genes	Cluster_endocytosis_GO	0.0077782	0.00640114	0.998623	9.13939	7.52134	1173.38	2	1210	31	4802
Cluster_YJM1592_Repressed_logFC_Genes	Cluster_mRNAprocessing_APGcategory	0.00803302	0.00457714	0.996544	9.4388	5.37814	1170.94	11	1050	94	4802
Cluster_Y7568_Repressed_logFC_Genes	Cluster_mitochondrion_GO	0.00824371	0.00433397	0.99609	9.68636	5.09241	1170.41	13	382	298	4802
Cluster_YJM978_Repressed_logFC_Genes	Cluster_cell_division_GO	0.00835301	0.00735017	0.998997	9.81479	8.63645	1173.82	1	467	67	4802
Cluster_BY4743_Repressed_logFC_Genes	Cluster_general_RNA_polymerase_II_transcription_factor_activity_GO	0.00843899	0.00751535	0.999076	9.91581	8.83054	1173.91	1	1210	24	4802
Cluster_BY4743_Repressed_logFC_Genes	Cluster_ascospore_formation_GO	0.00843899	0.00751535	0.999076	9.91581	8.83054	1173.91	1	1210	24	4802
Cluster_BY4743_Repressed_logFC_Genes	Cluster_piecemeal_microautophagy_of_nucleus_GO	0.00843899	0.00751535	0.999076	9.91581	8.83054	1173.91	1	1210	24	4802
Cluster_YPS163_Repressed_logFC_Genes	Cluster_transcription_GO	0.00848911	0.00511314	0.996624	9.9747	6.00794	1171.03	8	470	174	4802
Cluster_YJM978_Repressed_logFC_Genes	Cluster_zinc_ion_binding_GO	0.00886443	0.0057286	0.996864	10.4157	6.73111	1171.32	6	467	146	4802
Cluster_BY4743_Repressed_logFC_Genes	Cluster_protein_serine/threonine_kinase_activity_GO	0.00925635	0.00642475	0.997168	10.8762	7.54908	1171.67	5	1210	48	4802
Cluster_BY4743_Repressed_logFC_Genes	Cluster_protein_kinase_activity_GO	0.00925635	0.00642475	0.997168	10.8762	7.54908	1171.67	5	1210	48	4802
Cluster_Y2209_Repressed_logFC_Genes	Cluster_transport_GO	0.00934392	0.00524913	0.995905	10.9791	6.16773	1170.19	10	350	269	4802
Cluster_DBVPG1373_Repressed_logFC_Genes	Cluster_protein_transport_GO	0.00950103	0.00610531	0.996604	11.1637	7.17374	1171.01	6	404	168	4802
Cluster_Y389_Repressed_logFC_Genes	Cluster_structural_constituent_of_ribosome_GO	0.00957288	0.00768552	0.998113	11.2481	9.03049	1172.78	2	503	77	4802
Cluster_Y7568_Repressed_logFC_Genes	Cluster_RNA_binding_GO	0.0097245	0.00778325	0.998059	11.4263	9.14532	1172.72	2	382	102	4802
Cluster_BY4743_Repressed_logFC_Genes	Cluster_chromatin_modification_GO	0.00984677	0.00714138	0.997295	11.57	8.39112	1171.82	4	1210	42	4802
Cluster_BY4743_Repressed_logFC_Genes	Cluster_cellular_response_to_heat_GO	0.00984677	0.00714138	0.997295	11.57	8.39112	1171.82	4	1210	42	4802
Cluster_Y2209_Repressed_logFC_Genes	Cluster_transcription_GO	0.00987627	0.00660558	0.996729	11.6046	7.76156	1171.16	5	350	174	4802
Cluster_YJM1592_Repressed_logFC_Genes	Cluster_mRNA_processing_GO	0.00987779	0.00711485	0.997237	11.6064	8.35995	1171.75	4	1050	49	4802
Cluster_YPS606_Repressed_logFC_Genes	Cluster_intracellular_GO	0.0104568	0.00698931	0.996532	12.2867	8.21244	1170.93	5	440	137	4802
Cluster_YPS163_Repressed_logFC_Genes	Cluster_protein_binding_GO	0.0105357	0.00922629	0.998691	12.3794	10.8409	1173.46	1	470	64	4802
Cluster_YJM1592_Repressed_logFC_Genes	Cluster_fungal-type_vacuole_membrane_GO	0.0107824	0.00952988	0.998748	12.6693	11.1976	1173.53	1	1050	27	4802
Cluster_BY4743_Repressed_logFC_Genes	Cluster_ubiquitin-protein_ligase_activity_GO	0.0108781	0.00964128	0.998763	12.7818	11.3285	1173.55	1	1210	23	4802
Cluster_YJM978_Repressed_logFC_Genes	Cluster_kinase_activity_GO	0.0109483	0.00957908	0.998631	12.8643	11.2554	1173.39	1	467	64	4802
Cluster_NCYC3290_Repressed_logFC_Genes	Cluster_rRNA_metabolic_process_GO	0.0111677	0.00788539	0.996718	13.122	9.26533	1171.14	4	685	76	4802
Cluster_Y389_Repressed_logFC_Genes	Cluster_RPs_APGcategory	0.0112095	0.00715847	0.995949	13.1712	8.4112	1170.24	6	503	132	4802
Cluster_BY4743_Repressed_logFC_Genes	Cluster_mating_projection_tip_GO	0.0120387	0.00865317	0.996614	14.1455	10.1675	1171.02	4	1210	41	4802
Cluster_YPS606_Repressed_logFC_Genes	Cluster_regulation_of_translation_GO	0.0121831	0.00742704	0.995244	14.3151	8.72677	1169.41	7	440	165	4802
Cluster_YPS163_Repressed_logFC_Genes	Cluster_protein_transport_GO	0.0122502	0.00721145	0.994961	14.394	8.47345	1169.08	8	470	168	4802
Cluster_NCYC3290_Repressed_logFC_Genes	Cluster_cell_cycle_GO	0.0123227	0.00788282	0.99556	14.4792	9.26231	1169.78	6	685	95	4802
Cluster_BY4743_Repressed_logFC_Genes	Cluster_helicase_activity_GO	0.0123436	0.010019	0.997675	14.5037	11.7723	1172.27	2	1210	29	4802
Cluster_BY4743_Repressed_logFC_Genes	Cluster_GTP_binding_GO	0.0123436	0.010019	0.997675	14.5037	11.7723	1172.27	2	1210	29	4802
Cluster_NCYC3290_Repressed_logFC_Genes	Cluster_nucleotide_binding_GO	0.0124099	0.00541747	0.993008	14.5816	6.36553	1166.78	22	685	237	4802
Cluster_BC187_Repressed_logFC_Genes	Cluster_cell_division_GO	0.0124776	0.0108801	0.998402	14.6612	12.7841	1173.12	1	437	67	4802
Cluster_Y7568_Repressed_logFC_Genes	Cluster_translation_GO	0.0124863	0.00825187	0.995766	14.6714	9.69595	1170.03	5	382	155	4802
Cluster_YPS128_Repressed_logFC_Genes	Cluster_molecular_function_GO	0.0125453	0.00671998	0.994175	14.7407	7.89598	1168.16	11	364	269	4802
Cluster_YPS606_Repressed_logFC_Genes	Cluster_ribosome_biogenesis_GO	0.0129155	0.00784429	0.994929	15.1757	9.21704	1169.04	7	440	164	4802
Cluster_Y7568_Repressed_logFC_Genes	Cluster_ESR_APGcategory	0.0130775	0.00445106	0.991374	15.3661	5.23	1164.86	45	382	758	4802
Cluster_DBVPG1373_Repressed_logFC_Genes	Cluster_ubiquitin-dependent_protein_catabolic_process_GO	0.0131304	0.0114301	0.9983	15.4282	13.4304	1173	1	404	72	4802
Cluster_DBVPG1373_Repressed_logFC_Genes	Cluster_endoplasmic_reticulum_membrane_GO	0.0131689	0.0104335	0.997265	15.4735	12.2594	1171.79	2	404	92	4802
Cluster_Y7568_Repressed_logFC_Genes	Cluster_rESR_RPs_APGcategory	0.0132812	0.00977467	0.996493	15.6054	11.4852	1170.88	3	382	117	4802
Cluster_YJM1592_Repressed_logFC_Genes	Cluster_peroisome_GO	0.0133653	0.0117598	0.998395	15.7042	13.8178	1173.11	1	1050	26	4802
Cluster_Y2209_Repressed_logFC_Genes	Cluster_protein_transport_GO	0.0133799	0.00880069	0.995421	15.7214	10.3408	1169.62	5	350	168	4802
Cluster_YJM1389_Repressed_logFC_Genes	Cluster_chromatin_modification_GO	0.0134158	0.0117232	0.998307	15.7636	13.7748	1173.01	1	674	42	4802
Cluster_YPS606_Repressed_logFC_Genes	Cluster_endoplasmic_reticulum_GO	0.0134937	0.00889332	0.9954	15.8551	10.4497	1169.6	5	440	133	4802
Cluster_Y12_Repressed_logFC_Genes	Cluster_kinase_activity_GO	0.0135947	0.0118325	0.998238	15.9738	13.9032	1172.93	1	450	64	4802
Cluster_YPS163_Repressed_logFC_Genes	Cluster_mRNAprocessing_APGcategory	0.0139078	0.0102379	0.99633	16.3417	12.0295	1170.69	3	470	94	4802
Cluster_BY4743_Repressed_logFC_Genes	Cluster_GTPase_activity_GO	0.0140003	0.0123443	0.998344	16.4504	14.5046	1173.05	1	1210	22	4802
Cluster_BY4743_Repressed_logFC_Genes	Cluster_cell_division_GO	0.0140917	0.00826636	0.994175	16.5577	9.71297	1168.16	9	1210	67	4802
Cluster_YJM1389_Repressed_logFC_Genes	Cluster_ATP_binding_GO	0.0141668	0.00678001	0.992613	16.646	7.96651	1166.32	16	674	187	4802
Cluster_BY4743_Repressed_logFC_Genes	Cluster_Golgi_apparatus_GO	0.0143448	0.00816254	0.993818	16.8551	9.59098	1167.74	10	1210	72	4802
Cluster_BY4743_Repressed_logFC_Genes	Cluster_TATAcontaining_APGcategory	0.0146289	0.00294813	0.988319	17.189	3.46405	1161.27	198	1210	888	4802
Cluster_Y389_Repressed_logFC_Genes	Cluster_ubiquitin-dependent_protein_catabolic_process_GO	0.0148689	0.011754	0.996885	17.471	13.811	1171.34	2	503	72	4802
Cluster_YJM1592_Repressed_logFC_Genes	Cluster_cell_cycle_GO	0.0150197	0.00799678	0.992977	17.6481	9.39622	1166.75	12	1050	95	4802
Cluster_YPS606_Repressed_logFC_Genes	Cluster_protein_binding_GO	0.0154265	0.0133834	0.997957	18.1261	15.7255	1172.6	1	440	64	4802
Cluster_Y7568_Repressed_logFC_Genes	Cluster_ribonucleoprotein_complex_GO	0.0154567	0.0121664	0.99671	18.1616	14.2955	1171.13	2	382	95	4802
Cluster_BY4743_Repressed_logFC_Genes	Cluster_meiosis_GO	0.0154757	0.0116364	0.996161	18.1839	13.6728	1170.49	3	1210	34	4802
Cluster_Y2209_Repressed_logFC_Genes	Cluster_regulation_of_translation_GO	0.0155399	0.0101313	0.994591	18.2594	11.9043	1168.64	5	350	165	4802
Cluster_YJM978_Repressed_logFC_Genes	Cluster_regulation_of_translation_GO	0.0156283	0.00904676	0.993418	18.3633	10.6299	1167.27	8	467	165	4802
Cluster_BC187_Repressed_logFC_Genes	Cluster_protein_binding_GO	0.0160206	0.0138848	0.997864	18.8242	16.3146	1172.49	1	437	64	4802
Cluster_YPS128_Repressed_logFC_Genes	Cluster_structural_constituent_of_ribosome_GO	0.016319	0.0141213	0.997802	19.1748	16.5925	1172.42	1	364	77	4802
Cluster_Y2209_Repressed_logFC_Genes	Cluster_ribosome_biogenesis_GO	0.0163294	0.0106138	0.994284	19.187	12.4712	1168.28	5	350	164	4802
Cluster_NCYC3290_Repressed_logFC_Genes	Cluster_endoplasmic_reticulum_membrane_GO	0.0164159	0.0103183	0.993902	19.2887	12.124	1167.83	6	685	92	4802
Cluster_YPS163_Repressed_logFC_Genes	Cluster_rRNA_metabolic_process_GO	0.0164398	0.012935	0.996495	19.3168	15.1986	1170.88	2	470	76	4802
Cluster_YPS606_Repressed_logFC_Genes	Cluster_ribosome_GO	0.0166905	0.0121698	0.995479	19.6113	14.2995	1169.69	3	440	98	4802
Cluster_YPS606_Repressed_logFC_Genes	Cluster_transcription_GO	0.0167897	0.00965982	0.99287	19.7279	11.3503	1166.62	8	440	174	4802
Cluster_YJM978_Repressed_logFC_Genes	Cluster_endoplasmic_reticulum_membrane_GO	0.0169202	0.0123385	0.995418	19.8812	14.4977	1169.62	3	467	92	4802
Cluster_NCYC3290_Repressed_logFC_Genes	Cluster_Golgi_apparatus_GO	0.0170472	0.0117782	0.994731	20.0305	13.8394	1168.81	4	685	72	4802
Cluster_NCYC3290_Repressed_logFC_Genes	Cluster_ribosome_biogenesis_GO	0.0170879	0.008403	0.991315	20.0783	9.87353	1164.8	14	685	164	4802
Cluster_Y12_Repressed_logFC_Genes	Cluster_iESR_APGcategory	0.0172291	0.00857622	0.991347	20.2442	10.0771	1164.83	13	450	238	4802
Cluster_YPS128_Repressed_logFC_Genes	Cluster_ribosome_GO	0.0172976	0.0135493	0.996252	20.3247	15.9204	1170.6	2	364	98	4802
Cluster_Y2209_Repressed_logFC_Genes	Cluster_RNA_binding_GO	0.0173023	0.0135489	0.996247	20.3302	15.92	1170.59	2	350	102	4802
Cluster_YPS163_Repressed_logFC_Genes	Cluster_regulation_of_transcription,_DNA-dependent"_GO	0.0175111	0.0100544	0.992543	20.5755	11.8139	1166.24	8	470	162	4802
Cluster_YJM1592_Repressed_logFC_Genes	Cluster_DNA_replication_GO	0.0175506	0.0130396	0.995489	20.622	15.3215	1169.7	3	1050	39	4802
Cluster_YJM1389_Repressed_logFC_Genes	Cluster_nucleic_acid_binding_GO	0.0175831	0.0115087	0.993926	20.6601	13.5227	1167.86	5	674	83	4802
Cluster_BY4743_Repressed_logFC_Genes	Cluster_chromosome_segregation_GO	0.0179885	0.0157715	0.997783	21.1365	18.5315	1172.4	1	1210	21	4802
Cluster_Y2209_Repressed_logFC_Genes	Cluster_regulation_of_transcription,_DNA-dependent"_GO	0.0180218	0.0116416	0.99362	21.1756	13.6789	1167.5	5	350	162	4802
Cluster_YPS606_Repressed_logFC_Genes	Cluster_molecular_function_GO	0.0184772	0.00873685	0.99026	21.7107	10.2658	1163.56	15	440	269	4802
Cluster_YPS128_Repressed_logFC_Genes	Cluster_translation_GO	0.018668	0.0120361	0.993368	21.9349	14.1424	1167.21	5	364	155	4802
Cluster_BY4743_Repressed_logFC_Genes	Cluster_signal_transduction_GO	0.0190709	0.0142047	0.995134	22.4083	16.6905	1169.28	3	1210	33	4802
Cluster_BY4743_Repressed_logFC_Genes	Cluster_Spellman_M-G1_peak	0.0191218	0.00985489	0.990733	22.4681	11.5795	1164.11	13	1210	85	4802
Cluster_YJM1389_Repressed_logFC_Genes	Cluster_DNA_repair_GO	0.0193277	0.0132538	0.993926	22.71	15.5732	1167.86	4	674	72	4802
Cluster_YJM1273_Repressed_logFC_Genes	Cluster_endoplasmic_reticulum_GO	0.0193455	0.0119209	0.992575	22.731	14.0071	1166.28	6	470	133	4802
Cluster_BY4743_Repressed_logFC_Genes	Cluster_peptidase_activity_GO	0.0196579	0.0131103	0.993452	23.098	15.4046	1167.31	5	1210	44	4802
Cluster_Y2209_Repressed_logFC_Genes	Cluster_structural_constituent_of_ribosome_GO	0.0200924	0.0172857	0.997193	23.6086	20.3107	1171.7	1	350	77	4802
Cluster_YJM1592_Repressed_logFC_Genes	Cluster_spliceosome_GO	0.02046	0.0178227	0.997363	24.0405	20.9417	1171.9	1	1050	24	4802
Cluster_YJM1592_Repressed_logFC_Genes	Cluster_nucleolus_GO	0.0205265	0.0135422	0.993016	24.1186	15.9121	1166.79	5	1050	51	4802
Cluster_NCYC3290_Repressed_logFC_Genes	Cluster_ATP_binding_GO	0.0207676	0.00942601	0.988658	24.4019	11.0756	1161.67	17	685	187	4802
Cluster_NCYC3290_Repressed_logFC_Genes	Cluster_RNAPol_APGcategory	0.0207703	0.0179559	0.997186	24.4051	21.0982	1171.69	1	685	38	4802
Cluster_NCYC3290_Repressed_logFC_Genes	Cluster_cytoskeleton_GO	0.0207703	0.0179559	0.997186	24.4051	21.0982	1171.69	1	685	38	4802
Cluster_YJM1389_Repressed_logFC_Genes	Cluster_zinc_ion_binding_GO	0.0212809	0.0107694	0.989489	25.0051	12.654	1162.65	12	674	146	4802
Cluster_YPS606_Repressed_logFC_Genes	Cluster_translation_GO	0.0216014	0.0126561	0.991055	25.3816	14.8709	1164.49	7	440	155	4802
Cluster_Y2209_Repressed_logFC_Genes	Cluster_cytoplasm_GO	0.0216732	0.00785068	0.986178	25.466	9.22455	1158.76	32	350	607	4802
Cluster_BY4743_Repressed_logFC_Genes	Cluster_mitosis_GO	0.0217116	0.0151436	0.993432	25.5111	17.7937	1167.28	4	1210	38	4802
Cluster_Y2209_Repressed_logFC_Genes	Cluster_ribosome_GO	0.0219351	0.0170036	0.995069	25.7737	19.9792	1169.21	2	350	98	4802
Cluster_YPS606_Repressed_logFC_Genes	Cluster_mRNAprocessing_APGcategory	0.022036	0.0158379	0.993802	25.8923	18.6095	1167.72	3	440	94	4802
Cluster_YPS128_Repressed_logFC_Genes	Cluster_mRNAprocessing_APGcategory	0.0221417	0.0171619	0.99502	26.0165	20.1652	1169.15	2	364	94	4802
Cluster_YJM1273_Repressed_logFC_Genes	Cluster_Golgi_apparatus_GO	0.0226737	0.0176009	0.994927	26.6416	20.6811	1169.04	2	470	72	4802
Cluster_YJM1273_Repressed_logFC_Genes	Cluster_ubiquitin-dependent_protein_catabolic_process_GO	0.0226737	0.0176009	0.994927	26.6416	20.6811	1169.04	2	470	72	4802
Cluster_YPS163_Repressed_logFC_Genes	Cluster_Golgi_apparatus_GO	0.0226737	0.0176009	0.994927	26.6416	20.6811	1169.04	2	470	72	4802
Cluster_YJM978_Repressed_logFC_Genes	Cluster_transferase_activity_GO	0.022749	0.0119868	0.989238	26.7301	14.0845	1162.35	10	467	185	4802
Cluster_YJM1592_Repressed_logFC_Genes	Cluster_protein_folding_GO	0.0228671	0.0157822	0.992915	26.8688	18.5441	1166.68	4	1050	44	4802
Cluster_YPS128_Repressed_logFC_Genes	Cluster_ubiquitin-dependent_protein_catabolic_process_GO	0.0229676	0.0196871	0.99672	26.9869	23.1323	1171.15	1	364	72	4802
Cluster_BY4743_Repressed_logFC_Genes	Cluster_incipient_cellular_bud_site_GO	0.023071	0.0201029	0.997032	27.1084	23.6209	1171.51	1	1210	20	4802
Cluster_Y389_Repressed_logFC_Genes	Cluster_ribonucleoprotein_complex_GO	0.023265	0.0156745	0.99241	27.3364	18.4175	1166.08	4	503	95	4802
Cluster_YJM1389_Repressed_logFC_Genes	Cluster_mRNA_processing_GO	0.0238916	0.0186089	0.994717	28.0726	21.8655	1168.79	2	674	49	4802
Cluster_DBVPG1373_Repressed_logFC_Genes	Cluster_protein_binding_GO	0.0241713	0.0207007	0.996529	28.4013	24.3233	1170.92	1	404	64	4802
Cluster_Y2209_Repressed_logFC_Genes	Cluster_rESR_RPs_APGcategory	0.0242327	0.0172814	0.993049	28.4734	20.3056	1166.83	3	350	117	4802
Cluster_BY4743_Repressed_logFC_Genes	Cluster_peroisome_GO	0.0242969	0.0192395	0.994943	28.5489	22.6064	1169.06	2	1210	26	4802
Cluster_YPS606_Repressed_logFC_Genes	Cluster_rRNA_metabolic_process_GO	0.0245459	0.018971	0.994425	28.8414	22.2909	1168.45	2	440	76	4802
Cluster_Y389_Repressed_logFC_Genes	Cluster_oidoreductase_activity_GO	0.0249492	0.0193003	0.994351	29.3153	22.6779	1168.36	2	503	66	4802
Cluster_YPS128_Repressed_logFC_Genes	Cluster_endoplasmic_reticulum_membrane_GO	0.0250228	0.0192865	0.994264	29.4018	22.6616	1168.26	2	364	92	4802
Cluster_YPS606_Repressed_logFC_Genes	Cluster_endoplasmic_reticulum_membrane_GO	0.0252771	0.0180283	0.992751	29.7006	21.1833	1166.48	3	440	92	4802
Cluster_BC187_Repressed_logFC_Genes	Cluster_rRNA_metabolic_process_GO	0.0255355	0.0196981	0.994163	30.0042	23.1453	1168.14	2	437	76	4802
Cluster_Y2209_Repressed_logFC_Genes	Cluster_response_to_DNA_damage_stimulus_GO	0.0260891	0.0222712	0.996182	30.6547	26.1687	1170.51	1	350	73	4802
Cluster_Y2209_Repressed_logFC_Genes	Cluster_cell_cycle_GO	0.0261592	0.0201136	0.993954	30.7371	23.6335	1167.9	2	350	95	4802
Cluster_YPS163_Repressed_logFC_Genes	Cluster_molecular_function_GO	0.0261787	0.0114996	0.985321	30.76	13.512	1157.75	17	470	269	4802
Cluster_YPS163_Repressed_logFC_Genes	Cluster_translation_GO	0.0262323	0.0145863	0.988354	30.823	17.1389	1161.32	8	470	155	4802
Cluster_BC187_Repressed_logFC_Genes	Cluster_endoplasmic_reticulum_membrane_GO	0.0264109	0.0187874	0.992376	31.0328	22.0752	1166.04	3	437	92	4802
Cluster_YJM1389_Repressed_logFC_Genes	Cluster_nucleotide_binding_GO	0.0265264	0.0105892	0.984063	31.1685	12.4423	1156.27	23	674	237	4802
Cluster_DBVPG1373_Repressed_logFC_Genes	Cluster_endoplasmic_reticulum_GO	0.0267497	0.0168454	0.990096	31.4309	19.7933	1163.36	5	404	133	4802
Cluster_YJM1389_Repressed_logFC_Genes	Cluster_vesicle-mediated_transport_GO	0.02683	0.0207878	0.993958	31.5252	24.4257	1167.9	2	674	48	4802
Cluster_YJM1389_Repressed_logFC_Genes	Cluster_rRNA_processing_GO	0.02683	0.0207878	0.993958	31.5252	24.4257	1167.9	2	674	48	4802
Cluster_YJM1389_Repressed_logFC_Genes	Cluster_protein_serine/threonine_kinase_activity_GO	0.02683	0.0207878	0.993958	31.5252	24.4257	1167.9	2	674	48	4802
Cluster_YJM1389_Repressed_logFC_Genes	Cluster_protein_kinase_activity_GO	0.02683	0.0207878	0.993958	31.5252	24.4257	1167.9	2	674	48	4802
Cluster_YJM1592_Repressed_logFC_Genes	Cluster_response_to_DNA_damage_stimulus_GO	0.0271396	0.0150009	0.987861	31.889	17.6261	1160.74	9	1050	73	4802
Cluster_Y7568_Repressed_logFC_Genes	Cluster_transcription_GO	0.0273235	0.0156812	0.988358	32.1051	18.4254	1161.32	7	382	174	4802
Cluster_Y2209_Repressed_logFC_Genes	Cluster_mRNAprocessing_APGcategory	0.0277308	0.0212617	0.993531	32.5837	24.9825	1167.4	2	350	94	4802
Cluster_Y2209_Repressed_logFC_Genes	Cluster_DNA_repair_GO	0.0278389	0.0237159	0.995877	32.7107	27.8662	1170.16	1	350	72	4802
Cluster_Y2209_Repressed_logFC_Genes	Cluster_Golgi_apparatus_GO	0.0278389	0.0237159	0.995877	32.7107	27.8662	1170.16	1	350	72	4802
Cluster_YJM978_Repressed_logFC_Genes	Cluster_molecular_function_GO	0.0282795	0.0123205	0.984041	33.2284	14.4766	1156.25	17	467	269	4802
Cluster_BY4743_Repressed_logFC_Genes	Cluster_RNA_splicing_GO	0.0287513	0.0209731	0.992222	33.7828	24.6434	1165.86	3	1210	31	4802
Cluster_YJM1389_Repressed_logFC_Genes	Cluster_endoplasmic_reticulum_GO	0.0288801	0.0146032	0.985723	33.9341	17.1588	1158.22	11	674	133	4802
Cluster_YJM1389_Repressed_logFC_Genes	Cluster_transferase_activity_GO	0.0290266	0.0127307	0.983704	34.1063	14.9586	1155.85	17	674	185	4802
Cluster_Y389_Repressed_logFC_Genes	Cluster_mRNA_processing_GO	0.0291852	0.0248919	0.995707	34.2926	29.248	1169.96	1	503	49	4802
Cluster_BY4743_Repressed_logFC_Genes	Cluster_protein_targeting_to_vacuole_GO	0.0295313	0.0255581	0.996027	34.6993	30.0308	1170.33	1	1210	19	4802
Cluster_BC187_Repressed_logFC_Genes	Cluster_autophagy_GO	0.0295627	0.0226436	0.993081	34.7362	26.6062	1166.87	2	437	74	4802
Cluster_YPS163_Repressed_logFC_Genes	Cluster_ribosome_GO	0.0302674	0.0200156	0.989748	35.5642	23.5183	1162.95	4	470	98	4802
Cluster_BY4743_Repressed_logFC_Genes	Cluster_establishment_of_cell_polarity_GO	0.0303079	0.0237706	0.993463	35.6118	27.9305	1167.32	2	1210	25	4802
Cluster_YPS163_Repressed_logFC_Genes	Cluster_regulation_of_translation_GO	0.031122	0.0164579	0.985336	36.5684	19.338	1157.77	9	470	165	4802
Cluster_YJM1592_Repressed_logFC_Genes	Cluster_DNA_recombination_GO	0.0311487	0.0268173	0.995669	36.5997	31.5103	1169.91	1	1050	22	4802
Cluster_YJM1592_Repressed_logFC_Genes	Cluster_protein_complex_GO	0.0311487	0.0268173	0.995669	36.5997	31.5103	1169.91	1	1050	22	4802
Cluster_BC187_Repressed_logFC_Genes	Cluster_response_to_DNA_damage_stimulus_GO	0.0317946	0.0242635	0.992469	37.3587	28.5096	1166.15	2	437	73	4802
Cluster_YPS606_Repressed_logFC_Genes	Cluster_regulation_of_transcription,_DNA-dependent"_GO	0.0319346	0.0174301	0.985496	37.5232	20.4804	1157.96	8	440	162	4802
Cluster_YJM1592_Repressed_logFC_Genes	Cluster_endosome_GO	0.0325112	0.0207902	0.988279	38.2007	24.4285	1161.23	5	1050	48	4802
Cluster_YJM978_Repressed_logFC_Genes	Cluster_nucleic_acid_binding_GO	0.0326274	0.0229343	0.990307	38.3372	26.9478	1163.61	3	467	83	4802
Cluster_YJM1592_Repressed_logFC_Genes	Cluster_Vacuole_APGcategory	0.032696	0.0199342	0.987238	38.4178	23.4227	1160	6	1050	54	4802
Cluster_YJM1273_Repressed_logFC_Genes	Cluster_ribosome_biogenesis_GO	0.0328393	0.0172775	0.984438	38.5862	20.3011	1156.71	9	470	164	4802
Cluster_YPS606_Repressed_logFC_Genes	Cluster_Golgi_apparatus_GO	0.0329485	0.0250997	0.992151	38.7145	29.4921	1165.78	2	440	72	4802
Cluster_Y7568_Repressed_logFC_Genes	Cluster_nucleic_acid_binding_GO	0.0334534	0.0254249	0.991972	39.3077	29.8743	1165.57	2	382	83	4802
Cluster_YJM1389_Repressed_logFC_Genes	Cluster_cell_cycle_GO	0.0334587	0.0191109	0.985652	39.314	22.4553	1158.14	7	674	95	4802
Cluster_YJM1273_Repressed_logFC_Genes	Cluster_nucleolus_GO	0.0335258	0.0284445	0.994919	39.3928	33.4223	1169.03	1	470	51	4802
Cluster_Y2209_Repressed_logFC_Genes	Cluster_transferase_activity_GO	0.0340054	0.0191296	0.985124	39.9563	22.4773	1157.52	7	350	185	4802
Cluster_BC187_Repressed_logFC_Genes	Cluster_DNA_repair_GO	0.0341847	0.0259889	0.991804	40.167	30.537	1165.37	2	437	72	4802
Cluster_BY4743_Repressed_logFC_Genes	Cluster_catalytic_activity_GO	0.0342274	0.0135827	0.979355	40.2172	15.9597	1150.74	24	1210	132	4802
Cluster_YJM1273_Repressed_logFC_Genes	Cluster_intracellular_GO	0.0344219	0.0194239	0.985002	40.4457	22.8231	1157.38	7	470	137	4802
Cluster_DBVPG1373_Repressed_logFC_Genes	Cluster_ribonucleoprotein_complex_GO	0.0353113	0.0246437	0.989332	41.4908	28.9563	1162.47	3	404	95	4802
Cluster_BC187_Repressed_logFC_Genes	Cluster_molecular_function_GO	0.0354339	0.0153518	0.979918	41.6348	18.0384	1151.4	16	437	269	4802
Cluster_YJM1389_Repressed_logFC_Genes	Cluster_mRNAprocessing_APGcategory	0.0363807	0.0206247	0.984244	42.7473	24.234	1156.49	7	674	94	4802
Cluster_NCYC3290_Repressed_logFC_Genes	Cluster_autophagy_GO	0.0365495	0.0227341	0.986185	42.9457	26.7126	1158.77	5	685	74	4802
Cluster_NCYC3290_Repressed_logFC_Genes	Cluster_nucleic_acid_binding_GO	0.0374592	0.0221366	0.984677	44.0146	26.0105	1157	6	685	83	4802
Cluster_BY4743_Repressed_logFC_Genes	Cluster_nuclear_mRNA_splicing,_via_spliceosome"_GO	0.0377078	0.0292688	0.991561	44.3067	34.3908	1165.08	2	1210	24	4802
Cluster_BY4743_Repressed_logFC_Genes	Cluster_spliceosome_GO	0.0377078	0.0292688	0.991561	44.3067	34.3908	1165.08	2	1210	24	4802
Cluster_BY4743_Repressed_logFC_Genes	Cluster_RNA_elongation_from_RNA_polymerase_II_promoter_GO	0.0377197	0.0324013	0.994682	44.3206	38.0715	1168.75	1	1210	18	4802
Cluster_BY4743_Repressed_logFC_Genes	Cluster_ER-associated_protein_catabolic_process_GO	0.0377197	0.0324013	0.994682	44.3206	38.0715	1168.75	1	1210	18	4802
Cluster_BY4743_Repressed_logFC_Genes	Cluster_RNA_splicing_factor_activity,_transesterification_mechanism"_GO	0.0377197	0.0324013	0.994682	44.3206	38.0715	1168.75	1	1210	18	4802
Cluster_YJM1592_Repressed_logFC_Genes	Cluster_endosome_membrane_GO	0.0379989	0.0293101	0.991311	44.6487	34.4394	1164.79	2	1050	28	4802
Cluster_YPS128_Repressed_logFC_Genes	Cluster_cytoplasm_GO	0.0388849	0.0126967	0.973812	45.6898	14.9186	1144.23	35	364	607	4802
Cluster_YPS128_Repressed_logFC_Genes	Cluster_protein_binding_GO	0.039348	0.0331268	0.993779	46.2339	38.924	1167.69	1	364	64	4802
Cluster_YPS163_Repressed_logFC_Genes	Cluster_mRNA_processing_GO	0.039899	0.0336412	0.993742	46.8813	39.5284	1167.65	1	470	49	4802
Cluster_YJM1389_Repressed_logFC_Genes	Cluster_autophagy_GO	0.0409825	0.0252375	0.984255	48.1544	29.6541	1156.5	5	674	74	4802
Cluster_YJM1592_Repressed_logFC_Genes	Cluster_kinase_activity_GO	0.0411589	0.0226793	0.98152	48.3617	26.6482	1153.29	8	1050	64	4802
Cluster_YJM978_Repressed_logFC_Genes	Cluster_mRNAprocessing_APGcategory	0.0411868	0.0266146	0.985428	48.3945	31.2722	1157.88	4	467	94	4802
Cluster_Y7568_Repressed_logFC_Genes	Cluster_regulation_of_translation_GO	0.0415494	0.022956	0.981407	48.8205	26.9733	1153.15	7	382	165	4802
Cluster_BY4743_Repressed_logFC_Genes	Cluster_ATPase_activity_GO	0.0416218	0.0240635	0.982442	48.9056	28.2746	1154.37	7	1210	50	4802
Cluster_YJM978_Repressed_logFC_Genes	Cluster_metal_ion_binding_GO	0.0416307	0.0189965	0.977366	48.9161	22.3209	1148.41	13	467	211	4802
Cluster_YJM1592_Repressed_logFC_Genes	Cluster_meiosis_GO	0.0416667	0.0295119	0.987845	48.9584	34.6765	1160.72	3	1050	34	4802
Cluster_YJM1592_Repressed_logFC_Genes	Cluster_ATP_binding_GO	0.0419801	0.0145972	0.972617	49.3266	17.1517	1142.82	31	1050	187	4802
Cluster_YJM1273_Repressed_logFC_Genes	Cluster_protein_binding_GO	0.0424571	0.0319214	0.989464	49.8871	37.5076	1162.62	2	470	64	4802
Cluster_YJM1389_Repressed_logFC_Genes	Cluster_protein_binding_GO	0.0426824	0.0277447	0.985062	50.1518	32.6	1157.45	4	674	64	4802
Cluster_YPS163_Repressed_logFC_Genes	Cluster_endoplasmic_reticulum_GO	0.0432052	0.0238597	0.980654	50.7661	28.0351	1152.27	7	470	133	4802
Cluster_Y12_Repressed_logFC_Genes	Cluster_molecular_function_GO	0.0432117	0.0179135	0.974702	50.7737	21.0484	1145.27	17	450	269	4802
Cluster_YJM1592_Repressed_logFC_Genes	Cluster_vacuole_GO	0.0433628	0.025815	0.982452	50.9513	30.3326	1154.38	6	1050	52	4802
Cluster_YJM1389_Repressed_logFC_Genes	Cluster_mitochondrial_inner_membrane_GO	0.0434269	0.0301792	0.986752	51.0266	35.4606	1159.43	3	674	54	4802
Cluster_YJM1273_Repressed_logFC_Genes	Cluster_vesicle-mediated_transport_GO	0.043506	0.0365615	0.993056	51.1195	42.9598	1166.84	1	470	48	4802
Cluster_YPS163_Repressed_logFC_Genes	Cluster_rRNA_processing_GO	0.043506	0.0365615	0.993056	51.1195	42.9598	1166.84	1	470	48	4802
Cluster_YJM1592_Repressed_logFC_Genes	Cluster_vacuolar_membrane_GO	0.043764	0.0273379	0.983574	51.4227	32.122	1155.7	5	1050	46	4802
Cluster_Y12_Repressed_logFC_Genes	Cluster_protein_amino_acid_phosphorylation_GO	0.0442802	0.0371714	0.992891	52.0292	43.6764	1166.65	1	450	50	4802
Cluster_YJM978_Repressed_logFC_Genes	Cluster_vesicle-mediated_transport_GO	0.0447165	0.0375362	0.99282	52.5419	44.105	1166.56	1	467	48	4802
Cluster_YJM978_Repressed_logFC_Genes	Cluster_protein_serine/threonine_kinase_activity_GO	0.0447165	0.0375362	0.99282	52.5419	44.105	1166.56	1	467	48	4802
Cluster_YJM978_Repressed_logFC_Genes	Cluster_protein_kinase_activity_GO	0.0447165	0.0375362	0.99282	52.5419	44.105	1166.56	1	467	48	4802
Cluster_YJM1273_Repressed_logFC_Genes	Cluster_endoplasmic_reticulum_membrane_GO	0.0451085	0.0289376	0.983829	53.0025	34.0017	1156	4	470	92	4802
Cluster_Y12_Repressed_logFC_Genes	Cluster_proteolysis_GO	0.0454696	0.0340274	0.988558	53.4268	39.9822	1161.56	2	450	66	4802
Cluster_Y7568_Repressed_logFC_Genes	Cluster_cytosol_GO	0.045905	0.0314305	0.985525	53.9384	36.9308	1157.99	3	382	96	4802
Cluster_BY4743_Repressed_logFC_Genes	Cluster_regulation_of_translation_GO	0.0460422	0.0158356	0.969793	54.0996	18.6068	1139.51	32	1210	165	4802
Cluster_BY4743_Repressed_logFC_Genes	Cluster_kinase_activity_GO	0.0464798	0.0238998	0.97742	54.6138	28.0823	1148.47	10	1210	64	4802
Cluster_Y2209_Repressed_logFC_Genes	Cluster_kinase_activity_GO	0.0465196	0.038898	0.992378	54.6605	45.7052	1166.04	1	350	64	4802
Cluster_YJM1389_Repressed_logFC_Genes	Cluster_membrane_GO	0.0470622	0.0134301	0.966368	55.2981	15.7804	1135.48	47	674	418	4802
Cluster_Y7568_Repressed_logFC_Genes	Cluster_regulation_of_transcription,_DNA-dependent"_GO	0.0475926	0.0259349	0.978342	55.9213	30.4735	1149.55	7	382	162	4802
Cluster_BY4743_Repressed_logFC_Genes	Cluster_replicative_cell_aging_GO	0.0480656	0.0409471	0.992882	56.4771	48.1128	1166.64	1	1210	17	4802
Cluster_BY4743_Repressed_logFC_Genes	Cluster_transcription_initiation_from_RNA_polymerase_II_promoter_GO	0.0480656	0.0409471	0.992882	56.4771	48.1128	1166.64	1	1210	17	4802
Cluster_BY4743_Repressed_logFC_Genes	Cluster_Peroxisome_APGcategory	0.0480656	0.0409471	0.992882	56.4771	48.1128	1166.64	1	1210	17	4802
Cluster_Y12_Repressed_logFC_Genes	Cluster_mRNA_processing_GO	0.0480804	0.0402282	0.992148	56.4945	47.2681	1165.77	1	450	49	4802
Cluster_Y7568_Repressed_logFC_Genes	Cluster_structural_constituent_of_ribosome_GO	0.0486187	0.036163	0.987544	57.127	42.4915	1160.36	2	382	77	4802
Cluster_BY4743_Repressed_logFC_Genes	Cluster_mRNA_processing_GO	0.0486347	0.0277075	0.979073	57.1458	32.5563	1150.41	7	1210	49	4802
Cluster_YJM1273_Repressed_logFC_Genes	Cluster_membrane_GO	0.0487452	0.0160596	0.967314	57.2756	18.87	1136.59	31	470	418	4802
Cluster_NCYC3290_Repressed_logFC_Genes	Cluster_chromatin_modification_GO	0.048898	0.0367116	0.987814	57.4552	43.1361	1160.68	2	685	42	4802
Cluster_YJM1273_Repressed_logFC_Genes	Cluster_biopolymer_biosynthetic_process_GO	0.0494853	0.0368627	0.987377	58.1452	43.3137	1160.17	2	470	62	4802
Cluster_DBVPG1373_Repressed_logFC_Genes	Cluster_Vacuole_APGcategory	0.0508942	0.0424414	0.991547	59.8007	49.8686	1165.07	1	404	54	4802
Cluster_BY4743_Repressed_logFC_Genes	Cluster_zinc_ion_binding_GO	0.0513237	0.0182736	0.96695	60.3053	21.4715	1136.17	28	1210	146	4802
Cluster_NCYC3290_Repressed_logFC_Genes	Cluster_RNA_splicing_GO	0.0516397	0.043305	0.991665	60.6766	50.8834	1165.21	1	685	31	4802
Cluster_Y7568_Repressed_logFC_Genes	Cluster_rRNA_metabolic_process_GO	0.0516986	0.0383036	0.986605	60.7459	45.0067	1159.26	2	382	76	4802
Cluster_Y2209_Repressed_logFC_Genes	Cluster_nucleic_acid_binding_GO	0.052004	0.0384808	0.986477	61.1047	45.2149	1159.11	2	350	83	4802
Cluster_BY4743_Repressed_logFC_Genes	Cluster_energy_reserve_metabolic_process_GO	0.0521563	0.0366528	0.984497	61.2837	43.067	1156.78	3	1210	28	4802
Cluster_Y12_Repressed_logFC_Genes	Cluster_rRNA_processing_GO	0.0521905	0.0435172	0.991327	61.3238	51.1327	1164.81	1	450	48	4802
Cluster_Y12_Repressed_logFC_Genes	Cluster_protein_serine/threonine_kinase_activity_GO	0.0521905	0.0435172	0.991327	61.3238	51.1327	1164.81	1	450	48	4802
Cluster_Y12_Repressed_logFC_Genes	Cluster_protein_kinase_activity_GO	0.0521905	0.0435172	0.991327	61.3238	51.1327	1164.81	1	450	48	4802
Cluster_BY4743_Repressed_logFC_Genes	Cluster_cytosol_GO	0.0522657	0.0222298	0.969964	61.4122	26.12	1139.71	17	1210	96	4802
Cluster_NCYC3290_Repressed_logFC_Genes	Cluster_DNA_binding_GO	0.0536357	0.022338	0.968702	63.0219	26.2472	1138.22	16	685	164	4802
Cluster_NCYC3290_Repressed_logFC_Genes	Cluster_nucleolus_GO	0.0539766	0.0369293	0.982953	63.4225	43.3919	1154.97	3	685	51	4802
Cluster_Y389_Repressed_logFC_Genes	Cluster_catalytic_activity_GO	0.0550321	0.0284801	0.973448	64.6627	33.4641	1143.8	8	503	132	4802
Cluster_YJM978_Repressed_logFC_Genes	Cluster_Spellman_S_peak	0.0550397	0.0407169	0.985677	64.6716	47.8424	1158.17	2	467	61	4802
Cluster_YJM1389_Repressed_logFC_Genes	Cluster_protein_transporter_activity_GO	0.0552299	0.0461737	0.990944	64.8951	54.2541	1164.36	1	674	31	4802
Cluster_Y389_Repressed_logFC_Genes	Cluster_cellular_response_to_heat_GO	0.0559615	0.0465744	0.990613	65.7548	54.7249	1163.97	1	503	42	4802
Cluster_YPS606_Repressed_logFC_Genes	Cluster_vesicle-mediated_transport_GO	0.0571132	0.0474241	0.990311	67.108	55.7233	1163.62	1	440	48	4802
Cluster_NCYC3290_Repressed_logFC_Genes	Cluster_Pu_Protein_complex	0.0573614	0.0111058	0.953744	67.3996	13.0493	1120.65	124	685	980	4802
Cluster_DBVPG1373_Repressed_logFC_Genes	Cluster_rESR_APGcategory	0.0575003	0.0178682	0.960368	67.5629	20.9951	1128.43	34	404	520	4802
Cluster_BY4743_Repressed_logFC_Genes	Cluster_DNA_recombination_GO	0.0578707	0.0438704	0.986	67.9981	51.5477	1158.55	2	1210	22	4802
Cluster_BY4743_Repressed_logFC_Genes	Cluster_protein_complex_GO	0.0578707	0.0438704	0.986	67.9981	51.5477	1158.55	2	1210	22	4802
Cluster_BY4743_Repressed_logFC_Genes	Cluster_spindle_pole_body_GO	0.0578707	0.0438704	0.986	67.9981	51.5477	1158.55	2	1210	22	4802
Cluster_Y12_Repressed_logFC_Genes	Cluster_binding_GO	0.0584162	0.0366016	0.978185	68.639	43.0069	1149.37	4	450	92	4802
Cluster_BY4743_Repressed_logFC_Genes	Cluster_metabolic_process_GO	0.0584763	0.0245039	0.966028	68.7097	28.7921	1135.08	17	1210	95	4802
Cluster_NCYC3290_Repressed_logFC_Genes	Cluster_tRNAsynth_APGcategory	0.0586517	0.0489201	0.990268	68.9157	57.4811	1163.56	1	685	30	4802
Cluster_BC187_Repressed_logFC_Genes	Cluster_vesicle-mediated_transport_GO	0.058672	0.0486559	0.989984	68.9396	57.1707	1163.23	1	437	48	4802
Cluster_YJM1389_Repressed_logFC_Genes	Cluster_nucleolus_GO	0.058919	0.0400121	0.981093	69.2298	47.0142	1152.78	3	674	51	4802
Cluster_YJM1592_Repressed_logFC_Genes	Cluster_RNAPol_APGcategory	0.0589536	0.0380126	0.979059	69.2705	44.6648	1150.39	4	1050	38	4802
Cluster_YJM1592_Repressed_logFC_Genes	Cluster_mitosis_GO	0.0589536	0.0380126	0.979059	69.2705	44.6648	1150.39	4	1050	38	4802
Cluster_NCYC3290_Repressed_logFC_Genes	Cluster_zinc_ion_binding_GO	0.0589722	0.0254057	0.966433	69.2923	29.8517	1135.56	14	685	146	4802
Cluster_Y12_Repressed_logFC_Genes	Cluster_metal_ion_binding_GO	0.0590218	0.0257605	0.966739	69.3506	30.2686	1135.92	13	450	211	4802
Cluster_YPS128_Repressed_logFC_Genes	Cluster_regulation_of_translation_GO	0.0590344	0.0313983	0.972364	69.3654	36.893	1142.53	7	364	165	4802
Cluster_Y12_Repressed_logFC_Genes	Cluster_zinc_ion_binding_GO	0.0602533	0.0307757	0.970522	70.7976	36.1614	1140.36	8	450	146	4802
Cluster_Y12_Repressed_logFC_Genes	Cluster_transferase_activity_GO	0.0603347	0.0277825	0.967448	70.8933	32.6444	1136.75	11	450	185	4802
Cluster_BY4743_Repressed_logFC_Genes	Cluster_actin_binding_GO	0.0610913	0.0515642	0.990473	71.7823	60.5879	1163.81	1	1210	16	4802
Cluster_BC187_Repressed_logFC_Genes	Cluster_mRNAprocessing_APGcategory	0.0612281	0.0381727	0.976945	71.943	44.8529	1147.91	4	437	94	4802
Cluster_YJM1592_Repressed_logFC_Genes	Cluster_SGDessentials_APGcategory	0.0613297	0.0104071	0.949077	72.0624	12.2283	1115.17	173	1050	871	4802
Cluster_YPS128_Repressed_logFC_Genes	Cluster_ribosome_biogenesis_GO	0.0615417	0.0325735	0.971032	72.3115	38.2739	1140.96	7	364	164	4802
Cluster_BY4743_Repressed_logFC_Genes	Cluster_GenesWithParalogs_E-100_APGcategory	0.0622558	0.0202366	0.957981	73.1506	23.778	1125.63	33	1210	166	4802
Cluster_YPS128_Repressed_logFC_Genes	Cluster_cell_cycle_GO	0.0626089	0.0417868	0.979178	73.5655	49.0995	1150.53	3	364	95	4802
Cluster_YJM978_Repressed_logFC_Genes	Cluster_protein_folding_GO	0.0628292	0.0519732	0.989144	73.8243	61.0685	1162.24	1	467	44	4802
Cluster_BY4743_Repressed_logFC_Genes	Cluster_Induced_regulation_of_transcription_from_RNA_polymerase_II_promoter_GO	0.063227	0.0437964	0.980569	74.2917	51.4608	1152.17	3	1210	27	4802
Cluster_Y7568_Repressed_logFC_Genes	Cluster_Vacuole_APGcategory	0.0634459	0.0523609	0.988915	74.5489	61.5241	1161.98	1	382	54	4802
Cluster_YJM1389_Repressed_logFC_Genes	Cluster_molecular_function_GO	0.064419	0.0209969	0.956578	75.6923	24.6714	1123.98	29	674	269	4802
Cluster_Y12_Repressed_logFC_Genes	Cluster_rRNA_metabolic_process_GO	0.0646808	0.0431809	0.9785	75.9999	50.7376	1149.74	3	450	76	4802
Cluster_YJM1389_Repressed_logFC_Genes	Cluster_protein_amino_acid_phosphorylation_GO	0.0651108	0.0438502	0.978739	76.5052	51.524	1150.02	3	674	50	4802
Cluster_YJM1389_Repressed_logFC_Genes	Cluster_ATPase_activity_GO	0.0651108	0.0438502	0.978739	76.5052	51.524	1150.02	3	674	50	4802
Cluster_YJM978_Repressed_logFC_Genes	Cluster_response_to_DNA_damage_stimulus_GO	0.0654025	0.043649	0.978246	76.8479	51.2876	1149.44	3	467	73	4802
Cluster_Y389_Repressed_logFC_Genes	Cluster_rESR_RPs_APGcategory	0.0656446	0.0346852	0.969041	77.1324	40.7551	1138.62	7	503	117	4802
Cluster_Y7568_Repressed_logFC_Genes	Cluster_Golgi_apparatus_GO	0.0659164	0.0480276	0.982111	77.4518	56.4324	1153.98	2	382	72	4802
Cluster_YJM1389_Repressed_logFC_Genes	Cluster_NuclearProteinTargetting_APGcategory	0.0660296	0.0485896	0.98256	77.5848	57.0928	1154.51	2	674	40	4802
Cluster_NCYC3290_Repressed_logFC_Genes	Cluster_helicase_activity_GO	0.0665622	0.0551999	0.988638	78.2106	64.8599	1161.65	1	685	29	4802
Cluster_BY4743_Repressed_logFC_Genes	Cluster_proteolysis_GO	0.0671416	0.032058	0.964916	78.8914	37.6681	1133.78	11	1210	66	4802
Cluster_YJM978_Repressed_logFC_Genes	Cluster_Golgi_membrane_GO	0.0683426	0.0563054	0.987963	80.3026	66.1588	1160.86	1	467	43	4802
Cluster_BC187_Repressed_logFC_Genes	Cluster_vacuolar_membrane_GO	0.0686625	0.0565168	0.987854	80.6784	66.4072	1160.73	1	437	46	4802
Cluster_NCYC3290_Repressed_logFC_Genes	Cluster_protein_transport_GO	0.068789	0.0270607	0.958272	80.8271	31.7963	1125.97	17	685	168	4802
Cluster_NCYC3290_Repressed_logFC_Genes	Cluster_cell_division_GO	0.068865	0.0403751	0.97151	80.9164	47.4407	1141.52	5	685	67	4802
Cluster_Y389_Repressed_logFC_Genes	Cluster_endoplasmic_reticulum_membrane_GO	0.0691326	0.040142	0.971009	81.2308	47.1668	1140.94	5	503	92	4802
Cluster_YJM978_Repressed_logFC_Genes	Cluster_DNA_repair_GO	0.069955	0.0464077	0.976453	82.1971	54.529	1147.33	3	467	72	4802
Cluster_YJM1592_Repressed_logFC_Genes	Cluster_ER-associated_protein_catabolic_process_GO	0.070752	0.0590772	0.988325	83.1336	69.4157	1161.28	1	1050	18	4802
Cluster_YJM1389_Repressed_logFC_Genes	Cluster_nuclease_activity_GO	0.0708209	0.0585412	0.98772	83.2146	68.7859	1160.57	1	674	29	4802
Cluster_YJM1389_Repressed_logFC_Genes	Cluster_helicase_activity_GO	0.0708209	0.0585412	0.98772	83.2146	68.7859	1160.57	1	674	29	4802
Cluster_YPS163_Repressed_logFC_Genes	Cluster_cytoplasm_GO	0.0712858	0.0186432	0.947357	83.7608	21.9058	1113.14	49	470	607	4802
Cluster_BY4743_Repressed_logFC_Genes	Cluster_sporulation_resulting_in_formation_of_a_cellular_spore_GO	0.0713546	0.053366	0.982011	83.8417	62.705	1153.86	2	1210	21	4802
Cluster_BY4743_Repressed_logFC_Genes	Cluster_Repressed_regulation_of_transcription_from_RNA_polymerase_II_promoter_GO	0.0713546	0.053366	0.982011	83.8417	62.705	1153.86	2	1210	21	4802
Cluster_DBVPG1373_Repressed_logFC_Genes	Cluster_mRNA_processing_GO	0.0731707	0.0599887	0.986818	85.9756	70.4867	1159.51	1	404	49	4802
Cluster_NCYC3290_Repressed_logFC_Genes	Cluster_endosome_GO	0.0731938	0.0488126	0.975619	86.0027	57.3548	1146.35	3	685	48	4802
Cluster_Y12_Repressed_logFC_Genes	Cluster_RNA_binding_GO	0.0734345	0.0422488	0.968814	86.2855	49.6423	1138.36	5	450	102	4802
Cluster_Y389_Repressed_logFC_Genes	Cluster_DNA_replication_GO	0.0735304	0.060409	0.986879	86.3982	70.9806	1159.58	1	503	39	4802
Cluster_Y12_Repressed_logFC_Genes	Cluster_autophagy_GO	0.0736043	0.0485676	0.974963	86.4851	57.0669	1145.58	3	450	74	4802
Cluster_Y12_Repressed_logFC_Genes	Cluster_ESR_APGcategory	0.0742256	0.0179163	0.943691	87.2151	21.0517	1108.84	60	450	758	4802
Cluster_BC187_Repressed_logFC_Genes	Cluster_Spellman_S_peak	0.0742278	0.053696	0.979468	87.2177	63.0928	1150.87	2	437	61	4802
Cluster_YJM978_Repressed_logFC_Genes	Cluster_chromatin_modification_GO	0.074311	0.0609643	0.986653	87.3154	71.6331	1159.32	1	467	42	4802
Cluster_YJM1592_Repressed_logFC_Genes	Cluster_protein_serine/threonine_kinase_activity_GO	0.0744792	0.041968	0.967489	87.5131	49.3124	1136.8	6	1050	48	4802
Cluster_YJM1592_Repressed_logFC_Genes	Cluster_protein_kinase_activity_GO	0.0744792	0.041968	0.967489	87.5131	49.3124	1136.8	6	1050	48	4802
Cluster_YPS128_Repressed_logFC_Genes	Cluster_mitochondrial_inner_membrane_GO	0.0757884	0.0619649	0.986176	89.0514	72.8088	1158.76	1	364	54	4802
Cluster_BY4743_Repressed_logFC_Genes	Cluster_regulation_of_transcription_GO	0.0763927	0.0520959	0.975703	89.7614	61.2127	1146.45	3	1210	26	4802
Cluster_NCYC3290_Repressed_logFC_Genes	Cluster_mitosis_GO	0.0764463	0.055676	0.97923	89.8244	65.4193	1150.6	2	685	38	4802
Cluster_Y2209_Repressed_logFC_Genes	Cluster_rRNA_metabolic_process_GO	0.0765217	0.0550689	0.978547	89.913	64.706	1149.79	2	350	76	4802
Cluster_YJM1592_Repressed_logFC_Genes	Cluster_cellular_response_to_heat_GO	0.077348	0.0457417	0.968394	90.8839	53.7465	1137.86	5	1050	42	4802
Cluster_BY4743_Repressed_logFC_Genes	Cluster_endonuclease_activity_GO	0.0774258	0.0646759	0.98725	90.9753	75.9942	1160.02	1	1210	15	4802
Cluster_BY4743_Repressed_logFC_Genes	Cluster_peroisome_organization_GO	0.0774258	0.0646759	0.98725	90.9753	75.9942	1160.02	1	1210	15	4802
Cluster_BY4743_Repressed_logFC_Genes	Cluster_mitotic_sister_chromatid_segregation_GO	0.0774258	0.0646759	0.98725	90.9753	75.9942	1160.02	1	1210	15	4802
Cluster_YJM1592_Repressed_logFC_Genes	Cluster_GeneralTFs_APGcategory	0.0781018	0.0576418	0.97954	91.7696	67.7291	1150.96	2	1050	24	4802
Cluster_BY4743_Repressed_logFC_Genes	Cluster_regulation_of_transcription_from_RNA_polymerase_II_promoter_GO	0.0787337	0.0469495	0.968216	92.5121	55.1657	1137.65	5	1210	36	4802
Cluster_BY4743_Repressed_logFC_Genes	Cluster_ligase_activity_GO	0.0787337	0.0469495	0.968216	92.5121	55.1657	1137.65	5	1210	36	4802
Cluster_YJM1273_Repressed_logFC_Genes	Cluster_mating_projection_tip_GO	0.0789544	0.0645722	0.985618	92.7714	75.8723	1158.1	1	470	41	4802
Cluster_YJM1273_Repressed_logFC_Genes	Cluster_cellular_bud_neck_GO	0.0789544	0.0645722	0.985618	92.7714	75.8723	1158.1	1	470	41	4802
Cluster_YPS163_Repressed_logFC_Genes	Cluster_cellular_bud_neck_GO	0.0789544	0.0645722	0.985618	92.7714	75.8723	1158.1	1	470	41	4802
Cluster_YJM1389_Repressed_logFC_Genes	Cluster_endosome_GO	0.0792909	0.0524609	0.97317	93.1668	61.6416	1143.47	3	674	48	4802
Cluster_Y2209_Repressed_logFC_Genes	Cluster_DNA_binding_GO	0.0797812	0.0408535	0.961072	93.7429	48.0029	1129.26	7	350	164	4802
Cluster_YJM1389_Repressed_logFC_Genes	Cluster_establishment_of_protein_localization_GO	0.0800966	0.0657982	0.985702	94.1135	77.3129	1158.2	1	674	28	4802
Cluster_YJM978_Repressed_logFC_Genes	Cluster_mating_projection_tip_GO	0.080768	0.0659698	0.985202	94.9024	77.5145	1157.61	1	467	41	4802
Cluster_YPS128_Repressed_logFC_Genes	Cluster_Golgi_apparatus_GO	0.0810487	0.0580811	0.977032	95.2322	68.2453	1148.01	2	364	72	4802
Cluster_Y2209_Repressed_logFC_Genes	Cluster_zinc_ion_binding_GO	0.083052	0.0443885	0.961336	97.5861	52.1565	1129.57	6	350	146	4802
Cluster_YJM978_Repressed_logFC_Genes	Cluster_cytosol_GO	0.0834184	0.0473132	0.963895	98.0166	55.593	1132.58	5	467	96	4802
Cluster_Y12_Repressed_logFC_Genes	Cluster_cellular_response_to_heat_GO	0.0847652	0.0690217	0.984256	99.5991	81.1005	1156.5	1	450	42	4802
Cluster_YJM1389_Repressed_logFC_Genes	Cluster_endoplasmic_reticulum_membrane_GO	0.0849077	0.0419843	0.957077	99.7665	49.3316	1124.57	8	674	92	4802
Cluster_Y2209_Repressed_logFC_Genes	Cluster_autophagy_GO	0.085259	0.0608136	0.975555	100.179	71.456	1146.28	2	350	74	4802
Cluster_NCYC3290_Repressed_logFC_Genes	Cluster_Induced_regulation_of_transcription_from_RNA_polymerase_II_promoter_GO	0.0855051	0.0700176	0.984512	100.468	82.2707	1156.8	1	685	27	4802
Cluster_NCYC3290_Repressed_logFC_Genes	Cluster_Sterols_APGcategory	0.0855051	0.0700176	0.984512	100.468	82.2707	1156.8	1	685	27	4802
Cluster_YPS163_Repressed_logFC_Genes	Cluster_NuclearProteinTargetting_APGcategory	0.0858367	0.0698796	0.984043	100.858	82.1085	1156.25	1	470	40	4802
Cluster_BY4743_Repressed_logFC_Genes	Cluster_protein_binding_GO	0.0862626	0.0397829	0.95352	101.359	46.7449	1120.39	11	1210	64	4802
Cluster_YJM1592_Repressed_logFC_Genes	Cluster_Endocytosis_APGcategory	0.0864183	0.0714614	0.985043	101.542	83.9671	1157.43	1	1050	17	4802
Cluster_YJM1592_Repressed_logFC_Genes	Cluster_Peroxisome_APGcategory	0.0864183	0.0714614	0.985043	101.542	83.9671	1157.43	1	1050	17	4802
Cluster_YJM1389_Repressed_logFC_Genes	Cluster_transcription_factor_activity_GO	0.0873716	0.0572627	0.969891	102.662	67.2837	1139.62	3	674	47	4802
Cluster_BY4743_Repressed_logFC_Genes	Cluster_small_GTPase_mediated_signal_transduction_GO	0.0876742	0.0646032	0.976929	103.017	75.9088	1147.89	2	1210	20	4802
Cluster_BY4743_Repressed_logFC_Genes	Cluster_response_to_osmotic_stress_GO	0.0876742	0.0646032	0.976929	103.017	75.9088	1147.89	2	1210	20	4802
Cluster_BY4743_Repressed_logFC_Genes	Cluster_cytoplasmic_vesicle_GO	0.0876742	0.0646032	0.976929	103.017	75.9088	1147.89	2	1210	20	4802
Cluster_BY4743_Repressed_logFC_Genes	Cluster_telomere_maintenance_GO	0.0876742	0.0646032	0.976929	103.017	75.9088	1147.89	2	1210	20	4802
Cluster_Y2209_Repressed_logFC_Genes	Cluster_metal_ion_binding_GO	0.0877471	0.0394114	0.951664	103.103	46.3084	1118.21	10	350	211	4802
Cluster_YJM978_Repressed_logFC_Genes	Cluster_intracellular_protein_transport_GO	0.0877494	0.0713422	0.983593	103.106	83.8271	1155.72	1	467	40	4802
Cluster_YJM978_Repressed_logFC_Genes	Cluster_NuclearProteinTargetting_APGcategory	0.0877494	0.0713422	0.983593	103.106	83.8271	1155.72	1	467	40	4802
Cluster_Y389_Repressed_logFC_Genes	Cluster_cytosolic_large_ribosomal_subunit_GO	0.0880069	0.0716052	0.983598	103.408	84.1361	1155.73	1	503	37	4802
Cluster_BY4743_Repressed_logFC_Genes	Cluster_transport_GO	0.0883345	0.0215867	0.933252	103.793	25.3644	1096.57	58	1210	269	4802
Cluster_BY4743_Repressed_logFC_Genes	Cluster_cytoplasm_GO	0.0883846	0.015223	0.926838	103.852	17.887	1089.03	139	1210	607	4802
Cluster_YJM1592_Repressed_logFC_Genes	Cluster_hydrolase_activity_GO	0.0889303	0.0267907	0.93786	104.493	31.4791	1101.99	33	1050	187	4802
Cluster_Y7568_Repressed_logFC_Genes	Cluster_mRNA_processing_GO	0.089021	0.0721652	0.983144	104.6	84.7941	1155.19	1	382	49	4802
Cluster_NCYC3290_Repressed_logFC_Genes	Cluster_kinase_activity_GO	0.0891693	0.0507399	0.961571	104.774	59.6194	1129.85	5	685	64	4802
Cluster_YJM1273_Repressed_logFC_Genes	Cluster_MitochondrialRPs_APGcategory	0.089791	0.0640253	0.974234	105.504	75.2297	1144.72	2	470	54	4802
Cluster_YJM1273_Repressed_logFC_Genes	Cluster_mitochondrial_inner_membrane_GO	0.089791	0.0640253	0.974234	105.504	75.2297	1144.72	2	470	54	4802
Cluster_YJM1273_Repressed_logFC_Genes	Cluster_mRNAprocessing_APGcategory	0.0902394	0.0506903	0.960451	106.031	59.5611	1128.53	5	470	94	4802
Cluster_Y12_Repressed_logFC_Genes	Cluster_mating_projection_tip_GO	0.0917812	0.0743943	0.982613	107.843	87.4133	1154.57	1	450	41	4802
Cluster_YJM1592_Repressed_logFC_Genes	Cluster_ubiquitin-protein_ligase_activity_GO	0.0929435	0.06768	0.974737	109.209	79.524	1145.32	2	1050	23	4802
Cluster_YPS163_Repressed_logFC_Genes	Cluster_Mitochondria_APGcategory	0.0932783	0.0755742	0.982296	109.602	88.7997	1154.2	1	470	39	4802
Cluster_YJM1592_Repressed_logFC_Genes	Cluster_helicase_activity_GO	0.0937622	0.0621975	0.968435	110.171	73.0821	1137.91	3	1050	29	4802
Cluster_Y7568_Repressed_logFC_Genes	Cluster_proteolysis_GO	0.0940643	0.0665917	0.972527	110.526	78.2452	1142.72	2	382	66	4802
Cluster_YPS163_Repressed_logFC_Genes	Cluster_cell_division_GO	0.094524	0.0608783	0.966354	111.066	71.532	1135.47	3	470	67	4802
Cluster_Y12_Repressed_logFC_Genes	Cluster_hydrolase_activity_GO	0.0947536	0.0396018	0.944848	111.335	46.5321	1110.2	12	450	187	4802
Cluster_Y7568_Repressed_logFC_Genes	Cluster_vesicle-mediated_transport_GO	0.0951801	0.0768515	0.981671	111.837	90.3005	1153.46	1	382	48	4802
Cluster_YPS128_Repressed_logFC_Genes	Cluster_intracellular_GO	0.095314	0.0500267	0.954713	111.994	58.7814	1121.79	6	364	137	4802
Cluster_YJM1389_Repressed_logFC_Genes	Cluster_kinase_activity_GO	0.0975036	0.0548212	0.957318	114.567	64.4149	1124.85	5	674	64	4802
Cluster_BY4743_Repressed_logFC_Genes	Cluster_pyridoal_phosphate_binding_GO	0.097817	0.0807554	0.982938	114.935	94.8876	1154.95	1	1210	14	4802
Cluster_BY4743_Repressed_logFC_Genes	Cluster_peroisomal_membrane_GO	0.097817	0.0807554	0.982938	114.935	94.8876	1154.95	1	1210	14	4802
Cluster_NCYC3290_Repressed_logFC_Genes	Cluster_Vacuole_APGcategory	0.0985537	0.0590731	0.960519	115.801	69.4109	1128.61	4	685	54	4802
Cluster_DBVPG1373_Repressed_logFC_Genes	Cluster_intracellular_GO	0.0987489	0.0491666	0.950418	116.03	57.7708	1116.74	7	404	137	4802
Cluster_YPS606_Repressed_logFC_Genes	Cluster_cellular_bud_neck_GO	0.0988791	0.0797683	0.980889	116.183	93.7278	1152.54	1	440	41	4802
Cluster_Y389_Repressed_logFC_Genes	Cluster_translation_GO	0.0989717	0.0424588	0.943487	116.292	49.8891	1108.6	11	503	155	4802
Cluster_YPS128_Repressed_logFC_Genes	Cluster_protein_transport_GO	0.0991893	0.0471473	0.947958	116.547	55.3981	1113.85	8	364	168	4802
Cluster_Y12_Repressed_logFC_Genes	Cluster_NuclearProteinTargetting_APGcategory	0.099337	0.0801356	0.980799	116.721	94.1593	1152.44	1	450	40	4802
Cluster_NCYC3290_Repressed_logFC_Genes	Cluster_transferase_activity_GO	0.100349	0.0348661	0.934517	117.91	40.9677	1098.06	20	685	185	4802
Cluster_BC187_Repressed_logFC_Genes	Cluster_mating_projection_tip_GO	0.101103	0.0814435	0.98034	118.796	95.6961	1151.9	1	437	41	4802
Cluster_BC187_Repressed_logFC_Genes	Cluster_cellular_bud_neck_GO	0.101103	0.0814435	0.98034	118.796	95.6961	1151.9	1	437	41	4802
Cluster_YJM1389_Repressed_logFC_Genes	Cluster_regulation_of_transcription_from_RNA_polymerase_II_promoter_GO	0.101383	0.0720948	0.970712	119.125	84.7114	1140.59	2	674	36	4802
Cluster_BC187_Repressed_logFC_Genes	Cluster_Spellman_S/G2_peak	0.101435	0.0560188	0.954583	119.186	65.8221	1121.64	5	437	99	4802
Cluster_YJM978_Repressed_logFC_Genes	Cluster_RNAPol_APGcategory	0.103438	0.0832705	0.979832	121.54	97.8428	1151.3	1	467	38	4802
Cluster_YJM1592_Repressed_logFC_Genes	Cluster_nucleic_acid_binding_GO	0.103525	0.0431635	0.939638	121.642	50.7171	1104.07	13	1050	83	4802
Cluster_DBVPG1373_Repressed_logFC_Genes	Cluster_peptidase_activity_GO	0.104414	0.0838671	0.979453	122.686	98.5438	1150.86	1	404	44	4802
Cluster_YJM978_Repressed_logFC_Genes	Cluster_binding_GO	0.10445	0.0575359	0.953086	122.729	67.6047	1119.88	5	467	92	4802
Cluster_YJM1389_Repressed_logFC_Genes	Cluster_metal_ion_binding_GO	0.104982	0.0342495	0.929267	123.354	40.2432	1091.89	23	674	211	4802
Cluster_YJM1592_Repressed_logFC_Genes	Cluster_pre-autophagosomal_structure_GO	0.105298	0.0861375	0.98084	123.725	101.212	1152.49	1	1050	16	4802
Cluster_YJM1592_Repressed_logFC_Genes	Cluster_CVT_pathway_GO	0.105298	0.0861375	0.98084	123.725	101.212	1152.49	1	1050	16	4802
Cluster_YJM1273_Repressed_logFC_Genes	Cluster_molecular_function_GO	0.106285	0.0360941	0.929809	124.885	42.4106	1092.53	20	470	269	4802
Cluster_YPS606_Repressed_logFC_Genes	Cluster_intracellular_protein_transport_GO	0.106782	0.0857256	0.978944	125.469	100.728	1150.26	1	440	40	4802
Cluster_DBVPG1373_Repressed_logFC_Genes	Cluster_rRNA_metabolic_process_GO	0.106865	0.0676992	0.960834	125.566	79.5466	1128.98	3	404	76	4802
Cluster_BY4743_Repressed_logFC_Genes	Cluster_cytokinesis_GO	0.107321	0.0777895	0.970469	126.102	91.4027	1140.3	2	1210	19	4802
Cluster_Y12_Repressed_logFC_Genes	Cluster_DNA_replication_GO	0.107469	0.0862642	0.978795	126.276	101.36	1150.08	1	450	39	4802
Cluster_Y389_Repressed_logFC_Genes	Cluster_vesicle-mediated_transport_GO	0.107686	0.0756216	0.967936	126.531	88.8554	1137.32	2	503	48	4802
Cluster_BY4743_Repressed_logFC_Genes	Cluster_membrane_fraction_GO	0.108095	0.0620605	0.953966	127.012	72.9211	1120.91	5	1210	34	4802
Cluster_YJM1592_Repressed_logFC_Genes	Cluster_DNA_repair_GO	0.108418	0.0475972	0.939179	127.391	55.9267	1103.54	11	1050	72	4802
Cluster_YJM1592_Repressed_logFC_Genes	Cluster_transcription_GO	0.108903	0.0323028	0.923399	127.961	37.9558	1084.99	31	1050	174	4802
Cluster_BC187_Repressed_logFC_Genes	Cluster_intracellular_protein_transport_GO	0.109111	0.0874652	0.978354	128.205	102.772	1149.57	1	437	40	4802
Cluster_BC187_Repressed_logFC_Genes	Cluster_NuclearProteinTargetting_APGcategory	0.109111	0.0874652	0.978354	128.205	102.772	1149.57	1	437	40	4802
Cluster_NCYC3290_Repressed_logFC_Genes	Cluster_nuclear_pore_GO	0.109421	0.0883132	0.978893	128.57	103.768	1150.2	1	685	25	4802
Cluster_YJM1592_Repressed_logFC_Genes	Cluster_tRNAprocessing_APGcategory	0.109427	0.0714285	0.962001	128.577	83.9285	1130.35	3	1050	28	4802
Cluster_DBVPG1373_Repressed_logFC_Genes	Cluster_nucleus_GO	0.110647	0.0283514	0.917704	130.01	33.3129	1078.3	41	404	584	4802
Cluster_Y389_Repressed_logFC_Genes	Cluster_cytosol_GO	0.11076	0.0572523	0.946492	130.143	67.2715	1112.13	6	503	96	4802
Cluster_Y2209_Repressed_logFC_Genes	Cluster_protein_amino_acid_phosphorylation_GO	0.110824	0.0885456	0.977722	130.218	104.041	1148.82	1	350	50	4802
Cluster_YPS128_Repressed_logFC_Genes	Cluster_endosome_GO	0.111032	0.0887321	0.9777	130.463	104.26	1148.8	1	364	48	4802
Cluster_BC187_Repressed_logFC_Genes	Cluster_intracellular_GO	0.111617	0.0522211	0.940604	131.15	61.3598	1105.21	8	437	137	4802
Cluster_BY4743_Repressed_logFC_Genes	Cluster_vesicle-mediated_transport_GO	0.111869	0.0551881	0.94332	131.446	64.846	1108.4	8	1210	48	4802
Cluster_YJM1389_Repressed_logFC_Genes	Cluster_PAC_APGcategory	0.11198	0.0269851	0.915005	131.577	31.7075	1075.13	48	674	403	4802
Cluster_YJM978_Repressed_logFC_Genes	Cluster_cytosolic_large_ribosomal_subunit_GO	0.112227	0.0898679	0.977641	131.867	105.595	1148.73	1	467	37	4802
Cluster_DBVPG1373_Repressed_logFC_Genes	Cluster_PAC_APGcategory	0.112715	0.0336951	0.92098	132.44	39.5917	1082.15	27	404	403	4802
Cluster_Y389_Repressed_logFC_Genes	Cluster_oidation_reduction_GO	0.11357	0.066218	0.952648	133.445	77.8062	1119.36	4	503	72	4802
Cluster_YJM978_Repressed_logFC_Genes	Cluster_response_to_drug_GO	0.114074	0.0795444	0.965471	134.037	93.4647	1134.43	2	467	51	4802
Cluster_YJM1389_Repressed_logFC_Genes	Cluster_nuclear_pore_GO	0.115226	0.0926583	0.977432	135.391	108.874	1148.48	1	674	25	4802
Cluster_YJM1389_Repressed_logFC_Genes	Cluster_ER_to_Golgi_vesicle-mediated_transport_GO	0.115226	0.0926583	0.977432	135.391	108.874	1148.48	1	674	25	4802
Cluster_YPS606_Repressed_logFC_Genes	Cluster_Mitochondria_APGcategory	0.115268	0.0920683	0.976801	135.44	108.18	1147.74	1	440	39	4802
Cluster_YPS606_Repressed_logFC_Genes	Cluster_mitochondrial_inner_membrane_GO	0.115727	0.0804961	0.964769	135.979	94.5829	1133.6	2	440	54	4802
Cluster_YJM978_Repressed_logFC_Genes	Cluster_hydrolase_activity_GO	0.115989	0.045462	0.929473	136.287	53.4179	1092.13	13	467	187	4802
Cluster_YJM1273_Repressed_logFC_Genes	Cluster_transcription_GO	0.116353	0.0469341	0.930582	136.715	55.1476	1093.43	12	470	174	4802
Cluster_YJM1592_Repressed_logFC_Genes	Cluster_protein_transport_GO	0.116545	0.0345242	0.917979	136.94	40.5659	1078.63	30	1050	168	4802
Cluster_BY4743_Repressed_logFC_Genes	Cluster_Golgi_membrane_GO	0.116784	0.0597819	0.942998	137.221	70.2437	1108.02	7	1210	43	4802
Cluster_Y389_Repressed_logFC_Genes	Cluster_metabolic_process_GO	0.117096	0.0600104	0.942914	137.588	70.5122	1107.92	6	503	95	4802
Cluster_BC187_Repressed_logFC_Genes	Cluster_hydrolase_activity_GO	0.117533	0.0472445	0.929711	138.101	55.5123	1092.41	12	437	187	4802
Cluster_BC187_Repressed_logFC_Genes	Cluster_nucleotide_binding_GO	0.117536	0.0424917	0.924956	138.105	49.9277	1086.82	16	437	237	4802
Cluster_YJM978_Repressed_logFC_Genes	Cluster_protein_binding_GO	0.117846	0.0739906	0.956145	138.469	86.939	1123.47	3	467	64	4802
Cluster_BC187_Repressed_logFC_Genes	Cluster_Vacuole_APGcategory	0.118647	0.0823083	0.963661	139.41	96.7123	1132.3	2	437	54	4802
Cluster_NCYC3290_Repressed_logFC_Genes	Cluster_Golgi_membrane_GO	0.119133	0.075503	0.95637	139.981	88.716	1123.73	3	685	43	4802
Cluster_DBVPG1373_Repressed_logFC_Genes	Cluster_autophagy_GO	0.119214	0.0745339	0.955319	140.076	87.5773	1122.5	3	404	74	4802
Cluster_YJM1273_Repressed_logFC_Genes	Cluster_peptidyl-amino_acid_modification_GO	0.119369	0.0951935	0.975825	140.259	111.852	1146.59	1	470	36	4802
Cluster_YPS163_Repressed_logFC_Genes	Cluster_regulation_of_transcription_from_RNA_polymerase_II_promoter_GO	0.119369	0.0951935	0.975825	140.259	111.852	1146.59	1	470	36	4802
Cluster_YPS128_Repressed_logFC_Genes	Cluster_transport_GO	0.120476	0.04429	0.923814	141.559	52.0408	1085.48	15	364	269	4802
Cluster_YPS606_Repressed_logFC_Genes	Cluster_transferase_activity_GO	0.120743	0.0482925	0.927549	141.873	56.7437	1089.87	12	440	185	4802
Cluster_Y7568_Repressed_logFC_Genes	Cluster_mRNAprocessing_APGcategory	0.120828	0.069449	0.948621	141.973	81.6026	1114.63	4	382	94	4802
Cluster_YJM1273_Repressed_logFC_Genes	Cluster_rRNA_metabolic_process_GO	0.121643	0.0701432	0.9485	142.931	82.4183	1114.49	4	470	76	4802
Cluster_YJM978_Repressed_logFC_Genes	Cluster_regulation_of_transcription_from_RNA_polymerase_II_promoter_GO	0.121703	0.096915	0.975212	143.001	113.875	1145.87	1	467	36	4802
Cluster_Y7568_Repressed_logFC_Genes	Cluster_Spellman_G1_peak	0.121954	0.0485652	0.926612	143.296	57.0641	1088.77	12	382	213	4802
Cluster_DBVPG1373_Repressed_logFC_Genes	Cluster_RPs_APGcategory	0.122064	0.0587549	0.936691	143.425	69.037	1100.61	7	404	132	4802
Cluster_YJM978_Repressed_logFC_Genes	Cluster_protein_amino_acid_phosphorylation_GO	0.122363	0.0847146	0.962351	143.777	99.5397	1130.76	2	467	50	4802
Cluster_BY4743_Repressed_logFC_Genes	Cluster_membrane_GO	0.122678	0.0227725	0.900095	144.147	26.7577	1057.61	95	1210	418	4802
Cluster_YPS128_Repressed_logFC_Genes	Cluster_mitochondrion_GO	0.122732	0.0429021	0.92017	144.21	50.41	1081.2	17	364	298	4802
Cluster_BY4743_Repressed_logFC_Genes	Cluster_eocytosis_GO	0.123141	0.100311	0.97717	144.691	117.865	1148.17	1	1210	13	4802
Cluster_BY4743_Repressed_logFC_Genes	Cluster_etrinsic_to_membrane_GO	0.123141	0.100311	0.97717	144.691	117.865	1148.17	1	1210	13	4802
Cluster_BY4743_Repressed_logFC_Genes	Cluster_cytoskeleton_organization_GO	0.123141	0.100311	0.97717	144.691	117.865	1148.17	1	1210	13	4802
Cluster_BY4743_Repressed_logFC_Genes	Cluster_ATP-dependent_helicase_activity_GO	0.123141	0.100311	0.97717	144.691	117.865	1148.17	1	1210	13	4802
Cluster_BY4743_Repressed_logFC_Genes	Cluster_microtubule_GO	0.123141	0.100311	0.97717	144.691	117.865	1148.17	1	1210	13	4802
Cluster_BY4743_Repressed_logFC_Genes	Cluster_transcription_activator_activity_GO	0.123141	0.100311	0.97717	144.691	117.865	1148.17	1	1210	13	4802
Cluster_Y2209_Repressed_logFC_Genes	Cluster_cell_division_GO	0.123395	0.0849736	0.961578	144.989	99.844	1129.85	2	350	67	4802
Cluster_YJM1592_Repressed_logFC_Genes	Cluster_cellular_component_GO	0.123486	0.0650506	0.941565	145.096	76.4345	1106.34	6	1050	44	4802
Cluster_NCYC3290_Repressed_logFC_Genes	Cluster_mRNA_export_from_nucleus_GO	0.123585	0.0989453	0.97536	145.212	116.261	1146.05	1	685	24	4802
Cluster_NCYC3290_Repressed_logFC_Genes	Cluster_nuclear_mRNA_splicing,_via_spliceosome"_GO	0.123585	0.0989453	0.97536	145.212	116.261	1146.05	1	685	24	4802
Cluster_NCYC3290_Repressed_logFC_Genes	Cluster_GeneralTFs_APGcategory	0.123585	0.0989453	0.97536	145.212	116.261	1146.05	1	685	24	4802
Cluster_NCYC3290_Repressed_logFC_Genes	Cluster_piecemeal_microautophagy_of_nucleus_GO	0.123585	0.0989453	0.97536	145.212	116.261	1146.05	1	685	24	4802
Cluster_YPS606_Repressed_logFC_Genes	Cluster_cytoskeleton_GO	0.124373	0.0988131	0.97444	146.138	116.105	1144.97	1	440	38	4802
Cluster_YJM1592_Repressed_logFC_Genes	Cluster_regulation_of_transcription,_DNA-dependent"_GO	0.12476	0.036907	0.912147	146.593	43.3657	1071.77	29	1050	162	4802
Cluster_YJM1389_Repressed_logFC_Genes	Cluster_membrane_fraction_GO	0.124818	0.086995	0.962177	146.661	102.219	1130.56	2	674	34	4802
Cluster_Y389_Repressed_logFC_Genes	Cluster_cytoplasm_GO	0.124847	0.0277291	0.902882	146.695	32.5817	1060.89	55	503	607	4802
Cluster_Y2209_Repressed_logFC_Genes	Cluster_protein_serine/threonine_kinase_activity_GO	0.124969	0.0990083	0.97404	146.839	116.335	1144.5	1	350	48	4802
Cluster_Y2209_Repressed_logFC_Genes	Cluster_protein_kinase_activity_GO	0.124969	0.0990083	0.97404	146.839	116.335	1144.5	1	350	48	4802
Cluster_YPS606_Repressed_logFC_Genes	Cluster_cell_division_GO	0.125178	0.0779045	0.952727	147.084	91.5378	1119.45	3	440	67	4802
Cluster_BY4743_Repressed_logFC_Genes	Cluster_response_to_stress_GO	0.127427	0.0615488	0.934122	149.727	72.3198	1097.59	8	1210	47	4802
Cluster_YJM1389_Repressed_logFC_Genes	Cluster_Golgi_membrane_GO	0.127454	0.0800598	0.952605	149.758	94.0703	1119.31	3	674	43	4802
Cluster_YJM1592_Repressed_logFC_Genes	Cluster_peroisome_organization_GO	0.12796	0.103416	0.975456	150.353	121.514	1146.16	1	1050	15	4802
Cluster_YJM1592_Repressed_logFC_Genes	Cluster_mitotic_sister_chromatid_segregation_GO	0.12796	0.103416	0.975456	150.353	121.514	1146.16	1	1050	15	4802
Cluster_YJM1389_Repressed_logFC_Genes	Cluster_GeneralTFs_APGcategory	0.12981	0.103535	0.973726	152.527	121.654	1144.13	1	674	24	4802
Cluster_YJM1389_Repressed_logFC_Genes	Cluster_piecemeal_microautophagy_of_nucleus_GO	0.12981	0.103535	0.973726	152.527	121.654	1144.13	1	674	24	4802
Cluster_Y12_Repressed_logFC_Genes	Cluster_nucleolus_GO	0.130329	0.0895609	0.959232	153.137	105.234	1127.1	2	450	51	4802
Cluster_Y12_Repressed_logFC_Genes	Cluster_mitochondrion_GO	0.131136	0.0410477	0.909912	154.085	48.231	1069.15	22	450	298	4802
Cluster_YJM978_Repressed_logFC_Genes	Cluster_mRNA_processing_GO	0.131182	0.0901452	0.958963	154.139	105.921	1126.78	2	467	49	4802
Cluster_BC187_Repressed_logFC_Genes	Cluster_endoplasmic_reticulum_GO	0.132629	0.0602019	0.927573	155.839	70.7372	1089.9	8	437	133	4802
Cluster_YPS163_Repressed_logFC_Genes	Cluster_membrane_GO	0.133553	0.0351535	0.901601	156.925	41.3054	1059.38	34	470	418	4802
Cluster_YJM1592_Repressed_logFC_Genes	Cluster_zinc_ion_binding_GO	0.133994	0.0407456	0.906751	157.443	47.8761	1065.43	26	1050	146	4802
Cluster_YJM1273_Repressed_logFC_Genes	Cluster_rRNA_processing_GO	0.137524	0.0940184	0.956494	161.591	110.472	1123.88	2	470	48	4802
Cluster_YPS163_Repressed_logFC_Genes	Cluster_endosome_GO	0.137524	0.0940184	0.956494	161.591	110.472	1123.88	2	470	48	4802
Cluster_YJM1389_Repressed_logFC_Genes	Cluster_response_to_drug_GO	0.137865	0.0789456	0.941081	161.991	92.7611	1105.77	4	674	51	4802
Cluster_DBVPG1373_Repressed_logFC_Genes	Cluster_intracellular_protein_transport_GO	0.137903	0.108607	0.970704	162.036	127.613	1140.58	1	404	40	4802
Cluster_YPS128_Repressed_logFC_Genes	Cluster_transcription_GO	0.1388	0.0597203	0.92092	163.09	70.1714	1082.08	9	364	174	4802
Cluster_NCYC3290_Repressed_logFC_Genes	Cluster_pseudohyphal_growth_GO	0.139424	0.110661	0.971237	163.823	130.027	1141.2	1	685	23	4802
Cluster_YPS128_Repressed_logFC_Genes	Cluster_biopolymer_biosynthetic_process_GO	0.140112	0.0951772	0.955065	164.632	111.833	1122.2	2	364	62	4802
Cluster_YPS163_Repressed_logFC_Genes	Cluster_rRNAprocessing_APGcategory	0.140346	0.110594	0.970248	164.907	129.948	1140.04	1	470	34	4802
Cluster_YJM978_Repressed_logFC_Genes	Cluster_endosome_GO	0.140557	0.0958401	0.955283	165.154	112.612	1122.46	2	467	48	4802
Cluster_Y2209_Repressed_logFC_Genes	Cluster_magnesium_ion_binding_GO	0.140757	0.110508	0.969751	165.389	129.847	1139.46	1	350	46	4802
Cluster_Y7568_Repressed_logFC_Genes	Cluster_chromatin_modification_GO	0.141247	0.110961	0.969715	165.965	130.379	1139.42	1	382	42	4802
Cluster_YPS606_Repressed_logFC_Genes	Cluster_cytoplasm_GO	0.141349	0.0321042	0.890755	166.085	37.7224	1046.64	48	440	607	4802
Cluster_YPS606_Repressed_logFC_Genes	Cluster_protein_transport_GO	0.143076	0.0570956	0.91402	168.114	67.0873	1073.97	11	440	168	4802
Cluster_YJM978_Repressed_logFC_Genes	Cluster_Pu_Protein_complex	0.143295	0.0261249	0.88283	168.372	30.6968	1037.33	86	467	980	4802
Cluster_Y12_Repressed_logFC_Genes	Cluster_ribosome_biogenesis_GO	0.144356	0.057528	0.913172	169.618	67.5954	1072.98	11	450	164	4802
Cluster_YPS606_Repressed_logFC_Genes	Cluster_peptidyl-amino_acid_modification_GO	0.144598	0.113574	0.968975	169.903	133.449	1138.55	1	440	36	4802
Cluster_BY4743_Repressed_logFC_Genes	Cluster_magnesium_ion_binding_GO	0.1447	0.0683456	0.923645	170.023	80.3061	1085.28	8	1210	46	4802
Cluster_NCYC3290_Repressed_logFC_Genes	Cluster_molecular_function_GO	0.145346	0.0387237	0.893378	170.782	45.5003	1049.72	32	685	269	4802
Cluster_YJM1389_Repressed_logFC_Genes	Cluster_tRNA_processing_GO	0.146073	0.115484	0.969412	171.636	135.694	1139.06	1	674	23	4802
Cluster_Y7568_Repressed_logFC_Genes	Cluster_DNA_binding_GO	0.1475	0.0627398	0.91524	173.312	73.7193	1075.41	9	382	164	4802
Cluster_Y7568_Repressed_logFC_Genes	Cluster_autophagy_GO	0.148422	0.0900136	0.941591	174.396	105.766	1106.37	3	382	74	4802
Cluster_Y389_Repressed_logFC_Genes	Cluster_RNA_splicing_GO	0.148956	0.11694	0.967984	175.023	137.405	1137.38	1	503	31	4802
Cluster_Y389_Repressed_logFC_Genes	Cluster_protein_transporter_activity_GO	0.148956	0.11694	0.967984	175.023	137.405	1137.38	1	503	31	4802
Cluster_Y7568_Repressed_logFC_Genes	Cluster_mating_projection_tip_GO	0.150669	0.117742	0.967073	177.036	138.347	1136.31	1	382	41	4802
Cluster_Y7568_Repressed_logFC_Genes	Cluster_nucleoside-triphosphatase_activity_GO	0.150669	0.117742	0.967073	177.036	138.347	1136.31	1	382	41	4802
Cluster_YPS606_Repressed_logFC_Genes	Cluster_membrane_GO	0.151242	0.0394991	0.888257	177.709	46.4114	1043.7	32	440	418	4802
Cluster_YPS128_Repressed_logFC_Genes	Cluster_Golgi_membrane_GO	0.151417	0.118215	0.966798	177.915	138.903	1135.99	1	364	43	4802
Cluster_YJM1273_Repressed_logFC_Genes	Cluster_mitochondrial_outer_membrane_GO	0.152054	0.119049	0.966995	178.663	139.883	1136.22	1	470	33	4802
Cluster_YJM1389_Repressed_logFC_Genes	Cluster_mating_projection_tip_GO	0.152883	0.09371	0.940827	179.638	110.109	1105.47	3	674	41	4802
Cluster_YJM1389_Repressed_logFC_Genes	Cluster_cellular_bud_neck_GO	0.152883	0.09371	0.940827	179.638	110.109	1105.47	3	674	41	4802
Cluster_YPS163_Repressed_logFC_Genes	Cluster_ubiquitin-dependent_protein_catabolic_process_GO	0.152938	0.0851785	0.93224	179.702	100.085	1095.38	4	470	72	4802
Cluster_YJM978_Repressed_logFC_Genes	Cluster_endoplasmic_reticulum_GO	0.153146	0.0649176	0.911771	179.947	76.2782	1071.33	9	467	133	4802
Cluster_YJM1592_Repressed_logFC_Genes	Cluster_manganese_ion_binding_GO	0.153897	0.106777	0.95288	180.829	125.463	1119.63	2	1050	20	4802
Cluster_YJM1592_Repressed_logFC_Genes	Cluster_Repressed_regulation_of_transposition,_RNA-mediated"_GO	0.153897	0.106777	0.95288	180.829	125.463	1119.63	2	1050	20	4802
Cluster_YJM1592_Repressed_logFC_Genes	Cluster_mRNA_transport_GO	0.153897	0.106777	0.95288	180.829	125.463	1119.63	2	1050	20	4802
Cluster_YJM1592_Repressed_logFC_Genes	Cluster_telomere_maintenance_GO	0.153897	0.106777	0.95288	180.829	125.463	1119.63	2	1050	20	4802
Cluster_BY4743_Repressed_logFC_Genes	Cluster_TFs_APGcategory	0.154402	0.123856	0.969454	181.422	145.531	1139.11	1	1210	12	4802
Cluster_BY4743_Repressed_logFC_Genes	Cluster_nucleobase,_nucleoside,_nucleotide_and_nucleic_acid_metabolic_process"_GO	0.154402	0.123856	0.969454	181.422	145.531	1139.11	1	1210	12	4802
Cluster_BY4743_Repressed_logFC_Genes	Cluster_response_to_pheromone_GO	0.154402	0.123856	0.969454	181.422	145.531	1139.11	1	1210	12	4802
Cluster_BY4743_Repressed_logFC_Genes	Cluster_glucose_metabolic_process_GO	0.154402	0.123856	0.969454	181.422	145.531	1139.11	1	1210	12	4802
Cluster_BY4743_Repressed_logFC_Genes	Cluster_chromatin_remodeling_GO	0.154402	0.123856	0.969454	181.422	145.531	1139.11	1	1210	12	4802
Cluster_YJM1592_Repressed_logFC_Genes	Cluster_protein_catabolic_process_GO	0.15504	0.123601	0.968562	182.172	145.231	1138.06	1	1050	14	4802
Cluster_YJM1592_Repressed_logFC_Genes	Cluster_metallopeptidase_activity_GO	0.15504	0.123601	0.968562	182.172	145.231	1138.06	1	1050	14	4802
Cluster_YJM1592_Repressed_logFC_Genes	Cluster_nuclear_chromosome_GO	0.15504	0.123601	0.968562	182.172	145.231	1138.06	1	1050	14	4802
Cluster_YJM1592_Repressed_logFC_Genes	Cluster_reproduction_GO	0.15504	0.123601	0.968562	182.172	145.231	1138.06	1	1050	14	4802
Cluster_YJM1592_Repressed_logFC_Genes	Cluster_soluble_fraction_GO	0.15504	0.123601	0.968562	182.172	145.231	1138.06	1	1050	14	4802
Cluster_YJM1592_Repressed_logFC_Genes	Cluster_peroisomal_membrane_GO	0.15504	0.123601	0.968562	182.172	145.231	1138.06	1	1050	14	4802
Cluster_DBVPG1373_Repressed_logFC_Genes	Cluster_ribosome_GO	0.155356	0.0801281	0.924772	182.543	94.1505	1086.61	5	404	98	4802
Cluster_Y7568_Repressed_logFC_Genes	Cluster_response_to_DNA_damage_stimulus_GO	0.155947	0.093889	0.937942	183.238	110.32	1102.08	3	382	73	4802
Cluster_NCYC3290_Repressed_logFC_Genes	Cluster_acyltransferase_activity_GO	0.1571	0.123526	0.966426	184.593	145.143	1135.55	1	685	22	4802
Cluster_NCYC3290_Repressed_logFC_Genes	Cluster_actin_filament_organization_GO	0.1571	0.123526	0.966426	184.593	145.143	1135.55	1	685	22	4802
Cluster_NCYC3290_Repressed_logFC_Genes	Cluster_NuclearProteinTargetting_APGcategory	0.157373	0.0961179	0.938745	184.913	112.939	1103.03	3	685	40	4802
Cluster_DBVPG1373_Repressed_logFC_Genes	Cluster_cytoskeleton_GO	0.158107	0.12313	0.965023	185.776	144.678	1133.9	1	404	38	4802
Cluster_BY4743_Repressed_logFC_Genes	Cluster_Endocytosis_APGcategory	0.158784	0.110719	0.951934	186.571	130.095	1118.52	2	1210	17	4802
Cluster_BY4743_Repressed_logFC_Genes	Cluster_bipolar_cellular_bud_site_selection_GO	0.158784	0.110719	0.951934	186.571	130.095	1118.52	2	1210	17	4802
Cluster_BY4743_Repressed_logFC_Genes	Cluster_RNA_polymerase_II_transcription_factor_activity_GO	0.158784	0.110719	0.951934	186.571	130.095	1118.52	2	1210	17	4802
Cluster_YJM1592_Repressed_logFC_Genes	Cluster_RNA_splicing_GO	0.160016	0.0917339	0.931718	188.019	107.787	1094.77	4	1050	31	4802
Cluster_NCYC3290_Repressed_logFC_Genes	Cluster_chromosome_GO	0.160326	0.108686	0.94836	188.383	127.706	1114.32	2	685	31	4802
Cluster_NCYC3290_Repressed_logFC_Genes	Cluster_RNA_modification_GO	0.160326	0.108686	0.94836	188.383	127.706	1114.32	2	685	31	4802
Cluster_DBVPG1373_Repressed_logFC_Genes	Cluster_nucleic_acid_binding_GO	0.160331	0.0882903	0.92796	188.389	103.741	1090.35	4	404	83	4802
Cluster_Y7568_Repressed_logFC_Genes	Cluster_intracellular_protein_transport_GO	0.160659	0.12486	0.964201	188.774	146.71	1132.94	1	382	40	4802
Cluster_YJM978_Repressed_logFC_Genes	Cluster_magnesium_ion_binding_GO	0.161075	0.108033	0.946958	189.263	126.939	1112.68	2	467	46	4802
Cluster_YJM1389_Repressed_logFC_Genes	Cluster_proteolysis_GO	0.161795	0.0792353	0.91744	190.109	93.1015	1077.99	6	674	66	4802
Cluster_YJM1273_Repressed_logFC_Genes	Cluster_integral_to_membrane_GO	0.162299	0.0501324	0.887834	190.701	58.9056	1043.2	20	470	256	4802
Cluster_YJM1389_Repressed_logFC_Genes	Cluster_DNA_recombination_GO	0.164174	0.128565	0.964391	192.904	151.064	1133.16	1	674	22	4802
Cluster_YJM1389_Repressed_logFC_Genes	Cluster_actin_filament_organization_GO	0.164174	0.128565	0.964391	192.904	151.064	1133.16	1	674	22	4802
Cluster_YJM1389_Repressed_logFC_Genes	Cluster_nucleotidyltransferase_activity_GO	0.164174	0.128565	0.964391	192.904	151.064	1133.16	1	674	22	4802
Cluster_NCYC3290_Repressed_logFC_Genes	Cluster_rRNA_processing_GO	0.165144	0.0919505	0.926806	194.044	108.042	1089	4	685	48	4802
Cluster_YJM1389_Repressed_logFC_Genes	Cluster_intracellular_protein_transport_GO	0.167128	0.101099	0.93397	196.375	118.791	1097.41	3	674	40	4802
Cluster_YPS606_Repressed_logFC_Genes	Cluster_rRNAprocessing_APGcategory	0.167779	0.130125	0.962346	197.14	152.897	1130.76	1	440	34	4802
Cluster_Y2209_Repressed_logFC_Genes	Cluster_Golgi_membrane_GO	0.167866	0.129825	0.961958	197.243	152.544	1130.3	1	350	43	4802
Cluster_YJM1389_Repressed_logFC_Genes	Cluster_endocytosis_GO	0.168946	0.113716	0.94477	198.512	133.616	1110.1	2	674	31	4802
Cluster_BY4743_Repressed_logFC_Genes	Cluster_chromosome_GO	0.169233	0.0907755	0.921543	198.849	106.661	1082.81	5	1210	31	4802
Cluster_Y12_Repressed_logFC_Genes	Cluster_transcription_factor_activity_GO	0.169456	0.112822	0.943366	199.111	132.566	1108.46	2	450	47	4802
Cluster_BC187_Repressed_logFC_Genes	Cluster_Pu_Protein_complex	0.169586	0.0301793	0.860593	199.264	35.4607	1011.2	81	437	980	4802
Cluster_YPS606_Repressed_logFC_Genes	Cluster_ESR_APGcategory	0.170271	0.0333168	0.863046	200.068	39.1472	1014.08	62	440	758	4802
Cluster_YPS606_Repressed_logFC_Genes	Cluster_endosome_GO	0.170471	0.113357	0.942887	200.303	133.194	1107.89	2	440	48	4802
Cluster_YJM1592_Repressed_logFC_Genes	Cluster_nuclear_pore_GO	0.170818	0.105359	0.934541	200.711	123.797	1098.09	3	1050	25	4802
Cluster_YPS128_Repressed_logFC_Genes	Cluster_cellular_bud_neck_GO	0.171021	0.132094	0.961073	200.95	155.21	1129.26	1	364	41	4802
Cluster_BC187_Repressed_logFC_Genes	Cluster_biopolymer_biosynthetic_process_GO	0.171121	0.10182	0.930699	201.067	119.638	1093.57	3	437	62	4802
Cluster_Y7568_Repressed_logFC_Genes	Cluster_DNA_replication_GO	0.171244	0.132323	0.961079	201.212	155.48	1129.27	1	382	39	4802
Cluster_Y7568_Repressed_logFC_Genes	Cluster_mitochondrial_matri_GO	0.171244	0.132323	0.961079	201.212	155.48	1129.27	1	382	39	4802
Cluster_Y7568_Repressed_logFC_Genes	Cluster_Mitochondria_APGcategory	0.171244	0.132323	0.961079	201.212	155.48	1129.27	1	382	39	4802
Cluster_Y7568_Repressed_logFC_Genes	Cluster_unfolded_protein_binding_GO	0.171244	0.132323	0.961079	201.212	155.48	1129.27	1	382	39	4802
Cluster_YPS128_Repressed_logFC_Genes	Cluster_integral_to_membrane_GO	0.172172	0.0583819	0.88621	202.302	68.5987	1041.3	15	364	256	4802
Cluster_NCYC3290_Repressed_logFC_Genes	Cluster_DNA_replication_GO	0.172231	0.103767	0.931536	202.371	121.926	1094.55	3	685	39	4802
Cluster_DBVPG1373_Repressed_logFC_Genes	Cluster_ribosome_biogenesis_GO	0.173301	0.0685364	0.895236	203.629	80.5303	1051.9	10	404	164	4802
Cluster_DBVPG1373_Repressed_logFC_Genes	Cluster_vacuole_GO	0.174235	0.115338	0.941103	204.726	135.522	1105.8	2	404	52	4802
Cluster_NCYC3290_Repressed_logFC_Genes	Cluster_DNA_repair_GO	0.174236	0.0797673	0.905531	204.727	93.7266	1064	7	685	72	4802
Cluster_Y389_Repressed_logFC_Genes	Cluster_nuclease_activity_GO	0.17663	0.136627	0.959996	207.54	160.537	1128	1	503	29	4802
Cluster_NCYC3290_Repressed_logFC_Genes	Cluster_methyltransferase_activity_GO	0.176785	0.137596	0.960811	207.722	161.675	1128.95	1	685	21	4802
Cluster_NCYC3290_Repressed_logFC_Genes	Cluster_Repressed_regulation_of_transcription_from_RNA_polymerase_II_promoter_GO	0.176785	0.137596	0.960811	207.722	161.675	1128.95	1	685	21	4802
Cluster_YJM1273_Repressed_logFC_Genes	Cluster_RNA_modification_GO	0.178164	0.13755	0.959386	209.343	161.621	1127.28	1	470	31	4802
Cluster_YPS163_Repressed_logFC_Genes	Cluster_chromosome_GO	0.178164	0.13755	0.959386	209.343	161.621	1127.28	1	470	31	4802
Cluster_YPS163_Repressed_logFC_Genes	Cluster_endocytosis_GO	0.178164	0.13755	0.959386	209.343	161.621	1127.28	1	470	31	4802
Cluster_YPS606_Repressed_logFC_Genes	Cluster_biological_process_GO	0.178641	0.0966867	0.918046	209.903	113.607	1078.7	4	440	74	4802
Cluster_BY4743_Repressed_logFC_Genes	Cluster_biopolymer_biosynthetic_process_GO	0.179853	0.0701052	0.890253	211.327	82.3736	1046.05	12	1210	62	4802
Cluster_YJM1389_Repressed_logFC_Genes	Cluster_mitochondrion_GO	0.180194	0.0431298	0.862936	211.728	50.6775	1013.95	36	674	298	4802
Cluster_YPS606_Repressed_logFC_Genes	Cluster_mitochondrial_outer_membrane_GO	0.180584	0.139102	0.958518	212.186	163.445	1126.26	1	440	33	4802
Cluster_Y12_Repressed_logFC_Genes	Cluster_magnesium_ion_binding_GO	0.180689	0.119254	0.938565	212.31	140.123	1102.81	2	450	46	4802
Cluster_YJM1592_Repressed_logFC_Genes	Cluster_GTPase_activator_activity_GO	0.180861	0.123063	0.942202	212.512	144.599	1107.09	2	1050	19	4802
Cluster_YPS128_Repressed_logFC_Genes	Cluster_NuclearProteinTargetting_APGcategory	0.181655	0.139506	0.957851	213.445	163.92	1125.47	1	364	40	4802
Cluster_BC187_Repressed_logFC_Genes	Cluster_ATP_binding_GO	0.182027	0.0644937	0.882467	213.882	75.7801	1036.9	13	437	187	4802
Cluster_Y7568_Repressed_logFC_Genes	Cluster_cytoskeleton_GO	0.182451	0.140138	0.957686	214.38	164.662	1125.28	1	382	38	4802
Cluster_YJM1389_Repressed_logFC_Genes	Cluster_DNA_replication_GO	0.182463	0.108851	0.926388	214.394	127.9	1088.51	3	674	39	4802
Cluster_YJM1389_Repressed_logFC_Genes	Cluster_mitochondrial_matri_GO	0.182463	0.108851	0.926388	214.394	127.9	1088.51	3	674	39	4802
Cluster_YJM1389_Repressed_logFC_Genes	Cluster_methyltransferase_activity_GO	0.184279	0.142826	0.958547	216.528	167.821	1126.29	1	674	21	4802
Cluster_YJM1389_Repressed_logFC_Genes	Cluster_cellular_bud_tip_GO	0.184279	0.142826	0.958547	216.528	167.821	1126.29	1	674	21	4802
Cluster_YJM1389_Repressed_logFC_Genes	Cluster_Repressed_regulation_of_transcription_from_RNA_polymerase_II_promoter_GO	0.184279	0.142826	0.958547	216.528	167.821	1126.29	1	674	21	4802
Cluster_DBVPG1373_Repressed_logFC_Genes	Cluster_nucleolus_GO	0.184486	0.121153	0.936667	216.771	142.355	1100.58	2	404	51	4802
Cluster_YJM1273_Repressed_logFC_Genes	Cluster_regulation_of_transcription,_DNA-dependent"_GO	0.184803	0.0673865	0.882584	217.144	79.1791	1037.04	12	470	162	4802
Cluster_BC187_Repressed_logFC_Genes	Cluster_transcription_factor_activity_GO	0.185237	0.121756	0.936519	217.653	143.063	1100.41	2	437	47	4802
Cluster_BY4743_Repressed_logFC_Genes	Cluster_etracellular_region_GO	0.185592	0.114238	0.928645	218.071	134.23	1091.16	3	1210	21	4802
Cluster_YJM1389_Repressed_logFC_Genes	Cluster_tRNAsynth_APGcategory	0.186382	0.123816	0.937434	218.999	145.484	1101.48	2	674	30	4802
Cluster_YJM1273_Repressed_logFC_Genes	Cluster_ESR_APGcategory	0.187096	0.0344478	0.847351	219.838	40.4762	995.637	67	470	758	4802
Cluster_YJM1592_Repressed_logFC_Genes	Cluster_chromatin_silencing_at_silent_mating-type_cassette_GO	0.187231	0.146964	0.959733	219.996	172.683	1127.69	1	1050	13	4802
Cluster_YJM1592_Repressed_logFC_Genes	Cluster_eonuclease_activity_GO	0.187231	0.146964	0.959733	219.996	172.683	1127.69	1	1050	13	4802
Cluster_YJM1592_Repressed_logFC_Genes	Cluster_tRNA_modification_GO	0.187231	0.146964	0.959733	219.996	172.683	1127.69	1	1050	13	4802
Cluster_YJM1592_Repressed_logFC_Genes	Cluster_cellular_bud_site_selection_GO	0.187231	0.146964	0.959733	219.996	172.683	1127.69	1	1050	13	4802
Cluster_YJM1592_Repressed_logFC_Genes	Cluster_microtubule_GO	0.187231	0.146964	0.959733	219.996	172.683	1127.69	1	1050	13	4802
Cluster_YPS128_Repressed_logFC_Genes	Cluster_ESR_APGcategory	0.187264	0.0385624	0.851299	220.035	45.3108	1000.28	51	364	758	4802
Cluster_Y7568_Repressed_logFC_Genes	Cluster_transferase_activity_GO	0.188139	0.0702851	0.882146	221.063	82.585	1036.52	11	382	185	4802
Cluster_Y2209_Repressed_logFC_Genes	Cluster_mating_projection_tip_GO	0.188466	0.144147	0.955681	221.448	169.373	1122.93	1	350	41	4802
Cluster_Y2209_Repressed_logFC_Genes	Cluster_cellular_bud_neck_GO	0.188466	0.144147	0.955681	221.448	169.373	1122.93	1	350	41	4802
Cluster_Y2209_Repressed_logFC_Genes	Cluster_nucleoside-triphosphatase_activity_GO	0.188466	0.144147	0.955681	221.448	169.373	1122.93	1	350	41	4802
Cluster_YJM1273_Repressed_logFC_Genes	Cluster_binding_GO	0.1898	0.0887819	0.898982	223.015	104.319	1056.3	6	470	92	4802
Cluster_Y12_Repressed_logFC_Genes	Cluster_cytosol_GO	0.19106	0.0891351	0.898075	224.495	104.734	1055.24	6	450	96	4802
Cluster_BY4743_Repressed_logFC_Genes	Cluster_chromatin_assembly_or_disassembly_GO	0.191767	0.130676	0.938909	225.326	153.544	1103.22	2	1210	16	4802
Cluster_Y389_Repressed_logFC_Genes	Cluster_Phospholipid_APGcategory	0.192132	0.147417	0.955285	225.755	173.215	1122.46	1	503	28	4802
Cluster_Y389_Repressed_logFC_Genes	Cluster_energy_reserve_metabolic_process_GO	0.192132	0.147417	0.955285	225.755	173.215	1122.46	1	503	28	4802
Cluster_Y389_Repressed_logFC_Genes	Cluster_tRNAprocessing_APGcategory	0.192132	0.147417	0.955285	225.755	173.215	1122.46	1	503	28	4802
Cluster_BY4743_Repressed_logFC_Genes	Cluster_protein_amino_acid_glycosylation_GO	0.192723	0.151855	0.959133	226.45	178.43	1126.98	1	1210	11	4802
Cluster_BY4743_Repressed_logFC_Genes	Cluster_peripheral_to_membrane_of_membrane_fraction_GO	0.192723	0.151855	0.959133	226.45	178.43	1126.98	1	1210	11	4802
Cluster_BY4743_Repressed_logFC_Genes	Cluster_mitochondrion_inheritance_GO	0.192723	0.151855	0.959133	226.45	178.43	1126.98	1	1210	11	4802
Cluster_BY4743_Repressed_logFC_Genes	Cluster_microsome_GO	0.192723	0.151855	0.959133	226.45	178.43	1126.98	1	1210	11	4802
Cluster_BY4743_Repressed_logFC_Genes	Cluster_chromatin_binding_GO	0.192723	0.151855	0.959133	226.45	178.43	1126.98	1	1210	11	4802
Cluster_BY4743_Repressed_logFC_Genes	Cluster_chromosome,_telomeric_region"_GO	0.192723	0.151855	0.959133	226.45	178.43	1126.98	1	1210	11	4802
Cluster_BY4743_Repressed_logFC_Genes	Cluster_vacuolar_acidification_GO	0.192723	0.151855	0.959133	226.45	178.43	1126.98	1	1210	11	4802
Cluster_BY4743_Repressed_logFC_Genes	Cluster_aminoacyl-tRNA_ligase_activity_GO	0.192723	0.151855	0.959133	226.45	178.43	1126.98	1	1210	11	4802
Cluster_BY4743_Repressed_logFC_Genes	Cluster_cellular_iron_ion_homeostasis_GO	0.192723	0.151855	0.959133	226.45	178.43	1126.98	1	1210	11	4802
Cluster_BY4743_Repressed_logFC_Genes	Cluster_nucleotide-excision_repair_GO	0.192723	0.151855	0.959133	226.45	178.43	1126.98	1	1210	11	4802
Cluster_YPS128_Repressed_logFC_Genes	Cluster_Mitochondria_APGcategory	0.192877	0.14724	0.954363	226.63	173.007	1121.38	1	364	39	4802
Cluster_YJM1273_Repressed_logFC_Genes	Cluster_Golgi_membrane_GO	0.19304	0.126321	0.933282	226.822	148.427	1096.61	2	470	43	4802
Cluster_NCYC3290_Repressed_logFC_Genes	Cluster_RNA_binding_GO	0.193368	0.0731373	0.879769	227.207	85.9363	1033.73	11	685	102	4802
Cluster_DBVPG1373_Repressed_logFC_Genes	Cluster_transcription_GO	0.193422	0.0718193	0.878397	227.271	84.3877	1032.12	11	404	174	4802
Cluster_NCYC3290_Repressed_logFC_Genes	Cluster_vacuolar_membrane_GO	0.194275	0.105046	0.910771	228.273	123.429	1070.16	4	685	46	4802
Cluster_DBVPG1373_Repressed_logFC_Genes	Cluster_hydrolase_activity_GO	0.19467	0.0697896	0.875119	228.737	82.0028	1028.26	12	404	187	4802
Cluster_DBVPG1373_Repressed_logFC_Genes	Cluster_protein_amino_acid_phosphorylation_GO	0.195243	0.127159	0.931916	229.411	149.412	1095	2	404	50	4802
Cluster_YJM978_Repressed_logFC_Genes	Cluster_cytosolic_small_ribosomal_subunit_GO	0.195663	0.149664	0.954001	229.904	175.855	1120.95	1	467	30	4802
Cluster_NCYC3290_Repressed_logFC_Genes	Cluster_GTP_binding_GO	0.195803	0.129241	0.933438	230.069	151.858	1096.79	2	685	29	4802
Cluster_Y7568_Repressed_logFC_Genes	Cluster_ribosome_GO	0.196484	0.0966582	0.900174	230.869	113.573	1057.7	5	382	98	4802
Cluster_Y12_Repressed_logFC_Genes	Cluster_nucleic_acid_binding_GO	0.196582	0.097065	0.900483	230.984	114.051	1058.07	5	450	83	4802
Cluster_YJM1592_Repressed_logFC_Genes	Cluster_mRNA_export_from_nucleus_GO	0.196836	0.118734	0.921898	231.282	139.512	1083.23	3	1050	24	4802
Cluster_YJM1592_Repressed_logFC_Genes	Cluster_nuclear_mRNA_splicing,_via_spliceosome"_GO	0.196836	0.118734	0.921898	231.282	139.512	1083.23	3	1050	24	4802
Cluster_YJM1592_Repressed_logFC_Genes	Cluster_general_RNA_polymerase_II_transcription_factor_activity_GO	0.196836	0.118734	0.921898	231.282	139.512	1083.23	3	1050	24	4802
Cluster_BC187_Repressed_logFC_Genes	Cluster_magnesium_ion_binding_GO	0.196973	0.128311	0.931337	231.443	150.765	1094.32	2	437	46	4802
Cluster_YPS606_Repressed_logFC_Genes	Cluster_ubiquitin-dependent_protein_catabolic_process_GO	0.197599	0.104898	0.907299	232.179	123.255	1066.08	4	440	72	4802
Cluster_Y389_Repressed_logFC_Genes	Cluster_biological_process_GO	0.197836	0.0978644	0.900028	232.457	114.991	1057.53	5	503	74	4802
Cluster_Y389_Repressed_logFC_Genes	Cluster_autophagy_GO	0.197836	0.0978644	0.900028	232.457	114.991	1057.53	5	503	74	4802
Cluster_Y12_Repressed_logFC_Genes	Cluster_RNA_splicing_GO	0.198154	0.151283	0.953129	232.831	177.758	1119.93	1	450	31	4802
Cluster_NCYC3290_Repressed_logFC_Genes	Cluster_incipient_cellular_bud_site_GO	0.198658	0.152917	0.954259	233.423	179.677	1121.25	1	685	20	4802
Cluster_NCYC3290_Repressed_logFC_Genes	Cluster_cytoplasmic_vesicle_GO	0.198658	0.152917	0.954259	233.423	179.677	1121.25	1	685	20	4802
Cluster_NCYC3290_Repressed_logFC_Genes	Cluster_telomere_maintenance_GO	0.198658	0.152917	0.954259	233.423	179.677	1121.25	1	685	20	4802
Cluster_YJM1389_Repressed_logFC_Genes	Cluster_cytoskeleton_GO	0.198935	0.11695	0.918015	233.749	137.416	1078.67	3	674	38	4802
Cluster_Y2209_Repressed_logFC_Genes	Cluster_intracellular_protein_transport_GO	0.199587	0.151753	0.952165	234.515	178.31	1118.79	1	350	40	4802
Cluster_Y12_Repressed_logFC_Genes	Cluster_cell_cycle_GO	0.199764	0.0922676	0.892504	234.723	108.414	1048.69	6	450	95	4802
Cluster_YJM1389_Repressed_logFC_Genes	Cluster_ribonucleoprotein_complex_GO	0.201601	0.0781774	0.876576	236.881	91.8584	1029.98	10	674	95	4802
Cluster_BC187_Repressed_logFC_Genes	Cluster_ubiquitin-dependent_protein_catabolic_process_GO	0.202568	0.10698	0.904412	238.017	125.701	1062.68	4	437	72	4802
Cluster_YPS128_Repressed_logFC_Genes	Cluster_regulation_of_transcription,_DNA-dependent"_GO	0.203788	0.0803975	0.876609	239.451	94.4671	1030.02	9	364	162	4802
Cluster_YJM1592_Repressed_logFC_Genes	Cluster_protein_amino_acid_phosphorylation_GO	0.204102	0.0884819	0.88438	239.82	103.966	1039.15	8	1050	50	4802
Cluster_YPS128_Repressed_logFC_Genes	Cluster_cytoskeleton_GO	0.20471	0.155298	0.950588	240.534	182.475	1116.94	1	364	38	4802
Cluster_Y12_Repressed_logFC_Genes	Cluster_protein_folding_GO	0.205056	0.13284	0.927784	240.941	156.087	1090.15	2	450	44	4802
Cluster_Y12_Repressed_logFC_Genes	Cluster_peptidase_activity_GO	0.205056	0.13284	0.927784	240.941	156.087	1090.15	2	450	44	4802
Cluster_YPS163_Repressed_logFC_Genes	Cluster_nucleotide_binding_GO	0.205967	0.0607985	0.854831	242.011	71.4382	1004.43	19	470	237	4802
Cluster_YJM1389_Repressed_logFC_Genes	Cluster_maturation_of_SSU-rRNA_from_tricistronic_rRNA_transcript_(SSU-rRNA,_5.8S_rRNA,_LSU-rRNA)"_GO	0.206558	0.158303	0.951746	242.706	186.006	1118.3	1	674	20	4802
Cluster_YJM1389_Repressed_logFC_Genes	Cluster_incipient_cellular_bud_site_GO	0.206558	0.158303	0.951746	242.706	186.006	1118.3	1	674	20	4802
Cluster_YJM1389_Repressed_logFC_Genes	Cluster_rRNA_export_from_nucleus_GO	0.206558	0.158303	0.951746	242.706	186.006	1118.3	1	674	20	4802
Cluster_YJM1389_Repressed_logFC_Genes	Cluster_G1/S_transition_of_mitotic_cell_cycle_GO	0.206558	0.158303	0.951746	242.706	186.006	1118.3	1	674	20	4802
Cluster_YJM1389_Repressed_logFC_Genes	Cluster_response_to_osmotic_stress_GO	0.206558	0.158303	0.951746	242.706	186.006	1118.3	1	674	20	4802
Cluster_DBVPG1373_Repressed_logFC_Genes	Cluster_fungal-type_vacuole_GO	0.206709	0.156862	0.950153	242.883	184.313	1116.43	1	404	34	4802
Cluster_Y7568_Repressed_logFC_Genes	Cluster_regulation_of_transcription_from_RNA_polymerase_II_promoter_GO	0.206847	0.156838	0.94999	243.045	184.285	1116.24	1	382	36	4802
Cluster_Y7568_Repressed_logFC_Genes	Cluster_ligase_activity_GO	0.206847	0.156838	0.94999	243.045	184.285	1116.24	1	382	36	4802
Cluster_YJM1592_Repressed_logFC_Genes	Cluster_nuclease_activity_GO	0.207335	0.113573	0.906238	243.619	133.448	1064.83	4	1050	29	4802
Cluster_YJM978_Repressed_logFC_Genes	Cluster_intracellular_GO	0.207687	0.0787682	0.871081	244.032	92.5526	1023.52	10	467	137	4802
Cluster_Y7568_Repressed_logFC_Genes	Cluster_cell_division_GO	0.20805	0.119329	0.911279	244.459	140.212	1070.75	3	382	67	4802
Cluster_Y389_Repressed_logFC_Genes	Cluster_Induced_regulation_of_transcription_from_RNA_polymerase_II_promoter_GO	0.208832	0.158852	0.95002	245.378	186.651	1116.27	1	503	27	4802
Cluster_YPS606_Repressed_logFC_Genes	Cluster_chromosome_GO	0.208841	0.158502	0.949661	245.388	186.24	1115.85	1	440	31	4802
Cluster_YPS606_Repressed_logFC_Genes	Cluster_endocytosis_GO	0.208841	0.158502	0.949661	245.388	186.24	1115.85	1	440	31	4802
Cluster_YPS606_Repressed_logFC_Genes	Cluster_RNA_modification_GO	0.208841	0.158502	0.949661	245.388	186.24	1115.85	1	440	31	4802
Cluster_YPS606_Repressed_logFC_Genes	Cluster_protein_transporter_activity_GO	0.208841	0.158502	0.949661	245.388	186.24	1115.85	1	440	31	4802
Cluster_Y2209_Repressed_logFC_Genes	Cluster_Spellman_G1_peak	0.210669	0.0737433	0.863074	247.536	86.6484	1014.11	12	350	213	4802
Cluster_YPS163_Repressed_logFC_Genes	Cluster_Vacuole_APGcategory	0.211112	0.121321	0.910209	248.057	142.552	1069.5	3	470	54	4802
Cluster_Y2209_Repressed_logFC_Genes	Cluster_Mitochondria_APGcategory	0.211286	0.159657	0.948372	248.261	187.597	1114.34	1	350	39	4802
Cluster_BC187_Repressed_logFC_Genes	Cluster_zinc_ion_binding_GO	0.211307	0.0796272	0.86832	248.286	93.562	1020.28	10	437	146	4802
Cluster_YJM978_Repressed_logFC_Genes	Cluster_nuclease_activity_GO	0.211316	0.160328	0.949012	248.296	188.385	1115.09	1	467	29	4802
Cluster_YPS128_Repressed_logFC_Genes	Cluster_Vacuole_APGcategory	0.211692	0.135903	0.924212	248.738	159.686	1085.95	2	364	54	4802
Cluster_DBVPG1373_Repressed_logFC_Genes	Cluster_structural_constituent_of_ribosome_GO	0.211698	0.110577	0.898879	248.745	129.928	1056.18	4	404	77	4802
Cluster_YJM1592_Repressed_logFC_Genes	Cluster_protein_complex_assembly_GO	0.211748	0.140996	0.929248	248.804	165.67	1091.87	2	1050	18	4802
Cluster_YJM1273_Repressed_logFC_Genes	Cluster_transport_GO	0.21187	0.0584287	0.846558	248.947	68.6537	994.706	22	470	269	4802
Cluster_BC187_Repressed_logFC_Genes	Cluster_chromosome_GO	0.21214	0.160713	0.948572	249.264	188.838	1114.57	1	437	31	4802
Cluster_BC187_Repressed_logFC_Genes	Cluster_protein_transporter_activity_GO	0.21214	0.160713	0.948572	249.264	188.838	1114.57	1	437	31	4802
Cluster_YJM1389_Repressed_logFC_Genes	Cluster_ribosome_biogenesis_GO	0.213043	0.0630638	0.850021	250.326	74.1	998.775	19	674	164	4802
Cluster_Y12_Repressed_logFC_Genes	Cluster_cytosolic_small_ribosomal_subunit_GO	0.213359	0.161609	0.948249	250.697	189.891	1114.19	1	450	30	4802
Cluster_YJM978_Repressed_logFC_Genes	Cluster_Vacuole_APGcategory	0.215441	0.123309	0.907868	253.143	144.888	1066.74	3	467	54	4802
Cluster_NCYC3290_Repressed_logFC_Genes	Cluster_establishment_of_protein_localization_GO	0.215892	0.140416	0.924525	253.673	164.989	1086.32	2	685	28	4802
Cluster_NCYC3290_Repressed_logFC_Genes	Cluster_endosome_membrane_GO	0.215892	0.140416	0.924525	253.673	164.989	1086.32	2	685	28	4802
Cluster_NCYC3290_Repressed_logFC_Genes	Cluster_tRNAprocessing_APGcategory	0.215892	0.140416	0.924525	253.673	164.989	1086.32	2	685	28	4802
Cluster_Y7568_Repressed_logFC_Genes	Cluster_nucleolus_GO	0.21629	0.138485	0.922195	254.141	162.72	1083.58	2	382	51	4802
Cluster_Y389_Repressed_logFC_Genes	Cluster_mRNAprocessing_APGcategory	0.216971	0.0932388	0.876268	254.941	109.556	1029.61	7	503	94	4802
Cluster_DBVPG1373_Repressed_logFC_Genes	Cluster_protein_serine/threonine_kinase_activity_GO	0.218337	0.139723	0.921386	256.546	164.175	1082.63	2	404	48	4802
Cluster_DBVPG1373_Repressed_logFC_Genes	Cluster_protein_kinase_activity_GO	0.218337	0.139723	0.921386	256.546	164.175	1082.63	2	404	48	4802
Cluster_BY4743_Repressed_logFC_Genes	Cluster_protein_ubiquitination_GO	0.218652	0.130977	0.912326	256.916	153.898	1071.98	3	1210	20	4802
Cluster_DBVPG1373_Repressed_logFC_Genes	Cluster_rESR_RPs_APGcategory	0.219628	0.0935131	0.873885	258.063	109.878	1026.81	7	404	117	4802
Cluster_Y389_Repressed_logFC_Genes	Cluster_DNA_repair_GO	0.219757	0.106187	0.88643	258.214	124.77	1041.56	5	503	72	4802
Cluster_DBVPG1373_Repressed_logFC_Genes	Cluster_mitochondrial_outer_membrane_GO	0.220762	0.166301	0.945539	259.395	195.404	1111.01	1	404	33	4802
Cluster_Y7568_Repressed_logFC_Genes	Cluster_cell_cycle_GO	0.221196	0.105944	0.884748	259.905	124.484	1039.58	5	382	95	4802
Cluster_BY4743_Repressed_logFC_Genes	Cluster_carbohydrate_metabolic_process_GO	0.221975	0.100407	0.878432	260.821	117.978	1032.16	7	1210	38	4802
Cluster_YJM978_Repressed_logFC_Genes	Cluster_transport_GO	0.222076	0.060323	0.838247	260.939	70.8795	984.94	22	467	269	4802
Cluster_BC187_Repressed_logFC_Genes	Cluster_protein_folding_GO	0.222315	0.14207	0.919755	261.22	166.932	1080.71	2	437	44	4802
Cluster_YJM1592_Repressed_logFC_Genes	Cluster_peptidase_activity_GO	0.222724	0.0992381	0.876514	261.701	116.605	1029.9	7	1050	44	4802
Cluster_NCYC3290_Repressed_logFC_Genes	Cluster_cytokinesis_GO	0.222899	0.169512	0.946613	261.906	199.177	1112.27	1	685	19	4802
Cluster_NCYC3290_Repressed_logFC_Genes	Cluster_nuclear_membrane_GO	0.222899	0.169512	0.946613	261.906	199.177	1112.27	1	685	19	4802
Cluster_Y2209_Repressed_logFC_Genes	Cluster_cytoskeleton_GO	0.223583	0.167861	0.944278	262.71	197.237	1109.53	1	350	38	4802
Cluster_NCYC3290_Repressed_logFC_Genes	Cluster_peptidyl-amino_acid_modification_GO	0.223872	0.128858	0.904986	263.05	151.408	1063.36	3	685	36	4802
Cluster_YJM978_Repressed_logFC_Genes	Cluster_nucleoside-triphosphatase_activity_GO	0.223887	0.143119	0.919232	263.067	168.165	1080.1	2	467	41	4802
Cluster_YJM1273_Repressed_logFC_Genes	Cluster_endosome_membrane_GO	0.224868	0.16944	0.944572	264.22	199.092	1109.87	1	470	28	4802
Cluster_YJM1592_Repressed_logFC_Genes	Cluster_Tryptophan_APGcategory	0.225271	0.173699	0.948428	264.693	204.096	1114.4	1	1050	12	4802
Cluster_YJM1592_Repressed_logFC_Genes	Cluster_RNA_processing_GO	0.225271	0.173699	0.948428	264.693	204.096	1114.4	1	1050	12	4802
Cluster_YJM1592_Repressed_logFC_Genes	Cluster_endonucleolytic_cleavage_to_generate_mature_5'-end_of_SSU-rRNA_from_(SSU-rRNA,_5.8S_rRNA,_LSU-rRNA)"_GO	0.225271	0.173699	0.948428	264.693	204.096	1114.4	1	1050	12	4802
Cluster_YJM1592_Repressed_logFC_Genes	Cluster_TFs_APGcategory	0.225271	0.173699	0.948428	264.693	204.096	1114.4	1	1050	12	4802
Cluster_YJM1592_Repressed_logFC_Genes	Cluster_nucleobase,_nucleoside,_nucleotide_and_nucleic_acid_metabolic_process"_GO	0.225271	0.173699	0.948428	264.693	204.096	1114.4	1	1050	12	4802
Cluster_YJM1592_Repressed_logFC_Genes	Cluster_chromatin_remodeling_GO	0.225271	0.173699	0.948428	264.693	204.096	1114.4	1	1050	12	4802
Cluster_Y12_Repressed_logFC_Genes	Cluster_PAC_APGcategory	0.225638	0.0516232	0.825986	265.125	60.6573	970.534	33	450	403	4802
Cluster_YJM1389_Repressed_logFC_Genes	Cluster_FattyAcid_APGcategory	0.225833	0.145736	0.919903	265.354	171.24	1080.89	2	674	28	4802
Cluster_YJM1389_Repressed_logFC_Genes	Cluster_energy_reserve_metabolic_process_GO	0.225833	0.145736	0.919903	265.354	171.24	1080.89	2	674	28	4802
Cluster_YJM1389_Repressed_logFC_Genes	Cluster_endosome_membrane_GO	0.225833	0.145736	0.919903	265.354	171.24	1080.89	2	674	28	4802
Cluster_YJM1592_Repressed_logFC_Genes	Cluster_tRNA_processing_GO	0.225982	0.133039	0.907057	265.529	156.321	1065.79	3	1050	23	4802
Cluster_BY4743_Repressed_logFC_Genes	Cluster_metal_ion_binding_GO	0.226148	0.0466484	0.8205	265.724	54.8119	964.087	48	1210	211	4802
Cluster_Y7568_Repressed_logFC_Genes	Cluster_intracellular_GO	0.226385	0.0908604	0.864475	266.002	106.761	1015.76	8	382	137	4802
Cluster_YJM1389_Repressed_logFC_Genes	Cluster_Spellman_M-G1_peak	0.226525	0.0886522	0.862127	266.167	104.166	1013	9	674	85	4802
Cluster_Y389_Repressed_logFC_Genes	Cluster_peroisome_GO	0.226799	0.170936	0.944137	266.489	200.85	1109.36	1	503	26	4802
Cluster_YJM1592_Repressed_logFC_Genes	Cluster_biological_process_GO	0.227074	0.0794682	0.852395	266.812	93.3751	1001.56	13	1050	74	4802
Cluster_YJM1592_Repressed_logFC_Genes	Cluster_protein_binding_GO	0.227507	0.0849944	0.857488	267.321	99.8684	1007.55	11	1050	64	4802
Cluster_YJM1389_Repressed_logFC_Genes	Cluster_Spellman_S_peak	0.227748	0.103507	0.875759	267.604	121.621	1029.02	6	674	61	4802
Cluster_BC187_Repressed_logFC_Genes	Cluster_cytosolic_small_ribosomal_subunit_GO	0.227779	0.171167	0.943388	267.64	201.121	1108.48	1	437	30	4802
Cluster_YJM978_Repressed_logFC_Genes	Cluster_Phospholipid_APGcategory	0.228061	0.171544	0.943483	267.972	201.564	1108.59	1	467	28	4802
Cluster_YJM978_Repressed_logFC_Genes	Cluster_establishment_of_protein_localization_GO	0.228061	0.171544	0.943483	267.972	201.564	1108.59	1	467	28	4802
Cluster_YJM978_Repressed_logFC_Genes	Cluster_energy_reserve_metabolic_process_GO	0.228061	0.171544	0.943483	267.972	201.564	1108.59	1	467	28	4802
Cluster_YJM978_Repressed_logFC_Genes	Cluster_tRNAprocessing_APGcategory	0.228061	0.171544	0.943483	267.972	201.564	1108.59	1	467	28	4802
Cluster_Y12_Repressed_logFC_Genes	Cluster_nuclease_activity_GO	0.229581	0.172444	0.942862	269.758	202.622	1107.86	1	450	29	4802
Cluster_Y12_Repressed_logFC_Genes	Cluster_GTP_binding_GO	0.229581	0.172444	0.942862	269.758	202.622	1107.86	1	450	29	4802
Cluster_Y389_Repressed_logFC_Genes	Cluster_hydrolase_activity_GO	0.22989	0.0704462	0.840557	270.121	82.7743	987.654	16	503	187	4802
Cluster_YPS128_Repressed_logFC_Genes	Cluster_peptidyl-amino_acid_modification_GO	0.230309	0.172386	0.942077	270.613	202.554	1106.94	1	364	36	4802
Cluster_YPS128_Repressed_logFC_Genes	Cluster_regulation_of_transcription_from_RNA_polymerase_II_promoter_GO	0.230309	0.172386	0.942077	270.613	202.554	1106.94	1	364	36	4802
Cluster_BY4743_Repressed_logFC_Genes	Cluster_protein_binding,_bridging"_GO	0.23036	0.152934	0.922574	270.673	179.697	1084.02	2	1210	15	4802
Cluster_BY4743_Repressed_logFC_Genes	Cluster_mitochondrion_organization_GO	0.23036	0.152934	0.922574	270.673	179.697	1084.02	2	1210	15	4802
Cluster_BY4743_Repressed_logFC_Genes	Cluster_cell_wall_GO	0.23036	0.152934	0.922574	270.673	179.697	1084.02	2	1210	15	4802
Cluster_BY4743_Repressed_logFC_Genes	Cluster_nuclear_envelope_GO	0.23036	0.152934	0.922574	270.673	179.697	1084.02	2	1210	15	4802
Cluster_YJM1389_Repressed_logFC_Genes	Cluster_cytokinesis_GO	0.231184	0.175014	0.94383	271.641	205.641	1109	1	674	19	4802
Cluster_YJM1389_Repressed_logFC_Genes	Cluster_lipid_metabolic_process_GO	0.231184	0.175014	0.94383	271.641	205.641	1109	1	674	19	4802
Cluster_YJM1389_Repressed_logFC_Genes	Cluster_GTPase_activator_activity_GO	0.231184	0.175014	0.94383	271.641	205.641	1109	1	674	19	4802
Cluster_Y12_Repressed_logFC_Genes	Cluster_chromatin_modification_GO	0.232101	0.147335	0.915235	272.719	173.119	1075.4	2	450	42	4802
Cluster_Y12_Repressed_logFC_Genes	Cluster_cell_division_GO	0.23401	0.119873	0.885862	274.962	140.851	1040.89	4	450	67	4802
Cluster_Y7568_Repressed_logFC_Genes	Cluster_meiosis_GO	0.234075	0.174973	0.940899	275.038	205.593	1105.56	1	382	34	4802
Cluster_YJM1592_Repressed_logFC_Genes	Cluster_energy_reserve_metabolic_process_GO	0.234806	0.125378	0.890573	275.897	147.319	1046.42	4	1050	28	4802
Cluster_Y2209_Repressed_logFC_Genes	Cluster_Vacuole_APGcategory	0.235012	0.148134	0.913122	276.139	174.057	1072.92	2	350	54	4802
Cluster_Y2209_Repressed_logFC_Genes	Cluster_cytosolic_large_ribosomal_subunit_GO	0.2365	0.17636	0.93986	277.887	207.223	1104.34	1	350	37	4802
Cluster_Y2209_Repressed_logFC_Genes	Cluster_ESR_APGcategory	0.23708	0.045413	0.808333	278.569	53.3603	949.791	50	350	758	4802
Cluster_BY4743_Repressed_logFC_Genes	Cluster_plasma_membrane_GO	0.238444	0.0715924	0.833148	280.172	84.1211	978.949	19	1210	89	4802
Cluster_BY4743_Repressed_logFC_Genes	Cluster_GeneralTFs_APGcategory	0.239123	0.128807	0.889684	280.97	151.348	1045.38	4	1210	24	4802
Cluster_BY4743_Repressed_logFC_Genes	Cluster_protein_refolding_GO	0.239305	0.184632	0.945328	281.183	216.943	1110.76	1	1210	10	4802
Cluster_BY4743_Repressed_logFC_Genes	Cluster_single-stranded_DNA_binding_GO	0.239305	0.184632	0.945328	281.183	216.943	1110.76	1	1210	10	4802
Cluster_BY4743_Repressed_logFC_Genes	Cluster_RNA_elongation_GO	0.239305	0.184632	0.945328	281.183	216.943	1110.76	1	1210	10	4802
Cluster_BY4743_Repressed_logFC_Genes	Cluster_lipid_particle_GO	0.239305	0.184632	0.945328	281.183	216.943	1110.76	1	1210	10	4802
Cluster_BY4743_Repressed_logFC_Genes	Cluster_transcription_initiation_GO	0.239305	0.184632	0.945328	281.183	216.943	1110.76	1	1210	10	4802
Cluster_BY4743_Repressed_logFC_Genes	Cluster_iron-sulfur_cluster_binding_GO	0.239305	0.184632	0.945328	281.183	216.943	1110.76	1	1210	10	4802
Cluster_YJM978_Repressed_logFC_Genes	Cluster_Spellman_S/G2_peak	0.239441	0.100004	0.860563	281.343	117.505	1011.16	7	467	99	4802
Cluster_YJM1389_Repressed_logFC_Genes	Cluster_protein_folding_GO	0.240336	0.124169	0.883834	282.395	145.899	1038.5	4	674	44	4802
Cluster_YPS606_Repressed_logFC_Genes	Cluster_nuclease_activity_GO	0.240922	0.179839	0.938917	283.083	211.311	1103.23	1	440	29	4802
Cluster_Y12_Repressed_logFC_Genes	Cluster_Vacuole_APGcategory	0.241262	0.134825	0.893563	283.483	158.419	1049.94	3	450	54	4802
Cluster_YJM1389_Repressed_logFC_Genes	Cluster_rRNA_metabolic_process_GO	0.241273	0.0970442	0.855771	283.496	114.027	1005.53	8	674	76	4802
Cluster_Y7568_Repressed_logFC_Genes	Cluster_membrane_GO	0.24234	0.056969	0.814629	284.75	66.9386	957.189	29	382	418	4802
Cluster_YJM1273_Repressed_logFC_Genes	Cluster_intracellular_protein_transmembrane_transport_GO	0.242664	0.181184	0.93852	285.13	212.891	1102.76	1	470	27	4802
Cluster_YJM1273_Repressed_logFC_Genes	Cluster_isomerase_activity_GO	0.242664	0.181184	0.93852	285.13	212.891	1102.76	1	470	27	4802
Cluster_YPS163_Repressed_logFC_Genes	Cluster_Proteasome_APGcategory	0.242664	0.181184	0.93852	285.13	212.891	1102.76	1	470	27	4802
Cluster_YPS163_Repressed_logFC_Genes	Cluster_Sterols_APGcategory	0.242664	0.181184	0.93852	285.13	212.891	1102.76	1	470	27	4802
Cluster_YPS163_Repressed_logFC_Genes	Cluster_isomerase_activity_GO	0.242664	0.181184	0.93852	285.13	212.891	1102.76	1	470	27	4802
Cluster_DBVPG1373_Repressed_logFC_Genes	Cluster_vacuolar_membrane_GO	0.243633	0.152973	0.909341	286.269	179.743	1068.48	2	404	46	4802
Cluster_DBVPG1373_Repressed_logFC_Genes	Cluster_molecular_function_GO	0.24389	0.0680034	0.824114	286.571	79.904	968.334	19	404	269	4802
Cluster_BC187_Repressed_logFC_Genes	Cluster_nuclease_activity_GO	0.244413	0.182096	0.937683	287.185	213.963	1101.78	1	437	29	4802
Cluster_YPS163_Repressed_logFC_Genes	Cluster_ATP_binding_GO	0.245839	0.0755198	0.829681	288.861	88.7358	974.875	15	470	187	4802
Cluster_YJM978_Repressed_logFC_Genes	Cluster_Sterols_APGcategory	0.24595	0.183307	0.937357	288.991	215.386	1101.39	1	467	27	4802
Cluster_YJM978_Repressed_logFC_Genes	Cluster_isomerase_activity_GO	0.24595	0.183307	0.937357	288.991	215.386	1101.39	1	467	27	4802
Cluster_Y12_Repressed_logFC_Genes	Cluster_establishment_of_protein_localization_GO	0.246866	0.183782	0.936916	290.068	215.944	1100.88	1	450	28	4802
Cluster_YJM1592_Repressed_logFC_Genes	Cluster_rRNA_processing_GO	0.247331	0.102012	0.854681	290.614	119.864	1004.25	8	1050	48	4802
Cluster_YJM1389_Repressed_logFC_Genes	Cluster_Induced_regulation_of_transcription_from_RNA_polymerase_II_promoter_GO	0.247997	0.157491	0.909494	291.396	185.052	1068.66	2	674	27	4802
Cluster_Y7568_Repressed_logFC_Genes	Cluster_mitochondrial_outer_membrane_GO	0.248821	0.184573	0.935752	292.365	216.873	1099.51	1	382	33	4802
Cluster_NCYC3290_Repressed_logFC_Genes	Cluster_RNA_elongation_from_RNA_polymerase_II_promoter_GO	0.249691	0.187382	0.937691	293.387	220.174	1101.79	1	685	18	4802
Cluster_NCYC3290_Repressed_logFC_Genes	Cluster_protein_complex_assembly_GO	0.249691	0.187382	0.937691	293.387	220.174	1101.79	1	685	18	4802
Cluster_Y12_Repressed_logFC_Genes	Cluster_intracellular_GO	0.249706	0.0896954	0.83999	293.405	105.392	986.988	10	450	137	4802
Cluster_Y2209_Repressed_logFC_Genes	Cluster_regulation_of_transcription_from_RNA_polymerase_II_promoter_GO	0.250058	0.185152	0.935094	293.818	217.554	1098.74	1	350	36	4802
Cluster_YJM1273_Repressed_logFC_Genes	Cluster_Mitochondria_APGcategory	0.250075	0.156797	0.906722	293.838	184.236	1065.4	2	470	39	4802
Cluster_BC187_Repressed_logFC_Genes	Cluster_chromatin_modification_GO	0.250271	0.156626	0.906355	294.068	184.036	1064.97	2	437	42	4802
Cluster_YJM1273_Repressed_logFC_Genes	Cluster_response_to_drug_GO	0.250337	0.138942	0.888605	294.146	163.257	1044.11	3	470	51	4802
Cluster_YPS163_Repressed_logFC_Genes	Cluster_response_to_drug_GO	0.250337	0.138942	0.888605	294.146	163.257	1044.11	3	470	51	4802
Cluster_DBVPG1373_Repressed_logFC_Genes	Cluster_endocytosis_GO	0.251387	0.186383	0.934995	295.38	219	1098.62	1	404	31	4802
Cluster_DBVPG1373_Repressed_logFC_Genes	Cluster_RNA_splicing_GO	0.251387	0.186383	0.934995	295.38	219	1098.62	1	404	31	4802
Cluster_DBVPG1373_Repressed_logFC_Genes	Cluster_RNA_modification_GO	0.251387	0.186383	0.934995	295.38	219	1098.62	1	404	31	4802
Cluster_DBVPG1373_Repressed_logFC_Genes	Cluster_protein_transporter_activity_GO	0.251387	0.186383	0.934995	295.38	219	1098.62	1	404	31	4802
Cluster_YPS128_Repressed_logFC_Genes	Cluster_cytosol_GO	0.253524	0.117204	0.863681	297.891	137.715	1014.83	5	364	96	4802
Cluster_YJM978_Repressed_logFC_Genes	Cluster_DNA_replication_GO	0.254126	0.158833	0.904707	298.598	186.629	1063.03	2	467	39	4802
Cluster_YJM978_Repressed_logFC_Genes	Cluster_unfolded_protein_binding_GO	0.254126	0.158833	0.904707	298.598	186.629	1063.03	2	467	39	4802
Cluster_BC187_Repressed_logFC_Genes	Cluster_binding_GO	0.255007	0.110616	0.855609	299.633	129.974	1005.34	6	437	92	4802
Cluster_YJM1273_Repressed_logFC_Genes	Cluster_biological_process_GO	0.255019	0.118478	0.863459	299.647	139.212	1014.56	5	470	74	4802
Cluster_YPS163_Repressed_logFC_Genes	Cluster_biological_process_GO	0.255019	0.118478	0.863459	299.647	139.212	1014.56	5	470	74	4802
Cluster_BY4743_Repressed_logFC_Genes	Cluster_establishment_of_protein_localization_GO	0.255344	0.125693	0.870349	300.029	147.689	1022.66	5	1210	28	4802
Cluster_BY4743_Repressed_logFC_Genes	Cluster_vacuole_fusion,_non-autophagic"_GO	0.256229	0.148908	0.892679	301.069	174.967	1048.9	3	1210	19	4802
Cluster_BY4743_Repressed_logFC_Genes	Cluster_lipid_metabolic_process_GO	0.256229	0.148908	0.892679	301.069	174.967	1048.9	3	1210	19	4802
Cluster_Y389_Repressed_logFC_Genes	Cluster_ligase_activity_GO	0.256609	0.1604	0.903791	301.516	188.47	1061.95	2	503	36	4802
Cluster_YPS128_Repressed_logFC_Genes	Cluster_ATPase_activity_GO	0.257609	0.159742	0.902133	302.691	187.697	1060.01	2	364	50	4802
Cluster_YJM1389_Repressed_logFC_Genes	Cluster_ER-associated_protein_catabolic_process_GO	0.258327	0.192946	0.934619	303.534	226.712	1098.18	1	674	18	4802
Cluster_YJM1592_Repressed_logFC_Genes	Cluster_actin_filament_organization_GO	0.258429	0.148132	0.889704	303.654	174.055	1045.4	3	1050	22	4802
Cluster_YJM1592_Repressed_logFC_Genes	Cluster_spindle_pole_body_GO	0.258429	0.148132	0.889704	303.654	174.055	1045.4	3	1050	22	4802
Cluster_YPS606_Repressed_logFC_Genes	Cluster_tRNAprocessing_APGcategory	0.258506	0.191222	0.932715	303.745	224.686	1095.94	1	440	28	4802
Cluster_YPS128_Repressed_logFC_Genes	Cluster_membrane_fraction_GO	0.258646	0.190751	0.932106	303.909	224.132	1095.22	1	364	34	4802
Cluster_Y389_Repressed_logFC_Genes	Cluster_response_to_stress_GO	0.259289	0.143069	0.883779	304.665	168.106	1038.44	3	503	47	4802
Cluster_YPS606_Repressed_logFC_Genes	Cluster_mating_projection_tip_GO	0.260888	0.162009	0.901121	306.543	190.361	1058.82	2	440	41	4802
Cluster_NCYC3290_Repressed_logFC_Genes	Cluster_regulation_of_transcription_GO	0.261163	0.164388	0.903225	306.867	193.156	1061.29	2	685	26	4802
Cluster_NCYC3290_Repressed_logFC_Genes	Cluster_peroisome_GO	0.261163	0.164388	0.903225	306.867	193.156	1061.29	2	685	26	4802
Cluster_YPS163_Repressed_logFC_Genes	Cluster_transferase_activity_GO	0.261179	0.0785881	0.817409	306.885	92.341	960.456	15	470	185	4802
Cluster_YJM1273_Repressed_logFC_Genes	Cluster_peroisome_GO	0.261663	0.193472	0.93181	307.454	227.33	1094.88	1	470	26	4802
Cluster_YPS163_Repressed_logFC_Genes	Cluster_regulation_of_transcription_GO	0.261663	0.193472	0.93181	307.454	227.33	1094.88	1	470	26	4802
Cluster_BC187_Repressed_logFC_Genes	Cluster_establishment_of_protein_localization_GO	0.262084	0.193487	0.931403	307.949	227.347	1094.4	1	437	28	4802
Cluster_NCYC3290_Repressed_logFC_Genes	Cluster_sequence-specific_DNA_binding_GO	0.262588	0.122906	0.860318	308.541	144.415	1010.87	5	685	50	4802
Cluster_Y7568_Repressed_logFC_Genes	Cluster_zinc_ion_binding_GO	0.263455	0.0965908	0.833136	309.56	113.494	978.935	9	382	146	4802
Cluster_YJM1273_Repressed_logFC_Genes	Cluster_cytosol_GO	0.263856	0.107167	0.84331	310.031	125.921	990.889	7	470	96	4802
Cluster_YPS163_Repressed_logFC_Genes	Cluster_ATPase_activity_GO	0.264589	0.145021	0.880432	310.892	170.4	1034.51	3	470	50	4802
Cluster_NCYC3290_Repressed_logFC_Genes	Cluster_meiosis_GO	0.264627	0.14706	0.882433	310.937	172.796	1036.86	3	685	34	4802
Cluster_YJM978_Repressed_logFC_Genes	Cluster_peroisome_GO	0.265035	0.195603	0.930568	311.416	229.834	1093.42	1	467	26	4802
Cluster_Y12_Repressed_logFC_Genes	Cluster_isomerase_activity_GO	0.26526	0.195612	0.930352	311.68	229.844	1093.16	1	450	27	4802
Cluster_YJM1273_Repressed_logFC_Genes	Cluster_mitosis_GO	0.26628	0.164961	0.898681	312.879	193.829	1055.95	2	470	38	4802
Cluster_YJM1592_Repressed_logFC_Genes	Cluster_cell_division_GO	0.266586	0.0916518	0.825066	313.239	107.691	969.453	12	1050	67	4802
Cluster_Y389_Repressed_logFC_Genes	Cluster_mRNA_export_from_nucleus_GO	0.266798	0.197014	0.930216	313.488	231.491	1093	1	503	24	4802
Cluster_Y389_Repressed_logFC_Genes	Cluster_nuclear_mRNA_splicing,_via_spliceosome"_GO	0.266798	0.197014	0.930216	313.488	231.491	1093	1	503	24	4802
Cluster_Y389_Repressed_logFC_Genes	Cluster_spliceosome_GO	0.266798	0.197014	0.930216	313.488	231.491	1093	1	503	24	4802
Cluster_NCYC3290_Repressed_logFC_Genes	Cluster_response_to_DNA_damage_stimulus_GO	0.267136	0.104334	0.837198	313.885	122.592	983.708	8	685	73	4802
Cluster_YJM978_Repressed_logFC_Genes	Cluster_sequence-specific_DNA_binding_GO	0.269349	0.146986	0.877637	316.485	172.709	1031.22	3	467	50	4802
Cluster_YJM1592_Repressed_logFC_Genes	Cluster_peripheral_to_membrane_of_membrane_fraction_GO	0.269907	0.20386	0.933953	317.141	239.536	1097.39	1	1050	11	4802
Cluster_YJM1592_Repressed_logFC_Genes	Cluster_phosphoprotein_phosphatase_activity_GO	0.269907	0.20386	0.933953	317.141	239.536	1097.39	1	1050	11	4802
Cluster_YJM1592_Repressed_logFC_Genes	Cluster_vacuolar_acidification_GO	0.269907	0.20386	0.933953	317.141	239.536	1097.39	1	1050	11	4802
Cluster_YJM1592_Repressed_logFC_Genes	Cluster_GPI_anchor_biosynthetic_process_GO	0.269907	0.20386	0.933953	317.141	239.536	1097.39	1	1050	11	4802
Cluster_YJM1592_Repressed_logFC_Genes	Cluster_cellular_iron_ion_homeostasis_GO	0.269907	0.20386	0.933953	317.141	239.536	1097.39	1	1050	11	4802
Cluster_YJM1592_Repressed_logFC_Genes	Cluster_mitochondrial_membrane_GO	0.269907	0.20386	0.933953	317.141	239.536	1097.39	1	1050	11	4802
Cluster_YJM1592_Repressed_logFC_Genes	Cluster_nucleotide-excision_repair_GO	0.269907	0.20386	0.933953	317.141	239.536	1097.39	1	1050	11	4802
Cluster_YJM1592_Repressed_logFC_Genes	Cluster_spindle_GO	0.269907	0.20386	0.933953	317.141	239.536	1097.39	1	1050	11	4802
Cluster_YJM1592_Repressed_logFC_Genes	Cluster_protein_amino_acid_dephosphorylation_GO	0.269907	0.20386	0.933953	317.141	239.536	1097.39	1	1050	11	4802
Cluster_Y2209_Repressed_logFC_Genes	Cluster_nucleolus_GO	0.270148	0.165827	0.895679	317.424	194.847	1052.42	2	350	51	4802
Cluster_YJM978_Repressed_logFC_Genes	Cluster_cytoskeleton_GO	0.270425	0.166986	0.896562	317.749	196.209	1053.46	2	467	38	4802
Cluster_YJM1592_Repressed_logFC_Genes	Cluster_chromatin_modification_GO	0.271254	0.114582	0.843328	318.723	134.634	990.91	7	1050	42	4802
Cluster_YJM1389_Repressed_logFC_Genes	Cluster_regulation_of_transcription_GO	0.271875	0.169702	0.897828	319.453	199.4	1054.95	2	674	26	4802
Cluster_YJM1592_Repressed_logFC_Genes	Cluster_cytosol_GO	0.271903	0.0785084	0.806605	319.486	92.2474	947.761	18	1050	96	4802
Cluster_NCYC3290_Repressed_logFC_Genes	Cluster_endoplasmic_reticulum_GO	0.27299	0.0799443	0.806954	320.763	93.9346	948.171	16	685	133	4802
Cluster_BY4743_Repressed_logFC_Genes	Cluster_protein_catabolic_process_GO	0.275084	0.177267	0.902183	323.224	208.289	1060.07	2	1210	14	4802
Cluster_BY4743_Repressed_logFC_Genes	Cluster_filamentous_growth_GO	0.275084	0.177267	0.902183	323.224	208.289	1060.07	2	1210	14	4802
Cluster_BY4743_Repressed_logFC_Genes	Cluster_nuclear_chromosome_GO	0.275084	0.177267	0.902183	323.224	208.289	1060.07	2	1210	14	4802
Cluster_BY4743_Repressed_logFC_Genes	Cluster_cell_redo_homeostasis_GO	0.275084	0.177267	0.902183	323.224	208.289	1060.07	2	1210	14	4802
Cluster_BY4743_Repressed_logFC_Genes	Cluster_pseudohyphal_growth_GO	0.275353	0.143569	0.868216	323.54	168.694	1020.15	4	1210	23	4802
Cluster_YJM1389_Repressed_logFC_Genes	Cluster_rESR_APGcategory	0.277051	0.0436268	0.766576	325.535	51.2615	900.727	68	674	520	4802
Cluster_YPS606_Repressed_logFC_Genes	Cluster_intracellular_protein_transmembrane_transport_GO	0.277175	0.203061	0.925886	325.681	238.597	1087.92	1	440	27	4802
Cluster_YPS606_Repressed_logFC_Genes	Cluster_isomerase_activity_GO	0.277175	0.203061	0.925886	325.681	238.597	1087.92	1	440	27	4802
Cluster_YJM1389_Repressed_logFC_Genes	Cluster_sequence-specific_DNA_binding_GO	0.277668	0.127862	0.850194	326.26	150.238	998.978	5	674	50	4802
Cluster_DBVPG1373_Repressed_logFC_Genes	Cluster_regulation_of_transcription,_DNA-dependent"_GO	0.277881	0.0924808	0.8146	326.51	108.665	957.155	11	404	162	4802
Cluster_Y12_Repressed_logFC_Genes	Cluster_Mitochondria_APGcategory	0.278018	0.170549	0.892531	326.671	200.395	1048.72	2	450	39	4802
Cluster_YJM1389_Repressed_logFC_Genes	Cluster_cellular_response_to_heat_GO	0.278351	0.138676	0.860324	327.062	162.944	1010.88	4	674	42	4802
Cluster_BC187_Repressed_logFC_Genes	Cluster_transferase_activity_GO	0.278369	0.0840573	0.805688	327.084	98.7673	946.683	14	437	185	4802
Cluster_Y2209_Repressed_logFC_Genes	Cluster_meiosis_GO	0.279179	0.203581	0.924401	328.035	239.208	1086.17	1	350	34	4802
Cluster_NCYC3290_Repressed_logFC_Genes	Cluster_Endocytosis_APGcategory	0.279207	0.206489	0.927281	328.068	242.625	1089.56	1	685	17	4802
Cluster_NCYC3290_Repressed_logFC_Genes	Cluster_bipolar_cellular_bud_site_selection_GO	0.279207	0.206489	0.927281	328.068	242.625	1089.56	1	685	17	4802
Cluster_NCYC3290_Repressed_logFC_Genes	Cluster_transcription_initiation_from_RNA_polymerase_II_promoter_GO	0.279207	0.206489	0.927281	328.068	242.625	1089.56	1	685	17	4802
Cluster_YJM1273_Repressed_logFC_Genes	Cluster_mRNA_processing_GO	0.279442	0.151173	0.871731	328.344	177.628	1024.28	3	470	49	4802
Cluster_Y7568_Repressed_logFC_Genes	Cluster_endocytosis_GO	0.280712	0.204792	0.924081	329.837	240.631	1085.8	1	382	31	4802
Cluster_Y7568_Repressed_logFC_Genes	Cluster_RNA_modification_GO	0.280712	0.204792	0.924081	329.837	240.631	1085.8	1	382	31	4802
Cluster_Y7568_Repressed_logFC_Genes	Cluster_protein_transporter_activity_GO	0.280712	0.204792	0.924081	329.837	240.631	1085.8	1	382	31	4802
Cluster_BC187_Repressed_logFC_Genes	Cluster_fungal-type_vacuole_membrane_GO	0.280832	0.205325	0.924493	329.978	241.257	1086.28	1	437	27	4802
Cluster_YJM1273_Repressed_logFC_Genes	Cluster_transferase_activity,_transferring_glycosyl_groups"_GO	0.281915	0.206284	0.924368	331.25	242.384	1086.13	1	470	25	4802
Cluster_YJM1273_Repressed_logFC_Genes	Cluster_ER_to_Golgi_vesicle-mediated_transport_GO	0.281915	0.206284	0.924368	331.25	242.384	1086.13	1	470	25	4802
Cluster_YPS163_Repressed_logFC_Genes	Cluster_transferase_activity,_transferring_glycosyl_groups"_GO	0.281915	0.206284	0.924368	331.25	242.384	1086.13	1	470	25	4802
Cluster_Y2209_Repressed_logFC_Genes	Cluster_ATPase_activity_GO	0.282738	0.171914	0.889176	332.217	201.999	1044.78	2	350	50	4802
Cluster_Y12_Repressed_logFC_Genes	Cluster_Spellman_G1_peak	0.283668	0.0785225	0.794855	333.31	92.2639	933.955	17	450	213	4802
Cluster_NCYC3290_Repressed_logFC_Genes	Cluster_cellular_bud_neck_GO	0.284706	0.141099	0.856393	334.53	165.791	1006.26	4	685	41	4802
Cluster_NCYC3290_Repressed_logFC_Genes	Cluster_nucleoside-triphosphatase_activity_GO	0.284706	0.141099	0.856393	334.53	165.791	1006.26	4	685	41	4802
Cluster_Y12_Repressed_logFC_Genes	Cluster_90S_preribosome_GO	0.284806	0.207914	0.923107	334.647	244.299	1084.65	1	450	26	4802
Cluster_Y2209_Repressed_logFC_Genes	Cluster_membrane_GO	0.284809	0.0647748	0.779965	334.651	76.1104	916.459	27	350	418	4802
Cluster_YJM978_Repressed_logFC_Genes	Cluster_oidation_reduction_GO	0.285437	0.128431	0.842994	335.388	150.906	990.518	5	467	72	4802
Cluster_DBVPG1373_Repressed_logFC_Genes	Cluster_helicase_activity_GO	0.285587	0.208003	0.922416	335.565	244.404	1083.84	1	404	29	4802
Cluster_YPS606_Repressed_logFC_Genes	Cluster_mitochondrion_GO	0.286068	0.0682671	0.782199	336.13	80.2138	919.084	24	440	298	4802
Cluster_NCYC3290_Repressed_logFC_Genes	Cluster_ER_to_Golgi_vesicle-mediated_transport_GO	0.286479	0.177058	0.890579	336.613	208.043	1046.43	2	685	25	4802
Cluster_YJM1592_Repressed_logFC_Genes	Cluster_specific_RNA_polymerase_II_transcription_factor_activity_GO	0.286595	0.181297	0.894702	336.749	213.024	1051.27	2	1050	16	4802
Cluster_NCYC3290_Repressed_logFC_Genes	Cluster_Spellman_G1_peak	0.286632	0.0659451	0.779313	336.793	77.4855	915.693	27	685	213	4802
Cluster_YJM1592_Repressed_logFC_Genes	Cluster_proteolysis_GO	0.287704	0.0963549	0.808651	338.052	113.217	950.165	12	1050	66	4802
Cluster_Y389_Repressed_logFC_Genes	Cluster_ribosome_GO	0.287867	0.1082	0.820333	338.244	127.135	963.891	8	503	98	4802
Cluster_YJM1389_Repressed_logFC_Genes	Cluster_Endocytosis_APGcategory	0.288151	0.212051	0.9239	338.577	249.16	1085.58	1	674	17	4802
Cluster_YJM1389_Repressed_logFC_Genes	Cluster_transcription_regulator_activity_GO	0.288151	0.212051	0.9239	338.577	249.16	1085.58	1	674	17	4802
Cluster_YJM1389_Repressed_logFC_Genes	Cluster_actin_cortical_patch_GO	0.288151	0.212051	0.9239	338.577	249.16	1085.58	1	674	17	4802
Cluster_Y389_Repressed_logFC_Genes	Cluster_tRNA_processing_GO	0.288959	0.210966	0.922007	339.527	247.885	1083.36	1	503	23	4802
Cluster_BY4743_Repressed_logFC_Genes	Cluster_fungal-type_cell_wall_GO	0.290194	0.138098	0.847904	340.978	162.265	996.287	5	1210	27	4802
Cluster_BY4743_Repressed_logFC_Genes	Cluster_isomerase_activity_GO	0.290194	0.138098	0.847904	340.978	162.265	996.287	5	1210	27	4802
Cluster_BC187_Repressed_logFC_Genes	Cluster_vacuole_GO	0.290356	0.155253	0.864896	341.168	182.422	1016.25	3	437	52	4802
Cluster_YPS128_Repressed_logFC_Genes	Cluster_binding_GO	0.291612	0.129499	0.837888	342.644	152.161	984.518	5	364	92	4802
Cluster_YJM1592_Repressed_logFC_Genes	Cluster_sporulation_resulting_in_formation_of_a_cellular_spore_GO	0.294301	0.163804	0.869504	345.804	192.47	1021.67	3	1050	21	4802
Cluster_YJM1592_Repressed_logFC_Genes	Cluster_cellular_bud_tip_GO	0.294301	0.163804	0.869504	345.804	192.47	1021.67	3	1050	21	4802
Cluster_YJM1592_Repressed_logFC_Genes	Cluster_vacuolar_protein_catabolic_process_GO	0.294645	0.109944	0.8153	346.208	129.184	957.977	9	1050	51	4802
Cluster_Y2209_Repressed_logFC_Genes	Cluster_mitochondrial_outer_membrane_GO	0.294781	0.213195	0.918414	346.368	250.504	1079.14	1	350	33	4802
Cluster_Y12_Repressed_logFC_Genes	Cluster_biological_process_GO	0.294793	0.131196	0.836403	346.382	154.155	982.774	5	450	74	4802
Cluster_Y12_Repressed_logFC_Genes	Cluster_RNAPol_APGcategory	0.294813	0.178598	0.883785	346.405	209.853	1038.45	2	450	38	4802
Cluster_Y12_Repressed_logFC_Genes	Cluster_cytoskeleton_GO	0.294813	0.178598	0.883785	346.405	209.853	1038.45	2	450	38	4802
Cluster_BY4743_Repressed_logFC_Genes	Cluster_chromatin_silencing_at_rDNA_GO	0.295359	0.222223	0.926864	347.047	261.112	1089.07	1	1210	9	4802
Cluster_BY4743_Repressed_logFC_Genes	Cluster_late_endosome_membrane_GO	0.295359	0.222223	0.926864	347.047	261.112	1089.07	1	1210	9	4802
Cluster_BY4743_Repressed_logFC_Genes	Cluster_double-strand_break_repair_GO	0.295359	0.222223	0.926864	347.047	261.112	1089.07	1	1210	9	4802
Cluster_BY4743_Repressed_logFC_Genes	Cluster_U4/U6__U5_tri-snRNP_complex_GO	0.295359	0.222223	0.926864	347.047	261.112	1089.07	1	1210	9	4802
Cluster_BY4743_Repressed_logFC_Genes	Cluster_regulation_of_eit_from_mitosis_GO	0.295359	0.222223	0.926864	347.047	261.112	1089.07	1	1210	9	4802
Cluster_BY4743_Repressed_logFC_Genes	Cluster_tRNA_aminoacylation_for_protein_translation_GO	0.295359	0.222223	0.926864	347.047	261.112	1089.07	1	1210	9	4802
Cluster_BY4743_Repressed_logFC_Genes	Cluster_cytoplasmic_vesicle_membrane_GO	0.295359	0.222223	0.926864	347.047	261.112	1089.07	1	1210	9	4802
Cluster_BY4743_Repressed_logFC_Genes	Cluster_condensed_chromosome_kinetochore_GO	0.295359	0.222223	0.926864	347.047	261.112	1089.07	1	1210	9	4802
Cluster_Y389_Repressed_logFC_Genes	Cluster_membrane_GO	0.295927	0.0562336	0.760307	347.714	66.0745	893.361	40	503	418	4802
Cluster_YPS606_Repressed_logFC_Genes	Cluster_peroisome_GO	0.296968	0.215334	0.918365	348.937	253.017	1079.08	1	440	26	4802
Cluster_YPS606_Repressed_logFC_Genes	Cluster_90S_preribosome_GO	0.296968	0.215334	0.918365	348.937	253.017	1079.08	1	440	26	4802
Cluster_BY4743_Repressed_logFC_Genes	Cluster_cellular_component_GO	0.297135	0.112347	0.815213	349.134	132.008	957.875	9	1210	44	4802
Cluster_BC187_Repressed_logFC_Genes	Cluster_DNA_replication_GO	0.297379	0.179674	0.882296	349.42	211.117	1036.7	2	437	39	4802
Cluster_BC187_Repressed_logFC_Genes	Cluster_unfolded_protein_binding_GO	0.297379	0.179674	0.882296	349.42	211.117	1036.7	2	437	39	4802
Cluster_Y12_Repressed_logFC_Genes	Cluster_sequence-specific_DNA_binding_GO	0.297474	0.158188	0.860714	349.532	185.871	1011.34	3	450	50	4802
Cluster_Y12_Repressed_logFC_Genes	Cluster_ATPase_activity_GO	0.297474	0.158188	0.860714	349.532	185.871	1011.34	3	450	50	4802
Cluster_YJM1389_Repressed_logFC_Genes	Cluster_transferase_activity,_transferring_glycosyl_groups"_GO	0.297518	0.182292	0.884774	349.584	214.193	1039.61	2	674	25	4802
Cluster_YJM1389_Repressed_logFC_Genes	Cluster_signal_transduction_GO	0.299745	0.161497	0.861752	352.2	189.759	1012.56	3	674	33	4802
Cluster_YJM1273_Repressed_logFC_Genes	Cluster_regulation_of_transcription_from_RNA_polymerase_II_promoter_GO	0.301151	0.181782	0.880631	353.852	213.594	1034.74	2	470	36	4802
Cluster_YJM1273_Repressed_logFC_Genes	Cluster_mitochondrion_GO	0.301644	0.0681237	0.76648	354.432	80.0453	900.614	26	470	298	4802
Cluster_YJM1273_Repressed_logFC_Genes	Cluster_general_RNA_polymerase_II_transcription_factor_activity_GO	0.30347	0.219587	0.916117	356.577	258.015	1076.44	1	470	24	4802
Cluster_YJM1273_Repressed_logFC_Genes	Cluster_GeneralTFs_APGcategory	0.30347	0.219587	0.916117	356.577	258.015	1076.44	1	470	24	4802
Cluster_YJM1273_Repressed_logFC_Genes	Cluster_spliceosome_GO	0.30347	0.219587	0.916117	356.577	258.015	1076.44	1	470	24	4802
Cluster_Y12_Repressed_logFC_Genes	Cluster_Spellman_M-G1_peak	0.303514	0.124902	0.821388	356.629	146.76	965.131	6	450	85	4802
Cluster_DBVPG1373_Repressed_logFC_Genes	Cluster_Phospholipid_APGcategory	0.304103	0.219347	0.915244	357.321	257.733	1075.41	1	404	28	4802
Cluster_DBVPG1373_Repressed_logFC_Genes	Cluster_tRNAprocessing_APGcategory	0.304103	0.219347	0.915244	357.321	257.733	1075.41	1	404	28	4802
Cluster_Y12_Repressed_logFC_Genes	Cluster_nuclear_pore_GO	0.305546	0.220657	0.915111	359.017	259.272	1075.26	1	450	25	4802
Cluster_YPS128_Repressed_logFC_Genes	Cluster_chromosome_GO	0.306684	0.220534	0.91385	360.354	259.127	1073.77	1	364	31	4802
Cluster_YJM978_Repressed_logFC_Genes	Cluster_GeneralTFs_APGcategory	0.306988	0.221696	0.914708	360.711	260.493	1074.78	1	467	24	4802
Cluster_YJM978_Repressed_logFC_Genes	Cluster_lipid_biosynthetic_process_GO	0.306988	0.221696	0.914708	360.711	260.493	1074.78	1	467	24	4802
Cluster_Y7568_Repressed_logFC_Genes	Cluster_peptidase_activity_GO	0.308072	0.184073	0.876002	361.985	216.286	1029.3	2	382	44	4802
Cluster_Y7568_Repressed_logFC_Genes	Cluster_cellular_component_GO	0.308072	0.184073	0.876002	361.985	216.286	1029.3	2	382	44	4802
Cluster_Y389_Repressed_logFC_Genes	Cluster_protein_folding_GO	0.308592	0.163056	0.854463	362.596	191.591	1003.99	3	503	44	4802
Cluster_YJM1592_Repressed_logFC_Genes	Cluster_transport_GO	0.310539	0.0521795	0.74164	364.883	61.3109	871.427	55	1050	269	4802
Cluster_Y7568_Repressed_logFC_Genes	Cluster_DNA_repair_GO	0.310818	0.147029	0.836211	365.211	172.759	982.548	4	382	72	4802
Cluster_YPS128_Repressed_logFC_Genes	Cluster_magnesium_ion_binding_GO	0.311086	0.185266	0.87418	365.526	217.688	1027.16	2	364	46	4802
Cluster_NCYC3290_Repressed_logFC_Genes	Cluster_actin_binding_GO	0.311614	0.226748	0.915135	366.146	266.429	1075.28	1	685	16	4802
Cluster_YPS606_Repressed_logFC_Genes	Cluster_nucleotide_binding_GO	0.311967	0.0792183	0.767251	366.561	93.0815	901.52	19	440	237	4802
Cluster_YJM1273_Repressed_logFC_Genes	Cluster_protein_transport_GO	0.312566	0.0903876	0.777822	367.265	106.205	913.941	14	470	168	4802
Cluster_Y389_Repressed_logFC_Genes	Cluster_transcription_from_RNA_polymerase_II_promoter_GO	0.312638	0.225473	0.912835	367.35	264.931	1072.58	1	503	22	4802
Cluster_Y389_Repressed_logFC_Genes	Cluster_acyltransferase_activity_GO	0.312638	0.225473	0.912835	367.35	264.931	1072.58	1	503	22	4802
Cluster_Y389_Repressed_logFC_Genes	Cluster_invasive_growth_in_response_to_glucose_limitation_GO	0.312638	0.225473	0.912835	367.35	264.931	1072.58	1	503	22	4802
Cluster_Y389_Repressed_logFC_Genes	Cluster_nucleotidyltransferase_activity_GO	0.312638	0.225473	0.912835	367.35	264.931	1072.58	1	503	22	4802
Cluster_Y389_Repressed_logFC_Genes	Cluster_mitochondrial_outer_membrane_GO	0.312844	0.187559	0.874716	367.592	220.382	1027.79	2	503	33	4802
Cluster_NCYC3290_Repressed_logFC_Genes	Cluster_general_RNA_polymerase_II_transcription_factor_activity_GO	0.313647	0.190062	0.876415	368.535	223.323	1029.79	2	685	24	4802
Cluster_NCYC3290_Repressed_logFC_Genes	Cluster_lipid_biosynthetic_process_GO	0.313647	0.190062	0.876415	368.535	223.323	1029.79	2	685	24	4802
Cluster_BC187_Repressed_logFC_Genes	Cluster_RNAPol_APGcategory	0.314507	0.187589	0.873082	369.546	220.417	1025.87	2	437	38	4802
Cluster_BC187_Repressed_logFC_Genes	Cluster_cytoskeleton_GO	0.314507	0.187589	0.873082	369.546	220.417	1025.87	2	437	38	4802
Cluster_YPS606_Repressed_logFC_Genes	Cluster_ATPase_activity_GO	0.314927	0.164788	0.849861	370.039	193.626	998.587	3	440	50	4802
Cluster_BY4743_Repressed_logFC_Genes	Cluster_acyltransferase_activity_GO	0.315373	0.158621	0.843248	370.563	186.38	990.816	4	1210	22	4802
Cluster_BY4743_Repressed_logFC_Genes	Cluster_amino_acid_biosynthetic_process_GO	0.315373	0.158621	0.843248	370.563	186.38	990.816	4	1210	22	4802
Cluster_BY4743_Repressed_logFC_Genes	Cluster_invasive_growth_in_response_to_glucose_limitation_GO	0.315373	0.158621	0.843248	370.563	186.38	990.816	4	1210	22	4802
Cluster_Y7568_Repressed_logFC_Genes	Cluster_ion_transport_GO	0.315969	0.226264	0.910295	371.264	265.86	1069.6	1	382	29	4802
Cluster_YJM978_Repressed_logFC_Genes	Cluster_transcription_factor_activity_GO	0.315991	0.165479	0.849488	371.289	194.438	998.148	3	467	47	4802
Cluster_DBVPG1373_Repressed_logFC_Genes	Cluster_mating_projection_tip_GO	0.317133	0.188421	0.871288	372.631	221.395	1023.76	2	404	41	4802
Cluster_DBVPG1373_Repressed_logFC_Genes	Cluster_membrane_GO	0.317207	0.0640604	0.746853	372.718	75.271	877.552	32	404	418	4802
Cluster_YPS606_Repressed_logFC_Genes	Cluster_nuclear_pore_GO	0.317922	0.228005	0.910083	373.558	267.906	1069.35	1	440	25	4802
Cluster_YPS606_Repressed_logFC_Genes	Cluster_ER_to_Golgi_vesicle-mediated_transport_GO	0.317922	0.228005	0.910083	373.558	267.906	1069.35	1	440	25	4802
Cluster_BY4743_Repressed_logFC_Genes	Cluster_unfolded_protein_binding_GO	0.320224	0.123604	0.80338	376.263	145.235	943.971	8	1210	39	4802
Cluster_NCYC3290_Repressed_logFC_Genes	Cluster_transcription_factor_activity_GO	0.320622	0.141388	0.820766	376.731	166.131	964.4	5	685	47	4802
Cluster_YJM1389_Repressed_logFC_Genes	Cluster_actin_binding_GO	0.320807	0.232234	0.911426	376.948	272.875	1070.93	1	674	16	4802
Cluster_YJM1389_Repressed_logFC_Genes	Cluster_vacuolar_transport_GO	0.320807	0.232234	0.911426	376.948	272.875	1070.93	1	674	16	4802
Cluster_YJM1389_Repressed_logFC_Genes	Cluster_endonucleolytic_cleavage_in_ITS1_to_separate_SSU-rRNA_from_5.8S_rRNA_and_LSU-rRNA_from_tricistronic_rRNA_transcript_(SSU-rRNA,_5.8S_rRNA,_LSU-rRNA)"_GO	0.320807	0.232234	0.911426	376.948	272.875	1070.93	1	674	16	4802
Cluster_YJM1389_Repressed_logFC_Genes	Cluster_chromatin_assembly_or_disassembly_GO	0.320807	0.232234	0.911426	376.948	272.875	1070.93	1	674	16	4802
Cluster_YJM1389_Repressed_logFC_Genes	Cluster_specific_RNA_polymerase_II_transcription_factor_activity_GO	0.320807	0.232234	0.911426	376.948	272.875	1070.93	1	674	16	4802
Cluster_YJM1389_Repressed_logFC_Genes	Cluster_cell_morphogenesis_GO	0.320807	0.232234	0.911426	376.948	272.875	1070.93	1	674	16	4802
Cluster_YJM1592_Repressed_logFC_Genes	Cluster_protein_refolding_GO	0.321846	0.237266	0.91542	378.169	278.788	1075.62	1	1050	10	4802
Cluster_YJM1592_Repressed_logFC_Genes	Cluster_DNA-dependent_DNA_replication_GO	0.321846	0.237266	0.91542	378.169	278.788	1075.62	1	1050	10	4802
Cluster_YJM1592_Repressed_logFC_Genes	Cluster_ascospore_wall_assembly_GO	0.321846	0.237266	0.91542	378.169	278.788	1075.62	1	1050	10	4802
Cluster_YJM1592_Repressed_logFC_Genes	Cluster_endonucleolytic_cleavage_in_5'-ETS_of_tricistronic_rRNA_transcript_(SSU-rRNA,_5.8S_rRNA,_LSU-rRNA)"_GO	0.321846	0.237266	0.91542	378.169	278.788	1075.62	1	1050	10	4802
Cluster_YJM1592_Repressed_logFC_Genes	Cluster_iron-sulfur_cluster_binding_GO	0.321846	0.237266	0.91542	378.169	278.788	1075.62	1	1050	10	4802
Cluster_YJM1592_Repressed_logFC_Genes	Cluster_mitotic_cell_cycle_spindle_assembly_checkpoint_GO	0.321846	0.237266	0.91542	378.169	278.788	1075.62	1	1050	10	4802
Cluster_YJM1592_Repressed_logFC_Genes	Cluster_Golgi_to_plasma_membrane_transport_GO	0.321846	0.237266	0.91542	378.169	278.788	1075.62	1	1050	10	4802
Cluster_YJM1592_Repressed_logFC_Genes	Cluster_chromosome,_centromeric_region"_GO	0.321846	0.237266	0.91542	378.169	278.788	1075.62	1	1050	10	4802
Cluster_YJM1592_Repressed_logFC_Genes	Cluster_vesicle_fusion_GO	0.321846	0.237266	0.91542	378.169	278.788	1075.62	1	1050	10	4802
Cluster_YJM1592_Repressed_logFC_Genes	Cluster_mitotic_sister_chromatid_cohesion_GO	0.321846	0.237266	0.91542	378.169	278.788	1075.62	1	1050	10	4802
Cluster_YJM1592_Repressed_logFC_Genes	Cluster_metalloendopeptidase_activity_GO	0.321846	0.237266	0.91542	378.169	278.788	1075.62	1	1050	10	4802
Cluster_YJM1592_Repressed_logFC_Genes	Cluster_protein_serine/threonine_phosphatase_activity_GO	0.321846	0.237266	0.91542	378.169	278.788	1075.62	1	1050	10	4802
Cluster_BC187_Repressed_logFC_Genes	Cluster_biological_process_GO	0.322695	0.139335	0.81664	379.167	163.719	959.552	5	437	74	4802
Cluster_Y7568_Repressed_logFC_Genes	Cluster_Golgi_membrane_GO	0.323319	0.190954	0.867635	379.9	224.371	1019.47	2	382	43	4802
Cluster_DBVPG1373_Repressed_logFC_Genes	Cluster_intracellular_protein_transmembrane_transport_GO	0.3236	0.23101	0.90741	380.23	271.437	1066.21	1	404	27	4802
Cluster_DBVPG1373_Repressed_logFC_Genes	Cluster_fungal-type_vacuole_membrane_GO	0.3236	0.23101	0.90741	380.23	271.437	1066.21	1	404	27	4802
Cluster_DBVPG1373_Repressed_logFC_Genes	Cluster_Sterols_APGcategory	0.3236	0.23101	0.90741	380.23	271.437	1066.21	1	404	27	4802
Cluster_DBVPG1373_Repressed_logFC_Genes	Cluster_isomerase_activity_GO	0.3236	0.23101	0.90741	380.23	271.437	1066.21	1	404	27	4802
Cluster_Y389_Repressed_logFC_Genes	Cluster_protein_binding_GO	0.32545	0.140783	0.815333	382.404	165.42	958.016	5	503	64	4802
Cluster_BY4743_Repressed_logFC_Genes	Cluster_cellular_bud_site_selection_GO	0.32634	0.203199	0.876859	383.45	238.759	1030.31	2	1210	13	4802
Cluster_BY4743_Repressed_logFC_Genes	Cluster_regulation_of_cell_size_GO	0.32634	0.203199	0.876859	383.45	238.759	1030.31	2	1210	13	4802
Cluster_YJM1273_Repressed_logFC_Genes	Cluster_ubiquitin-protein_ligase_activity_GO	0.326369	0.233336	0.906968	383.484	274.17	1065.69	1	470	23	4802
Cluster_DBVPG1373_Repressed_logFC_Genes	Cluster_integral_to_membrane_GO	0.326821	0.0811679	0.754347	384.015	95.3723	886.358	19	404	256	4802
Cluster_Y12_Repressed_logFC_Genes	Cluster_piecemeal_microautophagy_of_nucleus_GO	0.327517	0.233802	0.906284	384.832	274.717	1064.88	1	450	24	4802
Cluster_Y2209_Repressed_logFC_Genes	Cluster_endocytosis_GO	0.328155	0.233138	0.904983	385.582	273.937	1063.36	1	350	31	4802
Cluster_Y2209_Repressed_logFC_Genes	Cluster_endoplasmic_reticulum_membrane_GO	0.328672	0.140213	0.811542	386.19	164.75	953.562	5	350	92	4802
Cluster_YJM978_Repressed_logFC_Genes	Cluster_tRNA_processing_GO	0.329943	0.235414	0.905471	387.683	276.611	1063.93	1	467	23	4802
Cluster_Y12_Repressed_logFC_Genes	Cluster_regulation_of_transcription_from_RNA_polymerase_II_promoter_GO	0.330701	0.194991	0.86429	388.574	229.114	1015.54	2	450	36	4802
Cluster_Y12_Repressed_logFC_Genes	Cluster_ligase_activity_GO	0.330701	0.194991	0.86429	388.574	229.114	1015.54	2	450	36	4802
Cluster_YJM1592_Repressed_logFC_Genes	Cluster_double-strand_break_repair_via_nonhomologous_end_joining_GO	0.331058	0.203098	0.87204	388.993	238.64	1024.65	2	1050	15	4802
Cluster_YJM1592_Repressed_logFC_Genes	Cluster_nuclear_chromatin_GO	0.331058	0.203098	0.87204	388.993	238.64	1024.65	2	1050	15	4802
Cluster_YJM1592_Repressed_logFC_Genes	Cluster_transcription_from_RNA_polymerase_III_promoter_GO	0.331058	0.203098	0.87204	388.993	238.64	1024.65	2	1050	15	4802
Cluster_YJM978_Repressed_logFC_Genes	Cluster_vacuolar_membrane_GO	0.332739	0.171664	0.838925	390.968	201.705	985.737	3	467	46	4802
Cluster_YJM1592_Repressed_logFC_Genes	Cluster_protein_ubiquitination_GO	0.333659	0.179762	0.846103	392.049	211.22	994.171	3	1050	20	4802
Cluster_Y7568_Repressed_logFC_Genes	Cluster_tRNAprocessing_APGcategory	0.334916	0.237409	0.902493	393.526	278.956	1060.43	1	382	28	4802
Cluster_Y7568_Repressed_logFC_Genes	Cluster_molecular_function_GO	0.338494	0.0826455	0.744152	397.73	97.1085	874.379	19	382	269	4802
Cluster_YJM1273_Repressed_logFC_Genes	Cluster_rRNAprocessing_APGcategory	0.339377	0.199031	0.859654	398.768	233.861	1010.09	2	470	34	4802
Cluster_YPS128_Repressed_logFC_Genes	Cluster_nuclease_activity_GO	0.342635	0.241672	0.899036	402.596	283.965	1056.37	1	364	29	4802
Cluster_YPS128_Repressed_logFC_Genes	Cluster_ion_transport_GO	0.342635	0.241672	0.899036	402.596	283.965	1056.37	1	364	29	4802
Cluster_NCYC3290_Repressed_logFC_Genes	Cluster_ubiquitin-protein_ligase_activity_GO	0.342699	0.203275	0.860576	402.671	238.848	1011.18	2	685	23	4802
Cluster_YJM1389_Repressed_logFC_Genes	Cluster_unfolded_protein_binding_GO	0.343067	0.160604	0.817537	403.104	188.71	960.606	4	674	39	4802
Cluster_YJM978_Repressed_logFC_Genes	Cluster_meiosis_GO	0.343813	0.200913	0.857099	403.98	236.073	1007.09	2	467	34	4802
Cluster_YJM978_Repressed_logFC_Genes	Cluster_fungal-type_vacuole_GO	0.343813	0.200913	0.857099	403.98	236.073	1007.09	2	467	34	4802
Cluster_BC187_Repressed_logFC_Genes	Cluster_GeneralTFs_APGcategory	0.343901	0.243212	0.899311	404.084	285.774	1056.69	1	437	24	4802
Cluster_YPS128_Repressed_logFC_Genes	Cluster_transferase_activity_GO	0.344391	0.101304	0.756914	404.659	119.032	889.374	12	364	185	4802
Cluster_Y389_Repressed_logFC_Genes	Cluster_chromatin_modification_GO	0.344966	0.176467	0.831501	405.335	207.349	977.014	3	503	42	4802
Cluster_Y12_Repressed_logFC_Genes	Cluster_response_to_stress_GO	0.345445	0.17599	0.830544	405.898	206.788	975.889	3	450	47	4802
Cluster_BY4743_Repressed_logFC_Genes	Cluster_nucleocytoplasmic_transport_GO	0.345688	0.186903	0.841216	406.183	219.611	988.429	3	1210	17	4802
Cluster_BY4743_Repressed_logFC_Genes	Cluster_transcription_regulator_activity_GO	0.345688	0.186903	0.841216	406.183	219.611	988.429	3	1210	17	4802
Cluster_BY4743_Repressed_logFC_Genes	Cluster_Mating_APGcategory	0.345688	0.186903	0.841216	406.183	219.611	988.429	3	1210	17	4802
Cluster_YPS606_Repressed_logFC_Genes	Cluster_regulation_of_transcription_from_RNA_polymerase_II_promoter_GO	0.346199	0.201601	0.855402	406.784	236.881	1005.1	2	440	36	4802
Cluster_BY4743_Repressed_logFC_Genes	Cluster_fungal-type_vacuole_GO	0.346517	0.137006	0.790488	407.157	160.982	928.823	7	1210	34	4802
Cluster_BY4743_Repressed_logFC_Genes	Cluster_endoplasmic_reticulum_GO	0.34671	0.0724739	0.725764	407.384	85.1568	852.773	31	1210	133	4802
Cluster_NCYC3290_Repressed_logFC_Genes	Cluster_protein_binding,_bridging"_GO	0.347052	0.248015	0.900963	407.786	291.418	1058.63	1	685	15	4802
Cluster_NCYC3290_Repressed_logFC_Genes	Cluster_nuclear_chromatin_GO	0.347052	0.248015	0.900963	407.786	291.418	1058.63	1	685	15	4802
Cluster_NCYC3290_Repressed_logFC_Genes	Cluster_chromatin_silencing_at_telomere_GO	0.347052	0.248015	0.900963	407.786	291.418	1058.63	1	685	15	4802
Cluster_NCYC3290_Repressed_logFC_Genes	Cluster_calcium_ion_binding_GO	0.347052	0.248015	0.900963	407.786	291.418	1058.63	1	685	15	4802
Cluster_NCYC3290_Repressed_logFC_Genes	Cluster_mitotic_sister_chromatid_segregation_GO	0.347052	0.248015	0.900963	407.786	291.418	1058.63	1	685	15	4802
Cluster_YJM1592_Repressed_logFC_Genes	Cluster_binding_GO	0.347523	0.0906907	0.743168	408.34	106.562	873.222	18	1050	92	4802
Cluster_YJM1273_Repressed_logFC_Genes	Cluster_cell_division_GO	0.347601	0.146522	0.798921	408.431	172.163	938.732	5	470	67	4802
Cluster_YJM1389_Repressed_logFC_Genes	Cluster_chromosome_GO	0.349118	0.180171	0.831054	410.214	211.701	976.488	3	674	31	4802
Cluster_YJM1389_Repressed_logFC_Genes	Cluster_RNA_modification_GO	0.349118	0.180171	0.831054	410.214	211.701	976.488	3	674	31	4802
Cluster_YJM1273_Repressed_logFC_Genes	Cluster_DNA_recombination_GO	0.35065	0.247473	0.896823	412.014	290.781	1053.77	1	470	22	4802
Cluster_YJM1273_Repressed_logFC_Genes	Cluster_acyltransferase_activity_GO	0.35065	0.247473	0.896823	412.014	290.781	1053.77	1	470	22	4802
Cluster_YJM1273_Repressed_logFC_Genes	Cluster_response_to_oidative_stress_GO	0.35065	0.247473	0.896823	412.014	290.781	1053.77	1	470	22	4802
Cluster_YPS163_Repressed_logFC_Genes	Cluster_actin_filament_organization_GO	0.35065	0.247473	0.896823	412.014	290.781	1053.77	1	470	22	4802
Cluster_YPS163_Repressed_logFC_Genes	Cluster_response_to_oidative_stress_GO	0.35065	0.247473	0.896823	412.014	290.781	1053.77	1	470	22	4802
Cluster_YPS163_Repressed_logFC_Genes	Cluster_GTPase_activity_GO	0.35065	0.247473	0.896823	412.014	290.781	1053.77	1	470	22	4802
Cluster_YPS163_Repressed_logFC_Genes	Cluster_spindle_pole_body_GO	0.35065	0.247473	0.896823	412.014	290.781	1053.77	1	470	22	4802
Cluster_Y12_Repressed_logFC_Genes	Cluster_ubiquitin-protein_ligase_activity_GO	0.350751	0.247294	0.896543	412.132	290.57	1053.44	1	450	23	4802
Cluster_Y389_Repressed_logFC_Genes	Cluster_endoplasmic_reticulum_GO	0.351818	0.103395	0.751576	413.386	121.489	883.102	12	503	133	4802
Cluster_BC187_Repressed_logFC_Genes	Cluster_endosome_GO	0.352316	0.178217	0.825901	413.971	209.405	970.434	3	437	48	4802
Cluster_BC187_Repressed_logFC_Genes	Cluster_protein_serine/threonine_kinase_activity_GO	0.352316	0.178217	0.825901	413.971	209.405	970.434	3	437	48	4802
Cluster_BC187_Repressed_logFC_Genes	Cluster_protein_kinase_activity_GO	0.352316	0.178217	0.825901	413.971	209.405	970.434	3	437	48	4802
Cluster_YJM978_Repressed_logFC_Genes	Cluster_response_to_oidative_stress_GO	0.354267	0.249502	0.895235	416.264	293.165	1051.9	1	467	22	4802
Cluster_YJM1389_Repressed_logFC_Genes	Cluster_double-strand_break_repair_via_nonhomologous_end_joining_GO	0.356424	0.253335	0.896912	418.798	297.669	1053.87	1	674	15	4802
Cluster_YJM1389_Repressed_logFC_Genes	Cluster_protein_binding,_bridging"_GO	0.356424	0.253335	0.896912	418.798	297.669	1053.87	1	674	15	4802
Cluster_YJM1389_Repressed_logFC_Genes	Cluster_endonuclease_activity_GO	0.356424	0.253335	0.896912	418.798	297.669	1053.87	1	674	15	4802
Cluster_YJM1389_Repressed_logFC_Genes	Cluster_cellular_bud_GO	0.356424	0.253335	0.896912	418.798	297.669	1053.87	1	674	15	4802
Cluster_YJM1389_Repressed_logFC_Genes	Cluster_nuclear_chromatin_GO	0.356424	0.253335	0.896912	418.798	297.669	1053.87	1	674	15	4802
Cluster_YJM1389_Repressed_logFC_Genes	Cluster_chromatin_silencing_at_telomere_GO	0.356424	0.253335	0.896912	418.798	297.669	1053.87	1	674	15	4802
Cluster_YJM1389_Repressed_logFC_Genes	Cluster_regulation_of_cell_cycle_GO	0.356424	0.253335	0.896912	418.798	297.669	1053.87	1	674	15	4802
Cluster_YJM1389_Repressed_logFC_Genes	Cluster_cell_wall_GO	0.356424	0.253335	0.896912	418.798	297.669	1053.87	1	674	15	4802
Cluster_YJM1389_Repressed_logFC_Genes	Cluster_DNA-directed_RNA_polymerase_activity_GO	0.356424	0.253335	0.896912	418.798	297.669	1053.87	1	674	15	4802
Cluster_YJM1389_Repressed_logFC_Genes	Cluster_mitotic_sister_chromatid_segregation_GO	0.356424	0.253335	0.896912	418.798	297.669	1053.87	1	674	15	4802
Cluster_YPS163_Repressed_logFC_Genes	Cluster_transport_GO	0.357794	0.0771261	0.719332	420.408	90.6232	845.215	24	470	269	4802
Cluster_BY4743_Repressed_logFC_Genes	Cluster_lyase_activity_GO	0.359154	0.173562	0.814408	422.006	203.935	956.929	4	1210	21	4802
Cluster_YJM978_Repressed_logFC_Genes	Cluster_membrane_GO	0.361352	0.0635252	0.702173	424.589	74.6421	825.053	38	467	418	4802
Cluster_YPS128_Repressed_logFC_Genes	Cluster_tRNAprocessing_APGcategory	0.361838	0.252541	0.890703	425.16	296.736	1046.58	1	364	28	4802
Cluster_BY4743_Repressed_logFC_Genes	Cluster_endomembrane_system_GO	0.361974	0.264147	0.902173	425.319	310.373	1060.05	1	1210	8	4802
Cluster_BY4743_Repressed_logFC_Genes	Cluster_protein_ubiquitination_during_ubiquitin-dependent_protein_catabolic_process_GO	0.361974	0.264147	0.902173	425.319	310.373	1060.05	1	1210	8	4802
Cluster_BY4743_Repressed_logFC_Genes	Cluster_proteasome_complex_GO	0.361974	0.264147	0.902173	425.319	310.373	1060.05	1	1210	8	4802
Cluster_BY4743_Repressed_logFC_Genes	Cluster_chronological_cell_aging_GO	0.361974	0.264147	0.902173	425.319	310.373	1060.05	1	1210	8	4802
Cluster_BY4743_Repressed_logFC_Genes	Cluster_aial_cellular_bud_site_selection_GO	0.361974	0.264147	0.902173	425.319	310.373	1060.05	1	1210	8	4802
Cluster_BY4743_Repressed_logFC_Genes	Cluster_aminopeptidase_activity_GO	0.361974	0.264147	0.902173	425.319	310.373	1060.05	1	1210	8	4802
Cluster_BY4743_Repressed_logFC_Genes	Cluster_translation_elongation_factor_activity_GO	0.361974	0.264147	0.902173	425.319	310.373	1060.05	1	1210	8	4802
Cluster_BY4743_Repressed_logFC_Genes	Cluster_response_to_temperature_stimulus_GO	0.361974	0.264147	0.902173	425.319	310.373	1060.05	1	1210	8	4802
Cluster_BY4743_Repressed_logFC_Genes	Cluster_nuclear-transcribed_mRNA_catabolic_process,_non-stop_decay"_GO	0.361974	0.264147	0.902173	425.319	310.373	1060.05	1	1210	8	4802
Cluster_BY4743_Repressed_logFC_Genes	Cluster_vacuole_organization_GO	0.361974	0.264147	0.902173	425.319	310.373	1060.05	1	1210	8	4802
Cluster_BY4743_Repressed_logFC_Genes	Cluster_mRNA_catabolic_process_GO	0.361974	0.264147	0.902173	425.319	310.373	1060.05	1	1210	8	4802
Cluster_BY4743_Repressed_logFC_Genes	Cluster_SAGA_complex_GO	0.361974	0.264147	0.902173	425.319	310.373	1060.05	1	1210	8	4802
Cluster_BY4743_Repressed_logFC_Genes	Cluster_Glycogen_APGcategory	0.361974	0.264147	0.902173	425.319	310.373	1060.05	1	1210	8	4802
Cluster_BY4743_Repressed_logFC_Genes	Cluster_SLIK_(SAGA-like)_complex_GO	0.361974	0.264147	0.902173	425.319	310.373	1060.05	1	1210	8	4802
Cluster_Y389_Repressed_logFC_Genes	Cluster_binding_GO	0.362275	0.124646	0.762371	425.673	146.459	895.786	8	503	92	4802
Cluster_YJM1273_Repressed_logFC_Genes	Cluster_protein_folding_GO	0.362813	0.182196	0.819383	426.305	214.08	962.775	3	470	44	4802
Cluster_Y7568_Repressed_logFC_Genes	Cluster_hydrolase_activity_GO	0.363951	0.100935	0.736985	427.642	118.599	865.957	13	382	187	4802
Cluster_YPS163_Repressed_logFC_Genes	Cluster_ESR_APGcategory	0.364101	0.0492314	0.68513	427.819	57.8469	805.028	71	470	758	4802
Cluster_Y2209_Repressed_logFC_Genes	Cluster_ion_transport_GO	0.364521	0.253869	0.889348	428.312	298.296	1044.98	1	350	29	4802
Cluster_Y389_Repressed_logFC_Genes	Cluster_manganese_ion_binding_GO	0.36475	0.255884	0.891135	428.581	300.664	1047.08	1	503	20	4802
Cluster_Y389_Repressed_logFC_Genes	Cluster_protein_ubiquitination_GO	0.36475	0.255884	0.891135	428.581	300.664	1047.08	1	503	20	4802
Cluster_Y389_Repressed_logFC_Genes	Cluster_rRNA_export_from_nucleus_GO	0.36475	0.255884	0.891135	428.581	300.664	1047.08	1	503	20	4802
Cluster_Y389_Repressed_logFC_Genes	Cluster_G1/S_transition_of_mitotic_cell_cycle_GO	0.36475	0.255884	0.891135	428.581	300.664	1047.08	1	503	20	4802
Cluster_Y389_Repressed_logFC_Genes	Cluster_cytoplasmic_vesicle_GO	0.36475	0.255884	0.891135	428.581	300.664	1047.08	1	503	20	4802
Cluster_Y389_Repressed_logFC_Genes	Cluster_mRNA_transport_GO	0.36475	0.255884	0.891135	428.581	300.664	1047.08	1	503	20	4802
Cluster_DBVPG1373_Repressed_logFC_Genes	Cluster_establishment_of_cell_polarity_GO	0.365624	0.255134	0.889509	429.608	299.782	1045.17	1	404	25	4802
Cluster_YJM1389_Repressed_logFC_Genes	Cluster_carbohydrate_metabolic_process_GO	0.366655	0.167719	0.801065	430.82	197.07	941.251	4	674	38	4802
Cluster_YJM1389_Repressed_logFC_Genes	Cluster_RNAPol_APGcategory	0.366655	0.167719	0.801065	430.82	197.07	941.251	4	674	38	4802
Cluster_YJM1389_Repressed_logFC_Genes	Cluster_mitosis_GO	0.366655	0.167719	0.801065	430.82	197.07	941.251	4	674	38	4802
Cluster_BC187_Repressed_logFC_Genes	Cluster_tRNA_processing_GO	0.3673	0.256477	0.889177	431.577	301.36	1044.78	1	437	23	4802
Cluster_BC187_Repressed_logFC_Genes	Cluster_ubiquitin-protein_ligase_activity_GO	0.3673	0.256477	0.889177	431.577	301.36	1044.78	1	437	23	4802
Cluster_YJM1389_Repressed_logFC_Genes	Cluster_ribosome_GO	0.367444	0.107327	0.739882	431.747	126.109	869.361	12	674	98	4802
Cluster_Y389_Repressed_logFC_Genes	Cluster_vacuolar_protein_catabolic_process_GO	0.369379	0.166227	0.796848	434.02	195.317	936.296	4	503	51	4802
Cluster_YJM1592_Repressed_logFC_Genes	Cluster_ascospore_formation_GO	0.371715	0.17488	0.803164	436.765	205.484	943.718	4	1050	24	4802
Cluster_Y7568_Repressed_logFC_Genes	Cluster_NuclearProteinTargetting_APGcategory	0.372354	0.211695	0.839341	437.516	248.742	986.226	2	382	40	4802
Cluster_NCYC3290_Repressed_logFC_Genes	Cluster_vacuole_GO	0.373129	0.144841	0.771712	438.427	170.188	906.762	6	685	52	4802
Cluster_NCYC3290_Repressed_logFC_Genes	Cluster_transcription_from_RNA_polymerase_II_promoter_GO	0.373639	0.216539	0.8429	439.026	254.433	990.408	2	685	22	4802
Cluster_NCYC3290_Repressed_logFC_Genes	Cluster_invasive_growth_in_response_to_glucose_limitation_GO	0.373639	0.216539	0.8429	439.026	254.433	990.408	2	685	22	4802
Cluster_NCYC3290_Repressed_logFC_Genes	Cluster_nucleotidyltransferase_activity_GO	0.373639	0.216539	0.8429	439.026	254.433	990.408	2	685	22	4802
Cluster_NCYC3290_Repressed_logFC_Genes	Cluster_GTPase_activity_GO	0.373639	0.216539	0.8429	439.026	254.433	990.408	2	685	22	4802
Cluster_NCYC3290_Repressed_logFC_Genes	Cluster_spindle_pole_body_GO	0.373639	0.216539	0.8429	439.026	254.433	990.408	2	685	22	4802
Cluster_Y12_Repressed_logFC_Genes	Cluster_DNA_recombination_GO	0.375274	0.261065	0.885791	440.947	306.751	1040.8	1	450	22	4802
Cluster_Y12_Repressed_logFC_Genes	Cluster_invasive_growth_in_response_to_glucose_limitation_GO	0.375274	0.261065	0.885791	440.947	306.751	1040.8	1	450	22	4802
Cluster_Y12_Repressed_logFC_Genes	Cluster_nucleotidyltransferase_activity_GO	0.375274	0.261065	0.885791	440.947	306.751	1040.8	1	450	22	4802
Cluster_Y12_Repressed_logFC_Genes	Cluster_GTPase_activity_GO	0.375274	0.261065	0.885791	440.947	306.751	1040.8	1	450	22	4802
Cluster_Y12_Repressed_logFC_Genes	Cluster_spindle_pole_body_GO	0.375274	0.261065	0.885791	440.947	306.751	1040.8	1	450	22	4802
Cluster_YJM1389_Repressed_logFC_Genes	Cluster_cytosolic_small_ribosomal_subunit_GO	0.375744	0.189362	0.813618	441.499	222.5	956.001	3	674	30	4802
Cluster_YJM1273_Repressed_logFC_Genes	Cluster_Purine_APGcategory	0.376343	0.261917	0.885574	442.203	307.752	1040.55	1	470	21	4802
Cluster_YJM1273_Repressed_logFC_Genes	Cluster_methyltransferase_activity_GO	0.376343	0.261917	0.885574	442.203	307.752	1040.55	1	470	21	4802
Cluster_YPS163_Repressed_logFC_Genes	Cluster_Purine_APGcategory	0.376343	0.261917	0.885574	442.203	307.752	1040.55	1	470	21	4802
Cluster_YPS163_Repressed_logFC_Genes	Cluster_chromosome_segregation_GO	0.376343	0.261917	0.885574	442.203	307.752	1040.55	1	470	21	4802
Cluster_BY4743_Repressed_logFC_Genes	Cluster_nuclease_activity_GO	0.376961	0.153343	0.776382	442.929	180.178	912.249	6	1210	29	4802
Cluster_BY4743_Repressed_logFC_Genes	Cluster_ion_transport_GO	0.376961	0.153343	0.776382	442.929	180.178	912.249	6	1210	29	4802
Cluster_YJM1273_Repressed_logFC_Genes	Cluster_Vacuole_APGcategory	0.379811	0.1687	0.788888	446.278	198.222	926.943	4	470	54	4802
Cluster_YJM978_Repressed_logFC_Genes	Cluster_cellular_bud_tip_GO	0.379987	0.263882	0.883894	446.485	310.061	1038.58	1	467	21	4802
Cluster_YJM1592_Repressed_logFC_Genes	Cluster_hydrolase_activity,_acting_on_acid_anhydrides,_in_phosphorus-containing_anhydrides"_GO	0.380381	0.225341	0.84496	446.948	264.776	992.828	2	1050	14	4802
Cluster_YPS606_Repressed_logFC_Genes	Cluster_magnesium_ion_binding_GO	0.380799	0.187686	0.806886	447.439	220.531	948.091	3	440	46	4802
Cluster_YJM1592_Repressed_logFC_Genes	Cluster_chromatin_silencing_at_rDNA_GO	0.381676	0.273369	0.891694	448.469	321.209	1047.74	1	1050	9	4802
Cluster_YJM1592_Repressed_logFC_Genes	Cluster_phosphatidylinositol_3-phosphate_binding_GO	0.381676	0.273369	0.891694	448.469	321.209	1047.74	1	1050	9	4802
Cluster_YJM1592_Repressed_logFC_Genes	Cluster_condensed_nuclear_chromosome_kinetochore_GO	0.381676	0.273369	0.891694	448.469	321.209	1047.74	1	1050	9	4802
Cluster_YJM1592_Repressed_logFC_Genes	Cluster_Repressed_regulation_of_protein_metabolic_process_GO	0.381676	0.273369	0.891694	448.469	321.209	1047.74	1	1050	9	4802
Cluster_YJM1592_Repressed_logFC_Genes	Cluster_replication_fork_GO	0.381676	0.273369	0.891694	448.469	321.209	1047.74	1	1050	9	4802
Cluster_YJM1592_Repressed_logFC_Genes	Cluster_regulation_of_transcription_during_G1_phase_of_mitotic_cell_cycle_GO	0.381676	0.273369	0.891694	448.469	321.209	1047.74	1	1050	9	4802
Cluster_YJM1592_Repressed_logFC_Genes	Cluster_condensed_chromosome_kinetochore_GO	0.381676	0.273369	0.891694	448.469	321.209	1047.74	1	1050	9	4802
Cluster_YJM1592_Repressed_logFC_Genes	Cluster_ATP-dependent_DNA_helicase_activity_GO	0.381676	0.273369	0.891694	448.469	321.209	1047.74	1	1050	9	4802
Cluster_YPS128_Repressed_logFC_Genes	Cluster_isomerase_activity_GO	0.381874	0.263557	0.881684	448.702	309.679	1035.98	1	364	27	4802
Cluster_Y2209_Repressed_logFC_Genes	Cluster_energy_reserve_metabolic_process_GO	0.383853	0.264447	0.880594	451.027	310.725	1034.7	1	350	28	4802
Cluster_Y2209_Repressed_logFC_Genes	Cluster_tRNAprocessing_APGcategory	0.383853	0.264447	0.880594	451.027	310.725	1034.7	1	350	28	4802
Cluster_Y389_Repressed_logFC_Genes	Cluster_intracellular_protein_transport_GO	0.384102	0.189601	0.805499	451.32	222.781	946.461	3	503	40	4802
Cluster_BY4743_Repressed_logFC_Genes	Cluster_Tryptophan_APGcategory	0.384325	0.229922	0.845598	451.582	270.158	993.578	2	1210	12	4802
Cluster_BY4743_Repressed_logFC_Genes	Cluster_transcription_coactivator_activity_GO	0.384325	0.229922	0.845598	451.582	270.158	993.578	2	1210	12	4802
Cluster_BY4743_Repressed_logFC_Genes	Cluster_retrograde_vesicle-mediated_transport,_Golgi_to_ER"_GO	0.384325	0.229922	0.845598	451.582	270.158	993.578	2	1210	12	4802
Cluster_BY4743_Repressed_logFC_Genes	Cluster_Golgi_to_vacuole_transport_GO	0.384325	0.229922	0.845598	451.582	270.158	993.578	2	1210	12	4802
Cluster_BY4743_Repressed_logFC_Genes	Cluster_one-carbon_compound_metabolic_process_GO	0.384325	0.229922	0.845598	451.582	270.158	993.578	2	1210	12	4802
Cluster_BY4743_Repressed_logFC_Genes	Cluster_DrugResistance_APGcategory	0.384325	0.229922	0.845598	451.582	270.158	993.578	2	1210	12	4802
Cluster_YJM1389_Repressed_logFC_Genes	Cluster_transcription_from_RNA_polymerase_II_promoter_GO	0.385328	0.221154	0.835826	452.76	259.856	982.096	2	674	22	4802
Cluster_YJM1389_Repressed_logFC_Genes	Cluster_acyltransferase_activity_GO	0.385328	0.221154	0.835826	452.76	259.856	982.096	2	674	22	4802
Cluster_NCYC3290_Repressed_logFC_Genes	Cluster_protein_import_into_nucleus_GO	0.385632	0.270061	0.884429	453.118	317.322	1039.2	1	685	14	4802
Cluster_NCYC3290_Repressed_logFC_Genes	Cluster_mitochondrial_translation_GO	0.385632	0.270061	0.884429	453.118	317.322	1039.2	1	685	14	4802
Cluster_NCYC3290_Repressed_logFC_Genes	Cluster_nuclear_chromosome_GO	0.385632	0.270061	0.884429	453.118	317.322	1039.2	1	685	14	4802
Cluster_NCYC3290_Repressed_logFC_Genes	Cluster_reproduction_GO	0.385632	0.270061	0.884429	453.118	317.322	1039.2	1	685	14	4802
Cluster_NCYC3290_Repressed_logFC_Genes	Cluster_peroisomal_membrane_GO	0.385632	0.270061	0.884429	453.118	317.322	1039.2	1	685	14	4802
Cluster_Y2209_Repressed_logFC_Genes	Cluster_hydrolase_activity_GO	0.386083	0.107417	0.721334	453.648	126.215	847.567	12	350	187	4802
Cluster_BY4743_Repressed_logFC_Genes	Cluster_biological_process_GO	0.386224	0.0998927	0.713668	453.813	117.374	838.56	17	1210	74	4802
Cluster_DBVPG1373_Repressed_logFC_Genes	Cluster_cytosolic_large_ribosomal_subunit_GO	0.38693	0.217746	0.830817	454.643	255.852	976.21	2	404	37	4802
Cluster_YPS606_Repressed_logFC_Genes	Cluster_DNA_recombination_GO	0.388036	0.267898	0.879861	455.942	314.78	1033.84	1	440	22	4802
Cluster_YPS606_Repressed_logFC_Genes	Cluster_response_to_oidative_stress_GO	0.388036	0.267898	0.879861	455.942	314.78	1033.84	1	440	22	4802
Cluster_YPS606_Repressed_logFC_Genes	Cluster_protein_complex_GO	0.388036	0.267898	0.879861	455.942	314.78	1033.84	1	440	22	4802
Cluster_YPS606_Repressed_logFC_Genes	Cluster_nucleotidyltransferase_activity_GO	0.388036	0.267898	0.879861	455.942	314.78	1033.84	1	440	22	4802
Cluster_YPS606_Repressed_logFC_Genes	Cluster_GTPase_activity_GO	0.388036	0.267898	0.879861	455.942	314.78	1033.84	1	440	22	4802
Cluster_YPS606_Repressed_logFC_Genes	Cluster_spindle_pole_body_GO	0.388036	0.267898	0.879861	455.942	314.78	1033.84	1	440	22	4802
Cluster_DBVPG1373_Repressed_logFC_Genes	Cluster_nuclear_mRNA_splicing,_via_spliceosome"_GO	0.388186	0.26749	0.879304	456.119	314.301	1033.18	1	404	24	4802
Cluster_DBVPG1373_Repressed_logFC_Genes	Cluster_ascospore_formation_GO	0.388186	0.26749	0.879304	456.119	314.301	1033.18	1	404	24	4802
Cluster_DBVPG1373_Repressed_logFC_Genes	Cluster_lipid_biosynthetic_process_GO	0.388186	0.26749	0.879304	456.119	314.301	1033.18	1	404	24	4802
Cluster_DBVPG1373_Repressed_logFC_Genes	Cluster_spliceosome_GO	0.388186	0.26749	0.879304	456.119	314.301	1033.18	1	404	24	4802
Cluster_Y2209_Repressed_logFC_Genes	Cluster_ubiquitin-dependent_protein_catabolic_process_GO	0.388728	0.169611	0.780883	456.755	199.293	917.538	4	350	72	4802
Cluster_YPS128_Repressed_logFC_Genes	Cluster_mating_projection_tip_GO	0.389025	0.218004	0.828979	457.104	256.155	974.05	2	364	41	4802
Cluster_YJM1389_Repressed_logFC_Genes	Cluster_cell_division_GO	0.389099	0.13151	0.742411	457.191	154.524	872.333	8	674	67	4802
Cluster_BC187_Repressed_logFC_Genes	Cluster_membrane_fraction_GO	0.390276	0.219513	0.829237	458.574	257.928	974.353	2	437	34	4802
Cluster_BC187_Repressed_logFC_Genes	Cluster_meiosis_GO	0.390276	0.219513	0.829237	458.574	257.928	974.353	2	437	34	4802
Cluster_Y12_Repressed_logFC_Genes	Cluster_signal_transduction_GO	0.390318	0.219718	0.8294	458.624	258.169	974.545	2	450	33	4802
Cluster_YPS128_Repressed_logFC_Genes	Cluster_nucleic_acid_binding_GO	0.390598	0.155942	0.765344	458.953	183.232	899.279	5	364	83	4802
Cluster_BC187_Repressed_logFC_Genes	Cluster_transcription_from_RNA_polymerase_II_promoter_GO	0.391923	0.269949	0.878026	460.51	317.19	1031.68	1	437	22	4802
Cluster_BC187_Repressed_logFC_Genes	Cluster_DNA_recombination_GO	0.391923	0.269949	0.878026	460.51	317.19	1031.68	1	437	22	4802
Cluster_BC187_Repressed_logFC_Genes	Cluster_actin_filament_organization_GO	0.391923	0.269949	0.878026	460.51	317.19	1031.68	1	437	22	4802
Cluster_YPS163_Repressed_logFC_Genes	Cluster_kinase_activity_GO	0.392966	0.15771	0.764744	461.735	185.309	898.574	5	470	64	4802
Cluster_Y389_Repressed_logFC_Genes	Cluster_lipid_metabolic_process_GO	0.393255	0.271595	0.87834	462.075	319.124	1032.05	1	503	19	4802
Cluster_Y389_Repressed_logFC_Genes	Cluster_structural_molecule_activity_GO	0.393255	0.271595	0.87834	462.075	319.124	1032.05	1	503	19	4802
Cluster_Y389_Repressed_logFC_Genes	Cluster_nuclear_membrane_GO	0.393255	0.271595	0.87834	462.075	319.124	1032.05	1	503	19	4802
Cluster_Y7568_Repressed_logFC_Genes	Cluster_binding_GO	0.393846	0.145679	0.751833	462.769	171.173	883.404	6	382	92	4802
Cluster_YJM1389_Repressed_logFC_Genes	Cluster_cellular_respiration_GO	0.395094	0.275117	0.880023	464.235	323.262	1034.03	1	674	14	4802
Cluster_YJM1389_Repressed_logFC_Genes	Cluster_metallopeptidase_activity_GO	0.395094	0.275117	0.880023	464.235	323.262	1034.03	1	674	14	4802
Cluster_YJM1389_Repressed_logFC_Genes	Cluster_mitochondrial_translation_GO	0.395094	0.275117	0.880023	464.235	323.262	1034.03	1	674	14	4802
Cluster_YJM1389_Repressed_logFC_Genes	Cluster_pyridoal_phosphate_binding_GO	0.395094	0.275117	0.880023	464.235	323.262	1034.03	1	674	14	4802
Cluster_YJM1389_Repressed_logFC_Genes	Cluster_reproduction_GO	0.395094	0.275117	0.880023	464.235	323.262	1034.03	1	674	14	4802
Cluster_YJM1389_Repressed_logFC_Genes	Cluster_peroisomal_membrane_GO	0.395094	0.275117	0.880023	464.235	323.262	1034.03	1	674	14	4802
Cluster_YJM1592_Repressed_logFC_Genes	Cluster_metal_ion_binding_GO	0.395424	0.0644815	0.669058	464.623	75.7658	786.143	44	1050	211	4802
Cluster_YJM1592_Repressed_logFC_Genes	Cluster_signal_transduction_GO	0.395514	0.155093	0.759579	464.729	182.234	892.505	6	1050	33	4802
Cluster_YJM1389_Repressed_logFC_Genes	Cluster_Spellman_G1_peak	0.397	0.0764865	0.679486	466.475	89.8716	798.396	28	674	213	4802
Cluster_Y7568_Repressed_logFC_Genes	Cluster_transferase_activity,_transferring_glycosyl_groups"_GO	0.39723	0.272017	0.874787	466.745	319.62	1027.87	1	382	25	4802
Cluster_Y7568_Repressed_logFC_Genes	Cluster_establishment_of_cell_polarity_GO	0.39723	0.272017	0.874787	466.745	319.62	1027.87	1	382	25	4802
Cluster_BY4743_Repressed_logFC_Genes	Cluster_response_to_toin_GO	0.397596	0.205829	0.808233	467.175	241.849	949.674	3	1210	16	4802
Cluster_YJM1273_Repressed_logFC_Genes	Cluster_chromatin_modification_GO	0.400335	0.194162	0.793827	470.394	228.14	932.747	3	470	42	4802
Cluster_Y12_Repressed_logFC_Genes	Cluster_sporulation_resulting_in_formation_of_a_cellular_spore_GO	0.401103	0.275027	0.873924	471.296	323.157	1026.86	1	450	21	4802
Cluster_Y12_Repressed_logFC_Genes	Cluster_chromosome_segregation_GO	0.401103	0.275027	0.873924	471.296	323.157	1026.86	1	450	21	4802
Cluster_Y12_Repressed_logFC_Genes	Cluster_Repressed_regulation_of_transcription_from_RNA_polymerase_II_promoter_GO	0.401103	0.275027	0.873924	471.296	323.157	1026.86	1	450	21	4802
Cluster_NCYC3290_Repressed_logFC_Genes	Cluster_ligase_activity_GO	0.401355	0.177483	0.776128	471.592	208.543	911.95	4	685	36	4802
Cluster_YPS128_Repressed_logFC_Genes	Cluster_peroisome_GO	0.40275	0.274672	0.871922	473.231	322.74	1024.51	1	364	26	4802
Cluster_YJM1273_Repressed_logFC_Genes	Cluster_chromosome_GO	0.403045	0.224882	0.821836	473.578	264.236	965.657	2	470	31	4802
Cluster_YJM1273_Repressed_logFC_Genes	Cluster_RNA_splicing_GO	0.403045	0.224882	0.821836	473.578	264.236	965.657	2	470	31	4802
Cluster_YJM1273_Repressed_logFC_Genes	Cluster_maturation_of_SSU-rRNA_from_tricistronic_rRNA_transcript_(SSU-rRNA,_5.8S_rRNA,_LSU-rRNA)"_GO	0.403468	0.27657	0.873102	474.075	324.97	1025.89	1	470	20	4802
Cluster_YJM1273_Repressed_logFC_Genes	Cluster_incipient_cellular_bud_site_GO	0.403468	0.27657	0.873102	474.075	324.97	1025.89	1	470	20	4802
Cluster_YJM1273_Repressed_logFC_Genes	Cluster_protein_ubiquitination_GO	0.403468	0.27657	0.873102	474.075	324.97	1025.89	1	470	20	4802
Cluster_YJM1273_Repressed_logFC_Genes	Cluster_response_to_osmotic_stress_GO	0.403468	0.27657	0.873102	474.075	324.97	1025.89	1	470	20	4802
Cluster_YJM1273_Repressed_logFC_Genes	Cluster_small-subunit_processome_GO	0.403468	0.27657	0.873102	474.075	324.97	1025.89	1	470	20	4802
Cluster_YJM1273_Repressed_logFC_Genes	Cluster_cytoplasmic_vesicle_GO	0.403468	0.27657	0.873102	474.075	324.97	1025.89	1	470	20	4802
Cluster_YJM1273_Repressed_logFC_Genes	Cluster_Pyrimidine_APGcategory	0.403468	0.27657	0.873102	474.075	324.97	1025.89	1	470	20	4802
Cluster_YJM1273_Repressed_logFC_Genes	Cluster_mRNA_transport_GO	0.403468	0.27657	0.873102	474.075	324.97	1025.89	1	470	20	4802
Cluster_YJM1273_Repressed_logFC_Genes	Cluster_telomere_maintenance_GO	0.403468	0.27657	0.873102	474.075	324.97	1025.89	1	470	20	4802
Cluster_YPS163_Repressed_logFC_Genes	Cluster_manganese_ion_binding_GO	0.403468	0.27657	0.873102	474.075	324.97	1025.89	1	470	20	4802
Cluster_YPS163_Repressed_logFC_Genes	Cluster_cytoplasmic_vesicle_GO	0.403468	0.27657	0.873102	474.075	324.97	1025.89	1	470	20	4802
Cluster_YPS163_Repressed_logFC_Genes	Cluster_telomere_maintenance_GO	0.403468	0.27657	0.873102	474.075	324.97	1025.89	1	470	20	4802
Cluster_YJM1592_Repressed_logFC_Genes	Cluster_establishment_of_protein_localization_GO	0.403617	0.168812	0.765194	474.25	198.354	899.103	5	1050	28	4802
Cluster_Y389_Repressed_logFC_Genes	Cluster_mitochondrial_matri_GO	0.404672	0.195951	0.791279	475.49	230.242	929.753	3	503	39	4802
Cluster_Y2209_Repressed_logFC_Genes	Cluster_molecular_function_GO	0.405859	0.0921238	0.686264	476.884	108.245	806.36	18	350	269	4802
Cluster_DBVPG1373_Repressed_logFC_Genes	Cluster_peptidyl-amino_acid_modification_GO	0.405904	0.22495	0.819047	476.937	264.316	962.38	2	404	36	4802
Cluster_NCYC3290_Repressed_logFC_Genes	Cluster_sporulation_resulting_in_formation_of_a_cellular_spore_GO	0.406448	0.229663	0.823215	477.576	269.854	967.278	2	685	21	4802
Cluster_NCYC3290_Repressed_logFC_Genes	Cluster_cellular_bud_tip_GO	0.406448	0.229663	0.823215	477.576	269.854	967.278	2	685	21	4802
Cluster_BY4743_Repressed_logFC_Genes	Cluster_Repressed_regulation_of_transposition,_RNA-mediated"_GO	0.406538	0.187886	0.781348	477.682	220.766	918.084	4	1210	20	4802
Cluster_YJM978_Repressed_logFC_Genes	Cluster_small_GTPase_mediated_signal_transduction_GO	0.407122	0.27845	0.871328	478.368	327.179	1023.81	1	467	20	4802
Cluster_YJM978_Repressed_logFC_Genes	Cluster_response_to_osmotic_stress_GO	0.407122	0.27845	0.871328	478.368	327.179	1023.81	1	467	20	4802
Cluster_YJM978_Repressed_logFC_Genes	Cluster_RNA_modification_GO	0.407582	0.226534	0.818952	478.909	266.177	962.269	2	467	31	4802
Cluster_YJM978_Repressed_logFC_Genes	Cluster_protein_transporter_activity_GO	0.407582	0.226534	0.818952	478.909	266.177	962.269	2	467	31	4802
Cluster_Y7568_Repressed_logFC_Genes	Cluster_mitosis_GO	0.407762	0.22531	0.817549	479.12	264.739	960.62	2	382	38	4802
Cluster_DBVPG1373_Repressed_logFC_Genes	Cluster_Spellman_S_peak	0.407916	0.175116	0.767201	479.301	205.761	901.461	4	404	61	4802
Cluster_Y2209_Repressed_logFC_Genes	Cluster_Spellman_S/G2_peak	0.409638	0.148413	0.738775	481.325	174.385	868.061	6	350	99	4802
Cluster_Y12_Repressed_logFC_Genes	Cluster_catalytic_activity_GO	0.410445	0.115502	0.705056	482.273	135.715	828.441	11	450	132	4802
Cluster_DBVPG1373_Repressed_logFC_Genes	Cluster_ubiquitin-protein_ligase_activity_GO	0.411793	0.279952	0.868159	483.857	328.944	1020.09	1	404	23	4802
Cluster_YPS606_Repressed_logFC_Genes	Cluster_Purine_APGcategory	0.413891	0.281575	0.867684	486.322	330.851	1019.53	1	440	21	4802
Cluster_YPS606_Repressed_logFC_Genes	Cluster_chromosome_segregation_GO	0.413891	0.281575	0.867684	486.322	330.851	1019.53	1	440	21	4802
Cluster_DBVPG1373_Repressed_logFC_Genes	Cluster_response_to_DNA_damage_stimulus_GO	0.413982	0.161476	0.747494	486.429	189.734	878.305	5	404	73	4802
Cluster_Y7568_Repressed_logFC_Genes	Cluster_kinase_activity_GO	0.415596	0.176684	0.761088	488.325	207.604	894.278	4	382	64	4802
Cluster_Y7568_Repressed_logFC_Genes	Cluster_protein_binding_GO	0.415596	0.176684	0.761088	488.325	207.604	894.278	4	382	64	4802
Cluster_DBVPG1373_Repressed_logFC_Genes	Cluster_endosome_GO	0.41619	0.197853	0.781663	489.023	232.477	918.454	3	404	48	4802
Cluster_BC187_Repressed_logFC_Genes	Cluster_Purine_APGcategory	0.41778	0.283536	0.865755	490.892	333.155	1017.26	1	437	21	4802
Cluster_BC187_Repressed_logFC_Genes	Cluster_Repressed_regulation_of_transcription_from_RNA_polymerase_II_promoter_GO	0.41778	0.283536	0.865755	490.892	333.155	1017.26	1	437	21	4802
Cluster_YPS128_Repressed_logFC_Genes	Cluster_cell_division_GO	0.418154	0.177057	0.758903	491.331	208.042	891.711	4	364	67	4802
Cluster_YJM1389_Repressed_logFC_Genes	Cluster_sporulation_resulting_in_formation_of_a_cellular_spore_GO	0.418209	0.23393	0.815721	491.396	274.868	958.472	2	674	21	4802
Cluster_YJM1389_Repressed_logFC_Genes	Cluster_etracellular_region_GO	0.418209	0.23393	0.815721	491.396	274.868	958.472	2	674	21	4802
Cluster_YJM1389_Repressed_logFC_Genes	Cluster_chromosome_segregation_GO	0.418209	0.23393	0.815721	491.396	274.868	958.472	2	674	21	4802
Cluster_NCYC3290_Repressed_logFC_Genes	Cluster_FattyAcid_APGcategory	0.419013	0.203121	0.784108	492.34	238.667	921.327	3	685	28	4802
Cluster_NCYC3290_Repressed_logFC_Genes	Cluster_Phospholipid_APGcategory	0.419013	0.203121	0.784108	492.34	238.667	921.327	3	685	28	4802
Cluster_Y389_Repressed_logFC_Genes	Cluster_SGDessentials_APGcategory	0.419816	0.0473471	0.627531	493.284	55.6328	737.349	89	503	871	4802
Cluster_Y7568_Repressed_logFC_Genes	Cluster_ascospore_formation_GO	0.419857	0.283763	0.863906	493.332	333.422	1015.09	1	382	24	4802
Cluster_Y7568_Repressed_logFC_Genes	Cluster_lipid_biosynthetic_process_GO	0.419857	0.283763	0.863906	493.332	333.422	1015.09	1	382	24	4802
Cluster_Y7568_Repressed_logFC_Genes	Cluster_piecemeal_microautophagy_of_nucleus_GO	0.419857	0.283763	0.863906	493.332	333.422	1015.09	1	382	24	4802
Cluster_YJM1273_Repressed_logFC_Genes	Cluster_iron_ion_binding_GO	0.419943	0.199901	0.779958	493.433	234.884	916.451	3	470	41	4802
Cluster_YPS163_Repressed_logFC_Genes	Cluster_mating_projection_tip_GO	0.419943	0.199901	0.779958	493.433	234.884	916.451	3	470	41	4802
Cluster_YPS163_Repressed_logFC_Genes	Cluster_nucleoside-triphosphatase_activity_GO	0.419943	0.199901	0.779958	493.433	234.884	916.451	3	470	41	4802
Cluster_YJM1592_Repressed_logFC_Genes	Cluster_nucleotide_binding_GO	0.420759	0.0622206	0.641462	494.392	73.1092	753.718	50	1050	237	4802
Cluster_YJM1592_Repressed_logFC_Genes	Cluster_RNA_splicing_factor_activity,_transesterification_mechanism"_GO	0.422633	0.210884	0.788252	496.594	247.789	926.196	3	1050	18	4802
Cluster_Y389_Repressed_logFC_Genes	Cluster_translational_initiation_GO	0.42342	0.287466	0.864046	497.519	337.773	1015.25	1	503	18	4802
Cluster_Y389_Repressed_logFC_Genes	Cluster_electron_carrier_activity_GO	0.42342	0.287466	0.864046	497.519	337.773	1015.25	1	503	18	4802
Cluster_Y389_Repressed_logFC_Genes	Cluster_ER-associated_protein_catabolic_process_GO	0.42342	0.287466	0.864046	497.519	337.773	1015.25	1	503	18	4802
Cluster_Y389_Repressed_logFC_Genes	Cluster_protein_complex_assembly_GO	0.42342	0.287466	0.864046	497.519	337.773	1015.25	1	503	18	4802
Cluster_YPS128_Repressed_logFC_Genes	Cluster_ER_to_Golgi_vesicle-mediated_transport_GO	0.42447	0.285828	0.861358	498.752	335.848	1012.1	1	364	25	4802
Cluster_Y389_Repressed_logFC_Genes	Cluster_endosome_GO	0.424774	0.180528	0.755755	499.109	212.12	888.012	4	503	48	4802
Cluster_Y2209_Repressed_logFC_Genes	Cluster_peroisome_GO	0.424845	0.285805	0.86096	499.193	335.821	1011.63	1	350	26	4802
Cluster_BC187_Repressed_logFC_Genes	Cluster_transport_GO	0.425341	0.0844579	0.659117	499.776	99.238	774.462	23	437	269	4802
Cluster_Y389_Repressed_logFC_Genes	Cluster_FattyAcid_APGcategory	0.425935	0.233804	0.807868	500.474	274.72	949.245	2	503	28	4802
Cluster_Y7568_Repressed_logFC_Genes	Cluster_cytosolic_large_ribosomal_subunit_GO	0.426259	0.231949	0.80569	500.854	272.54	946.686	2	382	37	4802
Cluster_NCYC3290_Repressed_logFC_Genes	Cluster_tRNA_modification_GO	0.427417	0.292555	0.865139	502.215	343.752	1016.54	1	685	13	4802
Cluster_NCYC3290_Repressed_logFC_Genes	Cluster_cytoskeleton_organization_GO	0.427417	0.292555	0.865139	502.215	343.752	1016.54	1	685	13	4802
Cluster_NCYC3290_Repressed_logFC_Genes	Cluster_cellular_bud_site_selection_GO	0.427417	0.292555	0.865139	502.215	343.752	1016.54	1	685	13	4802
Cluster_NCYC3290_Repressed_logFC_Genes	Cluster_ATP-dependent_helicase_activity_GO	0.427417	0.292555	0.865139	502.215	343.752	1016.54	1	685	13	4802
Cluster_NCYC3290_Repressed_logFC_Genes	Cluster_microtubule_GO	0.427417	0.292555	0.865139	502.215	343.752	1016.54	1	685	13	4802
Cluster_NCYC3290_Repressed_logFC_Genes	Cluster_tRNA_metabolic_process_GO	0.427417	0.292555	0.865139	502.215	343.752	1016.54	1	685	13	4802
Cluster_NCYC3290_Repressed_logFC_Genes	Cluster_protein_export_from_nucleus_GO	0.427417	0.292555	0.865139	502.215	343.752	1016.54	1	685	13	4802
Cluster_Y12_Repressed_logFC_Genes	Cluster_maturation_of_SSU-rRNA_from_tricistronic_rRNA_transcript_(SSU-rRNA,_5.8S_rRNA,_LSU-rRNA)"_GO	0.428245	0.289072	0.860828	503.188	339.66	1011.47	1	450	20	4802
Cluster_Y12_Repressed_logFC_Genes	Cluster_protein_ubiquitination_GO	0.428245	0.289072	0.860828	503.188	339.66	1011.47	1	450	20	4802
Cluster_Y12_Repressed_logFC_Genes	Cluster_small-subunit_processome_GO	0.428245	0.289072	0.860828	503.188	339.66	1011.47	1	450	20	4802
Cluster_Y12_Repressed_logFC_Genes	Cluster_cytoplasmic_vesicle_GO	0.428245	0.289072	0.860828	503.188	339.66	1011.47	1	450	20	4802
Cluster_Y12_Repressed_logFC_Genes	Cluster_rESR_APGcategory	0.428755	0.0619502	0.633195	503.787	72.7915	744.004	47	450	520	4802
Cluster_Y7568_Repressed_logFC_Genes	Cluster_protein_amino_acid_phosphorylation_GO	0.428926	0.201071	0.772145	503.988	236.258	907.27	3	382	50	4802
Cluster_Y7568_Repressed_logFC_Genes	Cluster_ATPase_activity_GO	0.428926	0.201071	0.772145	503.988	236.258	907.27	3	382	50	4802
Cluster_YJM978_Repressed_logFC_Genes	Cluster_biopolymer_biosynthetic_process_GO	0.431453	0.165805	0.734352	506.957	194.821	862.864	5	467	62	4802
Cluster_YJM1273_Repressed_logFC_Genes	Cluster_lipid_metabolic_process_GO	0.432032	0.291305	0.859273	507.638	342.283	1009.65	1	470	19	4802
Cluster_YJM1273_Repressed_logFC_Genes	Cluster_structural_molecule_activity_GO	0.432032	0.291305	0.859273	507.638	342.283	1009.65	1	470	19	4802
Cluster_YJM1273_Repressed_logFC_Genes	Cluster_GTPase_activator_activity_GO	0.432032	0.291305	0.859273	507.638	342.283	1009.65	1	470	19	4802
Cluster_YPS163_Repressed_logFC_Genes	Cluster_cytokinesis_GO	0.432032	0.291305	0.859273	507.638	342.283	1009.65	1	470	19	4802
Cluster_YPS163_Repressed_logFC_Genes	Cluster_lipid_metabolic_process_GO	0.432032	0.291305	0.859273	507.638	342.283	1009.65	1	470	19	4802
Cluster_YPS163_Repressed_logFC_Genes	Cluster_structural_molecule_activity_GO	0.432032	0.291305	0.859273	507.638	342.283	1009.65	1	470	19	4802
Cluster_YPS163_Repressed_logFC_Genes	Cluster_nuclear_membrane_GO	0.432032	0.291305	0.859273	507.638	342.283	1009.65	1	470	19	4802
Cluster_YJM1389_Repressed_logFC_Genes	Cluster_Phospholipid_APGcategory	0.432698	0.206865	0.774167	508.42	243.066	909.646	3	674	28	4802
Cluster_DBVPG1373_Repressed_logFC_Genes	Cluster_ESR_APGcategory	0.433233	0.0555862	0.622353	509.049	65.3138	731.265	62	404	758	4802
Cluster_Y2209_Repressed_logFC_Genes	Cluster_NuclearProteinTargetting_APGcategory	0.433559	0.233972	0.800413	509.432	274.917	940.485	2	350	40	4802
Cluster_Y12_Repressed_logFC_Genes	Cluster_RNA_modification_GO	0.433844	0.235691	0.801846	509.767	276.937	942.169	2	450	31	4802
Cluster_Y12_Repressed_logFC_Genes	Cluster_protein_transporter_activity_GO	0.433844	0.235691	0.801846	509.767	276.937	942.169	2	450	31	4802
Cluster_YJM1592_Repressed_logFC_Genes	Cluster_cytoskeleton_organization_GO	0.43449	0.247258	0.812769	510.526	290.528	955.004	2	1050	13	4802
Cluster_YJM1592_Repressed_logFC_Genes	Cluster_ATP-dependent_helicase_activity_GO	0.43449	0.247258	0.812769	510.526	290.528	955.004	2	1050	13	4802
Cluster_YJM1592_Repressed_logFC_Genes	Cluster_transcription_activator_activity_GO	0.43449	0.247258	0.812769	510.526	290.528	955.004	2	1050	13	4802
Cluster_YJM978_Repressed_logFC_Genes	Cluster_vacuole_fusion,_non-autophagic"_GO	0.435677	0.293082	0.857406	511.92	344.371	1007.45	1	467	19	4802
Cluster_YJM978_Repressed_logFC_Genes	Cluster_lipid_metabolic_process_GO	0.435677	0.293082	0.857406	511.92	344.371	1007.45	1	467	19	4802
Cluster_DBVPG1373_Repressed_logFC_Genes	Cluster_response_to_oidative_stress_GO	0.436449	0.292435	0.855987	512.828	343.611	1005.78	1	404	22	4802
Cluster_DBVPG1373_Repressed_logFC_Genes	Cluster_nucleotidyltransferase_activity_GO	0.436449	0.292435	0.855987	512.828	343.611	1005.78	1	404	22	4802
Cluster_YJM1389_Repressed_logFC_Genes	Cluster_chromatin_silencing_at_silent_mating-type_cassette_GO	0.436865	0.297236	0.860372	513.316	349.252	1010.94	1	674	13	4802
Cluster_YJM1389_Repressed_logFC_Genes	Cluster_tRNA_modification_GO	0.436865	0.297236	0.860372	513.316	349.252	1010.94	1	674	13	4802
Cluster_YJM1389_Repressed_logFC_Genes	Cluster_eocytosis_GO	0.436865	0.297236	0.860372	513.316	349.252	1010.94	1	674	13	4802
Cluster_YJM1389_Repressed_logFC_Genes	Cluster_cellular_bud_site_selection_GO	0.436865	0.297236	0.860372	513.316	349.252	1010.94	1	674	13	4802
Cluster_YJM1389_Repressed_logFC_Genes	Cluster_ATP-dependent_helicase_activity_GO	0.436865	0.297236	0.860372	513.316	349.252	1010.94	1	674	13	4802
Cluster_Y12_Repressed_logFC_Genes	Cluster_protein_binding_GO	0.437126	0.166663	0.729538	513.623	195.829	857.207	5	450	64	4802
Cluster_BY4743_Repressed_logFC_Genes	Cluster_aging_GO	0.439898	0.309052	0.869157	516.88	363.136	1021.26	1	1210	7	4802
Cluster_BY4743_Repressed_logFC_Genes	Cluster_cytoskeletal_protein_binding_GO	0.439898	0.309052	0.869157	516.88	363.136	1021.26	1	1210	7	4802
Cluster_BY4743_Repressed_logFC_Genes	Cluster_protein_localization_GO	0.439898	0.309052	0.869157	516.88	363.136	1021.26	1	1210	7	4802
Cluster_BY4743_Repressed_logFC_Genes	Cluster_protein_amino_acid_acetylation_GO	0.439898	0.309052	0.869157	516.88	363.136	1021.26	1	1210	7	4802
Cluster_BY4743_Repressed_logFC_Genes	Cluster_regulation_of_translational_initiation_GO	0.439898	0.309052	0.869157	516.88	363.136	1021.26	1	1210	7	4802
Cluster_BY4743_Repressed_logFC_Genes	Cluster_fungal-type_cell_wall_organization_GO	0.439898	0.309052	0.869157	516.88	363.136	1021.26	1	1210	7	4802
Cluster_BY4743_Repressed_logFC_Genes	Cluster_histone_deacetylation_GO	0.439898	0.309052	0.869157	516.88	363.136	1021.26	1	1210	7	4802
Cluster_BY4743_Repressed_logFC_Genes	Cluster_cellular_ion_homeostasis_GO	0.439898	0.309052	0.869157	516.88	363.136	1021.26	1	1210	7	4802
Cluster_BY4743_Repressed_logFC_Genes	Cluster_Glycerol_APGcategory	0.439898	0.309052	0.869157	516.88	363.136	1021.26	1	1210	7	4802
Cluster_BY4743_Repressed_logFC_Genes	Cluster_protein_transmembrane_transporter_activity_GO	0.439898	0.309052	0.869157	516.88	363.136	1021.26	1	1210	7	4802
Cluster_BY4743_Repressed_logFC_Genes	Cluster_histone_deacetylase_activity_GO	0.439898	0.309052	0.869157	516.88	363.136	1021.26	1	1210	7	4802
Cluster_BY4743_Repressed_logFC_Genes	Cluster_response_to_starvation_GO	0.439898	0.309052	0.869157	516.88	363.136	1021.26	1	1210	7	4802
Cluster_BY4743_Repressed_logFC_Genes	Cluster_DNA_replication_preinitiation_complex_GO	0.439898	0.309052	0.869157	516.88	363.136	1021.26	1	1210	7	4802
Cluster_BY4743_Repressed_logFC_Genes	Cluster_phosphotransferase_activity,_alcohol_group_as_acceptor"_GO	0.439898	0.309052	0.869157	516.88	363.136	1021.26	1	1210	7	4802
Cluster_BY4743_Repressed_logFC_Genes	Cluster_ATPase_activity,_coupled_to_transmembrane_movement_of_substances"_GO	0.439898	0.309052	0.869157	516.88	363.136	1021.26	1	1210	7	4802
Cluster_BY4743_Repressed_logFC_Genes	Cluster_sphingolipid_metabolic_process_GO	0.439898	0.309052	0.869157	516.88	363.136	1021.26	1	1210	7	4802
Cluster_BY4743_Repressed_logFC_Genes	Cluster_protein_polyubiquitination_GO	0.439898	0.309052	0.869157	516.88	363.136	1021.26	1	1210	7	4802
Cluster_YJM1273_Repressed_logFC_Genes	Cluster_NuclearProteinTargetting_APGcategory	0.440088	0.205419	0.765331	517.103	241.367	899.264	3	470	40	4802
Cluster_YPS606_Repressed_logFC_Genes	Cluster_Vacuole_APGcategory	0.440662	0.183175	0.742513	517.778	215.231	872.453	4	440	54	4802
Cluster_YPS606_Repressed_logFC_Genes	Cluster_manganese_ion_binding_GO	0.440998	0.295274	0.854276	518.173	346.947	1003.77	1	440	20	4802
Cluster_YPS606_Repressed_logFC_Genes	Cluster_Repressed_regulation_of_transposition,_RNA-mediated"_GO	0.440998	0.295274	0.854276	518.173	346.947	1003.77	1	440	20	4802
Cluster_YPS606_Repressed_logFC_Genes	Cluster_mRNA_transport_GO	0.440998	0.295274	0.854276	518.173	346.947	1003.77	1	440	20	4802
Cluster_YPS606_Repressed_logFC_Genes	Cluster_telomere_maintenance_GO	0.440998	0.295274	0.854276	518.173	346.947	1003.77	1	440	20	4802
Cluster_NCYC3290_Repressed_logFC_Genes	Cluster_small_GTPase_mediated_signal_transduction_GO	0.441072	0.242414	0.801342	518.26	284.836	941.577	2	685	20	4802
Cluster_NCYC3290_Repressed_logFC_Genes	Cluster_manganese_ion_binding_GO	0.441072	0.242414	0.801342	518.26	284.836	941.577	2	685	20	4802
Cluster_NCYC3290_Repressed_logFC_Genes	Cluster_Repressed_regulation_of_transposition,_RNA-mediated"_GO	0.441072	0.242414	0.801342	518.26	284.836	941.577	2	685	20	4802
Cluster_NCYC3290_Repressed_logFC_Genes	Cluster_mRNA_transport_GO	0.441072	0.242414	0.801342	518.26	284.836	941.577	2	685	20	4802
Cluster_YPS128_Repressed_logFC_Genes	Cluster_mitosis_GO	0.441626	0.236916	0.79529	518.911	278.376	934.466	2	364	38	4802
Cluster_YJM1592_Repressed_logFC_Genes	Cluster_Induced_regulation_of_transcription_from_RNA_polymerase_II_promoter_GO	0.442466	0.177516	0.735049	519.898	208.581	863.683	5	1050	27	4802
Cluster_Y2209_Repressed_logFC_Genes	Cluster_cytosol_GO	0.443049	0.154196	0.711147	520.583	181.18	835.598	6	350	96	4802
Cluster_Y7568_Repressed_logFC_Genes	Cluster_tRNA_processing_GO	0.443415	0.295498	0.852083	521.013	347.21	1001.2	1	382	23	4802
Cluster_YJM1592_Repressed_logFC_Genes	Cluster_cellular_bud_neck_GO	0.443777	0.145737	0.70196	521.438	171.241	824.803	8	1050	41	4802
Cluster_BC187_Repressed_logFC_Genes	Cluster_manganese_ion_binding_GO	0.444871	0.297124	0.852254	522.723	349.121	1001.4	1	437	20	4802
Cluster_BC187_Repressed_logFC_Genes	Cluster_protein_ubiquitination_GO	0.444871	0.297124	0.852254	522.723	349.121	1001.4	1	437	20	4802
Cluster_BC187_Repressed_logFC_Genes	Cluster_Repressed_regulation_of_transposition,_RNA-mediated"_GO	0.444871	0.297124	0.852254	522.723	349.121	1001.4	1	437	20	4802
Cluster_BC187_Repressed_logFC_Genes	Cluster_response_to_osmotic_stress_GO	0.444871	0.297124	0.852254	522.723	349.121	1001.4	1	437	20	4802
Cluster_BC187_Repressed_logFC_Genes	Cluster_cytoplasmic_vesicle_GO	0.444871	0.297124	0.852254	522.723	349.121	1001.4	1	437	20	4802
Cluster_YJM978_Repressed_logFC_Genes	Cluster_cellular_metabolic_compound_salvage_GO	0.445372	0.206753	0.761381	523.312	242.935	894.623	3	467	40	4802
Cluster_Y2209_Repressed_logFC_Genes	Cluster_ER_to_Golgi_vesicle-mediated_transport_GO	0.446505	0.296473	0.849968	524.643	348.356	998.712	1	350	25	4802
Cluster_YPS128_Repressed_logFC_Genes	Cluster_general_RNA_polymerase_II_transcription_factor_activity_GO	0.447031	0.296955	0.849925	525.261	348.922	998.662	1	364	24	4802
Cluster_YPS128_Repressed_logFC_Genes	Cluster_lipid_biosynthetic_process_GO	0.447031	0.296955	0.849925	525.261	348.922	998.662	1	364	24	4802
Cluster_BY4743_Repressed_logFC_Genes	Cluster_histone_acetylation_GO	0.448923	0.2562	0.807277	527.485	301.035	948.55	2	1210	11	4802
Cluster_BY4743_Repressed_logFC_Genes	Cluster_phosphoprotein_phosphatase_activity_GO	0.448923	0.2562	0.807277	527.485	301.035	948.55	2	1210	11	4802
Cluster_BY4743_Repressed_logFC_Genes	Cluster_mitochondrial_membrane_GO	0.448923	0.2562	0.807277	527.485	301.035	948.55	2	1210	11	4802
Cluster_BY4743_Repressed_logFC_Genes	Cluster_hydrolase_activity,_acting_on_glycosyl_bonds"_GO	0.448923	0.2562	0.807277	527.485	301.035	948.55	2	1210	11	4802
Cluster_BY4743_Repressed_logFC_Genes	Cluster_protein_amino_acid_dephosphorylation_GO	0.448923	0.2562	0.807277	527.485	301.035	948.55	2	1210	11	4802
Cluster_NCYC3290_Repressed_logFC_Genes	Cluster_intracellular_protein_transmembrane_transport_GO	0.449232	0.211577	0.762345	527.848	248.603	895.755	3	685	27	4802
Cluster_NCYC3290_Repressed_logFC_Genes	Cluster_fungal-type_vacuole_membrane_GO	0.449232	0.211577	0.762345	527.848	248.603	895.755	3	685	27	4802
Cluster_NCYC3290_Repressed_logFC_Genes	Cluster_isomerase_activity_GO	0.449232	0.211577	0.762345	527.848	248.603	895.755	3	685	27	4802
Cluster_YJM1273_Repressed_logFC_Genes	Cluster_nuclease_activity_GO	0.449587	0.241364	0.791778	528.265	283.603	930.339	2	470	29	4802
Cluster_YJM1273_Repressed_logFC_Genes	Cluster_ion_transport_GO	0.449587	0.241364	0.791778	528.265	283.603	930.339	2	470	29	4802
Cluster_YPS163_Repressed_logFC_Genes	Cluster_GTP_binding_GO	0.449587	0.241364	0.791778	528.265	283.603	930.339	2	470	29	4802
Cluster_YJM1592_Repressed_logFC_Genes	Cluster_response_to_arsenic_GO	0.44974	0.311059	0.86132	528.444	365.494	1012.05	1	1050	8	4802
Cluster_YJM1592_Repressed_logFC_Genes	Cluster_SNAP_receptor_activity_GO	0.44974	0.311059	0.86132	528.444	365.494	1012.05	1	1050	8	4802
Cluster_YJM1592_Repressed_logFC_Genes	Cluster_mitochondrial_intermembrane_space_GO	0.44974	0.311059	0.86132	528.444	365.494	1012.05	1	1050	8	4802
Cluster_YJM1592_Repressed_logFC_Genes	Cluster_transcription_factor_complex_GO	0.44974	0.311059	0.86132	528.444	365.494	1012.05	1	1050	8	4802
Cluster_YJM1592_Repressed_logFC_Genes	Cluster_ATP-dependent_RNA_helicase_activity_GO	0.44974	0.311059	0.86132	528.444	365.494	1012.05	1	1050	8	4802
Cluster_YJM1592_Repressed_logFC_Genes	Cluster_proteasome_complex_GO	0.44974	0.311059	0.86132	528.444	365.494	1012.05	1	1050	8	4802
Cluster_YJM1592_Repressed_logFC_Genes	Cluster_chronological_cell_aging_GO	0.44974	0.311059	0.86132	528.444	365.494	1012.05	1	1050	8	4802
Cluster_YJM1592_Repressed_logFC_Genes	Cluster_aminopeptidase_activity_GO	0.44974	0.311059	0.86132	528.444	365.494	1012.05	1	1050	8	4802
Cluster_YJM1592_Repressed_logFC_Genes	Cluster_intra-Golgi_vesicle-mediated_transport_GO	0.44974	0.311059	0.86132	528.444	365.494	1012.05	1	1050	8	4802
Cluster_YJM1592_Repressed_logFC_Genes	Cluster_DNA_helicase_activity_GO	0.44974	0.311059	0.86132	528.444	365.494	1012.05	1	1050	8	4802
Cluster_YJM1592_Repressed_logFC_Genes	Cluster_serine-type_peptidase_activity_GO	0.44974	0.311059	0.86132	528.444	365.494	1012.05	1	1050	8	4802
Cluster_YJM1592_Repressed_logFC_Genes	Cluster_response_to_heat_GO	0.44974	0.311059	0.86132	528.444	365.494	1012.05	1	1050	8	4802
Cluster_YJM1592_Repressed_logFC_Genes	Cluster_nuclear-transcribed_mRNA_catabolic_process,_non-stop_decay"_GO	0.44974	0.311059	0.86132	528.444	365.494	1012.05	1	1050	8	4802
Cluster_YJM1592_Repressed_logFC_Genes	Cluster_DNA_damage_checkpoint_GO	0.44974	0.311059	0.86132	528.444	365.494	1012.05	1	1050	8	4802
Cluster_YJM1592_Repressed_logFC_Genes	Cluster_SAGA_complex_GO	0.44974	0.311059	0.86132	528.444	365.494	1012.05	1	1050	8	4802
Cluster_YJM1592_Repressed_logFC_Genes	Cluster_SLIK_(SAGA-like)_complex_GO	0.44974	0.311059	0.86132	528.444	365.494	1012.05	1	1050	8	4802
Cluster_YJM1592_Repressed_logFC_Genes	Cluster_fatty_acid_metabolic_process_GO	0.44974	0.311059	0.86132	528.444	365.494	1012.05	1	1050	8	4802
Cluster_YJM1592_Repressed_logFC_Genes	Cluster_iron-sulfur_cluster_assembly_GO	0.44974	0.311059	0.86132	528.444	365.494	1012.05	1	1050	8	4802
Cluster_YPS163_Repressed_logFC_Genes	Cluster_protein_amino_acid_phosphorylation_GO	0.450255	0.185667	0.735411	529.05	218.159	864.108	4	470	50	4802
Cluster_Y2209_Repressed_logFC_Genes	Cluster_DNA_replication_GO	0.45108	0.239794	0.788714	530.019	281.758	926.739	2	350	39	4802
Cluster_YJM1273_Repressed_logFC_Genes	Cluster_transferase_activity_GO	0.451359	0.0989176	0.647559	530.347	116.228	760.882	17	470	185	4802
Cluster_YJM1389_Repressed_logFC_Genes	Cluster_protein_ubiquitination_GO	0.452814	0.246256	0.793442	532.056	289.351	932.294	2	674	20	4802
Cluster_YJM1389_Repressed_logFC_Genes	Cluster_telomere_maintenance_GO	0.452814	0.246256	0.793442	532.056	289.351	932.294	2	674	20	4802
Cluster_BY4743_Repressed_logFC_Genes	Cluster_guanyl-nucleotide_echange_factor_activity_GO	0.45398	0.22362	0.76964	533.427	262.753	904.327	3	1210	15	4802
Cluster_BY4743_Repressed_logFC_Genes	Cluster_regulation_of_cell_cycle_GO	0.45398	0.22362	0.76964	533.427	262.753	904.327	3	1210	15	4802
Cluster_Y389_Repressed_logFC_Genes	Cluster_proteolysis_GO	0.454139	0.157835	0.703696	533.613	185.456	826.843	6	503	66	4802
Cluster_BC187_Repressed_logFC_Genes	Cluster_endocytosis_GO	0.454543	0.242403	0.78786	534.088	284.824	925.736	2	437	31	4802
Cluster_BC187_Repressed_logFC_Genes	Cluster_RNA_modification_GO	0.454543	0.242403	0.78786	534.088	284.824	925.736	2	437	31	4802
Cluster_Y389_Repressed_logFC_Genes	Cluster_phosphoinositide_binding_GO	0.455241	0.303317	0.848076	534.908	356.397	996.489	1	503	17	4802
Cluster_YJM1592_Repressed_logFC_Genes	Cluster_transcription_from_RNA_polymerase_II_promoter_GO	0.455724	0.197295	0.741571	535.476	231.822	871.346	4	1050	22	4802
Cluster_Y12_Repressed_logFC_Genes	Cluster_tRNAsynth_APGcategory	0.456688	0.243329	0.786641	536.608	285.912	924.303	2	450	30	4802
Cluster_Y12_Repressed_logFC_Genes	Cluster_structural_molecule_activity_GO	0.456695	0.303069	0.846374	536.617	356.106	994.489	1	450	19	4802
Cluster_BY4743_Repressed_logFC_Genes	Cluster_GTPase_activator_activity_GO	0.457215	0.200986	0.743771	537.228	236.159	873.931	4	1210	19	4802
Cluster_NCYC3290_Repressed_logFC_Genes	Cluster_mating_projection_tip_GO	0.458941	0.174235	0.715294	539.256	204.726	840.47	5	685	41	4802
Cluster_NCYC3290_Repressed_logFC_Genes	Cluster_metal_ion_binding_GO	0.460644	0.0792974	0.618653	541.257	93.1744	726.917	29	685	211	4802
Cluster_YPS163_Repressed_logFC_Genes	Cluster_unfolded_protein_binding_GO	0.460743	0.210668	0.749925	541.373	247.535	881.162	3	470	39	4802
Cluster_Y7568_Repressed_logFC_Genes	Cluster_protein_serine/threonine_kinase_activity_GO	0.462006	0.209512	0.747506	542.857	246.177	878.32	3	382	48	4802
Cluster_Y7568_Repressed_logFC_Genes	Cluster_protein_kinase_activity_GO	0.462006	0.209512	0.747506	542.857	246.177	878.32	3	382	48	4802
Cluster_YJM1273_Repressed_logFC_Genes	Cluster_aerobic_respiration_GO	0.462028	0.305969	0.843941	542.883	359.514	991.631	1	470	18	4802
Cluster_YJM1273_Repressed_logFC_Genes	Cluster_RNA_elongation_from_RNA_polymerase_II_promoter_GO	0.462028	0.305969	0.843941	542.883	359.514	991.631	1	470	18	4802
Cluster_YPS163_Repressed_logFC_Genes	Cluster_aerobic_respiration_GO	0.462028	0.305969	0.843941	542.883	359.514	991.631	1	470	18	4802
Cluster_YPS163_Repressed_logFC_Genes	Cluster_ER-associated_protein_catabolic_process_GO	0.462028	0.305969	0.843941	542.883	359.514	991.631	1	470	18	4802
Cluster_DBVPG1373_Repressed_logFC_Genes	Cluster_sporulation_resulting_in_formation_of_a_cellular_spore_GO	0.462144	0.304838	0.842694	543.019	358.185	990.165	1	404	21	4802
Cluster_DBVPG1373_Repressed_logFC_Genes	Cluster_methyltransferase_activity_GO	0.462144	0.304838	0.842694	543.019	358.185	990.165	1	404	21	4802
Cluster_DBVPG1373_Repressed_logFC_Genes	Cluster_chromosome_segregation_GO	0.462144	0.304838	0.842694	543.019	358.185	990.165	1	404	21	4802
Cluster_DBVPG1373_Repressed_logFC_Genes	Cluster_cellular_bud_tip_GO	0.462144	0.304838	0.842694	543.019	358.185	990.165	1	404	21	4802
Cluster_YJM1389_Repressed_logFC_Genes	Cluster_fungal-type_vacuole_membrane_GO	0.462896	0.214899	0.752003	543.903	252.506	883.604	3	674	27	4802
Cluster_YJM1389_Repressed_logFC_Genes	Cluster_Sterols_APGcategory	0.462896	0.214899	0.752003	543.903	252.506	883.604	3	674	27	4802
Cluster_YJM1389_Repressed_logFC_Genes	Cluster_isomerase_activity_GO	0.462896	0.214899	0.752003	543.903	252.506	883.604	3	674	27	4802
Cluster_YJM1389_Repressed_logFC_Genes	Cluster_binding_GO	0.4641	0.119011	0.654911	545.317	139.838	769.52	12	674	92	4802
Cluster_YJM978_Repressed_logFC_Genes	Cluster_cell_wall_organization_GO	0.464647	0.171785	0.707137	545.96	201.847	830.886	5	467	60	4802
Cluster_YJM978_Repressed_logFC_Genes	Cluster_electron_carrier_activity_GO	0.465641	0.307622	0.841981	547.128	361.456	989.328	1	467	18	4802
Cluster_YJM978_Repressed_logFC_Genes	Cluster_protein_complex_assembly_GO	0.465641	0.307622	0.841981	547.128	361.456	989.328	1	467	18	4802
Cluster_YJM978_Repressed_logFC_Genes	Cluster_Mitochondria_APGcategory	0.466013	0.211888	0.745874	547.565	248.968	876.402	3	467	39	4802
Cluster_YPS128_Repressed_logFC_Genes	Cluster_nucleotide_binding_GO	0.466134	0.0993394	0.633206	547.707	116.724	744.017	17	364	237	4802
Cluster_BC187_Repressed_logFC_Genes	Cluster_kinase_activity_GO	0.466941	0.171726	0.704785	548.656	201.778	828.122	5	437	64	4802
Cluster_Y2209_Repressed_logFC_Genes	Cluster_proteolysis_GO	0.467798	0.187364	0.719566	549.663	220.153	845.49	4	350	66	4802
Cluster_Y7568_Repressed_logFC_Genes	Cluster_DNA_recombination_GO	0.467896	0.307131	0.839235	549.778	360.879	986.101	1	382	22	4802
Cluster_Y7568_Repressed_logFC_Genes	Cluster_acyltransferase_activity_GO	0.467896	0.307131	0.839235	549.778	360.879	986.101	1	382	22	4802
Cluster_Y7568_Repressed_logFC_Genes	Cluster_response_to_oidative_stress_GO	0.467896	0.307131	0.839235	549.778	360.879	986.101	1	382	22	4802
Cluster_Y7568_Repressed_logFC_Genes	Cluster_nucleotidyltransferase_activity_GO	0.467896	0.307131	0.839235	549.778	360.879	986.101	1	382	22	4802
Cluster_Y7568_Repressed_logFC_Genes	Cluster_spindle_pole_body_GO	0.467896	0.307131	0.839235	549.778	360.879	986.101	1	382	22	4802
Cluster_Y2209_Repressed_logFC_Genes	Cluster_ascospore_formation_GO	0.468932	0.307041	0.838109	550.995	360.773	984.778	1	350	24	4802
Cluster_Y2209_Repressed_logFC_Genes	Cluster_RNAPol_APGcategory	0.469007	0.245424	0.776417	551.083	288.373	912.29	2	350	38	4802
Cluster_Y2209_Repressed_logFC_Genes	Cluster_mitosis_GO	0.469007	0.245424	0.776417	551.083	288.373	912.29	2	350	38	4802
Cluster_YPS606_Repressed_logFC_Genes	Cluster_vacuole_fusion,_non-autophagic"_GO	0.469346	0.308858	0.839512	551.482	362.908	986.427	1	440	19	4802
Cluster_YPS606_Repressed_logFC_Genes	Cluster_lipid_metabolic_process_GO	0.469346	0.308858	0.839512	551.482	362.908	986.427	1	440	19	4802
Cluster_YPS606_Repressed_logFC_Genes	Cluster_structural_molecule_activity_GO	0.469346	0.308858	0.839512	551.482	362.908	986.427	1	440	19	4802
Cluster_YPS606_Repressed_logFC_Genes	Cluster_endopeptidase_activity_GO	0.469346	0.308858	0.839512	551.482	362.908	986.427	1	440	19	4802
Cluster_YPS606_Repressed_logFC_Genes	Cluster_GTPase_activator_activity_GO	0.469346	0.308858	0.839512	551.482	362.908	986.427	1	440	19	4802
Cluster_YPS606_Repressed_logFC_Genes	Cluster_protein_targeting_to_vacuole_GO	0.469346	0.308858	0.839512	551.482	362.908	986.427	1	440	19	4802
Cluster_Y389_Repressed_logFC_Genes	Cluster_peptidyl-amino_acid_modification_GO	0.4701	0.213491	0.743391	552.367	250.852	873.484	3	503	36	4802
Cluster_YPS128_Repressed_logFC_Genes	Cluster_pseudohyphal_growth_GO	0.470423	0.307975	0.837552	552.747	361.871	984.124	1	364	23	4802
Cluster_Y12_Repressed_logFC_Genes	Cluster_vacuolar_protein_catabolic_process_GO	0.472314	0.189721	0.717406	554.969	222.922	842.952	4	450	51	4802
Cluster_NCYC3290_Repressed_logFC_Genes	Cluster_TFs_APGcategory	0.472403	0.315038	0.842634	555.074	370.17	990.095	1	685	12	4802
Cluster_NCYC3290_Repressed_logFC_Genes	Cluster_transcription_factor_TFIID_complex_GO	0.472403	0.315038	0.842634	555.074	370.17	990.095	1	685	12	4802
Cluster_NCYC3290_Repressed_logFC_Genes	Cluster_response_to_pheromone_GO	0.472403	0.315038	0.842634	555.074	370.17	990.095	1	685	12	4802
Cluster_NCYC3290_Repressed_logFC_Genes	Cluster_reciprocal_meiotic_recombination_GO	0.472403	0.315038	0.842634	555.074	370.17	990.095	1	685	12	4802
Cluster_NCYC3290_Repressed_logFC_Genes	Cluster_cell_death_GO	0.472403	0.315038	0.842634	555.074	370.17	990.095	1	685	12	4802
Cluster_NCYC3290_Repressed_logFC_Genes	Cluster_one-carbon_compound_metabolic_process_GO	0.472403	0.315038	0.842634	555.074	370.17	990.095	1	685	12	4802
Cluster_NCYC3290_Repressed_logFC_Genes	Cluster_chromatin_remodeling_GO	0.472403	0.315038	0.842634	555.074	370.17	990.095	1	685	12	4802
Cluster_BC187_Repressed_logFC_Genes	Cluster_lipid_metabolic_process_GO	0.473182	0.310579	0.837397	555.989	364.93	983.941	1	437	19	4802
Cluster_YJM1273_Repressed_logFC_Genes	Cluster_establishment_of_protein_localization_GO	0.47401	0.249142	0.775132	556.962	292.742	910.78	2	470	28	4802
Cluster_YPS163_Repressed_logFC_Genes	Cluster_establishment_of_protein_localization_GO	0.47401	0.249142	0.775132	556.962	292.742	910.78	2	470	28	4802
Cluster_Y12_Repressed_logFC_Genes	Cluster_intracellular_protein_transport_GO	0.475865	0.213888	0.738023	559.141	251.318	867.177	3	450	40	4802
Cluster_YJM1389_Repressed_logFC_Genes	Cluster_integral_to_membrane_GO	0.476072	0.0732624	0.59719	559.385	86.0833	701.698	35	674	256	4802
Cluster_BC187_Repressed_logFC_Genes	Cluster_tRNAsynth_APGcategory	0.477288	0.249509	0.772221	560.813	293.173	907.36	2	437	30	4802
Cluster_NCYC3290_Repressed_logFC_Genes	Cluster_vacuole_fusion,_non-autophagic"_GO	0.477416	0.254517	0.777101	560.964	299.057	913.094	2	685	19	4802
Cluster_NCYC3290_Repressed_logFC_Genes	Cluster_structural_molecule_activity_GO	0.477416	0.254517	0.777101	560.964	299.057	913.094	2	685	19	4802
Cluster_NCYC3290_Repressed_logFC_Genes	Cluster_protein_targeting_to_vacuole_GO	0.477416	0.254517	0.777101	560.964	299.057	913.094	2	685	19	4802
Cluster_Y389_Repressed_logFC_Genes	Cluster_regulation_of_transcription_GO	0.477704	0.250905	0.773201	561.302	294.813	908.511	2	503	26	4802
Cluster_YJM978_Repressed_logFC_Genes	Cluster_FattyAcid_APGcategory	0.47851	0.250449	0.771939	562.249	294.278	907.028	2	467	28	4802
Cluster_YJM978_Repressed_logFC_Genes	Cluster_endosome_membrane_GO	0.47851	0.250449	0.771939	562.249	294.278	907.028	2	467	28	4802
Cluster_YPS128_Repressed_logFC_Genes	Cluster_rRNA_metabolic_process_GO	0.47885	0.172569	0.693719	562.649	202.769	815.12	5	364	76	4802
Cluster_YPS128_Repressed_logFC_Genes	Cluster_ligase_activity_GO	0.478966	0.248657	0.769691	562.785	292.172	904.387	2	364	36	4802
Cluster_YJM1592_Repressed_logFC_Genes	Cluster_DNA_binding_GO	0.479116	0.0760943	0.596979	562.961	89.4108	701.45	35	1050	164	4802
Cluster_Y7568_Repressed_logFC_Genes	Cluster_Spellman_M-G1_peak	0.479938	0.159882	0.679943	563.927	187.861	798.933	6	382	85	4802
Cluster_Y12_Repressed_logFC_Genes	Cluster_helicase_activity_GO	0.480213	0.250632	0.770419	564.25	294.493	905.242	2	450	29	4802
Cluster_YJM1389_Repressed_logFC_Genes	Cluster_RNA_processing_GO	0.481716	0.319223	0.837507	566.016	375.087	984.071	1	674	12	4802
Cluster_YJM1389_Repressed_logFC_Genes	Cluster_tRNA_export_from_nucleus_GO	0.481716	0.319223	0.837507	566.016	375.087	984.071	1	674	12	4802
Cluster_YJM1389_Repressed_logFC_Genes	Cluster_protein_modification_process_GO	0.481716	0.319223	0.837507	566.016	375.087	984.071	1	674	12	4802
Cluster_YJM1389_Repressed_logFC_Genes	Cluster_transcription_coactivator_activity_GO	0.481716	0.319223	0.837507	566.016	375.087	984.071	1	674	12	4802
Cluster_YJM1389_Repressed_logFC_Genes	Cluster_establishment_or_maintenance_of_chromatin_architecture_GO	0.481716	0.319223	0.837507	566.016	375.087	984.071	1	674	12	4802
Cluster_YJM1389_Repressed_logFC_Genes	Cluster_response_to_pheromone_GO	0.481716	0.319223	0.837507	566.016	375.087	984.071	1	674	12	4802
Cluster_YJM1389_Repressed_logFC_Genes	Cluster_retrograde_vesicle-mediated_transport,_Golgi_to_ER"_GO	0.481716	0.319223	0.837507	566.016	375.087	984.071	1	674	12	4802
Cluster_YJM1389_Repressed_logFC_Genes	Cluster_Rho_protein_signal_transduction_GO	0.481716	0.319223	0.837507	566.016	375.087	984.071	1	674	12	4802
Cluster_YJM1389_Repressed_logFC_Genes	Cluster_cell_death_GO	0.481716	0.319223	0.837507	566.016	375.087	984.071	1	674	12	4802
Cluster_YJM1389_Repressed_logFC_Genes	Cluster_DrugResistance_APGcategory	0.481716	0.319223	0.837507	566.016	375.087	984.071	1	674	12	4802
Cluster_YJM1273_Repressed_logFC_Genes	Cluster_cytoskeleton_GO	0.481878	0.215597	0.73372	566.207	253.326	862.121	3	470	38	4802
Cluster_YPS163_Repressed_logFC_Genes	Cluster_cytoskeleton_GO	0.481878	0.215597	0.73372	566.207	253.326	862.121	3	470	38	4802
Cluster_NCYC3290_Repressed_logFC_Genes	Cluster_signal_transduction_GO	0.482767	0.195765	0.712998	567.251	230.024	837.773	4	685	33	4802
Cluster_NCYC3290_Repressed_logFC_Genes	Cluster_intracellular_protein_transport_GO	0.484426	0.178472	0.694046	569.201	209.705	815.504	5	685	40	4802
Cluster_Y7568_Repressed_logFC_Genes	Cluster_ubiquitin-dependent_protein_catabolic_process_GO	0.484455	0.173638	0.689182	569.235	204.025	809.789	5	382	72	4802
Cluster_Y7568_Repressed_logFC_Genes	Cluster_fungal-type_vacuole_GO	0.484752	0.250677	0.765925	569.584	294.545	899.962	2	382	34	4802
Cluster_BC187_Repressed_logFC_Genes	Cluster_cytosol_GO	0.485175	0.141981	0.656806	570.081	166.828	771.747	8	437	96	4802
Cluster_Y12_Repressed_logFC_Genes	Cluster_ER-associated_protein_catabolic_process_GO	0.486433	0.316856	0.830423	571.559	372.306	975.747	1	450	18	4802
Cluster_YJM1273_Repressed_logFC_Genes	Cluster_endosome_GO	0.487724	0.192822	0.705098	573.076	226.566	828.49	4	470	48	4802
Cluster_YJM1273_Repressed_logFC_Genes	Cluster_protein_kinase_activity_GO	0.487724	0.192822	0.705098	573.076	226.566	828.49	4	470	48	4802
Cluster_YPS163_Repressed_logFC_Genes	Cluster_protein_serine/threonine_kinase_activity_GO	0.487724	0.192822	0.705098	573.076	226.566	828.49	4	470	48	4802
Cluster_YPS163_Repressed_logFC_Genes	Cluster_protein_kinase_activity_GO	0.487724	0.192822	0.705098	573.076	226.566	828.49	4	470	48	4802
Cluster_DBVPG1373_Repressed_logFC_Genes	Cluster_maturation_of_SSU-rRNA_from_tricistronic_rRNA_transcript_(SSU-rRNA,_5.8S_rRNA,_LSU-rRNA)"_GO	0.488862	0.317041	0.828178	574.413	372.523	973.109	1	404	20	4802
Cluster_DBVPG1373_Repressed_logFC_Genes	Cluster_incipient_cellular_bud_site_GO	0.488862	0.317041	0.828178	574.413	372.523	973.109	1	404	20	4802
Cluster_DBVPG1373_Repressed_logFC_Genes	Cluster_protein_ubiquitination_GO	0.488862	0.317041	0.828178	574.413	372.523	973.109	1	404	20	4802
Cluster_DBVPG1373_Repressed_logFC_Genes	Cluster_rRNA_export_from_nucleus_GO	0.488862	0.317041	0.828178	574.413	372.523	973.109	1	404	20	4802
Cluster_DBVPG1373_Repressed_logFC_Genes	Cluster_G1/S_transition_of_mitotic_cell_cycle_GO	0.488862	0.317041	0.828178	574.413	372.523	973.109	1	404	20	4802
Cluster_DBVPG1373_Repressed_logFC_Genes	Cluster_mRNA_transport_GO	0.488862	0.317041	0.828178	574.413	372.523	973.109	1	404	20	4802
Cluster_DBVPG1373_Repressed_logFC_Genes	Cluster_telomere_maintenance_GO	0.488862	0.317041	0.828178	574.413	372.523	973.109	1	404	20	4802
Cluster_DBVPG1373_Repressed_logFC_Genes	Cluster_ATP_binding_GO	0.488873	0.106736	0.617862	574.426	125.415	725.988	15	404	187	4802
Cluster_YJM1389_Repressed_logFC_Genes	Cluster_structural_molecule_activity_GO	0.489043	0.257859	0.768816	574.626	302.984	903.359	2	674	19	4802
Cluster_YPS606_Repressed_logFC_Genes	Cluster_biopolymer_biosynthetic_process_GO	0.491998	0.175551	0.683553	578.098	206.272	803.175	5	440	62	4802
Cluster_Y2209_Repressed_logFC_Genes	Cluster_tRNA_processing_GO	0.492113	0.317429	0.825316	578.233	372.979	969.746	1	350	23	4802
Cluster_Y2209_Repressed_logFC_Genes	Cluster_ubiquitin-protein_ligase_activity_GO	0.492113	0.317429	0.825316	578.233	372.979	969.746	1	350	23	4802
Cluster_Y2209_Repressed_logFC_Genes	Cluster_endoplasmic_reticulum_GO	0.492225	0.134408	0.642183	578.364	157.929	754.565	9	350	133	4802
Cluster_Y389_Repressed_logFC_Genes	Cluster_RNA_binding_GO	0.492626	0.129714	0.637087	578.836	152.414	748.577	10	503	102	4802
Cluster_YPS606_Repressed_logFC_Genes	Cluster_response_to_drug_GO	0.492988	0.193215	0.700227	579.261	227.028	822.767	4	440	51	4802
Cluster_YJM1592_Repressed_logFC_Genes	Cluster_DNA_replication_origin_binding_GO	0.493084	0.267813	0.774729	579.374	314.68	910.307	2	1050	12	4802
Cluster_YJM1592_Repressed_logFC_Genes	Cluster_protein_modification_process_GO	0.493084	0.267813	0.774729	579.374	314.68	910.307	2	1050	12	4802
Cluster_YJM1592_Repressed_logFC_Genes	Cluster_transcription_coactivator_activity_GO	0.493084	0.267813	0.774729	579.374	314.68	910.307	2	1050	12	4802
Cluster_YJM1592_Repressed_logFC_Genes	Cluster_transcription_factor_TFIID_complex_GO	0.493084	0.267813	0.774729	579.374	314.68	910.307	2	1050	12	4802
Cluster_YJM1592_Repressed_logFC_Genes	Cluster_response_to_pheromone_GO	0.493084	0.267813	0.774729	579.374	314.68	910.307	2	1050	12	4802
Cluster_YJM1592_Repressed_logFC_Genes	Cluster_retrograde_vesicle-mediated_transport,_Golgi_to_ER"_GO	0.493084	0.267813	0.774729	579.374	314.68	910.307	2	1050	12	4802
Cluster_YJM1592_Repressed_logFC_Genes	Cluster_Golgi_to_vacuole_transport_GO	0.493084	0.267813	0.774729	579.374	314.68	910.307	2	1050	12	4802
Cluster_YJM1592_Repressed_logFC_Genes	Cluster_DrugResistance_APGcategory	0.493084	0.267813	0.774729	579.374	314.68	910.307	2	1050	12	4802
Cluster_Y7568_Repressed_logFC_Genes	Cluster_chromosome_segregation_GO	0.493282	0.318556	0.825275	579.606	374.303	969.698	1	382	21	4802
Cluster_Y7568_Repressed_logFC_Genes	Cluster_Repressed_regulation_of_transcription_from_RNA_polymerase_II_promoter_GO	0.493282	0.318556	0.825275	579.606	374.303	969.698	1	382	21	4802
Cluster_YJM1273_Repressed_logFC_Genes	Cluster_transcription_initiation_from_RNA_polymerase_II_promoter_GO	0.493429	0.320372	0.826943	579.779	376.437	971.658	1	470	17	4802
Cluster_YJM1273_Repressed_logFC_Genes	Cluster_actin_cortical_patch_GO	0.493429	0.320372	0.826943	579.779	376.437	971.658	1	470	17	4802
Cluster_YPS163_Repressed_logFC_Genes	Cluster_bipolar_cellular_bud_site_selection_GO	0.493429	0.320372	0.826943	579.779	376.437	971.658	1	470	17	4802
Cluster_YPS163_Repressed_logFC_Genes	Cluster_transcription_regulator_activity_GO	0.493429	0.320372	0.826943	579.779	376.437	971.658	1	470	17	4802
Cluster_YPS163_Repressed_logFC_Genes	Cluster_replicative_cell_aging_GO	0.493429	0.320372	0.826943	579.779	376.437	971.658	1	470	17	4802
Cluster_YPS163_Repressed_logFC_Genes	Cluster_transcription_initiation_from_RNA_polymerase_II_promoter_GO	0.493429	0.320372	0.826943	579.779	376.437	971.658	1	470	17	4802
Cluster_YPS606_Repressed_logFC_Genes	Cluster_NuclearProteinTargetting_APGcategory	0.494206	0.217708	0.723502	580.692	255.807	850.115	3	440	40	4802
Cluster_YPS128_Repressed_logFC_Genes	Cluster_DNA_recombination_GO	0.494633	0.318795	0.824161	581.194	374.584	968.389	1	364	22	4802
Cluster_YPS128_Repressed_logFC_Genes	Cluster_nucleotidyltransferase_activity_GO	0.494633	0.318795	0.824161	581.194	374.584	968.389	1	364	22	4802
Cluster_YPS128_Repressed_logFC_Genes	Cluster_GTPase_activity_GO	0.494633	0.318795	0.824161	581.194	374.584	968.389	1	364	22	4802
Cluster_YPS128_Repressed_logFC_Genes	Cluster_spindle_pole_body_GO	0.494633	0.318795	0.824161	581.194	374.584	968.389	1	364	22	4802
Cluster_Y389_Repressed_logFC_Genes	Cluster_Vacuole_APGcategory	0.495637	0.17704	0.681403	582.373	208.022	800.649	5	503	54	4802
Cluster_YPS606_Repressed_logFC_Genes	Cluster_ion_transport_GO	0.495891	0.254969	0.759078	582.672	299.589	891.917	2	440	29	4802
Cluster_Y7568_Repressed_logFC_Genes	Cluster_magnesium_ion_binding_GO	0.496318	0.217107	0.720789	583.174	255.101	846.927	3	382	46	4802
Cluster_Y12_Repressed_logFC_Genes	Cluster_unfolded_protein_binding_GO	0.496355	0.218337	0.721982	583.217	256.546	848.329	3	450	39	4802
Cluster_Y2209_Repressed_logFC_Genes	Cluster_integral_to_membrane_GO	0.496967	0.098347	0.60138	583.936	115.558	706.621	18	350	256	4802
Cluster_YJM978_Repressed_logFC_Genes	Cluster_nucleocytoplasmic_transport_GO	0.496988	0.321879	0.82489	583.961	378.208	969.246	1	467	17	4802
Cluster_YJM978_Repressed_logFC_Genes	Cluster_actin_cortical_patch_GO	0.496988	0.321879	0.82489	583.961	378.208	969.246	1	467	17	4802
Cluster_YJM978_Repressed_logFC_Genes	Cluster_Peroxisome_APGcategory	0.496988	0.321879	0.82489	583.961	378.208	969.246	1	467	17	4802
Cluster_YJM1592_Repressed_logFC_Genes	Cluster_rRNA_metabolic_process_GO	0.497059	0.110819	0.613759	584.044	130.212	721.167	16	1050	76	4802
Cluster_BY4743_Repressed_logFC_Genes	Cluster_transferase_activity_GO	0.497286	0.0686669	0.571381	584.311	80.6836	671.373	46	1210	185	4802
Cluster_Y389_Repressed_logFC_Genes	Cluster_SGD-nonessentials_APGcategory	0.498212	0.0461612	0.547949	585.399	54.2394	643.84	398	503	3804	4802
Cluster_YJM1273_Repressed_logFC_Genes	Cluster_fungal-type_cell_wall_GO	0.499148	0.256485	0.757336	586.499	301.37	889.87	2	470	27	4802
Cluster_YJM1273_Repressed_logFC_Genes	Cluster_Sterols_APGcategory	0.499148	0.256485	0.757336	586.499	301.37	889.87	2	470	27	4802
Cluster_BC187_Repressed_logFC_Genes	Cluster_response_to_drug_GO	0.499252	0.194188	0.694936	586.621	228.171	816.55	4	437	51	4802
Cluster_DBVPG1373_Repressed_logFC_Genes	Cluster_transport_GO	0.49932	0.0900111	0.590691	586.701	105.763	694.062	22	404	269	4802
Cluster_BC187_Repressed_logFC_Genes	Cluster_cellular_metabolic_compound_salvage_GO	0.499762	0.218793	0.719031	587.22	257.082	844.861	3	437	40	4802
Cluster_YJM1592_Repressed_logFC_Genes	Cluster_chromosome_segregation_GO	0.500931	0.20663	0.705699	588.594	242.79	829.196	4	1050	21	4802
Cluster_YJM978_Repressed_logFC_Genes	Cluster_intracellular_protein_transmembrane_transport_GO	0.5036	0.25765	0.75405	591.73	302.739	886.009	2	467	27	4802
Cluster_YJM978_Repressed_logFC_Genes	Cluster_Induced_regulation_of_transcription_from_RNA_polymerase_II_promoter_GO	0.5036	0.25765	0.75405	591.73	302.739	886.009	2	467	27	4802
Cluster_YJM978_Repressed_logFC_Genes	Cluster_fungal-type_vacuole_membrane_GO	0.5036	0.25765	0.75405	591.73	302.739	886.009	2	467	27	4802
Cluster_Y12_Repressed_logFC_Genes	Cluster_FattyAcid_APGcategory	0.504378	0.257512	0.753134	592.644	302.577	884.932	2	450	28	4802
Cluster_Y12_Repressed_logFC_Genes	Cluster_energy_reserve_metabolic_process_GO	0.504378	0.257512	0.753134	592.644	302.577	884.932	2	450	28	4802
Cluster_Y389_Repressed_logFC_Genes	Cluster_cellular_component_GO	0.504802	0.19621	0.691408	593.142	230.547	812.404	4	503	44	4802
Cluster_Y389_Repressed_logFC_Genes	Cluster_establishment_of_cell_polarity_GO	0.50484	0.258741	0.753901	593.187	304.021	885.834	2	503	25	4802
Cluster_NCYC3290_Repressed_logFC_Genes	Cluster_Mitochondria_APGcategory	0.510435	0.182171	0.671737	599.761	214.051	789.291	5	685	39	4802
Cluster_BY4743_Repressed_logFC_Genes	Cluster_protein_complex_assembly_GO	0.510698	0.212156	0.701458	600.07	249.283	824.213	4	1210	18	4802
Cluster_NCYC3290_Repressed_logFC_Genes	Cluster_transferase_activity,_transferring_glycosyl_groups"_GO	0.512885	0.226406	0.713521	602.64	266.027	838.387	3	685	25	4802
Cluster_BY4743_Repressed_logFC_Genes	Cluster_metallopeptidase_activity_GO	0.514279	0.239194	0.724916	604.278	281.053	851.776	3	1210	14	4802
Cluster_BY4743_Repressed_logFC_Genes	Cluster_nuclear_transport_GO	0.514279	0.239194	0.724916	604.278	281.053	851.776	3	1210	14	4802
Cluster_BY4743_Repressed_logFC_Genes	Cluster_soluble_fraction_GO	0.514279	0.239194	0.724916	604.278	281.053	851.776	3	1210	14	4802
Cluster_BY4743_Repressed_logFC_Genes	Cluster_phospholipid_biosynthetic_process_GO	0.514279	0.239194	0.724916	604.278	281.053	851.776	3	1210	14	4802
Cluster_YPS606_Repressed_logFC_Genes	Cluster_DNA_replication_GO	0.514549	0.221723	0.707173	604.595	260.525	830.928	3	440	39	4802
Cluster_YPS606_Repressed_logFC_Genes	Cluster_unfolded_protein_binding_GO	0.514549	0.221723	0.707173	604.595	260.525	830.928	3	440	39	4802
Cluster_Y389_Repressed_logFC_Genes	Cluster_fungal-type_vacuole_GO	0.51645	0.223309	0.70686	606.829	262.388	830.561	3	503	34	4802
Cluster_DBVPG1373_Repressed_logFC_Genes	Cluster_vacuole_fusion,_non-autophagic"_GO	0.516575	0.328901	0.812326	606.976	386.459	954.483	1	404	19	4802
Cluster_DBVPG1373_Repressed_logFC_Genes	Cluster_nuclear_membrane_GO	0.516575	0.328901	0.812326	606.976	386.459	954.483	1	404	19	4802
Cluster_BC187_Repressed_logFC_Genes	Cluster_protein_amino_acid_phosphorylation_GO	0.517193	0.196899	0.679706	607.702	231.356	798.655	4	437	50	4802
Cluster_Y12_Repressed_logFC_Genes	Cluster_mitosis_GO	0.517224	0.22241	0.705187	607.738	261.332	828.595	3	450	38	4802
Cluster_Y12_Repressed_logFC_Genes	Cluster_nucleocytoplasmic_transport_GO	0.517422	0.330242	0.81282	607.971	388.034	955.063	1	450	17	4802
Cluster_Y12_Repressed_logFC_Genes	Cluster_replicative_cell_aging_GO	0.517422	0.330242	0.81282	607.971	388.034	955.063	1	450	17	4802
Cluster_Y12_Repressed_logFC_Genes	Cluster_actin_cortical_patch_GO	0.517422	0.330242	0.81282	607.971	388.034	955.063	1	450	17	4802
Cluster_Y12_Repressed_logFC_Genes	Cluster_regulation_of_translation_GO	0.517866	0.108405	0.590539	608.493	127.376	693.883	15	450	165	4802
Cluster_YPS128_Repressed_logFC_Genes	Cluster_cell_wall_organization_GO	0.518349	0.195834	0.677485	609.06	230.105	796.045	4	364	60	4802
Cluster_DBVPG1373_Repressed_logFC_Genes	Cluster_mitochondrial_inner_membrane_GO	0.518938	0.196578	0.67764	609.752	230.979	796.227	4	404	54	4802
Cluster_YPS128_Repressed_logFC_Genes	Cluster_response_to_DNA_damage_stimulus_GO	0.518978	0.177806	0.658828	609.799	208.922	774.123	5	364	73	4802
Cluster_Y7568_Repressed_logFC_Genes	Cluster_small_GTPase_mediated_signal_transduction_GO	0.519546	0.329651	0.810105	610.467	387.34	951.873	1	382	20	4802
Cluster_Y7568_Repressed_logFC_Genes	Cluster_Repressed_regulation_of_transposition,_RNA-mediated"_GO	0.519546	0.329651	0.810105	610.467	387.34	951.873	1	382	20	4802
Cluster_BY4743_Repressed_logFC_Genes	Cluster_ascospore_wall_assembly_GO	0.519575	0.280271	0.760695	610.501	329.318	893.817	2	1210	10	4802
Cluster_BY4743_Repressed_logFC_Genes	Cluster_cation_transport_GO	0.519575	0.280271	0.760695	610.501	329.318	893.817	2	1210	10	4802
Cluster_BY4743_Repressed_logFC_Genes	Cluster_vesicle_fusion_GO	0.519575	0.280271	0.760695	610.501	329.318	893.817	2	1210	10	4802
Cluster_BY4743_Repressed_logFC_Genes	Cluster_translational_elongation_GO	0.519575	0.280271	0.760695	610.501	329.318	893.817	2	1210	10	4802
Cluster_BY4743_Repressed_logFC_Genes	Cluster_protein_serine/threonine_phosphatase_activity_GO	0.519575	0.280271	0.760695	610.501	329.318	893.817	2	1210	10	4802
Cluster_YPS128_Repressed_logFC_Genes	Cluster_lyase_activity_GO	0.519636	0.329307	0.809671	610.572	386.936	951.363	1	364	21	4802
Cluster_YPS128_Repressed_logFC_Genes	Cluster_Purine_APGcategory	0.519636	0.329307	0.809671	610.572	386.936	951.363	1	364	21	4802
Cluster_YPS606_Repressed_logFC_Genes	Cluster_establishment_of_protein_localization_GO	0.519871	0.261364	0.741494	610.848	307.103	871.255	2	440	28	4802
Cluster_YPS128_Repressed_logFC_Genes	Cluster_Spellman_S/G2_peak	0.520423	0.153119	0.632696	611.497	179.915	743.418	7	364	99	4802
Cluster_NCYC3290_Repressed_logFC_Genes	Cluster_protein_amino_acid_N-linked_glycosylation_GO	0.520499	0.33688	0.816381	611.586	395.834	959.248	1	685	11	4802
Cluster_NCYC3290_Repressed_logFC_Genes	Cluster_peripheral_to_membrane_of_membrane_fraction_GO	0.520499	0.33688	0.816381	611.586	395.834	959.248	1	685	11	4802
Cluster_NCYC3290_Repressed_logFC_Genes	Cluster_microsome_GO	0.520499	0.33688	0.816381	611.586	395.834	959.248	1	685	11	4802
Cluster_NCYC3290_Repressed_logFC_Genes	Cluster_vacuolar_acidification_GO	0.520499	0.33688	0.816381	611.586	395.834	959.248	1	685	11	4802
Cluster_NCYC3290_Repressed_logFC_Genes	Cluster_mRNA-binding_(hnRNP)_protein_import_into_nucleus_GO	0.520499	0.33688	0.816381	611.586	395.834	959.248	1	685	11	4802
Cluster_NCYC3290_Repressed_logFC_Genes	Cluster_aminoacyl-tRNA_ligase_activity_GO	0.520499	0.33688	0.816381	611.586	395.834	959.248	1	685	11	4802
Cluster_NCYC3290_Repressed_logFC_Genes	Cluster_cytoplasmic_mRNA_processing_body_GO	0.520499	0.33688	0.816381	611.586	395.834	959.248	1	685	11	4802
Cluster_Y389_Repressed_logFC_Genes	Cluster_chromatin_silencing_at_telomere_GO	0.523721	0.334021	0.810301	615.372	392.475	952.104	1	503	15	4802
Cluster_Y389_Repressed_logFC_Genes	Cluster_peroisome_organization_GO	0.523721	0.334021	0.810301	615.372	392.475	952.104	1	503	15	4802
Cluster_Y389_Repressed_logFC_Genes	Cluster_mitochondrion_organization_GO	0.523721	0.334021	0.810301	615.372	392.475	952.104	1	503	15	4802
Cluster_YJM1592_Repressed_logFC_Genes	Cluster_endonucleolytic_cleavage_in_ITS1_to_separate_SSU-rRNA_from_5.8S_rRNA_and_LSU-rRNA_from_tricistronic_rRNA_transcript_(SSU-rRNA,_5.8S_rRNA,_LSU-rRNA)"_GO	0.523733	0.237139	0.713405	615.386	278.638	838.251	3	1050	16	4802
Cluster_YJM1592_Repressed_logFC_Genes	Cluster_cell_morphogenesis_GO	0.523733	0.237139	0.713405	615.386	278.638	838.251	3	1050	16	4802
Cluster_DBVPG1373_Repressed_logFC_Genes	Cluster_cellular_response_to_heat_GO	0.523957	0.222733	0.698777	615.649	261.711	821.063	3	404	42	4802
Cluster_Y2209_Repressed_logFC_Genes	Cluster_biopolymer_biosynthetic_process_GO	0.524236	0.196403	0.672168	615.977	230.774	789.797	4	350	62	4802
Cluster_BC187_Repressed_logFC_Genes	Cluster_energy_reserve_metabolic_process_GO	0.524556	0.262472	0.737916	616.353	308.405	867.051	2	437	28	4802
Cluster_BC187_Repressed_logFC_Genes	Cluster_tRNAprocessing_APGcategory	0.524556	0.262472	0.737916	616.353	308.405	867.051	2	437	28	4802
Cluster_YPS163_Repressed_logFC_Genes	Cluster_peroisome_GO	0.524948	0.263285	0.738337	616.814	309.36	867.546	2	470	26	4802
Cluster_YJM1273_Repressed_logFC_Genes	Cluster_ligase_activity_GO	0.52543	0.224279	0.698849	617.38	263.528	821.148	3	470	36	4802
Cluster_YPS163_Repressed_logFC_Genes	Cluster_ligase_activity_GO	0.52543	0.224279	0.698849	617.38	263.528	821.148	3	470	36	4802
Cluster_Y389_Repressed_logFC_Genes	Cluster_Golgi_membrane_GO	0.525696	0.199267	0.67357	617.693	234.139	791.445	4	503	43	4802
Cluster_YJM1592_Repressed_logFC_Genes	Cluster_aging_GO	0.525958	0.348395	0.822438	618.001	409.364	966.365	1	1050	7	4802
Cluster_YJM1592_Repressed_logFC_Genes	Cluster_Induced_regulation_of_transcription_GO	0.525958	0.348395	0.822438	618.001	409.364	966.365	1	1050	7	4802
Cluster_YJM1592_Repressed_logFC_Genes	Cluster_chromatin_silencing_GO	0.525958	0.348395	0.822438	618.001	409.364	966.365	1	1050	7	4802
Cluster_YJM1592_Repressed_logFC_Genes	Cluster_protein_amino_acid_acetylation_GO	0.525958	0.348395	0.822438	618.001	409.364	966.365	1	1050	7	4802
Cluster_YJM1592_Repressed_logFC_Genes	Cluster_fungal-type_cell_wall_organization_GO	0.525958	0.348395	0.822438	618.001	409.364	966.365	1	1050	7	4802
Cluster_YJM1592_Repressed_logFC_Genes	Cluster_histone_deacetylation_GO	0.525958	0.348395	0.822438	618.001	409.364	966.365	1	1050	7	4802
Cluster_YJM1592_Repressed_logFC_Genes	Cluster_TOR_signaling_pathway_GO	0.525958	0.348395	0.822438	618.001	409.364	966.365	1	1050	7	4802
Cluster_YJM1592_Repressed_logFC_Genes	Cluster_DNA_metabolic_process_GO	0.525958	0.348395	0.822438	618.001	409.364	966.365	1	1050	7	4802
Cluster_YJM1592_Repressed_logFC_Genes	Cluster_amino_acid_metabolic_process_GO	0.525958	0.348395	0.822438	618.001	409.364	966.365	1	1050	7	4802
Cluster_YJM1592_Repressed_logFC_Genes	Cluster_mitotic_cell_cycle_GO	0.525958	0.348395	0.822438	618.001	409.364	966.365	1	1050	7	4802
Cluster_YJM1592_Repressed_logFC_Genes	Cluster_nucleoplasm_GO	0.525958	0.348395	0.822438	618.001	409.364	966.365	1	1050	7	4802
Cluster_YJM1592_Repressed_logFC_Genes	Cluster_protein_transmembrane_transporter_activity_GO	0.525958	0.348395	0.822438	618.001	409.364	966.365	1	1050	7	4802
Cluster_YJM1592_Repressed_logFC_Genes	Cluster_histone_deacetylase_activity_GO	0.525958	0.348395	0.822438	618.001	409.364	966.365	1	1050	7	4802
Cluster_YJM1592_Repressed_logFC_Genes	Cluster_lagging_strand_elongation_GO	0.525958	0.348395	0.822438	618.001	409.364	966.365	1	1050	7	4802
Cluster_YJM1592_Repressed_logFC_Genes	Cluster_Glutathione_APGcategory	0.525958	0.348395	0.822438	618.001	409.364	966.365	1	1050	7	4802
Cluster_YJM1592_Repressed_logFC_Genes	Cluster_nuclear-transcribed_mRNA_catabolic_process,_3'-5'_eonucleolytic_nonsense-mediated_decay"_GO	0.525958	0.348395	0.822438	618.001	409.364	966.365	1	1050	7	4802
Cluster_YJM1592_Repressed_logFC_Genes	Cluster_ribosomal_small_subunit_biogenesis_GO	0.525958	0.348395	0.822438	618.001	409.364	966.365	1	1050	7	4802
Cluster_YJM1592_Repressed_logFC_Genes	Cluster_transferase_activity,_transferring_phosphorus-containing_groups"_GO	0.525958	0.348395	0.822438	618.001	409.364	966.365	1	1050	7	4802
Cluster_YJM1592_Repressed_logFC_Genes	Cluster_methionine_biosynthetic_process_GO	0.525958	0.348395	0.822438	618.001	409.364	966.365	1	1050	7	4802
Cluster_YJM1592_Repressed_logFC_Genes	Cluster_autophagic_vacuole_formation_GO	0.525958	0.348395	0.822438	618.001	409.364	966.365	1	1050	7	4802
Cluster_YJM1273_Repressed_logFC_Genes	Cluster_actin_binding_GO	0.526187	0.334285	0.808098	618.27	392.785	949.515	1	470	16	4802
Cluster_YJM1273_Repressed_logFC_Genes	Cluster_vacuolar_transport_GO	0.526187	0.334285	0.808098	618.27	392.785	949.515	1	470	16	4802
Cluster_YJM1273_Repressed_logFC_Genes	Cluster_endonucleolytic_cleavage_in_ITS1_to_separate_SSU-rRNA_from_5.8S_rRNA_and_LSU-rRNA_from_tricistronic_rRNA_transcript_(SSU-rRNA,_5.8S_rRNA,_LSU-rRNA)"_GO	0.526187	0.334285	0.808098	618.27	392.785	949.515	1	470	16	4802
Cluster_YJM1273_Repressed_logFC_Genes	Cluster_chromatin_assembly_or_disassembly_GO	0.526187	0.334285	0.808098	618.27	392.785	949.515	1	470	16	4802
Cluster_YJM1273_Repressed_logFC_Genes	Cluster_sterol_biosynthetic_process_GO	0.526187	0.334285	0.808098	618.27	392.785	949.515	1	470	16	4802
Cluster_YPS163_Repressed_logFC_Genes	Cluster_vacuolar_transport_GO	0.526187	0.334285	0.808098	618.27	392.785	949.515	1	470	16	4802
Cluster_YPS163_Repressed_logFC_Genes	Cluster_sterol_biosynthetic_process_GO	0.526187	0.334285	0.808098	618.27	392.785	949.515	1	470	16	4802
Cluster_YPS163_Repressed_logFC_Genes	Cluster_actin_cytoskeleton_organization_GO	0.526187	0.334285	0.808098	618.27	392.785	949.515	1	470	16	4802
Cluster_YPS163_Repressed_logFC_Genes	Cluster_cell_morphogenesis_GO	0.526187	0.334285	0.808098	618.27	392.785	949.515	1	470	16	4802
Cluster_YJM1273_Repressed_logFC_Genes	Cluster_magnesium_ion_binding_GO	0.526402	0.198755	0.672353	618.522	233.537	790.015	4	470	46	4802
Cluster_YPS163_Repressed_logFC_Genes	Cluster_magnesium_ion_binding_GO	0.526402	0.198755	0.672353	618.522	233.537	790.015	4	470	46	4802
Cluster_YJM1592_Repressed_logFC_Genes	Cluster_fungal-type_vacuole_GO	0.526472	0.16491	0.638438	618.605	193.769	750.165	7	1050	34	4802
Cluster_YJM1389_Repressed_logFC_Genes	Cluster_protein_complex_assembly_GO	0.526747	0.268421	0.741673	618.928	315.395	871.466	2	674	18	4802
Cluster_YJM1389_Repressed_logFC_Genes	Cluster_Mitochondria_APGcategory	0.527051	0.183984	0.656933	619.285	216.181	771.896	5	674	39	4802
Cluster_Y12_Repressed_logFC_Genes	Cluster_vesicle-mediated_transport_GO	0.527431	0.19853	0.671099	619.731	233.273	788.541	4	450	48	4802
Cluster_Y12_Repressed_logFC_Genes	Cluster_endosome_GO	0.527431	0.19853	0.671099	619.731	233.273	788.541	4	450	48	4802
Cluster_YJM1389_Repressed_logFC_Genes	Cluster_vacuolar_membrane_GO	0.527755	0.169671	0.641916	620.112	199.363	754.251	6	674	46	4802
Cluster_Y12_Repressed_logFC_Genes	Cluster_intracellular_protein_transmembrane_transport_GO	0.529136	0.263876	0.73474	621.735	310.054	863.319	2	450	27	4802
Cluster_Y12_Repressed_logFC_Genes	Cluster_fungal-type_vacuole_membrane_GO	0.529136	0.263876	0.73474	621.735	310.054	863.319	2	450	27	4802
Cluster_BY4743_Repressed_logFC_Genes	Cluster_regulation_of_cyclin-dependent_protein_kinase_activity_GO	0.529183	0.354187	0.825017	621.79	416.17	969.395	1	1210	6	4802
Cluster_BY4743_Repressed_logFC_Genes	Cluster_cyclin-dependent_protein_kinase_regulator_activity_GO	0.529183	0.354187	0.825017	621.79	416.17	969.395	1	1210	6	4802
Cluster_BY4743_Repressed_logFC_Genes	Cluster_calmodulin_binding_GO	0.529183	0.354187	0.825017	621.79	416.17	969.395	1	1210	6	4802
Cluster_BY4743_Repressed_logFC_Genes	Cluster_Elongator_holoenzyme_complex_GO	0.529183	0.354187	0.825017	621.79	416.17	969.395	1	1210	6	4802
Cluster_BY4743_Repressed_logFC_Genes	Cluster_aspartic-type_endopeptidase_activity_GO	0.529183	0.354187	0.825017	621.79	416.17	969.395	1	1210	6	4802
Cluster_BY4743_Repressed_logFC_Genes	Cluster_SCF_ubiquitin_ligase_complex_GO	0.529183	0.354187	0.825017	621.79	416.17	969.395	1	1210	6	4802
Cluster_BY4743_Repressed_logFC_Genes	Cluster_NAD_or_NADH_binding_GO	0.529183	0.354187	0.825017	621.79	416.17	969.395	1	1210	6	4802
Cluster_BY4743_Repressed_logFC_Genes	Cluster_response_to_salt_stress_GO	0.529183	0.354187	0.825017	621.79	416.17	969.395	1	1210	6	4802
Cluster_BY4743_Repressed_logFC_Genes	Cluster_transcription_initiation_from_RNA_polymerase_III_promoter_GO	0.529183	0.354187	0.825017	621.79	416.17	969.395	1	1210	6	4802
Cluster_BY4743_Repressed_logFC_Genes	Cluster_tubulin_binding_GO	0.529183	0.354187	0.825017	621.79	416.17	969.395	1	1210	6	4802
Cluster_BY4743_Repressed_logFC_Genes	Cluster_chaperone_binding_GO	0.529183	0.354187	0.825017	621.79	416.17	969.395	1	1210	6	4802
Cluster_BY4743_Repressed_logFC_Genes	Cluster_organic_acid_metabolic_process_GO	0.529183	0.354187	0.825017	621.79	416.17	969.395	1	1210	6	4802
Cluster_BY4743_Repressed_logFC_Genes	Cluster_specific_transcriptional_repressor_activity_GO	0.529183	0.354187	0.825017	621.79	416.17	969.395	1	1210	6	4802
Cluster_BY4743_Repressed_logFC_Genes	Cluster_Golgi_transport_complex_GO	0.529183	0.354187	0.825017	621.79	416.17	969.395	1	1210	6	4802
Cluster_BY4743_Repressed_logFC_Genes	Cluster_methionine_metabolic_process_GO	0.529183	0.354187	0.825017	621.79	416.17	969.395	1	1210	6	4802
Cluster_BY4743_Repressed_logFC_Genes	Cluster_cyclin-dependent_protein_kinase_holoenzyme_complex_GO	0.529183	0.354187	0.825017	621.79	416.17	969.395	1	1210	6	4802
Cluster_BY4743_Repressed_logFC_Genes	Cluster_phosphate_metabolic_process_GO	0.529183	0.354187	0.825017	621.79	416.17	969.395	1	1210	6	4802
Cluster_BY4743_Repressed_logFC_Genes	Cluster_organelle_inheritance_GO	0.529183	0.354187	0.825017	621.79	416.17	969.395	1	1210	6	4802
Cluster_BY4743_Repressed_logFC_Genes	Cluster_serine-type_endopeptidase_activity_GO	0.529183	0.354187	0.825017	621.79	416.17	969.395	1	1210	6	4802
Cluster_BY4743_Repressed_logFC_Genes	Cluster_glycogen_metabolic_process_GO	0.529183	0.354187	0.825017	621.79	416.17	969.395	1	1210	6	4802
Cluster_BY4743_Repressed_logFC_Genes	Cluster_histone_H3-K4_methylation_GO	0.529183	0.354187	0.825017	621.79	416.17	969.395	1	1210	6	4802
Cluster_YJM1389_Repressed_logFC_Genes	Cluster_peptidyl-prolyl_cis-trans_isomerase_activity_GO	0.529539	0.340444	0.810905	622.208	400.022	952.813	1	674	11	4802
Cluster_YJM1389_Repressed_logFC_Genes	Cluster_chromatin_binding_GO	0.529539	0.340444	0.810905	622.208	400.022	952.813	1	674	11	4802
Cluster_YJM1389_Repressed_logFC_Genes	Cluster_mRNA_binding_GO	0.529539	0.340444	0.810905	622.208	400.022	952.813	1	674	11	4802
Cluster_YJM1389_Repressed_logFC_Genes	Cluster_phosphoprotein_phosphatase_activity_GO	0.529539	0.340444	0.810905	622.208	400.022	952.813	1	674	11	4802
Cluster_YJM1389_Repressed_logFC_Genes	Cluster_chromosome,_telomeric_region"_GO	0.529539	0.340444	0.810905	622.208	400.022	952.813	1	674	11	4802
Cluster_YJM1389_Repressed_logFC_Genes	Cluster_GPI_anchor_biosynthetic_process_GO	0.529539	0.340444	0.810905	622.208	400.022	952.813	1	674	11	4802
Cluster_YJM1389_Repressed_logFC_Genes	Cluster_transcription_from_RNA_polymerase_I_promoter_GO	0.529539	0.340444	0.810905	622.208	400.022	952.813	1	674	11	4802
Cluster_YJM1389_Repressed_logFC_Genes	Cluster_nucleotide-excision_repair_GO	0.529539	0.340444	0.810905	622.208	400.022	952.813	1	674	11	4802
Cluster_YJM1389_Repressed_logFC_Genes	Cluster_spindle_GO	0.529539	0.340444	0.810905	622.208	400.022	952.813	1	674	11	4802
Cluster_YJM1389_Repressed_logFC_Genes	Cluster_hydrolase_activity,_acting_on_glycosyl_bonds"_GO	0.529539	0.340444	0.810905	622.208	400.022	952.813	1	674	11	4802
Cluster_YJM1389_Repressed_logFC_Genes	Cluster_Thiamine_APGcategory	0.529539	0.340444	0.810905	622.208	400.022	952.813	1	674	11	4802
Cluster_YPS606_Repressed_logFC_Genes	Cluster_phosphoinositide_binding_GO	0.529644	0.335002	0.805358	622.332	393.627	946.296	1	440	17	4802
Cluster_YPS606_Repressed_logFC_Genes	Cluster_Endocytosis_APGcategory	0.529644	0.335002	0.805358	622.332	393.627	946.296	1	440	17	4802
Cluster_YPS606_Repressed_logFC_Genes	Cluster_transcription_regulator_activity_GO	0.529644	0.335002	0.805358	622.332	393.627	946.296	1	440	17	4802
Cluster_YPS606_Repressed_logFC_Genes	Cluster_replicative_cell_aging_GO	0.529644	0.335002	0.805358	622.332	393.627	946.296	1	440	17	4802
Cluster_YPS606_Repressed_logFC_Genes	Cluster_transcription_initiation_from_RNA_polymerase_II_promoter_GO	0.529644	0.335002	0.805358	622.332	393.627	946.296	1	440	17	4802
Cluster_YPS606_Repressed_logFC_Genes	Cluster_actin_cortical_patch_GO	0.529644	0.335002	0.805358	622.332	393.627	946.296	1	440	17	4802
Cluster_YPS606_Repressed_logFC_Genes	Cluster_Peroxisome_APGcategory	0.529644	0.335002	0.805358	622.332	393.627	946.296	1	440	17	4802
Cluster_YJM978_Repressed_logFC_Genes	Cluster_actin_binding_GO	0.529667	0.335624	0.805956	622.359	394.358	946.998	1	467	16	4802
Cluster_YJM978_Repressed_logFC_Genes	Cluster_vacuolar_transport_GO	0.529667	0.335624	0.805956	622.359	394.358	946.998	1	467	16	4802
Cluster_YJM978_Repressed_logFC_Genes	Cluster_nucleus_organization_GO	0.529667	0.335624	0.805956	622.359	394.358	946.998	1	467	16	4802
Cluster_YJM978_Repressed_logFC_Genes	Cluster_peptidyl-amino_acid_modification_GO	0.530566	0.225105	0.694539	623.415	264.498	816.083	3	467	36	4802
Cluster_Y389_Repressed_logFC_Genes	Cluster_intracellular_GO	0.530951	0.112884	0.581933	623.867	132.639	683.771	14	503	137	4802
Cluster_Y12_Repressed_logFC_Genes	Cluster_RPs_APGcategory	0.531257	0.120812	0.589555	624.227	141.954	692.727	12	450	132	4802
Cluster_DBVPG1373_Repressed_logFC_Genes	Cluster_cytosolic_small_ribosomal_subunit_GO	0.531461	0.263436	0.731975	624.467	309.537	860.071	2	404	30	4802
Cluster_BC187_Repressed_logFC_Genes	Cluster_cell_wall_organization_GO	0.531586	0.180272	0.648686	624.614	211.82	762.206	5	437	60	4802
Cluster_YPS163_Repressed_logFC_Genes	Cluster_cytosol_GO	0.532334	0.138411	0.606077	625.492	162.633	712.14	9	470	96	4802
Cluster_YPS128_Repressed_logFC_Genes	Cluster_DNA_repair_GO	0.532582	0.179231	0.64665	625.784	210.596	759.814	5	364	72	4802
Cluster_Y389_Repressed_logFC_Genes	Cluster_general_RNA_polymerase_II_transcription_factor_activity_GO	0.532724	0.265926	0.733202	625.951	312.463	861.512	2	503	24	4802
Cluster_Y389_Repressed_logFC_Genes	Cluster_lipid_biosynthetic_process_GO	0.532724	0.265926	0.733202	625.951	312.463	861.512	2	503	24	4802
Cluster_BC187_Repressed_logFC_Genes	Cluster_transcription_regulator_activity_GO	0.533339	0.336405	0.803066	626.673	395.276	943.603	1	437	17	4802
Cluster_BC187_Repressed_logFC_Genes	Cluster_actin_cortical_patch_GO	0.533339	0.336405	0.803066	626.673	395.276	943.603	1	437	17	4802
Cluster_YJM978_Repressed_logFC_Genes	Cluster_oidoreductase_activity_GO	0.535667	0.166912	0.631245	629.409	196.122	741.713	6	467	66	4802
Cluster_BY4743_Repressed_logFC_Genes	Cluster_iron_ion_binding_GO	0.536056	0.143354	0.607298	629.866	168.441	713.575	10	1210	41	4802
Cluster_YJM1389_Repressed_logFC_Genes	Cluster_intracellular_GO	0.538155	0.0994291	0.561274	632.332	116.829	659.497	19	674	137	4802
Cluster_BY4743_Repressed_logFC_Genes	Cluster_endoplasmic_reticulum_membrane_GO	0.538358	0.0965084	0.558151	632.571	113.397	655.827	23	1210	92	4802
Cluster_Y389_Repressed_logFC_Genes	Cluster_signal_transduction_GO	0.540297	0.227453	0.687156	634.849	267.257	807.408	3	503	33	4802
Cluster_Y2209_Repressed_logFC_Genes	Cluster_lyase_activity_GO	0.540648	0.337274	0.796626	635.261	396.297	936.036	1	350	21	4802
Cluster_Y2209_Repressed_logFC_Genes	Cluster_sporulation_resulting_in_formation_of_a_cellular_spore_GO	0.540648	0.337274	0.796626	635.261	396.297	936.036	1	350	21	4802
Cluster_Y2209_Repressed_logFC_Genes	Cluster_Repressed_regulation_of_transcription_from_RNA_polymerase_II_promoter_GO	0.540648	0.337274	0.796626	635.261	396.297	936.036	1	350	21	4802
Cluster_YJM1389_Repressed_logFC_Genes	Cluster_regulation_of_translation_GO	0.541064	0.0908437	0.54978	635.75	106.741	645.991	23	674	165	4802
Cluster_BC187_Repressed_logFC_Genes	Cluster_metal_ion_binding_GO	0.54117	0.0975506	0.556381	635.875	114.622	653.748	19	437	211	4802
Cluster_BY4743_Repressed_logFC_Genes	Cluster_mitochondrial_outer_membrane_GO	0.542704	0.159483	0.616779	637.677	187.393	724.715	8	1210	33	4802
Cluster_DBVPG1373_Repressed_logFC_Genes	Cluster_cellular_bud_neck_GO	0.542979	0.225846	0.682867	638	265.369	802.369	3	404	41	4802
Cluster_DBVPG1373_Repressed_logFC_Genes	Cluster_nucleoside-triphosphatase_activity_GO	0.542979	0.225846	0.682867	638	265.369	802.369	3	404	41	4802
Cluster_YPS606_Repressed_logFC_Genes	Cluster_Proteasome_APGcategory	0.544381	0.267206	0.722825	639.648	313.967	849.319	2	440	27	4802
Cluster_YPS606_Repressed_logFC_Genes	Cluster_Sterols_APGcategory	0.544381	0.267206	0.722825	639.648	313.967	849.319	2	440	27	4802
Cluster_YJM1592_Repressed_logFC_Genes	Cluster_transcription_factor_activity_GO	0.544478	0.140935	0.596457	639.762	165.599	700.837	10	1050	47	4802
Cluster_YJM1592_Repressed_logFC_Genes	Cluster_response_to_stress_GO	0.544478	0.140935	0.596457	639.762	165.599	700.837	10	1050	47	4802
Cluster_DBVPG1373_Repressed_logFC_Genes	Cluster_protein_complex_assembly_GO	0.545237	0.340253	0.795016	640.653	399.797	934.144	1	404	18	4802
Cluster_YJM1592_Repressed_logFC_Genes	Cluster_ion_transport_GO	0.545266	0.178601	0.633335	640.688	209.856	744.169	6	1050	29	4802
Cluster_YPS128_Repressed_logFC_Genes	Cluster_response_to_osmotic_stress_GO	0.545399	0.339388	0.793989	640.844	398.781	932.937	1	364	20	4802
Cluster_BY4743_Repressed_logFC_Genes	Cluster_molecular_function_GO	0.545475	0.0575022	0.512027	640.933	67.5651	601.632	68	1210	269	4802
Cluster_YJM1273_Repressed_logFC_Genes	Cluster_cell_cycle_GO	0.545953	0.139054	0.593101	641.495	163.388	696.894	9	470	95	4802
Cluster_Y7568_Repressed_logFC_Genes	Cluster_lipid_metabolic_process_GO	0.546651	0.340274	0.793623	642.315	399.822	932.507	1	382	19	4802
Cluster_Y7568_Repressed_logFC_Genes	Cluster_GTPase_activator_activity_GO	0.546651	0.340274	0.793623	642.315	399.822	932.507	1	382	19	4802
Cluster_YJM1592_Repressed_logFC_Genes	Cluster_small_GTPase_mediated_signal_transduction_GO	0.547764	0.214105	0.666341	643.623	251.573	782.951	4	1050	20	4802
Cluster_YJM1592_Repressed_logFC_Genes	Cluster_incipient_cellular_bud_site_GO	0.547764	0.214105	0.666341	643.623	251.573	782.951	4	1050	20	4802
Cluster_YJM1592_Repressed_logFC_Genes	Cluster_G1/S_transition_of_mitotic_cell_cycle_GO	0.547764	0.214105	0.666341	643.623	251.573	782.951	4	1050	20	4802
Cluster_YJM1592_Repressed_logFC_Genes	Cluster_Pyrimidine_APGcategory	0.547764	0.214105	0.666341	643.623	251.573	782.951	4	1050	20	4802
Cluster_Y12_Repressed_logFC_Genes	Cluster_actin_binding_GO	0.5496	0.342994	0.793394	645.78	403.018	932.238	1	450	16	4802
Cluster_Y12_Repressed_logFC_Genes	Cluster_endonucleolytic_cleavage_in_ITS1_to_separate_SSU-rRNA_from_5.8S_rRNA_and_LSU-rRNA_from_tricistronic_rRNA_transcript_(SSU-rRNA,_5.8S_rRNA,_LSU-rRNA)"_GO	0.5496	0.342994	0.793394	645.78	403.018	932.238	1	450	16	4802
Cluster_Y12_Repressed_logFC_Genes	Cluster_nucleus_organization_GO	0.5496	0.342994	0.793394	645.78	403.018	932.238	1	450	16	4802
Cluster_Y12_Repressed_logFC_Genes	Cluster_actin_cytoskeleton_organization_GO	0.5496	0.342994	0.793394	645.78	403.018	932.238	1	450	16	4802
Cluster_YPS128_Repressed_logFC_Genes	Cluster_hydrolase_activity_GO	0.551006	0.112237	0.561231	647.432	131.878	659.446	14	364	187	4802
Cluster_BY4743_Repressed_logFC_Genes	Cluster_ER_to_Golgi_vesicle-mediated_transport_GO	0.551913	0.182744	0.63083	648.498	214.724	741.225	6	1210	25	4802
Cluster_YJM978_Repressed_logFC_Genes	Cluster_Spellman_M-G1_peak	0.553379	0.147199	0.59382	650.22	172.959	697.739	8	467	85	4802
Cluster_NCYC3290_Repressed_logFC_Genes	Cluster_replicative_cell_aging_GO	0.55466	0.275452	0.720793	651.726	323.656	846.932	2	685	17	4802
Cluster_NCYC3290_Repressed_logFC_Genes	Cluster_RNA_polymerase_II_transcription_factor_activity_GO	0.55466	0.275452	0.720793	651.726	323.656	846.932	2	685	17	4802
Cluster_NCYC3290_Repressed_logFC_Genes	Cluster_Mating_APGcategory	0.55466	0.275452	0.720793	651.726	323.656	846.932	2	685	17	4802
Cluster_YJM1592_Repressed_logFC_Genes	Cluster_peptidyl-prolyl_cis-trans_isomerase_activity_GO	0.555572	0.285665	0.730093	652.797	335.656	857.859	2	1050	11	4802
Cluster_YJM1592_Repressed_logFC_Genes	Cluster_histone_acetylation_GO	0.555572	0.285665	0.730093	652.797	335.656	857.859	2	1050	11	4802
Cluster_YJM1592_Repressed_logFC_Genes	Cluster_chromosome,_telomeric_region"_GO	0.555572	0.285665	0.730093	652.797	335.656	857.859	2	1050	11	4802
Cluster_YJM1592_Repressed_logFC_Genes	Cluster_mRNA-binding_(hnRNP)_protein_import_into_nucleus_GO	0.555572	0.285665	0.730093	652.797	335.656	857.859	2	1050	11	4802
Cluster_NCYC3290_Repressed_logFC_Genes	Cluster_Spellman_S/G2_peak	0.556682	0.115485	0.558803	654.101	135.695	656.594	14	685	99	4802
Cluster_BY4743_Repressed_logFC_Genes	Cluster_Purine_APGcategory	0.558167	0.199013	0.640846	655.846	233.84	752.994	5	1210	21	4802
Cluster_NCYC3290_Repressed_logFC_Genes	Cluster_binding_GO	0.5586	0.119684	0.561084	656.355	140.629	659.274	13	685	92	4802
Cluster_NCYC3290_Repressed_logFC_Genes	Cluster_protein_folding_GO	0.558641	0.172299	0.613659	656.403	202.451	721.049	6	685	44	4802
Cluster_NCYC3290_Repressed_logFC_Genes	Cluster_cellular_component_GO	0.558641	0.172299	0.613659	656.403	202.451	721.049	6	685	44	4802
Cluster_YJM1389_Repressed_logFC_Genes	Cluster_lipid_biosynthetic_process_GO	0.559135	0.234169	0.675034	656.984	275.149	793.165	3	674	24	4802
Cluster_YJM1273_Repressed_logFC_Genes	Cluster_endonuclease_activity_GO	0.560226	0.347431	0.787205	658.266	408.231	924.966	1	470	15	4802
Cluster_YJM1273_Repressed_logFC_Genes	Cluster_calcium_ion_binding_GO	0.560226	0.347431	0.787205	658.266	408.231	924.966	1	470	15	4802
Cluster_YJM1273_Repressed_logFC_Genes	Cluster_cell_wall_GO	0.560226	0.347431	0.787205	658.266	408.231	924.966	1	470	15	4802
Cluster_YJM1273_Repressed_logFC_Genes	Cluster_mitotic_sister_chromatid_segregation_GO	0.560226	0.347431	0.787205	658.266	408.231	924.966	1	470	15	4802
Cluster_YPS163_Repressed_logFC_Genes	Cluster_double-strand_break_repair_via_nonhomologous_end_joining_GO	0.560226	0.347431	0.787205	658.266	408.231	924.966	1	470	15	4802
Cluster_YPS163_Repressed_logFC_Genes	Cluster_protein_binding,_bridging"_GO	0.560226	0.347431	0.787205	658.266	408.231	924.966	1	470	15	4802
Cluster_YPS163_Repressed_logFC_Genes	Cluster_guanyl-nucleotide_echange_factor_activity_GO	0.560226	0.347431	0.787205	658.266	408.231	924.966	1	470	15	4802
Cluster_Y389_Repressed_logFC_Genes	Cluster_DNA-dependent_ATPase_activity_GO	0.560235	0.348268	0.788033	658.276	409.215	925.939	1	503	14	4802
Cluster_Y389_Repressed_logFC_Genes	Cluster_mitochondrial_genome_maintenance_GO	0.560235	0.348268	0.788033	658.276	409.215	925.939	1	503	14	4802
Cluster_Y389_Repressed_logFC_Genes	Cluster_nuclear_chromosome_GO	0.560235	0.348268	0.788033	658.276	409.215	925.939	1	503	14	4802
Cluster_Y389_Repressed_logFC_Genes	Cluster_soluble_fraction_GO	0.560235	0.348268	0.788033	658.276	409.215	925.939	1	503	14	4802
Cluster_Y389_Repressed_logFC_Genes	Cluster_phospholipid_biosynthetic_process_GO	0.560235	0.348268	0.788033	658.276	409.215	925.939	1	503	14	4802
Cluster_Y389_Repressed_logFC_Genes	Cluster_hydrolase_activity,_acting_on_acid_anhydrides,_in_phosphorus-containing_anhydrides"_GO	0.560235	0.348268	0.788033	658.276	409.215	925.939	1	503	14	4802
Cluster_YJM1273_Repressed_logFC_Genes	Cluster_DNA_binding_GO	0.560748	0.106252	0.545503	658.879	124.846	640.966	16	470	164	4802
Cluster_Y389_Repressed_logFC_Genes	Cluster_pseudohyphal_growth_GO	0.561271	0.272313	0.711041	659.493	319.968	835.473	2	503	23	4802
Cluster_YPS606_Repressed_logFC_Genes	Cluster_actin_binding_GO	0.561486	0.347138	0.785652	659.746	407.887	923.141	1	440	16	4802
Cluster_YPS606_Repressed_logFC_Genes	Cluster_vacuolar_transport_GO	0.561486	0.347138	0.785652	659.746	407.887	923.141	1	440	16	4802
Cluster_YPS606_Repressed_logFC_Genes	Cluster_sterol_biosynthetic_process_GO	0.561486	0.347138	0.785652	659.746	407.887	923.141	1	440	16	4802
Cluster_DBVPG1373_Repressed_logFC_Genes	Cluster_NuclearProteinTargetting_APGcategory	0.562226	0.228568	0.666342	660.616	268.567	782.952	3	404	40	4802
Cluster_YPS163_Repressed_logFC_Genes	Cluster_mitochondrial_inner_membrane_GO	0.563361	0.183549	0.620189	661.949	215.67	728.722	5	470	54	4802
Cluster_YJM978_Repressed_logFC_Genes	Cluster_double-strand_break_repair_via_nonhomologous_end_joining_GO	0.5636	0.34858	0.78498	662.23	409.582	922.351	1	467	15	4802
Cluster_YJM978_Repressed_logFC_Genes	Cluster_endonuclease_activity_GO	0.5636	0.34858	0.78498	662.23	409.582	922.351	1	467	15	4802
Cluster_YJM978_Repressed_logFC_Genes	Cluster_cellular_bud_GO	0.5636	0.34858	0.78498	662.23	409.582	922.351	1	467	15	4802
Cluster_YJM978_Repressed_logFC_Genes	Cluster_peroisome_organization_GO	0.5636	0.34858	0.78498	662.23	409.582	922.351	1	467	15	4802
Cluster_YJM978_Repressed_logFC_Genes	Cluster_transcription_from_RNA_polymerase_III_promoter_GO	0.5636	0.34858	0.78498	662.23	409.582	922.351	1	467	15	4802
Cluster_YJM978_Repressed_logFC_Genes	Cluster_nuclear_envelope_GO	0.5636	0.34858	0.78498	662.23	409.582	922.351	1	467	15	4802
Cluster_BC187_Repressed_logFC_Genes	Cluster_actin_binding_GO	0.565073	0.348351	0.783277	663.961	409.312	920.35	1	437	16	4802
Cluster_BC187_Repressed_logFC_Genes	Cluster_specific_RNA_polymerase_II_transcription_factor_activity_GO	0.565073	0.348351	0.783277	663.961	409.312	920.35	1	437	16	4802
Cluster_YPS606_Repressed_logFC_Genes	Cluster_DNA_binding_GO	0.565389	0.109339	0.54395	664.332	128.473	639.141	15	440	164	4802
Cluster_Y2209_Repressed_logFC_Genes	Cluster_rRNA_export_from_nucleus_GO	0.565937	0.346502	0.780565	664.976	407.14	917.164	1	350	20	4802
Cluster_Y2209_Repressed_logFC_Genes	Cluster_response_to_osmotic_stress_GO	0.565937	0.346502	0.780565	664.976	407.14	917.164	1	350	20	4802
Cluster_Y2209_Repressed_logFC_Genes	Cluster_cytoplasmic_vesicle_GO	0.565937	0.346502	0.780565	664.976	407.14	917.164	1	350	20	4802
Cluster_YPS163_Repressed_logFC_Genes	Cluster_protein_folding_GO	0.566011	0.203198	0.637187	665.063	238.758	748.695	4	470	44	4802
Cluster_Y7568_Repressed_logFC_Genes	Cluster_cellular_response_to_heat_GO	0.567952	0.228837	0.660885	667.344	268.883	776.54	3	382	42	4802
Cluster_Y389_Repressed_logFC_Genes	Cluster_mating_projection_tip_GO	0.568248	0.204054	0.635806	667.691	239.763	747.072	4	503	41	4802
Cluster_Y389_Repressed_logFC_Genes	Cluster_nucleoside-triphosphatase_activity_GO	0.568248	0.204054	0.635806	667.691	239.763	747.072	4	503	41	4802
Cluster_DBVPG1373_Repressed_logFC_Genes	Cluster_biological_process_GO	0.56839	0.168032	0.599642	667.858	197.438	704.579	6	404	74	4802
Cluster_YPS606_Repressed_logFC_Genes	Cluster_regulation_of_transcription_GO	0.569362	0.272394	0.703032	669	320.063	826.063	2	440	26	4802
Cluster_NCYC3290_Repressed_logFC_Genes	Cluster_snRNP_protein_import_into_nucleus_GO	0.571492	0.357247	0.785756	671.503	419.765	923.263	1	685	10	4802
Cluster_NCYC3290_Repressed_logFC_Genes	Cluster_mitochondrial_large_ribosomal_subunit_GO	0.571492	0.357247	0.785756	671.503	419.765	923.263	1	685	10	4802
Cluster_NCYC3290_Repressed_logFC_Genes	Cluster_NLS-bearing_substrate_import_into_nucleus_GO	0.571492	0.357247	0.785756	671.503	419.765	923.263	1	685	10	4802
Cluster_NCYC3290_Repressed_logFC_Genes	Cluster_RNA_elongation_GO	0.571492	0.357247	0.785756	671.503	419.765	923.263	1	685	10	4802
Cluster_NCYC3290_Repressed_logFC_Genes	Cluster_DNA-dependent_DNA_replication_GO	0.571492	0.357247	0.785756	671.503	419.765	923.263	1	685	10	4802
Cluster_NCYC3290_Repressed_logFC_Genes	Cluster_mitotic_cell_cycle_spindle_assembly_checkpoint_GO	0.571492	0.357247	0.785756	671.503	419.765	923.263	1	685	10	4802
Cluster_NCYC3290_Repressed_logFC_Genes	Cluster_nuclear_pore_organization_GO	0.571492	0.357247	0.785756	671.503	419.765	923.263	1	685	10	4802
Cluster_NCYC3290_Repressed_logFC_Genes	Cluster_snRNA_export_from_nucleus_GO	0.571492	0.357247	0.785756	671.503	419.765	923.263	1	685	10	4802
Cluster_NCYC3290_Repressed_logFC_Genes	Cluster_translational_elongation_GO	0.571492	0.357247	0.785756	671.503	419.765	923.263	1	685	10	4802
Cluster_NCYC3290_Repressed_logFC_Genes	Cluster_ribosomal_protein_import_into_nucleus_GO	0.571492	0.357247	0.785756	671.503	419.765	923.263	1	685	10	4802
Cluster_NCYC3290_Repressed_logFC_Genes	Cluster_metalloendopeptidase_activity_GO	0.571492	0.357247	0.785756	671.503	419.765	923.263	1	685	10	4802
Cluster_NCYC3290_Repressed_logFC_Genes	Cluster_DNA-directed_DNA_polymerase_activity_GO	0.571492	0.357247	0.785756	671.503	419.765	923.263	1	685	10	4802
Cluster_NCYC3290_Repressed_logFC_Genes	Cluster_protein_serine/threonine_phosphatase_activity_GO	0.571492	0.357247	0.785756	671.503	419.765	923.263	1	685	10	4802
Cluster_YJM978_Repressed_logFC_Genes	Cluster_peptidase_activity_GO	0.571645	0.203629	0.631984	671.683	239.264	742.581	4	467	44	4802
Cluster_YPS128_Repressed_logFC_Genes	Cluster_structural_molecule_activity_GO	0.571878	0.348898	0.77702	671.957	409.955	912.999	1	364	19	4802
Cluster_YPS128_Repressed_logFC_Genes	Cluster_GTPase_activator_activity_GO	0.571878	0.348898	0.77702	671.957	409.955	912.999	1	364	19	4802
Cluster_BY4743_Repressed_logFC_Genes	Cluster_intracellular_protein_transport_GO	0.572572	0.144905	0.572334	672.772	170.263	672.492	10	1210	40	4802
Cluster_BY4743_Repressed_logFC_Genes	Cluster_NuclearProteinTargetting_APGcategory	0.572572	0.144905	0.572334	672.772	170.263	672.492	10	1210	40	4802
Cluster_YJM1273_Repressed_logFC_Genes	Cluster_nucleic_acid_binding_GO	0.574466	0.147936	0.573471	674.998	173.825	673.828	8	470	83	4802
Cluster_Y7568_Repressed_logFC_Genes	Cluster_aerobic_respiration_GO	0.574546	0.35026	0.775714	675.092	411.555	911.464	1	382	18	4802
Cluster_DBVPG1373_Repressed_logFC_Genes	Cluster_Endocytosis_APGcategory	0.574791	0.350903	0.776113	675.379	412.311	911.933	1	404	17	4802
Cluster_DBVPG1373_Repressed_logFC_Genes	Cluster_bipolar_cellular_bud_site_selection_GO	0.574791	0.350903	0.776113	675.379	412.311	911.933	1	404	17	4802
Cluster_DBVPG1373_Repressed_logFC_Genes	Cluster_transcription_regulator_activity_GO	0.574791	0.350903	0.776113	675.379	412.311	911.933	1	404	17	4802
Cluster_DBVPG1373_Repressed_logFC_Genes	Cluster_replicative_cell_aging_GO	0.574791	0.350903	0.776113	675.379	412.311	911.933	1	404	17	4802
Cluster_DBVPG1373_Repressed_logFC_Genes	Cluster_RNA_polymerase_II_transcription_factor_activity_GO	0.574791	0.350903	0.776113	675.379	412.311	911.933	1	404	17	4802
Cluster_DBVPG1373_Repressed_logFC_Genes	Cluster_Peroxisome_APGcategory	0.574791	0.350903	0.776113	675.379	412.311	911.933	1	404	17	4802
Cluster_YPS163_Repressed_logFC_Genes	Cluster_response_to_DNA_damage_stimulus_GO	0.576063	0.157606	0.581543	676.874	185.187	683.313	7	470	73	4802
Cluster_YJM1389_Repressed_logFC_Genes	Cluster_peptidase_activity_GO	0.576153	0.173053	0.596899	676.98	203.337	701.356	6	674	44	4802
Cluster_YJM1389_Repressed_logFC_Genes	Cluster_cellular_component_GO	0.576153	0.173053	0.596899	676.98	203.337	701.356	6	674	44	4802
Cluster_DBVPG1373_Repressed_logFC_Genes	Cluster_FattyAcid_APGcategory	0.577058	0.272954	0.695897	678.043	320.721	817.679	2	404	28	4802
Cluster_DBVPG1373_Repressed_logFC_Genes	Cluster_establishment_of_protein_localization_GO	0.577058	0.272954	0.695897	678.043	320.721	817.679	2	404	28	4802
Cluster_YPS606_Repressed_logFC_Genes	Cluster_ligase_activity_GO	0.577372	0.231173	0.653801	678.412	271.628	768.216	3	440	36	4802
Cluster_BY4743_Repressed_logFC_Genes	Cluster_RNA_polymerase_II_transcription_mediator_activity_GO	0.577607	0.251267	0.67366	678.688	295.239	791.551	3	1210	13	4802
Cluster_YJM1592_Repressed_logFC_Genes	Cluster_endonuclease_activity_GO	0.577672	0.246614	0.668942	678.765	289.771	786.007	3	1050	15	4802
Cluster_YJM1592_Repressed_logFC_Genes	Cluster_chromatin_silencing_at_telomere_GO	0.577672	0.246614	0.668942	678.765	289.771	786.007	3	1050	15	4802
Cluster_YJM1592_Repressed_logFC_Genes	Cluster_guanyl-nucleotide_echange_factor_activity_GO	0.577672	0.246614	0.668942	678.765	289.771	786.007	3	1050	15	4802
Cluster_YJM1592_Repressed_logFC_Genes	Cluster_regulation_of_cell_cycle_GO	0.577672	0.246614	0.668942	678.765	289.771	786.007	3	1050	15	4802
Cluster_YJM1273_Repressed_logFC_Genes	Cluster_nuclear_mRNA_splicing,_via_spliceosome"_GO	0.578259	0.274789	0.69653	679.454	322.877	818.423	2	470	24	4802
Cluster_YJM1273_Repressed_logFC_Genes	Cluster_lipid_biosynthetic_process_GO	0.578259	0.274789	0.69653	679.454	322.877	818.423	2	470	24	4802
Cluster_YPS163_Repressed_logFC_Genes	Cluster_lipid_biosynthetic_process_GO	0.578259	0.274789	0.69653	679.454	322.877	818.423	2	470	24	4802
Cluster_YPS128_Repressed_logFC_Genes	Cluster_RNA_modification_GO	0.579039	0.272354	0.693316	680.371	320.016	814.646	2	364	31	4802
Cluster_YJM1389_Repressed_logFC_Genes	Cluster_protein_refolding_GO	0.580107	0.360063	0.779956	681.626	423.074	916.448	1	674	10	4802
Cluster_YJM1389_Repressed_logFC_Genes	Cluster_mitochondrial_large_ribosomal_subunit_GO	0.580107	0.360063	0.779956	681.626	423.074	916.448	1	674	10	4802
Cluster_YJM1389_Repressed_logFC_Genes	Cluster_FAD_binding_GO	0.580107	0.360063	0.779956	681.626	423.074	916.448	1	674	10	4802
Cluster_YJM1389_Repressed_logFC_Genes	Cluster_RNA_elongation_GO	0.580107	0.360063	0.779956	681.626	423.074	916.448	1	674	10	4802
Cluster_YJM1389_Repressed_logFC_Genes	Cluster_DNA-dependent_DNA_replication_GO	0.580107	0.360063	0.779956	681.626	423.074	916.448	1	674	10	4802
Cluster_YJM1389_Repressed_logFC_Genes	Cluster_ascospore_wall_assembly_GO	0.580107	0.360063	0.779956	681.626	423.074	916.448	1	674	10	4802
Cluster_YJM1389_Repressed_logFC_Genes	Cluster_cation_transport_GO	0.580107	0.360063	0.779956	681.626	423.074	916.448	1	674	10	4802
Cluster_YJM1389_Repressed_logFC_Genes	Cluster_mitotic_cell_cycle_spindle_assembly_checkpoint_GO	0.580107	0.360063	0.779956	681.626	423.074	916.448	1	674	10	4802
Cluster_YJM1389_Repressed_logFC_Genes	Cluster_snoRNA_metabolic_process_GO	0.580107	0.360063	0.779956	681.626	423.074	916.448	1	674	10	4802
Cluster_YJM1389_Repressed_logFC_Genes	Cluster_structural_constituent_of_cytoskeleton_GO	0.580107	0.360063	0.779956	681.626	423.074	916.448	1	674	10	4802
Cluster_YJM1389_Repressed_logFC_Genes	Cluster_phosphorus_metabolic_process_GO	0.580107	0.360063	0.779956	681.626	423.074	916.448	1	674	10	4802
Cluster_YJM1389_Repressed_logFC_Genes	Cluster_hydrolase_activity,_acting_on_acid_anhydrides,_catalyzing_transmembrane_movement_of_substances"_GO	0.580107	0.360063	0.779956	681.626	423.074	916.448	1	674	10	4802
Cluster_YJM1389_Repressed_logFC_Genes	Cluster_translational_elongation_GO	0.580107	0.360063	0.779956	681.626	423.074	916.448	1	674	10	4802
Cluster_YJM1389_Repressed_logFC_Genes	Cluster_DNA-directed_DNA_polymerase_activity_GO	0.580107	0.360063	0.779956	681.626	423.074	916.448	1	674	10	4802
Cluster_YJM1389_Repressed_logFC_Genes	Cluster_protein_serine/threonine_phosphatase_activity_GO	0.580107	0.360063	0.779956	681.626	423.074	916.448	1	674	10	4802
Cluster_DBVPG1373_Repressed_logFC_Genes	Cluster_Mitochondria_APGcategory	0.581663	0.230862	0.649199	683.454	271.263	762.809	3	404	39	4802
Cluster_DBVPG1373_Repressed_logFC_Genes	Cluster_unfolded_protein_binding_GO	0.581663	0.230862	0.649199	683.454	271.263	762.809	3	404	39	4802
Cluster_YJM978_Repressed_logFC_Genes	Cluster_ascospore_formation_GO	0.58245	0.275462	0.693012	684.379	323.668	814.289	2	467	24	4802
Cluster_BC187_Repressed_logFC_Genes	Cluster_peptidyl-amino_acid_modification_GO	0.582624	0.231682	0.649058	684.583	272.226	762.643	3	437	36	4802
Cluster_Y12_Repressed_logFC_Genes	Cluster_protein_binding,_bridging"_GO	0.582882	0.354839	0.771957	684.886	416.936	907.049	1	450	15	4802
Cluster_Y12_Repressed_logFC_Genes	Cluster_regulation_of_cell_cycle_GO	0.582882	0.354839	0.771957	684.886	416.936	907.049	1	450	15	4802
Cluster_Y12_Repressed_logFC_Genes	Cluster_nuclear_envelope_GO	0.582882	0.354839	0.771957	684.886	416.936	907.049	1	450	15	4802
Cluster_Y12_Repressed_logFC_Genes	Cluster_mitotic_sister_chromatid_segregation_GO	0.582882	0.354839	0.771957	684.886	416.936	907.049	1	450	15	4802
Cluster_YPS606_Repressed_logFC_Genes	Cluster_transport_GO	0.583419	0.0857178	0.502299	685.517	100.718	590.201	25	440	269	4802
Cluster_BY4743_Repressed_logFC_Genes	Cluster_mRNAprocessing_APGcategory	0.584546	0.0946849	0.510139	686.842	111.255	599.413	24	1210	94	4802
Cluster_Y7568_Repressed_logFC_Genes	Cluster_metal_ion_binding_GO	0.586321	0.102559	0.516239	688.927	120.507	606.581	17	382	211	4802
Cluster_Y7568_Repressed_logFC_Genes	Cluster_cellular_bud_neck_GO	0.58633	0.23087	0.644539	688.938	271.272	757.333	3	382	41	4802
Cluster_DBVPG1373_Repressed_logFC_Genes	Cluster_ATPase_activity_GO	0.586735	0.203515	0.61678	689.414	239.13	724.716	4	404	50	4802
Cluster_Y389_Repressed_logFC_Genes	Cluster_RNA_modification_GO	0.589015	0.233839	0.644823	692.093	274.761	757.667	3	503	31	4802
Cluster_YJM1592_Repressed_logFC_Genes	Cluster_sequence-specific_DNA_binding_GO	0.589135	0.135781	0.546646	692.234	159.543	642.309	11	1050	50	4802
Cluster_Y389_Repressed_logFC_Genes	Cluster_NuclearProteinTargetting_APGcategory	0.589803	0.205702	0.615898	693.019	241.7	723.68	4	503	40	4802
Cluster_BY4743_Repressed_logFC_Genes	Cluster_Phospholipid_APGcategory	0.59031	0.172333	0.582023	693.614	202.491	683.877	7	1210	28	4802
Cluster_Y389_Repressed_logFC_Genes	Cluster_response_to_oidative_stress_GO	0.590382	0.277744	0.687362	693.699	326.349	807.65	2	503	22	4802
Cluster_NCYC3290_Repressed_logFC_Genes	Cluster_regulation_of_transcription_from_RNA_polymerase_II_promoter_GO	0.59067	0.189315	0.598645	694.037	222.445	703.408	5	685	36	4802
Cluster_Y7568_Repressed_logFC_Genes	Cluster_GTP_binding_GO	0.5907	0.274731	0.684031	694.072	322.809	803.736	2	382	29	4802
Cluster_YJM1273_Repressed_logFC_Genes	Cluster_DNA_repair_GO	0.591525	0.157955	0.56643	695.042	185.597	665.555	7	470	72	4802
Cluster_YPS163_Repressed_logFC_Genes	Cluster_DNA_repair_GO	0.591525	0.157955	0.56643	695.042	185.597	665.555	7	470	72	4802
Cluster_YJM1592_Repressed_logFC_Genes	Cluster_nucleoside-triphosphatase_activity_GO	0.593458	0.149681	0.556223	697.313	175.875	653.562	9	1050	41	4802
Cluster_YPS606_Repressed_logFC_Genes	Cluster_double-strand_break_repair_via_nonhomologous_end_joining_GO	0.594344	0.3583	0.763956	698.354	421.002	897.648	1	440	15	4802
Cluster_YPS606_Repressed_logFC_Genes	Cluster_protein_binding,_bridging"_GO	0.594344	0.3583	0.763956	698.354	421.002	897.648	1	440	15	4802
Cluster_YPS606_Repressed_logFC_Genes	Cluster_endonuclease_activity_GO	0.594344	0.3583	0.763956	698.354	421.002	897.648	1	440	15	4802
Cluster_YPS606_Repressed_logFC_Genes	Cluster_guanyl-nucleotide_echange_factor_activity_GO	0.594344	0.3583	0.763956	698.354	421.002	897.648	1	440	15	4802
Cluster_YPS606_Repressed_logFC_Genes	Cluster_calcium_ion_binding_GO	0.594344	0.3583	0.763956	698.354	421.002	897.648	1	440	15	4802
Cluster_YPS606_Repressed_logFC_Genes	Cluster_regulation_of_cell_cycle_GO	0.594344	0.3583	0.763956	698.354	421.002	897.648	1	440	15	4802
Cluster_DBVPG1373_Repressed_logFC_Genes	Cluster_cytoplasm_GO	0.594591	0.0612227	0.466632	698.644	71.9367	548.293	52	404	607	4802
Cluster_YPS163_Repressed_logFC_Genes	Cluster_biopolymer_biosynthetic_process_GO	0.594928	0.170001	0.575073	699.04	199.751	675.711	6	470	62	4802
Cluster_NCYC3290_Repressed_logFC_Genes	Cluster_vacuolar_transport_GO	0.595118	0.283505	0.688386	699.264	333.118	808.854	2	685	16	4802
Cluster_NCYC3290_Repressed_logFC_Genes	Cluster_endonucleolytic_cleavage_in_ITS1_to_separate_SSU-rRNA_from_5.8S_rRNA_and_LSU-rRNA_from_tricistronic_rRNA_transcript_(SSU-rRNA,_5.8S_rRNA,_LSU-rRNA)"_GO	0.595118	0.283505	0.688386	699.264	333.118	808.854	2	685	16	4802
Cluster_NCYC3290_Repressed_logFC_Genes	Cluster_chromatin_assembly_or_disassembly_GO	0.595118	0.283505	0.688386	699.264	333.118	808.854	2	685	16	4802
Cluster_BY4743_Repressed_logFC_Genes	Cluster_InvasiveGrowth_APGcategory	0.595127	0.299769	0.704641	699.274	352.229	827.953	2	1210	9	4802
Cluster_BY4743_Repressed_logFC_Genes	Cluster_G2/M_transition_of_mitotic_cell_cycle_GO	0.595127	0.299769	0.704641	699.274	352.229	827.953	2	1210	9	4802
Cluster_BY4743_Repressed_logFC_Genes	Cluster_PentosePhosphate_APGcategory	0.595127	0.299769	0.704641	699.274	352.229	827.953	2	1210	9	4802
Cluster_BY4743_Repressed_logFC_Genes	Cluster_proteasome_assembly_GO	0.595127	0.299769	0.704641	699.274	352.229	827.953	2	1210	9	4802
Cluster_BY4743_Repressed_logFC_Genes	Cluster_proton-transporting_ATPase_activity,_rotational_mechanism"_GO	0.595127	0.299769	0.704641	699.274	352.229	827.953	2	1210	9	4802
Cluster_YJM1273_Repressed_logFC_Genes	Cluster_protein_catabolic_process_GO	0.595438	0.359481	0.764043	699.64	422.39	897.751	1	470	14	4802
Cluster_YJM1273_Repressed_logFC_Genes	Cluster_cellular_respiration_GO	0.595438	0.359481	0.764043	699.64	422.39	897.751	1	470	14	4802
Cluster_YJM1273_Repressed_logFC_Genes	Cluster_protein_import_into_nucleus_GO	0.595438	0.359481	0.764043	699.64	422.39	897.751	1	470	14	4802
Cluster_YJM1273_Repressed_logFC_Genes	Cluster_mitochondrial_translation_GO	0.595438	0.359481	0.764043	699.64	422.39	897.751	1	470	14	4802
[truncated: 5,647 more rows]

## Sheet: Enriched Categ. p<0.0005
Query Cluster	Comparison Cluster	pvalue Under-Rep	pvalue Exact	pvalue Over-Rep	Bonferroni pvalue Under-Rep	Bonferroni pvalue Exact	Bonferroni pvalue Over-Rep	Overlap	Cluster 1 size	Cluster2 size	Total Genes Assessed
Cluster_BC187_Induced_logFC_Genes	Cluster_GenesWithParalogs_E-100_APGcategory	1	3.72628e-08	5.0497e-08	1175	4.37838e-05	5.9334e-05	30	295	166	4802
Cluster_BC187_Induced_logFC_Genes	Cluster_SGD-nonessentials_APGcategory	0.999947	5.11961e-05	0.000104513	1174.94	0.0601554	0.122803	258	295	3804	4802
Cluster_BC187_Induced_logFC_Genes	Cluster_TATAcontaining_APGcategory	0.999892	7.93734e-05	0.000187567	1174.87	0.0932637	0.220391	79	295	888	4802
Cluster_BC187_Induced_logFC_Genes	Cluster_FAD_transport_GO	1	0.000229637	0.000233404	1175	0.269823	0.27425	3	295	3	4802
Cluster_BC187_Induced_logFC_Genes	Cluster_FAD_transmembrane_transporter_activity_GO	1	0.000229637	0.000233404	1175	0.269823	0.27425	3	295	3	4802
Cluster_BC187_Induced_logFC_Genes	Cluster_biopolymer_biosynthetic_process_GO	0.999926	0.000236256	0.000309852	1174.91	0.277601	0.364076	12	295	62	4802
Cluster_BC187_Repressed_logFC_Genes	Cluster_MitochondrialRPs_APGcategory	1	2.78607e-19	2.98561e-19	1175	3.27363e-16	3.50809e-16	31	437	54	4802
Cluster_BC187_Repressed_logFC_Genes	Cluster_SGD-nonessentials_APGcategory	1	2.10557e-14	3.01788e-14	1175	2.47404e-11	3.54601e-11	402	437	3804	4802
Cluster_BC187_Repressed_logFC_Genes	Cluster_TATAcontaining_APGcategory	1	6.50454e-10	1.26735e-09	1175	7.64283e-07	1.48914e-06	130	437	888	4802
Cluster_BC187_Repressed_logFC_Genes	Cluster_mitochondrial_large_ribosomal_subunit_GO	1	1.655e-07	1.69151e-07	1175	0.000194462	0.000198752	8	437	10	4802
Cluster_BC187_Repressed_logFC_Genes	Cluster_mitochondrial_translation_GO	0.999999	7.58857e-06	8.11167e-06	1175	0.00891657	0.00953121	8	437	14	4802
Cluster_BC187_Repressed_logFC_Genes	Cluster_GenesWithParalogs_E-100_APGcategory	0.999973	4.13779e-05	6.83883e-05	1174.97	0.048619	0.0803563	31	437	166	4802
Cluster_BC187_Repressed_logFC_Genes	Cluster_aerobic_respiration_GO	0.999991	7.5952e-05	8.50535e-05	1174.99	0.0892436	0.0999379	8	437	18	4802
Cluster_BC187_Repressed_logFC_Genes	Cluster_mitochondrion_GO	0.999815	0.00017746	0.000362337	1174.78	0.208515	0.425746	45	437	298	4802
Cluster_BY4743_Induced_logFC_Genes	Cluster_iESR_APGcategory	1	1.62051e-16	2.37768e-16	1175	1.9041e-13	2.79377e-13	115	1176	238	4802
Cluster_BY4743_Induced_logFC_Genes	Cluster_actin_cortical_patch_GO	1	7.77208e-07	8.29082e-07	1175	0.000913219	0.000974171	14	1176	17	4802
Cluster_BY4743_Induced_logFC_Genes	Cluster_SGD-nonessentials_APGcategory	0.999999	6.17049e-07	1.79249e-06	1175	0.000725033	0.00210618	987	1176	3804	4802
Cluster_BY4743_Induced_logFC_Genes	Cluster_endocytosis_GO	1	2.14042e-06	2.55812e-06	1175	0.00251499	0.00300579	20	1176	31	4802
Cluster_BY4743_Induced_logFC_Genes	Cluster_ATP_binding_GO	0.99999	1.02886e-05	2.04185e-05	1174.99	0.0120891	0.0239917	71	1176	187	4802
Cluster_BY4743_Induced_logFC_Genes	Cluster_actin_binding_GO	0.999997	2.66445e-05	2.94675e-05	1175	0.0313073	0.0346243	12	1176	16	4802
Cluster_BY4743_Induced_logFC_Genes	Cluster_hydrolase_activity_GO	0.99998	1.98144e-05	4.02328e-05	1174.98	0.0232819	0.0472735	70	1176	187	4802
Cluster_BY4743_Induced_logFC_Genes	Cluster_vacuole_GO	0.999983	3.95922e-05	5.64365e-05	1174.98	0.0465208	0.0663129	26	1176	52	4802
Cluster_BY4743_Induced_logFC_Genes	Cluster_nucleotide_binding_GO	0.999961	3.1711e-05	7.09783e-05	1174.95	0.0372604	0.0833995	84	1176	237	4802
Cluster_BY4743_Induced_logFC_Genes	Cluster_protein_binding,_bridging"_GO	0.999991	8.2112e-05	9.15962e-05	1174.99	0.0964816	0.107626	11	1176	15	4802
Cluster_BY4743_Induced_logFC_Genes	Cluster_endosome_GO	0.999968	7.63644e-05	0.000108671	1174.96	0.0897282	0.127688	24	1176	48	4802
Cluster_BY4743_Induced_logFC_Genes	Cluster_vacuolar_protein_catabolic_process_GO	0.999963	8.17127e-05	0.000118353	1174.96	0.0960124	0.139065	25	1176	51	4802
Cluster_BY4743_Induced_logFC_Genes	Cluster_ScParalogs_E-10_APGcategory	0.999879	4.13164e-05	0.000162204	1174.86	0.0485468	0.19059	342	1176	1203	4802
Cluster_BY4743_Induced_logFC_Genes	Cluster_mating_projection_tip_GO	0.999947	0.000135621	0.000188702	1174.94	0.159355	0.221725	21	1176	41	4802
Cluster_BY4743_Induced_logFC_Genes	Cluster_SRP-dependent_cotranslational_protein_targeting_to_membrane,_translocation"_GO	1	0.000213658	0.000223916	1175	0.251048	0.263101	6	1176	6	4802
Cluster_BY4743_Induced_logFC_Genes	Cluster_vacuolar_transport_GO	0.999971	0.000198812	0.000228279	1174.97	0.233604	0.268228	11	1176	16	4802
Cluster_BY4743_Induced_logFC_Genes	Cluster_helicase_activity_GO	0.999912	0.000283401	0.000371096	1174.9	0.332996	0.436038	16	1176	29	4802
Cluster_BY4743_Induced_logFC_Genes	Cluster_endopeptidase_activity_GO	0.999936	0.000319671	0.000383522	1174.92	0.375613	0.450638	12	1176	19	4802
Cluster_BY4743_Induced_logFC_Genes	Cluster_vacuolar_membrane_GO	0.999849	0.000317576	0.000468472	1174.82	0.373152	0.550455	22	1176	46	4802
Cluster_BY4743_Repressed_logFC_Genes	Cluster_rESR_APGcategory	1	9.95884e-97	1.14694e-96	1175	1.17016e-93	1.34765e-93	342	1210	520	4802
Cluster_BY4743_Repressed_logFC_Genes	Cluster_PAC_APGcategory	1	2.80837e-56	3.43359e-56	1175	3.29983e-53	4.03447e-53	244	1210	403	4802
Cluster_BY4743_Repressed_logFC_Genes	Cluster_RPs_APGcategory	1	1.82458e-48	1.92915e-48	1175	2.14388e-45	2.26675e-45	112	1210	132	4802
Cluster_BY4743_Repressed_logFC_Genes	Cluster_ESR_APGcategory	1	1.86311e-45	2.6791e-45	1175	2.18915e-42	3.14794e-42	354	1210	758	4802
Cluster_BY4743_Repressed_logFC_Genes	Cluster_rESR_RPs_APGcategory	1	2.09707e-41	2.22968e-41	1175	2.46406e-38	2.61987e-38	98	1210	117	4802
Cluster_BY4743_Repressed_logFC_Genes	Cluster_structural_constituent_of_ribosome_GO	1	2.58665e-33	2.68376e-33	1175	3.03931e-30	3.15342e-30	69	1210	77	4802
Cluster_BY4743_Repressed_logFC_Genes	Cluster_ribonucleoprotein_complex_GO	1	4.93819e-33	5.26976e-33	1175	5.80237e-30	6.19197e-30	79	1210	95	4802
Cluster_BY4743_Repressed_logFC_Genes	Cluster_MitochondrialRPs_APGcategory	1	5.58763e-26	5.73194e-26	1175	6.56547e-23	6.73503e-23	50	1210	54	4802
Cluster_BY4743_Repressed_logFC_Genes	Cluster_ribosome_GO	1	5.18265e-25	5.80344e-25	1175	6.08961e-22	6.81904e-22	73	1210	98	4802
Cluster_BY4743_Repressed_logFC_Genes	Cluster_translation_GO	1	1.31224e-23	1.61042e-23	1175	1.54188e-20	1.89224e-20	97	1210	155	4802
Cluster_BY4743_Repressed_logFC_Genes	Cluster_cytosolic_small_ribosomal_subunit_GO	1	7.64032e-17	7.72495e-17	1175	8.97738e-14	9.07682e-14	29	1210	30	4802
Cluster_BY4743_Repressed_logFC_Genes	Cluster_ribosome_biogenesis_GO	1	5.39066e-15	7.45421e-15	1175	6.33403e-12	8.7587e-12	87	1210	164	4802
Cluster_BY4743_Repressed_logFC_Genes	Cluster_Pu_Protein_complex	1	1.19513e-14	2.63129e-14	1175	1.40428e-11	3.09177e-11	341	1210	980	4802
Cluster_BY4743_Repressed_logFC_Genes	Cluster_cytosolic_large_ribosomal_subunit_GO	1	1.17862e-12	1.27187e-12	1175	1.38488e-09	1.49445e-09	30	1210	37	4802
Cluster_BY4743_Repressed_logFC_Genes	Cluster_SGDessentials_APGcategory	1	1.11084e-11	2.60643e-11	1175	1.30524e-08	3.06256e-08	298	1210	871	4802
Cluster_BY4743_Repressed_logFC_Genes	Cluster_maturation_of_SSU-rRNA_from_tricistronic_rRNA_transcript_(SSU-rRNA,_5.8S_rRNA,_LSU-rRNA)"_GO	1	5.70639e-11	5.80251e-11	1175	6.70501e-08	6.81795e-08	19	1210	20	4802
Cluster_BY4743_Repressed_logFC_Genes	Cluster_rRNAprocessing_APGcategory	1	4.12831e-10	4.56801e-10	1175	4.85076e-07	5.36741e-07	26	1210	34	4802
Cluster_BY4743_Repressed_logFC_Genes	Cluster_90S_preribosome_GO	1	3.70446e-09	4.0002e-09	1175	4.35274e-06	4.70024e-06	21	1210	26	4802
Cluster_BY4743_Repressed_logFC_Genes	Cluster_intracellular_GO	1	1.67297e-08	2.61303e-08	1175	1.96574e-05	3.07031e-05	64	1210	137	4802
Cluster_BY4743_Repressed_logFC_Genes	Cluster_small-subunit_processome_GO	1	2.94869e-08	3.11781e-08	1175	3.46471e-05	3.66343e-05	17	1210	20	4802
Cluster_BY4743_Repressed_logFC_Genes	Cluster_rRNA_processing_GO	1	3.64477e-08	4.48844e-08	1175	4.2826e-05	5.27392e-05	30	1210	48	4802
Cluster_BY4743_Repressed_logFC_Genes	Cluster_endonucleolytic_cleavage_in_ITS1_to_separate_SSU-rRNA_from_5.8S_rRNA_and_LSU-rRNA_from_tricistronic_rRNA_transcript_(SSU-rRNA,_5.8S_rRNA,_LSU-rRNA)"_GO	1	2.65494e-07	2.77534e-07	1175	0.000311955	0.000326102	14	1210	16	4802
Cluster_BY4743_Repressed_logFC_Genes	Cluster_nucleolus_GO	1	2.42437e-07	3.10442e-07	1175	0.000284863	0.000364769	30	1210	51	4802
Cluster_BY4743_Repressed_logFC_Genes	Cluster_lipid_biosynthetic_process_GO	1	3.67334e-07	4.09293e-07	1175	0.000431617	0.000480919	18	1210	24	4802
Cluster_BY4743_Repressed_logFC_Genes	Cluster_ergosterol_biosynthetic_process_GO	1	6.13073e-07	6.29185e-07	1175	0.000720361	0.000739292	12	1210	13	4802
Cluster_BY4743_Repressed_logFC_Genes	Cluster_Sterols_APGcategory	1	8.51739e-07	9.78663e-07	1175	0.00100079	0.00114993	19	1210	27	4802
Cluster_BY4743_Repressed_logFC_Genes	Cluster_mitochondrial_large_ribosomal_subunit_GO	1	1.00348e-06	1.03482e-06	1175	0.00117909	0.00121591	10	1210	10	4802
Cluster_BY4743_Repressed_logFC_Genes	Cluster_mitochondrial_translation_GO	1	3.21796e-06	3.38714e-06	1175	0.0037811	0.00397989	12	1210	14	4802
Cluster_BY4743_Repressed_logFC_Genes	Cluster_steroid_biosynthetic_process_GO	1	3.21796e-06	3.38714e-06	1175	0.0037811	0.00397989	12	1210	14	4802
Cluster_BY4743_Repressed_logFC_Genes	Cluster_RNA_binding_GO	0.999997	4.99083e-06	8.08956e-06	1175	0.00586423	0.00950523	46	1210	102	4802
Cluster_BY4743_Repressed_logFC_Genes	Cluster_endonucleolytic_cleavage_to_generate_mature_5'-end_of_SSU-rRNA_from_(SSU-rRNA,_5.8S_rRNA,_LSU-rRNA)"_GO	0.999998	3.72103e-05	3.95357e-05	1175	0.0437221	0.0464544	10	1210	12	4802
Cluster_BY4743_Repressed_logFC_Genes	Cluster_sterol_biosynthetic_process_GO	0.999996	3.61794e-05	4.01728e-05	1175	0.0425108	0.047203	12	1210	16	4802
Cluster_BY4743_Repressed_logFC_Genes	Cluster_small_ribosomal_subunit_GO	1	6.36637e-05	6.64306e-05	1175	0.0748048	0.078056	7	1210	7	4802
Cluster_BY4743_Repressed_logFC_Genes	Cluster_mitochondrial_respiratory_chain_complex_III_GO	1	6.36637e-05	6.64306e-05	1175	0.0748048	0.078056	7	1210	7	4802
Cluster_BY4743_Repressed_logFC_Genes	Cluster_mitochondrial_respiratory_chain_GO	1	6.36637e-05	6.64306e-05	1175	0.0748048	0.078056	7	1210	7	4802
Cluster_BY4743_Repressed_logFC_Genes	Cluster_ribosomal_small_subunit_assembly_and_maintenance_GO	0.999996	0.000107708	0.000111851	1175	0.126557	0.131425	8	1210	9	4802
Cluster_BY4743_Repressed_logFC_Genes	Cluster_rRNA_export_from_nucleus_GO	0.999969	0.000162595	0.00019376	1174.96	0.191049	0.227668	13	1210	20	4802
Cluster_BY4743_Repressed_logFC_Genes	Cluster_ubiquinol-cytochrome-c_reductase_activity_GO	1	0.000253597	0.000266265	1175	0.297976	0.312861	6	1210	6	4802
Cluster_BY4743_Repressed_logFC_Genes	Cluster_mitochondrial_electron_transport,_ubiquinol_to_cytochrome_c"_GO	1	0.000253597	0.000266265	1175	0.297976	0.312861	6	1210	6	4802
Cluster_BY4743_Repressed_logFC_Genes	Cluster_ribosomal_large_subunit_assembly_and_maintenance_GO	0.999984	0.000381531	0.000398117	1174.98	0.448299	0.467787	7	1210	8	4802
Cluster_BY4743_Repressed_logFC_Genes	Cluster_endonucleolytic_cleavage_in_5'-ETS_of_tricistronic_rRNA_transcript_(SSU-rRNA,_5.8S_rRNA,_LSU-rRNA)"_GO	0.999969	0.000403485	0.000434533	1174.96	0.474095	0.510576	8	1210	10	4802
Cluster_DBVPG1373_Induced_logFC_Genes	Cluster_Sterols_APGcategory	1	3.44374e-10	3.68509e-10	1175	4.04639e-07	4.32998e-07	15	402	27	4802
Cluster_DBVPG1373_Induced_logFC_Genes	Cluster_ergosterol_biosynthetic_process_GO	1	9.43979e-08	9.7856e-08	1175	0.000110918	0.000114981	9	402	13	4802
Cluster_DBVPG1373_Induced_logFC_Genes	Cluster_lipid_biosynthetic_process_GO	1	1.02769e-06	1.13564e-06	1175	0.00120754	0.00133438	11	402	24	4802
Cluster_DBVPG1373_Induced_logFC_Genes	Cluster_steroid_biosynthetic_process_GO	1	4.05964e-06	4.31346e-06	1175	0.00477008	0.00506832	8	402	14	4802
Cluster_DBVPG1373_Induced_logFC_Genes	Cluster_sterol_biosynthetic_process_GO	0.999999	1.46526e-05	1.58975e-05	1175	0.0172168	0.0186796	8	402	16	4802
Cluster_DBVPG1373_Induced_logFC_Genes	Cluster_Spellman_S_peak	0.999994	1.99585e-05	2.58977e-05	1174.99	0.0234512	0.0304298	16	402	61	4802
Cluster_DBVPG1373_Induced_logFC_Genes	Cluster_TATAcontaining_APGcategory	0.999951	3.21114e-05	8.08357e-05	1174.94	0.0377309	0.0949819	104	402	888	4802
Cluster_DBVPG1373_Repressed_logFC_Genes	Cluster_ScParalogs_E-10_APGcategory	1	5.37484e-14	9.52669e-14	1175	6.31544e-11	1.11939e-10	166	404	1203	4802
Cluster_DBVPG1373_Repressed_logFC_Genes	Cluster_TATAcontaining_APGcategory	1	5.76292e-14	9.77058e-14	1175	6.77143e-11	1.14804e-10	134	404	888	4802
Cluster_DBVPG1373_Repressed_logFC_Genes	Cluster_GenesWithParalogs_E-100_APGcategory	1	1.0939e-12	1.41344e-12	1175	1.28533e-09	1.66079e-09	44	404	166	4802
Cluster_DBVPG1373_Repressed_logFC_Genes	Cluster_oidoreductase_activity_GO	1	6.00586e-09	7.19837e-09	1175	7.05689e-06	8.45808e-06	22	404	66	4802
Cluster_DBVPG1373_Repressed_logFC_Genes	Cluster_oidation_reduction_GO	1	6.80577e-09	8.26451e-09	1175	7.99678e-06	9.7108e-06	23	404	72	4802
Cluster_DBVPG1373_Repressed_logFC_Genes	Cluster_metabolic_process_GO	1	4.34568e-07	5.7567e-07	1175	0.000510617	0.000676412	24	404	95	4802
Cluster_DBVPG1373_Repressed_logFC_Genes	Cluster_amino_acid_biosynthetic_process_GO	1	3.69741e-06	4.09157e-06	1175	0.00434446	0.00480759	10	404	22	4802
Cluster_DBVPG1373_Repressed_logFC_Genes	Cluster_maltose_metabolic_process_GO	1	4.12013e-06	4.18323e-06	1175	0.00484115	0.0049153	5	404	5	4802
Cluster_DBVPG1373_Repressed_logFC_Genes	Cluster_Spellman_G2-M_peak	0.999998	3.34186e-06	5.06075e-06	1175	0.00392669	0.00594638	31	404	158	4802
Cluster_DBVPG1373_Repressed_logFC_Genes	Cluster_SGD-nonessentials_APGcategory	0.999978	1.81841e-05	4.02134e-05	1174.97	0.0213663	0.0472507	350	404	3804	4802
Cluster_DBVPG1373_Repressed_logFC_Genes	Cluster_tricarboylic_acid_cycle_GO	0.999998	7.27265e-05	7.49551e-05	1175	0.0854536	0.0880722	5	404	7	4802
Cluster_DBVPG1373_Repressed_logFC_Genes	Cluster_catalytic_activity_GO	0.999972	5.06669e-05	7.84722e-05	1174.97	0.0595336	0.0922048	25	404	132	4802
Cluster_DBVPG1373_Repressed_logFC_Genes	Cluster_cellular_aromatic_compound_metabolic_process_GO	0.999986	0.000105277	0.000119312	1174.98	0.1237	0.140192	8	404	20	4802
Cluster_DBVPG1373_Repressed_logFC_Genes	Cluster_Lysine_APGcategory	0.999992	0.0001778	0.00018608	1174.99	0.208915	0.218644	5	404	8	4802
Cluster_DBVPG1373_Repressed_logFC_Genes	Cluster_biopolymer_biosynthetic_process_GO	0.999866	0.000348361	0.000482607	1174.84	0.409324	0.567063	14	404	62	4802
Cluster_NCYC3290_Induced_logFC_Genes	Cluster_nucleus_GO	1	2.1103e-10	4.04814e-10	1175	2.4796e-07	4.75656e-07	128	636	584	4802
Cluster_NCYC3290_Induced_logFC_Genes	Cluster_transcription_GO	1	8.24685e-10	1.21056e-09	1175	9.69005e-07	1.42241e-06	53	636	174	4802
Cluster_NCYC3290_Induced_logFC_Genes	Cluster_regulation_of_transcription,_DNA-dependent"_GO	1	4.64904e-09	6.8641e-09	1175	5.46262e-06	8.06532e-06	49	636	162	4802
Cluster_NCYC3290_Induced_logFC_Genes	Cluster_Sterols_APGcategory	1	1.47817e-06	1.69376e-06	1175	0.00173685	0.00199017	14	636	27	4802
Cluster_NCYC3290_Induced_logFC_Genes	Cluster_chromatin_modification_GO	1	1.61514e-06	1.98101e-06	1175	0.00189779	0.00232769	18	636	42	4802
Cluster_NCYC3290_Induced_logFC_Genes	Cluster_DNA_binding_GO	0.999998	2.73319e-06	4.51803e-06	1175	0.0032115	0.00530869	43	636	164	4802
Cluster_NCYC3290_Induced_logFC_Genes	Cluster_ergosterol_biosynthetic_process_GO	1	4.87025e-06	5.17599e-06	1175	0.00572254	0.00608179	9	636	13	4802
Cluster_NCYC3290_Induced_logFC_Genes	Cluster_sterol_biosynthetic_process_GO	1	5.39602e-06	5.86785e-06	1175	0.00634032	0.00689472	10	636	16	4802
Cluster_NCYC3290_Induced_logFC_Genes	Cluster_steroid_biosynthetic_process_GO	0.999999	1.18513e-05	1.27947e-05	1175	0.0139253	0.0150338	9	636	14	4802
Cluster_NCYC3290_Induced_logFC_Genes	Cluster_general_RNA_polymerase_II_transcription_factor_activity_GO	0.999998	1.34521e-05	1.55605e-05	1175	0.0158062	0.0182836	12	636	24	4802
Cluster_NCYC3290_Induced_logFC_Genes	Cluster_nucleolus_GO	0.999988	3.64029e-05	4.87306e-05	1174.99	0.0427734	0.0572585	18	636	51	4802
Cluster_NCYC3290_Induced_logFC_Genes	Cluster_specific_RNA_polymerase_II_transcription_factor_activity_GO	0.999994	5.11448e-05	5.70127e-05	1174.99	0.0600951	0.0669899	9	636	16	4802
Cluster_NCYC3290_Induced_logFC_Genes	Cluster_transcription_initiation_from_RNA_polymerase_II_promoter_GO	0.999987	9.44445e-05	0.000107013	1174.98	0.110972	0.12574	9	636	17	4802
Cluster_NCYC3290_Induced_logFC_Genes	Cluster_transcription_factor_TFIID_complex_GO	0.999972	0.000272269	0.00029979	1174.97	0.319916	0.352253	7	636	12	4802
Cluster_NCYC3290_Induced_logFC_Genes	Cluster_regulation_of_transcription_during_G1_phase_of_mitotic_cell_cycle_GO	0.99998	0.000291107	0.000310708	1174.98	0.342051	0.365082	6	636	9	4802
Cluster_NCYC3290_Repressed_logFC_Genes	Cluster_RPs_APGcategory	1	9.18679e-16	1.15674e-15	1175	1.07945e-12	1.35917e-12	56	685	132	4802
Cluster_NCYC3290_Repressed_logFC_Genes	Cluster_ScParalogs_E-10_APGcategory	1	1.56098e-15	3.06805e-15	1175	1.83415e-12	3.60496e-12	257	685	1203	4802
Cluster_NCYC3290_Repressed_logFC_Genes	Cluster_TATAcontaining_APGcategory	1	2.23048e-15	4.16077e-15	1175	2.62081e-12	4.8889e-12	204	685	888	4802
Cluster_NCYC3290_Repressed_logFC_Genes	Cluster_rESR_RPs_APGcategory	1	1.11546e-13	1.41477e-13	1175	1.31067e-10	1.66235e-10	49	685	117	4802
Cluster_NCYC3290_Repressed_logFC_Genes	Cluster_GenesWithParalogs_E-100_APGcategory	1	5.61566e-12	7.83415e-12	1175	6.5984e-09	9.20513e-09	58	685	166	4802
Cluster_NCYC3290_Repressed_logFC_Genes	Cluster_structural_constituent_of_ribosome_GO	1	1.23138e-10	1.52754e-10	1175	1.44687e-07	1.79486e-07	34	685	77	4802
Cluster_NCYC3290_Repressed_logFC_Genes	Cluster_translation_GO	1	3.73664e-09	5.50533e-09	1175	4.39055e-06	6.46876e-06	50	685	155	4802
Cluster_NCYC3290_Repressed_logFC_Genes	Cluster_cytosolic_small_ribosomal_subunit_GO	1	5.97307e-08	6.75404e-08	1175	7.01836e-05	7.936e-05	17	685	30	4802
Cluster_NCYC3290_Repressed_logFC_Genes	Cluster_ribosome_GO	1	4.93508e-08	6.8162e-08	1175	5.79872e-05	8.00903e-05	35	685	98	4802
Cluster_NCYC3290_Repressed_logFC_Genes	Cluster_tricarboylic_acid_cycle_GO	1	1.17064e-06	1.19518e-06	1175	0.0013755	0.00140434	7	685	7	4802
Cluster_NCYC3290_Repressed_logFC_Genes	Cluster_ribonucleoprotein_complex_GO	0.999999	2.475e-06	3.61831e-06	1175	0.00290813	0.00425151	31	685	95	4802
Cluster_NCYC3290_Repressed_logFC_Genes	Cluster_oidoreductase_activity_GO	0.999998	4.14311e-06	5.64858e-06	1175	0.00486815	0.00663708	24	685	66	4802
Cluster_NCYC3290_Repressed_logFC_Genes	Cluster_oidation_reduction_GO	0.999997	6.67112e-06	9.34953e-06	1175	0.00783857	0.0109857	25	685	72	4802
Cluster_NCYC3290_Repressed_logFC_Genes	Cluster_cytosolic_large_ribosomal_subunit_GO	0.999997	1.36753e-05	1.70283e-05	1175	0.0160685	0.0200083	16	685	37	4802
Cluster_NCYC3290_Repressed_logFC_Genes	Cluster_Proteasome_APGcategory	0.999996	2.21026e-05	2.63044e-05	1175	0.0259706	0.0309077	13	685	27	4802
Cluster_NCYC3290_Repressed_logFC_Genes	Cluster_maltose_metabolic_process_GO	1	5.83301e-05	5.9974e-05	1175	0.0685379	0.0704695	5	685	5	4802
Cluster_NCYC3290_Repressed_logFC_Genes	Cluster_amino_acid_biosynthetic_process_GO	0.999989	6.16907e-05	7.22751e-05	1174.99	0.0724866	0.0849232	11	685	22	4802
Cluster_NCYC3290_Repressed_logFC_Genes	Cluster_Spellman_G2-M_peak	0.99994	7.30746e-05	0.00013337	1174.93	0.0858627	0.15671	40	685	158	4802
Cluster_NCYC3290_Repressed_logFC_Genes	Cluster_Lysine_APGcategory	0.999992	0.0001706	0.000178809	1174.99	0.200455	0.210101	6	685	8	4802
Cluster_NCYC3290_Repressed_logFC_Genes	Cluster_proteasome_core_complex,_beta-subunit_complex"_GO	1	0.000410966	0.000424941	1175	0.482885	0.499306	4	685	4	4802
Cluster_NCYC3290_Repressed_logFC_Genes	Cluster_succinate_dehydrogenase_(ubiquinone)_activity_GO	1	0.000410966	0.000424941	1175	0.482885	0.499306	4	685	4	4802
Cluster_NCYC3290_Repressed_logFC_Genes	Cluster_mitochondrial_respiratory_chain_complex_II_GO	1	0.000410966	0.000424941	1175	0.482885	0.499306	4	685	4	4802
Cluster_NCYC3290_Repressed_logFC_Genes	Cluster_mitochondrial_electron_transport,_succinate_to_ubiquinone"_GO	1	0.000410966	0.000424941	1175	0.482885	0.499306	4	685	4	4802
Cluster_Y12_Induced_logFC_Genes	Cluster_SGD-nonessentials_APGcategory	1	3.7447e-16	5.25584e-16	1175	4.40002e-13	6.17561e-13	432	468	3804	4802
Cluster_Y12_Induced_logFC_Genes	Cluster_MitochondrialRPs_APGcategory	1	1.21281e-09	1.41433e-09	1175	1.42505e-06	1.66184e-06	22	468	54	4802
Cluster_Y12_Induced_logFC_Genes	Cluster_mitochondrial_matri_GO	1	1.2734e-06	1.50669e-06	1175	0.00149624	0.00177036	15	468	39	4802
Cluster_Y12_Induced_logFC_Genes	Cluster_maltose_metabolic_process_GO	1	8.62409e-06	8.77998e-06	1175	0.0101333	0.0103165	5	468	5	4802
Cluster_Y12_Induced_logFC_Genes	Cluster_TATAcontaining_APGcategory	0.999993	4.97267e-06	1.22293e-05	1174.99	0.00584289	0.0143694	122	468	888	4802
Cluster_Y12_Induced_logFC_Genes	Cluster_iESR_APGcategory	0.999964	4.21676e-05	7.78003e-05	1174.96	0.0495469	0.0914154	42	468	238	4802
Cluster_Y12_Induced_logFC_Genes	Cluster_metabolic_process_GO	0.999974	5.49735e-05	8.128e-05	1174.97	0.0645939	0.095504	22	468	95	4802
Cluster_Y12_Induced_logFC_Genes	Cluster_metalloendopeptidase_activity_GO	0.999993	0.000116553	0.000123948	1174.99	0.13695	0.145639	6	468	10	4802
Cluster_Y12_Induced_logFC_Genes	Cluster_metallopeptidase_activity_GO	0.999986	0.000135561	0.00014914	1174.98	0.159284	0.175239	7	468	14	4802
Cluster_Y12_Induced_logFC_Genes	Cluster_mitochondrial_translation_GO	0.999986	0.000135561	0.00014914	1174.98	0.159284	0.175239	7	468	14	4802
Cluster_Y12_Induced_logFC_Genes	Cluster_Thiamine_APGcategory	0.999981	0.000231696	0.000250328	1174.98	0.272243	0.294135	6	468	11	4802
Cluster_Y12_Induced_logFC_Genes	Cluster_response_to_arsenic_GO	0.99998	0.000356148	0.000375768	1174.98	0.418474	0.441527	5	468	8	4802
Cluster_Y12_Induced_logFC_Genes	Cluster_cellular_aldehyde_metabolic_process_GO	0.999991	0.000402768	0.000411547	1174.99	0.473252	0.483568	4	468	5	4802
Cluster_Y12_Repressed_logFC_Genes	Cluster_TATAcontaining_APGcategory	1	2.15412e-17	3.50044e-17	1175	2.53109e-14	4.11302e-14	154	450	888	4802
Cluster_Y12_Repressed_logFC_Genes	Cluster_ScParalogs_E-10_APGcategory	1	4.86382e-17	8.3026e-17	1175	5.71499e-14	9.75555e-14	189	450	1203	4802
Cluster_Y12_Repressed_logFC_Genes	Cluster_GenesWithParalogs_E-100_APGcategory	1	1.15202e-11	1.53425e-11	1175	1.35362e-08	1.80274e-08	45	450	166	4802
Cluster_Y12_Repressed_logFC_Genes	Cluster_Spellman_G2-M_peak	1	2.93271e-11	3.90151e-11	1175	3.44593e-08	4.58427e-08	43	450	158	4802
Cluster_Y12_Repressed_logFC_Genes	Cluster_Lysine_APGcategory	1	1.51472e-05	1.55945e-05	1175	0.017798	0.0183235	6	450	8	4802
Cluster_Y12_Repressed_logFC_Genes	Cluster_integral_to_membrane_GO	0.999983	2.11721e-05	3.86073e-05	1174.98	0.0248772	0.0453636	44	450	256	4802
Cluster_Y12_Repressed_logFC_Genes	Cluster_SGD-nonessentials_APGcategory	0.999977	1.75255e-05	4.04523e-05	1174.97	0.0205925	0.0475315	388	450	3804	4802
Cluster_Y12_Repressed_logFC_Genes	Cluster_cell_redo_homeostasis_GO	0.99999	0.000105858	0.000115973	1174.99	0.124383	0.136268	7	450	14	4802
Cluster_Y2209_Induced_logFC_Genes	Cluster_TATAcontaining_APGcategory	1	1.95051e-07	3.9242e-07	1175	0.000229185	0.000461093	97	330	888	4802
Cluster_Y2209_Induced_logFC_Genes	Cluster_Arginine_APGcategory	1	4.17511e-07	4.34717e-07	1175	0.000490575	0.000510792	8	330	13	4802
Cluster_Y2209_Induced_logFC_Genes	Cluster_MitochondrialRPs_APGcategory	1	1.60397e-06	1.93302e-06	1175	0.00188466	0.0022713	15	330	54	4802
Cluster_Y2209_Induced_logFC_Genes	Cluster_mitochondrial_translation_GO	0.999985	0.000173145	0.000188458	1174.98	0.203445	0.221438	6	330	14	4802
Cluster_Y2209_Induced_logFC_Genes	Cluster_mitochondrion_GO	0.999887	0.000129554	0.000242244	1174.87	0.152226	0.284637	37	330	298	4802
Cluster_Y2209_Induced_logFC_Genes	Cluster_mitochondrial_large_ribosomal_subunit_GO	0.999983	0.000264325	0.000281029	1174.98	0.310582	0.330209	5	330	10	4802
Cluster_Y2209_Repressed_logFC_Genes	Cluster_TATAcontaining_APGcategory	1	4.91253e-10	8.97102e-10	1175	5.77222e-07	1.05409e-06	110	350	888	4802
Cluster_Y2209_Repressed_logFC_Genes	Cluster_SGD-nonessentials_APGcategory	1	5.09505e-09	8.21704e-09	1175	5.98668e-06	9.65502e-06	316	350	3804	4802
Cluster_Y2209_Repressed_logFC_Genes	Cluster_ScParalogs_E-10_APGcategory	1	8.61697e-09	1.74275e-08	1175	1.01249e-05	2.04773e-05	133	350	1203	4802
Cluster_Y2209_Repressed_logFC_Genes	Cluster_GenesWithParalogs_E-100_APGcategory	1	4.47761e-08	6.24308e-08	1175	5.26119e-05	7.33562e-05	33	350	166	4802
Cluster_Y2209_Repressed_logFC_Genes	Cluster_iESR_APGcategory	0.999998	3.71343e-06	6.00585e-06	1175	0.00436328	0.00705687	37	350	238	4802
Cluster_Y2209_Repressed_logFC_Genes	Cluster_Spellman_G2-M_peak	0.999993	1.37155e-05	2.08428e-05	1174.99	0.0161157	0.0244903	27	350	158	4802
Cluster_Y389_Induced_logFC_Genes	Cluster_SGD-nonessentials_APGcategory	1	1.21428e-14	1.89694e-14	1175	1.42678e-11	2.2289e-11	515	569	3804	4802
Cluster_Y389_Induced_logFC_Genes	Cluster_TATAcontaining_APGcategory	1	5.43581e-12	1.05871e-11	1175	6.38708e-09	1.24398e-08	167	569	888	4802
Cluster_Y389_Induced_logFC_Genes	Cluster_iESR_APGcategory	1	4.03872e-08	6.60292e-08	1175	4.7455e-05	7.75843e-05	57	569	238	4802
Cluster_Y389_Induced_logFC_Genes	Cluster_Lysine_APGcategory	1	2.24177e-06	2.27953e-06	1175	0.00263408	0.00267845	7	569	8	4802
Cluster_Y389_Induced_logFC_Genes	Cluster_oidation_reduction_GO	0.999996	1.15668e-05	1.60144e-05	1175	0.013591	0.0188169	22	569	72	4802
Cluster_Y389_Induced_logFC_Genes	Cluster_mitochondrion_GO	0.999985	1.50882e-05	3.00457e-05	1174.98	0.0177286	0.0353037	59	569	298	4802
Cluster_Y389_Induced_logFC_Genes	Cluster_GenesWithParalogs_E-100_APGcategory	0.999986	1.9989e-05	3.41513e-05	1174.98	0.0234871	0.0401278	38	569	166	4802
Cluster_Y389_Induced_logFC_Genes	Cluster_oidoreductase_activity_GO	0.999988	3.19882e-05	4.44277e-05	1174.99	0.0375861	0.0522025	20	569	66	4802
Cluster_Y389_Induced_logFC_Genes	Cluster_ScParalogs_E-10_APGcategory	0.999936	3.12404e-05	9.53861e-05	1174.92	0.0367075	0.112079	180	569	1203	4802
Cluster_Y389_Induced_logFC_Genes	Cluster_integral_to_membrane_GO	0.999822	0.000164188	0.000342413	1174.79	0.192921	0.402335	49	569	256	4802
Cluster_Y389_Induced_logFC_Genes	Cluster_tricarboylic_acid_cycle_GO	0.999983	0.000376068	0.000393097	1174.98	0.44188	0.461889	5	569	7	4802
Cluster_Y389_Repressed_logFC_Genes	Cluster_Spellman_G2-M_peak	1	1.48368e-12	1.95585e-12	1175	1.74332e-09	2.29812e-09	48	503	158	4802
Cluster_Y389_Repressed_logFC_Genes	Cluster_ScParalogs_E-10_APGcategory	1	1.28635e-08	2.93252e-08	1175	1.51146e-05	3.44571e-05	178	503	1203	4802
Cluster_Y389_Repressed_logFC_Genes	Cluster_GenesWithParalogs_E-100_APGcategory	1	1.5011e-07	2.25838e-07	1175	0.000176379	0.00026536	40	503	166	4802
Cluster_Y389_Repressed_logFC_Genes	Cluster_PAC_APGcategory	1	2.17627e-07	4.07943e-07	1175	0.000255712	0.000479333	74	503	403	4802
Cluster_Y389_Repressed_logFC_Genes	Cluster_Leucine_APGcategory	1	1.23872e-05	1.26303e-05	1175	0.014555	0.0148406	5	503	5	4802
Cluster_Y389_Repressed_logFC_Genes	Cluster_rESR_APGcategory	0.999951	3.6344e-05	8.50814e-05	1174.94	0.0427042	0.0999706	81	503	520	4802
Cluster_Y389_Repressed_logFC_Genes	Cluster_vacuolar_transporter_chaperone_complex_GO	1	0.000119106	0.000121925	1175	0.13995	0.143262	4	503	4	4802
Cluster_Y389_Repressed_logFC_Genes	Cluster_nucleolus_GO	0.999964	0.000108689	0.000145012	1174.96	0.12771	0.170389	15	503	51	4802
Cluster_Y7568_Induced_logFC_Genes	Cluster_MitochondrialRPs_APGcategory	1	2.13359e-12	2.37987e-12	1175	2.50697e-09	2.79635e-09	23	378	54	4802
Cluster_Y7568_Induced_logFC_Genes	Cluster_Arginine_APGcategory	1	5.5119e-08	5.70015e-08	1175	6.47648e-05	6.69768e-05	9	378	13	4802
Cluster_Y7568_Induced_logFC_Genes	Cluster_mitochondrial_large_ribosomal_subunit_GO	0.999998	3.48638e-05	3.65938e-05	1175	0.040965	0.0429977	6	378	10	4802
Cluster_Y7568_Induced_logFC_Genes	Cluster_mitochondrial_translation_GO	0.999997	3.47291e-05	3.74295e-05	1175	0.0408067	0.0439797	7	378	14	4802
Cluster_Y7568_Induced_logFC_Genes	Cluster_Flavin_APGcategory	0.999997	0.000174434	0.000177425	1175	0.20496	0.208474	4	378	5	4802
Cluster_Y7568_Induced_logFC_Genes	Cluster_TATAcontaining_APGcategory	0.999879	7.71392e-05	0.000198016	1174.86	0.0906386	0.232669	97	378	888	4802
Cluster_Y7568_Induced_logFC_Genes	Cluster_tRNAsynth_APGcategory	0.999942	0.000281535	0.000339716	1174.93	0.330804	0.399166	9	378	30	4802
Cluster_Y7568_Induced_logFC_Genes	Cluster_proteolysis_GO	0.999865	0.000347225	0.000482194	1174.84	0.407989	0.566578	14	378	66	4802
Cluster_Y7568_Repressed_logFC_Genes	Cluster_ScParalogs_E-10_APGcategory	1	5.0307e-10	9.91477e-10	1175	5.91107e-07	1.16499e-06	147	382	1203	4802
Cluster_Y7568_Repressed_logFC_Genes	Cluster_TATAcontaining_APGcategory	1	3.22293e-09	6.2183e-09	1175	3.78694e-06	7.3065e-06	115	382	888	4802
Cluster_Y7568_Repressed_logFC_Genes	Cluster_SGD-nonessentials_APGcategory	1	5.41293e-09	9.03475e-09	1175	6.36019e-06	1.06158e-05	343	382	3804	4802
Cluster_Y7568_Repressed_logFC_Genes	Cluster_GenesWithParalogs_E-100_APGcategory	1	9.94896e-09	1.38067e-08	1175	1.169e-05	1.62229e-05	36	382	166	4802
Cluster_Y7568_Repressed_logFC_Genes	Cluster_Spellman_G2-M_peak	0.999987	2.35928e-05	3.69364e-05	1174.98	0.0277215	0.0434003	28	382	158	4802
Cluster_Y7568_Repressed_logFC_Genes	Cluster_iESR_APGcategory	0.999899	0.000122471	0.000223334	1174.88	0.143903	0.262417	35	382	238	4802
Cluster_YJM1273_Induced_logFC_Genes	Cluster_rESR_APGcategory	1	7.80139e-93	8.5836e-93	1175	9.16663e-90	1.00857e-89	206	449	520	4802
Cluster_YJM1273_Induced_logFC_Genes	Cluster_RPs_APGcategory	1	2.7729e-85	2.83309e-85	1175	3.25816e-82	3.32888e-82	104	449	132	4802
Cluster_YJM1273_Induced_logFC_Genes	Cluster_rESR_RPs_APGcategory	1	5.77591e-80	5.88601e-80	1175	6.78669e-77	6.91606e-77	95	449	117	4802
Cluster_YJM1273_Induced_logFC_Genes	Cluster_ESR_APGcategory	1	6.58381e-59	7.9151e-59	1175	7.73598e-56	9.30024e-56	207	449	758	4802
Cluster_YJM1273_Induced_logFC_Genes	Cluster_translation_GO	1	6.06782e-37	6.70111e-37	1175	7.12969e-34	7.8738e-34	74	449	155	4802
Cluster_YJM1273_Induced_logFC_Genes	Cluster_structural_constituent_of_ribosome_GO	1	5.25418e-35	5.50666e-35	1175	6.17366e-32	6.47033e-32	51	449	77	4802
Cluster_YJM1273_Induced_logFC_Genes	Cluster_ribosome_GO	1	2.19766e-33	2.35535e-33	1175	2.58225e-30	2.76754e-30	56	449	98	4802
Cluster_YJM1273_Induced_logFC_Genes	Cluster_ribonucleoprotein_complex_GO	1	9.06563e-30	9.79487e-30	1175	1.06521e-26	1.1509e-26	52	449	95	4802
Cluster_YJM1273_Induced_logFC_Genes	Cluster_ScParalogs_E-10_APGcategory	1	1.55407e-29	2.25277e-29	1175	1.82603e-26	2.647e-26	217	449	1203	4802
Cluster_YJM1273_Induced_logFC_Genes	Cluster_PAC_APGcategory	1	5.23563e-29	6.67835e-29	1175	6.15187e-26	7.84706e-26	111	449	403	4802
Cluster_YJM1273_Induced_logFC_Genes	Cluster_cytosolic_large_ribosomal_subunit_GO	1	3.78164e-22	3.89835e-22	1175	4.44343e-19	4.58056e-19	28	449	37	4802
Cluster_YJM1273_Induced_logFC_Genes	Cluster_cytosolic_small_ribosomal_subunit_GO	1	3.83515e-20	3.92683e-20	1175	4.5063e-17	4.61403e-17	24	449	30	4802
Cluster_YJM1273_Induced_logFC_Genes	Cluster_intracellular_GO	1	9.31544e-19	1.10705e-18	1175	1.09456e-15	1.30078e-15	50	449	137	4802
Cluster_YJM1273_Induced_logFC_Genes	Cluster_cytoplasm_GO	1	1.44887e-11	2.49229e-11	1175	1.70242e-08	2.92844e-08	105	449	607	4802
Cluster_YJM1273_Induced_logFC_Genes	Cluster_Pu_Protein_complex	1	1.22591e-09	2.48059e-09	1175	1.44044e-06	2.91469e-06	142	449	980	4802
Cluster_YJM1273_Induced_logFC_Genes	Cluster_small_ribosomal_subunit_GO	1	5.98768e-08	6.06452e-08	1175	7.03552e-05	7.12581e-05	7	449	7	4802
Cluster_YJM1273_Induced_logFC_Genes	Cluster_GenesWithParalogs_E-100_APGcategory	1	6.58168e-08	9.59792e-08	1175	7.73347e-05	0.000112776	38	449	166	4802
Cluster_YJM1273_Induced_logFC_Genes	Cluster_maturation_of_SSU-rRNA_from_tricistronic_rRNA_transcript_(SSU-rRNA,_5.8S_rRNA,_LSU-rRNA)"_GO	1	3.29142e-06	3.61816e-06	1175	0.00386742	0.00425134	10	449	20	4802
Cluster_YJM1273_Induced_logFC_Genes	Cluster_90S_preribosome_GO	0.999999	7.81389e-06	8.91759e-06	1175	0.00918132	0.0104782	11	449	26	4802
Cluster_YJM1273_Induced_logFC_Genes	Cluster_ribosome_biogenesis_GO	0.999995	8.78062e-06	1.39689e-05	1174.99	0.0103172	0.0164135	33	449	164	4802
Cluster_YJM1273_Induced_logFC_Genes	Cluster_RNA_binding_GO	0.999996	1.01533e-05	1.45739e-05	1175	0.0119301	0.0171243	24	449	102	4802
Cluster_YJM1273_Induced_logFC_Genes	Cluster_rRNA_export_from_nucleus_GO	0.999996	2.95344e-05	3.31525e-05	1175	0.0347029	0.0389542	9	449	20	4802
Cluster_YJM1273_Induced_logFC_Genes	Cluster_ribosomal_small_subunit_assembly_and_maintenance_GO	0.999998	4.07112e-05	4.25333e-05	1175	0.0478357	0.0499766	6	449	9	4802
Cluster_YJM1273_Induced_logFC_Genes	Cluster_small-subunit_processome_GO	0.999967	0.000218092	0.000251245	1174.96	0.256258	0.295213	8	449	20	4802
Cluster_YJM1273_Induced_logFC_Genes	Cluster_ribosomal_large_subunit_assembly_and_maintenance_GO	0.999985	0.000293047	0.00030844	1174.98	0.34433	0.362417	5	449	8	4802
Cluster_YJM1273_Induced_logFC_Genes	Cluster_Flocculation_APGcategory	0.999993	0.000342546	0.000349671	1174.99	0.402492	0.410863	4	449	5	4802
Cluster_YJM1273_Repressed_logFC_Genes	Cluster_SGD-nonessentials_APGcategory	1	6.77774e-13	1.04255e-12	1175	7.96384e-10	1.225e-09	427	470	3804	4802
Cluster_YJM1273_Repressed_logFC_Genes	Cluster_iESR_APGcategory	1	7.88691e-13	1.10341e-12	1175	9.26712e-10	1.29651e-09	60	470	238	4802
Cluster_YJM1273_Repressed_logFC_Genes	Cluster_TATAcontaining_APGcategory	1	2.41147e-08	5.13246e-08	1175	2.83348e-05	6.03064e-05	132	470	888	4802
Cluster_YJM1273_Repressed_logFC_Genes	Cluster_GenesWithParalogs_E-100_APGcategory	0.999999	1.69316e-06	2.62877e-06	1175	0.00198946	0.0030888	36	470	166	4802
Cluster_YJM1273_Repressed_logFC_Genes	Cluster_response_to_toxin_GO	0.99995	0.000378714	0.000429008	1174.94	0.444989	0.504084	7	470	16	4802
Cluster_YJM1273_Repressed_logFC_Genes	Cluster_TFs_APGcategory	0.999958	0.000428429	0.000470569	1174.95	0.503404	0.552919	6	470	12	4802
Cluster_YJM1389_Induced_logFC_Genes	Cluster_Spellman_M-G1_peak	0.999937	0.000112452	0.000175568	1174.93	0.132131	0.206292	25	677	85	4802
Cluster_YJM1389_Induced_logFC_Genes	Cluster_mRNA_metabolic_process_GO	0.999992	0.000283735	0.000291622	1174.99	0.333389	0.342656	5	677	6	4802
Cluster_YJM1389_Induced_logFC_Genes	Cluster_cell_wall_organization_GO	0.999881	0.000252527	0.000371255	1174.86	0.296719	0.436225	19	677	60	4802
Cluster_YJM1389_Induced_logFC_Genes	Cluster_response_to_stress_GO	0.999877	0.000308445	0.000431289	1174.86	0.362423	0.506765	16	677	47	4802
Cluster_YJM1389_Repressed_logFC_Genes	Cluster_TATAcontaining_APGcategory	1	2.59929e-13	5.08492e-13	1175	3.05417e-10	5.97478e-10	195	674	888	4802
Cluster_YJM1389_Repressed_logFC_Genes	Cluster_GenesWithParalogs_E-100_APGcategory	1	9.77766e-12	1.36813e-11	1175	1.14888e-08	1.60755e-08	57	674	166	4802
Cluster_YJM1389_Repressed_logFC_Genes	Cluster_ScParalogs_E-10_APGcategory	1	3.71102e-10	8.59854e-10	1175	4.36045e-07	1.01033e-06	234	674	1203	4802
Cluster_YJM1389_Repressed_logFC_Genes	Cluster_SGD-nonessentials_APGcategory	1	8.09697e-09	1.69223e-08	1175	9.51394e-06	1.98837e-05	586	674	3804	4802
Cluster_YJM1592_Induced_logFC_Genes	Cluster_autophagy_GO	0.999999	2.85609e-06	4.19767e-06	1175	0.00335591	0.00493226	38	1276	74	4802
Cluster_YJM1592_Induced_logFC_Genes	Cluster_iESR_APGcategory	0.999989	9.13388e-06	1.97959e-05	1174.99	0.0107323	0.0232602	92	1276	238	4802
Cluster_YJM1592_Induced_logFC_Genes	Cluster_pre-autophagosomal_structure_GO	0.999929	0.000425754	0.00049707	1174.92	0.500261	0.584057	11	1276	16	4802
Cluster_YJM1592_Repressed_logFC_Genes	Cluster_RPs_APGcategory	1	1.48273e-46	1.58478e-46	1175	1.74221e-43	1.86212e-43	105	1050	132	4802
Cluster_YJM1592_Repressed_logFC_Genes	Cluster_rESR_RPs_APGcategory	1	6.7808e-39	7.31033e-39	1175	7.96744e-36	8.58964e-36	91	1050	117	4802
Cluster_YJM1592_Repressed_logFC_Genes	Cluster_ScParalogs_E-10_APGcategory	1	5.58435e-30	9.63124e-30	1175	6.56161e-27	1.13167e-26	408	1050	1203	4802
Cluster_YJM1592_Repressed_logFC_Genes	Cluster_translation_GO	1	2.23354e-23	2.73984e-23	1175	2.62441e-20	3.21931e-20	90	1050	155	4802
Cluster_YJM1592_Repressed_logFC_Genes	Cluster_structural_constituent_of_ribosome_GO	1	9.36518e-22	1.03763e-21	1175	1.10041e-18	1.21922e-18	56	1050	77	4802
Cluster_YJM1592_Repressed_logFC_Genes	Cluster_ribosome_GO	1	4.73734e-19	5.57804e-19	1175	5.56637e-16	6.5542e-16	62	1050	98	4802
Cluster_YJM1592_Repressed_logFC_Genes	Cluster_rESR_APGcategory	1	4.48736e-19	7.51796e-19	1175	5.27265e-16	8.8336e-16	197	1050	520	4802
Cluster_YJM1592_Repressed_logFC_Genes	Cluster_ribonucleoprotein_complex_GO	1	1.26529e-17	1.50385e-17	1175	1.48672e-14	1.76702e-14	59	1050	95	4802
Cluster_YJM1592_Repressed_logFC_Genes	Cluster_cytosolic_small_ribosomal_subunit_GO	1	5.57622e-14	5.80858e-14	1175	6.55206e-11	6.82508e-11	26	1050	30	4802
Cluster_YJM1592_Repressed_logFC_Genes	Cluster_cytosolic_large_ribosomal_subunit_GO	1	3.20364e-10	3.59885e-10	1175	3.76428e-07	4.22865e-07	26	1050	37	4802
Cluster_YJM1592_Repressed_logFC_Genes	Cluster_intracellular_GO	1	3.28139e-09	4.93423e-09	1175	3.85563e-06	5.79772e-06	60	1050	137	4802
Cluster_YJM1592_Repressed_logFC_Genes	Cluster_TATAcontaining_APGcategory	1	5.44814e-09	1.39824e-08	1175	6.40156e-06	1.64293e-05	258	1050	888	4802
Cluster_YJM1592_Repressed_logFC_Genes	Cluster_ESR_APGcategory	1	6.34944e-08	1.6536e-07	1175	7.46059e-05	0.000194298	221	1050	758	4802
Cluster_YJM1592_Repressed_logFC_Genes	Cluster_GenesWithParalogs_E-100_APGcategory	1	1.28907e-07	2.16928e-07	1175	0.000151466	0.00025489	65	1050	166	4802
Cluster_YJM1592_Repressed_logFC_Genes	Cluster_regulation_of_translation_GO	1	2.37378e-07	4.0383e-07	1175	0.000278919	0.0004745	64	1050	165	4802
Cluster_YJM1592_Repressed_logFC_Genes	Cluster_biopolymer_biosynthetic_process_GO	1	6.34253e-07	8.56686e-07	1175	0.000745247	0.00100661	31	1050	62	4802
Cluster_YJM1592_Repressed_logFC_Genes	Cluster_Pu_Protein_complex	0.999997	1.44987e-06	4.47681e-06	1175	0.0017036	0.00526025	267	1050	980	4802
Cluster_YJM1592_Repressed_logFC_Genes	Cluster_integral_to_membrane_GO	0.999994	5.31066e-06	1.11878e-05	1174.99	0.00624003	0.0131457	85	1050	256	4802
Cluster_YJM1592_Repressed_logFC_Genes	Cluster_small_ribosomal_subunit_GO	1	2.3527e-05	2.43702e-05	1175	0.0276442	0.028635	7	1050	7	4802
Cluster_YJM1592_Repressed_logFC_Genes	Cluster_P-P-bond-hydrolysis-driven_protein_transmembrane_transporter_activity_GO	1	2.3527e-05	2.43702e-05	1175	0.0276442	0.028635	7	1050	7	4802
Cluster_YJM1592_Repressed_logFC_Genes	Cluster_protein_import_into_mitochondrial_matri_GO	0.999997	2.69104e-05	2.95616e-05	1175	0.0316197	0.0347349	11	1050	15	4802
Cluster_YJM1592_Repressed_logFC_Genes	Cluster_fatty_acid_biosynthetic_process_GO	0.999999	3.6047e-05	3.7191e-05	1175	0.0423552	0.0436994	8	1050	9	4802
Cluster_YJM1592_Repressed_logFC_Genes	Cluster_endoplasmic_reticulum_GO	0.999979	2.60488e-05	4.71128e-05	1174.98	0.0306073	0.0553575	49	1050	133	4802
Cluster_YJM1592_Repressed_logFC_Genes	Cluster_endoplasmic_reticulum_membrane_GO	0.999953	6.94005e-05	0.000116329	1174.94	0.0815456	0.136687	36	1050	92	4802
Cluster_YJM1592_Repressed_logFC_Genes	Cluster_cytoplasm_GO	0.99992	3.91425e-05	0.000119431	1174.91	0.0459924	0.140331	169	1050	607	4802
Cluster_YJM1592_Repressed_logFC_Genes	Cluster_FattyAcid_APGcategory	0.99995	0.000181292	0.000231572	1174.94	0.213018	0.272097	15	1050	28	4802
Cluster_YJM1592_Repressed_logFC_Genes	Cluster_rRNA_export_from_nucleus_GO	0.99996	0.000202658	0.000242587	1174.95	0.238123	0.28504	12	1050	20	4802
Cluster_YJM1592_Repressed_logFC_Genes	Cluster_anchored_to_membrane_GO	0.99996	0.000404729	0.000444351	1174.95	0.475557	0.522112	8	1050	11	4802
Cluster_YJM978_Induced_logFC_Genes	Cluster_GenesWithParalogs_E-100_APGcategory	1	4.62266e-07	6.59774e-07	1175	0.000543163	0.000775234	30	331	166	4802
Cluster_YJM978_Induced_logFC_Genes	Cluster_TATAcontaining_APGcategory	0.999997	2.78811e-06	6.03091e-06	1175	0.00327603	0.00708632	93	331	888	4802
Cluster_YJM978_Induced_logFC_Genes	Cluster_methionine_biosynthetic_process_GO	0.999999	2.75954e-05	2.82732e-05	1175	0.0324246	0.033221	5	331	7	4802
Cluster_YJM978_Repressed_logFC_Genes	Cluster_MitochondrialRPs_APGcategory	1	9.76619e-21	1.04096e-20	1175	1.14753e-17	1.22313e-17	33	467	54	4802
Cluster_YJM978_Repressed_logFC_Genes	Cluster_SGD-nonessentials_APGcategory	1	5.03741e-11	8.26721e-11	1175	5.91896e-08	9.71397e-08	420	467	3804	4802
Cluster_YJM978_Repressed_logFC_Genes	Cluster_mitochondrial_large_ribosomal_subunit_GO	1	6.56158e-09	6.63157e-09	1175	7.70986e-06	7.79209e-06	9	467	10	4802
Cluster_YJM978_Repressed_logFC_Genes	Cluster_mitochondrial_translation_GO	1	8.78827e-07	9.27124e-07	1175	0.00103262	0.00108937	9	467	14	4802
Cluster_YJM978_Repressed_logFC_Genes	Cluster_TATAcontaining_APGcategory	0.999999	5.43324e-07	1.24565e-06	1175	0.000638406	0.00146364	126	467	888	4802
Cluster_YJM978_Repressed_logFC_Genes	Cluster_Spellman_G2-M_peak	0.999963	5.47342e-05	9.13442e-05	1174.96	0.0643127	0.107329	31	467	158	4802
Cluster_YJM978_Repressed_logFC_Genes	Cluster_iESR_APGcategory	0.999926	8.32732e-05	0.000157289	1174.91	0.097846	0.184815	41	467	238	4802
Cluster_YJM978_Repressed_logFC_Genes	Cluster_GenesWithParalogs_E-100_APGcategory	0.9999	0.000135225	0.000235537	1174.88	0.158889	0.276756	31	467	166	4802
Cluster_YPS128_Induced_logFC_Genes	Cluster_RPs_APGcategory	1	5.66846e-60	5.89458e-60	1175	6.66044e-57	6.92613e-57	79	335	132	4802
Cluster_YPS128_Induced_logFC_Genes	Cluster_rESR_RPs_APGcategory	1	6.69064e-53	6.96663e-53	1175	7.8615e-50	8.18579e-50	70	335	117	4802
Cluster_YPS128_Induced_logFC_Genes	Cluster_structural_constituent_of_ribosome_GO	1	6.95135e-27	7.39408e-27	1175	8.16784e-24	8.68804e-24	40	335	77	4802
Cluster_YPS128_Induced_logFC_Genes	Cluster_rESR_APGcategory	1	1.47225e-25	1.90837e-25	1175	1.72989e-22	2.24233e-22	103	335	520	4802
Cluster_YPS128_Induced_logFC_Genes	Cluster_ribosome_GO	1	6.80515e-22	7.51286e-22	1175	7.99605e-19	8.82761e-19	40	335	98	4802
Cluster_YPS128_Induced_logFC_Genes	Cluster_ribonucleoprotein_complex_GO	1	1.78492e-21	1.96901e-21	1175	2.09728e-18	2.31359e-18	39	335	95	4802
Cluster_YPS128_Induced_logFC_Genes	Cluster_translation_GO	1	4.26253e-20	4.9734e-20	1175	5.00847e-17	5.84374e-17	48	335	155	4802
Cluster_YPS128_Induced_logFC_Genes	Cluster_cytosolic_small_ribosomal_subunit_GO	1	2.2229e-18	2.28853e-18	1175	2.61191e-15	2.68902e-15	21	335	30	4802
Cluster_YPS128_Induced_logFC_Genes	Cluster_ScParalogs_E-10_APGcategory	1	4.40614e-16	7.10433e-16	1175	5.17721e-13	8.34759e-13	149	335	1203	4802
Cluster_YPS128_Induced_logFC_Genes	Cluster_intracellular_GO	1	4.21741e-15	5.04917e-15	1175	4.95546e-12	5.93277e-12	39	335	137	4802
Cluster_YPS128_Induced_logFC_Genes	Cluster_ESR_APGcategory	1	8.76951e-15	1.36398e-14	1175	1.03042e-11	1.60268e-11	107	335	758	4802
Cluster_YPS128_Induced_logFC_Genes	Cluster_cytosolic_large_ribosomal_subunit_GO	1	2.1677e-14	2.29857e-14	1175	2.54705e-11	2.70082e-11	20	335	37	4802
Cluster_YPS128_Induced_logFC_Genes	Cluster_Pu_Protein_complex	1	1.0403e-11	1.81003e-11	1175	1.22235e-08	2.12679e-08	119	335	980	4802
Cluster_YPS128_Induced_logFC_Genes	Cluster_maturation_of_SSU-rRNA_from_tricistronic_rRNA_transcript_(SSU-rRNA,_5.8S_rRNA,_LSU-rRNA)"_GO	0.999997	2.79631e-05	3.09347e-05	1175	0.0328566	0.0363483	8	335	20	4802
Cluster_YPS128_Induced_logFC_Genes	Cluster_heme_biosynthetic_process_GO	0.999998	0.000108431	0.000110058	1175	0.127406	0.129318	4	335	5	4802
Cluster_YPS128_Induced_logFC_Genes	Cluster_ribosomal_small_subunit_assembly_and_maintenance_GO	0.999992	0.000152234	0.000159978	1174.99	0.178875	0.187974	5	335	9	4802
Cluster_YPS128_Induced_logFC_Genes	Cluster_mitochondrial_inner_membrane_GO	0.999941	0.000199108	0.000258391	1174.93	0.233952	0.303609	12	335	54	4802
Cluster_YPS128_Induced_logFC_Genes	Cluster_90S_preribosome_GO	0.999962	0.000226675	0.000264621	1174.96	0.266343	0.31093	8	335	26	4802
Cluster_YPS128_Induced_logFC_Genes	Cluster_ubiquinol-cytochrome-c_reductase_activity_GO	0.999991	0.000302847	0.000311937	1174.99	0.355845	0.366526	4	335	6	4802
Cluster_YPS128_Induced_logFC_Genes	Cluster_protein_import_into_mitochondrial_matri_GO	0.99997	0.000291699	0.000321527	1174.96	0.342746	0.377794	6	335	15	4802
Cluster_YPS128_Induced_logFC_Genes	Cluster_electron_transport_chain_GO	0.99995	0.000434641	0.000484517	1174.94	0.510703	0.569307	6	335	16	4802
Cluster_YPS128_Repressed_logFC_Genes	Cluster_TATAcontaining_APGcategory	1	2.58646e-14	4.24263e-14	1175	3.03909e-11	4.98509e-11	125	364	888	4802
Cluster_YPS128_Repressed_logFC_Genes	Cluster_SGD-nonessentials_APGcategory	1	2.49259e-10	3.84006e-10	1175	2.92879e-07	4.51207e-07	331	364	3804	4802
Cluster_YPS128_Repressed_logFC_Genes	Cluster_iESR_APGcategory	1	8.41284e-09	1.23818e-08	1175	9.88509e-06	1.45486e-05	44	364	238	4802
Cluster_YPS128_Repressed_logFC_Genes	Cluster_ScParalogs_E-10_APGcategory	1	3.64552e-08	7.6938e-08	1175	4.28349e-05	9.04022e-05	135	364	1203	4802
Cluster_YPS128_Repressed_logFC_Genes	Cluster_GenesWithParalogs_E-100_APGcategory	1	3.62703e-07	5.24033e-07	1175	0.000426176	0.000615739	32	364	166	4802
Cluster_YPS128_Repressed_logFC_Genes	Cluster_Arginine_APGcategory	0.999999	1.46977e-05	1.56263e-05	1175	0.0172698	0.0183609	7	364	13	4802
Cluster_YPS163_Induced_logFC_Genes	Cluster_rESR_APGcategory	1	2.30842e-20	2.88725e-20	1175	2.71239e-17	3.39252e-17	69	199	520	4802
Cluster_YPS163_Induced_logFC_Genes	Cluster_PAC_APGcategory	1	3.15349e-15	4.04669e-15	1175	3.70535e-12	4.75486e-12	53	199	403	4802
Cluster_YPS163_Induced_logFC_Genes	Cluster_ESR_APGcategory	1	1.10026e-11	1.62591e-11	1175	1.29281e-08	1.91044e-08	69	199	758	4802
Cluster_YPS163_Induced_logFC_Genes	Cluster_rESR_RPs_APGcategory	0.999995	1.57054e-05	2.05695e-05	1174.99	0.0184538	0.0241692	16	199	117	4802
Cluster_YPS163_Induced_logFC_Genes	Cluster_RPs_APGcategory	0.999975	6.75418e-05	9.27164e-05	1174.97	0.0793616	0.108942	16	199	132	4802
Cluster_YPS163_Induced_logFC_Genes	Cluster_ScParalogs_E-10_APGcategory	0.999929	6.06193e-05	0.000131888	1174.92	0.0712277	0.154968	73	199	1203	4802
Cluster_YPS163_Induced_logFC_Genes	Cluster_phosphorus_metabolic_process_GO	0.999975	0.000468965	0.000493691	1174.97	0.551034	0.580087	4	199	10	4802
Cluster_YPS163_Repressed_logFC_Genes	Cluster_TATAcontaining_APGcategory	1	3.12393e-16	5.23761e-16	1175	3.67062e-13	6.15419e-13	156	470	888	4802
Cluster_YPS163_Repressed_logFC_Genes	Cluster_iESR_APGcategory	1	4.6823e-15	6.32077e-15	1175	5.5017e-12	7.4269e-12	64	470	238	4802
Cluster_YPS163_Repressed_logFC_Genes	Cluster_SGD-nonessentials_APGcategory	1	8.3074e-14	1.24244e-13	1175	9.7612e-11	1.45987e-10	429	470	3804	4802
Cluster_YPS163_Repressed_logFC_Genes	Cluster_GenesWithParalogs_E-100_APGcategory	1	1.86705e-10	2.56137e-10	1175	2.19378e-07	3.00961e-07	44	470	166	4802
Cluster_YPS163_Repressed_logFC_Genes	Cluster_ScParalogs_E-10_APGcategory	1	2.71442e-08	6.16231e-08	1175	3.18944e-05	7.24071e-05	167	470	1203	4802
Cluster_YPS163_Repressed_logFC_Genes	Cluster_Arginine_APGcategory	1	6.18531e-06	6.56821e-06	1175	0.00726774	0.00771765	8	470	13	4802
Cluster_YPS163_Repressed_logFC_Genes	Cluster_arginine_biosynthetic_process_GO	1	9.07168e-05	9.27035e-05	1175	0.106592	0.108927	4	470	4	4802
Cluster_YPS163_Repressed_logFC_Genes	Cluster_response_to_toxin_GO	0.99995	0.000378714	0.000429008	1174.94	0.444989	0.504084	7	470	16	4802
Cluster_YPS163_Repressed_logFC_Genes	Cluster_TFs_APGcategory	0.999958	0.000428429	0.000470569	1174.95	0.503404	0.552919	6	470	12	4802
Cluster_YPS606_Induced_logFC_Genes	Cluster_rESR_APGcategory	1	7.70875e-15	1.03755e-14	1175	9.05778e-12	1.21912e-11	63	213	520	4802
Cluster_YPS606_Induced_logFC_Genes	Cluster_RPs_APGcategory	1	2.7959e-10	3.37183e-10	1175	3.28518e-07	3.9619e-07	25	213	132	4802
Cluster_YPS606_Induced_logFC_Genes	Cluster_rESR_RPs_APGcategory	1	6.99777e-10	8.36822e-10	1175	8.22238e-07	9.83266e-07	23	213	117	4802
Cluster_YPS606_Induced_logFC_Genes	Cluster_ESR_APGcategory	1	1.53567e-08	2.52997e-08	1175	1.80441e-05	2.97271e-05	65	213	758	4802
Cluster_YPS606_Induced_logFC_Genes	Cluster_ScParalogs_E-10_APGcategory	1	8.92967e-08	1.6313e-07	1175	0.000104924	0.000191678	87	213	1203	4802
Cluster_YPS606_Induced_logFC_Genes	Cluster_PAC_APGcategory	1	4.06423e-07	6.31268e-07	1175	0.000477547	0.00074174	40	213	403	4802
Cluster_YPS606_Induced_logFC_Genes	Cluster_ribosome_GO	0.999995	1.66099e-05	2.13834e-05	1174.99	0.0195166	0.0251255	15	213	98	4802
Cluster_YPS606_Induced_logFC_Genes	Cluster_structural_constituent_of_ribosome_GO	0.999995	2.11704e-05	2.63947e-05	1174.99	0.0248752	0.0310138	13	213	77	4802
Cluster_YPS606_Induced_logFC_Genes	Cluster_translation_GO	0.999956	9.98572e-05	0.00014423	1174.95	0.117332	0.16947	18	213	155	4802
Cluster_YPS606_Induced_logFC_Genes	Cluster_ribonucleoprotein_complex_GO	0.999938	0.000184324	0.000246766	1174.93	0.216581	0.28995	13	213	95	4802
Cluster_YPS606_Induced_logFC_Genes	Cluster_cytosolic_small_ribosomal_subunit_GO	0.999967	0.000227207	0.000260233	1174.96	0.266968	0.305774	7	213	30	4802
Cluster_YPS606_Repressed_logFC_Genes	Cluster_TATAcontaining_APGcategory	1	4.62846e-14	7.99565e-14	1175	5.43844e-11	9.39489e-11	143	440	888	4802
Cluster_YPS606_Repressed_logFC_Genes	Cluster_iESR_APGcategory	1	2.08767e-11	2.97304e-11	1175	2.45301e-08	3.49332e-08	55	440	238	4802
Cluster_YPS606_Repressed_logFC_Genes	Cluster_SGD-nonessentials_APGcategory	1	8.80375e-10	1.49105e-09	1175	1.03444e-06	1.75198e-06	394	440	3804	4802
Cluster_YPS606_Repressed_logFC_Genes	Cluster_GenesWithParalogs_E-100_APGcategory	1	3.60915e-09	5.05685e-09	1175	4.24075e-06	5.9418e-06	40	440	166	4802
Cluster_YPS606_Repressed_logFC_Genes	Cluster_ScParalogs_E-10_APGcategory	1	9.25118e-08	2.11869e-07	1175	0.000108701	0.000248946	156	440	1203	4802
Cluster_YPS606_Repressed_logFC_Genes	Cluster_Arginine_APGcategory	0.999996	5.04717e-05	5.44492e-05	1175	0.0593042	0.0639778	7	440	13	4802
Cluster_YPS606_Repressed_logFC_Genes	Cluster_oidation_reduction_GO	0.999943	0.000137772	0.000194513	1174.93	0.161882	0.228553	17	440	72	4802
Cluster_YPS606_Repressed_logFC_Genes	Cluster_oidoreductase_activity_GO	0.999939	0.000155038	0.000215644	1174.93	0.18217	0.253382	16	440	66	4802
Cluster_YPS606_Repressed_logFC_Genes	Cluster_response_to_toxin_GO	0.999969	0.000253197	0.000284205	1174.96	0.297506	0.333941	7	440	16	4802
