# Supplementary material for: Natural variation in the consequences of gene overexpression and its implications for evolutionary trajectories
Source: eLife. 2021 Aug 2;10:e70564. doi: 10.7554/eLife.70564 (PMC8352584; doi:10.7554/eLife.70564)
Supplement: Supplementary file 8. — Tab 1: List of Moby genes measured in all three replications at generation 0 in at least one strain, minus the set of 431 common genes. This list was used as the background data set for Wilcoxon rank-sum tests analyzing common genes. Tab 2: List of Moby genes with no effect (FDR>0.1) in each strain, used for Wilcoxon rank-sum tests of strain-specific genes. Tab 3: List of Moby genes significant in at least one strain (FDR<0.05), used for Hypergeometric enrichment tests analyzing common genes. Tab 4: List of Moby genes significant in at least one strain (FDR<0.05) excluding the 431 common genes, used for Hypergeometric tests for strain-specific genes. [file elife-70564-supp8.xlsx]

## Sheet: Non Common Genes
Moby_Non_Common_Genes
YDR225W
YIL077C
YNR059W
YGR138C
YDR379W
YLR262C
YNR073C
YOL018C
YFR049W
YMR257C
YNL108C
YPL109C
YDR410C
YJL125C
YMR297W
YPL243W
YIL005W
YKL021C
YOR133W
YPL029W
YBR288C
YDL089W
YDR284C
YDR348C
YER122C
YGL015C
YGL226W
YGR233C
YHL013C
YKL088W
YNL135C
YNL265C
YAL012W
YBR213W
YDL017W
YDL211C
YDR182W
YDR246W
YDR328C
YDR504C
YGR135W
YGR161C
YGR213C
YHL039W
YIL117C
YJL078C
YLR395C
YML034W
YMR227C
YOR126C
YOR147W
YPL005W
YPL089C
YBL075C
YBR047W
YBR059C
YBR131W
YBR139W
YBR170C
YBR196C-B
YBR227C
YBR242W
YDL020C
YDL036C
YDL127W
YDL135C
YDL146W
YDL174C
YDL224C
YDR066C
YDR077W
YDR090C
YDR221W
YDR226W
YDR286C
YDR287W
YDR357C
YDR488C
YFL012W
YFL044C
YGL047W
YGL087C
YGL126W
YGL162W
YGL171W
YGL227W
YGR196C
YGR240C
YGR248W
YGR255C
YHL015W-A
YHR046C
YIL071C
YIL101C
YIR038C
YJL006C
YJL027C
YJL153C
YJR013W
YJR024C
YJR075W
YJR125C
YKL041W
YKL221W
YKR001C
YKR101W
YLL029W
YLL038C
YLR073C
YLR179C
YLR324W
YLR364W
YLR449W
YML054C
YMR005W
YMR032W
YMR233W
YNL024C
YNL149C
YNL187W
YNR015W
YNR036C
YNR074C
YOL049W
YOL147C
YOR241W
YOR258W
YOR347C
YPL045W
YPL051W
YPL079W
YPL088W
YPL157W
YPL245W
YPL250C
YPR163C
YAL013W
YAL019W
YAL027W
YAL039C
YAL040C
YAL053W
YAR002C-A
YBL016W
YBL027W
YBL033C
YBL080C
YBR005W
YBR013C
YBR024W
YBR039W
YBR055C
YBR088C
YBR091C
YBR095C
YBR098W-1
YBR132C
YBR146W
YBR158W
YBR164C
YBR173C
YBR182C
YBR183W
YBR186W
YBR188C
YBR193C
YBR195C
YBR202W
YBR212W
YBR216C
YBR223C
YBR228W
YBR231C
YBR241C
YBR245C
YBR246W
YBR273C
YBR293W
YBR295W
YBR296C-A
YCL008C
YDR315C-1
YDR315C-2
YER007W-1
YGL145W-1
YCR027C
YCR044C
YCR048W
YCR063W
YDL010W
YDL030W
YDL065C
YDL076C
YDL093W
YDL097C
YDL099W
YDL122W
YDL125C
YDL142C
YDL159W
YDL173W
YDL179W
YDL181W
YDL183C
YDL197C
YDL218W
YDL219W
YDL222C
YDL230W
YDL234C
YDR003W
YDR004W
YDR047W
YDR059C
YDR068W
YDR069C
YDR070C
YDR079W
YDR082W
YDR108W
YDR137W
YDR143C
YDR145W
YDR151C
YDR152W
YDR158W
YDR163W
YDR165W
YDR169C
YDR172W
YDR174W
YDR178W
YDR179W-A
YDR189W
YDR235W
YDR237W
YDR245W
YDR251W
YDR255C
YDR268W
YDR305C
YDR363W-A
YDR368W
YDR371W
YDR384C
YDR387C
YDR390C
YDR399W
YDR408C
YDR419W
YDR429C
YDR447C
YDR453C
YDR454C
YDR462W
YDR466W
YDR470C
YDR473C
YDR478W
YDR486C
YDR490C
YDR494W
YDR511W
YDR529C
YEL002C
YEL017C-A
YEL042W
YER003C
YER005W
YER044C-A
YER049W
YER053C-A
YER061C
YER073W
YER101C
YER112W
YER129W
YER137C
YFL027C
YFL030W
YFL034C-A
YFL034W
YFR003C
YFR006W
YFR011C
YFR015C
YFR016C
YFR025C
YFR030W
YFR035C
YFR043C
YFR055W
YGL018C
YGL028C
YGL040C
YGL092W
YGL133W
YGL139W
YGL142C
YGL154C
YGL170C
YGL205W
YGL225W
YGL230C
YGL231C
YGL236C
YGL241W
YGR001C
YGR007W
YGR015C
YGR021W
YGR026W
YGR027C
YGR035C
YGR040W
YGR053C
YGR066C
YGR071C
YGR075C
YGR078C
YGR089W
YGR112W
YGR130C
YGR131W
YGR143W
YGR149W
YGR154C
YGR165W
YGR166W
YGR183C
YGR206W
YGR212W
YGR215W
YGR234W
YGR247W
YGR254W
YGR257C
YGR261C
YGR267C
YGR277C
YGR278W
YGR286C
YHL040C
YHL044W
YHR033W
YHR045W
YHR050W
YHR059W
YHR070W
YHR100C
YHR152W
YHR154W
YHR158C
YHR182W
YHR183W
YHR186C
YHR191C
YHR192W
YHR199C-A
YHR202W
YIL004C
YIL007C
YIL008W
YIL022W
YIL034C
YIL038C
YIL053W
YIL068C
YIL096C
YIL116W
YIL123W
YIL128W
YIL138C
YIL146C
YIR017C
YIR021W
YIR025W
YIR042C
YJL002C
YJL003W
YJL024C
YJL076W
YJL101C
YJL104W
YJL105W
YJL121C
YJL139C
YJL159W
YJL170C
YJL186W
YJL191W
YJL208C
YJR011C
YJR041C
YJR050W
YJR055W
YJR060W
YJR078W
YJR084W
YJR085C
YJR107W
YJR109C
YJR110W
YJR119C
YJR124C
YJR153W
YKL003C
YKL025C
YKL033W
YKL037W
YKL072W
YKL084W
YKL087C
YKL093W
YKL107W
YKL138C
YKL142W
YKL144C
YKL165C
YKL170W
YKL174C
YKL214C
YKR011C
YKR018C
YKR029C
YKR035W-A
YKR060W
YKR078W
YKR098C
YKR106W
YLL018C-A
YLL025W
YLR008C
YLR014C
YLR017W
YLR044C
YLR060W
YLR116W
YLR119W
YLR120C
YLR133W
YLR138W
YLR143W
YLR151C
YLR154C
YLR170C
YLR177W
YLR190W
YLR195C
YLR201C
YLR207W
YLR234W
YLR238W
YLR266C
YLR268W
YLR271W
YLR283W
YLR300W
YLR304C
YLR306W
YLR323C
YLR325C
YLR354C
YLR385C
YLR389C
YLR397C
YLR423C
YLR438C-A
YLR442C
YLR452C
YLR453C
YLR456W
YLR459W
YLR461W
YML041C
YML048W
YML050W
YML070W
YML081C-A
YML082W
YML097C
YML098W
YML106W
YML115C
YML121W
YML130C
YMR017W
YMR026C
YMR031C
YMR040W
YMR041C
YMR073C
YMR088C
YMR102C
YMR108W
YMR114C
YMR119W
YMR132C
YMR134W
YMR168C
YMR175W
YMR177W
YMR178W
YMR193W
YMR197C
YMR198W
YMR226C
YMR253C
YMR273C
YMR279C
YMR291W
YMR298W
YMR299C
YMR301C
YNL006W
YNL061W
YNL066W
YNL084C
YNL096C
YNL097C
YNL142W
YNL152W
YNL155W
YNL169C
YNL177C
YNL181W
YNL188W
YNL214W
YNL218W
YNL230C
YNL245C
YNL280C
YNL293W
YNL295W
YNR004W
YNR008W
YNR027W
YNR030W
YNR034W
YNR037C
YNR039C
YNR047W
YNR048W
YNR058W
YNR075W
YOL009C
YOL044W
YOL055C
YOL057W
YOL096C
YOL162W
YOR014W
YOR045W
YOR057W
YOR077W
YOR089C
YOR094W
YOR103C
YOR150W
YOR167C
YOR174W
YOR236W
YOR259C
YOR269W
YOR283W
YOR288C
YOR304W
YOR308C
YOR356W
YOR362C
YPL021W
YPL047W
YPL050C
YPL053C
YPL069C
YPL086C
YPL108W
YPL126W
YPL134C
YPL147W
YPL158C
YPL163C
YPL194W
YPL196W
YPL202C
YPL207W
YPL218W
YPL235W
YPL240C
YPL247C
YPL270W
YPR004C
YPR011C
YPR013C
YPR021C
YPR078C
YPR083W
YPR086W
YPR100W
YPR119W
YPR122W
YPR131C
YPR175W
YPR196W
YAL001C
YAL002W
YAL007C
YAL009W
YAL010C
YAL011W
YAL015C
YAL016C-B
YAL016W
YAL018C
YAL020C
YAL022C
YAL028W
YAL030W
YAL031C
YAL032C
YAL033W
YAL034C
YAL037C-A
YAL042W
YAL043C
YAL044C
YAL048C
YAL054C
YAL055W
YAL056W
YAL059W
YAL060W
YAL062W
YAL064C-A
YAL067C
YAL068C
YAR002W
YAR003W
YAR015W
YAR018C
YAR020C
YAR023C
YAR027W
YAR028W
YAR029W
YAR031W
YAR035C-A
YAR035W
YBL001C
YBL002W
YBL003C
YBL006C
YBL007C
YBL008W
YBL008W-A
YBL009W
YBL010C
YBL011W
YBL013W
YBL015W
YBL017C
YBL018C
YBL019W
YBL021C
YBL024W
YBL025W
YBL026W
YBL028C
YBL029W
YBL031W
YBL035C
YBL036C
YBL037W
YBL040C
YBL045C
YBL049W
YBL050W
YBL052C
YBL054W
YBL055C
YBL056W
YBL057C
YBL059W
YBL061C
YBL064C
YBL066C
YBL067C
YBL068W
YBL069W
YBL071C-B
YBL071W-A
YBL074C
YBL076C
YBL078C
YBL081W
YBL085W
YBL086C
YBL087C
YBL089W
YBL090W
YBL091C
YBL091C-A
YBL102W
YBL103C
YBL104C
YBL105C
YBL106C
YBL107C
YBR001C
YBR002C
YBR003W
YBR007C
YBR009C
YBR011C
YBR018C
YBR020W
YBR022W
YBR026C
YBR028C
YBR029C
YBR030W
YBR031W
YBR034C
YBR035C
YBR036C
YBR037C
YBR040W
YBR041W
YBR043C
YBR044C
YBR045C
YBR046C
YBR050C
YBR052C
YBR053C
YBR056W
YBR056W-A
YBR058C-A
YBR060C
YBR061C
YBR063C
YBR065C
YBR066C
YBR067C
YBR068C
YBR070C
YBR071W
YBR072C-A
YBR072W
YBR074W
YBR076W
YBR077C
YBR082C
YBR083W
YBR084C-A
YBR084W
YBR085C-A
YBR085W
YBR087W
YBR090C
YBR092C
YBR093C
YBR096W
YBR102C
YBR103W
YBR104W
YBR105C
YBR106W
YBR107C
YBR108W
YBR110W
YBR111C
YBR111W-A
YBR117C
YBR120C
YBR125C
YBR126C
YBR128C
YBR129C
YBR130C
YBR137W
YBR138C
YBR140C
YBR141C
YBR145W
YBR147W
YBR148W
YBR149W
YBR151W
YBR152W
YBR154C
YBR155W
YBR156C
YBR157C
YBR160W
YBR161W
YBR163W
YBR165W
YBR166C
YBR167C
YBR169C
YBR171W
YBR175W
YBR176W
YBR177C
YBR180W
YBR181C
YBR182C-A
YBR185C
YBR191W
YBR194W
YBR198C
YBR199W
YBR200W
YBR200W-A
YBR201W
YBR204C
YBR205W
YBR207W
YBR210W
YBR211C
YBR214W
YBR215W
YBR217W
YBR218C
YBR220C
YBR221C
YBR221W-A
YBR225W
YBR229C
YBR230W-A
YBR233W
YBR234C
YBR236C
YBR239C
YBR244W
YBR249C
YBR250W
YBR251W
YBR253W
YBR254C
YBR257W
YBR258C
YBR259W
YBR261C
YBR262C
YBR263W
YBR264C
YBR265W
YBR267W
YBR268W
YBR271W
YBR276C
YBR278W
YBR279W
YBR281C
YBR282W
YBR284W
YBR285W
YBR286W
YBR290W
YBR291C
YBR294W
YBR298C
YBR299W
YBR301W
YCL001W
YCL001W-A
YCL001W-B
YCL002C
YCL004W
YCL010C
YCL011C
YCL016C
YCL017C
YCL025C
YCL026C-A
YCL030C
YCL035C
YCL036W
YCL038C
YCL042W
YCL050C
YCL051W
YCL052C
YCL055W
YCL056C
YCL057C-A
YCL063W
YCL064C
YCL069W
YCR002C
YCR003W
YCR004C
YCR005C
YCR007C
YCR008W
YCR009C
YCR010C
YCR015C
YCR016W
YCR019W
YCR020C
YCR020C-A
YCR021C
YCR024C
YCR028C
YCR028C-A
YCR035C
YCR036W
YCR037C
YCR043C
YCR045C
YCR046C
YCR047C
YCR053W
YCR054C
YCR059C
YCR060W
YCR061W
YCR065W
YCR067C
YCR068W
YCR069W
YCR071C
YCR073W-A
YCR075W-A
YCR076C
YCR077C
YCR079W
YCR083W
YCR084C
YCR087C-A
YCR090C
YCR091W
YCR094W
YCR095C
YCR095W-A
YCR099C
YCR100C
YCR101C
YCR105W
YCR106W
YCR107W
YDL001W
YDL003W
YDL004W
YDL005C
YDL006W
YDL007W
YDL008W
YDL012C
YDL013W
YDL018C
YDL022W
YDL024C
YDL025C
YDL027C
YDL028C
YDL029W
YDL033C
YDL037C
YDL040C
YDL044C
YDL046W
YDL048C
YDL052C
YDL053C
YDL054C
YDL055C
YDL056W
YDL059C
YDL061C
YDL063C
YDL064W
YDL066W
YDL067C
YDL069C
YDL070W
YDL072C
YDL074C
YDL075W
YDL078C
YDL080C
YDL083C
YDL085C-A
YDL085W
YDL087C
YDL088C
YDL090C
YDL091C
YDL092W
YDL098C
YDL100C
YDL101C
YDL102W
YDL105W
YDL106C
YDL107W
YDL109C
YDL110C
YDL113C
YDL114W
YDL115C
YDL116W
YDL120W
YDL121C
YDL123W
YDL124W
YDL128W
YDL129W
YDL130W-A
YDL136W
YDL138W
YDL139C
YDL141W
YDL143W
YDL144C
YDL148C
YDL149W
YDL150W
YDL155W
YDL156W
YDL159W-A
YDL160C
YDL160C-A
YDL164C
YDL165W
YDL166C
YDL167C
YDL168W
YDL169C
YDL170W
YDL175C
YDL176W
YDL177C
YDL178W
YDL180W
YDL182W
YDL186W
YDL189W
YDL190C
YDL191W
YDL193W
YDL194W
YDL199C
YDL200C
YDL201W
YDL202W
YDL203C
YDL204W
YDL205C
YDL206W
YDL209C
YDL212W
YDL213C
YDL214C
YDL217C
YDL227C
YDL235C
YDL237W
YDL241W
YDL243C
YDR001C
YDR003W-A
YDR006C
YDR007W
YDR013W
YDR014W
YDR020C
YDR021W
YDR022C
YDR023W
YDR026C
YDR032C
YDR035W
YDR036C
YDR037W
YDR041W
YDR042C
YDR044W
YDR045C
YDR049W
YDR051C
YDR054C
YDR055W
YDR056C
YDR057W
YDR058C
YDR062W
YDR063W
YDR064W
YDR065W
YDR067C
YDR072C
YDR073W
YDR076W
YDR078C
YDR079C-A
YDR080W
YDR081C
YDR083W
YDR085C
YDR087C
YDR088C
YDR091C
YDR098C
YDR100W
YDR101C
YDR103W
YDR107C
YDR109C
YDR110W
YDR113C
YDR115W
YDR116C
YDR118W
YDR120C
YDR121W
YDR122W
YDR124W
YDR125C
YDR138W
YDR139C
YDR142C
YDR144C
YDR147W
YDR148C
YDR153C
YDR156W
YDR162C
YDR164C
YDR169C-A
YDR171W
YDR175C
YDR177W
YDR179C
YDR180W
YDR181C
YDR183W
YDR184C
YDR191W
YDR194W-A
YDR197W
YDR198C
YDR200C
YDR201W
YDR202C
YDR205W
YDR208W
YDR213W
YDR214W
YDR218C
YDR219C
YDR222W
YDR223W
YDR228C
YDR229W
YDR231C
YDR234W
YDR236C
YDR238C
YDR240C
YDR242W
YDR243C
YDR244W
YDR246W-A
YDR247W
YDR249C
YDR252W
YDR253C
YDR254W
YDR256C
YDR257C
YDR258C
YDR259C
YDR261C
YDR262W
YDR263C
YDR265W
YDR266C
YDR272W
YDR277C
YDR280W
YDR282C
YDR285W
YDR288W
YDR289C
YDR292C
YDR294C
YDR295C
YDR296W
YDR297W
YDR301W
YDR304C
YDR307W
YDR308C
YDR310C
YDR311W
YDR312W
YDR314C
YDR316W
YDR317W
YDR319C
YDR320C
YDR321W
YDR322W
YDR323C
YDR324C
YDR330W
YDR332W
YDR333C
YDR339C
YDR346C
YDR347W
YDR350C
YDR352W
YDR353W
YDR354W
YDR359C
YDR362C
YDR364C
YDR367W
YDR369C
YDR372C
YDR373W
YDR375C
YDR376W
YDR377W
YDR378C
YDR379C-A
YDR381W
YDR383C
YDR386W
YDR389W
YDR393W
YDR394W
YDR397C
YDR400W
YDR402C
YDR404C
YDR405W
YDR409W
YDR416W
YDR421W
YDR422C
YDR425W
YDR427W
YDR428C
YDR430C
YDR434W
YDR436W
YDR437W
YDR446W
YDR449C
YDR450W
YDR451C
YDR456W
YDR459C
YDR460W
YDR461W
YDR463W
YDR465C
YDR468C
YDR472W
YDR476C
YDR479C
YDR480W
YDR481C
YDR482C
YDR484W
YDR487C
YDR489W
YDR496C
YDR498C
YDR499W
YDR500C
YDR501W
YDR502C
YDR503C
YDR506C
YDR508C
YDR510W
YDR512C
YDR513W
YDR514C
YDR515W
YDR516C
YDR517W
YDR518W
YDR519W
YDR522C
YDR523C
YDR527W
YDR528W
YDR530C
YDR531W
YDR532C
YDR533C
YDR534C
YDR536W
YDR538W
YDR539W
YDR541C
YEL001C
YEL003W
YEL004W
YEL006W
YEL009C
YEL011W
YEL012W
YEL016C
YEL018W
YEL019C
YEL023C
YEL026W
YEL027W
YEL029C
YEL032W
YEL037C
YEL039C
YEL040W
YEL041W
YEL046C
YEL048C
YEL049W
YEL050C
YEL051W
YEL052W
YEL053C
YEL056W
YEL057C
YEL058W
YEL059C-A
YEL060C
YEL062W
YEL063C
YEL064C
YEL066W
YEL072W
YER001W
YER006W
YER009W
YER010C
YER011W
YER012W
YER013W
YER014C-A
YER018C
YER019C-A
YER019W
YER020W
YER021W
YER022W
YER023W
YER028C
YER032W
YER034W
YER035W
YER036C
YER037W
YER038C
YER039C-A
YER041W
YER042W
YER043C
YER044C
YER046W
YER048C
YER048W-A
YER050C
YER051W
YER053C
YER054C
YER055C
YER056C-A
YER057C
YER058W
YER059W
YER060W
YER062C
YER063W
YER065C
YER066W
YER067W
YER069W
YER070W
YER071C
YER074W-A
YER076C
YER077C
YER078C
YER079W
YER080W
YER081W
YER082C
YER083C
YER085C
YER086W
YER087W
YER089C
YER091C
YER092W
YER094C
YER096W
YER098W
YER106W
YER107C
YER109C
YER111C
YER113C
YER115C
YER116C
YER124C
YER127W
YER128W
YER130C
YER134C
YER140W
YER141W
YER142C
YER143W
YER146W
YER148W
YER150W
YER151C
YER153C
YER154W
YER156C
YER157W
YER158C
YER159C
YER161C
YER163C
YER168C
YER169W
YER171W
YER173W
YER174C
YER175C
YER175W-A
YER177W
YER179W
YER180C
YER180C-A
YER182W
YER183C
YER185W
YER186C
YFL001W
YFL002C
YFL005W
YFL009W
YFL010C
YFL013C
YFL014W
YFL016C
YFL017C
YFL018C
YFL022C
YFL026W
YFL028C
YFL029C
YFL038C
YFL040W
YFL041W-A
YFL042C
YFL045C
YFL047W
YFL049W
YFL050C
YFL051C
YFL052W
YFL054C
YFL056C
YFL060C
YFR001W
YFR002W
YFR004W
YFR005C
YFR009W
YFR010W
YFR013W
YFR017C
YFR018C
YFR022W
YFR023W
YFR024C-A
YFR026C
YFR027W
YFR031C
YFR032C
YFR032C-B
YFR033C
YFR034C
YFR036W
YFR037C
YFR039C
YFR040W
YFR042W
YFR044C
YFR046C
YFR047C
YFR048W
YFR050C
YFR051C
YFR053C
YGL001C
YGL004C
YGL005C
YGL006W
YGL006W-A
YGL009C
YGL010W
YGL011C
YGL012W
YGL013C
YGL017W
YGL019W
YGL021W
YGL025C
YGL026C
YGL029W
YGL032C
YGL037C
YGL038C
YGL039W
YGL041C-B
YGL043W
YGL045W
YGL048C
YGL049C
YGL050W
YGL051W
YGL053W
YGL054C
YGL056C
YGL057C
YGL058W
YGL059W
YGL060W
YGL061C
YGL062W
YGL063W
YGL064C
YGL065C
YGL067W
YGL070C
YGL075C
YGL077C
YGL078C
YGL079W
YGL082W
YGL083W
YGL086W
YGL089C
YGL090W
YGL091C
YGL093W
YGL095C
YGL096W
YGL098W
YGL099W
YGL101W
YGL103W
YGL105W
YGL107C
YGL108C
YGL112C
YGL117W
YGL121C
YGL124C
YGL127C
YGL135W
YGL138C
YGL143C
YGL144C
YGL146C
YGL151W
YGL153W
YGL155W
YGL156W
YGL158W
YGL159W
YGL161C
YGL164C
YGL166W
YGL167C
YGL168W
YGL169W
YGL172W
YGL174W
YGL175C
YGL176C
YGL179C
YGL188C-A
YGL194C
YGL197W
YGL201C
YGL207W
YGL208W
YGL209W
YGL210W
YGL212W
YGL213C
YGL221C
YGL222C
YGL226C-A
YGL228W
YGL233W
YGL234W
YGL235W
YGL240W
YGL242C
YGL243W
YGL245W
YGL246C
YGL248W
YGL249W
YGL250W
YGL252C
YGL253W
YGL254W
YGL257C
YGL258W
YGL259W
YGL261C
YGL262W
YGL263W
YGR002C
YGR003W
YGR004W
YGR005C
YGR008C
YGR009C
YGR010W
YGR013W
YGR016W
YGR017W
YGR028W
YGR029W
YGR030C
YGR031W
YGR033C
YGR034W
YGR035W-A
YGR036C
YGR038W
YGR041W
YGR042W
YGR043C
YGR045C
YGR046W
YGR047C
YGR048W
YGR049W
YGR055W
YGR056W
YGR057C
YGR063C
YGR065C
YGR067C
YGR068C
YGR072W
YGR074W
YGR076C
YGR077C
YGR079W
YGR080W
YGR084C
YGR088W
YGR093W
YGR095C
YGR096W
YGR099W
YGR100W
YGR101W
YGR102C
YGR104C
YGR105W
YGR106C
YGR108W
YGR109C
YGR111W
YGR113W
YGR117C
YGR119C
YGR120C
YGR121W-A
YGR122W
YGR124W
YGR126W
YGR127W
YGR128C
YGR129W
YGR132C
YGR133W
YGR136W
YGR140W
YGR142W
YGR145W
YGR146C
YGR146C-A
YGR147C
YGR148C
YGR150C
YGR152C
YGR153W
YGR155W
YGR157W
YGR158C
YGR161W-C
YGR163W
YGR167W
YGR168C
YGR169C
YGR169C-A
YGR171C
YGR172C
YGR173W
YGR174C
YGR174W-A
YGR175C
YGR177C
YGR181W
YGR185C
YGR187C
YGR188C
YGR189C
YGR193C
YGR194C
YGR195W
YGR197C
YGR199W
YGR200C
YGR201C
YGR202C
YGR204C-A
YGR204W
YGR205W
YGR207C
YGR208W
YGR209C
YGR210C
YGR211W
YGR214W
YGR216C
YGR220C
YGR223C
YGR224W
YGR225W
YGR226C
YGR227W
YGR230W
YGR231C
YGR232W
YGR236C
YGR237C
YGR238C
YGR243W
YGR244C
YGR246C
YGR249W
YGR250C
YGR252W
YGR253C
YGR262C
YGR263C
YGR264C
YGR268C
YGR271C-A
YGR273C
YGR282C
YGR283C
YGR284C
YGR288W
YGR295C
YHL001W
YHL002W
YHL003C
YHL004W
YHL011C
YHL012W
YHL014C
YHL015W
YHL019C
YHL021C
YHL022C
YHL027W
YHL031C
YHL032C
YHL043W
YHL047C
YHR004C
YHR005C
YHR007C-A
YHR008C
YHR009C
YHR011W
YHR012W
YHR013C
YHR014W
YHR017W
YHR018C
YHR021W-A
YHR022C
YHR022C-A
YHR024C
YHR025W
YHR026W
YHR028C
YHR029C
YHR030C
YHR031C
YHR032W
YHR034C
YHR035W
YHR036W
YHR039C
YHR042W
YHR044C
YHR047C
YHR048W
YHR049W
YHR051W
YHR058C
YHR060W
YHR061C
YHR064C
YHR065C
YHR066W
YHR067W
YHR071W
YHR072W-A
YHR074W
YHR075C
YHR076W
YHR077C
YHR081W
YHR083W
YHR086W-A
YHR087W
YHR090C
YHR092C
YHR097C
YHR101C
YHR107C
YHR108W
YHR109W
YHR110W
YHR111W
YHR112C
YHR113W
YHR114W
YHR118C
YHR120W
YHR121W
YHR122W
YHR123W
YHR126C
YHR127W
YHR129C
YHR131C
YHR132C
YHR132W-A
YHR133C
YHR134W
YHR135C
YHR136C
YHR138C
YHR139C
YHR140W
YHR143W
YHR143W-A
YHR148W
YHR149C
YHR150W
YHR151C
YHR153C
YHR155W
YHR156C
YHR157W
YHR159W
YHR160C
YHR162W
YHR163W
YHR167W
YHR168W
YHR171W
YHR175W-A
YHR176W
YHR177W
YHR179W
YHR181W
YHR187W
YHR189W
YHR190W
YHR195W
YHR197W
YHR198C
YHR199C
YHR205W
YHR206W
YHR209W
YHR210C
YIL002C
YIL003W
YIL006W
YIL009C-A
YIL009W
YIL010W
YIL014W
YIL016W
YIL020C
YIL023C
YIL024C
YIL029C
YIL035C
YIL040W
YIL044C
YIL046W
YIL046W-A
YIL048W
YIL049W
YIL050W
YIL051C
YIL055C
YIL057C
YIL060W
YIL061C
YIL064W
YIL067C
YIL069C
YIL070C
YIL072W
YIL074C
YIL075C
YIL076W
YIL078W
YIL079C
YIL083C
YIL084C
YIL085C
YIL087C
YIL088C
YIL090W
YIL091C
YIL092W
YIL093C
YIL094C
YIL097W
YIL098C
YIL099W
YIL102C
YIL103W
YIL106W
YIL108W
YIL111W
YIL113W
YIL114C
YIL115C
YIL120W
YIL121W
YIL122W
YIL124W
YIL127C
YIL132C
YIL133C
YIL134C-A
YIL134W
YIL140W
YIL142W
YIL144W
YIL145C
YIL147C
YIL152W
YIL153W
YIL154C
YIL155C
YIL157C
YIL158W
YIL160C
YIL161W
YIL164C
YIR001C
YIR003W
YIR004W
YIR005W
YIR007W
YIR010W
YIR011C
YIR012W
YIR013C
YIR014W
YIR015W
YIR016W
YIR018W
YIR022W
YIR024C
[truncated: 1,681 more rows]

## Sheet: No Effect Genes
BC187_No_Effect_Moby_Genes	BY4743_No_Effect_Moby_Genes	DBVPG1373_No_Effect_Moby_Genes	NCYC3290_No_Effect_Moby_Genes	Y12_No_Effect_Moby_Genes	Y2209_No_Effect_Moby_Genes	Y389_No_Effect_Moby_Genes	Y7568_No_Effect_Moby_Genes	YJM1273_No_Effect_Moby_Genes	YJM1389_No_Effect_Moby_Genes	YJM1592_No_Effect_Moby_Genes	YJM978_No_Effect_Moby_Genes	YPS128_No_Effect_Moby_Genes	YPS163_No_Effect_Moby_Genes
YAL011W	YAL002W	YAL009W	YAL009W	YAL009W	YAL001C	YAL007C	YAL007C	YAL002W	YAL007C	YAL002W	YAL002W	YAL002W	YAL002W
YAL012W	YAL007C	YAL010C	YAL013W	YAL011W	YAL002W	YAL009W	YAL012W	YAL007C	YAL009W	YAL007C	YAL007C	YAL007C	YAL010C
YAL013W	YAL009W	YAL016C-B	YAL015C	YAL015C	YAL007C	YAL010C	YAL015C	YAL011W	YAL010C	YAL009W	YAL010C	YAL009W	YAL013W
YAL016W	YAL011W	YAL018C	YAL018C	YAL016C-B	YAL009W	YAL011W	YAL016W	YAL012W	YAL012W	YAL010C	YAL012W	YAL010C	YAL016W
YAL018C	YAL012W	YAL020C	YAL032C	YAL018C	YAL010C	YAL012W	YAL018C	YAL015C	YAL016W	YAL011W	YAL013W	YAL011W	YAL018C
YAL022C	YAL013W	YAL030W	YAL033W	YAL021C	YAL012W	YAL015C	YAL020C	YAL016C-B	YAL027W	YAL012W	YAL015C	YAL012W	YAL019W
YAL027W	YAL015C	YAL034C	YAL034C	YAL039C	YAL013W	YAL016C-B	YAL022C	YAL016W	YAL028W	YAL013W	YAL016C-B	YAL013W	YAL020C
YAL028W	YAL016W	YAL048C	YAL037C-A	YAL044C	YAL015C	YAL016W	YAL027W	YAL018C	YAL039C	YAL015C	YAL016W	YAL015C	YAL021C
YAL031C	YAL019W	YAL064C-A	YAL039C	YAL055W	YAL016C-B	YAL020C	YAL028W	YAL019W	YAL044C	YAL016W	YAL018C	YAL019W	YAL022C
YAL033W	YAL020C	YAL067C	YAL040C	YAL064C-A	YAL016W	YAL022C	YAL032C	YAL022C	YAL064C-A	YAL018C	YAL019W	YAL020C	YAL028W
YAL037C-A	YAL021C	YAR015W	YAL044C	YAL067C	YAL019W	YAL027W	YAL033W	YAL027W	YAR002C-A	YAL019W	YAL020C	YAL021C	YAL030W
YAL044C	YAL022C	YAR020C	YAL046C	YAL068C	YAL020C	YAL028W	YAL040C	YAL030W	YAR003W	YAL020C	YAL022C	YAL022C	YAL032C
YAL046C	YAL027W	YAR028W	YAL054C	YAR002C-A	YAL021C	YAL030W	YAL044C	YAL033W	YAR015W	YAL021C	YAL027W	YAL027W	YAL034C
YAL054C	YAL031C	YAR029W	YAL055W	YAR020C	YAL022C	YAL032C	YAL048C	YAL034C	YAR020C	YAL022C	YAL028W	YAL028W	YAL037C-A
YAL055W	YAL032C	YAR035W	YAL059W	YAR023C	YAL027W	YAL033W	YAL049C	YAL037C-A	YAR023C	YAL027W	YAL031C	YAL030W	YAL044C
YAL056W	YAL033W	YBL002W	YAL060W	YAR028W	YAL028W	YAL034C	YAL054C	YAL049C	YAR028W	YAL028W	YAL032C	YAL031C	YAL048C
YAL059W	YAL034C	YBL006C	YAL064C-A	YAR029W	YAL031C	YAL037C-A	YAL056W	YAL054C	YBL003C	YAL030W	YAL033W	YAL032C	YAL049C
YAL060W	YAL040C	YBL007C	YAL067C	YBL015W	YAL032C	YAL048C	YAL060W	YAL059W	YBL010C	YAL032C	YAL040C	YAL037C-A	YAL056W
YAL062W	YAL044C	YBL008W-A	YAR015W	YBL018C	YAL033W	YAL049C	YAL062W	YAL060W	YBL011W	YAL033W	YAL044C	YAL044C	YAL059W
YAL064C-A	YAL046C	YBL019W	YAR020C	YBL025W	YAL034C	YAL051W	YAR002C-A	YAL064C-A	YBL013W	YAL034C	YAL046C	YAL046C	YAL062W
YAL067C	YAL048C	YBL026W	YAR035W	YBL040C	YAL037C-A	YAL059W	YAR015W	YAL067C	YBL016W	YAL039C	YAL048C	YAL048C	YAL064C-A
YAL068C	YAL049C	YBL032W	YBL002W	YBL055C	YAL038W	YAL060W	YAR018C	YAR003W	YBL018C	YAL044C	YAL049C	YAL049C	YAL067C
YAR002C-A	YAL051W	YBL040C	YBL003C	YBL068W	YAL039C	YAL062W	YAR027W	YAR015W	YBL021C	YAL049C	YAL054C	YAL054C	YAL068C
YAR003W	YAL060W	YBL050W	YBL006C	YBL069W	YAL044C	YAL067C	YAR029W	YAR028W	YBL025W	YAL054C	YAL055W	YAL059W	YAR002C-A
YAR015W	YAL062W	YBL057C	YBL007C	YBL075C	YAL046C	YAL068C	YAR031W	YAR035W	YBL055C	YAL056W	YAL056W	YAL062W	YAR015W
YAR018C	YAR003W	YBL068W	YBL008W-A	YBL106C	YAL049C	YAR003W	YAR035C-A	YBL002W	YBL056W	YAL059W	YAL059W	YAL064C-A	YAR020C
YAR023C	YAR015W	YBL085W	YBL010C	YBR007C	YAL051W	YAR018C	YBL008W-A	YBL003C	YBL068W	YAL060W	YAL060W	YAL067C	YAR023C
YAR029W	YAR027W	YBL086C	YBL011W	YBR034C	YAL054C	YAR023C	YBL010C	YBL006C	YBL074C	YAL062W	YAL062W	YAL068C	YAR027W
YAR031W	YAR031W	YBL090W	YBL021C	YBR037C	YAL056W	YAR027W	YBL011W	YBL008W	YBL078C	YAL064C-A	YAL064C-A	YAR003W	YAR028W
YBL001C	YAR035W	YBL091C-A	YBL026W	YBR056W-A	YAL059W	YAR028W	YBL015W	YBL008W-A	YBL091C-A	YAR002C-A	YAL067C	YAR015W	YAR031W
YBL002W	YBL002W	YBL102W	YBL029W	YBR058C-A	YAL060W	YAR031W	YBL018C	YBL010C	YBL102W	YAR003W	YAL068C	YAR018C	YAR035C-A
YBL007C	YBL003C	YBL103C	YBL032W	YBR065C	YAL062W	YAR035W	YBL019W	YBL011W	YBL106C	YAR015W	YAR002C-A	YAR020C	YBL009W
YBL008W	YBL006C	YBL105C	YBL040C	YBR070C	YAL067C	YBL001C	YBL024W	YBL013W	YBL107C	YAR018C	YAR015W	YAR023C	YBL021C
YBL010C	YBL008W-A	YBR005W	YBL052C	YBR072C-A	YAR002C-A	YBL002W	YBL027W	YBL016W	YBR002C	YAR020C	YAR018C	YAR027W	YBL025W
YBL011W	YBL009W	YBR018C	YBL055C	YBR085C-A	YAR003W	YBL005W	YBL029W	YBL025W	YBR005W	YAR023C	YAR027W	YAR029W	YBL029W
YBL015W	YBL010C	YBR022W	YBL056W	YBR104W	YAR015W	YBL008W	YBL040C	YBL029W	YBR013C	YAR027W	YAR028W	YAR031W	YBL040C
YBL016W	YBL011W	YBR024W	YBL057C	YBR107C	YAR018C	YBL008W-A	YBL045C	YBL040C	YBR018C	YAR035W	YAR029W	YBL002W	YBL045C
YBL018C	YBL013W	YBR026C	YBL066C	YBR110W	YAR020C	YBL009W	YBL050W	YBL050W	YBR020W	YBL005W	YAR031W	YBL003C	YBL050W
YBL019W	YBL015W	YBR029C	YBL067C	YBR111W-A	YAR027W	YBL010C	YBL054W	YBL052C	YBR029C	YBL006C	YAR035C-A	YBL006C	YBL052C
YBL021C	YBL016W	YBR037C	YBL068W	YBR128C	YAR028W	YBL011W	YBL055C	YBL055C	YBR030W	YBL007C	YBL001C	YBL008W	YBL055C
YBL024W	YBL018C	YBR047W	YBL069W	YBR152W	YAR035C-A	YBL013W	YBL056W	YBL056W	YBR034C	YBL008W	YBL002W	YBL008W-A	YBL056W
YBL028C	YBL021C	YBR050C	YBL078C	YBR173C	YAR035W	YBL015W	YBL057C	YBL057C	YBR037C	YBL008W-A	YBL003C	YBL009W	YBL057C
YBL029W	YBL024W	YBR058C-A	YBL079W	YBR180W	YBL002W	YBL019W	YBL059W	YBL064C	YBR041W	YBL011W	YBL005W	YBL010C	YBL061C
YBL031W	YBL026W	YBR061C	YBL086C	YBR200W	YBL003C	YBL021C	YBL061C	YBL067C	YBR043C	YBL013W	YBL006C	YBL011W	YBL064C
YBL050W	YBL028C	YBR063C	YBL091C	YBR200W-A	YBL006C	YBL024W	YBL064C	YBL068W	YBR044C	YBL015W	YBL008W-A	YBL013W	YBL075C
YBL054W	YBL029W	YBR066C	YBL091C-A	YBR201W	YBL008W-A	YBL027W	YBL067C	YBL069W	YBR045C	YBL016W	YBL009W	YBL015W	YBL078C
YBL055C	YBL031W	YBR076W	YBL103C	YBR213W	YBL009W	YBL028C	YBL068W	YBL071W-A	YBR046C	YBL018C	YBL010C	YBL016W	YBL079W
YBL056W	YBL045C	YBR091C	YBR001C	YBR216C	YBL011W	YBL031W	YBL069W	YBL081W	YBR056W-A	YBL019W	YBL011W	YBL019W	YBL081W
YBL057C	YBL050W	YBR093C	YBR002C	YBR228W	YBL013W	YBL032W	YBL074C	YBL086C	YBR058C-A	YBL021C	YBL013W	YBL028C	YBL086C
YBL059W	YBL052C	YBR096W	YBR007C	YBR241C	YBL015W	YBL045C	YBL081W	YBL090W	YBR061C	YBL024W	YBL015W	YBL029W	YBL090W
YBL064C	YBL054W	YBR107C	YBR011C	YBR242W	YBL016W	YBL050W	YBL087C	YBL091C-A	YBR062C	YBL025W	YBL016W	YBL045C	YBL091C-A
YBL066C	YBL056W	YBR110W	YBR013C	YBR268W	YBL018C	YBL055C	YBL090W	YBL102W	YBR063C	YBL026W	YBL018C	YBL052C	YBL102W
YBL067C	YBL059W	YBR120C	YBR018C	YBR274W	YBL019W	YBL056W	YBL091C	YBL104C	YBR065C	YBL028C	YBL019W	YBL056W	YBL105C
YBL068W	YBL061C	YBR130C	YBR022W	YBR293W	YBL021C	YBL057C	YBL091C-A	YBL105C	YBR071W	YBL029W	YBL021C	YBL057C	YBL106C
YBL069W	YBL064C	YBR133C	YBR026C	YCL001W	YBL024W	YBL059W	YBL093C	YBL106C	YBR076W	YBL031W	YBL024W	YBL059W	YBL107C
YBL071W-A	YBL066C	YBR137W	YBR028C	YCL001W-A	YBL025W	YBL064C	YBR001C	YBL107C	YBR077C	YBL032W	YBL026W	YBL067C	YBR001C
YBL074C	YBL069W	YBR151W	YBR029C	YCL004W	YBL026W	YBL067C	YBR002C	YBR002C	YBR087W	YBL045C	YBL027W	YBL068W	YBR007C
YBL075C	YBL071W-A	YBR155W	YBR030W	YCL011C	YBL028C	YBL068W	YBR005W	YBR005W	YBR093C	YBL050W	YBL028C	YBL069W	YBR011C
YBL078C	YBL081W	YBR156C	YBR039W	YCL016C	YBL031W	YBL072C	YBR007C	YBR009C	YBR104W	YBL051C	YBL029W	YBL074C	YBR018C
YBL081W	YBL085W	YBR164C	YBR041W	YCL026C-B	YBL040C	YBL074C	YBR009C	YBR011C	YBR105C	YBL052C	YBL031W	YBL081W	YBR024W
YBL086C	YBL086C	YBR167C	YBR043C	YCL035C	YBL045C	YBL075C	YBR011C	YBR018C	YBR106W	YBL055C	YBL040C	YBL085W	YBR028C
YBL087C	YBL087C	YBR177C	YBR045C	YCL036W	YBL050W	YBL081W	YBR022W	YBR020W	YBR107C	YBL056W	YBL045C	YBL086C	YBR044C
YBL090W	YBL090W	YBR186W	YBR060C	YCL050C	YBL054W	YBL085W	YBR025C	YBR022W	YBR108W	YBL057C	YBL054W	YBL091C	YBR045C
YBL091C	YBL091C-A	YBR195C	YBR062C	YCR007C	YBL055C	YBL087C	YBR028C	YBR026C	YBR110W	YBL059W	YBL055C	YBL091C-A	YBR047W
YBL093C	YBL104C	YBR204C	YBR070C	YCR020C	YBL056W	YBL090W	YBR029C	YBR028C	YBR111C	YBL061C	YBL056W	YBL106C	YBR050C
YBL104C	YBL105C	YBR205W	YBR071W	YCR037C	YBL057C	YBL091C	YBR037C	YBR034C	YBR111W-A	YBL064C	YBL057C	YBR001C	YBR060C
YBR007C	YBR002C	YBR216C	YBR076W	YCR043C	YBL059W	YBL091C-A	YBR039W	YBR037C	YBR120C	YBL066C	YBL059W	YBR007C	YBR062C
YBR011C	YBR009C	YBR217W	YBR077C	YCR048W	YBL061C	YBL102W	YBR040W	YBR039W	YBR128C	YBL067C	YBL061C	YBR013C	YBR067C
YBR013C	YBR011C	YBR234C	YBR082C	YCR054C	YBL066C	YBL103C	YBR041W	YBR041W	YBR132C	YBL078C	YBL064C	YBR020W	YBR068C
YBR020W	YBR013C	YBR236C	YBR085C-A	YCR059C	YBL067C	YBL104C	YBR043C	YBR043C	YBR147W	YBL081W	YBL066C	YBR026C	YBR070C
YBR022W	YBR018C	YBR242W	YBR088C	YCR061W	YBL068W	YBL106C	YBR050C	YBR045C	YBR152W	YBL086C	YBL067C	YBR034C	YBR076W
YBR028C	YBR024W	YBR244W	YBR093C	YCR067C	YBL069W	YBL107C	YBR058C-A	YBR050C	YBR160W	YBL091C	YBL068W	YBR040W	YBR077C
YBR029C	YBR026C	YBR250W	YBR095C	YCR073W-A	YBL071W-A	YBR001C	YBR060C	YBR055C	YBR164C	YBL091C-A	YBL069W	YBR041W	YBR084W
YBR037C	YBR030W	YBR258C	YBR098W-1	YCR076C	YBL072C	YBR002C	YBR061C	YBR056W-A	YBR165W	YBL102W	YBL071W-A	YBR043C	YBR085C-A
YBR039W	YBR039W	YBR271W	YBR106W	YCR090C	YBL074C	YBR005W	YBR062C	YBR058C-A	YBR173C	YBL103C	YBL074C	YBR045C	YBR085W
YBR045C	YBR041W	YBR276C	YBR107C	YCR095W-A	YBL075C	YBR007C	YBR063C	YBR060C	YBR176W	YBL104C	YBL079W	YBR047W	YBR088C
YBR052C	YBR044C	YBR284W	YBR108W	YDL025C	YBL078C	YBR011C	YBR065C	YBR062C	YBR186W	YBL105C	YBL081W	YBR050C	YBR090C
YBR056W	YBR045C	YBR286W	YBR111W-A	YDL037C	YBL081W	YBR018C	YBR067C	YBR063C	YBR196C-B	YBL106C	YBL085W	YBR052C	YBR093C
YBR056W-A	YBR046C	YBR294W	YBR126C	YDL053C	YBL085W	YBR020W	YBR068C	YBR066C	YBR199W	YBL107C	YBL087C	YBR053C	YBR095C
YBR058C-A	YBR047W	YBR301W	YBR130C	YDL077C	YBL086C	YBR022W	YBR069C	YBR072W	YBR204C	YBR001C	YBL090W	YBR056W-A	YBR098W
YBR060C	YBR048W	YCL001W-A	YBR132C	YDL080C	YBL087C	YBR024W	YBR070C	YBR076W	YBR211C	YBR002C	YBL091C	YBR058C-A	YBR102C
YBR062C	YBR050C	YCL001W-B	YBR133C	YDL090C	YBL090W	YBR028C	YBR071W	YBR085C-A	YBR212W	YBR005W	YBL092W	YBR062C	YBR107C
YBR067C	YBR052C	YCL026C-B	YBR141C	YDL091C	YBL091C	YBR039W	YBR072W	YBR087W	YBR213W	YBR007C	YBL093C	YBR063C	YBR108W
YBR076W	YBR053C	YCL035C	YBR155W	YDL092W	YBL091C-A	YBR040W	YBR077C	YBR088C	YBR216C	YBR009C	YBL102W	YBR065C	YBR111W-A
YBR077C	YBR055C	YCL063W	YBR157C	YDL097C	YBL092W	YBR041W	YBR082C	YBR092C	YBR223C	YBR010W	YBL103C	YBR066C	YBR120C
YBR082C	YBR056W	YCL064C	YBR167C	YDL099W	YBL103C	YBR043C	YBR085C-A	YBR093C	YBR228W	YBR011C	YBL104C	YBR067C	YBR132C
YBR084C-A	YBR056W-A	YCR007C	YBR171W	YDL101C	YBL104C	YBR045C	YBR091C	YBR095C	YBR241C	YBR013C	YBL105C	YBR068C	YBR133C
YBR084W	YBR058C-A	YCR009C	YBR173C	YDL123W	YBL106C	YBR046C	YBR093C	YBR102C	YBR244W	YBR018C	YBL107C	YBR071W	YBR137W
YBR085W	YBR060C	YCR016W	YBR177C	YDL138W	YBL107C	YBR047W	YBR096W	YBR104W	YBR246W	YBR020W	YBR002C	YBR072W	YBR138C
YBR087W	YBR062C	YCR019W	YBR181C	YDL159W-A	YBR002C	YBR048W	YBR104W	YBR105C	YBR253W	YBR022W	YBR005W	YBR076W	YBR139W
YBR090C	YBR067C	YCR027C	YBR182C	YDL160C-A	YBR005W	YBR053C	YBR106W	YBR107C	YBR258C	YBR024W	YBR007C	YBR077C	YBR146W
YBR091C	YBR068C	YCR047C	YBR185C	YDL180W	YBR007C	YBR055C	YBR111C	YBR111C	YBR267W	YBR026C	YBR011C	YBR083W	YBR147W
YBR092C	YBR069C	YCR054C	YBR186W	YDL189W	YBR009C	YBR056W	YBR111W-A	YBR111W-A	YBR274W	YBR028C	YBR013C	YBR084W	YBR149W
YBR093C	YBR070C	YCR059C	YBR196C-B	YDL202W	YBR011C	YBR058C-A	YBR126C	YBR130C	YBR276C	YBR029C	YBR018C	YBR085C-A	YBR155W
YBR095C	YBR072C-A	YCR060W	YBR198C	YDL213C	YBR013C	YBR061C	YBR130C	YBR132C	YBR282W	YBR037C	YBR020W	YBR085W	YBR157C
YBR096W	YBR072W	YCR061W	YBR200W	YDL224C	YBR018C	YBR062C	YBR132C	YBR133C	YBR284W	YBR040W	YBR022W	YBR087W	YBR165W
YBR098W	YBR084C-A	YCR063W	YBR201W	YDL227C	YBR020W	YBR063C	YBR133C	YBR137W	YBR290W	YBR041W	YBR024W	YBR088C	YBR170C
YBR111C	YBR090C	YCR067C	YBR205W	YDL230W	YBR022W	YBR067C	YBR138C	YBR139W	YBR291C	YBR043C	YBR025C	YBR090C	YBR171W
YBR117C	YBR092C	YCR075W-A	YBR211C	YDL241W	YBR024W	YBR070C	YBR141C	YBR141C	YBR293W	YBR044C	YBR026C	YBR091C	YBR180W
YBR129C	YBR093C	YCR076C	YBR212W	YDR020C	YBR025C	YBR071W	YBR146W	YBR145W	YBR295W	YBR045C	YBR029C	YBR096W	YBR185C
YBR131W	YBR095C	YCR083W	YBR213W	YDR044W	YBR026C	YBR072C-A	YBR147W	YBR146W	YBR296C-A	YBR046C	YBR037C	YBR098W	YBR186W
YBR133C	YBR096W	YCR087C-A	YBR214W	YDR058C	YBR028C	YBR072W	YBR160W	YBR147W	YBR301W	YBR047W	YBR040W	YBR098W-1	YBR193C
YBR138C	YBR098W	YCR091W	YBR215W	YDR079W	YBR029C	YBR076W	YBR163W	YBR149W	YCL001W-B	YBR052C	YBR044C	YBR102C	YBR196C-B
YBR146W	YBR102C	YCR095W-A	YBR216C	YDR101C	YBR030W	YBR077C	YBR164C	YBR152W	YCL002C	YBR053C	YBR045C	YBR104W	YBR198C
YBR147W	YBR105C	YCR105W	YBR221W-A	YDR103W	YBR034C	YBR083W	YBR166C	YBR156C	YCL004W	YBR056W-A	YBR046C	YBR105C	YBR199W
YBR149W	YBR106W	YDL001W	YBR228W	YDR115W	YBR037C	YBR084C-A	YBR170C	YBR157C	YCL010C	YBR060C	YBR047W	YBR107C	YBR207W
YBR152W	YBR107C	YDL007W	YBR230W-A	YDR120C	YBR039W	YBR084W	YBR171W	YBR165W	YCL011C	YBR061C	YBR050C	YBR108W	YBR216C
YBR155W	YBR108W	YDL018C	YBR233W	YDR125C	YBR040W	YBR085C-A	YBR175W	YBR167C	YCL026C-B	YBR062C	YBR053C	YBR111W-A	YBR225W
YBR160W	YBR111C	YDL022W	YBR234C	YDR147W	YBR041W	YBR085W	YBR182C	YBR170C	YCL042W	YBR063C	YBR055C	YBR120C	YBR229C
YBR161W	YBR111W-A	YDL046W	YBR242W	YDR148C	YBR043C	YBR092C	YBR185C	YBR171W	YCL051W	YBR065C	YBR056W	YBR126C	YBR230W-A
YBR166C	YBR117C	YDL053C	YBR244W	YDR158W	YBR044C	YBR093C	YBR186W	YBR175W	YCL056C	YBR066C	YBR058C-A	YBR130C	YBR236C
YBR170C	YBR120C	YDL059C	YBR250W	YDR163W	YBR045C	YBR095C	YBR191W	YBR180W	YCL063W	YBR067C	YBR060C	YBR132C	YBR239C
YBR173C	YBR128C	YDL077C	YBR254C	YDR165W	YBR046C	YBR096W	YBR199W	YBR181C	YCR002C	YBR070C	YBR061C	YBR137W	YBR244W
YBR175W	YBR130C	YDL078C	YBR257W	YDR169C-A	YBR047W	YBR098W	YBR200W	YBR182C	YCR003W	YBR071W	YBR062C	YBR138C	YBR246W
YBR177C	YBR132C	YDL085C-A	YBR258C	YDR200C	YBR048W	YBR098W-1	YBR201W	YBR183W	YCR007C	YBR072C-A	YBR063C	YBR146W	YBR249C
YBR181C	YBR133C	YDL085W	YBR273C	YDR228C	YBR050C	YBR105C	YBR204C	YBR186W	YCR016W	YBR072W	YBR065C	YBR147W	YBR250W
YBR182C	YBR138C	YDL097C	YBR274W	YDR244W	YBR052C	YBR106W	YBR205W	YBR193C	YCR024C	YBR076W	YBR066C	YBR149W	YBR251W
YBR185C	YBR139W	YDL100C	YBR291C	YDR287W	YBR053C	YBR107C	YBR207W	YBR196C-B	YCR028C	YBR077C	YBR067C	YBR151W	YBR253W
YBR191W	YBR141C	YDL102W	YBR294W	YDR304C	YBR055C	YBR108W	YBR211C	YBR199W	YCR035C	YBR080C	YBR070C	YBR155W	YBR254C
YBR193C	YBR145W	YDL105W	YBR296C-A	YDR311W	YBR056W	YBR110W	YBR212W	YBR205W	YCR036W	YBR082C	YBR072C-A	YBR156C	YBR257W
YBR195C	YBR146W	YDL107W	YCL001W	YDR314C	YBR058C-A	YBR111W-A	YBR214W	YBR210W	YCR043C	YBR085C-A	YBR076W	YBR157C	YBR258C
YBR198C	YBR151W	YDL110C	YCL001W-A	YDR315C-2	YBR060C	YBR128C	YBR215W	YBR212W	YCR044C	YBR085W	YBR077C	YBR161W	YBR267W
YBR199W	YBR155W	YDL114W	YCL004W	YDR317W	YBR061C	YBR130C	YBR217W	YBR217W	YCR054C	YBR087W	YBR080C	YBR164C	YBR268W
YBR200W	YBR156C	YDL120W	YCL010C	YDR322W	YBR062C	YBR137W	YBR221C	YBR221W-A	YCR061W	YBR088C	YBR082C	YBR166C	YBR271W
YBR201W	YBR161W	YDL123W	YCL016C	YDR328C	YBR065C	YBR138C	YBR223C	YBR225W	YCR069W	YBR090C	YBR084C-A	YBR167C	YBR273C
YBR202W	YBR163W	YDL143W	YCL026C-A	YDR348C	YBR067C	YBR141C	YBR228W	YBR227C	YCR075W-A	YBR091C	YBR084W	YBR173C	YBR274W
YBR205W	YBR165W	YDL159W	YCL026C-B	YDR350C	YBR068C	YBR145W	YBR230W-A	YBR229C	YCR076C	YBR093C	YBR085C-A	YBR175W	YBR276C
YBR211C	YBR166C	YDL160C-A	YCL035C	YDR357C	YBR069C	YBR146W	YBR236C	YBR234C	YCR087C-A	YBR095C	YBR085W	YBR176W	YBR278W
YBR214W	YBR170C	YDL166C	YCL036W	YDR379C-A	YBR070C	YBR147W	YBR239C	YBR236C	YCR090C	YBR096W	YBR087W	YBR181C	YBR281C
YBR215W	YBR171W	YDL168W	YCL051W	YDR387C	YBR072W	YBR149W	YBR244W	YBR244W	YCR101C	YBR098W	YBR088C	YBR182C	YBR282W
YBR227C	YBR173C	YDL175C	YCL052C	YDR394W	YBR076W	YBR151W	YBR246W	YBR249C	YDL005C	YBR098W-1	YBR091C	YBR185C	YBR284W
YBR228W	YBR175W	YDL176W	YCL056C	YDR446W	YBR077C	YBR155W	YBR249C	YBR250W	YDL006W	YBR102C	YBR093C	YBR186W	YBR293W
YBR233W	YBR176W	YDL183C	YCL057C-A	YDR465C	YBR080C	YBR156C	YBR251W	YBR251W	YDL007W	YBR104W	YBR095C	YBR193C	YBR294W
YBR234C	YBR182C	YDL189W	YCL061C	YDR490C	YBR082C	YBR164C	YBR258C	YBR253W	YDL017W	YBR105C	YBR096W	YBR196C-B	YBR296C-A
YBR244W	YBR185C	YDL199C	YCL063W	YDR498C	YBR083W	YBR165W	YBR268W	YBR254C	YDL020C	YBR106W	YBR098W-1	YBR198C	YBR299W
YBR246W	YBR186W	YDL203C	YCL064C	YDR499W	YBR084C-A	YBR166C	YBR271W	YBR258C	YDL025C	YBR110W	YBR102C	YBR205W	YBR301W
YBR249C	YBR191W	YDL213C	YCR007C	YDR515W	YBR084W	YBR170C	YBR273C	YBR265W	YDL037C	YBR111C	YBR107C	YBR207W	YCL016C
YBR250W	YBR193C	YDL227C	YCR021C	YDR528W	YBR085C-A	YBR171W	YBR274W	YBR267W	YDL046W	YBR117C	YBR108W	YBR210W	YCL030C
YBR251W	YBR196C	YDL230W	YCR024C	YDR529C	YBR085W	YBR176W	YBR276C	YBR271W	YDL053C	YBR120C	YBR110W	YBR211C	YCL036W
YBR257W	YBR198C	YDL237W	YCR036W	YEL001C	YBR087W	YBR177C	YBR281C	YBR274W	YDL055C	YBR126C	YBR111C	YBR214W	YCL052C
YBR263W	YBR199W	YDR003W-A	YCR060W	YEL039C	YBR088C	YBR180W	YBR282W	YBR276C	YDL061C	YBR129C	YBR111W-A	YBR215W	YCL061C
YBR267W	YBR200W	YDR013W	YCR061W	YEL052W	YBR090C	YBR181C	YBR283C	YBR278W	YDL064W	YBR130C	YBR117C	YBR216C	YCL064C
YBR268W	YBR201W	YDR032C	YCR067C	YEL057C	YBR091C	YBR182C	YBR286W	YBR281C	YDL067C	YBR132C	YBR120C	YBR217W	YCR016W
YBR271W	YBR202W	YDR049W	YCR069W	YEL059C-A	YBR092C	YBR183W	YBR293W	YBR284W	YDL077C	YBR133C	YBR126C	YBR221C	YCR019W
YBR273C	YBR205W	YDR055W	YCR073W-A	YEL062W	YBR095C	YBR185C	YBR299W	YBR291C	YDL078C	YBR137W	YBR129C	YBR225W	YCR020C
YBR274W	YBR207W	YDR056C	YCR075W-A	YEL066W	YBR096W	YBR188C	YBR301W	YBR293W	YDL089W	YBR139W	YBR130C	YBR227C	YCR024C
YBR283C	YBR211C	YDR059C	YCR076C	YEL072W	YBR098W	YBR193C	YCL001W	YBR294W	YDL092W	YBR141C	YBR131W	YBR228W	YCR027C
YBR286W	YBR212W	YDR073W	YCR077C	YER010C	YBR098W-1	YBR196C-B	YCL002C	YBR295W	YDL099W	YBR145W	YBR133C	YBR236C	YCR043C
YBR291C	YBR215W	YDR079C-A	YCR087C-A	YER023W	YBR104W	YBR198C	YCL004W	YBR299W	YDL101C	YBR146W	YBR137W	YBR239C	YCR045C
YBR299W	YBR216C	YDR083W	YCR090C	YER033C	YBR105C	YBR199W	YCL011C	YCL001W	YDL107W	YBR147W	YBR138C	YBR244W	YCR046C
YBR301W	YBR221W-A	YDR091C	YCR095C	YER046W	YBR106W	YBR200W	YCL017C	YCL004W	YDL113C	YBR149W	YBR139W	YBR246W	YCR048W
YCL001W	YBR223C	YDR103W	YCR095W-A	YER053C-A	YBR107C	YBR200W-A	YCL025C	YCL011C	YDL114W	YBR151W	YBR141C	YBR249C	YCR054C
YCL001W-A	YBR225W	YDR109C	YCR099C	YER054C	YBR110W	YBR204C	YCL026C-B	YCL016C	YDL116W	YBR152W	YBR145W	YBR250W	YCR059C
YCL004W	YBR229C	YDR110W	YCR107W	YER089C	YBR111C	YBR205W	YCL036W	YCL017C	YDL120W	YBR155W	YBR147W	YBR253W	YCR060W
YCL010C	YBR236C	YDR115W	YDL004W	YER106W	YBR111W-A	YBR207W	YCL047C	YCL036W	YDL121C	YBR156C	YBR149W	YBR254C	YCR061W
YCL011C	YBR239C	YDR116C	YDL005C	YER111C	YBR117C	YBR210W	YCL051W	YCL052C	YDL123W	YBR160W	YBR151W	YBR258C	YCR067C
YCL016C	YBR241C	YDR118W	YDL008W	YER141W	YBR120C	YBR212W	YCL052C	YCL055W	YDL129W	YBR161W	YBR155W	YBR259W	YCR069W
YCL017C	YBR244W	YDR121W	YDL018C	YER150W	YBR126C	YBR213W	YCL055W	YCL056C	YDL130W-A	YBR164C	YBR156C	YBR265W	YCR071C
YCL025C	YBR245C	YDR138W	YDL024C	YER168C	YBR128C	YBR214W	YCL063W	YCL064C	YDL138W	YBR165W	YBR160W	YBR271W	YCR079W
YCL030C	YBR246W	YDR145W	YDL028C	YFL005W	YBR129C	YBR215W	YCL064C	YCR005C	YDL150W	YBR166C	YBR161W	YBR273C	YCR083W
YCL055W	YBR250W	YDR152W	YDL030W	YFL017C	YBR130C	YBR216C	YCR002C	YCR007C	YDL156W	YBR167C	YBR163W	YBR274W	YCR090C
YCL064C	YBR253W	YDR156W	YDL036C	YFL026W	YBR132C	YBR217W	YCR005C	YCR009C	YDL160C-A	YBR170C	YBR166C	YBR278W	YCR091W
YCR003W	YBR258C	YDR162C	YDL037C	YFL027C	YBR133C	YBR221C	YCR007C	YCR019W	YDL176W	YBR171W	YBR167C	YBR281C	YCR101C
YCR007C	YBR259W	YDR163W	YDL044C	YFL051C	YBR138C	YBR221W-A	YCR012W	YCR024C	YDL177C	YBR175W	YBR170C	YBR284W	YCR105W
YCR012W	YBR262C	YDR171W	YDL048C	YFR011C	YBR139W	YBR225W	YCR020C	YCR027C	YDL179W	YBR176W	YBR172C	YBR286W	YCR107W
YCR019W	YBR264C	YDR172W	YDL053C	YFR017C	YBR141C	YBR228W	YCR020C-A	YCR035C	YDL180W	YBR181C	YBR173C	YBR290W	YDL003W
YCR020C	YBR267W	YDR178W	YDL055C	YFR023W	YBR146W	YBR229C	YCR027C	YCR036W	YDL183C	YBR182C	YBR175W	YBR291C	YDL006W
YCR020C-A	YBR271W	YDR179W-A	YDL056W	YFR043C	YBR147W	YBR230W-A	YCR028C	YCR037C	YDL193W	YBR183W	YBR176W	YBR293W	YDL007W
YCR021C	YBR273C	YDR181C	YDL057W	YGL006W-A	YBR149W	YBR234C	YCR035C	YCR046C	YDL194W	YBR185C	YBR180W	YBR295W	YDL013W
YCR027C	YBR274W	YDR191W	YDL059C	YGL028C	YBR151W	YBR236C	YCR036W	YCR047C	YDL197C	YBR186W	YBR182C	YBR296C-A	YDL017W
YCR028C	YBR276C	YDR202C	YDL064W	YGL041C-B	YBR152W	YBR239C	YCR043C	YCR048W	YDL200C	YBR193C	YBR183W	YBR299W	YDL018C
YCR035C	YBR281C	YDR205W	YDL066W	YGL043W	YBR155W	YBR241C	YCR045C	YCR054C	YDL205C	YBR195C	YBR186W	YBR301W	YDL020C
YCR043C	YBR284W	YDR213W	YDL070W	YGL050W	YBR156C	YBR245C	YCR047C	YCR059C	YDL209C	YBR196C-B	YBR188C	YCL001W	YDL022W
YCR045C	YBR290W	YDR222W	YDL072C	YGL054C	YBR160W	YBR249C	YCR048W	YCR060W	YDL211C	YBR199W	YBR191W	YCL001W-A	YDL024C
YCR046C	YBR293W	YDR228C	YDL085C-A	YGL061C	YBR161W	YBR250W	YCR053W	YCR063W	YDL213C	YBR202W	YBR193C	YCL001W-B	YDL025C
YCR047C	YBR294W	YDR245W	YDL089W	YGL101W	YBR163W	YBR251W	YCR060W	YCR065W	YDL217C	YBR204C	YBR195C	YCL002C	YDL033C
YCR048W	YBR299W	YDR246W	YDL091C	YGL117W	YBR165W	YBR253W	YCR061W	YCR071C	YDL218W	YBR205W	YBR196C-B	YCL010C	YDL037C
YCR053W	YCL001W-A	YDR246W-A	YDL097C	YGL119W	YBR166C	YBR254C	YCR063W	YCR073W-A	YDL219W	YBR207W	YBR198C	YCL011C	YDL044C
YCR059C	YCL002C	YDR252W	YDL102W	YGL145W	YBR167C	YBR258C	YCR071C	YCR075W-A	YDL230W	YBR210W	YBR199W	YCL016C	YDL046W
YCR061W	YCL004W	YDR255C	YDL107W	YGL146C	YBR170C	YBR263W	YCR076C	YCR076C	YDL235C	YBR211C	YBR200W	YCL017C	YDL054C
YCR071C	YCL011C	YDR256C	YDL109C	YGL155W	YBR171W	YBR264C	YCR079W	YCR077C	YDR003W-A	YBR215W	YBR201W	YCL025C	YDL055C
YCR076C	YCL016C	YDR259C	YDL110C	YGL159W	YBR173C	YBR265W	YCR083W	YCR079W	YDR004W	YBR216C	YBR204C	YCL030C	YDL056W
YCR079W	YCL017C	YDR263C	YDL114W	YGL179C	YBR176W	YBR267W	YCR090C	YCR087C-A	YDR013W	YBR217W	YBR205W	YCL036W	YDL064W
YCR091W	YCL025C	YDR265W	YDL115C	YGL188C-A	YBR177C	YBR271W	YCR091W	YCR090C	YDR020C	YBR221C	YBR207W	YCL042W	YDL065C
YCR094W	YCL026C-B	YDR277C	YDL124W	YGL191W	YBR180W	YBR273C	YCR094W	YCR091W	YDR026C	YBR221W-A	YBR210W	YCL047C	YDL067C
YCR095W-A	YCL030C	YDR285W	YDL128W	YGL202W	YBR181C	YBR274W	YCR095C	YCR094W	YDR032C	YBR223C	YBR212W	YCL051W	YDL070W
YCR099C	YCL031C	YDR297W	YDL129W	YGL205W	YBR182C	YBR276C	YCR099C	YCR095W-A	YDR035W	YBR225W	YBR213W	YCL055W	YDL077C
YCR107W	YCL035C	YDR319C	YDL138W	YGL230C	YBR183W	YBR278W	YDL003W	YCR099C	YDR041W	YBR227C	YBR215W	YCL056C	YDL078C
YDL001W	YCL036W	YDR321W	YDL139C	YGL231C	YBR185C	YBR279W	YDL006W	YDL003W	YDR042C	YBR228W	YBR217W	YCL061C	YDL080C
YDL006W	YCL038C	YDR325W	YDL143W	YGL250W	YBR186W	YBR283C	YDL007W	YDL005C	YDR045C	YBR230C	YBR221C	YCL063W	YDL085W
YDL007W	YCL050C	YDR330W	YDL144C	YGL254W	YBR188C	YBR285W	YDL012C	YDL007W	YDR056C	YBR230W-A	YBR223C	YCL064C	YDL089W
YDL012C	YCL056C	YDR339C	YDL148C	YGL258W	YBR191W	YBR286W	YDL013W	YDL008W	YDR058C	YBR233W	YBR225W	YCR002C	YDL092W
YDL033C	YCL061C	YDR348C	YDL156W	YGL261C	YBR193C	YBR291C	YDL017W	YDL012C	YDR059C	YBR234C	YBR227C	YCR003W	YDL098C
YDL044C	YCL064C	YDR353W	YDL160C-A	YGR035W-A	YBR195C	YBR299W	YDL020C	YDL017W	YDR067C	YBR236C	YBR229C	YCR005C	YDL105W
YDL048C	YCR002C	YDR357C	YDL164C	YGR040W	YBR196C	YBR301W	YDL022W	YDL018C	YDR068W	YBR239C	YBR230C	YCR007C	YDL107W
YDL053C	YCR003W	YDR363W-A	YDL166C	YGR045C	YBR198C	YCL001W	YDL024C	YDL024C	YDR070C	YBR242W	YBR233W	YCR009C	YDL113C
YDL054C	YCR005C	YDR364C	YDL167C	YGR063C	YBR199W	YCL001W-A	YDL028C	YDL028C	YDR078C	YBR244W	YBR234C	YCR016W	YDL114W
YDL055C	YCR007C	YDR367W	YDL170W	YGR076C	YBR200W	YCL004W	YDL029W	YDL030W	YDR079W	YBR245C	YBR236C	YCR019W	YDL120W
YDL056W	YCR024C	YDR369C	YDL176W	YGR078C	YBR200W-A	YCL016C	YDL030W	YDL031W	YDR090C	YBR246W	YBR239C	YCR021C	YDL123W
YDL061C	YCR027C	YDR373W	YDL177C	YGR105W	YBR201W	YCL026C-B	YDL036C	YDL033C	YDR092W	YBR249C	YBR246W	YCR024C	YDL129W
YDL063C	YCR028C	YDR377W	YDL178W	YGR132C	YBR202W	YCL031C	YDL044C	YDL036C	YDR099W	YBR250W	YBR249C	YCR027C	YDL138W
YDL065C	YCR035C	YDR381W	YDL179W	YGR143W	YBR204C	YCL035C	YDL048C	YDL044C	YDR100W	YBR251W	YBR250W	YCR028C	YDL141W
YDL066W	YCR037C	YDR387C	YDL180W	YGR146C-A	YBR205W	YCL038C	YDL051W	YDL052C	YDR101C	YBR253W	YBR251W	YCR037C	YDL144C
YDL074C	YCR043C	YDR397C	YDL183C	YGR168C	YBR207W	YCL051W	YDL052C	YDL053C	YDR103W	YBR254C	YBR253W	YCR043C	YDL148C
YDL076C	YCR044C	YDR404C	YDL186W	YGR169C	YBR210W	YCL052C	YDL053C	YDL054C	YDR142C	YBR257W	YBR254C	YCR046C	YDL159W
YDL080C	YCR045C	YDR419W	YDL197C	YGR174W-A	YBR211C	YCL056C	YDL056W	YDL055C	YDR143C	YBR258C	YBR257W	YCR048W	YDL164C
YDL085C-A	YCR046C	YDR422C	YDL199C	YGR180C	YBR214W	YCL064C	YDL059C	YDL056W	YDR145W	YBR259W	YBR258C	YCR053W	YDL165W
YDL085W	YCR053W	YDR434W	YDL200C	YGR187C	YBR215W	YCR003W	YDL061C	YDL059C	YDR147W	YBR262C	YBR259W	YCR059C	YDL166C
YDL089W	YCR054C	YDR437W	YDL202W	YGR188C	YBR216C	YCR005C	YDL063C	YDL064W	YDR148C	YBR263W	YBR262C	YCR063W	YDL168W
YDL092W	YCR059C	YDR446W	YDL204W	YGR195W	YBR217W	YCR007C	YDL065C	YDL065C	YDR152W	YBR264C	YBR263W	YCR069W	YDL174C
YDL097C	YCR060W	YDR451C	YDL211C	YGR210C	YBR221C	YCR016W	YDL066W	YDL066W	YDR156W	YBR265W	YBR264C	YCR071C	YDL175C
YDL099W	YCR061W	YDR473C	YDL213C	YGR211W	YBR221W-A	YCR021C	YDL070W	YDL070W	YDR162C	YBR267W	YBR265W	YCR075W-A	YDL176W
YDL100C	YCR063W	YDR476C	YDL217C	YGR215W	YBR223C	YCR027C	YDL085C-A	YDL077C	YDR165W	YBR271W	YBR267W	YCR076C	YDL177C
YDL101C	YCR065W	YDR479C	YDL218W	YGR227W	YBR225W	YCR028C	YDL085W	YDL089W	YDR169C-A	YBR273C	YBR268W	YCR079W	YDL180W
YDL102W	YCR069W	YDR480W	YDL220C	YGR231C	YBR227C	YCR030C	YDL089W	YDL090C	YDR171W	YBR274W	YBR271W	YCR083W	YDL197C
YDL107W	YCR071C	YDR486C	YDL222C	YGR233C	YBR229C	YCR035C	YDL090C	YDL091C	YDR174W	YBR276C	YBR273C	YCR087C-A	YDL200C
YDL110C	YCR075W-A	YDR490C	YDL227C	YGR236C	YBR230C	YCR036W	YDL092W	YDL092W	YDR177W	YBR278W	YBR276C	YCR090C	YDL211C
YDL113C	YCR076C	YDR494W	YDL230W	YGR237C	YBR230W-A	YCR037C	YDL097C	YDL097C	YDR182W	YBR281C	YBR278W	YCR091W	YDL213C
YDL114W	YCR079W	YDR498C	YDL235C	YGR243W	YBR234C	YCR043C	YDL099W	YDL100C	YDR191W	YBR282W	YBR281C	YCR095C	YDL214C
YDL115C	YCR083W	YDR513W	YDL241W	YGR244C	YBR236C	YCR045C	YDL100C	YDL101C	YDR195W	YBR284W	YBR282W	YCR101C	YDL219W
YDL116W	YCR087C-A	YDR516C	YDL243C	YGR249W	YBR239C	YCR046C	YDL101C	YDL102W	YDR202C	YBR286W	YBR284W	YCR105W	YDR001C
YDL123W	YCR090C	YDR517W	YDR001C	YGR252W	YBR241C	YCR048W	YDL105W	YDL105W	YDR218C	YBR290W	YBR286W	YDL001W	YDR003W
YDL130W-A	YCR095C	YDR520C	YDR003W	YGR253C	YBR242W	YCR053W	YDL107W	YDL107W	YDR222W	YBR291C	YBR290W	YDL004W	YDR003W-A
YDL139C	YCR095W-A	YDR522C	YDR003W-A	YGR268C	YBR245C	YCR054C	YDL113C	YDL110C	YDR225W	YBR293W	YBR291C	YDL005C	YDR035W
YDL144C	YCR105W	YEL001C	YDR013W	YGR277C	YBR246W	YCR059C	YDL114W	YDL113C	YDR228C	YBR294W	YBR293W	YDL006W	YDR037W
YDL148C	YCR107W	YEL004W	YDR032C	YGR286C	YBR249C	YCR063W	YDL115C	YDL114W	YDR242W	YBR295W	YBR299W	YDL007W	YDR041W
YDL150W	YDL001W	YEL006W	YDR041W	YGR295C	YBR250W	YCR067C	YDL127W	YDL116W	YDR244W	YBR296C-A	YBR301W	YDL013W	YDR042C
YDL156W	YDL003W	YEL019C	YDR045C	YHL008C	YBR251W	YCR071C	YDL129W	YDL120W	YDR246W	YBR299W	YCL001W-A	YDL017W	YDR045C
YDL159W	YDL004W	YEL026W	YDR049W	YHL015W	YBR253W	YCR077C	YDL143W	YDL121C	YDR246W-A	YBR301W	YCL001W-B	YDL018C	YDR049W
YDL159W-A	YDL005C	YEL039C	YDR055W	YHL022C	YBR254C	YCR083W	YDL148C	YDL124W	YDR247W	YCL001W	YCL004W	YDL030W	YDR051C
YDL160C-A	YDL006W	YEL042W	YDR056C	YHL027W	YBR257W	YCR090C	YDL150W	YDL128W	YDR249C	YCL001W-A	YCL011C	YDL031W	YDR056C
YDL165W	YDL012C	YEL051W	YDR059C	YHR013C	YBR258C	YCR095C	YDL159W	YDL144C	YDR252W	YCL001W-B	YCL016C	YDL036C	YDR059C
YDL166C	YDL013W	YEL056W	YDR065W	YHR033W	YBR259W	YCR099C	YDL160C	YDL148C	YDR253C	YCL002C	YCL017C	YDL044C	YDR065W
YDL170W	YDL025C	YEL057C	YDR067C	YHR071W	YBR263W	YDL001W	YDL168W	YDL150W	YDR256C	YCL004W	YCL025C	YDL046W	YDR067C
YDL173W	YDL028C	YEL058W	YDR076W	YHR074W	YBR264C	YDL008W	YDL170W	YDL159W	YDR259C	YCL010C	YCL026C-A	YDL048C	YDR068W
YDL175C	YDL029W	YEL060C	YDR078C	YHR111W	YBR265W	YDL012C	YDL173W	YDL165W	YDR261C	YCL011C	YCL029C	YDL053C	YDR070C
YDL176W	YDL033C	YEL063C	YDR079C-A	YHR112C	YBR267W	YDL017W	YDL174C	YDL166C	YDR262W	YCL016C	YCL030C	YDL054C	YDR073W
YDL179W	YDL037C	YER001W	YDR079W	YHR126C	YBR268W	YDL020C	YDL175C	YDL168W	YDR265W	YCL017C	YCL035C	YDL059C	YDR080W
YDL180W	YDL044C	YER009W	YDR087C	YHR127W	YBR271W	YDL022W	YDL176W	YDL170W	YDR266C	YCL025C	YCL036W	YDL061C	YDR081C
YDL183C	YDL046W	YER010C	YDR091C	YHR132W-A	YBR273C	YDL024C	YDL178W	YDL176W	YDR268W	YCL026C-A	YCL038C	YDL064W	YDR082W
YDL190C	YDL048C	YER012W	YDR100W	YHR136C	YBR274W	YDL025C	YDL179W	YDL177C	YDR280W	YCL026C-B	YCL042W	YDL066W	YDR085C
YDL191W	YDL051W	YER013W	YDR103W	YHR137W	YBR276C	YDL029W	YDL180W	YDL178W	YDR285W	YCL031C	YCL047C	YDL067C	YDR107C
YDL193W	YDL052C	YER050C	YDR109C	YHR148W	YBR278W	YDL030W	YDL189W	YDL179W	YDR286C	YCL036W	YCL050C	YDL072C	YDR108W
YDL197C	YDL053C	YER051W	YDR110W	YHR151C	YBR279W	YDL046W	YDL197C	YDL180W	YDR289C	YCL038C	YCL051W	YDL076C	YDR109C
YDL199C	YDL059C	YER053C-A	YDR113C	YHR154W	YBR282W	YDL052C	YDL199C	YDL186W	YDR292C	YCL042W	YCL055W	YDL077C	YDR110W
YDL200C	YDL063C	YER054C	YDR115W	YHR163W	YBR283C	YDL053C	YDL201W	YDL189W	YDR297W	YCL051W	YCL057C-A	YDL080C	YDR118W
YDL203C	YDL065C	YER058W	YDR116C	YHR182W	YBR285W	YDL055C	YDL203C	YDL193W	YDR304C	YCL052C	YCL063W	YDL085C-A	YDR121W
YDL205C	YDL074C	YER066W	YDR120C	YHR189W	YBR286W	YDL056W	YDL204W	YDL197C	YDR305C	YCL055W	YCL064C	YDL085W	YDR137W
YDL209C	YDL076C	YER073W	YDR121W	YHR197W	YBR290W	YDL059C	YDL205C	YDL199C	YDR311W	YCL056C	YCR002C	YDL089W	YDR138W
YDL213C	YDL078C	YER080W	YDR125C	YHR209W	YBR291C	YDL063C	YDL213C	YDL200C	YDR315C	YCL057C-A	YCR003W	YDL092W	YDR143C
YDL217C	YDL082W	YER082C	YDR137W	YIL006W	YBR293W	YDL064W	YDL217C	YDL205C	YDR315C-1	YCL061C	YCR007C	YDL097C	YDR144C
YDL227C	YDL085W	YER083C	YDR142C	YIL010W	YBR296C-A	YDL065C	YDL222C	YDL209C	YDR316W	YCL063W	YCR009C	YDL098C	YDR151C
YDR003W	YDL091C	YER086W	YDR152W	YIL016W	YBR299W	YDL066W	YDL224C	YDL211C	YDR319C	YCL064C	YCR012W	YDL100C	YDR159W
YDR003W-A	YDL092W	YER087W	YDR156W	YIL020C	YCL001W	YDL067C	YDL227C	YDL213C	YDR330W	YCR002C	YCR016W	YDL102W	YDR162C
YDR022C	YDL098C	YER089C	YDR162C	YIL022W	YCL001W-A	YDL074C	YDR003W	YDL217C	YDR347W	YCR003W	YCR019W	YDL107W	YDR163W
YDR032C	YDL099W	YER096W	YDR163W	YIL024C	YCL001W-B	YDL085C-A	YDR003W-A	YDL219W	YDR350C	YCR005C	YCR020C	YDL109C	YDR165W
YDR035W	YDL100C	YER112W	YDR165W	YIL040W	YCL002C	YDL085W	YDR004W	YDL227C	YDR362C	YCR009C	YCR020C-A	YDL110C	YDR169C-A
YDR036C	YDL101C	YER122C	YDR169C-A	YIL044C	YCL004W	YDL089W	YDR022C	YDL235C	YDR364C	YCR012W	YCR021C	YDL113C	YDR171W
YDR041W	YDL102W	YER124C	YDR171W	YIL046W-A	YCL010C	YDL090C	YDR023W	YDL243C	YDR367W	YCR016W	YCR027C	YDL114W	YDR172W
YDR044W	YDL105W	YER128W	YDR172W	YIL051C	YCL016C	YDL092W	YDR035W	YDR003W	YDR373W	YCR019W	YCR035C	YDL115C	YDR177W
YDR047W	YDL107W	YER142C	YDR174W	YIL055C	YCL017C	YDL097C	YDR036C	YDR014W	YDR387C	YCR020C	YCR036W	YDL120W	YDR178W
YDR049W	YDL109C	YER150W	YDR177W	YIL057C	YCL025C	YDL098C	YDR037W	YDR021W	YDR394W	YCR020C-A	YCR043C	YDL122W	YDR181C
YDR055W	YDL115C	YER157W	YDR178W	YIL077C	YCL026C-B	YDL102W	YDR041W	YDR035W	YDR404C	YCR021C	YCR044C	YDL124W	YDR183W
YDR059C	YDL116W	YER171W	YDR179C	YIL083C	YCL030C	YDL105W	YDR042C	YDR036C	YDR408C	YCR024C	YCR045C	YDL127W	YDR186C
YDR062W	YDL117W	YER173W	YDR181C	YIL087C	YCL031C	YDL113C	YDR044W	YDR044W	YDR410C	YCR027C	YCR046C	YDL129W	YDR194W-A
YDR063W	YDL120W	YER180C	YDR183W	YIL089W	YCL035C	YDL114W	YDR047W	YDR045C	YDR428C	YCR028C	YCR047C	YDL139C	YDR197W
YDR072C	YDL122W	YER180C-A	YDR191W	YIL099W	YCL038C	YDL115C	YDR055W	YDR051C	YDR437W	YCR035C	YCR053W	YDL141W	YDR200C
YDR073W	YDL123W	YER182W	YDR194W-A	YIL108W	YCL047C	YDL116W	YDR057W	YDR056C	YDR451C	YCR036W	YCR054C	YDL144C	YDR213W
YDR076W	YDL128W	YER183C	YDR202C	YIL111W	YCL051W	YDL121C	YDR062W	YDR057W	YDR460W	YCR037C	YCR059C	YDL148C	YDR214W
YDR085C	YDL134C	YER185W	YDR205W	YIL124W	YCL052C	YDL123W	YDR063W	YDR058C	YDR465C	YCR043C	YCR060W	YDL150W	YDR218C
YDR092W	YDL138W	YFL002C	YDR208W	YIL134W	YCL055W	YDL127W	YDR064W	YDR067C	YDR473C	YCR044C	YCR061W	YDL156W	YDR222W
YDR098C	YDL141W	YFL009W	YDR222W	YIL152W	YCL056C	YDL130W-A	YDR070C	YDR068W	YDR476C	YCR045C	YCR063W	YDL159W	YDR223W
YDR099W	YDL144C	YFL017C	YDR223W	YIL157C	YCL057C-A	YDL141W	YDR073W	YDR069C	YDR478W	YCR046C	YCR065W	YDL159W-A	YDR225W
YDR100W	YDL150W	YFL018C	YDR225W	YIR001C	YCL061C	YDL144C	YDR083W	YDR073W	YDR482C	YCR047C	YCR067C	YDL160C	YDR229W
YDR101C	YDL156W	YFL027C	YDR229W	YIR003W	YCL063W	YDL150W	YDR085C	YDR079W	YDR489W	YCR048W	YCR069W	YDL165W	YDR237W
YDR108W	YDL164C	YFL029C	YDR234W	YIR005W	YCR002C	YDL156W	YDR091C	YDR080W	YDR490C	YCR054C	YCR071C	YDL166C	YDR238C
YDR109C	YDL166C	YFL041W-A	YDR237W	YIR013C	YCR003W	YDL160C	YDR092W	YDR081C	YDR498C	YCR061W	YCR073W-A	YDL168W	YDR242W
YDR110W	YDL167C	YFL045C	YDR240C	YIR015W	YCR005C	YDL160C-A	YDR098C	YDR082W	YDR506C	YCR063W	YCR083W	YDL170W	YDR243C
YDR113C	YDL168W	YFL052W	YDR242W	YIR025W	YCR009C	YDL165W	YDR100W	YDR083W	YDR515W	YCR067C	YCR090C	YDL173W	YDR245W
YDR115W	YDL173W	YFL060C	YDR244W	YIR030C	YCR016W	YDL167C	YDR109C	YDR090C	YDR518W	YCR069W	YCR091W	YDL174C	YDR246W
YDR125C	YDL174C	YFR003C	YDR245W	YJL003W	YCR019W	YDL168W	YDR110W	YDR107C	YDR529C	YCR071C	YCR094W	YDL175C	YDR246W-A
YDR138W	YDL175C	YFR022W	YDR246W	YJL004C	YCR020C	YDL170W	YDR113C	YDR110W	YDR531W	YCR073W-A	YCR095W-A	YDL176W	YDR255C
YDR142C	YDL178W	YFR023W	YDR249C	YJL019W	YCR020C-A	YDL174C	YDR115W	YDR118W	YDR532C	YCR076C	YCR099C	YDL177C	YDR259C
YDR143C	YDL179W	YFR025C	YDR252W	YJL031C	YCR024C	YDL175C	YDR116C	YDR141C	YDR538W	YCR077C	YCR101C	YDL178W	YDR262W
YDR145W	YDL180W	YFR031C	YDR253C	YJL038C	YCR027C	YDL179W	YDR118W	YDR143C	YDR541C	YCR079W	YCR107W	YDL180W	YDR268W
YDR148C	YDL181W	YFR037C	YDR255C	YJL046W	YCR035C	YDL180W	YDR120C	YDR145W	YEL001C	YCR083W	YDL001W	YDL193W	YDR286C
YDR156W	YDL190C	YFR039C	YDR259C	YJL059W	YCR036W	YDL181W	YDR137W	YDR147W	YEL004W	YCR087C-A	YDL003W	YDL199C	YDR288W
YDR158W	YDL191W	YFR042W	YDR261C	YJL066C	YCR043C	YDL183C	YDR138W	YDR151C	YEL006W	YCR090C	YDL005C	YDL201W	YDR296W
YDR163W	YDL199C	YFR050C	YDR268W	YJL073W	YCR045C	YDL188C	YDR143C	YDR152W	YEL012W	YCR091W	YDL006W	YDL202W	YDR309C
YDR164C	YDL201W	YFR055W	YDR283C	YJL077C	YCR046C	YDL191W	YDR144C	YDR156W	YEL016C	YCR094W	YDL007W	YDL203C	YDR315C
YDR169C-A	YDL209C	YGL004C	YDR286C	YJL102W	YCR047C	YDL194W	YDR146C	YDR158W	YEL019C	YCR095C	YDL008W	YDL204W	YDR315C-1
YDR174W	YDL212W	YGL010W	YDR288W	YJL121C	YCR048W	YDL199C	YDR147W	YDR163W	YEL029C	YCR095W-A	YDL012C	YDL205C	YDR317W
YDR176W	YDL214C	YGL011C	YDR294C	YJL122W	YCR053W	YDL201W	YDR148C	YDR164C	YEL037C	YCR099C	YDL017W	YDL209C	YDR323C
YDR177W	YDL218W	YGL019W	YDR301W	YJL126W	YCR054C	YDL209C	YDR151C	YDR165W	YEL041W	YCR101C	YDL020C	YDL211C	YDR324C
YDR179C	YDL220C	YGL021W	YDR304C	YJL141C	YCR059C	YDL211C	YDR152W	YDR169C-A	YEL046C	YCR105W	YDL022W	YDL212W	YDR347W
YDR179W-A	YDL222C	YGL029W	YDR305C	YJL145W	YCR060W	YDL212W	YDR158W	YDR171W	YEL050C	YCR107W	YDL024C	YDL213C	YDR350C
YDR182W	YDL224C	YGL038C	YDR309C	YJL147C	YCR061W	YDL213C	YDR164C	YDR172W	YEL052W	YDL004W	YDL025C	YDL217C	YDR352W
YDR184C	YDL237W	YGL043W	YDR311W	YJL168C	YCR063W	YDL214C	YDR165W	YDR174W	YEL059C-A	YDL005C	YDL028C	YDL218W	YDR363W-A
YDR191W	YDL240W	YGL045W	YDR314C	YJL185C	YCR065W	YDL217C	YDR171W	YDR177W	YEL066W	YDL006W	YDL029W	YDL219W	YDR367W
YDR197W	YDL243C	YGL059W	YDR315C-1	YJL186W	YCR067C	YDL218W	YDR172W	YDR178W	YER003C	YDL012C	YDL030W	YDL227C	YDR368W
YDR201W	YDR001C	YGL060W	YDR315C-2	YJL193W	YCR069W	YDL219W	YDR174W	YDR179C	YER007W	YDL013W	YDL031W	YDL230W	YDR375C
YDR202C	YDR004W	YGL063W	YDR316W	YJL196C	YCR071C	YDL224C	YDR179C	YDR179W-A	YER016W	YDL017W	YDL033C	YDL235C	YDR376W
YDR213W	YDR032C	YGL079W	YDR317W	YJL208C	YCR075W-A	YDL230W	YDR179W-A	YDR183W	YER023W	YDL018C	YDL036C	YDL237W	YDR377W
YDR214W	YDR036C	YGL082W	YDR339C	YJL213W	YCR076C	YDL237W	YDR181C	YDR189W	YER033C	YDL022W	YDL037C	YDL243C	YDR378C
YDR218C	YDR037W	YGL083W	YDR346C	YJR003C	YCR077C	YDL243C	YDR183W	YDR194W-A	YER034W	YDL024C	YDL044C	YDR001C	YDR379C-A
YDR219C	YDR044W	YGL087C	YDR347W	YJR015W	YCR079W	YDR003W	YDR186C	YDR195W	YER039C-A	YDL025C	YDL046W	YDR003W-A	YDR381W
YDR222W	YDR045C	YGL096W	YDR350C	YJR022W	YCR087C-A	YDR004W	YDR189W	YDR197W	YER042W	YDL030W	YDL048C	YDR004W	YDR386W
YDR223W	YDR047W	YGL105W	YDR357C	YJR025C	YCR091W	YDR006C	YDR197W	YDR201W	YER050C	YDL031W	YDL052C	YDR013W	YDR387C
YDR225W	YDR049W	YGL107C	YDR367W	YJR034W	YCR094W	YDR020C	YDR218C	YDR202C	YER053C	YDL033C	YDL053C	YDR014W	YDR390C
YDR228C	YDR054C	YGL122C	YDR373W	YJR060W	YCR095C	YDR022C	YDR219C	YDR208W	YER055C	YDL036C	YDL054C	YDR026C	YDR393W
YDR229W	YDR062W	YGL144C	YDR379C-A	YJR086W	YCR095W-A	YDR026C	YDR222W	YDR213W	YER057C	YDL037C	YDL055C	YDR027C	YDR397C
YDR236C	YDR063W	YGL153W	YDR383C	YJR091C	YCR099C	YDR036C	YDR223W	YDR218C	YER060W	YDL044C	YDL056W	YDR032C	YDR399W
YDR240C	YDR069C	YGL163C	YDR386W	YJR096W	YCR101C	YDR037W	YDR225W	YDR223W	YER061C	YDL046W	YDL057W	YDR036C	YDR400W
YDR243C	YDR072C	YGL164C	YDR387C	YJR097W	YCR105W	YDR050C	YDR226W	YDR228C	YER065C	YDL048C	YDL059C	YDR037W	YDR404C
YDR244W	YDR073W	YGL171W	YDR393W	YJR104C	YCR107W	YDR054C	YDR228C	YDR229W	YER067W	YDL053C	YDL060W	YDR041W	YDR421W
YDR245W	YDR074W	YGL179C	YDR397C	YJR109C	YDL001W	YDR055W	YDR229W	YDR237W	YER070W	YDL054C	YDL061C	YDR044W	YDR422C
YDR246W	YDR077W	YGL205W	YDR399W	YJR118C	YDL003W	YDR056C	YDR233C	YDR243C	YER071C	YDL055C	YDL064W	YDR047W	YDR427W
YDR247W	YDR079W	YGL231C	YDR400W	YJR134C	YDL005C	YDR058C	YDR234W	YDR246W	YER076C	YDL056W	YDL065C	YDR051C	YDR434W
YDR252W	YDR080W	YGL240W	YDR404C	YJR150C	YDL006W	YDR059C	YDR236C	YDR246W-A	YER082C	YDL057W	YDL066W	YDR055W	YDR449C
YDR255C	YDR081C	YGL250W	YDR410C	YJR153W	YDL007W	YDR062W	YDR237W	YDR249C	YER083C	YDL059C	YDL070W	YDR056C	YDR451C
YDR261C	YDR085C	YGL262W	YDR419W	YKL007W	YDL008W	YDR063W	YDR240C	YDR252W	YER085C	YDL061C	YDL074C	YDR057W	YDR454C
YDR262W	YDR087C	YGR004W	YDR422C	YKL013C	YDL012C	YDR065W	YDR243C	YDR254W	YER099C	YDL063C	YDL078C	YDR062W	YDR459C
YDR263C	YDR091C	YGR005C	YDR428C	YKL024C	YDL017W	YDR069C	YDR244W	YDR255C	YER106W	YDL064W	YDL082W	YDR065W	YDR460W
YDR265W	YDR092W	YGR020C	YDR437W	YKL026C	YDL018C	YDR070C	YDR245W	YDR256C	YER107C	YDL066W	YDL085C-A	YDR067C	YDR461W
YDR266C	YDR100W	YGR021W	YDR451C	YKL037W	YDL020C	YDR072C	YDR249C	YDR261C	YER111C	YDL067C	YDL089W	YDR069C	YDR480W
YDR272W	YDR101C	YGR029W	YDR454C	YKL055C	YDL024C	YDR078C	YDR252W	YDR265W	YER115C	YDL070W	YDL090C	YDR073W	YDR481C
YDR277C	YDR103W	YGR030C	YDR459C	YKL063C	YDL028C	YDR079C-A	YDR253C	YDR268W	YER127W	YDL072C	YDL092W	YDR076W	YDR484W
YDR292C	YDR107C	YGR035W-A	YDR465C	YKL087C	YDL029W	YDR082W	YDR254W	YDR272W	YER134C	YDL074C	YDL097C	YDR079C-A	YDR485C
YDR295C	YDR118W	YGR063C	YDR476C	YKL091C	YDL030W	YDR083W	YDR255C	YDR280W	YER137C	YDL077C	YDL098C	YDR081C	YDR494W
YDR296W	YDR120C	YGR066C	YDR490C	YKL098W	YDL033C	YDR085C	YDR259C	YDR283C	YER141W	YDL078C	YDL099W	YDR083W	YDR496C
YDR297W	YDR137W	YGR067C	YDR498C	YKL114C	YDL044C	YDR091C	YDR262W	YDR285W	YER150W	YDL080C	YDL100C	YDR090C	YDR506C
YDR305C	YDR138W	YGR075C	YDR510W	YKL137W	YDL046W	YDR098C	YDR265W	YDR286C	YER154W	YDL085C-A	YDL101C	YDR092W	YDR510W
YDR307W	YDR142C	YGR076C	YDR511W	YKL160W	YDL048C	YDR100W	YDR272W	YDR287W	YER163C	YDL085W	YDL102W	YDR100W	YDR512C
YDR311W	YDR144C	YGR088W	YDR513W	YKL172W	YDL051W	YDR101C	YDR277C	YDR288W	YER175C	YDL090C	YDL107W	YDR104C	YDR513W
YDR315C-1	YDR145W	YGR095C	YDR517W	YKL186C	YDL052C	YDR107C	YDR284C	YDR294C	YER180C	YDL092W	YDL109C	YDR107C	YDR518W
YDR315C-2	YDR146C	YGR101W	YDR523C	YKL190W	YDL053C	YDR108W	YDR288W	YDR295C	YER182W	YDL097C	YDL110C	YDR108W	YDR529C
YDR316W	YDR151C	YGR108W	YDR527W	YKL191W	YDL054C	YDR109C	YDR289C	YDR296W	YER183C	YDL098C	YDL114W	YDR110W	YDR536W
YDR323C	YDR158W	YGR109C	YDR529C	YKL192C	YDL055C	YDR110W	YDR292C	YDR297W	YER186C	YDL100C	YDL115C	YDR116C	YDR539W
YDR324C	YDR159W	YGR129W	YDR532C	YKR035W-A	YDL056W	YDR113C	YDR294C	YDR301W	YFL009W	YDL101C	YDL116W	YDR120C	YDR541C
YDR330W	YDR162C	YGR131W	YDR533C	YKR039W	YDL057W	YDR118W	YDR297W	YDR304C	YFL016C	YDL102W	YDL120W	YDR121W	YEL011W
YDR333C	YDR164C	YGR133W	YDR536W	YKR044W	YDL059C	YDR120C	YDR301W	YDR307W	YFL026W	YDL105W	YDL121C	YDR125C	YEL016C
YDR339C	YDR165W	YGR138C	YDR538W	YKR056W	YDL060W	YDR137W	YDR307W	YDR310C	YFL027C	YDL107W	YDL123W	YDR138W	YEL019C
YDR346C	YDR169C-A	YGR150C	YDR541C	YKR060W	YDL061C	YDR138W	YDR309C	YDR311W	YFL028C	YDL109C	YDL124W	YDR143C	YEL026W
YDR350C	YDR171W	YGR154C	YEL004W	YKR076W	YDL063C	YDR142C	YDR314C	YDR315C	YFL029C	YDL110C	YDL127W	YDR145W	YEL037C
YDR352W	YDR174W	YGR158C	YEL019C	YKR087C	YDL064W	YDR143C	YDR315C-1	YDR316W	YFL038C	YDL113C	YDL129W	YDR152W	YEL039C
YDR357C	YDR178W	YGR165W	YEL026W	YKR089C	YDL065C	YDR144C	YDR316W	YDR317W	YFL041W-A	YDL115C	YDL130W	YDR158W	YEL048C
YDR364C	YDR179W-A	YGR168C	YEL029C	YKR091W	YDL066W	YDR145W	YDR317W	YDR323C	YFL042C	YDL116W	YDL130W-A	YDR159W	YEL051W
YDR367W	YDR181C	YGR169C-A	YEL048C	YLL004W	YDL067C	YDR147W	YDR321W	YDR324C	YFL047W	YDL120W	YDL136W	YDR162C	YEL056W
YDR368W	YDR184C	YGR173W	YEL050C	YLL009C	YDL070W	YDR148C	YDR323C	YDR339C	YFL051C	YDL121C	YDL138W	YDR163W	YEL059C-A
YDR371W	YDR189W	YGR174C	YEL051W	YLL013C	YDL074C	YDR151C	YDR330W	YDR346C	YFL054C	YDL122W	YDL139C	YDR164C	YEL062W
YDR372C	YDR194W-A	YGR177C	YEL052W	YLL033W	YDL076C	YDR156W	YDR339C	YDR347W	YFR006W	YDL123W	YDL141W	YDR165W	YEL063C
YDR377W	YDR197W	YGR183C	YEL057C	YLL035W	YDL078C	YDR158W	YDR346C	YDR350C	YFR017C	YDL124W	YDL143W	YDR169C	YEL072W
YDR378C	YDR198C	YGR193C	YEL059C-A	YLL038C	YDL080C	YDR162C	YDR348C	YDR352W	YFR026C	YDL127W	YDL144C	YDR169C-A	YER001W
YDR381W	YDR201W	YGR195W	YEL060C	YLL053C	YDL085C-A	YDR164C	YDR353W	YDR353W	YFR027W	YDL128W	YDL148C	YDR171W	YER006W
YDR384C	YDR205W	YGR196C	YEL063C	YLR001C	YDL085W	YDR169C	YDR371W	YDR356W	YFR037C	YDL130W-A	YDL150W	YDR172W	YER012W
YDR386W	YDR208W	YGR204C-A	YER001W	YLR011W	YDL089W	YDR178W	YDR373W	YDR357C	YFR038W	YDL138W	YDL159W-A	YDR174W	YER013W
YDR387C	YDR213W	YGR207C	YER003C	YLR012C	YDL090C	YDR179W-A	YDR375C	YDR364C	YFR039C	YDL141W	YDL160C	YDR177W	YER014C-A
YDR390C	YDR214W	YGR210C	YER005W	YLR013W	YDL091C	YDR183W	YDR376W	YDR367W	YFR042W	YDL144C	YDL160C-A	YDR178W	YER016W
YDR393W	YDR218C	YGR213C	YER018C	YLR014C	YDL092W	YDR189W	YDR379C-A	YDR368W	YFR046C	YDL148C	YDL164C	YDR179C	YER019W
YDR394W	YDR219C	YGR220C	YER020W	YLR015W	YDL097C	YDR194W-A	YDR381W	YDR371W	YFR047C	YDL150W	YDL165W	YDR182W	YER023W
YDR397C	YDR221W	YGR225W	YER023W	YLR022C	YDL098C	YDR197W	YDR386W	YDR373W	YFR049W	YDL156W	YDL166C	YDR189W	YER032W
YDR402C	YDR225W	YGR236C	YER028C	YLR033W	YDL099W	YDR202C	YDR387C	YDR378C	YFR053C	YDL159W	YDL170W	YDR191W	YER034W
YDR404C	YDR226W	YGR247W	YER032W	YLR036C	YDL100C	YDR205W	YDR389W	YDR386W	YGL010W	YDL159W-A	YDL175C	YDR194W-A	YER042W
YDR410C	YDR228C	YGR249W	YER036C	YLR040C	YDL101C	YDR214W	YDR390C	YDR387C	YGL018C	YDL164C	YDL176W	YDR197W	YER050C
YDR419W	YDR229W	YGR252W	YER039C-A	YLR042C	YDL105W	YDR218C	YDR393W	YDR394W	YGL019W	YDL165W	YDL177C	YDR198C	YER051W
YDR428C	YDR234W	YGR253C	YER050C	YLR056W	YDL109C	YDR219C	YDR394W	YDR397C	YGL025C	YDL166C	YDL178W	YDR201W	YER053C
YDR434W	YDR236C	YGR254W	YER051W	YLR066W	YDL110C	YDR225W	YDR399W	YDR399W	YGL026C	YDL167C	YDL180W	YDR202C	YER054C
YDR436W	YDR237W	YGR267C	YER055C	YLR084C	YDL113C	YDR226W	YDR400W	YDR404C	YGL028C	YDL168W	YDL181W	YDR208W	YER055C
YDR446W	YDR240C	YGR268C	YER058W	YLR093C	YDL114W	YDR228C	YDR402C	YDR408C	YGL029W	YDL170W	YDL186W	YDR213W	YER057C
YDR449C	YDR242W	YGR273C	YER061C	YLR099W-A	YDL115C	YDR229W	YDR408C	YDR410C	YGL040C	YDL173W	YDL189W	YDR218C	YER058W
YDR451C	YDR243C	YGR277C	YER063W	YLR102C	YDL116W	YDR234W	YDR416W	YDR427W	YGL050W	YDL174C	YDL191W	YDR221W	YER061C
YDR459C	YDR244W	YHL011C	YER066W	YLR104W	YDL120W	YDR236C	YDR419W	YDR459C	YGL058W	YDL175C	YDL197C	YDR222W	YER065C
YDR461W	YDR245W	YHL022C	YER076C	YLR113W	YDL121C	YDR237W	YDR427W	YDR460W	YGL064C	YDL176W	YDL200C	YDR223W	YER066W
YDR463W	YDR246W-A	YHL031C	YER078C	YLR117C	YDL122W	YDR240C	YDR428C	YDR461W	YGL065C	YDL177C	YDL203C	YDR226W	YER067W
YDR466W	YDR247W	YHR001W-A	YER080W	YLR135W	YDL123W	YDR242W	YDR447C	YDR465C	YGL075C	YDL179W	YDL204W	YDR228C	YER070W
YDR468C	YDR252W	YHR008C	YER083C	YLR173W	YDL124W	YDR243C	YDR449C	YDR466W	YGL079W	YDL180W	YDL205C	YDR236C	YER071C
YDR473C	YDR256C	YHR012W	YER085C	YLR182W	YDL129W	YDR249C	YDR450W	YDR468C	YGL081W	YDL181W	YDL211C	YDR237W	YER073W
YDR479C	YDR259C	YHR014W	YER086W	YLR190W	YDL134C	YDR251W	YDR451C	YDR473C	YGL082W	YDL183C	YDL212W	YDR238C	YER074W-A
YDR480W	YDR263C	YHR018C	YER087W	YLR195C	YDL138W	YDR252W	YDR454C	YDR478W	YGL087C	YDL186W	YDL213C	YDR242W	YER076C
YDR481C	YDR265W	YHR032W	YER091C	YLR200W	YDL141W	YDR253C	YDR460W	YDR480W	YGL089C	YDL189W	YDL217C	YDR243C	YER077C
YDR484W	YDR266C	YHR034C	YER093C	YLR211C	YDL148C	YDR254W	YDR461W	YDR482C	YGL098W	YDL190C	YDL218W	YDR247W	YER078C
YDR486C	YDR268W	YHR059W	YER096W	YLR224W	YDL150W	YDR255C	YDR465C	YDR485C	YGL101W	YDL193W	YDL219W	YDR249C	YER080W
YDR488C	YDR272W	YHR065C	YER101C	YLR226W	YDL156W	YDR256C	YDR466W	YDR488C	YGL112C	YDL194W	YDL222C	YDR251W	YER082C
YDR489W	YDR277C	YHR070W	YER111C	YLR228C	YDL159W	YDR262W	YDR473C	YDR490C	YGL117W	YDL197C	YDL227C	YDR252W	YER083C
YDR490C	YDR284C	YHR072W-A	YER112W	YLR242C	YDL160C	YDR265W	YDR479C	YDR494W	YGL119W	YDL199C	YDL230W	YDR253C	YER085C
YDR496C	YDR285W	YHR075C	YER115C	YLR251W	YDL160C-A	YDR266C	YDR481C	YDR496C	YGL121C	YDL200C	YDL237W	YDR255C	YER087W
YDR498C	YDR287W	YHR090C	YER128W	YLR253W	YDL164C	YDR268W	YDR486C	YDR498C	YGL127C	YDL201W	YDL243C	YDR256C	YER089C
YDR502C	YDR288W	YHR100C	YER134C	YLR262C-A	YDL165W	YDR272W	YDR489W	YDR499W	YGL133W	YDL202W	YDR003W	YDR259C	YER093C
YDR506C	YDR289C	YHR101C	YER141W	YLR266C	YDL166C	YDR280W	YDR490C	YDR502C	YGL138C	YDL203C	YDR003W-A	YDR261C	YER094C
YDR510W	YDR292C	YHR122W	YER142C	YLR268W	YDL167C	YDR285W	YDR494W	YDR510W	YGL144C	YDL204W	YDR004W	YDR262W	YER098W
YDR514C	YDR294C	YHR132C	YER143W	YLR284C	YDL168W	YDR287W	YDR498C	YDR513W	YGL145W	YDL205C	YDR006C	YDR265W	YER101C
YDR515W	YDR295C	YHR135C	YER148W	YLR287C	YDL170W	YDR288W	YDR502C	YDR515W	YGL145W-1	YDL209C	YDR021W	YDR266C	YER109C
YDR516C	YDR299W	YHR139C	YER151C	YLR297W	YDL173W	YDR292C	YDR512C	YDR517W	YGL146C	YDL212W	YDR023W	YDR268W	YER111C
YDR517W	YDR304C	YHR148W	YER157W	YLR298C	YDL174C	YDR294C	YDR514C	YDR519W	YGL158W	YDL214C	YDR026C	YDR277C	YER112W
YDR518W	YDR306C	YHR153C	YER161C	YLR300W	YDL175C	YDR295C	YDR515W	YDR522C	YGL159W	YDL217C	YDR027C	YDR280W	YER128W
YDR519W	YDR307W	YHR157W	YER168C	YLR307W	YDL176W	YDR296W	YDR516C	YDR529C	YGL168W	YDL219W	YDR032C	YDR285W	YER129W
YDR522C	YDR308C	YHR159W	YER174C	YLR309C	YDL177C	YDR297W	YDR522C	YDR532C	YGL169W	YDL220C	YDR035W	YDR287W	YER140W
YDR523C	YDR311W	YHR167W	YER175W-A	YLR315W	YDL178W	YDR301W	YDR528W	YDR533C	YGL171W	YDL222C	YDR036C	YDR289C	YER143W
YDR527W	YDR315C	YHR176W	YER185W	YLR318W	YDL179W	YDR307W	YDR529C	YDR536W	YGL175C	YDL224C	YDR037W	YDR292C	YER148W
YDR532C	YDR315C-1	YHR177W	YFL005W	YLR321C	YDL180W	YDR308C	YDR536W	YDR539W	YGL179C	YDL230W	YDR041W	YDR294C	YER154W
YDR536W	YDR315C-2	YHR182W	YFL016C	YLR345W	YDL181W	YDR315C	YDR539W	YDR541C	YGL202W	YDL235C	YDR042C	YDR295C	YER158C
YDR538W	YDR316W	YHR189W	YFL027C	YLR346C	YDL183C	YDR315C-1	YEL001C	YEL001C	YGL231C	YDL237W	YDR044W	YDR296W	YER161C
YEL001C	YDR317W	YHR198C	YFL028C	YLR360W	YDL189W	YDR315C-2	YEL004W	YEL003W	YGL235W	YDL241W	YDR045C	YDR297W	YER163C
YEL009C	YDR320C	YHR199C	YFL030W	YLR361C-A	YDL190C	YDR317W	YEL012W	YEL004W	YGL237C	YDL243C	YDR047W	YDR301W	YER168C
YEL011W	YDR321W	YHR209W	YFL041W-A	YLR364W	YDL191W	YDR319C	YEL026W	YEL006W	YGL249W	YDR001C	YDR049W	YDR304C	YER174C
YEL016C	YDR322W	YHR210C	YFL052W	YLR375W	YDL193W	YDR320C	YEL029C	YEL009C	YGL250W	YDR003W	YDR055W	YDR307W	YER175C
YEL026W	YDR323C	YIL008W	YFR003C	YLR404W	YDL194W	YDR321W	YEL037C	YEL011W	YGL252C	YDR003W-A	YDR058C	YDR308C	YER175W-A
YEL029C	YDR324C	YIL009C-A	YFR006W	YLR408C	YDL197C	YDR323C	YEL039C	YEL016C	YGL254W	YDR004W	YDR065W	YDR311W	YER185W
YEL037C	YDR328C	YIL010W	YFR009W	YLR412C-A	YDL199C	YDR328C	YEL040W	YEL018W	YGL259W	YDR006C	YDR066C	YDR315C	YER186C
YEL039C	YDR330W	YIL024C	YFR011C	YLR415C	YDL200C	YDR330W	YEL041W	YEL019C	YGL261C	YDR013W	YDR068W	YDR316W	YFL002C
YEL040W	YDR333C	YIL029C	YFR015C	YLR423C	YDL201W	YDR347W	YEL046C	YEL029C	YGL262W	YDR014W	YDR069C	YDR317W	YFL010C
YEL042W	YDR339C	YIL035C	YFR016C	YLR438W	YDL202W	YDR350C	YEL050C	YEL039C	YGL263W	YDR021W	YDR070C	YDR319C	YFL016C
YEL050C	YDR346C	YIL049W	YFR017C	YLR457C	YDL203C	YDR352W	YEL051W	YEL046C	YGR008C	YDR023W	YDR072C	YDR320C	YFL018C
YEL051W	YDR347W	YIL061C	YFR022W	YLR461W	YDL204W	YDR353W	YEL056W	YEL048C	YGR020C	YDR026C	YDR074W	YDR323C	YFL026W
YEL052W	YDR348C	YIL067C	YFR025C	YML014W	YDL205C	YDR357C	YEL057C	YEL050C	YGR035C	YDR027C	YDR076W	YDR325W	YFL030W
YEL056W	YDR350C	YIL072W	YFR026C	YML017W	YDL209C	YDR362C	YEL058W	YEL051W	YGR036C	YDR028C	YDR077W	YDR339C	YFL041W-A
YEL057C	YDR352W	YIL073C	YFR027W	YML020W	YDL211C	YDR363W-A	YEL062W	YEL052W	YGR037C	YDR033W	YDR079W	YDR346C	YFL042C
YEL058W	YDR353W	YIL077C	YFR031C	YML023C	YDL212W	YDR364C	YEL063C	YEL057C	YGR038W	YDR035W	YDR081C	YDR347W	YFL045C
YEL060C	YDR354W	YIL084C	YFR037C	YML027W	YDL213C	YDR367W	YER001W	YEL058W	YGR040W	YDR036C	YDR083W	YDR348C	YFL047W
YEL062W	YDR357C	YIL096C	YFR039C	YML038C	YDL214C	YDR368W	YER003C	YEL062W	YGR042W	YDR041W	YDR085C	YDR350C	YFL052W
YEL063C	YDR362C	YIL098C	YFR040W	YML042W	YDL217C	YDR369C	YER005W	YEL063C	YGR045C	YDR042C	YDR087C	YDR352W	YFL060C
YER005W	YDR363W-A	YIL099W	YFR043C	YML078W	YDL218W	YDR372C	YER006W	YEL066W	YGR048W	YDR044W	YDR090C	YDR353W	YFR003C
YER006W	YDR368W	YIL103W	YFR044C	YML087C	YDL220C	YDR376W	YER007W	YEL072W	YGR053C	YDR045C	YDR091C	YDR354W	YFR006W
YER007W	YDR369C	YIL113W	YFR046C	YML115C	YDL222C	YDR378C	YER016W	YER006W	YGR057C	YDR049W	YDR092W	YDR357C	YFR010W
YER010C	YDR373W	YIL122W	YFR053C	YML125C	YDL224C	YDR381W	YER019W	YER007W	YGR063C	YDR051C	YDR098C	YDR363W-A	YFR015C
YER011W	YDR375C	YIL123W	YFR055W	YMR016C	YDL227C	YDR384C	YER020W	YER011W	YGR066C	YDR055W	YDR100W	YDR364C	YFR017C
YER012W	YDR376W	YIL124W	YGL009C	YMR018W	YDL230W	YDR386W	YER021W	YER020W	YGR074W	YDR056C	YDR101C	YDR367W	YFR022W
YER014C-A	YDR379C-A	YIL127C	YGL015C	YMR020W	YDL235C	YDR387C	YER023W	YER034W	YGR076C	YDR059C	YDR107C	YDR368W	YFR025C
YER016W	YDR381W	YIL132C	YGL017W	YMR036C	YDL237W	YDR389W	YER026C	YER036C	YGR078C	YDR063W	YDR108W	YDR369C	YFR027W
YER018C	YDR387C	YIL144W	YGL018C	YMR056C	YDL243C	YDR393W	YER028C	YER042W	YGR080W	YDR065W	YDR109C	YDR371W	YFR032C
YER019W	YDR390C	YIL145C	YGL019W	YMR079W	YDR001C	YDR394W	YER034W	YER050C	YGR105W	YDR067C	YDR110W	YDR373W	YFR038W
YER020W	YDR394W	YIL153W	YGL028C	YMR090W	YDR003W	YDR397C	YER036C	YER051W	YGR113W	YDR068W	YDR113C	YDR375C	YFR042W
YER023W	YDR400W	YIL154C	YGL037C	YMR099C	YDR003W-A	YDR399W	YER039C-A	YER053C	YGR127W	YDR069C	YDR115W	YDR376W	YFR044C
YER024W	YDR402C	YIR001C	YGL041C-B	YMR101C	YDR004W	YDR400W	YER042W	YER054C	YGR129W	YDR070C	YDR116C	YDR377W	YFR045W
YER036C	YDR408C	YIR005W	YGL043W	YMR105W-A	YDR020C	YDR402C	YER046W	YER055C	YGR130C	YDR073W	YDR118W	YDR378C	YFR047C
YER039C-A	YDR409W	YIR021W	YGL048C	YMR130W	YDR021W	YDR404C	YER053C-A	YER057C	YGR132C	YDR074W	YDR120C	YDR379C-A	YFR049W
YER042W	YDR410C	YIR027C	YGL054C	YMR133W	YDR022C	YDR408C	YER055C	YER060W	YGR133W	YDR076W	YDR121W	YDR381W	YFR050C
YER046W	YDR421W	YIR030C	YGL061C	YMR135C	YDR023W	YDR410C	YER056C-A	YER066W	YGR135W	YDR077W	YDR122W	YDR386W	YFR053C
YER048W-A	YDR422C	YIR035C	YGL063W	YMR140W	YDR027C	YDR419W	YER060W	YER067W	YGR143W	YDR080W	YDR125C	YDR394W	YFR055W
YER051W	YDR427W	YIR036C	YGL065C	YMR171C	YDR032C	YDR422C	YER061C	YER070W	YGR145W	YDR081C	YDR137W	YDR397C	YGL004C
YER053C	YDR428C	YIR038C	YGL067W	YMR172W	YDR036C	YDR427W	YER063W	YER071C	YGR146C-A	YDR082W	YDR138W	YDR399W	YGL010W
YER053C-A	YDR434W	YIR039C	YGL071W	YMR175W	YDR037W	YDR428C	YER065C	YER073W	YGR153W	YDR083W	YDR142C	YDR402C	YGL011C
YER054C	YDR446W	YIR042C	YGL081W	YMR181C	YDR041W	YDR437W	YER066W	YER076C	YGR155W	YDR085C	YDR143C	YDR408C	YGL017W
YER056C-A	YDR449C	YJL011C	YGL090W	YMR182W-A	YDR042C	YDR446W	YER067W	YER078C	YGR158C	YDR087C	YDR144C	YDR416W	YGL018C
YER061C	YDR451C	YJL023C	YGL091C	YMR187C	YDR044W	YDR447C	YER068W	YER080W	YGR165W	YDR090C	YDR148C	YDR421W	YGL019W
YER063W	YDR454C	YJL024C	YGL096W	YMR197C	YDR045C	YDR449C	YER073W	YER082C	YGR169C	YDR091C	YDR151C	YDR422C	YGL021W
YER066W	YDR461W	YJL027C	YGL099W	YMR217W	YDR049W	YDR450W	YER076C	YER085C	YGR173W	YDR092W	YDR152W	YDR427W	YGL026C
YER067W	YDR463W	YJL037W	YGL100W	YMR240C	YDR050C	YDR451C	YER077C	YER087W	YGR174C	YDR100W	YDR156W	YDR428C	YGL029W
YER071C	YDR465C	YJL043W	YGL105W	YMR244C-A	YDR051C	YDR454C	YER078C	YER091C	YGR174W-A	YDR101C	YDR162C	YDR434W	YGL037C
YER073W	YDR476C	YJL049W	YGL108C	YMR260C	YDR055W	YDR459C	YER080W	YER094C	YGR178C	YDR103W	YDR163W	YDR437W	YGL039W
YER074W-A	YDR478W	YJL055W	YGL110C	YMR267W	YDR056C	YDR460W	YER081W	YER096W	YGR180C	YDR107C	YDR164C	YDR446W	YGL047W
YER076C	YDR482C	YJL059W	YGL112C	YMR268C	YDR057W	YDR461W	YER082C	YER098W	YGR181W	YDR108W	YDR169C	YDR451C	YGL049C
YER077C	YDR484W	YJL062W-A	YGL119W	YMR269W	YDR058C	YDR465C	YER085C	YER101C	YGR183C	YDR110W	YDR172W	YDR454C	YGL053W
YER078C	YDR485C	YJL063C	YGL121C	YMR270C	YDR059C	YDR466W	YER086W	YER106W	YGR194C	YDR115W	YDR174W	YDR459C	YGL058W
YER080W	YDR486C	YJL065C	YGL122C	YMR272W-B	YDR062W	YDR468C	YER098W	YER109C	YGR201C	YDR116C	YDR176W	YDR461W	YGL061C
YER081W	YDR488C	YJL071W	YGL127C	YMR273C	YDR063W	YDR473C	YER101C	YER112W	YGR202C	YDR118W	YDR177W	YDR465C	YGL064C
YER082C	YDR489W	YJL087C	YGL133W	YMR274C	YDR064W	YDR478W	YER107C	YER115C	YGR204C-A	YDR120C	YDR178W	YDR466W	YGL070C
YER083C	YDR496C	YJL103C	YGL139W	YMR286W	YDR065W	YDR480W	YER116C	YER127W	YGR205W	YDR121W	YDR179C	YDR476C	YGL077C
YER085C	YDR498C	YJL106W	YGL143C	YMR297W	YDR067C	YDR481C	YER117W	YER129W	YGR206W	YDR122W	YDR179W-A	YDR478W	YGL081W
YER086W	YDR499W	YJL127C	YGL155W	YMR313C	YDR068W	YDR482C	YER122C	YER134C	YGR207C	YDR137W	YDR181C	YDR480W	YGL082W
YER098W	YDR500C	YJL143W	YGL156W	YMR314W	YDR072C	YDR486C	YER127W	YER140W	YGR208W	YDR138W	YDR182W	YDR482C	YGL086W
YER099C	YDR502C	YJL144W	YGL158W	YNL012W	YDR073W	YDR488C	YER130C	YER143W	YGR209C	YDR141C	YDR183W	YDR485C	YGL087C
YER101C	YDR506C	YJL156C	YGL164C	YNL032W	YDR076W	YDR489W	YER131W	YER150W	YGR212W	YDR142C	YDR184C	YDR488C	YGL091C
YER107C	YDR510W	YJL160C	YGL169W	YNL044W	YDR078C	YDR490C	YER140W	YER156C	YGR215W	YDR144C	YDR189W	YDR489W	YGL093W
YER109C	YDR511W	YJL168C	YGL179C	YNL102W	YDR079C-A	YDR494W	YER141W	YER157W	YGR220C	YDR146C	YDR191W	YDR490C	YGL095C
YER115C	YDR513W	YJL173C	YGL185C	YNL122C	YDR079W	YDR498C	YER143W	YER159C	YGR225W	YDR147W	YDR194C	YDR494W	YGL098W
YER116C	YDR516C	YJL194W	YGL191W	YNL128W	YDR081C	YDR499W	YER150W	YER163C	YGR226C	YDR148C	YDR194W-A	YDR495C	YGL099W
YER122C	YDR518W	YJL210W	YGL192W	YNL145W	YDR082W	YDR500C	YER159C	YER171W	YGR227W	YDR151C	YDR197W	YDR496C	YGL101W
YER123W	YDR519W	YJL217W	YGL194C	YNL146W	YDR083W	YDR503C	YER165W	YER173W	YGR230W	YDR152W	YDR198C	YDR499W	YGL108C
YER124C	YDR522C	YJR003C	YGL196W	YNL155W	YDR085C	YDR510W	YER171W	YER175C	YGR232W	YDR156W	YDR200C	YDR503C	YGL112C
YER130C	YDR527W	YJR005W	YGL201C	YNL173C	YDR087C	YDR511W	YER173W	YER179W	YGR233C	YDR158W	YDR201W	YDR506C	YGL117W
YER134C	YDR528W	YJR009C	YGL205W	YNL181W	YDR090C	YDR514C	YER174C	YER180C-A	YGR247W	YDR162C	YDR202C	YDR510W	YGL119W
YER137C	YDR529C	YJR034W	YGL208W	YNL190W	YDR091C	YDR515W	YER179W	YER182W	YGR255C	YDR163W	YDR208W	YDR511W	YGL121C
YER140W	YDR530C	YJR039W	YGL209W	YNL195C	YDR092W	YDR516C	YER180C	YER183C	YGR271C-A	YDR164C	YDR213W	YDR512C	YGL134W
YER142C	YDR533C	YJR050W	YGL212W	YNL196C	YDR099W	YDR517W	YER180C-A	YER185W	YGR277C	YDR169C	YDR214W	YDR513W	YGL138C
YER143W	YDR536W	YJR058C	YGL228W	YNL204C	YDR100W	YDR519W	YER185W	YER186C	YHL003C	YDR169C-A	YDR218C	YDR516C	YGL139W
YER148W	YDR539W	YJR060W	YGL235W	YNL211C	YDR101C	YDR520C	YFL001W	YFL002C	YHL004W	YDR171W	YDR219C	YDR517W	YGL140C
YER159C	YDR541C	YJR061W	YGL237C	YNL220W	YDR107C	YDR522C	YFL002C	YFL005W	YHL019C	YDR172W	YDR221W	YDR519W	YGL145W-1
YER174C	YEL001C	YJR073C	YGL242C	YNL225C	YDR108W	YDR523C	YFL010C	YFL012W	YHL022C	YDR174W	YDR222W	YDR520C	YGL156W
YER179W	YEL004W	YJR078W	YGL246C	YNL236W	YDR109C	YDR528W	YFL012W	YFL013C	YHL031C	YDR177W	YDR223W	YDR522C	YGL159W
YER182W	YEL006W	YJR080C	YGL248W	YNL238W	YDR110W	YDR530C	YFL013C	YFL018C	YHL039W	YDR178W	YDR225W	YDR527W	YGL161C
YER186C	YEL011W	YJR082C	YGL254W	YNL244C	YDR113C	YDR531W	YFL016C	YFL026W	YHL042W	YDR179C	YDR226W	YDR531W	YGL164C
YFL002C	YEL012W	YJR083C	YGL259W	YNL245C	YDR116C	YDR532C	YFL017C	YFL028C	YHR008C	YDR179W-A	YDR228C	YDR532C	YGL167C
YFL010C	YEL016C	YJR094C	YGL261C	YNL253W	YDR121W	YDR539W	YFL021W	YFL029C	YHR013C	YDR181C	YDR229W	YDR533C	YGL169W
YFL012W	YEL018W	YJR096W	YGR003W	YNL254C	YDR122W	YDR541C	YFL022C	YFL030W	YHR014W	YDR182W	YDR234W	YDR539W	YGL170C
YFL017C	YEL019C	YJR133W	YGR004W	YNL261W	YDR137W	YEL001C	YFL026W	YFL041W-A	YHR022C	YDR183W	YDR236C	YDR541C	YGL174W
YFL022C	YEL026W	YJR141W	YGR007W	YNL263C	YDR138W	YEL003W	YFL028C	YFL042C	YHR022C-A	YDR189W	YDR237W	YEL001C	YGL175C
YFL029C	YEL039C	YJR142W	YGR008C	YNL269W	YDR141C	YEL006W	YFL030W	YFL045C	YHR034C	YDR191W	YDR238C	YEL003W	YGL176C
YFL030W	YEL041W	YJR152W	YGR013W	YNL284C	YDR142C	YEL009C	YFL034C-A	YFL049W	YHR039C	YDR194C	YDR243C	YEL004W	YGL179C
YFL034C-A	YEL042W	YKL002W	YGR016W	YNL288W	YDR143C	YEL011W	YFL042C	YFL060C	YHR046C	YDR194W-A	YDR244W	YEL012W	YGL185C
YFL041W-A	YEL046C	YKL003C	YGR020C	YNL289W	YDR144C	YEL016C	YFL047W	YFR003C	YHR048W	YDR197W	YDR245W	YEL016C	YGL194C
YFL042C	YEL050C	YKL007W	YGR035C	YNL293W	YDR145W	YEL019C	YFL049W	YFR010W	YHR058C	YDR198C	YDR246W-A	YEL018W	YGL202W
YFL047W	YEL056W	YKL016C	YGR036C	YNL304W	YDR146C	YEL023C	YFL054C	YFR011C	YHR059W	YDR200C	YDR247W	YEL019C	YGL205W
YFL052W	YEL057C	YKL021C	YGR038W	YNL307C	YDR147W	YEL026W	YFL060C	YFR013W	YHR061C	YDR201W	YDR251W	YEL029C	YGL209W
YFL060C	YEL058W	YKL023W	YGR040W	YNL309W	YDR148C	YEL029C	YFR003C	YFR015C	YHR071W	YDR202C	YDR252W	YEL037C	YGL210W
YFR001W	YEL062W	YKL025C	YGR042W	YNL314W	YDR151C	YEL039C	YFR010W	YFR016C	YHR072W-A	YDR205W	YDR254W	YEL042W	YGL226W
YFR003C	YEL064C	YKL027W	YGR045C	YNL325C	YDR152W	YEL040W	YFR011C	YFR022W	YHR074W	YDR208W	YDR255C	YEL046C	YGL228W
YFR011C	YEL072W	YKL037W	YGR066C	YNL326C	YDR156W	YEL046C	YFR017C	YFR023W	YHR083W	YDR213W	YDR256C	YEL048C	YGL231C
YFR013W	YER001W	YKL040C	YGR067C	YNL328C	YDR158W	YEL048C	YFR022W	YFR027W	YHR086W-A	YDR214W	YDR259C	YEL051W	YGL235W
YFR022W	YER003C	YKL043W	YGR072W	YNL334C	YDR159W	YEL057C	YFR032C	YFR030W	YHR092C	YDR218C	YDR261C	YEL056W	YGL242C
YFR025C	YER005W	YKL049C	YGR076C	YNL336W	YDR162C	YEL060C	YFR035C	YFR031C	YHR097C	YDR221W	YDR262W	YEL057C	YGL245W
YFR027W	YER006W	YKL061W	YGR084C	YNR004W	YDR163W	YEL062W	YFR037C	YFR032C	YHR107C	YDR222W	YDR263C	YEL058W	YGL246C
YFR032C-B	YER007W	YKL062W	YGR086C	YNR032C-A	YDR164C	YEL064C	YFR039C	YFR032C-B	YHR110W	YDR223W	YDR266C	YEL059C-A	YGL253W
YFR034C	YER007W-1	YKL067W	YGR089W	YNR040W	YDR165W	YEL066W	YFR042W	YFR035C	YHR111W	YDR225W	YDR268W	YEL060C	YGL257C
YFR035C	YER012W	YKL072W	YGR097W	YNR057C	YDR169C	YER003C	YFR044C	YFR036W	YHR127W	YDR226W	YDR284C	YEL062W	YGL258W
YFR036W	YER014C-A	YKL074C	YGR101W	YNR059W	YDR169C-A	YER006W	YFR045W	YFR037C	YHR129C	YDR229W	YDR286C	YEL066W	YGL259W
YFR039C	YER016W	YKL075C	YGR102C	YNR060W	YDR171W	YER007C-A	YFR046C	YFR039C	YHR132W-A	YDR234W	YDR287W	YER005W	YGL261C
YFR043C	YER021W	YKL080W	YGR104C	YNR064C	YDR172W	YER007W	YFR051C	YFR043C	YHR133C	YDR236C	YDR289C	YER007W	YGR003W
YFR044C	YER028C	YKL088W	YGR109C	YNR066C	YDR174W	YER009W	YFR055W	YFR044C	YHR136C	YDR237W	YDR292C	YER007W-1	YGR007W
YFR045W	YER034W	YKL089W	YGR129W	YNR074C	YDR176W	YER012W	YGL004C	YFR047C	YHR139C	YDR238C	YDR294C	YER010C	YGR016W
YFR046C	YER042W	YKL104C	YGR130C	YOL009C	YDR177W	YER016W	YGL005C	YFR049W	YHR143W	YDR240C	YDR295C	YER013W	YGR017W
YFR047C	YER046W	YKL113C	YGR131W	YOL014W	YDR178W	YER018C	YGL006W-A	YFR050C	YHR150W	YDR242W	YDR297W	YER014C-A	YGR020C
YFR048W	YER050C	YKL117W	YGR133W	YOL018C	YDR179C	YER021W	YGL012W	YFR053C	YHR151C	YDR243C	YDR299W	YER016W	YGR021W
YFR049W	YER051W	YKL120W	YGR140W	YOL021C	YDR179W-A	YER028C	YGL017W	YFR055W	YHR153C	YDR244W	YDR301W	YER018C	YGR029W
YFR050C	YER053C-A	YKL148C	YGR143W	YOL023W	YDR181C	YER032W	YGL019W	YGL006W	YHR154W	YDR245W	YDR304C	YER019W	YGR036C
YFR053C	YER055C	YKL149C	YGR146C	YOL038W	YDR182W	YER034W	YGL021W	YGL006W-A	YHR156C	YDR246W	YDR305C	YER020W	YGR037C
YFR055W	YER056C-A	YKL154W	YGR146C-A	YOL044W	YDR183W	YER036C	YGL026C	YGL009C	YHR157W	YDR246W-A	YDR306C	YER023W	YGR038W
YGL004C	YER060W	YKL162C	YGR148C	YOL047C	YDR184C	YER039C-A	YGL028C	YGL011C	YHR163W	YDR249C	YDR307W	YER024W	YGR041W
YGL011C	YER063W	YKL172W	YGR153W	YOL053W	YDR189W	YER042W	YGL029W	YGL014W	YHR172W	YDR251W	YDR310C	YER033C	YGR042W
YGL015C	YER066W	YKL208W	YGR154C	YOL077W-A	YDR191W	YER050C	YGL031C	YGL017W	YHR176W	YDR252W	YDR311W	YER039C-A	YGR065C
YGL017W	YER070W	YKR005C	YGR155W	YOL091W	YDR194W-A	YER051W	YGL032C	YGL019W	YHR177W	YDR254W	YDR315C	YER042W	YGR066C
YGL019W	YER076C	YKR035W-A	YGR158C	YOL110W	YDR197W	YER054C	YGL037C	YGL021W	YHR179W	YDR256C	YDR315C-1	YER046W	YGR072W
YGL025C	YER077C	YKR037C	YGR161C	YOL122C	YDR198C	YER055C	YGL038C	YGL025C	YHR187W	YDR261C	YDR315C-2	YER048W-A	YGR076C
YGL026C	YER078C	YKR043C	YGR165W	YOL131W	YDR201W	YER060W	YGL041C-B	YGL026C	YHR198C	YDR263C	YDR316W	YER051W	YGR078C
YGL029W	YER081W	YKR045C	YGR166W	YOL132W	YDR202C	YER061C	YGL048C	YGL029W	YHR209W	YDR265W	YDR320C	YER053C-A	YGR080W
YGL032C	YER082C	YKR049C	YGR167W	YOL135C	YDR205W	YER065C	YGL053W	YGL037C	YHR210C	YDR266C	YDR321W	YER054C	YGR084C
YGL039W	YER083C	YKR051W	YGR169C	YOL144W	YDR214W	YER066W	YGL058W	YGL040C	YIL003W	YDR268W	YDR322W	YER055C	YGR088W
YGL040C	YER086W	YKR067W	YGR169C-A	YOL151W	YDR218C	YER073W	YGL061C	YGL041C-B	YIL010W	YDR277C	YDR323C	YER057C	YGR089W
YGL041C-B	YER089C	YKR074W	YGR170W	YOL163W	YDR219C	YER074W-A	YGL063W	YGL047W	YIL016W	YDR283C	YDR324C	YER060W	YGR096W
YGL043W	YER091C	YKR080W	YGR173W	YOR006C	YDR221W	YER077C	YGL065C	YGL048C	YIL022W	YDR284C	YDR328C	YER061C	YGR099W
YGL048C	YER098W	YKR083C	YGR177C	YOR010C	YDR222W	YER078C	YGL067W	YGL049C	YIL024C	YDR285W	YDR330W	YER067W	YGR100W
YGL053W	YER099C	YKR098C	YGR178C	YOR012W	YDR223W	YER082C	YGL070C	YGL053W	YIL029C	YDR286C	YDR333C	YER069W	YGR101W
YGL058W	YER106W	YKR101W	YGR183C	YOR022C	YDR225W	YER083C	YGL075C	YGL058W	YIL034C	YDR287W	YDR339C	YER070W	YGR104C
YGL059W	YER107C	YKR104W	YGR188C	YOR031W	YDR226W	YER085C	YGL077C	YGL063W	YIL040W	YDR289C	YDR347W	YER073W	YGR111W
YGL060W	YER109C	YLL001W	YGR193C	YOR034C	YDR228C	YER086W	YGL078C	YGL065C	YIL044C	YDR292C	YDR350C	YER077C	YGR119C
YGL063W	YER112W	YLL006W-A	YGR201C	YOR038C	YDR233C	YER087W	YGL081W	YGL067W	YIL046W	YDR294C	YDR352W	YER078C	YGR121W-A
YGL065C	YER116C	YLL043W	YGR206W	YOR061W	YDR234W	YER089C	YGL087C	YGL075C	YIL050W	YDR295C	YDR353W	YER080W	YGR127W
YGL070C	YER122C	YLL046C	YGR207C	YOR099W	YDR236C	YER096W	YGL089C	YGL078C	YIL077C	YDR296W	YDR354W	YER091C	YGR131W
YGL077C	YER124C	YLL052C	YGR208W	YOR103C	YDR237W	YER098W	YGL091C	YGL080W	YIL078W	YDR297W	YDR357C	YER094C	YGR133W
YGL078C	YER127W	YLL056C	YGR209C	YOR104W	YDR238C	YER106W	YGL095C	YGL083W	YIL083C	YDR301W	YDR362C	YER096W	YGR143W
YGL080W	YER128W	YLL060C	YGR210C	YOR122C	YDR240C	YER107C	YGL100W	YGL086W	YIL084C	YDR304C	YDR364C	YER098W	YGR154C
YGL081W	YER130C	YLR009W	YGR215W	YOR127W	YDR242W	YER109C	YGL101W	YGL087C	YIL092W	YDR306C	YDR367W	YER107C	YGR158C
YGL087C	YER131W	YLR011W	YGR220C	YOR147W	YDR243C	YER115C	YGL103W	YGL089C	YIL096C	YDR307W	YDR368W	YER112W	YGR167W
YGL089C	YER140W	YLR012C	YGR226C	YOR156C	YDR245W	YER116C	YGL105W	YGL091C	YIL097W	YDR308C	YDR369C	YER114C	YGR171C
YGL095C	YER141W	YLR043C	YGR230W	YOR202W	YDR246W-A	YER122C	YGL107C	YGL093W	YIL098C	YDR309C	YDR371W	YER115C	YGR173W
YGL098W	YER143W	YLR051C	YGR231C	YOR212W	YDR247W	YER124C	YGL112C	YGL095C	YIL106W	YDR310C	YDR372C	YER122C	YGR174C
YGL099W	YER148W	YLR053C	YGR232W	YOR213C	YDR249C	YER127W	YGL119W	YGL099W	YIL108W	YDR311W	YDR373W	YER124C	YGR180C
YGL101W	YER157W	YLR079W	YGR236C	YOR237W	YDR253C	YER128W	YGL124C	YGL107C	YIL111W	YDR314C	YDR375C	YER125W	YGR187C
YGL103W	YER158C	YLR098C	YGR237C	YOR238W	YDR254W	YER137C	YGL126W	YGL108C	YIL113W	YDR315C	YDR376W	YER129W	YGR188C
YGL105W	YER159C	YLR102C	YGR240C	YOR242C	YDR255C	YER140W	YGL135W	YGL119W	YIL127C	YDR315C-1	YDR377W	YER132C	YGR194C
YGL112C	YER161C	YLR103C	YGR243W	YOR286W	YDR256C	YER143W	YGL138C	YGL121C	YIL138C	YDR316W	YDR378C	YER137C	YGR195W
YGL117W	YER163C	YLR113W	YGR249W	YOR293C-A	YDR261C	YER148W	YGL142C	YGL126W	YIL144W	YDR317W	YDR379C-A	YER140W	YGR196C
YGL119W	YER168C	YLR117C	YGR252W	YOR305W	YDR262W	YER153C	YGL143C	YGL134W	YIL145C	YDR319C	YDR381W	YER141W	YGR199W
YGL121C	YER171W	YLR126C	YGR253C	YOR306C	YDR263C	YER154W	YGL144C	YGL143C	YIL147C	YDR321W	YDR383C	YER142C	YGR204C-A
YGL124C	YER174C	YLR147C	YGR262C	YOR315W	YDR265W	YER161C	YGL158W	YGL145W-1	YIL154C	YDR323C	YDR384C	YER148W	YGR206W
YGL134W	YER175C	YLR151C	YGR267C	YOR316C	YDR266C	YER163C	YGL161C	YGL156W	YIL161W	YDR324C	YDR386W	YER150W	YGR207C
YGL135W	YER175W-A	YLR163C	YGR268C	YOR316C-A	YDR272W	YER168C	YGL162W	YGL158W	YIR003W	YDR325W	YDR387C	YER153C	YGR209C
YGL138C	YER180C	YLR164W	YGR282C	YOR324C	YDR277C	YER174C	YGL164C	YGL162W	YIR004W	YDR330W	YDR389W	YER156C	YGR211W
YGL139W	YER183C	YLR172C	YGR283C	YOR335C	YDR280W	YER175W-A	YGL167C	YGL169W	YIR005W	YDR333C	YDR390C	YER159C	YGR215W
YGL142C	YFL002C	YLR179C	YGR286C	YOR344C	YDR284C	YER176W	YGL168W	YGL170C	YIR010W	YDR339C	YDR394W	YER161C	YGR216C
YGL143C	YFL005W	YLR180W	YGR288W	YOR362C	YDR285W	YER180C	YGL170C	YGL171W	YIR013C	YDR346C	YDR397C	YER168C	YGR220C
YGL145W	YFL009W	YLR186W	YHL013C	YOR378W	YDR286C	YER180C-A	YGL171W	YGL172W	YIR015W	YDR347W	YDR399W	YER171W	YGR224W
YGL146C	YFL012W	YLR200W	YHL015W	YOR382W	YDR287W	YFL001W	YGL172W	YGL175C	YIR017C	YDR348C	YDR400W	YER173W	YGR225W
YGL158W	YFL013C	YLR203C	YHL015W-A	YPL002C	YDR289C	YFL002C	YGL174W	YGL176C	YIR030C	YDR353W	YDR402C	YER175C	YGR226C
YGL161C	YFL016C	YLR208W	YHL032C	YPL040C	YDR292C	YFL005W	YGL175C	YGL179C	YJL003W	YDR354W	YDR405W	YER180C-A	YGR231C
YGL162W	YFL018C	YLR211C	YHL039W	YPL054W	YDR294C	YFL009W	YGL176C	YGL202W	YJL013C	YDR356W	YDR408C	YER185W	YGR234W
YGL164C	YFL026W	YLR216C	YHL040C	YPL069C	YDR295C	YFL010C	YGL179C	YGL205W	YJL024C	YDR357C	YDR410C	YER186C	YGR238C
YGL168W	YFL028C	YLR226W	YHL042W	YPL086C	YDR297W	YFL012W	YGL185C	YGL208W	YJL027C	YDR362C	YDR416W	YFL002C	YGR240C
YGL170C	YFL029C	YLR246W	YHL043W	YPL098C	YDR299W	YFL013C	YGL192W	YGL209W	YJL033W	YDR363W-A	YDR419W	YFL005W	YGR244C
YGL171W	YFL030W	YLR251W	YHR011W	YPL099C	YDR301W	YFL017C	YGL196W	YGL212W	YJL037W	YDR367W	YDR421W	YFL012W	YGR246C
YGL172W	YFL038C	YLR260W	YHR012W	YPL107W	YDR304C	YFL018C	YGL201C	YGL230C	YJL038C	YDR368W	YDR422C	YFL013C	YGR249W
YGL174W	YFL041W-A	YLR262C-A	YHR013C	YPL111W	YDR305C	YFL022C	YGL202W	YGL235W	YJL047C	YDR369C	YDR427W	YFL016C	YGR252W
YGL175C	YFL052W	YLR264C-A	YHR017W	YPL121C	YDR306C	YFL027C	YGL210W	YGL236C	YJL054W	YDR371W	YDR428C	YFL017C	YGR255C
YGL185C	YFR001W	YLR265C	YHR018C	YPL123C	YDR307W	YFL028C	YGL212W	YGL241W	YJL055W	YDR373W	YDR434W	YFL018C	YGR257C
YGL192W	YFR004W	YLR266C	YHR022C	YPL139C	YDR308C	YFL034C-A	YGL221C	YGL242C	YJL059W	YDR375C	YDR436W	YFL026W	YGR261C
YGL196W	YFR009W	YLR286C	YHR022C-A	YPL148C	YDR310C	YFL038C	YGL226W	YGL245W	YJL063C	YDR376W	YDR447C	YFL027C	YGR262C
YGL201C	YFR010W	YLR287C	YHR024C	YPL170W	YDR311W	YFL042C	YGL228W	YGL246C	YJL065C	YDR377W	YDR449C	YFL029C	YGR263C
YGL210W	YFR013W	YLR295C	YHR029C	YPL172C	YDR314C	YFL045C	YGL230C	YGL248W	YJL066C	YDR378C	YDR451C	YFL030W	YGR264C
YGL212W	YFR015C	YLR304C	YHR030C	YPL178W	YDR315C	YFL049W	YGL237C	YGL249W	YJL073W	YDR381W	YDR460W	YFL042C	YGR267C
YGL221C	YFR017C	YLR307W	YHR031C	YPL189C-A	YDR315C-1	YFL050C	YGL240W	YGL250W	YJL074C	YDR382W	YDR461W	YFL045C	YGR268C
YGL222C	YFR022W	YLR324W	YHR033W	YPL189W	YDR315C-2	YFL052W	YGL242C	YGL252C	YJL085W	YDR384C	YDR463W	YFL047W	YGR271C-A
YGL225W	YFR025C	YLR325C	YHR035W	YPL201C	YDR316W	YFL054C	YGL245W	YGL254W	YJL088W	YDR386W	YDR465C	YFL049W	YGR273C
YGL226W	YFR026C	YLR328W	YHR038W	YPL210C	YDR317W	YFL060C	YGL246C	YGL257C	YJL090C	YDR387C	YDR466W	YFL052W	YGR285C
YGL231C	YFR030W	YLR332W	YHR039C	YPL211W	YDR319C	YFR001W	YGL250W	YGL258W	YJL099W	YDR389W	YDR468C	YFL054C	YGR286C
YGL235W	YFR032C	YLR341W	YHR046C	YPL246C	YDR320C	YFR006W	YGL253W	YGL259W	YJL100W	YDR390C	YDR473C	YFL060C	YHL003C
YGL240W	YFR033C	YLR352W	YHR059W	YPL250C	YDR321W	YFR009W	YGL257C	YGL261C	YJL102W	YDR393W	YDR478W	YFR003C	YHL008C
YGL245W	YFR034C	YLR363W-A	YHR061C	YPR005C	YDR322W	YFR015C	YGL258W	YGL263W	YJL103C	YDR394W	YDR479C	YFR006W	YHL011C
YGL246C	YFR039C	YLR370C	YHR064C	YPR007C	YDR323C	YFR017C	YGL259W	YGR004W	YJL104W	YDR397C	YDR480W	YFR010W	YHL013C
YGL250W	YFR043C	YLR373C	YHR065C	YPR016C	YDR324C	YFR022W	YGR004W	YGR015C	YJL105W	YDR399W	YDR482C	YFR015C	YHL014C
YGL252C	YFR044C	YLR375W	YHR066W	YPR024W	YDR330W	YFR023W	YGR005C	YGR016W	YJL107C	YDR402C	YDR484W	YFR016C	YHL015W-A
YGL253W	YFR045W	YLR390W	YHR070W	YPR025C	YDR333C	YFR025C	YGR007W	YGR017W	YJL117W	YDR404C	YDR485C	YFR017C	YHL019C
YGL257C	YFR047C	YLR404W	YHR071W	YPR032W	YDR339C	YFR033C	YGR013W	YGR020C	YJL121C	YDR405W	YDR488C	YFR022W	YHL040C
YGL261C	YFR048W	YLR405W	YHR072W-A	YPR035W	YDR346C	YFR034C	YGR020C	YGR026W	YJL122W	YDR408C	YDR489W	YFR025C	YHL042W
YGL262W	YFR051C	YLR408C	YHR077C	YPR056W	YDR350C	YFR036W	YGR021W	YGR029W	YJL125C	YDR409W	YDR496C	YFR027W	YHL043W
YGL263W	YFR052W	YLR426W	YHR083W	YPR057W	YDR352W	YFR037C	YGR026W	YGR030C	YJL126W	YDR410C	YDR498C	YFR030W	YHL047C
YGR007W	YFR053C	YLR438C-A	YHR084W	YPR060C	YDR353W	YFR038W	YGR034W	YGR031W	YJL132W	YDR419W	YDR499W	YFR031C	YHR004C
YGR013W	YFR055W	YLR443W	YHR086W-A	YPR066W	YDR354W	YFR044C	YGR037C	YGR035W-A	YJL145W	YDR421W	YDR502C	YFR037C	YHR007C-A
YGR016W	YGL001C	YLR453C	YHR088W	YPR068C	YDR357C	YFR045W	YGR038W	YGR036C	YJL147C	YDR422C	YDR504C	YFR038W	YHR011W
YGR017W	YGL004C	YLR455W	YHR090C	YPR071W	YDR362C	YFR046C	YGR046W	YGR037C	YJL151C	YDR427W	YDR506C	YFR039C	YHR014W
YGR021W	YGL005C	YLR459W	YHR100C	YPR078C	YDR363W-A	YFR048W	YGR048W	YGR038W	YJL160C	YDR428C	YDR510W	YFR042W	YHR022C
YGR026W	YGL006W	YML047C	YHR113W	YPR079W	YDR364C	YFR049W	YGR049W	YGR048W	YJL166W	YDR434W	YDR511W	YFR043C	YHR025W
YGR033C	YGL009C	YML054C-A	YHR114W	YPR093C	YDR367W	YFR050C	YGR053C	YGR049W	YJL173C	YDR436W	YDR513W	YFR044C	YHR028C
YGR034W	YGL010W	YML065W	YHR118C	YPR107C	YDR368W	YFR051C	YGR055W	YGR057C	YJL184W	YDR437W	YDR514C	YFR045W	YHR030C
YGR042W	YGL012W	YML066C	YHR120W	YPR138C	YDR369C	YFR052W	YGR060W	YGR063C	YJL185C	YDR451C	YDR515W	YFR046C	YHR032W
YGR045C	YGL015C	YML076C	YHR122W	YPR139C	YDR371W	YGL004C	YGR062C	YGR067C	YJL186W	YDR454C	YDR516C	YFR047C	YHR035W
YGR047C	YGL018C	YML079W	YHR129C	YPR158W	YDR372C	YGL005C	YGR065C	YGR072W	YJL193W	YDR459C	YDR517W	YFR049W	YHR037W
YGR048W	YGL019W	YML081C-A	YHR132W-A	YPR192W	YDR373W	YGL006W	YGR068C	YGR074W	YJL196C	YDR460W	YDR518W	YFR050C	YHR039C
YGR049W	YGL025C	YML094W	YHR133C	YPR200C	YDR376W	YGL006W-A	YGR072W	YGR075C	YJL200C	YDR461W	YDR519W	YFR051C	YHR045W
YGR062C	YGL026C	YML107C	YHR136C		YDR377W	YGL012W	YGR079W	YGR076C	YJL209W	YDR463W	YDR522C	YFR053C	YHR051W
YGR065C	YGL028C	YML116W	YHR138C		YDR378C	YGL017W	YGR088W	YGR078C	YJR003C	YDR465C	YDR523C	YFR055W	YHR061C
YGR066C	YGL037C	YML119W	YHR140W		YDR379C-A	YGL018C	YGR096W	YGR080W	YJR009C	YDR466W	YDR527W	YGL004C	YHR067W
YGR072W	YGL038C	YML125C	YHR143W		YDR381W	YGL025C	YGR100W	YGR088W	YJR013W	YDR476C	YDR529C	YGL005C	YHR072W-A
YGR080W	YGL039W	YMR001C-A	YHR143W-A		YDR382W	YGL026C	YGR104C	YGR089W	YJR022W	YDR478W	YDR530C	YGL006W	YHR075C
YGR084C	YGL041C-B	YMR048W	YHR150W		YDR383C	YGL028C	YGR105W	YGR093W	YJR024C	YDR479C	YDR531W	YGL006W-A	YHR076W
YGR088W	YGL043W	YMR060C	YHR151C		YDR384C	YGL029W	YGR109C	YGR095C	YJR025C	YDR480W	YDR532C	YGL010W	YHR077C
YGR089W	YGL045W	YMR067C	YHR153C		YDR386W	YGL031C	YGR111W	YGR096W	YJR032W	YDR481C	YDR533C	YGL018C	YHR081W
YGR093W	YGL048C	YMR070W	YHR154W		YDR387C	YGL038C	YGR117C	YGR101W	YJR050W	YDR482C	YDR536W	YGL021W	YHR086W-A
YGR101W	YGL050W	YMR085W	YHR156C		YDR389W	YGL045W	YGR118W	YGR104C	YJR052W	YDR485C	YDR538W	YGL032C	YHR088W
YGR102C	YGL053W	YMR089C	YHR158C		YDR390C	YGL047W	YGR119C	YGR105W	YJR055W	YDR486C	YEL001C	YGL037C	YHR091C
YGR104C	YGL054C	YMR092C	YHR159W		YDR393W	YGL048C	YGR121W-A	YGR112W	YJR057W	YDR488C	YEL003W	YGL039W	YHR092C
YGR111W	YGL059W	YMR094W	YHR160C		YDR399W	YGL053W	YGR124W	YGR116W	YJR060W	YDR489W	YEL004W	YGL040C	YHR097C
YGR112W	YGL061C	YMR095C	YHR162W		YDR400W	YGL062W	YGR126W	YGR119C	YJR063W	YDR490C	YEL006W	YGL041C-B	YHR101C
YGR113W	YGL062W	YMR096W	YHR163W		YDR402C	YGL064C	YGR127W	YGR121W-A	YJR067C	YDR494W	YEL009C	YGL043W	YHR110W
YGR116W	YGL063W	YMR112C	YHR171W		YDR405W	YGL065C	YGR129W	YGR127W	YJR068W	YDR496C	YEL011W	YGL047W	YHR112C
YGR117C	YGL064C	YMR133W	YHR175W-A		YDR408C	YGL067W	YGR130C	YGR132C	YJR069C	YDR499W	YEL012W	YGL049C	YHR113W
YGR119C	YGL065C	YMR135C	YHR176W		YDR409W	YGL070C	YGR132C	YGR140W	YJR080C	YDR503C	YEL015W	YGL053W	YHR118C
YGR121C	YGL067W	YMR139W	YHR177W		YDR416W	YGL077C	YGR135W	YGR143W	YJR082C	YDR504C	YEL016C	YGL054C	YHR121W
YGR124W	YGL070C	YMR155W	YHR179W		YDR419W	YGL079W	YGR136W	YGR145W	YJR085C	YDR506C	YEL018W	YGL058W	YHR122W
YGR127W	YGL075C	YMR160W	YHR181W		YDR421W	YGL080W	YGR138C	YGR149W	YJR086W	YDR510W	YEL026W	YGL059W	YHR123W
YGR131W	YGL080W	YMR170C	YHR182W		YDR427W	YGL081W	YGR146C	YGR150C	YJR094C	YDR511W	YEL029C	YGL060W	YHR127W
YGR135W	YGL081W	YMR171C	YHR190W		YDR428C	YGL082W	YGR146C-A	YGR153W	YJR101W	YDR512C	YEL037C	YGL061C	YHR131C
YGR136W	YGL083W	YMR172W	YHR191C		YDR434W	YGL083W	YGR148C	YGR154C	YJR106W	YDR513W	YEL040W	YGL062W	YHR132C
YGR138C	YGL084C	YMR184W	YHR192W		YDR437W	YGL086W	YGR149W	YGR161C	YJR110W	YDR514C	YEL041W	YGL063W	YHR133C
YGR146C	YGL086W	YMR188C	YHR199C-A		YDR446W	YGL087C	YGR153W	YGR165W	YJR116W	YDR515W	YEL042W	YGL064C	YHR135C
YGR148C	YGL087C	YMR193W	YHR209W		YDR447C	YGL089C	YGR155W	YGR166W	YJR117W	YDR516C	YEL046C	YGL065C	YHR136C
YGR153W	YGL091C	YMR194C-B	YHR210C		YDR449C	YGL090W	YGR158C	YGR169C	YJR120W	YDR517W	YEL048C	YGL067W	YHR140W
YGR155W	YGL093W	YMR211W	YIL003W		YDR450W	YGL091C	YGR166W	YGR169C-A	YJR124C	YDR518W	YEL051W	YGL070C	YHR148W
YGR158C	YGL095C	YMR217W	YIL004C		YDR451C	YGL095C	YGR168C	YGR171C	YJR134C	YDR519W	YEL052W	YGL075C	YHR151C
YGR167W	YGL100W	YMR220W	YIL006W		YDR454C	YGL096W	YGR173W	YGR173W	YJR135C	YDR522C	YEL056W	YGL077C	YHR154W
YGR168C	YGL104C	YMR233W	YIL010W		YDR459C	YGL098W	YGR174C	YGR180C	YJR142W	YDR524C	YEL057C	YGL079W	YHR156C
YGR169C-A	YGL107C	YMR243C	YIL020C		YDR460W	YGL107C	YGR175C	YGR187C	YJR144W	YDR527W	YEL058W	YGL080W	YHR157W
YGR174C	YGL108C	YMR257C	YIL023C		YDR461W	YGL108C	YGR177C	YGR188C	YJR152W	YDR530C	YEL062W	YGL081W	YHR158C
YGR175C	YGL112C	YMR267W	YIL024C		YDR465C	YGL117W	YGR180C	YGR194C	YJR153W	YDR531W	YEL063C	YGL082W	YHR176W
YGR194C	YGL120C	YMR268C	YIL029C		YDR466W	YGL119W	YGR187C	YGR199W	YKL002W	YDR532C	YEL066W	YGL083W	YHR177W
YGR195W	YGL133W	YMR279C	YIL034C		YDR468C	YGL120C	YGR189C	YGR200C	YKL006C-A	YDR533C	YER003C	YGL086W	YHR179W
YGR199W	YGL135W	YMR312W	YIL040W		YDR473C	YGL121C	YGR194C	YGR205W	YKL008C	YDR536W	YER005W	YGL087C	YHR181W
YGR200C	YGL139W	YMR315W-A	YIL041W		YDR476C	YGL124C	YGR199W	YGR206W	YKL011C	YDR538W	YER006W	YGL090W	YHR187W
YGR202C	YGL143C	YNL006W	YIL044C		YDR478W	YGL137W	YGR202C	YGR210C	YKL013C	YDR539W	YER007W	YGL091C	YHR190W
YGR206W	YGL145W-1	YNL011C	YIL046W-A		YDR479C	YGL140C	YGR205W	YGR211W	YKL015W	YDR541C	YER007W-1	YGL093W	YHR191C
YGR207C	YGL155W	YNL015W	YIL053W		YDR480W	YGL142C	YGR206W	YGR212W	YKL021C	YEL001C	YER010C	YGL094C	YHR192W
YGR211W	YGL159W	YNL029C	YIL060W		YDR481C	YGL143C	YGR210C	YGR213C	YKL023W	YEL003W	YER011W	YGL095C	YHR209W
YGR213C	YGL161C	YNL041C	YIL061C		YDR482C	YGL145W-1	YGR211W	YGR215W	YKL027W	YEL004W	YER012W	YGL098W	YIL003W
YGR224W	YGL162W	YNL046W	YIL067C		YDR484W	YGL146C	YGR213C	YGR223C	YKL037W	YEL009C	YER014C-A	YGL099W	YIL004C
YGR225W	YGL164C	YNL047C	YIL077C		YDR485C	YGL155W	YGR216C	YGR225W	YKL041W	YEL011W	YER016W	YGL101W	YIL005W
YGR226C	YGL166W	YNL058C	YIL083C		YDR488C	YGL158W	YGR220C	YGR226C	YKL043W	YEL012W	YER019W	YGL105W	YIL014W
YGR227W	YGL170C	YNL077W	YIL096C		YDR490C	YGL159W	YGR223C	YGR230W	YKL047W	YEL016C	YER021W	YGL108C	YIL016W
YGR229C	YGL171W	YNL084C	YIL098C		YDR494W	YGL161C	YGR224W	YGR231C	YKL049C	YEL018W	YER024W	YGL117W	YIL029C
YGR233C	YGL172W	YNL093W	YIL099W		YDR495C	YGL164C	YGR225W	YGR232W	YKL063C	YEL019C	YER025W	YGL119W	YIL031W
YGR234W	YGL185C	YNL113W	YIL106W		YDR496C	YGL166W	YGR227W	YGR233C	YKL067W	YEL023C	YER026C	YGL121C	YIL034C
YGR237C	YGL192W	YNL124W	YIL111W		YDR498C	YGL167C	YGR231C	YGR236C	YKL069W	YEL026W	YER034W	YGL122C	YIL040W
YGR238C	YGL194C	YNL127W	YIL113W		YDR499W	YGL168W	YGR232W	YGR237C	YKL072W	YEL029C	YER036C	YGL126W	YIL044C
YGR252W	YGL196W	YNL133C	YIL115C		YDR503C	YGL170C	YGR234W	YGR244C	YKL084W	YEL037C	YER039C-A	YGL127C	YIL046W
YGR253C	YGL202W	YNL152W	YIL120W		YDR504C	YGL171W	YGR236C	YGR249W	YKL087C	YEL039C	YER042W	YGL134W	YIL049W
YGR254W	YGL205W	YNL156C	YIL121W		YDR506C	YGL172W	YGR237C	YGR252W	YKL091C	YEL040W	YER046W	YGL138C	YIL051C
YGR255C	YGL208W	YNL157W	YIL122W		YDR510W	YGL175C	YGR244C	YGR261C	YKL093W	YEL041W	YER050C	YGL139W	YIL055C
YGR256W	YGL210W	YNL161W	YIL124W		YDR511W	YGL176C	YGR246C	YGR262C	YKL094W	YEL042W	YER051W	YGL144C	YIL067C
YGR257C	YGL212W	YNL162W-A	YIL127C		YDR514C	YGL179C	YGR252W	YGR263C	YKL095W	YEL046C	YER053C	YGL145W	YIL075C
YGR262C	YGL225W	YNL182C	YIL128W		YDR516C	YGL191W	YGR253C	YGR264C	YKL098W	YEL048C	YER053C-A	YGL153W	YIL079C
YGR263C	YGL226W	YNL183C	YIL134W		YDR517W	YGL192W	YGR257C	YGR267C	YKL099C	YEL050C	YER056C-A	YGL155W	YIL083C
YGR264C	YGL228W	YNL190W	YIL138C		YDR518W	YGL194C	YGR262C	YGR268C	YKL100C	YEL051W	YER058W	YGL159W	YIL084C
YGR267C	YGL236C	YNL194C	YIL140W		YDR519W	YGL196W	YGR263C	YGR271C-A	YKL103C	YEL052W	YER060W	YGL164C	YIL087C
YGR282C	YGL237C	YNL206C	YIL145C		YDR520C	YGL209W	YGR264C	YGR277C	YKL107W	YEL056W	YER063W	YGL166W	YIL092W
YGR283C	YGL241W	YNL210W	YIL147C		YDR522C	YGL212W	YGR268C	YGR286C	YKL113C	YEL058W	YER065C	YGL168W	YIL098C
YGR286C	YGL245W	YNL211C	YIL152W		YDR523C	YGL221C	YGR273C	YGR288W	YKL114C	YEL059C-A	YER066W	YGL172W	YIL106W
YGR288W	YGL246C	YNL232W	YIL155C		YDR527W	YGL222C	YGR279C	YHL004W	YKL116C	YEL060C	YER067W	YGL176C	YIL108W
YHL004W	YGL249W	YNL251C	YIR001C		YDR530C	YGL225W	YGR282C	YHL008C	YKL120W	YEL062W	YER068W	YGL194C	YIL111W
YHL008C	YGL252C	YNL252C	YIR004W		YDR531W	YGL230C	YGR283C	YHL009C	YKL122C	YEL063C	YER069W	YGL196W	YIL113W
YHL011C	YGL254W	YNL260C	YIR005W		YDR532C	YGL231C	YGR285C	YHL011C	YKL130C	YEL064C	YER070W	YGL202W	YIL114C
YHL014C	YGL259W	YNL277W	YIR010W		YDR536W	YGL234W	YGR288W	YHL013C	YKL132C	YEL066W	YER071C	YGL205W	YIL116W
YHL019C	YGL261C	YNL277W-A	YIR011C		YDR538W	YGL237C	YGR295C	YHL015W-A	YKL141W	YEL072W	YER073W	YGL208W	YIL121W
YHL027W	YGR001C	YNL280C	YIR015W		YDR539W	YGL242C	YHL008C	YHL019C	YKL142W	YER001W	YER076C	YGL209W	YIL127C
YHL040C	YGR003W	YNL283C	YIR017C		YDR541C	YGL246C	YHL009C	YHL039W	YKL143W	YER003C	YER077C	YGL231C	YIL138C
YHL042W	YGR004W	YNL284C	YIR021W		YEL001C	YGL249W	YHL011C	YHL043W	YKL149C	YER005W	YER078C	YGL234W	YIL144W
YHL043W	YGR005C	YNL289W	YIR022W		YEL003W	YGL252C	YHL013C	YHL047C	YKL154W	YER006W	YER080W	YGL237C	YIL145C
YHR004C	YGR007W	YNL290W	YIR025W		YEL004W	YGL253W	YHL014C	YHR001W-A	YKL155C	YER007C-A	YER081W	YGL242C	YIL147C
YHR006W	YGR013W	YNL291C	YIR027C		YEL006W	YGL254W	YHL019C	YHR004C	YKL161C	YER007W	YER082C	YGL245W	YIL153W
YHR009C	YGR015C	YNL292W	YIR030C		YEL009C	YGL261C	YHL031C	YHR007C-A	YKL167C	YER007W-1	YER083C	YGL246C	YIL155C
YHR011W	YGR020C	YNL293W	YIR036C		YEL011W	YGL263W	YHL033C	YHR013C	YKL184W	YER009W	YER087W	YGL248W	YIL157C
YHR012W	YGR021W	YNL307C	YIR038C		YEL016C	YGR001C	YHL039W	YHR014W	YKL186C	YER010C	YER088C	YGL249W	YIR003W
YHR013C	YGR026W	YNL308C	YIR039C		YEL018W	YGR004W	YHL040C	YHR017W	YKL187C	YER012W	YER089C	YGL253W	YIR004W
YHR014W	YGR028W	YNL313C	YJL023C		YEL019C	YGR007W	YHL047C	YHR018C	YKL190W	YER013W	YER091C	YGL254W	YIR010W
YHR018C	YGR029W	YNL314W	YJL027C		YEL023C	YGR008C	YHR001W-A	YHR024C	YKL194C	YER014C-A	YER094C	YGL257C	YIR011C
YHR021W-A	YGR034W	YNL316C	YJL036W		YEL026W	YGR017W	YHR006W	YHR025W	YKL195W	YER016W	YER096W	YGL262W	YIR015W
YHR022C	YGR035C	YNL317W	YJL037W		YEL029C	YGR021W	YHR009C	YHR033W	YKL204W	YER018C	YER098W	YGL263W	YIR018W
YHR024C	YGR037C	YNL326C	YJL043W		YEL037C	YGR026W	YHR011W	YHR034C	YKL214C	YER019W	YER099C	YGR003W	YIR030C
YHR025W	YGR038W	YNL330C	YJL044C		YEL039C	YGR028W	YHR012W	YHR037W	YKL221W	YER020W	YER101C	YGR005C	YIR035C
YHR026W	YGR041W	YNL333W	YJL047C		YEL041W	YGR029W	YHR013C	YHR039C	YKR004C	YER023W	YER106W	YGR007W	YIR039C
YHR028C	YGR042W	YNL334C	YJL060W		YEL048C	YGR030C	YHR014W	YHR042W	YKR008W	YER025W	YER107C	YGR015C	YJL002C
YHR030C	YGR045C	YNL335W	YJL061W		YEL050C	YGR031W	YHR026W	YHR045W	YKR009C	YER026C	YER112W	YGR016W	YJL006C
YHR032W	YGR047C	YNR001C	YJL062W-A		YEL051W	YGR033C	YHR032W	YHR046C	YKR013W	YER032W	YER115C	YGR017W	YJL020C
YHR035W	YGR048W	YNR002C	YJL065C		YEL052W	YGR034W	YHR033W	YHR049W	YKR024C	YER033C	YER116C	YGR020C	YJL023C
YHR037W	YGR049W	YNR003C	YJL066C		YEL056W	YGR035C	YHR034C	YHR051W	YKR029C	YER034W	YER117W	YGR021W	YJL027C
YHR039C	YGR053C	YNR015W	YJL068C		YEL057C	YGR035W-A	YHR037W	YHR058C	YKR030W	YER036C	YER122C	YGR029W	YJL033W
YHR045W	YGR057C	YNR033W	YJL072C		YEL058W	YGR036C	YHR039C	YHR059W	YKR036C	YER039C-A	YER123W	YGR030C	YJL036W
YHR046C	YGR062C	YNR054C	YJL073W		YEL060C	YGR037C	YHR042W	YHR061C	YKR037C	YER042W	YER124C	YGR033C	YJL038C
YHR048W	YGR063C	YNR055C	YJL074C		YEL062W	YGR041W	YHR045W	YHR066W	YKR039W	YER046W	YER127W	YGR035C	YJL055W
YHR050W	YGR067C	YNR060W	YJL077W-B		YEL063C	YGR042W	YHR048W	YHR070W	YKR041W	YER048W-A	YER128W	YGR035W-A	YJL062W-A
YHR051W	YGR068C	YNR061C	YJL078C		YEL064C	YGR045C	YHR050W	YHR071W	YKR043C	YER050C	YER129W	YGR037C	YJL063C
YHR064C	YGR072W	YNR062C	YJL094C		YEL072W	YGR047C	YHR064C	YHR072W-A	YKR044W	YER051W	YER130C	YGR038W	YJL065C
YHR065C	YGR079W	YNR066C	YJL099W		YER001W	YGR049W	YHR065C	YHR075C	YKR051W	YER053C	YER131W	YGR041W	YJL066C
YHR070W	YGR080W	YNR068C	YJL103C		YER003C	YGR057C	YHR066W	YHR076W	YKR056W	YER053C-A	YER136W	YGR042W	YJL068C
YHR075C	YGR084C	YNR069C	YJL105W		YER005W	YGR060W	YHR076W	YHR081W	YKR060W	YER055C	YER137C	YGR045C	YJL071W
YHR076W	YGR088W	YOL008W	YJL110C		YER006W	YGR062C	YHR081W	YHR086W-A	YKR061W	YER057C	YER140W	YGR047C	YJL072C
YHR077C	YGR097W	YOL009C	YJL116C		YER007C-A	YGR066C	YHR088W	YHR087W	YKR064W	YER058W	YER141W	YGR048W	YJL074C
YHR086W-A	YGR099W	YOL019W-A	YJL121C		YER007W	YGR068C	YHR090C	YHR088W	YKR070W	YER060W	YER142C	YGR053C	YJL077W-B
YHR088W	YGR101W	YOL031C	YJL125C		YER007W-1	YGR074W	YHR091C	YHR090C	YKR076W	YER061C	YER143W	YGR057C	YJL088W
YHR090C	YGR103W	YOL033W	YJL127C-B		YER009W	YGR076C	YHR092C	YHR092C	YKR082W	YER065C	YER148W	YGR063C	YJL094C
YHR097C	YGR104C	YOL038W	YJL137C		YER010C	YGR080W	YHR107C	YHR101C	YKR083C	YER066W	YER151C	YGR066C	YJL100W
YHR100C	YGR105W	YOL048C	YJL141C		YER011W	YGR084C	YHR110W	YHR107C	YKR087C	YER067W	YER153C	YGR067C	YJL103C
YHR107C	YGR108W	YOL056W	YJL143W		YER012W	YGR086C	YHR112C	YHR110W	YKR089C	YER069W	YER154W	YGR072W	YJL104W
YHR109W	YGR109C	YOL070C	YJL144W		YER014C-A	YGR088W	YHR113W	YHR111W	YKR098C	YER070W	YER156C	YGR074W	YJL105W
YHR111W	YGR111W	YOL071W	YJL146W		YER016W	YGR089W	YHR114W	YHR113W	YKR101W	YER071C	YER158C	YGR080W	YJL106W
YHR112C	YGR112W	YOL077W-A	YJL154C		YER018C	YGR093W	YHR115C	YHR120W	YLL004W	YER073W	YER159C	YGR084C	YJL110C
YHR113W	YGR113W	YOL082W	YJL156C		YER019W	YGR096W	YHR118C	YHR121W	YLL005C	YER074W-A	YER161C	YGR089W	YJL117W
YHR118C	YGR117C	YOL088C	YJL160C		YER021W	YGR099W	YHR121W	YHR122W	YLL006W-A	YER076C	YER163C	YGR093W	YJL118W
YHR121W	YGR119C	YOL093W	YJL166W		YER023W	YGR103W	YHR123W	YHR126C	YLL007C	YER077C	YER173W	YGR095C	YJL121C
YHR122W	YGR120C	YOL096C	YJL183W		YER026C	YGR104C	YHR127W	YHR127W	YLL025W	YER078C	YER174C	YGR096W	YJL123C
YHR123W	YGR121W-A	YOL097W-A	YJL184W		YER028C	YGR105W	YHR129C	YHR131C	YLL027W	YER080W	YER175C	YGR099W	YJL125C
YHR129C	YGR124W	YOL107W	YJL186W		YER039C-A	YGR109C	YHR132C	YHR132W-A	YLL035W	YER081W	YER175W-A	YGR101W	YJL126W
YHR131C	YGR126W	YOL122C	YJL193W		YER042W	YGR113W	YHR133C	YHR133C	YLL042C	YER082C	YER179W	YGR102C	YJL127C
YHR133C	YGR127W	YOL132W	YJL194W		YER046W	YGR117C	YHR135C	YHR136C	YLL043W	YER083C	YER182W	YGR104C	YJL133W
YHR135C	YGR132C	YOL137W	YJL196C		YER048W-A	YGR118W	YHR136C	YHR138C	YLL053C	YER085C	YER183C	YGR109C	YJL139C
YHR138C	YGR133W	YOL140W	YJL208C		YER050C	YGR121W-A	YHR143W	YHR140W	YLL060C	YER086W	YER185W	YGR111W	YJL143W
YHR140W	YGR136W	YOL143C	YJL209W		YER051W	YGR125W	YHR148W	YHR143W	YLR001C	YER088C	YER186C	YGR112W	YJL144W
YHR143W-A	YGR138C	YOL144W	YJL210W		YER053C	YGR131W	YHR151C	YHR143W-A	YLR009W	YER089C	YFL002C	YGR113W	YJL145W
YHR156C	YGR140W	YOL159C-A	YJR003C		YER053C-A	YGR136W	YHR156C	YHR148W	YLR011W	YER091C	YFL004W	YGR116W	YJL146W
YHR157W	YGR143W	YOL162W	YJR009C		YER055C	YGR138C	YHR157W	YHR154W	YLR015W	YER093C	YFL005W	YGR119C	YJL151C
YHR158C	YGR146C-A	YOR008C-A	YJR024C		YER056C-A	YGR143W	YHR159W	YHR156C	YLR016C	YER094C	YFL009W	YGR120C	YJL154C
YHR159W	YGR149W	YOR010C	YJR030C		YER058W	YGR146C	YHR163W	YHR158C	YLR020C	YER096W	YFL012W	YGR121W-A	YJL156C
YHR160C	YGR150C	YOR012W	YJR041C		YER060W	YGR149W	YHR168W	YHR159W	YLR021W	YER098W	YFL013C	YGR126W	YJL165C
YHR162W	YGR152C	YOR016C	YJR048W		YER061C	YGR150C	YHR171W	YHR162W	YLR025W	YER099C	YFL016C	YGR127W	YJL167W
YHR163W	YGR153W	YOR020C	YJR050W		YER063W	YGR153W	YHR175W-A	YHR167W	YLR036C	YER101C	YFL017C	YGR129W	YJL168C
YHR168W	YGR155W	YOR020W-A	YJR054W		YER065C	YGR154C	YHR176W	YHR171W	YLR040C	YER111C	YFL018C	YGR130C	YJL170C
YHR171W	YGR158C	YOR031W	YJR055W		YER066W	YGR155W	YHR177W	YHR175W-A	YLR051C	YER112W	YFL022C	YGR131W	YJL179W
YHR176W	YGR161C	YOR033C	YJR057W		YER067W	YGR161C	YHR179W	YHR176W	YLR053C	YER114C	YFL026W	YGR132C	YJL181W
YHR177W	YGR165W	YOR036W	YJR060W		YER068W	YGR165W	YHR182W	YHR177W	YLR054C	YER115C	YFL027C	YGR133W	YJL183W
YHR181W	YGR166W	YOR040W	YJR061W		YER069W	YGR167W	YHR183W	YHR179W	YLR056W	YER122C	YFL028C	YGR136W	YJL184W
YHR183W	YGR167W	YOR046C	YJR067C		YER070W	YGR169C-A	YHR190W	YHR181W	YLR063W	YER123W	YFL029C	YGR138C	YJL185C
YHR191C	YGR168C	YOR048C	YJR075W		YER071C	YGR173W	YHR198C	YHR187W	YLR066W	YER124C	YFL030W	YGR143W	YJL194W
YHR197W	YGR171C	YOR049C	YJR077C		YER073W	YGR174C	YHR199C	YHR190W	YLR070C	YER127W	YFL034C-A	YGR145W	YJL200C
YHR199C	YGR173W	YOR057W	YJR078W		YER074W	YGR175C	YHR206W	YHR191C	YLR082C	YER128W	YFL041W-A	YGR146C	YJL204C
YHR199C-A	YGR177C	YOR060C	YJR080C		YER074W-A	YGR177C	YIL009W	YHR192W	YLR084C	YER129W	YFL047W	YGR146C-A	YJL213W
YHR205W	YGR180C	YOR065W	YJR082C		YER076C	YGR180C	YIL022W	YHR197W	YLR085C	YER134C	YFL049W	YGR150C	YJL217W
YIL003W	YGR181W	YOR068C	YJR083C		YER077C	YGR183C	YIL023C	YHR198C	YLR099W-A	YER137C	YFL050C	YGR152C	YJR004C
YIL004C	YGR187C	YOR070C	YJR085C		YER078C	YGR187C	YIL024C	YHR199C	YLR100W	YER141W	YFL052W	YGR153W	YJR005W
YIL005W	YGR188C	YOR094W	YJR086W		YER080W	YGR189C	YIL034C	YHR210C	YLR103C	YER142C	YFL054C	YGR154C	YJR013W
YIL009W	YGR189C	YOR099W	YJR094C		YER081W	YGR193C	YIL041W	YIL003W	YLR104W	YER143W	YFL056C	YGR161C	YJR022W
YIL014W	YGR193C	YOR100C	YJR095W		YER082C	YGR194C	YIL046W	YIL005W	YLR114C	YER148W	YFL060C	YGR165W	YJR024C
YIL016W	YGR199W	YOR101W	YJR096W		YER085C	YGR195W	YIL053W	YIL006W	YLR118C	YER150W	YFR001W	YGR167W	YJR025C
YIL038C	YGR200C	YOR107W	YJR097W		YER086W	YGR200C	YIL057C	YIL010W	YLR119W	YER151C	YFR006W	YGR168C	YJR034W
YIL046W	YGR202C	YOR126C	YJR101W		YER091C	YGR201C	YIL064W	YIL022W	YLR126C	YER153C	YFR009W	YGR169C	YJR039W
YIL050W	YGR204C-A	YOR127W	YJR115W		YER094C	YGR202C	YIL067C	YIL026C	YLR132C	YER156C	YFR010W	YGR169C-A	YJR041C
YIL053W	YGR205W	YOR130C	YJR120W		YER096W	YGR204C-A	YIL069C	YIL029C	YLR135W	YER159C	YFR011C	YGR170W	YJR043C
YIL057C	YGR207C	YOR143C	YJR124C		YER099C	YGR205W	YIL072W	YIL035C	YLR145W	YER161C	YFR013W	YGR171C	YJR048W
YIL064W	YGR208W	YOR159C	YJR135C		YER101C	YGR206W	YIL074C	YIL040W	YLR146C	YER163C	YFR015C	YGR173W	YJR050W
YIL067C	YGR209C	YOR161C	YJR141W		YER106W	YGR207C	YIL075C	YIL046W	YLR147C	YER171W	YFR017C	YGR174C	YJR052W
YIL069C	YGR210C	YOR163W	YJR142W		YER107C	YGR209C	YIL076W	YIL051C	YLR151C	YER173W	YFR025C	YGR175C	YJR055W
YIL070C	YGR212W	YOR167C	YJR144W		YER109C	YGR210C	YIL078W	YIL055C	YLR164W	YER174C	YFR026C	YGR177C	YJR056C
YIL074C	YGR213C	YOR177C	YJR152W		YER116C	YGR211W	YIL079C	YIL057C	YLR165C	YER175C	YFR027W	YGR183C	YJR058C
YIL076W	YGR215W	YOR179C	YJR154W		YER117W	YGR212W	YIL083C	YIL061C	YLR170C	YER175W-A	YFR032C	YGR187C	YJR080C
YIL078W	YGR216C	YOR180C	YKL002W		YER122C	YGR216C	YIL085C	YIL064W	YLR173W	YER176W	YFR032C-B	YGR188C	YJR082C
YIL083C	YGR224W	YOR193W	YKL003C		YER123W	YGR220C	YIL089W	YIL067C	YLR174W	YER180C	YFR034C	YGR195W	YJR083C
YIL085C	YGR225W	YOR194C	YKL007W		YER124C	YGR223C	YIL092W	YIL070C	YLR182W	YER180C-A	YFR035C	YGR196C	YJR086W
YIL089W	YGR227W	YOR195W	YKL011C		YER127W	YGR224W	YIL094C	YIL074C	YLR186W	YER182W	YFR037C	YGR199W	YJR094C
YIL090W	YGR229C	YOR196C	YKL016C		YER128W	YGR225W	YIL096C	YIL077C	YLR190W	YER185W	YFR038W	YGR200C	YJR101W
YIL091C	YGR231C	YOR197W	YKL023W		YER130C	YGR226C	YIL097W	YIL083C	YLR192C	YER186C	YFR039C	YGR201C	YJR102C
YIL096C	YGR232W	YOR210W	YKL037W		YER131W	YGR227W	YIL099W	YIL084C	YLR211C	YFL002C	YFR040W	YGR204C-A	YJR104C
YIL098C	YGR233C	YOR220W	YKL039W		YER136W	YGR231C	YIL101C	YIL087C	YLR214W	YFL005W	YFR042W	YGR205W	YJR109C
YIL101C	YGR236C	YOR226C	YKL040C		YER137C	YGR232W	YIL106W	YIL088C	YLR218C	YFL008W	YFR044C	YGR208W	YJR115W
YIL108W	YGR237C	YOR229W	YKL041W		YER140W	YGR233C	YIL108W	YIL089W	YLR221C	YFL009W	YFR045W	YGR209C	YJR120W
YIL116W	YGR238C	YOR232W	YKL043W		YER142C	YGR234W	YIL116W	YIL096C	YLR226W	YFL010C	YFR046C	YGR210C	YJR124C
YIL120W	YGR244C	YOR238W	YKL046C		YER143W	YGR236C	YIL120W	YIL098C	YLR228C	YFL012W	YFR047C	YGR211W	YJR129C
YIL121W	YGR246C	YOR247W	YKL047W		YER148W	YGR237C	YIL121W	YIL099W	YLR233C	YFL013C	YFR048W	YGR212W	YJR130C
YIL122W	YGR249W	YOR262W	YKL049C		YER150W	YGR244C	YIL123W	YIL103W	YLR234W	YFL017C	YFR049W	YGR213C	YJR133W
YIL124W	YGR253C	YOR264W	YKL061W		YER153C	YGR246C	YIL124W	YIL106W	YLR237W	YFL018C	YFR050C	YGR215W	YJR134C
YIL127C	YGR255C	YOR280C	YKL063C		YER154W	YGR247W	YIL135C	YIL111W	YLR238W	YFL026W	YFR051C	YGR220C	YJR141W
YIL134W	YGR257C	YOR281C	YKL064W		YER156C	YGR254W	YIL138C	YIL113W	YLR239C	YFL028C	YFR055W	YGR223C	YJR153W
YIL138C	YGR262C	YOR286W	YKL067W		YER159C	YGR255C	YIL142W	YIL114C	YLR243W	YFL029C	YGL001C	YGR224W	YKL003C
YIL145C	YGR264C	YOR289W	YKL070W		YER161C	YGR256W	YIL152W	YIL115C	YLR246W	YFL030W	YGL004C	YGR225W	YKL008C
YIL152W	YGR267C	YOR297C	YKL071W		YER163C	YGR257C	YIL154C	YIL116W	YLR251W	YFL034C-A	YGL005C	YGR227W	YKL022C
YIL155C	YGR268C	YOR304C-A	YKL086W		YER171W	YGR263C	YIL155C	YIL120W	YLR254C	YFL038C	YGL006W-A	YGR230W	YKL023W
YIL157C	YGR277C	YOR308C	YKL087C		YER173W	YGR264C	YIL161W	YIL121W	YLR262C-A	YFL041W-A	YGL009C	YGR231C	YKL024C
YIL161W	YGR279C	YOR316C	YKL088W		YER174C	YGR268C	YIL164C	YIL127C	YLR264C-A	YFL042C	YGL015C	YGR232W	YKL025C
YIL164C	YGR282C	YOR354C	YKL089W		YER175C	YGR271C-A	YIR003W	YIL132C	YLR265C	YFL047W	YGL018C	YGR233C	YKL026C
YIR003W	YGR286C	YOR357C	YKL091C		YER175W-A	YGR273C	YIR005W	YIL134W	YLR266C	YFL049W	YGL019W	YGR234W	YKL027W
YIR005W	YGR288W	YOR362C	YKL093W		YER179W	YGR277C	YIR010W	YIL138C	YLR268W	YFL050C	YGL021W	YGR236C	YKL039W
YIR012W	YHL008C	YOR374W	YKL096W		YER180C	YGR279C	YIR016W	YIL140W	YLR270W	YFL052W	YGL025C	YGR240C	YKL040C
YIR013C	YHL010C	YOR378W	YKL098W		YER180C-A	YGR283C	YIR017C	YIL144W	YLR271W	YFL054C	YGL029W	YGR243W	YKL041W
YIR016W	YHL011C	YOR384W	YKL099C		YER182W	YGR286C	YIR021W	YIL145C	YLR273C	YFL056C	YGL037C	YGR244C	YKL043W
YIR021W	YHL014C	YPL041C	YKL100C		YER183C	YGR288W	YIR026C	YIL153W	YLR283W	YFL060C	YGL038C	YGR247W	YKL046C
YIR022W	YHL019C	YPL052W	YKL103C		YER185W	YHL004W	YIR027C	YIL154C	YLR284C	YFR003C	YGL039W	YGR249W	YKL047W
YIR026C	YHL022C	YPL059W	YKL112W		YER186C	YHL007C	YIR034C	YIL157C	YLR285C-A	YFR004W	YGL040C	YGR252W	YKL049C
YIR034C	YHL027W	YPL077C	YKL113C		YFL001W	YHL008C	YIR039C	YIL161W	YLR285W	YFR006W	YGL041C-B	YGR254W	YKL051W
YIR035C	YHL031C	YPL079W	YKL120W		YFL005W	YHL009C	YJL003W	YIR003W	YLR289W	YFR009W	YGL043W	YGR257C	YKL061W
YIR036C	YHL039W	YPL089C	YKL124W		YFL009W	YHL013C	YJL004C	YIR004W	YLR297W	YFR010W	YGL045W	YGR262C	YKL069W
YIR038C	YHL040C	YPL096W	YKL132C		YFL010C	YHL019C	YJL011C	YIR013C	YLR300W	YFR013W	YGL047W	YGR263C	YKL071W
YIR039C	YHL042W	YPL098C	YKL140W		YFL012W	YHL027W	YJL031C	YIR015W	YLR312C	YFR015C	YGL048C	YGR264C	YKL072W
YIR042C	YHR001W-A	YPL099C	YKL141W		YFL013C	YHL033C	YJL036W	YIR018W	YLR313C	YFR016C	YGL049C	YGR267C	YKL075C
YJL002C	YHR007C-A	YPL103C	YKL149C		YFL016C	YHL047C	YJL037W	YIR021W	YLR315W	YFR017C	YGL058W	YGR271C-A	YKL078W
YJL003W	YHR009C	YPL107W	YKL154W		YFL017C	YHR001W-A	YJL041W	YIR025W	YLR319C	YFR022W	YGL059W	YGR282C	YKL081W
YJL004C	YHR013C	YPL108W	YKL159C		YFL018C	YHR004C	YJL046W	YIR026C	YLR321C	YFR025C	YGL060W	YGR285C	YKL084W
YJL006C	YHR014W	YPL127C	YKL160W		YFL022C	YHR009C	YJL047C	YIR035C	YLR325C	YFR026C	YGL064C	YGR286C	YKL086W
YJL011C	YHR017W	YPL130W	YKL162C		YFL026W	YHR011W	YJL047C-A	YJL003W	YLR327C	YFR027W	YGL065C	YGR288W	YKL087C
YJL019W	YHR022C	YPL133C	YKL167C		YFL027C	YHR012W	YJL048C	YJL006C	YLR345W	YFR030W	YGL067W	YGR295C	YKL089W
YJL027C	YHR024C	YPL135W	YKL170W		YFL028C	YHR013C	YJL049W	YJL011C	YLR352W	YFR031C-A	YGL073W	YHL004W	YKL090W
YJL033W	YHR025W	YPL138C	YKL172W		YFL029C	YHR014W	YJL054W	YJL013C	YLR356W	YFR032C	YGL075C	YHL008C	YKL094W
YJL038C	YHR029C	YPL139C	YKL190W		YFL030W	YHR017W	YJL059W	YJL023C	YLR361C-A	YFR033C	YGL079W	YHL009C	YKL095W
YJL041W	YHR032W	YPL144W	YKL191W		YFL034C-A	YHR018C	YJL060W	YJL024C	YLR364W	YFR035C	YGL081W	YHL010C	YKL096W
YJL043W	YHR033W	YPL147W	YKL194C		YFL041W-A	YHR022C	YJL061W	YJL027C	YLR367W	YFR037C	YGL082W	YHL011C	YKL096W-A
YJL044C	YHR037W	YPL152W-A	YKL204W		YFL045C	YHR022C-A	YJL066C	YJL033W	YLR370C	YFR038W	YGL083W	YHL015W	YKL099C
YJL046W	YHR045W	YPL175W	YKL214C		YFL047W	YHR024C	YJL071W	YJL037W	YLR375W	YFR039C	YGL086W	YHL015W-A	YKL103C
YJL047C	YHR046C	YPL188W	YKL216W		YFL049W	YHR025W	YJL072C	YJL043W	YLR380W	YFR040W	YGL089C	YHL019C	YKL108W
YJL048C	YHR048W	YPL193W	YKR005C		YFL050C	YHR026W	YJL077C	YJL046W	YLR385C	YFR042W	YGL090W	YHL022C	YKL113C
YJL051W	YHR049W	YPL196W	YKR008W		YFL051C	YHR028C	YJL078C	YJL047C-A	YLR389C	YFR043C	YGL091C	YHL047C	YKL114C
YJL054W	YHR050W	YPL213W	YKR009C		YFL052W	YHR029C	YJL079C	YJL049W	YLR404W	YFR044C	YGL093W	YHR004C	YKL117W
YJL061W	YHR051W	YPL221W	YKR010C		YFL054C	YHR031C	YJL088W	YJL054W	YLR405W	YFR045W	YGL095C	YHR007C-A	YKL137W
YJL063C	YHR058C	YPL236C	YKR011C		YFL056C	YHR032W	YJL090C	YJL055W	YLR420W	YFR046C	YGL096W	YHR008C	YKL138C
YJL065C	YHR059W	YPL240C	YKR016W		YFL060C	YHR037W	YJL094C	YJL060W	YLR426W	YFR047C	YGL098W	YHR014W	YKL141W
YJL069C	YHR064C	YPL244C	YKR021W		YFR003C	YHR039C	YJL096W	YJL065C	YLR435W	YFR048W	YGL099W	YHR018C	YKL142W
YJL071W	YHR065C	YPL259C	YKR024C		YFR004W	YHR042W	YJL099W	YJL066C	YLR438W	YFR049W	YGL101W	YHR022C	YKL144C
YJL077C	YHR071W	YPL267W	YKR026C		YFR006W	YHR045W	YJL103C	YJL068C	YLR443W	YFR051C	YGL103W	YHR024C	YKL154W
YJL077W-B	YHR072W-A	YPL272C	YKR030W		YFR009W	YHR046C	YJL104W	YJL069C	YLR447C	YFR052W	YGL105W	YHR025W	YKL155C
YJL078C	YHR074W	YPR009W	YKR035W-A		YFR010W	YHR049W	YJL105W	YJL072C	YLR456W	YFR055W	YGL107C	YHR030C	YKL159C
YJL079C	YHR076W	YPR041W	YKR036C		YFR011C	YHR050W	YJL107C	YJL076W	YLR457C	YGL004C	YGL112C	YHR031C	YKL161C
YJL080C	YHR087W	YPR056W	YKR041W		YFR013W	YHR051W	YJL110C	YJL077W-B	YML014W	YGL005C	YGL117W	YHR035W	YKL165C
YJL085W	YHR088W	YPR058W	YKR043C		YFR025C	YHR058C	YJL111W	YJL079C	YML017W	YGL006W	YGL119W	YHR039C	YKL167C
YJL088W	YHR090C	YPR061C	YKR044W		YFR026C	YHR059W	YJL112W	YJL085W	YML018C	YGL009C	YGL121C	YHR046C	YKL170W
YJL090C	YHR092C	YPR067W	YKR049C		YFR027W	YHR061C	YJL115W	YJL088W	YML019W	YGL010W	YGL124C	YHR048W	YKL172W
YJL094C	YHR107C	YPR078C	YKR051W		YFR031C-A	YHR064C	YJL117W	YJL096W	YML020W	YGL011C	YGL126W	YHR051W	YKL173W
YJL099W	YHR109W	YPR094W	YKR055W		YFR032C	YHR065C	YJL118W	YJL099W	YML024W	YGL012W	YGL130W	YHR058C	YKL181W
YJL100W	YHR111W	YPR105C	YKR060W		YFR033C	YHR067W	YJL121C	YJL100W	YML027W	YGL014W	YGL133W	YHR059W	YKL184W
YJL102W	YHR112C	YPR108W	YKR061W		YFR034C	YHR071W	YJL122W	YJL101C	YML029W	YGL015C	YGL134W	YHR061C	YKL186C
YJL105W	YHR114W	YPR124W	YKR070W		YFR035C	YHR074W	YJL125C	YJL104W	YML038C	YGL017W	YGL135W	YHR071W	YKL190W
YJL106W	YHR117W	YPR133W-A	YKR075C		YFR036W	YHR075C	YJL127C	YJL115W	YML042W	YGL018C	YGL142C	YHR072W-A	YKL195W
YJL110C	YHR123W	YPR138C	YKR076W		YFR037C	YHR081W	YJL131C	YJL121C	YML043C	YGL019W	YGL143C	YHR075C	YKL209C
YJL112W	YHR127W	YPR139C	YKR077W		YFR038W	YHR086W-A	YJL133W	YJL123C	YML047C	YGL021W	YGL145W	YHR076W	YKR003W
YJL115W	YHR131C	YPR149W	YKR078W		YFR039C	YHR088W	YJL137C	YJL125C	YML048W	YGL025C	YGL145W-1	YHR077C	YKR007W
YJL117W	YHR132C	YPR166C	YKR080W		YFR040W	YHR090C	YJL139C	YJL126W	YML050W	YGL026C	YGL153W	YHR081W	YKR008W
YJL118W	YHR132W-A	YPR182W	YKR083C		YFR042W	YHR092C	YJL143W	YJL127C	YML054C-A	YGL029W	YGL158W	YHR083W	YKR009C
YJL122W	YHR134W	YPR185W	YKR091W		YFR043C	YHR097C	YJL145W	YJL127C-B	YML066C	YGL031C	YGL162W	YHR086W-A	YKR026C
YJL125C	YHR135C	YPR186C	YKR098C		YFR044C	YHR100C	YJL151C	YJL131C	YML079W	YGL032C	YGL164C	YHR087W	YKR037C
YJL126W	YHR136C		YKR104W		YFR045W	YHR101C	YJL155C	YJL137C	YML081C-A	YGL037C	YGL166W	YHR088W	YKR039W
YJL127C	YHR140W		YLL006W-A		YFR046C	YHR107C	YJL160C	YJL139C	YML101C	YGL038C	YGL167C	YHR091C	YKR043C
YJL128C	YHR143W		YLL007C		YFR047C	YHR109W	YJL166W	YJL141C	YML107C	YGL039W	YGL168W	YHR092C	YKR044W
YJL132W	YHR148W		YLL014W		YFR048W	YHR110W	YJL167W	YJL143W	YML110C	YGL041C-B	YGL169W	YHR101C	YKR045C
YJL133W	YHR150W		YLL025W		YFR049W	YHR111W	YJL170C	YJL144W	YML119W	YGL043W	YGL170C	YHR107C	YKR046C
YJL137C	YHR151C		YLL033W		YFR050C	YHR113W	YJL177W	YJL145W	YML120C	YGL044C	YGL171W	YHR109W	YKR055W
YJL141C	YHR156C		YLL038C		YFR051C	YHR114W	YJL178C	YJL147C	YML121W	YGL045W	YGL174W	YHR110W	YKR056W
YJL143W	YHR160C		YLL039C		YFR052W	YHR117W	YJL179W	YJL156C	YML125C	YGL047W	YGL175C	YHR111W	YKR058W
YJL145W	YHR163W		YLL041C		YFR053C	YHR118C	YJL183W	YJL160C	YML129C	YGL048C	YGL176C	YHR112C	YKR061W
YJL147C	YHR167W		YLL042C		YFR055W	YHR121W	YJL184W	YJL165C	YMR001C-A	YGL049C	YGL179C	YHR114W	YKR066C
YJL151C	YHR171W		YLL043W		YGL004C	YHR126C	YJL185C	YJL167W	YMR013W-A	YGL053W	YGL185C	YHR120W	YKR067W
YJL155C	YHR182W		YLL051C		YGL005C	YHR127W	YJL191W	YJL168C	YMR016C	YGL054C	YGL192W	YHR122W	YKR070W
YJL156C	YHR183W		YLL053C		YGL006W-A	YHR129C	YJL194W	YJL179W	YMR018W	YGL058W	YGL194C	YHR123W	YKR074W
YJL167W	YHR187W		YLL060C		YGL009C	YHR131C	YJL196C	YJL184W	YMR020W	YGL059W	YGL196W	YHR132C	YKR082W
YJL173C	YHR189W		YLR001C		YGL010W	YHR132C	YJL200C	YJL186W	YMR026C	YGL060W	YGL201C	YHR134W	YKR085C
YJL177W	YHR191C		YLR009W		YGL011C	YHR133C	YJL203W	YJL200C	YMR029C	YGL062W	YGL202W	YHR136C	YKR098C
YJL178C	YHR192W		YLR011W		YGL012W	YHR134W	YJL208C	YJL203W	YMR031C	YGL063W	YGL205W	YHR137W	YKR103W
YJL183W	YHR199C		YLR016C		YGL015C	YHR137W	YJL210W	YJL210W	YMR034C	YGL064C	YGL208W	YHR138C	YLL001W
YJL185C	YHR205W		YLR021W		YGL017W	YHR143W-A	YJR003C	YJL217W	YMR035W	YGL065C	YGL209W	YHR139C	YLL004W
YJL186W	YHR206W		YLR038C		YGL018C	YHR150W	YJR004C	YJR004C	YMR036C	YGL067W	YGL210W	YHR140W	YLL005C
YJL191W	YHR210C		YLR040C		YGL019W	YHR151C	YJR005W	YJR005W	YMR041C	YGL073W	YGL212W	YHR143W-A	YLL007C
YJL193W	YIL004C		YLR042C		YGL021W	YHR153C	YJR009C	YJR013W	YMR060C	YGL075C	YGL221C	YHR148W	YLL010C
YJL200C	YIL010W		YLR043C		YGL025C	YHR157W	YJR015W	YJR022W	YMR079W	YGL077C	YGL222C	YHR151C	YLL013C
YJL209W	YIL022W		YLR047C		YGL026C	YHR158C	YJR022W	YJR025C	YMR094W	YGL079W	YGL225W	YHR153C	YLL025W
YJR003C	YIL029C		YLR049C		YGL028C	YHR159W	YJR025C	YJR030C	YMR107W	YGL080W	YGL226W	YHR154W	YLL027W
YJR004C	YIL035C		YLR051C		YGL029W	YHR162W	YJR032W	YJR033C	YMR112C	YGL081W	YGL228W	YHR156C	YLL032C
YJR008W	YIL040W		YLR053C		YGL031C	YHR163W	YJR042W	YJR034W	YMR114C	YGL082W	YGL230C	YHR157W	YLL033W
YJR009C	YIL044C		YLR054C		YGL032C	YHR167W	YJR043C	YJR043C	YMR123W	YGL083W	YGL231C	YHR160C	YLL035W
YJR013W	YIL046W		YLR063W		YGL037C	YHR168W	YJR049C	YJR048W	YMR133W	YGL084C	YGL235W	YHR162W	YLL036C
YJR015W	YIL053W		YLR064W		YGL038C	YHR171W	YJR052W	YJR052W	YMR139W	YGL086W	YGL236C	YHR167W	YLL038C
YJR022W	YIL055C		YLR065C		YGL039W	YHR175W-A	YJR054W	YJR055W	YMR144W	YGL087C	YGL237C	YHR175W-A	YLL042C
YJR024C	YIL067C		YLR066W		YGL040C	YHR177W	YJR056C	YJR057W	YMR146C	YGL090W	YGL240W	YHR176W	YLL053C
YJR025C	YIL069C		YLR078C		YGL041C-B	YHR179W	YJR058C	YJR058C	YMR147W	YGL091C	YGL242C	YHR177W	YLL056C
YJR032W	YIL070C		YLR082C		YGL043W	YHR187W	YJR063W	YJR060W	YMR148W	YGL093W	YGL245W	YHR179W	YLL060C
YJR039W	YIL072W		YLR083C		YGL044C	YHR190W	YJR069C	YJR061W	YMR153W	YGL094C	YGL246C	YHR181W	YLL062C
YJR042W	YIL074C		YLR091W		YGL047W	YHR191C	YJR073C	YJR068W	YMR155W	YGL095C	YGL248W	YHR190W	YLL063C
YJR054W	YIL078W		YLR093C		YGL048C	YHR192W	YJR075W	YJR073C	YMR156C	YGL098W	YGL249W	YHR192W	YLR009W
YJR055W	YIL079C		YLR096W		YGL050W	YHR197W	YJR078W	YJR074W	YMR158W	YGL099W	YGL250W	YHR199C	YLR010C
YJR056C	YIL085C		YLR098C		YGL054C	YHR199C-A	YJR080C	YJR083C	YMR161W	YGL100W	YGL252C	YHR205W	YLR011W
YJR067C	YIL087C		YLR099W-A		YGL058W	YHR206W	YJR095W	YJR096W	YMR166C	YGL101W	YGL253W	YHR206W	YLR013W
YJR068W	YIL088C		YLR100W		YGL059W	YHR209W	YJR096W	YJR097W	YMR168C	YGL107C	YGL254W	YHR209W	YLR015W
YJR069C	YIL090W		YLR102C		YGL060W	YHR210C	YJR100C	YJR099W	YMR174C	YGL108C	YGL257C	YHR210C	YLR033W
YJR075W	YIL091C		YLR104W		YGL061C	YIL003W	YJR101W	YJR100C	YMR175W	YGL110C	YGL258W	YIL003W	YLR034C
YJR077C	YIL094C		YLR113W		YGL062W	YIL004C	YJR102C	YJR102C	YMR180C	YGL112C	YGL259W	YIL004C	YLR035C
YJR078W	YIL096C		YLR117C		YGL063W	YIL005W	YJR103W	YJR104C	YMR181C	YGL117W	YGL262W	YIL009C-A	YLR038C
YJR082C	YIL097W		YLR119W		YGL064C	YIL006W	YJR106W	YJR110W	YMR182C	YGL121C	YGL263W	YIL009W	YLR043C
YJR085C	YIL099W		YLR120C		YGL065C	YIL010W	YJR124C	YJR115W	YMR182W-A	YGL126W	YGR001C	YIL010W	YLR049C
YJR096W	YIL106W		YLR126C		YGL067W	YIL016W	YJR125C	YJR116W	YMR184W	YGL127C	YGR003W	YIL022W	YLR051C
YJR100C	YIL108W		YLR129W		YGL070C	YIL023C	YJR130C	YJR117W	YMR188C	YGL133W	YGR004W	YIL026C	YLR056W
YJR102C	YIL121W		YLR132C		YGL073W	YIL024C	YJR133W	YJR120W	YMR194C-B	YGL134W	YGR005C	YIL031W	YLR066W
YJR103W	YIL122W		YLR141W		YGL075C	YIL035C	YJR139C	YJR129C	YMR197C	YGL138C	YGR007W	YIL034C	YLR073C
YJR104C	YIL123W		YLR142W		YGL077C	YIL038C	YJR141W	YJR130C	YMR198W	YGL139W	YGR015C	YIL038C	YLR078C
YJR116W	YIL127C		YLR164W		YGL078C	YIL040W	YJR142W	YJR133W	YMR217W	YGL140C	YGR016W	YIL040W	YLR086W
YJR120W	YIL128W		YLR168C		YGL079W	YIL044C	YJR148W	YJR135C	YMR225C	YGL141W	YGR020C	YIL041W	YLR093C
YJR124C	YIL132C		YLR170C		YGL080W	YIL049W	YJR150C	YJR141W	YMR232W	YGL142C	YGR021W	YIL044C	YLR098C
YJR129C	YIL134W		YLR174W		YGL081W	YIL050W	YJR154W	YJR144W	YMR233W	YGL143C	YGR026W	YIL050W	YLR099W-A
YJR134C	YIL140W		YLR179C		YGL082W	YIL053W	YKL001C	YJR152W	YMR234W	YGL144C	YGR033C	YIL060W	YLR109W
YJR135C	YIL142W		YLR180W		YGL084C	YIL055C	YKL004W	YJR153W	YMR244C-A	YGL145W	YGR034W	YIL070C	YLR114C
YJR142W	YIL144W		YLR186W		YGL086W	YIL061C	YKL006C-A	YJR154W	YMR244W	YGL145W-1	YGR035C	YIL072W	YLR116W
YJR148W	YIL145C		YLR189C		YGL087C	YIL067C	YKL006W	YKL006C-A	YMR265C	YGL146C	YGR035W-A	YIL076W	YLR118C
YJR150C	YIL155C		YLR190W		YGL089C	YIL069C	YKL007W	YKL007W	YMR267W	YGL153W	YGR037C	YIL077C	YLR120C
YJR152W	YIL157C		YLR201C		YGL090W	YIL070C	YKL008C	YKL008C	YMR268C	YGL155W	YGR038W	YIL078W	YLR132C
YJR153W	YIL161W		YLR208W		YGL091C	YIL072W	YKL009W	YKL011C	YMR270C	YGL156W	YGR041W	YIL085C	YLR133W
YJR154W	YIL164C		YLR211C		YGL095C	YIL074C	YKL013C	YKL015W	YMR272C	YGL158W	YGR042W	YIL088C	YLR135W
YKL004W	YIR003W		YLR212C		YGL096W	YIL077C	YKL016C	YKL016C	YMR279C	YGL161C	YGR048W	YIL089W	YLR136C
YKL006C-A	YIR004W		YLR214W		YGL098W	YIL078W	YKL025C	YKL021C	YMR284W	YGL163C	YGR049W	YIL090W	YLR137W
YKL007W	YIR005W		YLR216C		YGL099W	YIL079C	YKL037W	YKL023W	YMR285C	YGL164C	YGR052W	YIL093C	YLR141W
YKL008C	YIR007W		YLR218C		YGL100W	YIL083C	YKL039W	YKL024C	YMR286W	YGL166W	YGR053C	YIL096C	YLR142W
YKL009W	YIR010W		YLR224W		YGL101W	YIL085C	YKL046C	YKL025C	YMR289W	YGL168W	YGR055W	YIL097W	YLR143W
YKL013C	YIR011C		YLR228C		YGL103W	YIL087C	YKL047W	YKL040C	YMR292W	YGL169W	YGR060W	YIL098C	YLR144C
YKL016C	YIR012W		YLR234W		YGL105W	YIL088C	YKL049C	YKL041W	YMR294W	YGL170C	YGR062C	YIL099W	YLR151C
YKL021C	YIR015W		YLR239C		YGL107C	YIL089W	YKL051W	YKL043W	YMR296C	YGL171W	YGR063C	YIL103W	YLR152C
YKL022C	YIR016W		YLR253W		YGL108C	YIL092W	YKL062W	YKL046C	YMR298W	YGL173C	YGR066C	YIL106W	YLR165C
YKL023W	YIR017C		YLR254C		YGL112C	YIL093C	YKL063C	YKL047W	YMR300C	YGL174W	YGR072W	YIL108W	YLR170C
YKL024C	YIR021W		YLR260W		YGL115W	YIL096C	YKL074C	YKL048C	YMR303C	YGL175C	YGR074W	YIL111W	YLR172C
YKL037W	YIR025W		YLR262C-A		YGL117W	YIL097W	YKL075C	YKL049C	YMR311C	YGL176C	YGR078C	YIL114C	YLR174W
YKL040C	YIR027C		YLR264C-A		YGL119W	YIL098C	YKL078W	YKL053C-A	YMR315W	YGL179C	YGR079W	YIL116W	YLR179C
YKL043W	YIR034C		YLR264W		YGL121C	YIL099W	YKL079W	YKL061W	YMR322C	YGL185C	YGR088W	YIL121W	YLR180W
YKL046C	YIR038C		YLR265C		YGL124C	YIL101C	YKL080W	YKL067W	YNL005C	YGL192W	YGR089W	YIL123W	YLR186W
YKL047W	YIR042C		YLR267W		YGL126W	YIL106W	YKL087C	YKL071W	YNL010W	YGL194C	YGR095C	YIL127C	YLR189C
YKL049C	YJL002C		YLR268W		YGL127C	YIL114C	YKL088W	YKL072W	YNL015W	YGL196W	YGR096W	YIL132C	YLR190W
YKL051W	YJL004C		YLR271W		YGL130W	YIL116W	YKL089W	YKL074C	YNL016W	YGL201C	YGR097W	YIL134W	YLR199C
YKL062W	YJL011C		YLR273C		YGL134W	YIL120W	YKL090W	YKL075C	YNL024C	YGL202W	YGR099W	YIL140W	YLR200W
YKL063C	YJL013C		YLR283W		YGL135W	YIL124W	YKL093W	YKL078W	YNL029C	YGL205W	YGR100W	YIL142W	YLR203C
YKL071W	YJL019W		YLR285C-A		YGL138C	YIL132C	YKL095W	YKL079W	YNL030W	YGL208W	YGR102C	YIL147C	YLR208W
YKL074C	YJL020C		YLR285W		YGL142C	YIL134W	YKL096W	YKL080W	YNL032W	YGL209W	YGR103W	YIL154C	YLR210W
YKL075C	YJL023C		YLR286C		YGL143C	YIL135C	YKL096W-A	YKL084W	YNL046W	YGL212W	YGR105W	YIL157C	YLR215C
YKL079W	YJL024C		YLR289W		YGL144C	YIL142W	YKL099C	YKL086W	YNL070W	YGL221C	YGR109C	YIL164C	YLR216C
YKL080W	YJL025W		YLR295C		YGL145W	YIL144W	YKL100C	YKL088W	YNL080C	YGL222C	YGR111W	YIR003W	YLR221C
YKL082C	YJL036W		YLR297W		YGL145W-1	YIL145C	YKL103C	YKL089W	YNL084C	YGL225W	YGR112W	YIR004W	YLR225C
YKL086W	YJL044C		YLR298C		YGL146C	YIL155C	YKL104C	YKL090W	YNL090W	YGL226W	YGR116W	YIR005W	YLR234W
YKL088W	YJL046W		YLR299W		YGL155W	YIL161W	YKL107W	YKL091C	YNL107W	YGL228W	YGR117C	YIR007W	YLR238W
YKL089W	YJL047C		YLR304C		YGL158W	YIL164C	YKL108W	YKL094W	YNL108C	YGL235W	YGR119C	YIR010W	YLR239C
YKL093W	YJL047C-A		YLR306W		YGL159W	YIR001C	YKL110C	YKL096W	YNL113W	YGL236C	YGR120C	YIR011C	YLR242C
YKL095W	YJL049W		YLR307W		YGL161C	YIR003W	YKL112W	YKL096W-A	YNL126W	YGL237C	YGR124W	YIR012W	YLR253W
YKL096W	YJL055W		YLR313C		YGL162W	YIR004W	YKL113C	YKL100C	YNL128W	YGL240W	YGR126W	YIR013C	YLR254C
YKL096W-A	YJL059W		YLR314C		YGL163C	YIR005W	YKL116C	YKL104C	YNL129W	YGL241W	YGR129W	YIR015W	YLR260W
YKL098W	YJL063C		YLR321C		YGL164C	YIR007W	YKL117W	YKL108W	YNL131W	YGL242C	YGR130C	YIR018W	YLR262C
YKL099C	YJL065C		YLR324W		YGL166W	YIR010W	YKL120W	YKL110C	YNL133C	YGL245W	YGR131W	YIR021W	YLR264C-A
YKL103C	YJL066C		YLR325C		YGL167C	YIR013C	YKL124W	YKL113C	YNL137C	YGL246C	YGR133W	YIR024C	YLR265C
YKL104C	YJL068C		YLR327C		YGL168W	YIR016W	YKL126W	YKL116C	YNL138W	YGL248W	YGR135W	YIR025W	YLR266C
YKL110C	YJL069C		YLR328W		YGL169W	YIR018W	YKL130C	YKL120W	YNL142W	YGL249W	YGR143W	YIR026C	YLR268W
YKL112W	YJL071W		YLR341W		YGL170C	YIR021W	YKL132C	YKL126W	YNL146C-A	YGL250W	YGR146C	YIR027C	YLR273C
YKL113C	YJL072C		YLR345W		YGL171W	YIR026C	YKL139W	YKL135C	YNL146W	YGL252C	YGR148C	YIR030C	YLR284C
YKL114C	YJL073W		YLR346C		YGL172W	YIR038C	YKL140W	YKL139W	YNL149C	YGL253W	YGR149W	YIR034C	YLR285W
YKL117W	YJL077C		YLR361C		YGL174W	YIR039C	YKL142W	YKL140W	YNL152W	YGL254W	YGR150C	YIR035C	YLR287C
YKL119C	YJL078C		YLR361C-A		YGL175C	YIR042C	YKL143W	YKL141W	YNL153C	YGL257C	YGR152C	YIR038C	YLR287C-A
YKL130C	YJL084C		YLR363W-A		YGL176C	YJL004C	YKL150W	YKL142W	YNL156C	YGL259W	YGR154C	YIR042C	YLR288C
YKL132C	YJL087C		YLR369W		YGL178W	YJL006C	YKL156W	YKL143W	YNL158W	YGL263W	YGR155W	YJL002C	YLR289W
YKL137W	YJL090C		YLR372W		YGL179C	YJL023C	YKL159C	YKL144C	YNL159C	YGR004W	YGR158C	YJL003W	YLR292C
YKL138C	YJL094C		YLR373C		YGL185C	YJL024C	YKL162C	YKL149C	YNL162W-A	YGR005C	YGR165W	YJL011C	YLR295C
YKL139W	YJL096W		YLR375W		YGL192W	YJL027C	YKL170W	YKL150W	YNL163C	YGR007W	YGR166W	YJL013C	YLR300W
YKL140W	YJL099W		YLR385C		YGL194C	YJL033W	YKL172W	YKL154W	YNL168C	YGR008C	YGR167W	YJL019W	YLR304C
YKL143W	YJL102W		YLR399C		YGL196W	YJL036W	YKL173W	YKL155C	YNL173C	YGR013W	YGR168C	YJL024C	YLR305C
YKL148C	YJL104W		YLR404W		YGL201C	YJL044C	YKL174C	YKL159C	YNL180C	YGR015C	YGR169C-A	YJL025W	YLR309C
YKL154W	YJL105W		YLR406C-A		YGL202W	YJL047C-A	YKL180W	YKL161C	YNL182C	YGR016W	YGR170W	YJL027C	YLR318W
YKL157W	YJL106W		YLR408C		YGL205W	YJL051W	YKL185W	YKL162C	YNL202W	YGR017W	YGR171C	YJL031C	YLR319C
YKL160W	YJL107C		YLR412C-A		YGL208W	YJL059W	YKL189W	YKL165C	YNL204C	YGR020C	YGR173W	YJL036W	YLR323C
YKL162C	YJL115W		YLR415C		YGL209W	YJL060W	YKL192C	YKL167C	YNL215W	YGR021W	YGR174C	YJL037W	YLR324W
YKL172W	YJL118W		YLR419W		YGL210W	YJL062W-A	YKL204W	YKL170W	YNL220W	YGR026W	YGR174W-A	YJL041W	YLR327C
YKL174C	YJL121C		YLR420W		YGL212W	YJL066C	YKL216W	YKL172W	YNL222W	YGR029W	YGR177C	YJL042W	YLR328W
YKL179C	YJL123C		YLR426W		YGL221C	YJL071W	YKR003W	YKL174C	YNL225C	YGR030C	YGR178C	YJL047C	YLR341W
YKL181W	YJL124C		YLR431C		YGL222C	YJL072C	YKR007W	YKL179C	YNL236W	YGR033C	YGR180C	YJL048C	YLR346C
YKL184W	YJL125C		YLR432W		YGL225W	YJL073W	YKR013W	YKL181W	YNL238W	YGR034W	YGR181W	YJL055W	YLR355C
YKL192C	YJL126W		YLR438W		YGL226W	YJL077C	YKR016W	YKL187C	YNL243W	YGR035C	YGR183C	YJL059W	YLR369W
YKL204W	YJL127C		YLR442C		YGL228W	YJL078C	YKR024C	YKL189W	YNL244C	YGR035W-A	YGR187C	YJL060W	YLR370C
YKL205W	YJL133W		YLR446W		YGL231C	YJL080C	YKR026C	YKL191W	YNL252C	YGR037C	YGR189C	YJL062W-A	YLR372W
YKL220C	YJL137C		YLR457C		YGL236C	YJL081C	YKR029C	YKL194C	YNL254C	YGR038W	YGR193C	YJL063C	YLR373C
YKL221W	YJL138C		YLR461W		YGL237C	YJL085W	YKR030W	YKL195W	YNL263C	YGR041W	YGR194C	YJL066C	YLR375W
YKR003W	YJL139C		YML021C		YGL240W	YJL088W	YKR038C	YKL204W	YNL269W	YGR042W	YGR195W	YJL069C	YLR380W
YKR007W	YJL141C		YML023C		YGL245W	YJL090C	YKR041W	YKL209C	YNL272C	YGR045C	YGR196C	YJL071W	YLR389C
YKR008W	YJL143W		YML027W		YGL246C	YJL094C	YKR043C	YKL215C	YNL275W	YGR047C	YGR199W	YJL073W	YLR392C
YKR011C	YJL144W		YML043C		YGL248W	YJL096W	YKR045C	YKL216W	YNL289W	YGR048W	YGR201C	YJL074C	YLR405W
YKR016W	YJL146W		YML048W		YGL250W	YJL099W	YKR046C	YKL220C	YNL290W	YGR049W	YGR202C	YJL076W	YLR410W
YKR026C	YJL147C		YML050W		YGL252C	YJL102W	YKR049C	YKL221W	YNL291C	YGR053C	YGR204C-A	YJL077W-B	YLR419W
YKR030W	YJL148W		YML054C-A		YGL253W	YJL103C	YKR055W	YKR005C	YNL292W	YGR055W	YGR205W	YJL079C	YLR420W
YKR038C	YJL155C		YML058W-A		YGL254W	YJL106W	YKR060W	YKR008W	YNL293W	YGR057C	YGR206W	YJL087C	YLR422W
YKR039W	YJL156C		YML065W		YGL257C	YJL111W	YKR061W	YKR009C	YNL295W	YGR063C	YGR207C	YJL090C	YLR425W
YKR041W	YJL160C		YML066C		YGL258W	YJL112W	YKR062W	YKR011C	YNL306W	YGR066C	YGR208W	YJL094C	YLR427W
YKR043C	YJL166W		YML071C		YGL259W	YJL115W	YKR066C	YKR013W	YNL307C	YGR067C	YGR210C	YJL096W	YLR431C
YKR046C	YJL167W		YML078W		YGL261C	YJL117W	YKR076W	YKR024C	YNL314W	YGR070W	YGR211W	YJL099W	YLR438C-A
YKR052C	YJL177W		YML081C-A		YGR003W	YJL121C	YKR077W	YKR026C	YNL325C	YGR072W	YGR213C	YJL100W	YLR442C
YKR058W	YJL178C		YML086C		YGR004W	YJL125C	YKR080W	YKR029C	YNL326C	YGR074W	YGR215W	YJL102W	YLR443W
YKR060W	YJL181W		YML094W		YGR005C	YJL127C	YKR085C	YKR030W	YNL332W	YGR075C	YGR220C	YJL103C	YLR446W
YKR062W	YJL183W		YML098W		YGR007W	YJL143W	YKR087C	YKR041W	YNL333W	YGR076C	YGR223C	YJL104W	YLR452C
YKR067W	YJL184W		YML102W		YGR013W	YJL144W	YKR091W	YKR043C	YNL336W	YGR078C	YGR224W	YJL106W	YLR457C
YKR077W	YJL185C		YML107C		YGR015C	YJL145W	YKR092C	YKR044W	YNR003C	YGR079W	YGR225W	YJL107C	YLR459W
YKR078W	YJL186W		YML109W		YGR016W	YJL146W	YKR097W	YKR049C	YNR007C	YGR084C	YGR226C	YJL110C	YML007C-A
YKR080W	YJL191W		YML111W		YGR017W	YJL147C	YKR104W	YKR055W	YNR015W	YGR086C	YGR227W	YJL111W	YML009C
YKR084C	YJL193W		YML116W		YGR020C	YJL156C	YLL004W	YKR056W	YNR020C	YGR088W	YGR230W	YJL112W	YML014W
YKR085C	YJL194W		YML120C		YGR021W	YJL160C	YLL006W-A	YKR058W	YNR024W	YGR089W	YGR233C	YJL115W	YML018C
YKR087C	YJL196C		YML121W		YGR026W	YJL165C	YLL007C	YKR060W	YNR029C	YGR093W	YGR234W	YJL117W	YML021C
YKR097W	YJL203W		YML125C		YGR028W	YJL167W	YLL009C	YKR062W	YNR037C	YGR095C	YGR236C	YJL118W	YML022W
YKR098C	YJL204C		YMR001C-A		YGR030C	YJL173C	YLL010C	YKR064W	YNR039C	YGR096W	YGR244C	YJL121C	YML027W
YKR104W	YJL208C		YMR004W		YGR031W	YJL177W	YLL018C	YKR070W	YNR054C	YGR099W	YGR246C	YJL123C	YML038C
YLL001W	YJL209W		YMR013W-A		YGR033C	YJL178C	YLL019C	YKR074W	YNR059W	YGR101W	YGR247W	YJL125C	YML050W
YLL004W	YJL210W		YMR017W		YGR034W	YJL179W	YLL035W	YKR077W	YNR061C	YGR104C	YGR252W	YJL127C	YML076C
YLL007C	YJL213W		YMR018W		YGR035C	YJL183W	YLL036C	YKR078W	YNR063W	YGR109C	YGR253C	YJL131C	YML094W
YLL009C	YJR003C		YMR030W		YGR035W-A	YJL184W	YLL038C	YKR082W	YNR064C	YGR113W	YGR254W	YJL132W	YML098W
YLL025W	YJR004C		YMR031C		YGR036C	YJL186W	YLL042C	YKR083C	YNR066C	YGR121W-A	YGR257C	YJL133W	YML101C
YLL029W	YJR005W		YMR032W		YGR037C	YJL192C	YLL051C	YKR089C	YNR074C	YGR125W	YGR261C	YJL137C	YML102W
YLL033W	YJR009C		YMR034C		YGR038W	YJL193W	YLL052C	YKR102W	YOL022C	YGR126W	YGR262C	YJL139C	YML109W
YLL041C	YJR015W		YMR037C		YGR040W	YJL194W	YLL053C	YKR104W	YOL023W	YGR127W	YGR263C	YJL141C	YML111W
YLL042C	YJR024C		YMR048W		YGR041W	YJL196C	YLL056C	YLL004W	YOL032W	YGR129W	YGR264C	YJL147C	YML115C
YLL043W	YJR025C		YMR061W		YGR042W	YJL200C	YLL060C	YLL005C	YOL044W	YGR130C	YGR267C	YJL154C	YML116W
YLL051C	YJR039W		YMR069W		YGR045C	YJL201W	YLL063C	YLL006W	YOL048C	YGR131W	YGR268C	YJL160C	YML119W
YLL060C	YJR041C		YMR070W		YGR047C	YJL203W	YLR006C	YLL006W-A	YOL056W	YGR132C	YGR273C	YJL165C	YMR001C-A
YLL062C	YJR048W		YMR079W		YGR048W	YJL204C	YLR009W	YLL007C	YOL071W	YGR133W	YGR279C	YJL166W	YMR005W
YLR001C	YJR049C		YMR084W		YGR049W	YJL210W	YLR010C	YLL009C	YOL077W-A	YGR135W	YGR282C	YJL178C	YMR013W-A
YLR003C	YJR052W		YMR085W		YGR055W	YJL213W	YLR011W	YLL014W	YOL080C	YGR136W	YGR283C	YJL183W	YMR016C
YLR006C	YJR054W		YMR090W		YGR057C	YJL217W	YLR015W	YLL027W	YOL091W	YGR138C	YGR285C	YJL184W	YMR018W
YLR010C	YJR055W		YMR092C		YGR060W	YJR003C	YLR018C	YLL029W	YOL095C	YGR140W	YGR288W	YJL185C	YMR023C
YLR011W	YJR056C		YMR094W		YGR062C	YJR005W	YLR020C	YLL051C	YOL096C	YGR143W	YGR295C	YJL191W	YMR030W
YLR013W	YJR057W		YMR102C		YGR063C	YJR007W	YLR022C	YLL052C	YOL101C	YGR145W	YHL004W	YJL193W	YMR031C
YLR015W	YJR058C		YMR104C		YGR065C	YJR008W	YLR034C	YLL053C	YOL107W	YGR146C	YHL008C	YJL194W	YMR035W
YLR017W	YJR061W		YMR105W-A		YGR066C	YJR009C	YLR035C	YLL056C	YOL110W	YGR146C-A	YHL009C	YJL196C	YMR060C
YLR018C	YJR063W		YMR107W		YGR067C	YJR013W	YLR043C	YLL060C	YOL111C	YGR148C	YHL010C	YJL200C	YMR061W
YLR021W	YJR073C		YMR110C		YGR068C	YJR024C	YLR044C	YLL062C	YOL125W	YGR149W	YHL011C	YJL204C	YMR065W
YLR022C	YJR074W		YMR112C		YGR072W	YJR032W	YLR048W	YLL063C	YOL129W	YGR150C	YHL013C	YJL208C	YMR067C
YLR033W	YJR075W		YMR120C		YGR075C	YJR033C	YLR051C	YLR001C	YOL132W	YGR152C	YHL014C	YJL209W	YMR070W
YLR035C	YJR078W		YMR121C		YGR076C	YJR034W	YLR056W	YLR009W	YOL135C	YGR153W	YHL019C	YJL213W	YMR083W
YLR038C	YJR080C		YMR128W		YGR078C	YJR043C	YLR060W	YLR010C	YOL137W	YGR154C	YHL022C	YJR003C	YMR084W
YLR043C	YJR082C		YMR130W		YGR079W	YJR048W	YLR063W	YLR011W	YOL140W	YGR155W	YHL027W	YJR004C	YMR085W
YLR048W	YJR083C		YMR132C		YGR080W	YJR049C	YLR064W	YLR012C	YOL143C	YGR158C	YHL031C	YJR009C	YMR088C
YLR049C	YJR085C		YMR134W		YGR084C	YJR054W	YLR070C	YLR014C	YOL147C	YGR165W	YHL033C	YJR013W	YMR090W
YLR051C	YJR091C		YMR135C		YGR088W	YJR055W	YLR082C	YLR015W	YOL151W	YGR166W	YHL039W	YJR022W	YMR099C
YLR052W	YJR095W		YMR139W		YGR089W	YJR056C	YLR085C	YLR016C	YOL152W	YGR167W	YHL040C	YJR025C	YMR120C
YLR065C	YJR096W		YMR144W		YGR093W	YJR057W	YLR088W	YLR018C	YOL159C-A	YGR168C	YHL043W	YJR032W	YMR121C
YLR069C	YJR099W		YMR147W		YGR099W	YJR058C	YLR091W	YLR020C	YOL163W	YGR171C	YHL047C	YJR034W	YMR123W
YLR070C	YJR104C		YMR148W		YGR100W	YJR060W	YLR093C	YLR021W	YOL164W	YGR173W	YHR006W	YJR039W	YMR132C
YLR073C	YJR106W		YMR155W		YGR101W	YJR063W	YLR094C	YLR022C	YOR004W	YGR175C	YHR007C	YJR041C	YMR137C
YLR082C	YJR110W		YMR158W		YGR102C	YJR067C	YLR098C	YLR025W	YOR005C	YGR177C	YHR007C-A	YJR048W	YMR140W
YLR085C	YJR115W		YMR160W		YGR103W	YJR068W	YLR102C	YLR038C	YOR006C	YGR180C	YHR008C	YJR049C	YMR144W
YLR088W	YJR118C		YMR171C		YGR104C	YJR069C	YLR103C	YLR043C	YOR008C-A	YGR183C	YHR009C	YJR050W	YMR147W
YLR094C	YJR122W		YMR174C		YGR105W	YJR074W	YLR104W	YLR049C	YOR010C	YGR187C	YHR011W	YJR054W	YMR148W
YLR100W	YJR124C		YMR178W		YGR108W	YJR077C	YLR105C	YLR052W	YOR012W	YGR188C	YHR012W	YJR055W	YMR154C
YLR102C	YJR125C		YMR181C		YGR109C	YJR078W	YLR113W	YLR053C	YOR016C	YGR189C	YHR014W	YJR056C	YMR155W
YLR104W	YJR133W		YMR182C		YGR112W	YJR082C	YLR114C	YLR054C	YOR020W-A	YGR193C	YHR015W	YJR057W	YMR156C
YLR105C	YJR134C		YMR182W-A		YGR113W	YJR091C	YLR115W	YLR065C	YOR022C	YGR195W	YHR017W	YJR061W	YMR158W
YLR109W	YJR139C		YMR183C		YGR117C	YJR094W-A	YLR118C	YLR066W	YOR025W	YGR196C	YHR018C	YJR067C	YMR166C
YLR113W	YJR141W		YMR185W		YGR118W	YJR096W	YLR128W	YLR069C	YOR030W	YGR199W	YHR021W-A	YJR068W	YMR171C
YLR114C	YJR148W		YMR198W		YGR119C	YJR099W	YLR130C	YLR073C	YOR035C	YGR200C	YHR022C-A	YJR069C	YMR174C
YLR115W	YJR152W		YMR200W		YGR120C	YJR100C	YLR137W	YLR078C	YOR038C	YGR204C-A	YHR024C	YJR073C	YMR178W
YLR116W	YJR153W		YMR208W		YGR121C	YJR101W	YLR141W	YLR079W	YOR039W	YGR205W	YHR025W	YJR075W	YMR181C
YLR117C	YKL004W		YMR211W		YGR121W-A	YJR103W	YLR142W	YLR082C	YOR045W	YGR206W	YHR026W	YJR077C	YMR182C
YLR118C	YKL008C		YMR213W		YGR124W	YJR106W	YLR146C	YLR084C	YOR061W	YGR207C	YHR028C	YJR082C	YMR182W-A
YLR119W	YKL009W		YMR214W		YGR126W	YJR115W	YLR147C	YLR085C	YOR062C	YGR208W	YHR029C	YJR083C	YMR193W
YLR126C	YKL013C		YMR217W		YGR127W	YJR116W	YLR151C	YLR086W	YOR068C	YGR209C	YHR030C	YJR091C	YMR194C-B
YLR128W	YKL015W		YMR220W		YGR129W	YJR117W	YLR152C	YLR088W	YOR070C	YGR210C	YHR031C	YJR094C	YMR197C
YLR133W	YKL021C		YMR224C		YGR130C	YJR118C	YLR154C	YLR093C	YOR074C	YGR211W	YHR032W	YJR096W	YMR200W
YLR135W	YKL022C		YMR232W		YGR131W	YJR129C	YLR163C	YLR098C	YOR075W	YGR212W	YHR034C	YJR097W	YMR208W
YLR137W	YKL024C		YMR236W		YGR132C	YJR130C	YLR165C	YLR099W-A	YOR081C	YGR215W	YHR035W	YJR099W	YMR209C
YLR142W	YKL025C		YMR243C		YGR135W	YJR142W	YLR168C	YLR100W	YOR084W	YGR216C	YHR037W	YJR100C	YMR213W
YLR145W	YKL027W		YMR247W-A		YGR136W	YJR147W	YLR170C	YLR102C	YOR094W	YGR220C	YHR038W	YJR101W	YMR214W
YLR146C	YKL037W		YMR250W		YGR138C	YJR153W	YLR173W	YLR104W	YOR099W	YGR223C	YHR039C	YJR102C	YMR217W
YLR147C	YKL040C		YMR251W-A		YGR143W	YJR154W	YLR174W	YLR105C	YOR101W	YGR224W	YHR045W	YJR104C	YMR221C
YLR151C	YKL041W		YMR257C		YGR145W	YKL001C	YLR179C	YLR109W	YOR103C	YGR225W	YHR046C	YJR106W	YMR224C
YLR172C	YKL043W		YMR260C		YGR146C	YKL004W	YLR180W	YLR114C	YOR104W	YGR226C	YHR048W	YJR109C	YMR226C
YLR180W	YKL046C		YMR261C		YGR146C-A	YKL007W	YLR188W	YLR115W	YOR106W	YGR227W	YHR049W	YJR110W	YMR227C
YLR182W	YKL049C		YMR264W		YGR148C	YKL008C	YLR192C	YLR117C	YOR110W	YGR231C	YHR050W	YJR115W	YMR234W
YLR186W	YKL051W		YMR267W		YGR149W	YKL011C	YLR196W	YLR118C	YOR122C	YGR232W	YHR051W	YJR116W	YMR236W
YLR192C	YKL053C-A		YMR268C		YGR152C	YKL016C	YLR203C	YLR120C	YOR126C	YGR233C	YHR058C	YJR120W	YMR243C
YLR200W	YKL055C		YMR269W		YGR153W	YKL021C	YLR207W	YLR128W	YOR127W	YGR236C	YHR064C	YJR122W	YMR247C
YLR201C	YKL064W		YMR270C		YGR155W	YKL023W	YLR208W	YLR129W	YOR128C	YGR237C	YHR065C	YJR124C	YMR247W-A
YLR207W	YKL065C		YMR272C		YGR158C	YKL025C	YLR212C	YLR130C	YOR130C	YGR238C	YHR066W	YJR125C	YMR250W
YLR208W	YKL072W		YMR272W-B		YGR165W	YKL026C	YLR216C	YLR132C	YOR137C	YGR240C	YHR067W	YJR129C	YMR257C
YLR211C	YKL078W		YMR273C		YGR166W	YKL027W	YLR218C	YLR135W	YOR143C	YGR244C	YHR070W	YJR133W	YMR260C
YLR212C	YKL082C		YMR274C		YGR167W	YKL037W	YLR220W	YLR137W	YOR145C	YGR246C	YHR071W	YJR134C	YMR261C
YLR214W	YKL084W		YMR278W		YGR169C	YKL039W	YLR224W	YLR141W	YOR150W	YGR247W	YHR075C	YJR135C	YMR272W-B
YLR216C	YKL087C		YMR279C		YGR170W	YKL040C	YLR225C	YLR143W	YOR157C	YGR249W	YHR076W	YJR139C	YMR278W
YLR218C	YKL089W		YMR286W		YGR171C	YKL043W	YLR226W	YLR144C	YOR159C	YGR252W	YHR077C	YJR141W	YMR284W
YLR220W	YKL090W		YMR292W		YGR173W	YKL047W	YLR234W	YLR146C	YOR163W	YGR253C	YHR087W	YJR142W	YMR285C
YLR222C	YKL091C		YMR296C		YGR174C	YKL048C	YLR238W	YLR147C	YOR174W	YGR254W	YHR088W	YJR154W	YMR286W
YLR224W	YKL096W		YMR297W		YGR174W-A	YKL051W	YLR242C	YLR151C	YOR179C	YGR255C	YHR090C	YKL002W	YMR289W
YLR227C	YKL098W		YMR299C		YGR175C	YKL055C	YLR251W	YLR152C	YOR180C	YGR256W	YHR092C	YKL003C	YMR293C
YLR239C	YKL104C		YMR300C		YGR177C	YKL058W	YLR253W	YLR163C	YOR186W	YGR257C	YHR097C	YKL004W	YMR294W
YLR242C	YKL107W		YMR305C		YGR180C	YKL061W	YLR265C	YLR164W	YOR195W	YGR260W	YHR100C	YKL007W	YMR296C
YLR243W	YKL108W		YMR309C		YGR181W	YKL063C	YLR267W	YLR165C	YOR196C	YGR261C	YHR101C	YKL008C	YMR298W
YLR246W	YKL110C		YMR310C		YGR187C	YKL067W	YLR270W	YLR172C	YOR201C	YGR262C	YHR107C	YKL013C	YMR299C
YLR248W	YKL112W		YMR311C		YGR189C	YKL071W	YLR284C	YLR173W	YOR202W	YGR263C	YHR109W	YKL015W	YMR311C
YLR253W	YKL113C		YMR312W		YGR192C	YKL075C	YLR286C	YLR180W	YOR208W	YGR264C	YHR110W	YKL016C	YMR312W
YLR260W	YKL116C		YMR314W		YGR193C	YKL080W	YLR287C	YLR186W	YOR209C	YGR267C	YHR111W	YKL021C	YMR313C
YLR262C-A	YKL117W		YMR315W		YGR196C	YKL086W	YLR287C-A	YLR188W	YOR210W	YGR268C	YHR112C	YKL023W	YMR314W
YLR263W	YKL119C		YMR322C		YGR199W	YKL088W	YLR291C	YLR192C	YOR212W	YGR271C-A	YHR114W	YKL024C	YMR315W-A
YLR267W	YKL124W		YNL002C		YGR200C	YKL090W	YLR292C	YLR195C	YOR213C	YGR277C	YHR115C	YKL025C	YMR322C
YLR270W	YKL126W		YNL011C		YGR202C	YKL095W	YLR295C	YLR199C	YOR220W	YGR282C	YHR118C	YKL027W	YNL002C
YLR271W	YKL130C		YNL036W		YGR204C-A	YKL096W	YLR298C	YLR200W	YOR224C	YGR283C	YHR120W	YKL037W	YNL003C
YLR283W	YKL132C		YNL039W		YGR206W	YKL096W-A	YLR299W	YLR201C	YOR232W	YGR285C	YHR121W	YKL040C	YNL004W
YLR284C	YKL137W		YNL044W		YGR207C	YKL104C	YLR306W	YLR203C	YOR236W	YGR286C	YHR123W	YKL043W	YNL005C
YLR286C	YKL139W		YNL046W		YGR208W	YKL108W	YLR307W	YLR207W	YOR241W	YGR288W	YHR127W	YKL047W	YNL006W
YLR287C	YKL140W		YNL047C		YGR209C	YKL110C	YLR312C	YLR208W	YOR242C	YGR295C	YHR129C	YKL053C-A	YNL009W
YLR288C	YKL149C		YNL052W		YGR210C	YKL112W	YLR313C	YLR210W	YOR243C	YHL004W	YHR131C	YKL063C	YNL010W
YLR297W	YKL150W		YNL053W		YGR211W	YKL113C	YLR314C	YLR211C	YOR250C	YHL007C	YHR132C	YKL064W	YNL015W
YLR298C	YKL155C		YNL058C		YGR212W	YKL116C	YLR316C	YLR214W	YOR253W	YHL009C	YHR132W-A	YKL067W	YNL022C
YLR299W	YKL156W		YNL059C		YGR215W	YKL120W	YLR321C	YLR215C	YOR260W	YHL010C	YHR133C	YKL069W	YNL024C
YLR307W	YKL159C		YNL062C		YGR216C	YKL126W	YLR323C	YLR216C	YOR262W	YHL011C	YHR134W	YKL070W	YNL029C
YLR312C	YKL161C		YNL070W		YGR220C	YKL127W	YLR324W	YLR218C	YOR268C	YHL013C	YHR136C	YKL071W	YNL032W
YLR313C	YKL167C		YNL074C		YGR222W	YKL130C	YLR325C	YLR228C	YOR269W	YHL014C	YHR138C	YKL074C	YNL035C
YLR314C	YKL172W		YNL077W		YGR223C	YKL132C	YLR326W	YLR229C	YOR280C	YHL015W-A	YHR140W	YKL080W	YNL039W
YLR319C	YKL173W		YNL082W		YGR224W	YKL138C	YLR327C	YLR234W	YOR283W	YHL019C	YHR143W	YKL086W	YNL040W
YLR326W	YKL179C		YNL084C		YGR226C	YKL139W	YLR328W	YLR238W	YOR285W	YHL027W	YHR143W-A	YKL087C	YNL041C
YLR328W	YKL184W		YNL090W		YGR227W	YKL140W	YLR329W	YLR239C	YOR286W	YHL031C	YHR148W	YKL088W	YNL042W-B
YLR329W	YKL185W		YNL093W		YGR229C	YKL141W	YLR341W	YLR246W	YOR288C	YHL039W	YHR153C	YKL089W	YNL046W
YLR332W	YKL187C		YNL097C		YGR230W	YKL142W	YLR343W	YLR253W	YOR293C-A	YHL040C	YHR156C	YKL090W	YNL047C
YLR343W	YKL189W		YNL104C		YGR231C	YKL143W	YLR345W	YLR254C	YOR297C	YHL042W	YHR157W	YKL093W	YNL050C
YLR345W	YKL191W		YNL118C		YGR232W	YKL144C	YLR346C	YLR262C	YOR304W	YHL043W	YHR160C	YKL094W	YNL052W
YLR352W	YKL192C		YNL122C		YGR233C	YKL154W	YLR352W	YLR263W	YOR306C	YHL047C	YHR162W	YKL095W	YNL080C
YLR354C	YKL194C		YNL124W		YGR234W	YKL155C	YLR354C	YLR264C-A	YOR316C	YHR001W-A	YHR163W	YKL096W	YNL082W
YLR356W	YKL195W		YNL126W		YGR236C	YKL156W	YLR355C	YLR265C	YOR316C-A	YHR004C	YHR167W	YKL098W	YNL085W
YLR360W	YKL205W		YNL127W		YGR237C	YKL157W	YLR356W	YLR266C	YOR327C	YHR006W	YHR168W	YKL099C	YNL090W
YLR361C	YKL208W		YNL128W		YGR238C	YKL159C	YLR360W	YLR267W	YOR339C	YHR007C-A	YHR170W	YKL103C	YNL093W
YLR363W-A	YKL216W		YNL129W		YGR243W	YKL161C	YLR361C	YLR268W	YOR347C	YHR008C	YHR171W	YKL104C	YNL107W
YLR364W	YKL220C		YNL130C-A		YGR244C	YKL162C	YLR363W-A	YLR271W	YOR354C	YHR011W	YHR175W-A	YKL107W	YNL111C
YLR367W	YKL221W		YNL131W		YGR246C	YKL167C	YLR364W	YLR273C	YOR362C	YHR012W	YHR176W	YKL108W	YNL113W
YLR369W	YKR003W		YNL132W		YGR252W	YKL170W	YLR367W	YLR283W	YOR367W	YHR013C	YHR177W	YKL112W	YNL118C
YLR372W	YKR004C		YNL133C		YGR253C	YKL172W	YLR369W	YLR284C	YOR368W	YHR015W	YHR181W	YKL113C	YNL124W
YLR380W	YKR005C		YNL135C		YGR254W	YKL173W	YLR380W	YLR285C-A	YOR370C	YHR017W	YHR182W	YKL116C	YNL130C-A
YLR387C	YKR007W		YNL137C		YGR255C	YKL179C	YLR385C	YLR286C	YOR375C	YHR018C	YHR183W	YKL122C	YNL131W
YLR388W	YKR008W		YNL138W		YGR257C	YKL181W	YLR388W	YLR287C	YOR376W-A	YHR022C	YHR187W	YKL126W	YNL133C
YLR392C	YKR009C		YNL144C		YGR260W	YKL185W	YLR389C	YLR288C	YOR378W	YHR022C-A	YHR191C	YKL127W	YNL138W
YLR397C	YKR011C		YNL145W		YGR262C	YKL186C	YLR390W-A	YLR289W	YOR381W	YHR025W	YHR192W	YKL130C	YNL141W
YLR399C	YKR013W		YNL146C-A		YGR263C	YKL187C	YLR394W	YLR292C	YOR382W	YHR026W	YHR199C	YKL132C	YNL146W
YLR412C-A	YKR016W		YNL146W		YGR264C	YKL189W	YLR397C	YLR297W	YOR385W	YHR028C	YHR199C-A	YKL137W	YNL149C
YLR414C	YKR021W		YNL149C		YGR267C	YKL194C	YLR405W	YLR299W	YOR386W	YHR030C	YHR206W	YKL140W	YNL151C
YLR417W	YKR024C		YNL152W		YGR268C	YKL195W	YLR412C-A	YLR312C	YPL011C	YHR031C	YHR210C	YKL143W	YNL153C
YLR424W	YKR026C		YNL153C		YGR271C-A	YKL205W	YLR413W	YLR313C	YPL027W	YHR032W	YIL004C	YKL144C	YNL155W
YLR427W	YKR029C		YNL155W		YGR273C	YKL211C	YLR414C	YLR314C	YPL041C	YHR033W	YIL005W	YKL149C	YNL156C
YLR435W	YKR030W		YNL156C		YGR279C	YKL214C	YLR423C	YLR315W	YPL047W	YHR034C	YIL006W	YKL154W	YNL161W
YLR438C-A	YKR035W-A		YNL157W		YGR282C	YKL221W	YLR424W	YLR319C	YPL052W	YHR037W	YIL009C-A	YKL155C	YNL168C
YLR438W	YKR037C		YNL162W-A		YGR283C	YKR003W	YLR426W	YLR324W	YPL054W	YHR042W	YIL009W	YKL156W	YNL181W
YLR439W	YKR038C		YNL163C		YGR285C	YKR004C	YLR427W	YLR325C	YPL071C	YHR045W	YIL014W	YKL159C	YNL182C
YLR442C	YKR039W		YNL182C		YGR288W	YKR007W	YLR431C	YLR327C	YPL072W	YHR046C	YIL016W	YKL161C	YNL192W
YLR443W	YKR043C		YNL183C		YGR295C	YKR008W	YLR438W	YLR328W	YPL074W	YHR048W	YIL020C	YKL162C	YNL194C
YLR445W	YKR044W		YNL190W		YHL004W	YKR009C	YLR439W	YLR329W	YPL077C	YHR049W	YIL022W	YKL165C	YNL199C
YLR453C	YKR045C		YNL191W		YHL008C	YKR010C	YLR447C	YLR336C	YPL092W	YHR051W	YIL023C	YKL167C	YNL201C
YLR455W	YKR046C		YNL204C		YHL009C	YKR024C	YLR452C	YLR341W	YPL096C-A	YHR058C	YIL029C	YKL172W	YNL204C
YLR457C	YKR051W		YNL206C		YHL010C	YKR026C	YLR453C	YLR343W	YPL098C	YHR059W	YIL031W	YKL173W	YNL206C
YLR459W	YKR055W		YNL211C		YHL011C	YKR029C	YLR459W	YLR345W	YPL099C	YHR061C	YIL034C	YKL174C	YNL210W
YML007C-A	YKR056W		YNL215W		YHL013C	YKR030W	YML009C	YLR346C	YPL100W	YHR064C	YIL035C	YKL181W	YNL211C
YML009C	YKR057W		YNL217W		YHL014C	YKR036C	YML014W	YLR352W	YPL101W	YHR066W	YIL038C	YKL184W	YNL215W
YML017W	YKR058W		YNL218W		YHL019C	YKR037C	YML018C	YLR353W	YPL108W	YHR067W	YIL040W	YKL185W	YNL216W
YML018C	YKR062W		YNL220W		YHL022C	YKR038C	YML019W	YLR361C-A	YPL109C	YHR070W	YIL044C	YKL186C	YNL221C
YML019W	YKR064W		YNL232W		YHL027W	YKR039W	YML020W	YLR363W-A	YPL111W	YHR071W	YIL050W	YKL190W	YNL223W
YML021C	YKR066C		YNL240C		YHL031C	YKR041W	YML021C	YLR364W	YPL121C	YHR072W-A	YIL053W	YKL191W	YNL230C
YML023C	YKR067W		YNL248C		YHL032C	YKR045C	YML025C	YLR369W	YPL123C	YHR073W	YIL055C	YKL192C	YNL232W
YML025C	YKR070W		YNL256W		YHL033C	YKR051W	YML027W	YLR372W	YPL130W	YHR074W	YIL057C	YKL195W	YNL236W
YML027W	YKR075C		YNL263C		YHL039W	YKR052C	YML029W	YLR373C	YPL134C	YHR075C	YIL061C	YKL204W	YNL238W
YML029W	YKR076W		YNL265C		YHL040C	YKR055W	YML030W	YLR375W	YPL139C	YHR076W	YIL064W	YKL205W	YNL240C
YML038C	YKR077W		YNL272C		YHL042W	YKR056W	YML047C	YLR380W	YPL148C	YHR081W	YIL067C	YKL208W	YNL252C
YML041C	YKR078W		YNL275W		YHL043W	YKR058W	YML050W	YLR385C	YPL152W-A	YHR082C	YIL069C	YKL214C	YNL260C
YML050W	YKR080W		YNL277W		YHL047C	YKR061W	YML053C	YLR389C	YPL159C	YHR083W	YIL070C	YKL215C	YNL261W
YML058W-A	YKR082W		YNL277W-A		YHR001W-A	YKR062W	YML064C	YLR390W	YPL168W	YHR084W	YIL072W	YKL216W	YNL263C
YML062C	YKR084C		YNL280C		YHR004C	YKR066C	YML071C	YLR392C	YPL172C	YHR086W-A	YIL074C	YKL221W	YNL265C
YML064C	YKR085C		YNL284C		YHR006W	YKR067W	YML074C	YLR394W	YPL173W	YHR087W	YIL075C	YKR003W	YNL269W
YML066C	YKR089C		YNL288W		YHR007C	YKR070W	YML086C	YLR404W	YPL174C	YHR088W	YIL079C	YKR004C	YNL272C
YML070W	YKR098C		YNL290W		YHR007C-A	YKR075C	YML087C	YLR405W	YPL181W	YHR090C	YIL083C	YKR005C	YNL277W
YML071C	YKR101W		YNL293W		YHR008C	YKR076W	YML102W	YLR409C	YPL183C	YHR091C	YIL085C	YKR007W	YNL277W-A
YML074C	YLL006W		YNL306W		YHR009C	YKR078W	YML107C	YLR412C-A	YPL187W	YHR092C	YIL087C	YKR008W	YNL280C
YML079W	YLL006W-A		YNL307C		YHR010W	YKR080W	YML111W	YLR417W	YPL189C-A	YHR100C	YIL088C	YKR009C	YNL288W
YML081C-A	YLL009C		YNL309W		YHR011W	YKR084C	YML112W	YLR419W	YPL189W	YHR101C	YIL090W	YKR016W	YNL290W
YML081W	YLL010C		YNL314W		YHR012W	YKR087C	YML115C	YLR420W	YPL193W	YHR107C	YIL091C	YKR024C	YNL291C
YML088W	YLL019C		YNL316C		YHR013C	YKR089C	YML120C	YLR423C	YPL201C	YHR109W	YIL093C	YKR029C	YNL308C
YML101C	YLL025W		YNL326C		YHR014W	YKR097W	YML125C	YLR424W	YPL202C	YHR110W	YIL096C	YKR035W-A	YNL312W
YML107C	YLL029W		YNL332W		YHR015W	YKR102W	YML126C	YLR426W	YPL206C	YHR111W	YIL097W	YKR036C	YNL314W
YML110C	YLL032C		YNR001C		YHR017W	YLL001W	YML130C	YLR427W	YPL207W	YHR112C	YIL098C	YKR037C	YNL316C
YML115C	YLL033W		YNR002C		YHR018C	YLL005C	YMR016C	YLR431C	YPL209C	YHR113W	YIL101C	YKR041W	YNL325C
YML119W	YLL035W		YNR014W		YHR022C	YLL006W	YMR018W	YLR435W	YPL213W	YHR114W	YIL102C	YKR043C	YNL330C
YML120C	YLL036C		YNR020C		YHR022C-A	YLL006W-A	YMR020W	YLR438C-A	YPL214C	YHR118C	YIL108W	YKR044W	YNL332W
YML130C	YLL039C		YNR024W		YHR025W	YLL007C	YMR026C	YLR442C	YPL220W	YHR120W	YIL111W	YKR046C	YNL335W
YMR001C-A	YLL043W		YNR030W		YHR026W	YLL010C	YMR029C	YLR445W	YPL236C	YHR122W	YIL113W	YKR049C	YNL336W
YMR004W	YLL046C		YNR031C		YHR028C	YLL013C	YMR032W	YLR446W	YPL243W	YHR123W	YIL120W	YKR051W	YNR008W
YMR005W	YLL051C		YNR032C-A		YHR029C	YLL014W	YMR034C	YLR447C	YPL245W	YHR127W	YIL121W	YKR052C	YNR014W
YMR013W-A	YLL052C		YNR035C		YHR030C	YLL018C	YMR035W	YLR452C	YPL257W	YHR133C	YIL123W	YKR055W	YNR018W
YMR015C	YLL056C		YNR040W		YHR031C	YLL019C	YMR036C	YLR453C	YPL264C	YHR134W	YIL127C	YKR057W	YNR027W
YMR017W	YLL060C		YNR054C		YHR033W	YLL027W	YMR037C	YLR457C	YPL267W	YHR135C	YIL128W	YKR058W	YNR030W
YMR023C	YLR003C		YNR059W		YHR034C	YLL032C	YMR040W	YLR461W	YPL272C	YHR138C	YIL132C	YKR060W	YNR031C
YMR026C	YLR010C		YNR061C		YHR035W	YLL036C	YMR048W	YML007C-A	YPL277C	YHR139C	YIL134W	YKR062W	YNR034W
YMR029C	YLR011W		YNR063W		YHR037W	YLL039C	YMR052W	YML009C	YPR003C	YHR140W	YIL138C	YKR067W	YNR037C
YMR032W	YLR012C		YNR068C		YHR039C	YLL046C	YMR060C	YML014W	YPR005C	YHR143W	YIL142W	YKR074W	YNR040W
YMR037C	YLR016C		YNR074C		YHR045W	YLL051C	YMR070W	YML017W	YPR007C	YHR143W-A	YIL144W	YKR075C	YNR043W
YMR048W	YLR020C		YNR075W		YHR046C	YLL052C	YMR073C	YML018C	YPR009W	YHR151C	YIL145C	YKR076W	YNR051C
YMR052W	YLR022C		YOL003C		YHR048W	YLL053C	YMR087W	YML019W	YPR013C	YHR154W	YIL147C	YKR077W	YNR057C
YMR056C	YLR025W		YOL009C		YHR049W	YLL062C	YMR088C	YML020W	YPR017C	YHR156C	YIL152W	YKR082W	YNR060W
YMR060C	YLR027C		YOL011W		YHR050W	YLR010C	YMR089C	YML022W	YPR020W	YHR159W	YIL154C	YKR083C	YNR062C
YMR061W	YLR033W		YOL012C		YHR051W	YLR013W	YMR092C	YML029W	YPR021C	YHR160C	YIL155C	YKR084C	YNR064C
YMR065W	YLR035C		YOL013C		YHR058C	YLR014C	YMR093W	YML030W	YPR051W	YHR162W	YIL157C	YKR085C	YNR068C
YMR067C	YLR038C		YOL014W		YHR059W	YLR015W	YMR094W	YML034W	YPR057W	YHR163W	YIL161W	YKR092C	YNR074C
YMR070W	YLR040C		YOL016C		YHR061C	YLR016C	YMR099C	YML041C	YPR061C	YHR167W	YIL164C	YKR098C	YNR075W
YMR073C	YLR042C		YOL023W		YHR064C	YLR018C	YMR101C	YML042W	YPR067W	YHR168W	YIR001C	YKR102W	YOL002C
YMR079W	YLR047C		YOL032W		YHR065C	YLR020C	YMR104C	YML043C	YPR070W	YHR171W	YIR003W	YLL001W	YOL005C
YMR083W	YLR048W		YOL033W		YHR067W	YLR021W	YMR106C	YML047C	YPR086W	YHR175W-A	YIR004W	YLL005C	YOL009C
YMR084W	YLR049C		YOL038W		YHR070W	YLR022C	YMR108W	YML049C	YPR094W	YHR176W	YIR005W	YLL006W	YOL013W-A
YMR086W	YLR051C		YOL043C		YHR071W	YLR025W	YMR110C	YML050W	YPR100W	YHR177W	YIR010W	YLL007C	YOL014W
YMR087W	YLR052W		YOL048C		YHR072W-A	YLR034C	YMR112C	YML054C-A	YPR101W	YHR181W	YIR012W	YLL009C	YOL021C
YMR088C	YLR053C		YOL056W		YHR074W	YLR038C	YMR120C	YML065W	YPR106W	YHR182W	YIR013C	YLL013C	YOL022C
YMR089C	YLR065C		YOL057W		YHR075C	YLR042C	YMR121C	YML066C	YPR107C	YHR183W	YIR016W	YLL019C	YOL025W
YMR090W	YLR069C		YOL068C		YHR076W	YLR043C	YMR123W	YML071C	YPR108W-A	YHR187W	YIR017C	YLL025W	YOL026C
YMR091C	YLR070C		YOL069W		YHR077C	YLR044C	YMR130W	YML087C	YPR122W	YHR189W	YIR018W	YLL026W	YOL031C
YMR092C	YLR071C		YOL072W		YHR081W	YLR047C	YMR133W	YML088W	YPR138C	YHR190W	YIR021W	YLL029W	YOL032W
YMR093W	YLR078C		YOL073C		YHR083W	YLR048W	YMR135C	YML098W	YPR139C	YHR191C	YIR022W	YLL032C	YOL033W
YMR096W	YLR082C		YOL080C		YHR086W-A	YLR049C	YMR137C	YML101C	YPR158W	YHR192W	YIR024C	YLL033W	YOL038W
YMR098C	YLR083C		YOL082W		YHR090C	YLR051C	YMR139W	YML110C	YPR159C-A	YHR197W	YIR025W	YLL035W	YOL041C
YMR101C	YLR085C		YOL086W-A		YHR091C	YLR052W	YMR140W	YML111W	YPR166C	YHR198C	YIR026C	YLL041C	YOL043C
YMR102C	YLR088W		YOL088C		YHR092C	YLR053C	YMR154C	YML115C	YPR167C	YHR199C-A	YIR027C	YLL042C	YOL065C
YMR104C	YLR091W		YOL089C		YHR101C	YLR056W	YMR155W	YML116W	YPR168W	YHR205W	YIR030C	YLL046C	YOL066C
YMR105C	YLR093C		YOL091W		YHR107C	YLR063W	YMR157C	YML119W	YPR175W	YHR206W	YIR034C	YLL051C	YOL072W
YMR106C	YLR096W		YOL092W		YHR109W	YLR065C	YMR158W	YML120C	YPR192W	YHR209W	YIR036C	YLL053C	YOL073C
YMR108W	YLR098C		YOL095C		YHR110W	YLR066W	YMR160W	YMR001C-A	YPR200C	YHR210C	YIR038C	YLL056C	YOL082W
YMR110C	YLR099W-A		YOL096C		YHR111W	YLR067C	YMR166C	YMR004W	YPR201W	YIL003W	YJL002C	YLL062C	YOL089C
YMR120C	YLR102C		YOL097W-A		YHR112C	YLR069C	YMR168C	YMR013W-A		YIL004C	YJL004C	YLL063C	YOL091W
YMR123W	YLR103C		YOL100W		YHR113W	YLR078C	YMR171C	YMR015C		YIL005W	YJL006C	YLR003C	YOL092W
YMR124W	YLR104W		YOL103W		YHR114W	YLR079W	YMR178W	YMR018W		YIL006W	YJL011C	YLR006C	YOL093W
YMR130W	YLR105C		YOL104C		YHR115C	YLR082C	YMR180C	YMR019W		YIL009C-A	YJL013C	YLR009W	YOL096C
YMR133W	YLR109W		YOL108C		YHR117W	YLR084C	YMR183C	YMR020W		YIL009W	YJL019W	YLR010C	YOL097W-A
YMR135C	YLR113W		YOL111C		YHR118C	YLR085C	YMR187C	YMR023C		YIL014W	YJL020C	YLR011W	YOL098C
YMR137C	YLR116W		YOL112W		YHR120W	YLR088W	YMR188C	YMR026C		YIL016W	YJL023C	YLR012C	YOL100W
YMR144W	YLR117C		YOL126C		YHR121W	YLR091W	YMR193W	YMR029C		YIL022W	YJL025W	YLR016C	YOL105C
YMR146C	YLR118C		YOL132W		YHR122W	YLR093C	YMR194C-B	YMR030W		YIL024C	YJL033W	YLR020C	YOL107W
YMR154C	YLR119W		YOL133W		YHR123W	YLR094C	YMR195W	YMR031C		YIL026C	YJL036W	YLR022C	YOL108C
YMR155W	YLR120C		YOL140W		YHR127W	YLR095C	YMR198W	YMR034C		YIL029C	YJL041W	YLR025W	YOL110W
YMR158W	YLR125W		YOL143C		YHR129C	YLR098C	YMR202W	YMR035W		YIL031W	YJL043W	YLR034C	YOL111C
YMR166C	YLR126C		YOL145C		YHR131C	YLR100W	YMR208W	YMR036C		YIL034C	YJL044C	YLR035C	YOL112W
YMR171C	YLR128W		YOL146W		YHR133C	YLR102C	YMR209C	YMR040W		YIL035C	YJL046W	YLR040C	YOL115W
YMR177W	YLR129W		YOL147C		YHR134W	YLR103C	YMR211W	YMR041C		YIL036W	YJL047C	YLR043C	YOL122C
YMR178W	YLR135W		YOL151W		YHR135C	YLR104W	YMR217W	YMR049C		YIL041W	YJL049W	YLR044C	YOL125W
YMR181C	YLR136C		YOL152W		YHR136C	YLR109W	YMR220W	YMR052W		YIL044C	YJL054W	YLR049C	YOL126C
YMR182C	YLR137W		YOL159C		YHR137W	YLR113W	YMR221C	YMR054W		YIL046W	YJL055W	YLR051C	YOL133W
YMR184W	YLR141W		YOL159C-A		YHR138C	YLR114C	YMR224C	YMR056C		YIL046W-A	YJL059W	YLR054C	YOL144W
YMR187C	YLR142W		YOL162W		YHR139C	YLR116W	YMR227C	YMR065W		YIL049W	YJL060W	YLR056W	YOL145C
YMR188C	YLR143W		YOL163W		YHR140W	YLR117C	YMR230W-A	YMR067C		YIL050W	YJL062W-A	YLR060W	YOL147C
YMR193W	YLR144C		YOL164W		YHR143W	YLR118C	YMR233W	YMR069W		YIL051C	YJL063C	YLR063W	YOL152W
YMR208W	YLR145W		YOR004W		YHR143W-A	YLR119W	YMR234W	YMR080C		YIL053W	YJL065C	YLR069C	YOL159C
YMR209C	YLR146C		YOR005C		YHR148W	YLR120C	YMR237W	YMR084W		YIL055C	YJL068C	YLR071C	YOL164W
YMR211W	YLR151C		YOR010C		YHR150W	YLR125W	YMR239C	YMR089C		YIL057C	YJL069C	YLR073C	YOR002W
YMR213W	YLR152C		YOR016C		YHR151C	YLR126C	YMR240C	YMR090W		YIL061C	YJL071W	YLR082C	YOR016C
YMR216C	YLR163C		YOR022C		YHR153C	YLR128W	YMR241W	YMR092C		YIL064W	YJL072C	YLR086W	YOR020W-A
YMR217W	YLR164W		YOR025W		YHR154W	YLR130C	YMR243C	YMR096W		YIL067C	YJL076W	YLR088W	YOR025W
YMR220W	YLR165C		YOR028C		YHR156C	YLR145W	YMR244C-A	YMR098C		YIL069C	YJL077C	YLR091W	YOR026W
YMR226C	YLR166C		YOR033C		YHR157W	YLR147C	YMR244W	YMR099C		YIL070C	YJL078C	YLR094C	YOR028C
YMR230W-A	YLR168C		YOR034C		YHR158C	YLR151C	YMR247W-A	YMR105C		YIL072W	YJL079C	YLR098C	YOR030W
YMR232W	YLR172C		YOR034C-A		YHR159W	YLR152C	YMR250W	YMR106C		YIL074C	YJL081C	YLR099W-A	YOR031W
YMR233W	YLR173W		YOR045W		YHR160C	YLR154C	YMR253C	YMR107W		YIL076W	YJL085W	YLR102C	YOR037W
YMR235C	YLR174W		YOR048C		YHR162W	YLR163C	YMR261C	YMR110C		YIL078W	YJL087C	YLR103C	YOR039W
YMR239C	YLR180W		YOR049C		YHR163W	YLR168C	YMR262W	YMR112C		YIL079C	YJL088W	YLR104W	YOR040W
YMR240C	YLR182W		YOR056C		YHR167W	YLR179C	YMR264W	YMR120C		YIL084C	YJL094C	YLR113W	YOR045W
YMR241W	YLR183C		YOR062C		YHR168W	YLR180W	YMR267W	YMR121C		YIL085C	YJL096W	YLR115W	YOR048C
YMR244C-A	YLR186W		YOR074C		YHR170W	YLR183C	YMR268C	YMR130W		YIL087C	YJL099W	YLR116W	YOR057W
YMR247W-A	YLR187W		YOR075W		YHR171W	YLR188W	YMR276W	YMR134W		YIL088C	YJL100W	YLR117C	YOR060C
YMR253C	YLR189C		YOR078W		YHR175W-A	YLR192C	YMR278W	YMR140W		YIL089W	YJL101C	YLR118C	YOR061W
YMR260C	YLR190W		YOR089C		YHR177W	YLR196W	YMR279C	YMR144W		YIL091C	YJL102W	YLR119W	YOR065W
YMR261C	YLR192C		YOR099W		YHR181W	YLR201C	YMR283C	YMR147W		YIL092W	YJL103C	YLR129W	YOR069W
YMR264W	YLR196W		YOR103C		YHR182W	YLR207W	YMR285C	YMR148W		YIL093C	YJL104W	YLR130C	YOR070C
YMR265C	YLR200W		YOR104W		YHR183W	YLR208W	YMR294W	YMR152W		YIL094C	YJL105W	YLR132C	YOR074C
YMR267W	YLR203C		YOR111W		YHR187W	YLR211C	YMR296C	YMR156C		YIL097W	YJL106W	YLR136C	YOR075W
YMR268C	YLR208W		YOR115C		YHR191C	YLR214W	YMR297W	YMR158W		YIL098C	YJL110C	YLR137W	YOR077W
YMR269W	YLR211C		YOR120W		YHR192W	YLR215C	YMR301C	YMR160W		YIL103W	YJL111W	YLR141W	YOR079C
YMR270C	YLR212C		YOR126C		YHR197W	YLR216C	YMR303C	YMR161W		YIL106W	YJL115W	YLR143W	YOR081C
YMR272C	YLR214W		YOR131C		YHR198C	YLR222C	YMR305C	YMR166C		YIL111W	YJL116C	YLR144C	YOR087W
YMR272W-B	YLR216C		YOR136W		YHR199C	YLR224W	YMR310C	YMR171C		YIL113W	YJL117W	YLR146C	YOR089C
YMR274C	YLR219W		YOR137C		YHR203C	YLR225C	YMR311C	YMR175W		YIL114C	YJL118W	YLR151C	YOR094W
YMR276W	YLR221C		YOR138C		YHR205W	YLR227C	YMR312W	YMR177W		YIL115C	YJL121C	YLR152C	YOR099W
YMR279C	YLR222C		YOR143C		YHR206W	YLR229C	YMR313C	YMR180C		YIL116W	YJL122W	YLR154C	YOR101W
YMR283C	YLR224W		YOR145C		YHR209W	YLR234W	YMR315W	YMR181C		YIL120W	YJL123C	YLR163C	YOR104W
YMR285C	YLR225C		YOR147W		YHR210C	YLR237W	YMR315W-A	YMR182C		YIL121W	YJL125C	YLR165C	YOR106W
YMR286W	YLR226W		YOR148C		YIL003W	YLR238W	YMR322C	YMR184W		YIL122W	YJL127C	YLR168C	YOR107W
YMR289W	YLR228C		YOR150W		YIL004C	YLR239C	YNL002C	YMR185W		YIL123W	YJL128C	YLR172C	YOR110W
YMR290C	YLR233C		YOR155C		YIL005W	YLR240W	YNL003C	YMR198W		YIL124W	YJL131C	YLR173W	YOR127W
YMR292W	YLR239C		YOR156C		YIL008W	YLR243W	YNL004W	YMR202W		YIL127C	YJL132W	YLR179C	YOR130C
YMR294W	YLR240W		YOR159C		YIL009C-A	YLR251W	YNL005C	YMR203W		YIL128W	YJL133W	YLR180W	YOR137C
YMR296C	YLR242C		YOR164C		YIL009W	YLR253W	YNL006W	YMR208W		YIL132C	YJL137C	YLR190W	YOR138C
YMR297W	YLR246W		YOR174W		YIL010W	YLR254C	YNL009W	YMR209C		YIL138C	YJL139C	YLR192C	YOR145C
YMR301C	YLR251W		YOR178C		YIL016W	YLR263W	YNL011C	YMR211W		YIL142W	YJL141C	YLR195C	YOR147W
YMR303C	YLR253W		YOR179C		YIL020C	YLR265C	YNL016W	YMR216C		YIL144W	YJL144W	YLR199C	YOR150W
YMR305C	YLR254C		YOR180C		YIL022W	YLR267W	YNL020C	YMR217W		YIL145C	YJL145W	YLR200W	YOR159C
YMR310C	YLR260W		YOR184W		YIL023C	YLR270W	YNL024C	YMR220W		YIL152W	YJL147C	YLR201C	YOR161C
YMR311C	YLR262C-A		YOR186W		YIL024C	YLR271W	YNL027W	YMR221C		YIL154C	YJL154C	YLR203C	YOR163W
YMR312W	YLR263W		YOR190W		YIL029C	YLR277C	YNL029C	YMR224C		YIL155C	YJL156C	YLR207W	YOR166C
YMR315W	YLR265C		YOR194C		YIL034C	YLR285W	YNL030W	YMR230W-A		YIL157C	YJL160C	YLR210W	YOR167C
YNL002C	YLR266C		YOR196C		YIL035C	YLR287C-A	YNL032W	YMR232W		YIL161W	YJL165C	YLR211C	YOR174W
YNL005C	YLR267W		YOR197W		YIL038C	YLR288C	YNL035C	YMR234W		YIL164C	YJL166W	YLR214W	YOR177C
YNL010W	YLR268W		YOR201C		YIL040W	YLR289W	YNL036W	YMR236W		YIR001C	YJL167W	YLR215C	YOR184W
YNL015W	YLR270W		YOR202W		YIL041W	YLR291C	YNL040W	YMR237W		YIR003W	YJL168C	YLR218C	YOR186W
YNL027W	YLR271W		YOR205C		YIL044C	YLR292C	YNL044W	YMR240C		YIR005W	YJL170C	YLR221C	YOR190W
YNL029C	YLR283W		YOR208W		YIL046W	YLR299W	YNL046W	YMR243C		YIR007W	YJL177W	YLR224W	YOR193W
YNL032W	YLR284C		YOR209C		YIL046W-A	YLR300W	YNL053W	YMR244W		YIR010W	YJL178C	YLR225C	YOR196C
YNL039W	YLR285C-A		YOR212W		YIL049W	YLR306W	YNL059C	YMR247C		YIR012W	YJL186W	YLR226W	YOR209C
YNL041C	YLR286C		YOR213C		YIL050W	YLR308W	YNL062C	YMR247W-A		YIR013C	YJL191W	YLR227C	YOR220W
YNL042W-B	YLR287C-A		YOR229W		YIL051C	YLR309C	YNL063W	YMR250W		YIR015W	YJL193W	YLR228C	YOR223W
YNL046W	YLR289W		YOR237W		YIL053W	YLR312C	YNL073W	YMR253C		YIR016W	YJL194W	YLR237W	YOR224C
YNL047C	YLR292C		YOR238W		YIL055C	YLR313C	YNL074C	YMR260C		YIR017C	YJL196C	YLR243W	YOR229W
YNL052W	YLR295C		YOR242C		YIL057C	YLR316C	YNL077W	YMR264W		YIR018W	YJL203W	YLR246W	YOR236W
YNL053W	YLR297W		YOR249C		YIL060W	YLR323C	YNL078W	YMR265C		YIR021W	YJL204C	YLR251W	YOR237W
YNL058C	YLR298C		YOR264W		YIL061C	YLR324W	YNL090W	YMR267W		YIR022W	YJL208C	YLR253W	YOR244W
YNL059C	YLR300W		YOR272W		YIL064W	YLR325C	YNL097C	YMR268C		YIR026C	YJL209W	YLR254C	YOR250C
YNL062C	YLR306W		YOR279C		YIL067C	YLR326W	YNL098C	YMR273C		YIR034C	YJL210W	YLR260W	YOR251C
YNL063W	YLR307W		YOR281C		YIL069C	YLR329W	YNL100W	YMR274C		YIR035C	YJL213W	YLR262C	YOR253W
YNL073W	YLR308W		YOR283W		YIL070C	YLR343W	YNL108C	YMR279C		YIR036C	YJL217W	YLR262C-A	YOR259C
YNL074C	YLR309C		YOR286W		YIL072W	YLR345W	YNL110C	YMR283C		YIR038C	YJR005W	YLR263W	YOR261C
YNL078W	YLR312C		YOR293C-A		YIL074C	YLR346C	YNL116W	YMR284W		YIR039C	YJR008W	YLR265C	YOR262W
YNL079C	YLR313C		YOR302W		YIL076W	YLR352W	YNL122C	YMR285C		YIR042C	YJR009C	YLR266C	YOR281C
YNL090W	YLR314C		YOR306C		YIL077C	YLR355C	YNL124W	YMR286W		YJL002C	YJR015W	YLR267W	YOR283W
YNL093W	YLR315W		YOR308C		YIL078W	YLR356W	YNL127W	YMR289W		YJL003W	YJR025C	YLR268W	YOR286W
YNL097C	YLR316C		YOR315W		YIL079C	YLR360W	YNL128W	YMR293C		YJL004C	YJR034W	YLR277C	YOR293C-A
YNL104C	YLR318W		YOR316C		YIL083C	YLR361C-A	YNL131W	YMR294W		YJL006C	YJR042W	YLR284C	YOR297C
YNL107W	YLR323C		YOR316C-A		YIL084C	YLR367W	YNL141W	YMR305C		YJL011C	YJR043C	YLR285C-A	YOR298C-A
YNL108C	YLR328W		YOR324C		YIL085C	YLR369W	YNL144C	YMR310C		YJL019W	YJR048W	YLR286C	YOR298W
YNL110C	YLR329W		YOR327C		YIL087C	YLR375W	YNL147W	YMR311C		YJL020C	YJR049C	YLR287C	YOR302W
YNL111C	YLR343W		YOR335C		YIL088C	YLR378C	YNL149C	YMR313C		YJL023C	YJR050W	YLR288C	YOR303W
YNL113W	YLR345W		YOR336W		YIL090W	YLR380W	YNL151C	YMR314W		YJL024C	YJR052W	YLR289W	YOR304C-A
YNL116W	YLR350W		YOR338W		YIL091C	YLR387C	YNL153C	YMR315W		YJL025W	YJR055W	YLR291C	YOR306C
YNL124W	YLR352W		YOR339C		YIL092W	YLR390W	YNL155W	YNL002C		YJL027C	YJR056C	YLR292C	YOR323C
YNL127W	YLR354C		YOR344C		YIL093C	YLR390W-A	YNL156C	YNL003C		YJL031C	YJR057W	YLR295C	YOR327C
YNL130C-A	YLR355C		YOR346W		YIL094C	YLR392C	YNL158W	YNL005C		YJL033W	YJR058C	YLR298C	YOR339C
YNL131W	YLR360W		YOR348C		YIL096C	YLR399C	YNL159C	YNL010W		YJL036W	YJR060W	YLR299W	YOR346W
YNL137C	YLR361C		YOR354C		YIL097W	YLR403W	YNL160W	YNL015W		YJL037W	YJR063W	YLR305C	YOR347C
YNL138W	YLR369W		YOR362C		YIL098C	YLR404W	YNL161W	YNL016W		YJL042W	YJR069C	YLR312C	YOR354C
YNL141W	YLR372W		YOR365C		YIL099W	YLR406C	YNL168C	YNL024C		YJL043W	YJR075W	YLR313C	YOR365C
YNL144C	YLR373C		YOR370C		YIL102C	YLR406C-A	YNL169C	YNL035C		YJL044C	YJR077C	YLR315W	YOR370C
YNL146W	YLR380W		YOR374W		YIL103W	YLR408C	YNL173C	YNL037C		YJL046W	YJR078W	YLR316C	YOR381W
YNL148C	YLR387C		YOR375C		YIL106W	YLR412C-A	YNL177C	YNL039W		YJL047C	YJR080C	YLR318W	YOR382W
YNL151C	YLR388W		YOR376W-A		YIL108W	YLR413W	YNL180C	YNL040W		YJL047C-A	YJR082C	YLR321C	YOR385W
YNL152W	YLR390W		YOR377W		YIL113W	YLR414C	YNL181W	YNL041C		YJL048C	YJR085C	YLR324W	YPL003W
YNL153C	YLR394W		YOR378W		YIL114C	YLR417W	YNL188W	YNL042W-B		YJL049W	YJR086W	YLR325C	YPL004C
YNL154C	YLR406C-A		YOR382W		YIL116W	YLR420W	YNL194C	YNL047C		YJL054W	YJR093C	YLR328W	YPL010W
YNL156C	YLR408C		YPL002C		YIL120W	YLR423C	YNL196C	YNL050C		YJL055W	YJR094W-A	YLR329W	YPL011C
YNL157W	YLR409C		YPL003W		YIL121W	YLR424W	YNL199C	YNL054W		YJL059W	YJR095W	YLR332W	YPL015C
YNL160W	YLR413W		YPL011C		YIL123W	YLR426W	YNL204C	YNL059C		YJL060W	YJR096W	YLR336C	YPL022W
YNL161W	YLR414C		YPL016W		YIL127C	YLR431C	YNL206C	YNL065W		YJL062W-A	YJR099W	YLR343W	YPL029W
YNL163C	YLR423C		YPL027W		YIL132C	YLR432W	YNL207W	YNL066W		YJL065C	YJR100C	YLR345W	YPL030W
YNL169C	YLR426W		YPL033C		YIL138C	YLR438W	YNL215W	YNL073W		YJL068C	YJR101W	YLR346C	YPL034W
YNL180C	YLR427W		YPL040C		YIL142W	YLR439W	YNL218W	YNL077W		YJL069C	YJR103W	YLR352W	YPL041C
YNL181W	YLR431C		YPL047W		YIL144W	YLR442C	YNL231C	YNL079C		YJL071W	YJR110W	YLR356W	YPL045W
YNL182C	YLR432W		YPL051W		YIL145C	YLR445W	YNL239W	YNL084C		YJL072C	YJR115W	YLR357W	YPL047W
YNL188W	YLR438C-A		YPL052W		YIL152W	YLR447C	YNL240C	YNL090W		YJL073W	YJR116W	YLR360W	YPL055C
YNL190W	YLR438W		YPL059W		YIL153W	YLR452C	YNL248C	YNL097C		YJL074C	YJR117W	YLR361C	YPL059W
YNL191W	YLR443W		YPL066W		YIL154C	YLR453C	YNL251C	YNL104C		YJL076W	YJR118C	YLR363W-A	YPL074W
YNL196C	YLR445W		YPL071C		YIL155C	YLR456W	YNL253W	YNL107W		YJL077C	YJR120W	YLR364W	YPL086C
YNL199C	YLR447C		YPL072W		YIL157C	YLR457C	YNL254C	YNL108C		YJL077W-B	YJR129C	YLR369W	YPL088W
YNL206C	YLR452C		YPL074W		YIL161W	YLR459W	YNL260C	YNL110C		YJL078C	YJR133W	YLR375W	YPL096W
YNL207W	YLR453C		YPL077C		YIL164C	YLR461W	YNL261W	YNL118C		YJL079C	YJR135C	YLR385C	YPL101W
YNL211C	YLR457C		YPL086C		YIR001C	YML007C-A	YNL263C	YNL126W		YJL080C	YJR139C	YLR388W	YPL108W
YNL217W	YLR459W		YPL088W		YIR003W	YML009C	YNL265C	YNL127W		YJL084C	YJR141W	YLR389C	YPL110C
YNL218W	YLR461W		YPL096C-A		YIR004W	YML014W	YNL269W	YNL128W		YJL088W	YJR142W	YLR390W	YPL117C
YNL222W	YML014W		YPL096W		YIR005W	YML018C	YNL275W	YNL138W		YJL090C	YJR144W	YLR390W-A	YPL119C
YNL230C	YML017W		YPL099C		YIR007W	YML020W	YNL277W	YNL141W		YJL094C	YJR147W	YLR394W	YPL121C
YNL231C	YML018C		YPL100W		YIR010W	YML021C	YNL280C	YNL145W		YJL096W	YJR152W	YLR397C	YPL134C
YNL236W	YML019W		YPL101W		YIR011C	YML022W	YNL288W	YNL146C-A		YJL099W	YJR153W	YLR399C	YPL138C
YNL239W	YML023C		YPL107W		YIR012W	YML023C	YNL293W	YNL149C		YJL100W	YJR154W	YLR404W	YPL144W
YNL243W	YML024W		YPL111W		YIR013C	YML025C	YNL295W	YNL152W		YJL101C	YKL002W	YLR405W	YPL147W
YNL245C	YML025C		YPL119C		YIR015W	YML027W	YNL301C	YNL155W		YJL103C	YKL003C	YLR406C-A	YPL148C
YNL251C	YML029W		YPL119C-A		YIR018W	YML030W	YNL307C	YNL157W		YJL104W	YKL004W	YLR408C	YPL150W
YNL252C	YML030W		YPL123C		YIR021W	YML042W	YNL308C	YNL158W		YJL105W	YKL006C-A	YLR409C	YPL164C
YNL253W	YML041C		YPL124W		YIR022W	YML043C	YNL309W	YNL159C		YJL106W	YKL006W	YLR414C	YPL165C
YNL254C	YML042W		YPL127C		YIR026C	YML046W	YNL311C	YNL162W-A		YJL107C	YKL007W	YLR422W	YPL166W
YNL260C	YML043C		YPL132W		YIR027C	YML047C	YNL312W	YNL163C		YJL110C	YKL008C	YLR423C	YPL172C
YNL261W	YML048W		YPL134C		YIR030C	YML048W	YNL316C	YNL173C		YJL111W	YKL009W	YLR425W	YPL173W
YNL272C	YML050W		YPL135W		YIR034C	YML050W	YNL328C	YNL181W		YJL112W	YKL013C	YLR431C	YPL177C
YNL275W	YML056C		YPL138C		YIR035C	YML053C	YNL332W	YNL188W		YJL115W	YKL016C	YLR438C-A	YPL181W
YNL277W	YML057W		YPL139C		YIR036C	YML056C	YNL333W	YNL191W		YJL116C	YKL021C	YLR439W	YPL183C
YNL280C	YML058W-A		YPL141C		YIR038C	YML065W	YNL336W	YNL192W		YJL117W	YKL022C	YLR443W	YPL183W-A
YNL283C	YML062C		YPL148C		YIR039C	YML066C	YNR002C	YNL194C		YJL118W	YKL023W	YLR445W	YPL193W
YNL288W	YML064C		YPL152W-A		YJL002C	YML070W	YNR003C	YNL196C		YJL121C	YKL024C	YLR446W	YPL194W
YNL290W	YML070W		YPL156C		YJL004C	YML071C	YNR007C	YNL199C		YJL122W	YKL025C	YLR451W	YPL196W
YNL291C	YML071C		YPL157W		YJL006C	YML074C	YNR008W	YNL201C		YJL124C	YKL026C	YLR452C	YPL201C
YNL292W	YML074C		YPL164C		YJL011C	YML086C	YNR015W	YNL202W		YJL125C	YKL027W	YLR453C	YPL206C
YNL293W	YML079W		YPL166W		YJL019W	YML088W	YNR018W	YNL206C		YJL126W	YKL037W	YLR455W	YPL211W
YNL302C	YML081C-A		YPL168W		YJL023C	YML102W	YNR023W	YNL207W		YJL127C	YKL039W	YLR456W	YPL222W
YNL305C	YML087C		YPL173W		YJL024C	YML107C	YNR027W	YNL210W		YJL127C-B	YKL040C	YLR457C	YPL224C
YNL307C	YML094W		YPL177C		YJL025W	YML110C	YNR029C	YNL217W		YJL128C	YKL041W	YLR459W	YPL235W
YNL308C	YML097C		YPL183W-A		YJL027C	YML111W	YNR033W	YNL218W		YJL131C	YKL043W	YLR461W	YPL236C
YNL309W	YML098W		YPL189C-A		YJL031C	YML112W	YNR039C	YNL225C		YJL132W	YKL046C	YML009C	YPL239W
YNL311C	YML101C		YPL194W		YJL033W	YML115C	YNR040W	YNL231C		YJL133W	YKL047W	YML014W	YPL240C
YNL312W	YML110C		YPL206C		YJL036W	YML119W	YNR041C	YNL232W		YJL137C	YKL049C	YML019W	YPL241C
YNL313C	YML116W		YPL208W		YJL037W	YML125C	YNR051C	YNL236W		YJL143W	YKL053C-A	YML022W	YPL243W
YNL314W	YML118W		YPL209C		YJL038C	YML130C	YNR053C	YNL238W		YJL144W	YKL056C	YML023C	YPL244C
YNL316C	YML120C		YPL213W		YJL039C	YMR001C-A	YNR059W	YNL239W		YJL145W	YKL061W	YML027W	YPL246C
YNL326C	YML125C		YPL227C		YJL041W	YMR013W-A	YNR061C	YNL240C		YJL147C	YKL062W	YML034W	YPL248C
YNL330C	YML126C		YPL230W		YJL044C	YMR014W	YNR062C	YNL248C		YJL151C	YKL063C	YML042W	YPL257W
YNL333W	YML129C		YPL236C		YJL046W	YMR015C	YNR063W	YNL251C		YJL154C	YKL064W	YML043C	YPL258C
YNL334C	YMR004W		YPL239W		YJL047C	YMR017W	YNR064C	YNL252C		YJL155C	YKL072W	YML046W	YPL259C
YNL336W	YMR005W		YPL240C		YJL047C-A	YMR018W	YNR066C	YNL261W		YJL156C	YKL074C	YML047C	YPL267W
YNR004W	YMR013W-A		YPL242C		YJL048C	YMR019W	YNR073C	YNL265C		YJL160C	YKL078W	YML048W	YPL272C
YNR006W	YMR016C		YPL244C		YJL051W	YMR020W	YNR075W	YNL275W		YJL165C	YKL079W	YML050W	YPL273W
YNR007C	YMR017W		YPL247C		YJL054W	YMR026C	YOL003C	YNL284C		YJL167W	YKL080W	YML054C-A	YPR004C
YNR014W	YMR018W		YPL248C		YJL055W	YMR031C	YOL009C	YNL292W		YJL168C	YKL086W	YML057W	YPR005C
YNR015W	YMR020W		YPL267W		YJL059W	YMR034C	YOL013C	YNL293W		YJL170C	YKL088W	YML062C	YPR011C
YNR020C	YMR023C		YPL272C		YJL060W	YMR041C	YOL014W	YNL302C		YJL173C	YKL089W	YML070W	YPR015C
YNR029C	YMR029C		YPR005C		YJL061W	YMR048W	YOL019W-A	YNL304W		YJL177W	YKL094W	YML074C	YPR017C
YNR030W	YMR031C		YPR007C		YJL063C	YMR053C	YOL023W	YNL307C		YJL178C	YKL095W	YML076C	YPR019W
YNR032C-A	YMR032W		YPR009W		YJL066C	YMR061W	YOL025W	YNL309W		YJL179W	YKL096W-A	YML078W	YPR026W
YNR033W	YMR035W		YPR011C		YJL068C	YMR067C	YOL031C	YNL311C		YJL181W	YKL098W	YML079W	YPR032W
YNR035C	YMR041C		YPR015C		YJL069C	YMR069W	YOL033W	YNL312W		YJL183W	YKL099C	YML081C-A	YPR033C
YNR036C	YMR044W		YPR017C		YJL071W	YMR073C	YOL044W	YNL313C		YJL184W	YKL100C	YML088W	YPR037C
YNR039C	YMR049C		YPR021C		YJL072C	YMR080C	YOL048C	YNL314W		YJL186W	YKL103C	YML094W	YPR051W
YNR043W	YMR053C		YPR025C		YJL073W	YMR084W	YOL049W	YNL316C		YJL193W	YKL104C	YML098W	YPR056W
YNR053C	YMR060C		YPR032W		YJL076W	YMR085W	YOL053W	YNL323W		YJL196C	YKL107W	YML101C	YPR058W
YNR057C	YMR065W		YPR041W		YJL077C	YMR092C	YOL055C	YNL326C		YJL200C	YKL108W	YML102W	YPR068C
YNR059W	YMR069W		YPR051W		YJL078C	YMR093W	YOL056W	YNL332W		YJL203W	YKL110C	YML107C	YPR070W
YNR061C	YMR070W		YPR056W		YJL080C	YMR094W	YOL057W	YNL336W		YJL204C	YKL113C	YML109W	YPR071W
YNR062C	YMR079W		YPR057W		YJL081C	YMR095C	YOL066C	YNR007C		YJL208C	YKL114C	YML110C	YPR091C
YNR063W	YMR080C		YPR061C		YJL084C	YMR098C	YOL068C	YNR008W		YJL209W	YKL116C	YML115C	YPR101W
YNR066C	YMR085W		YPR068C		YJL088W	YMR099C	YOL069W	YNR015W		YJL210W	YKL119C	YML116W	YPR105C
YNR074C	YMR088C		YPR071W		YJL090C	YMR104C	YOL072W	YNR024W		YJL213W	YKL120W	YML121W	YPR106W
YNR075W	YMR089C		YPR078C		YJL094C	YMR107W	YOL073C	YNR027W		YJL217W	YKL122C	YML125C	YPR110C
YOL002C	YMR091C		YPR079W		YJL096W	YMR108W	YOL077W-A	YNR029C		YJR003C	YKL126W	YMR001C-A	YPR111W
YOL003C	YMR092C		YPR083W		YJL099W	YMR114C	YOL080C	YNR030W		YJR004C	YKL127W	YMR004W	YPR116W
YOL005C	YMR093W		YPR085C		YJL100W	YMR116C	YOL082W	YNR031C		YJR005W	YKL130C	YMR013W-A	YPR124W
YOL007C	YMR094W		YPR094W		YJL101C	YMR120C	YOL086W-A	YNR032C-A		YJR008W	YKL132C	YMR016C	YPR128C
YOL011W	YMR095C		YPR100W		YJL102W	YMR123W	YOL088C	YNR033W		YJR009C	YKL135C	YMR017W	YPR133W-A
YOL012C	YMR096W		YPR101W		YJL103C	YMR137C	YOL093W	YNR035C		YJR013W	YKL137W	YMR020W	YPR135W
YOL013C	YMR114C		YPR107C		YJL104W	YMR146C	YOL095C	YNR036C		YJR015W	YKL139W	YMR026C	YPR139C
YOL013W-A	YMR116C		YPR108W-A		YJL105W	YMR147W	YOL098C	YNR039C		YJR022W	YKL140W	YMR029C	YPR151C
YOL025W	YMR121C		YPR111W		YJL106W	YMR148W	YOL101C	YNR040W		YJR024C	YKL142W	YMR034C	YPR154W
YOL031C	YMR124W		YPR118W		YJL107C	YMR153W	YOL105C	YNR043W		YJR025C	YKL143W	YMR035W	YPR158W
YOL038W	YMR135C		YPR119W		YJL109C	YMR155W	YOL110W	YNR052C		YJR032W	YKL144C	YMR037C	YPR159C-A
YOL041C	YMR137C		YPR122W		YJL111W	YMR156C	YOL112W	YNR054C		YJR033C	YKL148C	YMR039C	YPR168W
YOL043C	YMR139W		YPR124W		YJL112W	YMR158W	YOL114C	YNR055C		YJR034W	YKL149C	YMR040W	YPR176C
YOL044W	YMR144W		YPR151C		YJL115W	YMR161W	YOL115W	YNR059W		YJR039W	YKL150W	YMR042W	YPR182W
YOL049W	YMR146C		YPR152C		YJL116C	YMR171C	YOL117W	YNR060W		YJR041C	YKL154W	YMR044W	YPR190C
YOL054W	YMR154C		YPR153W		YJL117W	YMR174C	YOL119C	YNR061C		YJR043C	YKL155C	YMR053C	YPR200C
YOL057W	YMR156C		YPR158W		YJL121C	YMR180C	YOL121C	YNR062C		YJR048W	YKL156W	YMR069W	YPR201W
YOL068C	YMR158W		YPR159C-A		YJL122W	YMR182W-A	YOL122C	YNR063W		YJR049C	YKL159C	YMR070W
YOL070C	YMR160W		YPR160W		YJL123C	YMR184W	YOL125W	YNR064C		YJR050W	YKL160W	YMR073C
YOL073C	YMR161W		YPR166C		YJL125C	YMR187C	YOL126C	YNR066C		YJR052W	YKL161C	YMR079W
YOL088C	YMR166C		YPR168W		YJL126W	YMR188C	YOL127W	YNR067C		YJR054W	YKL162C	YMR080C
YOL092W	YMR168C		YPR174C		YJL127C	YMR193W	YOL128C	YNR069C		YJR055W	YKL167C	YMR088C
YOL093W	YMR172W		YPR176C		YJL127C-B	YMR194C-B	YOL131W	YNR073C		YJR056C	YKL170W	YMR090W
YOL095C	YMR175W		YPR182W		YJL131C	YMR197C	YOL132W	YNR074C		YJR057W	YKL172W	YMR094W
YOL096C	YMR177W		YPR187W		YJL132W	YMR200W	YOL137W	YNR075W		YJR058C	YKL173W	YMR096W
YOL101C	YMR178W		YPR192W		YJL133W	YMR208W	YOL140W	YOL002C		YJR060W	YKL174C	YMR102C
YOL103W	YMR180C				YJL137C	YMR209C	YOL144W	YOL003C		YJR063W	YKL181W	YMR104C
YOL104C	YMR181C				YJL138C	YMR211W	YOL151W	YOL007C		YJR067C	YKL184W	YMR105C
YOL112W	YMR183C				YJL139C	YMR217W	YOL159C-A	YOL008W		YJR068W	YKL186C	YMR107W
YOL114C	YMR187C				YJL143W	YMR224C	YOL162W	YOL011W		YJR069C	YKL187C	YMR108W
YOL115W	YMR188C				YJL146W	YMR226C	YOL164W	YOL013W-A		YJR073C	YKL189W	YMR110C
YOL123W	YMR193W				YJL147C	YMR227C	YOR001W	YOL025W		YJR075W	YKL190W	YMR112C
YOL125W	YMR194C-B				YJL151C	YMR232W	YOR002W	YOL031C		YJR077C	YKL191W	YMR114C
YOL126C	YMR208W				YJL154C	YMR233W	YOR004W	YOL032W		YJR080C	YKL192C	YMR120C
YOL127W	YMR209C				YJL155C	YMR234W	YOR006C	YOL033W		YJR085C	YKL194C	YMR121C
YOL129W	YMR211W				YJL160C	YMR235C	YOR007C	YOL038W		YJR086W	YKL204W	YMR128W
YOL132W	YMR213W				YJL166W	YMR236W	YOR016C	YOL043C		YJR091C	YKL205W	YMR130W
YOL133W	YMR214W				YJL167W	YMR237W	YOR022C	YOL044W		YJR094C	YKL208W	YMR134W
YOL137W	YMR216C				YJL173C	YMR240C	YOR025W	YOL048C		YJR095W	YKL214C	YMR135C
YOL140W	YMR217W				YJL177W	YMR247W-A	YOR026W	YOL053W		YJR096W	YKL215C	YMR137C
YOL143C	YMR220W				YJL178C	YMR250W	YOR027W	YOL054W		YJR099W	YKL216W	YMR139W
YOL145C	YMR221C				YJL179W	YMR251W-A	YOR031W	YOL056W		YJR100C	YKL220C	YMR144W
YOL147C	YMR226C				YJL181W	YMR253C	YOR034C	YOL057W		YJR101W	YKL221W	YMR147W
YOL152W	YMR227C				YJL183W	YMR257C	YOR034C-A	YOL065C		YJR102C	YKR003W	YMR152W
YOL162W	YMR232W				YJL184W	YMR260C	YOR035C	YOL066C		YJR103W	YKR004C	YMR154C
YOR004W	YMR235C				YJL185C	YMR261C	YOR036W	YOL068C		YJR104C	YKR005C	YMR156C
YOR005C	YMR236W				YJL191W	YMR262W	YOR037W	YOL069W		YJR106W	YKR007W	YMR157C
YOR006C	YMR237W				YJL192C	YMR265C	YOR046C	YOL070C		YJR109C	YKR008W	YMR158W
YOR007C	YMR239C				YJL193W	YMR268C	YOR049C	YOL071W		YJR110W	YKR011C	YMR160W
YOR008C-A	YMR240C				YJL194W	YMR269W	YOR051C	YOL072W		YJR115W	YKR013W	YMR161W
YOR010C	YMR244C-A				YJL196C	YMR272C	YOR056C	YOL073C		YJR116W	YKR016W	YMR166C
YOR012W	YMR244W				YJL200C	YMR274C	YOR057W	YOL077W-A		YJR117W	YKR023W	YMR170C
YOR016C	YMR247W-A				YJL201W	YMR278W	YOR061W	YOL082W		YJR118C	YKR024C	YMR171C
YOR020C	YMR250W				YJL203W	YMR284W	YOR062C	YOL086W-A		YJR120W	YKR026C	YMR172W
YOR022C	YMR251W-A				YJL204C	YMR285C	YOR064C	YOL088C		YJR122W	YKR029C	YMR174C
YOR026W	YMR257C				YJL208C	YMR286W	YOR066W	YOL089C		YJR124C	YKR030W	YMR178W
YOR027W	YMR261C				YJL209W	YMR287C	YOR069W	YOL091W		YJR125C	YKR038C	YMR182C
YOR033C	YMR262W				YJL210W	YMR289W	YOR075W	YOL093W		YJR129C	YKR039W	YMR183C
YOR034C	YMR265C				YJL213W	YMR293C	YOR078W	YOL096C		YJR130C	YKR041W	YMR184W
YOR037W	YMR267W				YJL217W	YMR297W	YOR084W	YOL097W-A		YJR133W	YKR043C	YMR187C
YOR040W	YMR270C				YJR003C	YMR300C	YOR085W	YOL104C		YJR134C	YKR044W	YMR193W
YOR042W	YMR272C				YJR004C	YMR301C	YOR087W	YOL107W		YJR135C	YKR045C	YMR194C-B
YOR049C	YMR274C				YJR005W	YMR303C	YOR090C	YOL111C		YJR139C	YKR049C	YMR195W
YOR051C	YMR278W				YJR007W	YMR310C	YOR094W	YOL112W		YJR141W	YKR051W	YMR196W
YOR057W	YMR283C				YJR008W	YMR311C	YOR099W	YOL117W		YJR142W	YKR052C	YMR198W
YOR060C	YMR284W				YJR009C	YMR314W	YOR101W	YOL119C		YJR144W	YKR055W	YMR202W
YOR062C	YMR285C				YJR013W	YMR315W	YOR103C	YOL122C		YJR147W	YKR057W	YMR213W
YOR064C	YMR296C				YJR015W	YMR322C	YOR104W	YOL124C		YJR148W	YKR058W	YMR214W
YOR065W	YMR301C				YJR022W	YNL001W	YOR107W	YOL125W		YJR150C	YKR060W	YMR217W
YOR066W	YMR305C				YJR024C	YNL002C	YOR108W	YOL131W		YJR152W	YKR061W	YMR220W
YOR074C	YMR310C				YJR025C	YNL003C	YOR110W	YOL132W		YJR153W	YKR062W	YMR230W-A
YOR075W	YMR311C				YJR032W	YNL004W	YOR115C	YOL133W		YJR154W	YKR066C	YMR233W
YOR077W	YMR313C				YJR033C	YNL009W	YOR117W	YOL137W		YKL003C	YKR067W	YMR234W
YOR078W	YMR314W				YJR034W	YNL010W	YOR120W	YOL140W		YKL004W	YKR070W	YMR236W
YOR087W	YMR315W				YJR039W	YNL011C	YOR126C	YOL143C		YKL006C-A	YKR074W	YMR237W
YOR089C	YMR315W-A				YJR042W	YNL012W	YOR127W	YOL144W		YKL007W	YKR075C	YMR239C
YOR090C	YNL002C				YJR043C	YNL015W	YOR128C	YOL152W		YKL008C	YKR076W	YMR244C-A
YOR099W	YNL003C				YJR048W	YNL020C	YOR137C	YOL159C-A		YKL009W	YKR078W	YMR244W
YOR101W	YNL004W				YJR049C	YNL022C	YOR145C	YOL164W		YKL011C	YKR080W	YMR247C
YOR103C	YNL005C				YJR052W	YNL024C	YOR147W	YOL164W-A		YKL013C	YKR084C	YMR250W
YOR104W	YNL009W				YJR054W	YNL027W	YOR150W	YOR002W		YKL015W	YKR085C	YMR257C
YOR107W	YNL015W				YJR055W	YNL030W	YOR155C	YOR006C		YKL016C	YKR086W	YMR261C
YOR118W	YNL016W				YJR056C	YNL035C	YOR157C	YOR008C-A		YKL021C	YKR087C	YMR262W
YOR127W	YNL020C				YJR057W	YNL036W	YOR163W	YOR010C		YKL022C	YKR088C	YMR264W
YOR130C	YNL022C				YJR058C	YNL039W	YOR164C	YOR016C		YKL023W	YKR089C	YMR267W
YOR131C	YNL024C				YJR060W	YNL040W	YOR166C	YOR027W		YKL024C	YKR090W	YMR272C
YOR137C	YNL027W				YJR061W	YNL041C	YOR174W	YOR028C		YKL025C	YKR099W	YMR272W-B
YOR138C	YNL035C				YJR063W	YNL042W-B	YOR177C	YOR030W		YKL027W	YKR100C	YMR276W
YOR143C	YNL036W				YJR069C	YNL044W	YOR182C	YOR031W		YKL037W	YKR102W	YMR278W
YOR147W	YNL040W				YJR073C	YNL052W	YOR184W	YOR034C-A		YKL040C	YKR104W	YMR283C
YOR148C	YNL041C				YJR074W	YNL054W	YOR186W	YOR035C		YKL041W	YKR106W	YMR285C
YOR150W	YNL042W-B				YJR075W	YNL058C	YOR193W	YOR039W		YKL043W	YLL001W	YMR289W
YOR155C	YNL044W				YJR076C	YNL059C	YOR196C	YOR040W		YKL046C	YLL004W	YMR292W
YOR161C	YNL046W				YJR077C	YNL062C	YOR197W	YOR045W		YKL047W	YLL005C	YMR294W
YOR168W	YNL047C				YJR078W	YNL063W	YOR201C	YOR046C		YKL048C	YLL006W	YMR297W
YOR174W	YNL050C				YJR080C	YNL067W	YOR209C	YOR051C		YKL051W	YLL006W-A	YMR298W
YOR177C	YNL052W				YJR082C	YNL074C	YOR213C	YOR057W		YKL053C-A	YLL007C	YMR299C
YOR179C	YNL054W				YJR083C	YNL077W	YOR220W	YOR061W		YKL056C	YLL009C	YMR300C
YOR186W	YNL062C				YJR086W	YNL078W	YOR221C	YOR062C		YKL063C	YLL010C	YMR301C
YOR189W	YNL063W				YJR094C	YNL079C	YOR224C	YOR066W		YKL064W	YLL013C	YMR303C
YOR193W	YNL065W				YJR094W-A	YNL080C	YOR229W	YOR069W		YKL070W	YLL014W	YMR305C
YOR196C	YNL066W				YJR095W	YNL084C	YOR232W	YOR070C		YKL071W	YLL018C	YMR311C
YOR198C	YNL070W				YJR096W	YNL090W	YOR238W	YOR074C		YKL072W	YLL018C-A	YMR313C
YOR212W	YNL077W				YJR097W	YNL098C	YOR242C	YOR075W		YKL074C	YLL019C	YMR314W
YOR213C	YNL078W				YJR099W	YNL100W	YOR245C	YOR078W		YKL075C	YLL029W	YMR315W-A
YOR220W	YNL079C				YJR100C	YNL101W	YOR246C	YOR087W		YKL078W	YLL033W	YMR322C
YOR221C	YNL080C				YJR101W	YNL107W	YOR250C	YOR089C		YKL080W	YLL035W	YNL002C
YOR224C	YNL093W				YJR102C	YNL110C	YOR251C	YOR090C		YKL084W	YLL036C	YNL003C
YOR226C	YNL097C				YJR103W	YNL111C	YOR253W	YOR094W		YKL086W	YLL038C	YNL004W
YOR236W	YNL100W				YJR106W	YNL118C	YOR255W	YOR099W		YKL087C	YLL039C	YNL005C
YOR237W	YNL101W				YJR109C	YNL131W	YOR259C	YOR100C		YKL088W	YLL043W	YNL006W
YOR238W	YNL107W				YJR115W	YNL135C	YOR260W	YOR101W		YKL089W	YLL046C	YNL010W
YOR242C	YNL108C				YJR116W	YNL137C	YOR261C	YOR104W		YKL090W	YLL051C	YNL011C
YOR243C	YNL110C				YJR117W	YNL146C-A	YOR262W	YOR106W		YKL091C	YLL052C	YNL016W
YOR250C	YNL122C				YJR120W	YNL146W	YOR264W	YOR107W		YKL093W	YLL053C	YNL024C
YOR255W	YNL127W				YJR122W	YNL148C	YOR269W	YOR110W		YKL094W	YLL056C	YNL032W
YOR260W	YNL128W				YJR124C	YNL149C	YOR272W	YOR115C		YKL095W	YLL060C	YNL037C
YOR261C	YNL130C-A				YJR129C	YNL152W	YOR274W	YOR120W		YKL096W	YLL062C	YNL040W
YOR268C	YNL131W				YJR130C	YNL153C	YOR278W	YOR127W		YKL096W-A	YLL063C	YNL041C
YOR269W	YNL133C				YJR133W	YNL154C	YOR279C	YOR130C		YKL103C	YLR001C	YNL042W-B
YOR272W	YNL134C				YJR134C	YNL156C	YOR280C	YOR137C		YKL104C	YLR009W	YNL046W
YOR275C	YNL137C				YJR139C	YNL158W	YOR281C	YOR144C		YKL107W	YLR010C	YNL050C
YOR278W	YNL138W				YJR141W	YNL159C	YOR286W	YOR145C		YKL108W	YLR011W	YNL052W
YOR279C	YNL141W				YJR142W	YNL162W-A	YOR288C	YOR147W		YKL110C	YLR012C	YNL053W
YOR280C	YNL144C				YJR144W	YNL169C	YOR289W	YOR148C		YKL113C	YLR013W	YNL054W
YOR281C	YNL146C-A				YJR147W	YNL177C	YOR292C	YOR155C		YKL114C	YLR015W	YNL058C
YOR292C	YNL146W				YJR148W	YNL183C	YOR293W	YOR156C		YKL116C	YLR016C	YNL062C
YOR293C-A	YNL147W				YJR150C	YNL196C	YOR298C-A	YOR157C		YKL117W	YLR018C	YNL063W
YOR298C-A	YNL148C				YJR152W	YNL202W	YOR298W	YOR161C		YKL120W	YLR020C	YNL065W
YOR303W	YNL151C				YJR153W	YNL206C	YOR303W	YOR163W		YKL124W	YLR021W	YNL066W
YOR304W	YNL155W				YJR154W	YNL211C	YOR304W	YOR164C		YKL126W	YLR025W	YNL067W-B
YOR308C	YNL156C				YKL002W	YNL218W	YOR305W	YOR166C		YKL127W	YLR027C	YNL077W
YOR315W	YNL157W				YKL003C	YNL222W	YOR315W	YOR167C		YKL130C	YLR029C	YNL079C
YOR316C	YNL158W				YKL004W	YNL225C	YOR316C	YOR168W		YKL132C	YLR033W	YNL080C
YOR316C-A	YNL162W-A				YKL006C-A	YNL236W	YOR316C-A	YOR174W		YKL137W	YLR034C	YNL090W
YOR319W	YNL163C				YKL006W	YNL239W	YOR324C	YOR177C		YKL138C	YLR035C	YNL093W
YOR323C	YNL168C				YKL008C	YNL240C	YOR335C	YOR179C		YKL140W	YLR038C	YNL097C
YOR324C	YNL169C				YKL011C	YNL243W	YOR348C	YOR184W		YKL141W	YLR043C	YNL100W
YOR338W	YNL175C				YKL015W	YNL244C	YOR350C	YOR186W		YKL142W	YLR048W	YNL104C
YOR344C	YNL182C				YKL016C	YNL248C	YOR353C	YOR190W		YKL143W	YLR052W	YNL107W
YOR347C	YNL188W				YKL022C	YNL251C	YOR354C	YOR193W		YKL144C	YLR053C	YNL108C
YOR348C	YNL191W				YKL023W	YNL254C	YOR355W	YOR194C		YKL149C	YLR054C	YNL111C
YOR350C	YNL194C				YKL024C	YNL255C	YOR356W	YOR195W		YKL156W	YLR056W	YNL113W
YOR353C	YNL195C				YKL025C	YNL260C	YOR357C	YOR196C		YKL159C	YLR060W	YNL116W
YOR354C	YNL196C				YKL027W	YNL261W	YOR359W	YOR202W		YKL161C	YLR063W	YNL118C
YOR355W	YNL199C				YKL037W	YNL272C	YOR365C	YOR205C		YKL162C	YLR065C	YNL126W
YOR356W	YNL201C				YKL039W	YNL275W	YOR368W	YOR212W		YKL165C	YLR066W	YNL129W
YOR357C	YNL204C				YKL040C	YNL280C	YOR371C	YOR220W		YKL167C	YLR067C	YNL131W
YOR365C	YNL206C				YKL046C	YNL283C	YOR375C	YOR221C		YKL170W	YLR069C	YNL133C
YOR367W	YNL207W				YKL047W	YNL284C	YOR377W	YOR224C		YKL172W	YLR070C	YNL135C
YOR368W	YNL215W				YKL048C	YNL288W	YOR378W	YOR226C		YKL173W	YLR078C	YNL137C
YOR370C	YNL216W				YKL049C	YNL290W	YOR381W	YOR229W		YKL179C	YLR082C	YNL138W
YOR371C	YNL217W				YKL051W	YNL291C	YOR384W	YOR232W		YKL181W	YLR083C	YNL141W
YOR375C	YNL218W				YKL055C	YNL292W	YOR385W	YOR242C		YKL182W	YLR085C	YNL142W
YOR376W-A	YNL220W				YKL056C	YNL293W	YPL002C	YOR244W		YKL184W	YLR088W	YNL144C
YOR377W	YNL221C				YKL058W	YNL305C	YPL003W	YOR245C		YKL185W	YLR091W	YNL146C-A
YOR378W	YNL222W				YKL060C	YNL308C	YPL011C	YOR246C		YKL187C	YLR093C	YNL146W
YOR384W	YNL223W				YKL061W	YNL312W	YPL020C	YOR249C		YKL190W	YLR094C	YNL153C
YOR385W	YNL225C				YKL062W	YNL317W	YPL028W	YOR250C		YKL191W	YLR098C	YNL156C
YOR386W	YNL229C				YKL064W	YNL320W	YPL029W	YOR253W		YKL192C	YLR099W-A	YNL158W
YPL001W	YNL231C				YKL067W	YNL325C	YPL030W	YOR260W		YKL194C	YLR100W	YNL160W
YPL004C	YNL232W				YKL069W	YNL333W	YPL042C	YOR261C		YKL195W	YLR102C	YNL161W
YPL011C	YNL238W				YKL070W	YNL334C	YPL045W	YOR262W		YKL204W	YLR105C	YNL163C
YPL021W	YNL239W				YKL071W	YNL335W	YPL051W	YOR269W		YKL208W	YLR109W	YNL167C
YPL022W	YNL240C				YKL074C	YNR001C	YPL052W	YOR274W		YKL214C	YLR113W	YNL168C
YPL028W	YNL244C				YKL075C	YNR002C	YPL053C	YOR280C		YKL215C	YLR115W	YNL169C
YPL029W	YNL245C				YKL078W	YNR003C	YPL066W	YOR281C		YKL216W	YLR116W	YNL173C
YPL030W	YNL252C				YKL079W	YNR004W	YPL074W	YOR285W		YKL220C	YLR117C	YNL181W
YPL033C	YNL254C				YKL080W	YNR006W	YPL079W	YOR288C		YKL221W	YLR118C	YNL182C
YPL045W	YNL256W				YKL084W	YNR007C	YPL081W	YOR293C-A		YKR003W	YLR119W	YNL183C
YPL050C	YNL263C				YKL087C	YNR014W	YPL086C	YOR297C		YKR004C	YLR120C	YNL190W
YPL052W	YNL265C				YKL088W	YNR020C	YPL089C	YOR298W		YKR005C	YLR126C	YNL191W
YPL055C	YNL269W				YKL089W	YNR023W	YPL092W	YOR304C-A		YKR007W	YLR128W	YNL194C
YPL057C	YNL272C				YKL091C	YNR030W	YPL096C-A	YOR305W		YKR011C	YLR129W	YNL196C
YPL072W	YNL275W				YKL094W	YNR033W	YPL096W	YOR306C		YKR013W	YLR137W	YNL199C
YPL074W	YNL280C				YKL095W	YNR035C	YPL100W	YOR308C		YKR016W	YLR142W	YNL201C
YPL078C	YNL283C				YKL096W	YNR036C	YPL101W	YOR316C-A		YKR024C	YLR144C	YNL202W
YPL079W	YNL284C				YKL096W-A	YNR037C	YPL103C	YOR323C		YKR026C	YLR145W	YNL204C
YPL081W	YNL291C				YKL099C	YNR039C	YPL107W	YOR332W		YKR030W	YLR146C	YNL206C
YPL086C	YNL301C				YKL103C	YNR040W	YPL108W	YOR336W		YKR036C	YLR147C	YNL210W
YPL088W	YNL302C				YKL104C	YNR041C	YPL109C	YOR338W		YKR037C	YLR151C	YNL215W
YPL089C	YNL304W				YKL107W	YNR043W	YPL111W	YOR339C		YKR038C	YLR152C	YNL218W
YPL092W	YNL306W				YKL108W	YNR051C	YPL112C	YOR346W		YKR039W	YLR154C	YNL221C
YPL099C	YNL307C				YKL110C	YNR052C	YPL116W	YOR350C		YKR041W	YLR163C	YNL225C
YPL103C	YNL308C				YKL112W	YNR060W	YPL117C	YOR354C		YKR043C	YLR165C	YNL229C
YPL107W	YNL309W				YKL113C	YNR062C	YPL119C-A	YOR356W		YKR044W	YLR168C	YNL236W
YPL108W	YNL312W				YKL114C	YNR068C	YPL121C	YOR357C		YKR045C	YLR172C	YNL238W
YPL109C	YNL313C				YKL116C	YNR069C	YPL123C	YOR365C		YKR046C	YLR173W	YNL239W
YPL112C	YNL314W				YKL117W	YNR073C	YPL124W	YOR368W		YKR049C	YLR174W	YNL240C
YPL123C	YNL320W				YKL120W	YNR074C	YPL132W	YOR370C		YKR052C	YLR179C	YNL243W
YPL126W	YNL323W				YKL122C	YNR075W	YPL138C	YOR376W-A		YKR055W	YLR183C	YNL244C
YPL130W	YNL325C				YKL124W	YOL002C	YPL139C	YOR377W		YKR056W	YLR186W	YNL251C
YPL138C	YNL326C				YKL126W	YOL003C	YPL148C	YOR378W		YKR058W	YLR188W	YNL252C
YPL139C	YNL328C				YKL127W	YOL005C	YPL150W	YOR381W		YKR060W	YLR190W	YNL260C
YPL144W	YNL330C				YKL130C	YOL006C	YPL152W-A	YOR382W		YKR062W	YLR192C	YNL261W
YPL147W	YNL332W				YKL132C	YOL007C	YPL156C	YOR384W		YKR064W	YLR195C	YNL265C
YPL150W	YNL333W				YKL135C	YOL008W	YPL159C	YOR386W		YKR067W	YLR196W	YNL269W
YPL158C	YNL334C				YKL137W	YOL009C	YPL165C	YPL003W		YKR070W	YLR199C	YNL272C
YPL166W	YNL335W				YKL138C	YOL011W	YPL168W	YPL015C		YKR075C	YLR200W	YNL275W
YPL168W	YNR004W				YKL139W	YOL012C	YPL171C	YPL022W		YKR077W	YLR203C	YNL277W
YPL171C	YNR006W				YKL140W	YOL016C	YPL172C	YPL026C		YKR078W	YLR208W	YNL277W-A
YPL172C	YNR007C				YKL141W	YOL019W	YPL173W	YPL029W		YKR080W	YLR211C	YNL280C
YPL177C	YNR014W				YKL142W	YOL019W-A	YPL175W	YPL034W		YKR084C	YLR212C	YNL283C
YPL178W	YNR015W				YKL144C	YOL021C	YPL178W	YPL045W		YKR085C	YLR214W	YNL288W
YPL183C	YNR018W				YKL149C	YOL022C	YPL179W	YPL047W		YKR086W	YLR215C	YNL289W
YPL183W-A	YNR020C				YKL150W	YOL023W	YPL181W	YPL052W		YKR087C	YLR216C	YNL291C
YPL184C	YNR027W				YKL154W	YOL024W	YPL184C	YPL055C		YKR092C	YLR218C	YNL292W
YPL188W	YNR030W				YKL155C	YOL026C	YPL188W	YPL066W		YKR097W	YLR220W	YNL293W
YPL189C-A	YNR036C				YKL156W	YOL031C	YPL194W	YPL074W		YKR098C	YLR221C	YNL302C
YPL193W	YNR039C				YKL157W	YOL032W	YPL196W	YPL077C		YKR101W	YLR222C	YNL308C
YPL194W	YNR040W				YKL159C	YOL033W	YPL198W	YPL086C		YKR102W	YLR224W	YNL311C
YPL196W	YNR041C				YKL160W	YOL038W	YPL201C	YPL088W		YKR103W	YLR225C	YNL312W
YPL198W	YNR043W				YKL161C	YOL041C	YPL202C	YPL089C		YKR104W	YLR226W	YNL313C
YPL201C	YNR051C				YKL162C	YOL043C	YPL206C	YPL096W		YKR106W	YLR227C	YNL314W
YPL206C	YNR052C				YKL167C	YOL047C	YPL208W	YPL098C		YLL001W	YLR229C	YNL316C
YPL207W	YNR053C				YKL170W	YOL048C	YPL209C	YPL099C		YLL002W	YLR233C	YNL317W
YPL208W	YNR055C				YKL173W	YOL054W	YPL212C	YPL100W		YLL004W	YLR234W	YNL320W
YPL212C	YNR057C				YKL174C	YOL056W	YPL220W	YPL101W		YLL005C	YLR237W	YNL323W
YPL220W	YNR059W				YKL179C	YOL057W	YPL224C	YPL103C		YLL006W	YLR238W	YNL326C
YPL222W	YNR060W				YKL180W	YOL065C	YPL235W	YPL107W		YLL006W-A	YLR239C	YNL328C
YPL235W	YNR062C				YKL181W	YOL066C	YPL239W	YPL108W		YLL007C	YLR240W	YNL330C
YPL245W	YNR063W				YKL182W	YOL068C	YPL243W	YPL109C		YLL010C	YLR242C	YNL332W
YPL246C	YNR064C				YKL184W	YOL069W	YPL245W	YPL110C		YLL013C	YLR243W	YNL336W
YPL247C	YNR066C				YKL185W	YOL070C	YPL246C	YPL111W		YLL014W	YLR246W	YNR002C
YPL271W	YNR068C				YKL186C	YOL071W	YPL250C	YPL112C		YLL018C	YLR254C	YNR003C
YPL273W	YNR069C				YKL187C	YOL077W-A	YPL254W	YPL117C		YLL019C	YLR260W	YNR007C
YPL277C	YNR073C				YKL189W	YOL080C	YPL256C	YPL119C		YLL025W	YLR262C	YNR014W
YPR004C	YNR075W				YKL190W	YOL082W	YPL258C	YPL119C-A		YLL027W	YLR262C-A	YNR018W
YPR007C	YOL002C				YKL191W	YOL086W-A	YPL259C	YPL133C		YLL029W	YLR263W	YNR020C
YPR009W	YOL003C				YKL194C	YOL088C	YPL273W	YPL134C		YLL032C	YLR264C-A	YNR029C
YPR011C	YOL007C				YKL195W	YOL091W	YPL277C	YPL138C		YLL035W	YLR266C	YNR030W
YPR017C	YOL009C				YKL204W	YOL092W	YPR003C	YPL139C		YLL036C	YLR268W	YNR033W
YPR018W	YOL011W				YKL205W	YOL093W	YPR004C	YPL144W		YLL038C	YLR270W	YNR034W
YPR025C	YOL013W-A				YKL208W	YOL096C	YPR005C	YPL148C		YLL041C	YLR277C	YNR035C
YPR028W	YOL014W				YKL211C	YOL097W-A	YPR011C	YPL152W-A		YLL042C	YLR283W	YNR036C
YPR035W	YOL016C				YKL214C	YOL101C	YPR013C	YPL156C		YLL043W	YLR284C	YNR040W
YPR041W	YOL019W-A				YKL215C	YOL103W	YPR032W	YPL160W		YLL046C	YLR285C-A	YNR043W
YPR052C	YOL022C				YKL216W	YOL104C	YPR033C	YPL164C		YLL051C	YLR285W	YNR052C
YPR056W	YOL023W				YKL220C	YOL111C	YPR035W	YPL165C		YLL052C	YLR286C	YNR055C
YPR060C	YOL025W				YKL221W	YOL112W	YPR037C	YPL168W		YLL056C	YLR287C-A	YNR057C
YPR068C	YOL026C				YKR004C	YOL115W	YPR041W	YPL171C		YLL063C	YLR288C	YNR060W
YPR072W	YOL032W				YKR005C	YOL119C	YPR051W	YPL172C		YLR001C	YLR289W	YNR062C
YPR074C	YOL036W				YKR007W	YOL122C	YPR052C	YPL174C		YLR002C	YLR291C	YNR066C
YPR078C	YOL038W				YKR008W	YOL123W	YPR058W	YPL175W		YLR003C	YLR292C	YNR068C
YPR083W	YOL041C				YKR010C	YOL125W	YPR061C	YPL177C		YLR006C	YLR295C	YNR069C
YPR085C	YOL044W				YKR011C	YOL126C	YPR066W	YPL178W		YLR010C	YLR297W	YNR073C
YPR100W	YOL047C				YKR013W	YOL127W	YPR068C	YPL179W		YLR012C	YLR299W	YNR074C
YPR105C	YOL053W				YKR016W	YOL128C	YPR070W	YPL184C		YLR013W	YLR304C	YNR075W
YPR106W	YOL054W				YKR021W	YOL129W	YPR071W	YPL187W		YLR014C	YLR307W	YOL008W
YPR108W	YOL065C				YKR029C	YOL132W	YPR074C	YPL189W		YLR015W	YLR308W	YOL011W
YPR110C	YOL066C				YKR030W	YOL133W	YPR079W	YPL193W		YLR016C	YLR312C	YOL013W-A
YPR111W	YOL068C				YKR035W-A	YOL137W	YPR083W	YPL194W		YLR017W	YLR315W	YOL016C
YPR118W	YOL080C				YKR036C	YOL140W	YPR085C	YPL201C		YLR018C	YLR316C	YOL019W
YPR125W	YOL086W-A				YKR037C	YOL143C	YPR107C	YPL206C		YLR020C	YLR319C	YOL019W-A
YPR128C	YOL088C				YKR038C	YOL144W	YPR108W	YPL208W		YLR021W	YLR321C	YOL021C
YPR129W	YOL089C				YKR039W	YOL145C	YPR108W-A	YPL209C		YLR022C	YLR323C	YOL022C
YPR131C	YOL095C				YKR041W	YOL147C	YPR111W	YPL211W		YLR025W	YLR324W	YOL025W
YPR133W-A	YOL097W-A				YKR043C	YOL151W	YPR113W	YPL222W		YLR034C	YLR325C	YOL026C
YPR135W	YOL100W				YKR044W	YOL159C-A	YPR116W	YPL224C		YLR035C	YLR326W	YOL031C
YPR137W	YOL101C				YKR045C	YOL163W	YPR118W	YPL236C		YLR038C	YLR327C	YOL032W
YPR139C	YOL103W				YKR046C	YOL164W	YPR128C	YPL240C		YLR040C	YLR328W	YOL033W
YPR151C	YOL105C				YKR051W	YOR001W	YPR131C	YPL241C		YLR043C	YLR329W	YOL041C
YPR152C	YOL108C				YKR055W	YOR004W	YPR132W	YPL243W		YLR044C	YLR332W	YOL044W
YPR153W	YOL110W				YKR058W	YOR005C	YPR137W	YPL244C		YLR047C	YLR341W	YOL047C
YPR154W	YOL111C				YKR060W	YOR007C	YPR138C	YPL245W		YLR048W	YLR343W	YOL048C
YPR156C	YOL114C				YKR061W	YOR008C-A	YPR152C	YPL246C		YLR051C	YLR345W	YOL053W
YPR158W	YOL115W				YKR062W	YOR016C	YPR159W	YPL247C		YLR052W	YLR346C	YOL054W
YPR159C-A	YOL117W				YKR064W	YOR020W-A	YPR163C	YPL249C		YLR053C	YLR350W	YOL056W
YPR160W	YOL119C				YKR066C	YOR025W	YPR167C	YPL250C		YLR054C	YLR352W	YOL065C
YPR167C	YOL121C				YKR067W	YOR026W	YPR169W	YPL254W		YLR063W	YLR353W	YOL070C
YPR171W	YOL123W				YKR070W	YOR027W	YPR171W	YPL258C		YLR065C	YLR354C	YOL071W
YPR175W	YOL125W				YKR074W	YOR030W	YPR174C	YPL259C		YLR066W	YLR356W	YOL072W
YPR182W	YOL128C				YKR075C	YOR033C	YPR175W	YPL267W		YLR069C	YLR357W	YOL073C
YPR185W	YOL129W				YKR076W	YOR034C-A	YPR176C	YPL272C		YLR070C	YLR363W-A	YOL080C
YPR186C	YOL131W				YKR077W	YOR036W	YPR182W	YPL273W		YLR073C	YLR364W	YOL082W
YPR200C	YOL132W				YKR078W	YOR038C	YPR187W	YPL277C		YLR078C	YLR367W	YOL086W-A
YPR201W	YOL133W				YKR080W	YOR046C	YPR190C	YPR004C		YLR079W	YLR369W	YOL087C
	YOL143C				YKR087C	YOR048C	YPR199C	YPR005C		YLR084C	YLR370C	YOL088C
	YOL144W				YKR089C	YOR056C	YPR200C	YPR011C		YLR085C	YLR372W	YOL093W
	YOL146W				YKR097W	YOR057W	YPR201W	YPR013C		YLR086W	YLR385C	YOL096C
	YOL151W				YKR098C	YOR060C		YPR015C		YLR088W	YLR387C	YOL097W-A
	YOL159C				YKR101W	YOR061W		YPR020W		YLR091W	YLR388W	YOL100W
	YOL164W				YKR102W	YOR064C		YPR025C		YLR094C	YLR389C	YOL103W
	YOL164W-A				YKR104W	YOR065W		YPR029C		YLR096W	YLR390W-A	YOL104C
	YOR005C				YKR106W	YOR068C		YPR032W		YLR098C	YLR394W	YOL107W
	YOR007C				YLL001W	YOR070C		YPR037C		YLR099W-A	YLR397C	YOL108C
	YOR010C				YLL002W	YOR074C		YPR041W		YLR100W	YLR399C	YOL110W
	YOR014W				YLL004W	YOR075W		YPR051W		YLR102C	YLR404W	YOL121C
	YOR016C				YLL005C	YOR078W		YPR055W		YLR103C	YLR405W	YOL125W
	YOR020C				YLL006W	YOR079C		YPR057W		YLR104W	YLR406C	YOL128C
	YOR020W-A				YLL006W-A	YOR084W		YPR058W		YLR105C	YLR406C-A	YOL129W
	YOR022C				YLL007C	YOR085W		YPR066W		YLR109W	YLR408C	YOL133W
	YOR026W				YLL009C	YOR089C		YPR067W		YLR113W	YLR412C-A	YOL137W
	YOR027W				YLL013C	YOR090C		YPR068C		YLR114C	YLR414C	YOL140W
	YOR031W				YLL014W	YOR094W		YPR071W		YLR115W	YLR417W	YOL143C
	YOR033C				YLL018C	YOR099W		YPR078C		YLR117C	YLR420W	YOL144W
	YOR034C-A				YLL019C	YOR103C		YPR083W		YLR119W	YLR424W	YOL145C
	YOR035C				YLL025W	YOR106W		YPR085C		YLR120C	YLR427W	YOL146W
	YOR037W				YLL027W	YOR108W		YPR094W		YLR126C	YLR431C	YOL147C
	YOR039W				YLL029W	YOR110W		YPR105C		YLR128W	YLR438C-A	YOL159C-A
	YOR040W				YLL033W	YOR115C		YPR106W		YLR129W	YLR442C	YOL162W
	YOR042W				YLL035W	YOR117W		YPR107C		YLR130C	YLR446W	YOL164W-A
	YOR046C				YLL036C	YOR120W		YPR108W		YLR132C	YLR448W	YOR002W
	YOR049C				YLL038C	YOR122C		YPR111W		YLR133W	YLR452C	YOR004W
	YOR051C				YLL039C	YOR126C		YPR113W		YLR136C	YLR453C	YOR006C
	YOR057W				YLL042C	YOR128C		YPR116W		YLR137W	YLR455W	YOR012W
	YOR060C				YLL043W	YOR130C		YPR118W		YLR141W	YLR459W	YOR016C
	YOR061W				YLL046C	YOR131C		YPR119W		YLR142W	YLR461W	YOR020C
	YOR064C				YLL051C	YOR136W		YPR122W		YLR143W	YML007C-A	YOR025W
	YOR065W				YLL052C	YOR138C		YPR128C		YLR144C	YML014W	YOR026W
	YOR068C				YLL056C	YOR145C		YPR133W-A		YLR146C	YML018C	YOR027W
	YOR070C				YLL060C	YOR147W		YPR138C		YLR147C	YML019W	YOR028C
	YOR074C				YLL062C	YOR150W		YPR139C		YLR151C	YML020W	YOR031W
	YOR075W				YLL063C	YOR156C		YPR143W		YLR152C	YML021C	YOR033C
	YOR078W				YLR001C	YOR157C		YPR151C		YLR154C	YML022W	YOR036W
	YOR079C				YLR003C	YOR161C		YPR153W		YLR164W	YML023C	YOR037W
	YOR084W				YLR006C	YOR163W		YPR154W		YLR165C	YML025C	YOR039W
	YOR089C				YLR009W	YOR168W		YPR158W		YLR168C	YML029W	YOR045W
	YOR090C				YLR010C	YOR177C		YPR160W		YLR172C	YML038C	YOR048C
	YOR094W				YLR011W	YOR182C		YPR166C		YLR173W	YML041C	YOR051C
	YOR099W				YLR012C	YOR184W		YPR167C		YLR174W	YML043C	YOR057W
	YOR100C				YLR013W	YOR185C		YPR168W		YLR179C	YML049C	YOR060C
	YOR101W				YLR014C	YOR186W		YPR171W		YLR180W	YML054C-A	YOR061W
	YOR103C				YLR015W	YOR190W		YPR175W		YLR182W	YML057W	YOR066W
	YOR106W				YLR016C	YOR196C		YPR176C		YLR183C	YML058W-A	YOR070C
	YOR110W				YLR017W	YOR197W		YPR182W		YLR186W	YML064C	YOR075W
	YOR111W				YLR018C	YOR201C		YPR185W		YLR187W	YML066C	YOR078W
	YOR113W				YLR020C	YOR202W		YPR186C		YLR188W	YML071C	YOR079C
	YOR115C				YLR021W	YOR205C		YPR200C		YLR189C	YML073C	YOR081C
	YOR117W				YLR022C	YOR210W		YPR201W		YLR192C	YML074C	YOR085W
	YOR122C				YLR025W	YOR212W				YLR199C	YML076C	YOR087W
	YOR127W				YLR029C	YOR213C				YLR201C	YML078W	YOR094W
	YOR130C				YLR034C	YOR221C				YLR203C	YML079W	YOR099W
	YOR131C				YLR036C	YOR224C				YLR207W	YML081C-A	YOR100C
	YOR136W				YLR038C	YOR226C				YLR208W	YML086C	YOR103C
	YOR138C				YLR040C	YOR229W				YLR210W	YML087C	YOR106W
	YOR145C				YLR042C	YOR232W				YLR211C	YML088W	YOR107W
	YOR147W				YLR043C	YOR236W				YLR212C	YML094W	YOR111W
	YOR148C				YLR044C	YOR237W				YLR214W	YML098W	YOR115C
	YOR150W				YLR047C	YOR238W				YLR216C	YML101C	YOR117W
	YOR155C				YLR049C	YOR251C				YLR218C	YML107C	YOR118W
	YOR156C				YLR051C	YOR253W				YLR219W	YML111W	YOR128C
	YOR157C				YLR053C	YOR259C				YLR220W	YML112W	YOR131C
	YOR159C				YLR054C	YOR260W				YLR222C	YML115C	YOR136W
	YOR161C				YLR056W	YOR261C				YLR224W	YML116W	YOR137C
	YOR163W				YLR060W	YOR262W				YLR225C	YML118W	YOR138C
	YOR164C				YLR063W	YOR264W				YLR227C	YML119W	YOR143C
	YOR174W				YLR065C	YOR269W				YLR233C	YML126C	YOR145C
	YOR179C				YLR066W	YOR278W				YLR234W	YML130C	YOR147W
	YOR180C				YLR069C	YOR279C				YLR237W	YMR001C-A	YOR148C
	YOR182C				YLR070C	YOR285W				YLR239C	YMR013W-A	YOR155C
	YOR183W				YLR073C	YOR286W				YLR240W	YMR015C	YOR156C
	YOR184W				YLR078C	YOR289W				YLR242C	YMR017W	YOR157C
	YOR185C				YLR079W	YOR292C				YLR246W	YMR018W	YOR159C
	YOR189W				YLR082C	YOR293C-A				YLR248W	YMR026C	YOR161C
	YOR190W				YLR083C	YOR297C				YLR251W	YMR029C	YOR163W
	YOR193W				YLR084C	YOR298W				YLR253W	YMR030W	YOR164C
	YOR197W				YLR085C	YOR303W				YLR254C	YMR031C	YOR166C
	YOR201C				YLR088W	YOR304W				YLR260W	YMR034C	YOR168W
	YOR205C				YLR091W	YOR306C				YLR262C	YMR035W	YOR174W
	YOR208W				YLR093C	YOR308C				YLR262C-A	YMR036C	YOR177C
	YOR209C				YLR094C	YOR311C				YLR263W	YMR037C	YOR178C
	YOR210W				YLR099W-A	YOR315W				YLR264C-A	YMR042W	YOR179C
	YOR212W				YLR100W	YOR316C				YLR265C	YMR044W	YOR184W
	YOR213C				YLR102C	YOR319W				YLR266C	YMR048W	YOR185C
	YOR220W				YLR103C	YOR323C				YLR267W	YMR052W	YOR189W
	YOR221C				YLR105C	YOR327C				YLR268W	YMR060C	YOR193W
	YOR223W				YLR109W	YOR332W				YLR270W	YMR061W	YOR197W
	YOR226C				YLR113W	YOR338W				YLR271W	YMR067C	YOR201C
	YOR232W				YLR114C	YOR339C				YLR273C	YMR070W	YOR202W
	YOR236W				YLR116W	YOR347C				YLR283W	YMR073C	YOR209C
	YOR241W				YLR117C	YOR350C				YLR284C	YMR080C	YOR210W
	YOR243C				YLR118C	YOR353C				YLR285C-A	YMR083W	YOR212W
	YOR244W				YLR119W	YOR354C				YLR286C	YMR085W	YOR213C
	YOR245C				YLR120C	YOR355W				YLR287C	YMR087W	YOR220W
	YOR246C				YLR126C	YOR356W				YLR288C	YMR089C	YOR221C
	YOR250C				YLR128W	YOR365C				YLR291C	YMR090W	YOR224C
	YOR251C				YLR129W	YOR375C				YLR292C	YMR091C	YOR226C
	YOR253W				YLR130C	YOR377W				YLR295C	YMR092C	YOR229W
	YOR260W				YLR132C	YOR385W				YLR298C	YMR094W	YOR236W
	YOR264W				YLR135W	YPL001W				YLR299W	YMR095C	YOR238W
	YOR268C				YLR136C	YPL002C				YLR304C	YMR096W	YOR241W
	YOR272W				YLR137W	YPL003W				YLR305C	YMR102C	YOR244W
	YOR274W				YLR141W	YPL004C				YLR306W	YMR104C	YOR245C
	YOR279C				YLR142W	YPL010W				YLR308W	YMR106C	YOR249C
	YOR281C				YLR143W	YPL011C				YLR309C	YMR107W	YOR250C
	YOR283W				YLR144C	YPL026C				YLR312C	YMR108W	YOR255W
	YOR285W				YLR145W	YPL028W				YLR313C	YMR110C	YOR262W
	YOR286W				YLR146C	YPL029W				YLR314C	YMR112C	YOR268C
	YOR289W				YLR151C	YPL034W				YLR315W	YMR114C	YOR269W
	YOR292C				YLR154C	YPL041C				YLR318W	YMR120C	YOR272W
	YOR293W				YLR163C	YPL042C				YLR319C	YMR121C	YOR274W
	YOR297C				YLR164W	YPL045W				YLR321C	YMR123W	YOR278W
	YOR298C-A				YLR165C	YPL053C				YLR323C	YMR130W	YOR279C
	YOR298W				YLR168C	YPL057C				YLR324W	YMR132C	YOR283W
	YOR303W				YLR170C	YPL059W				YLR325C	YMR134W	YOR285W
	YOR304C-A				YLR172C	YPL072W				YLR327C	YMR135C	YOR288C
	YOR304W				YLR173W	YPL074W				YLR328W	YMR137C	YOR293W
	YOR305W				YLR174W	YPL081W				YLR329W	YMR139W	YOR297C
	YOR306C				YLR179C	YPL086C				YLR332W	YMR144W	YOR298C-A
	YOR311C				YLR180W	YPL092W				YLR336C	YMR146C	YOR304C-A
	YOR316C				YLR182W	YPL099C				YLR341W	YMR147W	YOR305W
	YOR319W				YLR183C	YPL100W				YLR343W	YMR148W	YOR306C
	YOR332W				YLR186W	YPL101W				YLR345W	YMR153W	YOR308C
	YOR335C				YLR187W	YPL107W				YLR350W	YMR154C	YOR323C
	YOR339C				YLR188W	YPL109C				YLR352W	YMR155W	YOR335C
	YOR344C				YLR190W	YPL116W				YLR353W	YMR157C	YOR336W
	YOR348C				YLR192C	YPL117C				YLR355C	YMR158W	YOR339C
	YOR350C				YLR195C	YPL119C				YLR356W	YMR161W	YOR346W
	YOR353C				YLR196W	YPL119C-A				YLR360W	YMR166C	YOR347C
	YOR354C				YLR199C	YPL126W				YLR361C	YMR168C	YOR350C
	YOR357C				YLR201C	YPL132W				YLR361C-A	YMR170C	YOR353C
	YOR365C				YLR203C	YPL144W				YLR363W-A	YMR171C	YOR356W
	YOR376W-A				YLR207W	YPL148C				YLR364W	YMR177W	YOR357C
	YOR377W				YLR210W	YPL159C				YLR367W	YMR178W	YOR365C
	YOR381W				YLR211C	YPL164C				YLR369W	YMR180C	YOR367W
	YOR384W				YLR212C	YPL165C				YLR370C	YMR182C	YOR368W
	YOR386W				YLR214W	YPL166W				YLR372W	YMR183C	YOR375C
	YPL002C				YLR215C	YPL168W				YLR373C	YMR184W	YOR377W
	YPL003W				YLR216C	YPL171C				YLR375W	YMR185W	YOR378W
	YPL004C				YLR218C	YPL172C				YLR380W	YMR188C	YOR381W
	YPL010W				YLR219W	YPL174C				YLR385C	YMR193W	YOR382W
	YPL011C				YLR221C	YPL175W				YLR387C	YMR194C-B	YOR385W
	YPL015C				YLR222C	YPL177C				YLR390W	YMR194W	YPL002C
	YPL020C				YLR224W	YPL178W				YLR390W-A	YMR196W	YPL011C
	YPL022W				YLR225C	YPL179W				YLR392C	YMR198W	YPL022W
	YPL026C				YLR226W	YPL181W				YLR394W	YMR200W	YPL026C
	YPL028W				YLR227C	YPL183W-A				YLR397C	YMR203W	YPL029W
	YPL029W				YLR228C	YPL184C				YLR404W	YMR208W	YPL030W
	YPL030W				YLR233C	YPL187W				YLR405W	YMR211W	YPL034W
	YPL034W				YLR234W	YPL196W				YLR406C-A	YMR213W	YPL040C
	YPL040C				YLR237W	YPL198W				YLR409C	YMR214W	YPL041C
	YPL041C				YLR238W	YPL201C				YLR410W	YMR217W	YPL045W
	YPL042C				YLR239C	YPL206C				YLR413W	YMR220W	YPL050C
	YPL043W				YLR240W	YPL207W				YLR417W	YMR221C	YPL051W
	YPL045W				YLR246W	YPL213W				YLR419W	YMR224C	YPL053C
	YPL047W				YLR248W	YPL218W				YLR420W	YMR226C	YPL055C
	YPL052W				YLR251W	YPL221W				YLR424W	YMR227C	YPL059W
	YPL053C				YLR253W	YPL222W				YLR425W	YMR230W-A	YPL066W
	YPL054W				YLR254C	YPL224C				YLR426W	YMR232W	YPL071C
	YPL072W				YLR259C	YPL226W				YLR427W	YMR233W	YPL077C
	YPL078C				YLR260W	YPL227C				YLR431C	YMR239C	YPL089C
	YPL088W				YLR262C	YPL243W				YLR432W	YMR240C	YPL092W
	YPL089C				YLR262C-A	YPL244C				YLR438C-A	YMR241W	YPL096C-A
	YPL096W				YLR263W	YPL245W				YLR439W	YMR244W	YPL098C
	YPL098C				YLR264C-A	YPL246C				YLR442C	YMR247W-A	YPL099C
	YPL100W				YLR266C	YPL247C				YLR446W	YMR250W	YPL103C
	YPL101W				YLR267W	YPL249C				YLR447C	YMR253C	YPL107W
	YPL103C				YLR268W	YPL254W				YLR452C	YMR260C	YPL108W
	YPL109C				YLR271W	YPL256C				YLR453C	YMR261C	YPL116W
	YPL110C				YLR283W	YPL257W				YLR456W	YMR262W	YPL130W
	YPL112C				YLR284C	YPL259C				YLR457C	YMR264W	YPL132W
	YPL116W				YLR285C-A	YPL270W				YLR459W	YMR265C	YPL133C
	YPL117C				YLR285W	YPL273W				YLR461W	YMR267W	YPL134C
	YPL119C				YLR286C	YPL277C				YML009C	YMR269W	YPL139C
	YPL119C-A				YLR287C	YPR004C				YML014W	YMR270C	YPL141C
	YPL126W				YLR287C-A	YPR009W				YML017W	YMR272C	YPL147W
	YPL127C				YLR288C	YPR011C				YML018C	YMR272W-B	YPL148C
	YPL128C				YLR289W	YPR015C				YML019W	YMR276W	YPL159C
	YPL130W				YLR291C	YPR017C				YML020W	YMR278W	YPL166W
	YPL132W				YLR292C	YPR018W				YML021C	YMR283C	YPL168W
	YPL133C				YLR295C	YPR021C				YML022W	YMR284W	YPL171C
	YPL134C				YLR298C	YPR025C				YML024W	YMR289W	YPL172C
	YPL135W				YLR299W	YPR029C				YML025C	YMR290C	YPL173W
	YPL138C				YLR304C	YPR032W				YML029W	YMR292W	YPL174C
	YPL139C				YLR306W	YPR035W				YML030W	YMR293C	YPL175W
	YPL144W				YLR307W	YPR037C				YML038C	YMR294W	YPL181W
	YPL147W				YLR308W	YPR041W				YML041C	YMR296C	YPL183C
	YPL150W				YLR312C	YPR051W				YML043C	YMR297W	YPL183W-A
	YPL152W-A				YLR313C	YPR056W				YML046W	YMR299C	YPL187W
	YPL156C				YLR314C	YPR057W				YML047C	YMR301C	YPL188W
	YPL157W				YLR316C	YPR058W				YML048W	YMR303C	YPL189C-A
	YPL158C				YLR319C	YPR060C				YML050W	YMR305C	YPL189W
	YPL164C				YLR321C	YPR066W				YML056C	YMR307W	YPL193W
	YPL165C				YLR323C	YPR068C				YML057W	YMR310C	YPL196W
	YPL166W				YLR324W	YPR074C				YML058W-A	YMR311C	YPL201C
	YPL168W				YLR325C	YPR079W				YML061C	YMR312W	YPL208W
	YPL171C				YLR326W	YPR083W				YML062C	YMR314W	YPL209C
	YPL172C				YLR327C	YPR086W				YML064C	YMR315W	YPL210C
	YPL178W				YLR328W	YPR094W				YML065W	YMR315W-A	YPL212C
	YPL179W				YLR332W	YPR101W				YML066C	YMR322C	YPL213W
	YPL181W				YLR336C	YPR105C				YML070W	YNL001W	YPL220W
	YPL183C				YLR341W	YPR108W				YML071C	YNL002C	YPL222W
	YPL184C				YLR343W	YPR110C				YML074C	YNL003C	YPL226W
	YPL188W				YLR345W	YPR118W				YML076C	YNL004W	YPL230W
	YPL189W				YLR350W	YPR124W				YML079W	YNL005C	YPL235W
	YPL193W				YLR352W	YPR128C				YML081C-A	YNL006W	YPL239W
	YPL194W				YLR353W	YPR133W-A				YML081W	YNL010W	YPL243W
	YPL198W				YLR354C	YPR135W				YML087C	YNL012W	YPL244C
	YPL208W				YLR355C	YPR137W				YML088W	YNL015W	YPL245W
	YPL210C				YLR356W	YPR138C				YML094W	YNL016W	YPL246C
	YPL212C				YLR357W	YPR139C				YML098W	YNL020C	YPL250C
	YPL214C				YLR360W	YPR152C				YML101C	YNL024C	YPL257W
	YPL218W				YLR361C	YPR153W				YML102W	YNL030W	YPL258C
	YPL222W				YLR361C-A	YPR154W				YML107C	YNL035C	YPL259C
	YPL230W				YLR363W-A	YPR156C				YML110C	YNL036W	YPL264C
	YPL235W				YLR367W	YPR158W				YML111W	YNL039W	YPL271W
	YPL236C				YLR369W	YPR159C-A				YML115C	YNL040W	YPL273W
	YPL239W				YLR370C	YPR163C				YML116W	YNL041C	YPL277C
	YPL243W				YLR372W	YPR165W				YML118W	YNL042W-B	YPR003C
	YPL244C				YLR375W	YPR166C				YML119W	YNL044W	YPR004C
	YPL245W				YLR378C	YPR167C				YML120C	YNL046W	YPR009W
	YPL248C				YLR380W	YPR168W				YML123C	YNL047C	YPR011C
	YPL249C				YLR385C	YPR169W				YML125C	YNL050C	YPR013C
	YPL249C-A				YLR387C	YPR171W				YML129C	YNL052W	YPR015C
	YPL250C				YLR388W	YPR175W				YML130C	YNL053W	YPR017C
	YPL254W				YLR389C	YPR176C				YMR001C-A	YNL058C	YPR018W
	YPL258C				YLR390W	YPR185W				YMR005W	YNL059C	YPR021C
	YPL259C				YLR390W-A	YPR186C				YMR013W-A	YNL063W	YPR025C
	YPL270W				YLR394W	YPR187W				YMR014W	YNL065W	YPR029C
	YPL271W				YLR397C	YPR190C				YMR015C	YNL066W	YPR035W
	YPL273W				YLR399C	YPR192W				YMR016C	YNL070W	YPR037C
	YPR003C				YLR405W	YPR200C				YMR017W	YNL073W	YPR051W
	YPR004C				YLR406C-A	YPR201W				YMR018W	YNL074C	YPR058W
	YPR009W				YLR409C					YMR019W	YNL077W	YPR061C
	YPR011C				YLR410W					YMR020W	YNL078W	YPR066W
	YPR013C				YLR412C-A					YMR023C	YNL080C	YPR067W
	YPR015C				YLR413W					YMR026C	YNL084C	YPR068C
	YPR017C				YLR415C					YMR029C	YNL085W	YPR070W
	YPR020W				YLR417W					YMR030W	YNL090W	YPR078C
	YPR024W				YLR420W					YMR031C	YNL093W	YPR085C
	YPR025C				YLR423C					YMR034C	YNL097C	YPR101W
	YPR028W				YLR424W					YMR035W	YNL100W	YPR106W
	YPR029C				YLR426W					YMR037C	YNL101W	YPR107C
	YPR032W				YLR427W					YMR039C	YNL104C	YPR108W
	YPR037C				YLR431C					YMR040W	YNL107W	YPR111W
	YPR041W				YLR432W					YMR041C	YNL113W	YPR113W
	YPR051W				YLR435W					YMR044W	YNL116W	YPR118W
	YPR061C				YLR438C-A					YMR049C	YNL122C	YPR122W
	YPR067W				YLR438W					YMR052W	YNL124W	YPR124W
	YPR070W				YLR439W					YMR053C	YNL126W	YPR129W
	YPR071W				YLR442C					YMR054W	YNL128W	YPR133W-A
	YPR074C				YLR443W					YMR056C	YNL130C-A	YPR137W
	YPR078C				YLR446W					YMR060C	YNL131W	YPR138C
	YPR083W				YLR447C					YMR061W	YNL132W	YPR154W
	YPR093C				YLR451W					YMR065W	YNL133C	YPR156C
	YPR094W				YLR452C					YMR067C	YNL134C	YPR159C-A
	YPR108W-A				YLR453C					YMR069W	YNL137C	YPR159W
	YPR111W				YLR456W					YMR073C	YNL138W	YPR166C
	YPR118W				YLR457C					YMR079W	YNL142W	YPR167C
	YPR124W				YLR459W					YMR083W	YNL144C	YPR175W
	YPR135W				YLR461W					YMR084W	YNL145W	YPR176C
	YPR137W				YML009C					YMR086W	YNL146C-A	YPR182W
	YPR151C				YML014W					YMR087W	YNL146W	YPR185W
	YPR152C				YML017W					YMR088C	YNL148C	YPR187W
	YPR154W				YML019W					YMR089C	YNL149C	YPR190C
	YPR159C-A				YML020W					YMR091C	YNL151C	YPR199C
	YPR159W				YML021C					YMR092C	YNL152W
	YPR160W				YML022W					YMR093W	YNL153C
	YPR165W				YML023C					YMR094W	YNL154C
	YPR174C				YML024W					YMR095C	YNL155W
	YPR175W				YML025C					YMR096W	YNL159C
	YPR186C				YML027W					YMR099C	YNL161W
	YPR187W				YML029W					YMR102C	YNL162W-A
	YPR190C				YML030W					YMR104C	YNL163C
	YPR192W				YML034W					YMR105C	YNL173C
	YPR199C				YML038C					YMR105W-A	YNL177C
	YPR200C				YML041C					YMR106C	YNL181W
					YML042W					YMR107W	YNL182C
					YML043C					YMR108W	YNL188W
					YML046W					YMR110C	YNL190W
					YML047C					YMR112C	YNL191W
					YML048W					YMR114C	YNL194C
					YML052W					YMR120C	YNL195C
					YML053C					YMR123W	YNL196C
					YML054C-A					YMR124W	YNL199C
					YML056C					YMR128W	YNL204C
					YML057W					YMR130W	YNL206C
					YML058W-A					YMR133W	YNL207W
					YML062C					YMR134W	YNL210W
					YML064C					YMR135C	YNL211C
					YML065W					YMR139W	YNL215W
					YML066C					YMR140W	YNL217W
					YML070W					YMR146C	YNL218W
					YML073C					YMR147W	YNL221C
					YML074C					YMR148W	YNL223W
					YML076C					YMR152W	YNL224C
					YML079W					YMR153W	YNL230C
					YML081C-A					YMR155W	YNL231C
					YML087C					YMR156C	YNL236W
					YML088W					YMR161W	YNL239W
					YML097C					YMR166C	YNL240C
					YML098W					YMR168C	YNL244C
					YML101C					YMR170C	YNL245C
[truncated: 863 more rows]

## Sheet: HyperG Commonly Del. Bkgd List
UID
YAL043C
YAL044C
YBL035C
YBL089W
YBR059C
YBR093C
YBR103W
YBR140C
YBR154C
YBR158W
YBR169C
YBR194W
YBR293W
YBR298C
YCL036W
YCL069W
YCR100C
YDL027C
YDL092W
YDL180W
YDR139C
YDR252W
YDR312W
YDR315C-1
YDR394W
YDR428C
YDR451C
YDR453C
YDR472W
YER038C
YER041W
YER044C
YER048C
YER092W
YER113C
YER169W
YFL040W
YGL013C
YGL164C
YGL197W
YGL213C
YGL233W
YGR128C
YGR142W
YGR173W
YGR248W
YGR250C
YGR278W
YHL002W
YHR013C
YHR156C
YHR188C
YIL002C
YIL068C
YIL071C
YIL096C
YIL117C
YIL146C
YIL158W
YIR003W
YJL053W
YJL071W
YJL082W
YJL108C
YJL206C
YJR002W
YJR011C
YJR059W
YKL005C
YKL113C
YKL172W
YKL197C
YKR039W
YKR055W
YKR105C
YLL054C
YLL061W
YLR004C
YLR015W
YLR019W
YLR045C
YLR059C
YLR068W
YLR097C
YLR102C
YLR177W
YLR186W
YLR231C
YLR265C
YLR436C
YML013W
YML077W
YML083C
YML119W
YML127W
YMR135C
YMR268C
YMR311C
YNL072W
YNL096C
YNL117W
YNL187W
YNL251C
YNL259C
YNL310C
YNL329C
YNR019W
YNR047W
YNR050C
YOL030W
YOL038C-A
YOL139C
YOL144W
YOR016C
YOR059C
YOR099W
YOR127W
YOR172W
YOR186W
YOR212W
YOR216C
YOR271C
YOR310C
YPL018W
YPL139C
YPL163C
YPL252C
YPR046W
YPR127W
YPR144C
YAR002C-A
YAR015W
YBL010C
YBL011W
YBL033C
YBL055C
YBL056W
YBL068W
YBL080C
YBR036C
YBR041W
YBR062C
YBR182C-A
YBR244W
YBR258C
YBR271W
YBR276C
YCL004W
YCL011C
YCL064C
YCR007C
YCR028C-A
YCR043C
YCR068W
YCR071C
YCR084C
YCR090C
YCR106W
YDL040C
YDL069C
YDL075W
YDL083C
YDL087C
YDL097C
YDL101C
YDL135C
YDL142C
YDL182W
YDL213C
YDR003W-A
YDR110W
YDR124W
YDR165W
YDR179W-A
YDR194W-A
YDR225W
YDR228C
YDR311W
YDR339C
YDR350C
YDR359C
YDR367W
YDR379W
YDR429C
YDR462W
YDR465C
YEL001C
YEL029C
YEL049W
YEL057C
YER022W
YER066W
YER076C
YER082C
YER185W
YFL041W-A
YFL042C
YFR005C
YFR018C
YFR022W
YFR039C
YFR047C
YGL019W
YGL029W
YGL056C
YGL087C
YGL119W
YGL254W
YGR077C
YGR109C
YGR122W
YGR147C
YGR163W
YGR168C
YGR180C
YGR204W
YGR225W
YGR226C
YGR231C
YGR244C
YGR263C
YGR268C
YHL012W
YHL019C
YHL044W
YHR014W
YHR036W
YHR044C
YHR108W
YHR111W
YHR122W
YHR133C
YHR151C
YHR177W
YHR202W
YIR005W
YJL027C
YJL121C
YJL125C
YJL174W
YJR003C
YJR009C
YJR051W
YJR055W
YJR096W
YJR119C
YJR152W
YKL007W
YKL008C
YKL027W
YKL037W
YKL043W
YKL096W
YKL132C
YKL146W
YKL154W
YKL183W
YKL222C
YKR001C
YKR008W
YKR043C
YKR044W
YKR065C
YLL004W
YLL007C
YLL055W
YLR011W
YLR051C
YLR077W
YLR098C
YLR104W
YLR107W
YLR151C
YLR211C
YLR216C
YLR239C
YLR253W
YLR266C
YLR284C
YLR295C
YLR313C
YLR324W
YLR345W
YLR375W
YLR380W
YLR395C
YLR431C
YLR449W
YML018C
YML125C
YMR021C
YMR031C
YMR076C
YMR117C
YMR119W
YMR159C
YMR267W
YMR302C
YNL046W
YNL108C
YNL146W
YNL182C
YNL206C
YNL258C
YNL262W
YNL270C
YNL275W
YNL293W
YNL314W
YNL326C
YNR026C
YNR048W
YNR058W
YNR059W
YOL038W
YOL044W
YOL116W
YOL125W
YOL140W
YOR070C
YOR075W
YOR104W
YOR130C
YOR142W
YOR147W
YOR163W
YOR174W
YOR179C
YOR196C
YOR213C
YOR232W
YOR306C
YOR349W
YOR354C
YOR358W
YPL097W
YPL172C
YPL201C
YPL229W
YPL253C
YPR004C
YPR023C
YPR057W
YPR133W-A
YPR158W
YPR180W
YPR188C
YPR200C
YAL016W
YAL064C-A
YAL067C
YBL008W-A
YBL057C
YBL091C-A
YBR003W
YBR018C
YBR020W
YBR026C
YBR045C
YBR058C-A
YBR076W
YBR107C
YBR125C
YBR148W
YBR186W
YBR205W
YBR217W
YBR236C
YBR250W
YBR261C
YBR291C
YBR299W
YCL001W-A
YCL016C
YCL051W
YCR008W
YCR010C
YCR019W
YCR027C
YCR059C
YCR061W
YCR076C
YDL017W
YDL059C
YDL064W
YDL085W
YDL102W
YDL106C
YDL107W
YDL114W
YDL123W
YDL138W
YDL144C
YDL155W
YDL168W
YDL176W
YDL199C
YDR007W
YDR143C
YDR175C
YDR179C
YDR183W
YDR197W
YDR218C
YDR222W
YDR231C
YDR235W
YDR236C
YDR244W
YDR255C
YDR257C
YDR315C
YDR323C
YDR357C
YDR373W
YDR427W
YDR454C
YDR487C
YDR490C
YDR498C
YDR508C
YEL002C
YEL004W
YEL016C
YEL019C
YEL026W
YEL032W
YEL051W
YEL052W
YEL062W
YER006W
YER007W
YER034W
YER039C-A
YER042W
YER049W
YER050C
YER055C
YER059W
YER060W
YER078C
YER096W
YER143W
YER148W
YFL060C
YFR006W
YFR017C
YFR025C
YFR037C
YFR044C
YFR055W
YGL041C-B
YGL043W
YGL057C
YGL065C
YGL081W
YGL091C
YGL117W
YGL142C
YGL145W-1
YGL154C
YGL171W
YGL179C
YGL202W
YGL205W
YGL226C-A
YGL237C
YGL243W
YGL246C
YGL261C
YGR020C
YGR021W
YGR027C
YGR037C
YGR066C
YGR071C
YGR072W
YGR104C
YGR132C
YGR143W
YGR158C
YGR161W-C
YGR165W
YGR172C
YGR185C
YGR187C
YGR210C
YGR236C
YGR252W
YHL001W
YHL011C
YHL013C
YHR022C
YHR039C
YHR051W
YHR088W
YHR090C
YHR092C
YHR118C
YHR136C
YHR148W
YHR176W
YHR182W
YHR210C
YIL040W
YIL046W
YIL067C
YIL083C
YIL089W
YIL097W
YIL098C
YIL121W
YIL127C
YIL145C
YIL152W
YIL160C
YIR010W
YIR021W
YJL059W
YJL065C
YJL066C
YJL072C
YJL091C
YJL099W
YJL103C
YJL127C
YJL143W
YJL153C
YJL156C
YJL160C
YJL166W
YJL186W
YJR025C
YJR036C
YJR048W
YJR058C
YJR069C
YJR080C
YJR112W-A
YJR133W
YKL016C
YKL023W
YKL040C
YKL047W
YKL085W
YKL089W
YKL143W
YKL162C
YKL190W
YKL201C
YKR002W
YKR015C
YKR024C
YKR041W
YKR072C
YKR078W
YKR080W
YKR087C
YLL006W-A
YLL023C
YLL028W
YLL051C
YLL056C
YLR001C
YLR009W
YLR020C
YLR023C
YLR043C
YLR082C
YLR099W-A
YLR113W
YLR117C
YLR118C
YLR126C
YLR146C
YLR180W
YLR192C
YLR200W
YLR204W
YLR208W
YLR226W
YLR262C-A
YLR268W
YLR274W
YLR286C
YLR328W
YLR352W
YLR369W
YLR457C
YLR459W
YML014W
YML027W
YML031W
YML036W
YML050W
YML066C
YML069W
YML076C
YML101C
YML105C
YMR001C-A
YMR013W-A
YMR018W
YMR029C
YMR097C
YMR100W
YMR137C
YMR155W
YMR158W
YMR171C
YMR173W
YMR193W
YMR208W
YMR215W
YMR228W
YMR240C
YMR251W
YMR253C
YMR258C
YMR261C
YMR265C
YMR278W
YMR284W
YMR286W
YMR305C
YMR315W-A
YMR318C
YNL002C
YNL003C
YNL015W
YNL041C
YNL062C
YNL084C
YNL090W
YNL107W
YNL128W
YNL133C
YNL138W
YNL156C
YNL204C
YNL213C
YNL249C
YNL263C
YNL269W
YNL280C
YNL284C
YNL288W
YNL291C
YNL307C
YNL315C
YNL316C
YNL332W
YNL334C
YNR038W
YNR062C
YNR066C
YNR068C
YNR074C
YNR075W
YOL003C
YOL010W
YOL032W
YOL033W
YOL043C
YOL048C
YOL088C
YOL091W
YOL093W
YOL095C
YOL096C
YOL132W
YOL133W
YOL137W
YOL143C
YOL159C-A
YOL164W
YOR006C
YOR057W
YOR100C
YOR103C
YOR115C
YOR137C
YOR150W
YOR193W
YOR197W
YOR201C
YOR215C
YOR220W
YOR224C
YOR229W
YOR279C
YOR286W
YOR298W
YOR316C
YOR323C
YOR357C
YOR365C
YOR378W
YPL003W
YPL101W
YPL122C
YPL138C
YPL168W
YPL178W
YPL181W
YPL199C
YPL233W
YPL245W
YPL255W
YPL259C
YPR009W
YPR011C
YPR025C
YPR032W
YPR041W
YPR068C
YPR075C
YPR085C
YPR107C
YPR111W
YPR141C
YPR167C
YPR196W
YAL009W
YAL012W
YAL015C
YAL018C
YAL020C
YAL022C
YAL027W
YAL028W
YAL033W
YAL053W
YAL062W
YAR027W
YBL002W
YBL019W
YBL050W
YBL064C
YBL069W
YBL081W
YBL090W
YBR002C
YBR005W
YBR007C
YBR011C
YBR022W
YBR028C
YBR043C
YBR060C
YBR063C
YBR067C
YBR070C
YBR077C
YBR085C-A
YBR095C
YBR096W
YBR120C
YBR130C
YBR132C
YBR133C
YBR141C
YBR147W
YBR155W
YBR182C
YBR185C
YBR193C
YBR198C
YBR199W
YBR216C
YBR228W
YBR234C
YBR246W
YBR249C
YBR254C
YBR273C
YBR301W
YCL001W
YCL010C
YCL017C
YCL026C-B
YCL052C
YCR015C
YCR016W
YCR036W
YCR046C
YCR060W
YCR079W
YCR094W
YCR095W-A
YDL007W
YDL012C
YDL044C
YDL046W
YDL055C
YDL056W
YDL088C
YDL089W
YDL100C
YDL110C
YDL113C
YDL115C
YDL125C
YDL146W
YDL149W
YDL150W
YDL159W-A
YDL160C-A
YDL166C
YDL169C
YDL170W
YDL175C
YDL179W
YDL200C
YDL209C
YDL211C
YDL217C
YDL243C
YDR003W
YDR032C
YDR044W
YDR045C
YDR087C
YDR100W
YDR101C
YDR108W
YDR118W
YDR138W
YDR148C
YDR152W
YDR153C
YDR158W
YDR162C
YDR163W
YDR169C-A
YDR171W
YDR177W
YDR178W
YDR191W
YDR202C
YDR229W
YDR237W
YDR243C
YDR245W
YDR246W-A
YDR259C
YDR265W
YDR292C
YDR296W
YDR297W
YDR316W
YDR317W
YDR321W
YDR330W
YDR332W
YDR347W
YDR362C
YDR372C
YDR381W
YDR386W
YDR408C
YDR425W
YDR459C
YDR460W
YDR461W
YDR473C
YDR480W
YDR489W
YDR501W
YDR510W
YDR514C
YDR522C
YDR529C
YDR532C
YDR534C
YDR536W
YDR541C
YEL011W
YEL037C
YEL039C
YEL050C
YEL056W
YEL058W
YEL063C
YER016W
YER023W
YER037W
YER044C-A
YER051W
YER061C
YER067W
YER073W
YER077C
YER080W
YER086W
YER101C
YER124C
YER137C
YER146W
YER174C
YER177W
YFL002C
YFL012W
YFL017C
YFL026W
YFL028C
YFL030W
YFL044C
YFL052W
YFR002W
YFR024C-A
YFR045W
YFR049W
YFR050C
YFR051C
YGL004C
YGL026C
YGL028C
YGL037C
YGL058W
YGL064C
YGL067W
YGL080W
YGL095C
YGL098W
YGL121C
YGL158W
YGL194C
YGL196W
YGL212W
YGL227W
YGL231C
YGL245W
YGR002C
YGR007W
YGR016W
YGR038W
YGR042W
YGR043C
YGR045C
YGR063C
YGR088W
YGR096W
YGR099W
YGR101W
YGR105W
YGR106C
YGR127W
YGR129W
YGR146C-A
YGR153W
YGR154C
YGR155W
YGR174C
YGR197C
YGR204C-A
YGR206W
YGR207C
YGR211W
YGR215W
YGR220C
YGR227W
YGR232W
YGR233C
YGR237C
YGR262C
YGR264C
YGR267C
YGR288W
YHL008C
YHL039W
YHL042W
YHR005C
YHR021C
YHR032W
YHR033W
YHR046C
YHR047C
YHR048W
YHR059W
YHR071W
YHR075C
YHR076W
YHR086W-A
YHR107C
YHR135C
YHR140W
YHR157W
YHR160C
YHR162W
YHR163W
YHR167W
YHR171W
YHR175W-A
YHR179W
YHR192W
YIL007C
YIL016W
YIL024C
YIL044C
YIL053W
YIL055C
YIL072W
YIL074C
YIL106W
YIL108W
YIL124W
YIL133C
YIL138C
YIL144W
YIL157C
YIR013C
YIR017C
YIR038C
YJL003W
YJL023C
YJL024C
YJL033W
YJL046W
YJL055W
YJL056C
YJL060W
YJL063C
YJL073W
YJL090C
YJL094C
YJL096W
YJL100W
YJL104W
YJL106W
YJL115W
YJL145W
YJL147C
YJL157C
YJL183W
YJL184W
YJL193W
YJL194W
YJL196C
YJL209W
YJL210W
YJL218W
YJR004C
YJR005W
YJR022W
YJR054W
YJR057W
YJR082C
YJR098C
YJR115W
YJR116W
YJR120W
YJR124C
YJR134C
YJR141W
YJR142W
YJR153W
YJR154W
YKL013C
YKL021C
YKL024C
YKL025C
YKL033W
YKL033W-A
YKL046C
YKL049C
YKL061W
YKL063C
YKL077W
YKL084W
YKL088W
YKL095W
YKL104C
YKL108W
YKL109W
YKL110C
YKL120W
YKL126W
YKL140W
YKL145W
YKL159C
YKL167C
YKL192C
YKL204W
YKR013W
YKR018C
YKR030W
YKR031C
YKR060W
YKR062W
YKR067W
YKR085C
YKR089C
YKR098C
YLL009C
YLL046C
YLL060C
YLR010C
YLR018C
YLR022C
YLR028C
YLR038C
YLR039C
YLR056W
YLR057W
YLR080W
YLR100W
YLR114C
YLR119W
YLR163C
YLR164W
YLR179C
YLR190W
YLR214W
YLR224W
YLR238W
YLR246W
YLR251W
YLR254C
YLR260W
YLR289W
YLR292C
YLR299W
YLR312C
YLR321C
YLR325C
YLR327C
YLR329W
YLR341W
YLR343W
YLR356W
YLR363W-A
YLR364W
YLR404W
YLR405W
YLR412C-A
YLR420W
YLR426W
YLR438C-A
YLR438W
YLR443W
YLR447C
YLR452C
YLR453C
YLR461W
YML019W
YML021C
YML029W
YML035C
YML043C
YML054C-A
YML071C
YML082W
YML107C
YML111W
YML115C
YML116W
YMR020W
YMR026C
YMR034C
YMR070W
YMR078C
YMR092C
YMR094W
YMR110C
YMR114C
YMR120C
YMR121C
YMR139W
YMR147W
YMR161W
YMR166C
YMR178W
YMR183C
YMR186W
YMR194C-B
YMR211W
YMR220W
YMR224C
YMR226C
YMR244C-A
YMR244W
YMR247W-A
YMR250W
YMR264W
YMR285C
YMR291W
YMR294W
YMR312W
YMR313C
YMR314W
YMR315W
YMR322C
YNL005C
YNL024C
YNL029C
YNL042W-B
YNL044W
YNL058C
YNL079C
YNL123W
YNL127W
YNL131W
YNL137C
YNL153C
YNL163C
YNL177C
YNL178W
YNL185C
YNL191W
YNL196C
YNL215W
YNL217W
YNL218W
YNL236W
YNL239W
YNL240C
YNL261W
YNL272C
YNL281W
YNL290W
YNL308C
YNL309W
YNL312W
YNL313C
YNL321W
YNL333W
YNL336W
YNR007C
YNR015W
YNR029C
YNR036C
YNR060W
YNR064C
YOL009C
YOL031C
YOL053W
YOL056W
YOL068C
YOL073C
YOL077W-A
YOL080C
YOL082W
YOL097W-A
YOL107W
YOL112W
YOL129W
YOR004W
YOR010C
YOR025W
YOR031W
YOR033C
YOR034C-A
YOR061W
YOR062C
YOR074C
YOR080W
YOR094W
YOR106W
YOR145C
YOR149C
YOR157C
YOR159C
YOR161C
YOR177C
YOR211C
YOR238W
YOR242C
YOR272W
YOR293C-A
YOR297C
YOR304C-A
YOR305W
YOR315W
YOR316C-A
YOR324C
YOR339C
YOR350C
YOR370C
YOR377W
YOR381W
YOR384W
YPL011C
YPL013C
YPL029W
YPL045W
YPL052W
YPL074W
YPL086C
YPL089C
YPL098C
YPL099C
YPL100W
YPL107W
YPL108W
YPL109C
YPL134C
YPL148C
YPL165C
YPL193W
YPL196W
YPL208W
YPL219W
YPL222W
YPL236C
YPL244C
YPL246C
YPL267W
YPL273W
YPR005C
YPR015C
YPR035W
YPR051W
YPR067W
YPR078C
YPR101W
YPR105C
YPR108W
YPR118W
YPR138C
YPR139C
YPR155C
YPR159C-A
YPR166C
YPR168W
YPR175W
YPR182W
YPR190C
YAL007C
YAL032C
YAL034C
YAL037C-A
YAL049C
YAL054C
YAL059W
YAL060W
YAR023C
YBL006C
YBL008W
YBL015W
YBL016W
YBL018C
YBL021C
YBL029W
YBL031W
YBL036C
YBL040C
YBL067C
YBL086C
YBR024W
YBR029C
YBR037C
YBR039W
YBR050C
YBR061C
YBR074W
YBR082C
YBR088C
YBR110W
YBR137W
YBR146W
YBR166C
YBR170C
YBR173C
YBR196C-B
YBR200W
YBR207W
YBR211C
YBR215W
YBR220C
YBR225W
YBR239C
YBR253W
YBR257W
YBR267W
YBR284W
YBR296C-A
YCL030C
YCR003W
YCR024C
YCR035C
YCR045C
YCR047C
YCR048W
YCR063W
YCR069W
YCR075W-A
YCR083W
YCR091W
YCR105W
YDL006W
YDL024C
YDL025C
YDL028C
YDL037C
YDL066W
YDL085C-A
YDL093W
YDL116W
YDL120W
YDL121C
YDL148C
YDL159W
YDL165W
YDL167C
YDL174C
YDL181W
YDL197C
YDL203C
YDL218W
YDL219W
YDL227C
YDL230W
YDL234C
YDR004W
YDR036C
YDR041W
YDR049W
YDR055W
YDR056C
YDR059C
YDR073W
YDR092W
YDR109C
YDR116C
YDR120C
YDR137W
YDR142C
YDR151C
YDR156W
YDR164C
YDR174W
YDR181C
YDR201W
YDR223W
YDR242W
YDR256C
YDR261C
YDR262W
YDR266C
YDR268W
YDR277C
YDR294C
YDR295C
YDR301W
YDR304C
YDR307W
YDR352W
YDR353W
YDR363W-A
YDR364C
YDR368W
YDR375C
YDR379C-A
YDR393W
YDR397C
YDR399W
YDR402C
YDR410C
YDR419W
YDR422C
YDR434W
YDR470C
YDR478W
YDR481C
YDR488C
YDR496C
YDR506C
YDR515W
YDR516C
YDR517W
YDR527W
YEL006W
YEL072W
YER012W
YER014C-A
YER035W
YER046W
YER053C
YER053C-A
YER054C
YER063W
YER070W
YER071C
YER079W
YER083C
YER085C
YER087W
YER089C
YER098W
YER115C
YER122C
YER127W
YER140W
YER141W
YER159C
YER161C
YER180C
YER180C-A
YER186C
YFL005W
YFL013C
YFL016C
YFL018C
YFL027C
YFL029C
YFL047W
YFR003C
YFR015C
YFR027W
YFR046C
YGL017W
YGL018C
YGL021W
YGL048C
YGL053W
YGL054C
YGL059W
YGL063W
YGL070C
YGL075C
YGL082W
YGL083W
YGL099W
YGL101W
YGL112C
YGL134W
YGL143C
YGL145W
YGL159W
YGL175C
YGL176C
YGL209W
YGL228W
YGL235W
YGL242C
YGL250W
YGL257C
YGL259W
YGR004W
YGR005C
YGR009C
YGR010W
YGR013W
YGR015C
YGR026W
YGR034W
YGR041W
YGR048W
YGR049W
YGR053C
YGR056W
YGR076C
YGR078C
YGR089W
YGR121W-A
YGR130C
YGR131W
YGR149W
YGR166W
YGR167W
YGR174W-A
YGR177C
YGR181W
YGR195W
YGR199W
YGR205W
YGR208W
YGR209C
YGR224W
YGR249W
YGR253C
YGR254W
YGR257C
YGR282C
YGR284C
YGR286C
YHL040C
YHL047C
YHR001W-A
YHR008C
YHR011W
YHR017W
YHR018C
YHR025W
YHR034C
YHR037W
YHR045W
YHR049W
YHR061C
YHR064C
YHR072W-A
YHR110W
YHR112C
YHR114W
YHR127W
YHR143W-A
YHR149C
YHR155W
YHR181W
YHR187W
YHR190W
YHR191C
YHR197W
YHR199C
YHR209W
YIL003W
YIL004C
YIL006W
YIL010W
YIL022W
YIL029C
YIL077C
YIL078W
YIL079C
YIL087C
YIL099W
YIL113W
YIL116W
YIL120W
YIL132C
YIL134W
YIL154C
YIL155C
YIL161W
YIL164C
YIR001C
YIR004W
YIR012W
YIR015W
YIR026C
YIR027C
YIR033W
YJL004C
YJL011C
YJL036W
YJL037W
YJL047C
YJL049W
YJL077C
YJL078C
YJL088W
YJL117W
YJL118W
YJL137C
YJL139C
YJL141C
YJL151C
YJL155C
YJL167W
YJL200C
YJL217W
YJR013W
YJR024C
YJR032W
YJR034W
YJR039W
YJR049C
YJR056C
YJR060W
YJR062C
YJR067C
YJR072C
YJR078W
YJR095W
YJR100C
YJR101W
YJR104C
YKL051W
YKL074C
YKL075C
YKL080W
YKL086W
YKL087C
YKL094W
YKL096W-A
YKL103C
YKL107W
YKL116C
YKL130C
YKL137W
YKL139W
YKL155C
YKL161C
YKL170W
YKL191W
YKL221W
YKR004C
YKR005C
YKR007W
YKR016W
YKR026C
YKR029C
YKR037C
YKR045C
YKR046C
YKR058W
YKR070W
YKR076W
YKR104W
YLL001W
YLL014W
YLL025W
YLL033W
YLL035W
YLL043W
YLL052C
YLL053C
YLR013W
YLR016C
YLR025W
YLR034C
YLR049C
YLR063W
YLR065C
YLR066W
YLR070C
YLR085C
YLR088W
YLR093C
YLR103C
YLR115W
YLR120C
YLR128W
YLR137W
YLR138W
YLR141W
YLR147C
YLR152C
YLR165C
YLR168C
YLR172C
YLR173W
YLR199C
YLR201C
YLR203C
YLR207W
YLR218C
YLR234W
YLR263W
YLR264C-A
YLR267W
YLR270W
YLR283W
YLR287C
YLR288C
YLR298C
YLR346C
YLR360W
YLR361C
YLR361C-A
YLR372W
YLR389C
YLR408C
YLR427W
YLR442C
YML038C
YML054C
YML058W-A
YML079W
YML081C-A
YML094W
YML102W
YML117W
YML120C
YMR016C
YMR060C
YMR067C
YMR085W
YMR104C
YMR112C
YMR130W
YMR133W
YMR144W
YMR146C
YMR156C
YMR160W
YMR180C
YMR181C
YMR182C
YMR184W
YMR187C
YMR188C
YMR201C
YMR213W
YMR230W-A
YMR232W
YMR233W
YMR234W
YMR237W
YMR274C
YMR279C
YMR283C
YMR289W
YMR296C
YMR297W
YMR301C
YMR303C
YMR310C
YNL007C
YNL010W
YNL020C
YNL026W
YNL039W
YNL040W
YNL047C
YNL056W
YNL061W
YNL077W
YNL080C
YNL097C
YNL100W
YNL130C
YNL146C-A
YNL149C
YNL151C
YNL152W
YNL155W
YNL157W
YNL161W
YNL162W-A
YNL173C
YNL176C
YNL181W
YNL188W
YNL194C
YNL199C
YNL202W
YNL214W
YNL244C
YNL252C
YNL254C
YNL260C
YNL265C
YNL274C
YNL277W
YNL277W-A
YNL292W
YNL335W
YNR003C
YNR014W
YNR020C
YNR030W
YNR031C
YNR032C-A
YNR033W
YNR039C
YNR040W
YNR043W
YNR061C
YNR063W
YOL002C
YOL011W
YOL019W-A
YOL025W
YOL057W
YOL072W
YOL086W-A
YOL101C
YOL104C
YOL110W
YOL122C
YOL131W
YOL138C
YOL147C
YOL151W
YOR022C
YOR026W
YOR040W
YOR051C
YOR060C
YOR065W
YOR078W
YOR101W
YOR110W
YOR111W
YOR116C
YOR138C
YOR151C
YOR155C
YOR156C
YOR180C
YOR184W
YOR202W
YOR210W
YOR221C
YOR226C
YOR236W
YOR250C
YOR253W
YOR258W
YOR259C
YOR260W
YOR261C
YOR262W
YOR264W
YOR269W
YOR280C
YOR281C
YOR308C
YOR335C
YOR344C
YOR356W
YOR367W
YOR376W-A
YPL041C
YPL042C
YPL053C
YPL088W
YPL092W
YPL096W
YPL103C
YPL119C-A
YPL132W
YPL151C
YPL152W-A
YPL164C
YPL166W
YPL171C
YPL183C
YPL188W
YPL189C-A
YPL194W
YPL213W
YPL224C
YPL235W
YPL243W
YPL277C
YPR003C
YPR017C
YPR037C
YPR056W
YPR058W
YPR094W
YPR124W
YPR135W
YPR137W
YPR152C
YPR154W
YPR171W
YPR176C
YPR187W
YPR201W
YAL010C
YAL011W
YAL013W
YAL030W
YAL048C
YAR003W
YAR020C
YAR028W
YAR031W
YAR035W
YBL003C
YBL013W
YBL025W
YBL037W
YBL045C
YBL059W
YBL076C
YBL091C
YBL102W
YBL105C
YBL106C
YBL107C
YBR001C
YBR013C
YBR031W
YBR044C
YBR047W
YBR053C
YBR065C
YBR072W
YBR087W
YBR091C
YBR098W
YBR102C
YBR104W
YBR105C
YBR106W
YBR111C
YBR138C
YBR149W
YBR151W
YBR152W
YBR156C
YBR165W
YBR167C
YBR171W
YBR180W
YBR204C
YBR212W
YBR214W
YBR251W
YBR264C
YBR278W
YBR281C
YCL001W-B
YCL008C
[truncated: 2,065 more rows]

## Sheet: HyperG Strain-Spec. Bkgd List
UID
YAL043C
YAL044C
YBL035C
YBL089W
YBR059C
YBR093C
YBR103W
YBR140C
YBR154C
YBR158W
YBR169C
YBR194W
YBR293W
YBR298C
YCL036W
YCL069W
YCR100C
YDL027C
YDL092W
YDL180W
YDR139C
YDR252W
YDR312W
YDR315C-1
YDR394W
YDR428C
YDR451C
YDR453C
YDR472W
YER038C
YER041W
YER044C
YER048C
YER092W
YER113C
YER169W
YFL040W
YGL013C
YGL164C
YGL197W
YGL213C
YGL233W
YGR128C
YGR142W
YGR173W
YGR248W
YGR250C
YGR278W
YHL002W
YHR013C
YHR156C
YHR188C
YIL002C
YIL068C
YIL071C
YIL096C
YIL117C
YIL146C
YIL158W
YIR003W
YJL053W
YJL071W
YJL082W
YJL108C
YJL206C
YJR002W
YJR011C
YJR059W
YKL005C
YKL113C
YKL172W
YKL197C
YKR039W
YKR055W
YKR105C
YLL054C
YLL061W
YLR004C
YLR015W
YLR019W
YLR045C
YLR059C
YLR068W
YLR097C
YLR102C
YLR177W
YLR186W
YLR231C
YLR265C
YLR436C
YML013W
YML077W
YML083C
YML119W
YML127W
YMR135C
YMR268C
YMR311C
YNL072W
YNL096C
YNL117W
YNL187W
YNL251C
YNL259C
YNL310C
YNL329C
YNR019W
YNR047W
YNR050C
YOL030W
YOL038C-A
YOL139C
YOL144W
YOR016C
YOR059C
YOR099W
YOR127W
YOR172W
YOR186W
YOR212W
YOR216C
YOR271C
YOR310C
YPL018W
YPL139C
YPL163C
YPL252C
YPR046W
YPR127W
YPR144C
YAR002C-A
YAR015W
YBL010C
YBL011W
YBL033C
YBL055C
YBL056W
YBL068W
YBL080C
YBR036C
YBR041W
YBR062C
YBR182C-A
YBR244W
YBR258C
YBR271W
YBR276C
YCL004W
YCL011C
YCL064C
YCR007C
YCR028C-A
YCR043C
YCR068W
YCR071C
YCR084C
YCR090C
YCR106W
YDL040C
YDL069C
YDL075W
YDL083C
YDL087C
YDL097C
YDL101C
YDL135C
YDL142C
YDL182W
YDL213C
YDR003W-A
YDR110W
YDR124W
YDR165W
YDR179W-A
YDR194W-A
YDR225W
YDR228C
YDR311W
YDR339C
YDR350C
YDR359C
YDR367W
YDR379W
YDR429C
YDR462W
YDR465C
YEL001C
YEL029C
YEL049W
YEL057C
YER022W
YER066W
YER076C
YER082C
YER185W
YFL041W-A
YFL042C
YFR005C
YFR018C
YFR022W
YFR039C
YFR047C
YGL019W
YGL029W
YGL056C
YGL087C
YGL119W
YGL254W
YGR077C
YGR109C
YGR122W
YGR147C
YGR163W
YGR168C
YGR180C
YGR204W
YGR225W
YGR226C
YGR231C
YGR244C
YGR263C
YGR268C
YHL012W
YHL019C
YHL044W
YHR014W
YHR036W
YHR044C
YHR108W
YHR111W
YHR122W
YHR133C
YHR151C
YHR177W
YHR202W
YIR005W
YJL027C
YJL121C
YJL125C
YJL174W
YJR003C
YJR009C
YJR051W
YJR055W
YJR096W
YJR119C
YJR152W
YKL007W
YKL008C
YKL027W
YKL037W
YKL043W
YKL096W
YKL132C
YKL146W
YKL154W
YKL183W
YKL222C
YKR001C
YKR008W
YKR043C
YKR044W
YKR065C
YLL004W
YLL007C
YLL055W
YLR011W
YLR051C
YLR077W
YLR098C
YLR104W
YLR107W
YLR151C
YLR211C
YLR216C
YLR239C
YLR253W
YLR266C
YLR284C
YLR295C
YLR313C
YLR324W
YLR345W
YLR375W
YLR380W
YLR395C
YLR431C
YLR449W
YML018C
YML125C
YMR021C
YMR031C
YMR076C
YMR117C
YMR119W
YMR159C
YMR267W
YMR302C
YNL046W
YNL108C
YNL146W
YNL182C
YNL206C
YNL258C
YNL262W
YNL270C
YNL275W
YNL293W
YNL314W
YNL326C
YNR026C
YNR048W
YNR058W
YNR059W
YOL038W
YOL044W
YOL116W
YOL125W
YOL140W
YOR070C
YOR075W
YOR104W
YOR130C
YOR142W
YOR147W
YOR163W
YOR174W
YOR179C
YOR196C
YOR213C
YOR232W
YOR306C
YOR349W
YOR354C
YOR358W
YPL097W
YPL172C
YPL201C
YPL229W
YPL253C
YPR004C
YPR023C
YPR057W
YPR133W-A
YPR158W
YPR180W
YPR188C
YPR200C
YAL016W
YAL064C-A
YAL067C
YBL008W-A
YBL057C
YBL091C-A
YBR003W
YBR018C
YBR020W
YBR026C
YBR045C
YBR058C-A
YBR076W
YBR107C
YBR125C
YBR148W
YBR186W
YBR205W
YBR217W
YBR236C
YBR250W
YBR261C
YBR291C
YBR299W
YCL001W-A
YCL016C
YCL051W
YCR008W
YCR010C
YCR019W
YCR027C
YCR059C
YCR061W
YCR076C
YDL017W
YDL059C
YDL064W
YDL085W
YDL102W
YDL106C
YDL107W
YDL114W
YDL123W
YDL138W
YDL144C
YDL155W
YDL168W
YDL176W
YDL199C
YDR007W
YDR143C
YDR175C
YDR179C
YDR183W
YDR197W
YDR218C
YDR222W
YDR231C
YDR235W
YDR236C
YDR244W
YDR255C
YDR257C
YDR315C
YDR323C
YDR357C
YDR373W
YDR427W
YDR454C
YDR487C
YDR490C
YDR498C
YDR508C
YEL002C
YEL004W
YEL016C
YEL019C
YEL026W
YEL032W
YEL051W
YEL052W
YEL062W
YER006W
YER007W
YER034W
YER039C-A
YER042W
YER049W
YER050C
YER055C
YER059W
YER060W
YER078C
YER096W
YER143W
YER148W
YFL060C
YFR006W
YFR017C
YFR025C
YFR037C
YFR044C
YFR055W
YGL041C-B
YGL043W
YGL057C
YGL065C
YGL081W
YGL091C
YGL117W
YGL142C
YGL145W-1
YGL154C
YGL171W
YGL179C
YGL202W
YGL205W
YGL226C-A
YGL237C
YGL243W
YGL246C
YGL261C
YGR020C
YGR021W
YGR027C
YGR037C
YGR066C
YGR071C
YGR072W
YGR104C
YGR132C
YGR143W
YGR158C
YGR161W-C
YGR165W
YGR172C
YGR185C
YGR187C
YGR210C
YGR236C
YGR252W
YHL001W
YHL011C
YHL013C
YHR022C
YHR039C
YHR051W
YHR088W
YHR090C
YHR092C
YHR118C
YHR136C
YHR148W
YHR176W
YHR182W
YHR210C
YIL040W
YIL046W
YIL067C
YIL083C
YIL089W
YIL097W
YIL098C
YIL121W
YIL127C
YIL145C
YIL152W
YIL160C
YIR010W
YIR021W
YJL059W
YJL065C
YJL066C
YJL072C
YJL091C
YJL099W
YJL103C
YJL127C
YJL143W
YJL153C
YJL156C
YJL160C
YJL166W
YJL186W
YJR025C
YJR036C
YJR048W
YJR058C
YJR069C
YJR080C
YJR112W-A
YJR133W
YKL016C
YKL023W
YKL040C
YKL047W
YKL085W
YKL089W
YKL143W
YKL162C
YKL190W
YKL201C
YKR002W
YKR015C
YKR024C
YKR041W
YKR072C
YKR078W
YKR080W
YKR087C
YLL006W-A
YLL023C
YLL028W
YLL051C
YLL056C
YLR001C
YLR009W
YLR020C
YLR023C
YLR043C
YLR082C
YLR099W-A
YLR113W
YLR117C
YLR118C
YLR126C
YLR146C
YLR180W
YLR192C
YLR200W
YLR204W
YLR208W
YLR226W
YLR262C-A
YLR268W
YLR274W
YLR286C
YLR328W
YLR352W
YLR369W
YLR457C
YLR459W
YML014W
YML027W
YML031W
YML036W
YML050W
YML066C
YML069W
YML076C
YML101C
YML105C
YMR001C-A
YMR013W-A
YMR018W
YMR029C
YMR097C
YMR100W
YMR137C
YMR155W
YMR158W
YMR171C
YMR173W
YMR193W
YMR208W
YMR215W
YMR228W
YMR240C
YMR251W
YMR253C
YMR258C
YMR261C
YMR265C
YMR278W
YMR284W
YMR286W
YMR305C
YMR315W-A
YMR318C
YNL002C
YNL003C
YNL015W
YNL041C
YNL062C
YNL084C
YNL090W
YNL107W
YNL128W
YNL133C
YNL138W
YNL156C
YNL204C
YNL213C
YNL249C
YNL263C
YNL269W
YNL280C
YNL284C
YNL288W
YNL291C
YNL307C
YNL315C
YNL316C
YNL332W
YNL334C
YNR038W
YNR062C
YNR066C
YNR068C
YNR074C
YNR075W
YOL003C
YOL010W
YOL032W
YOL033W
YOL043C
YOL048C
YOL088C
YOL091W
YOL093W
YOL095C
YOL096C
YOL132W
YOL133W
YOL137W
YOL143C
YOL159C-A
YOL164W
YOR006C
YOR057W
YOR100C
YOR103C
YOR115C
YOR137C
YOR150W
YOR193W
YOR197W
YOR201C
YOR215C
YOR220W
YOR224C
YOR229W
YOR279C
YOR286W
YOR298W
YOR316C
YOR323C
YOR357C
YOR365C
YOR378W
YPL003W
YPL101W
YPL122C
YPL138C
YPL168W
YPL178W
YPL181W
YPL199C
YPL233W
YPL245W
YPL255W
YPL259C
YPR009W
YPR011C
YPR025C
YPR032W
YPR041W
YPR068C
YPR075C
YPR085C
YPR107C
YPR111W
YPR141C
YPR167C
YPR196W
YAL009W
YAL012W
YAL015C
YAL018C
YAL020C
YAL022C
YAL027W
YAL028W
YAL033W
YAL053W
YAL062W
YAR027W
YBL002W
YBL019W
YBL050W
YBL064C
YBL069W
YBL081W
YBL090W
YBR002C
YBR005W
YBR007C
YBR011C
YBR022W
YBR028C
YBR043C
YBR060C
YBR063C
YBR067C
YBR070C
YBR077C
YBR085C-A
YBR095C
YBR096W
YBR120C
YBR130C
YBR132C
YBR133C
YBR141C
YBR147W
YBR155W
YBR182C
YBR185C
YBR193C
YBR198C
YBR199W
YBR216C
YBR228W
YBR234C
YBR246W
YBR249C
YBR254C
YBR273C
YBR301W
YCL001W
YCL010C
YCL017C
YCL026C-B
YCL052C
YCR015C
YCR016W
YCR036W
YCR046C
YCR060W
YCR079W
YCR094W
YCR095W-A
YDL007W
YDL012C
YDL044C
YDL046W
YDL055C
YDL056W
YDL088C
YDL089W
YDL100C
YDL110C
YDL113C
YDL115C
YDL125C
YDL146W
YDL149W
YDL150W
YDL159W-A
YDL160C-A
YDL166C
YDL169C
YDL170W
YDL175C
YDL179W
YDL200C
YDL209C
YDL211C
YDL217C
YDL243C
YDR003W
YDR032C
YDR044W
YDR045C
YDR087C
YDR100W
YDR101C
YDR108W
YDR118W
YDR138W
YDR148C
YDR152W
YDR153C
YDR158W
YDR162C
YDR163W
YDR169C-A
YDR171W
YDR177W
YDR178W
YDR191W
YDR202C
YDR229W
YDR237W
YDR243C
YDR245W
YDR246W-A
YDR259C
YDR265W
YDR292C
YDR296W
YDR297W
YDR316W
YDR317W
YDR321W
YDR330W
YDR332W
YDR347W
YDR362C
YDR372C
YDR381W
YDR386W
YDR408C
YDR425W
YDR459C
YDR460W
YDR461W
YDR473C
YDR480W
YDR489W
YDR501W
YDR510W
YDR514C
YDR522C
YDR529C
YDR532C
YDR534C
YDR536W
YDR541C
YEL011W
YEL037C
YEL039C
YEL050C
YEL056W
YEL058W
YEL063C
YER016W
YER023W
YER037W
YER044C-A
YER051W
YER061C
YER067W
YER073W
YER077C
YER080W
YER086W
YER101C
YER124C
YER137C
YER146W
YER174C
YER177W
YFL002C
YFL012W
YFL017C
YFL026W
YFL028C
YFL030W
YFL044C
YFL052W
YFR002W
YFR024C-A
YFR045W
YFR049W
YFR050C
YFR051C
YGL004C
YGL026C
YGL028C
YGL037C
YGL058W
YGL064C
YGL067W
YGL080W
YGL095C
YGL098W
YGL121C
YGL158W
YGL194C
YGL196W
YGL212W
YGL227W
YGL231C
YGL245W
YGR002C
YGR007W
YGR016W
YGR038W
YGR042W
YGR043C
YGR045C
YGR063C
YGR088W
YGR096W
YGR099W
YGR101W
YGR105W
YGR106C
YGR127W
YGR129W
YGR146C-A
YGR153W
YGR154C
YGR155W
YGR174C
YGR197C
YGR204C-A
YGR206W
YGR207C
YGR211W
YGR215W
YGR220C
YGR227W
YGR232W
YGR233C
YGR237C
YGR262C
YGR264C
YGR267C
YGR288W
YHL008C
YHL039W
YHL042W
YHR005C
YHR021C
YHR032W
YHR033W
YHR046C
YHR047C
YHR048W
YHR059W
YHR071W
YHR075C
YHR076W
YHR086W-A
YHR107C
YHR135C
YHR140W
YHR157W
YHR160C
YHR162W
YHR163W
YHR167W
YHR171W
YHR175W-A
YHR179W
YHR192W
YIL007C
YIL016W
YIL024C
YIL044C
YIL053W
YIL055C
YIL072W
YIL074C
YIL106W
YIL108W
YIL124W
YIL133C
YIL138C
YIL144W
YIL157C
YIR013C
YIR017C
YIR038C
YJL003W
YJL023C
YJL024C
YJL033W
YJL046W
YJL055W
YJL056C
YJL060W
YJL063C
YJL073W
YJL090C
YJL094C
YJL096W
YJL100W
YJL104W
YJL106W
YJL115W
YJL145W
YJL147C
YJL157C
YJL183W
YJL184W
YJL193W
YJL194W
YJL196C
YJL209W
YJL210W
YJL218W
YJR004C
YJR005W
YJR022W
YJR054W
YJR057W
YJR082C
YJR098C
YJR115W
YJR116W
YJR120W
YJR124C
YJR134C
YJR141W
YJR142W
YJR153W
YJR154W
YKL013C
YKL021C
YKL024C
YKL025C
YKL033W
YKL033W-A
YKL046C
YKL049C
YKL061W
YKL063C
YKL077W
YKL084W
YKL088W
YKL095W
YKL104C
YKL108W
YKL109W
YKL110C
YKL120W
YKL126W
YKL140W
YKL145W
YKL159C
YKL167C
YKL192C
YKL204W
YKR013W
YKR018C
YKR030W
YKR031C
YKR060W
YKR062W
YKR067W
YKR085C
YKR089C
YKR098C
YLL009C
YLL046C
YLL060C
YLR010C
YLR018C
YLR022C
YLR028C
YLR038C
YLR039C
YLR056W
YLR057W
YLR080W
YLR100W
YLR114C
YLR119W
YLR163C
YLR164W
YLR179C
YLR190W
YLR214W
YLR224W
YLR238W
YLR246W
YLR251W
YLR254C
YLR260W
YLR289W
YLR292C
YLR299W
YLR312C
YLR321C
YLR325C
YLR327C
YLR329W
YLR341W
YLR343W
YLR356W
YLR363W-A
YLR364W
YLR404W
YLR405W
YLR412C-A
YLR420W
YLR426W
YLR438C-A
YLR438W
YLR443W
YLR447C
YLR452C
YLR453C
YLR461W
YML019W
YML021C
YML029W
YML035C
YML043C
YML054C-A
YML071C
YML082W
YML107C
YML111W
YML115C
YML116W
YMR020W
YMR026C
YMR034C
YMR070W
YMR078C
YMR092C
YMR094W
YMR110C
YMR114C
YMR120C
YMR121C
YMR139W
YMR147W
YMR161W
YMR166C
YMR178W
YMR183C
YMR186W
YMR194C-B
YMR211W
YMR220W
YMR224C
YMR226C
YMR244C-A
YMR244W
YMR247W-A
YMR250W
YMR264W
YMR285C
YMR291W
YMR294W
YMR312W
YMR313C
YMR314W
YMR315W
YMR322C
YNL005C
YNL024C
YNL029C
YNL042W-B
YNL044W
YNL058C
YNL079C
YNL123W
YNL127W
YNL131W
YNL137C
YNL153C
YNL163C
YNL177C
YNL178W
YNL185C
YNL191W
YNL196C
YNL215W
YNL217W
YNL218W
YNL236W
YNL239W
YNL240C
YNL261W
YNL272C
YNL281W
YNL290W
YNL308C
YNL309W
YNL312W
YNL313C
YNL321W
YNL333W
YNL336W
YNR007C
YNR015W
YNR029C
YNR036C
YNR060W
YNR064C
YOL009C
YOL031C
YOL053W
YOL056W
YOL068C
YOL073C
YOL077W-A
YOL080C
YOL082W
YOL097W-A
YOL107W
YOL112W
YOL129W
YOR004W
YOR010C
YOR025W
YOR031W
YOR033C
YOR034C-A
YOR061W
YOR062C
YOR074C
YOR080W
YOR094W
YOR106W
YOR145C
YOR149C
YOR157C
YOR159C
YOR161C
YOR177C
YOR211C
YOR238W
YOR242C
YOR272W
YOR293C-A
YOR297C
YOR304C-A
YOR305W
YOR315W
YOR316C-A
YOR324C
YOR339C
YOR350C
YOR370C
YOR377W
YOR381W
YOR384W
YPL011C
YPL013C
YPL029W
YPL045W
YPL052W
YPL074W
YPL086C
YPL089C
YPL098C
YPL099C
YPL100W
YPL107W
YPL108W
YPL109C
YPL134C
YPL148C
YPL165C
YPL193W
YPL196W
YPL208W
YPL219W
YPL222W
YPL236C
YPL244C
YPL246C
YPL267W
YPL273W
YPR005C
YPR015C
YPR035W
YPR051W
YPR067W
YPR078C
YPR101W
YPR105C
YPR108W
YPR118W
YPR138C
YPR139C
YPR155C
YPR159C-A
YPR166C
YPR168W
YPR175W
YPR182W
YPR190C
YAL007C
YAL032C
YAL034C
YAL037C-A
YAL049C
YAL054C
YAL059W
YAL060W
YAR023C
YBL006C
YBL008W
YBL015W
YBL016W
YBL018C
YBL021C
YBL029W
YBL031W
YBL036C
YBL040C
YBL067C
YBL086C
YBR024W
YBR029C
YBR037C
YBR039W
YBR050C
YBR061C
YBR074W
YBR082C
YBR088C
YBR110W
YBR137W
YBR146W
YBR166C
YBR170C
YBR173C
YBR196C-B
YBR200W
YBR207W
YBR211C
YBR215W
YBR220C
YBR225W
YBR239C
YBR253W
YBR257W
YBR267W
YBR284W
YBR296C-A
YCL030C
YCR003W
YCR024C
YCR035C
YCR045C
YCR047C
YCR048W
YCR063W
YCR069W
YCR075W-A
YCR083W
YCR091W
YCR105W
YDL006W
YDL024C
YDL025C
YDL028C
YDL037C
YDL066W
YDL085C-A
YDL093W
YDL116W
YDL120W
YDL121C
YDL148C
YDL159W
YDL165W
YDL167C
YDL174C
YDL181W
YDL197C
YDL203C
YDL218W
YDL219W
YDL227C
YDL230W
YDL234C
YDR004W
YDR036C
YDR041W
YDR049W
YDR055W
YDR056C
YDR059C
YDR073W
YDR092W
YDR109C
YDR116C
YDR120C
YDR137W
YDR142C
YDR151C
YDR156W
YDR164C
YDR174W
YDR181C
YDR201W
YDR223W
YDR242W
YDR256C
YDR261C
YDR262W
YDR266C
YDR268W
YDR277C
YDR294C
YDR295C
YDR301W
YDR304C
YDR307W
YDR352W
YDR353W
YDR363W-A
YDR364C
YDR368W
YDR375C
YDR379C-A
YDR393W
YDR397C
YDR399W
YDR402C
YDR410C
YDR419W
YDR422C
YDR434W
YDR470C
YDR478W
YDR481C
YDR488C
YDR496C
YDR506C
YDR515W
YDR516C
YDR517W
YDR527W
YEL006W
YEL072W
YER012W
YER014C-A
YER035W
YER046W
YER053C
YER053C-A
YER054C
YER063W
YER070W
YER071C
YER079W
YER083C
YER085C
YER087W
YER089C
YER098W
YER115C
YER122C
YER127W
YER140W
YER141W
YER159C
YER161C
YER180C
YER180C-A
YER186C
YFL005W
YFL013C
YFL016C
YFL018C
YFL027C
YFL029C
YFL047W
YFR003C
YFR015C
YFR027W
YFR046C
YGL017W
YGL018C
YGL021W
YGL048C
YGL053W
YGL054C
YGL059W
YGL063W
YGL070C
YGL075C
YGL082W
YGL083W
YGL099W
YGL101W
YGL112C
YGL134W
YGL143C
YGL145W
YGL159W
YGL175C
YGL176C
YGL209W
YGL228W
YGL235W
YGL242C
YGL250W
YGL257C
YGL259W
YGR004W
YGR005C
YGR009C
YGR010W
YGR013W
YGR015C
YGR026W
YGR034W
YGR041W
YGR048W
YGR049W
YGR053C
YGR056W
YGR076C
YGR078C
YGR089W
YGR121W-A
YGR130C
YGR131W
YGR149W
YGR166W
YGR167W
YGR174W-A
YGR177C
YGR181W
YGR195W
YGR199W
YGR205W
YGR208W
YGR209C
YGR224W
YGR249W
YGR253C
YGR254W
YGR257C
YGR282C
YGR284C
YGR286C
YHL040C
YHL047C
YHR001W-A
YHR008C
YHR011W
YHR017W
YHR018C
YHR025W
YHR034C
YHR037W
YHR045W
YHR049W
YHR061C
YHR064C
YHR072W-A
YHR110W
YHR112C
YHR114W
YHR127W
YHR143W-A
YHR149C
YHR155W
YHR181W
YHR187W
YHR190W
YHR191C
YHR197W
YHR199C
YHR209W
YIL003W
YIL004C
YIL006W
YIL010W
YIL022W
YIL029C
YIL077C
YIL078W
YIL079C
YIL087C
YIL099W
YIL113W
YIL116W
YIL120W
YIL132C
YIL134W
YIL154C
YIL155C
YIL161W
YIL164C
YIR001C
YIR004W
YIR012W
YIR015W
YIR026C
YIR027C
YIR033W
YJL004C
YJL011C
YJL036W
YJL037W
YJL047C
YJL049W
YJL077C
YJL078C
YJL088W
YJL117W
YJL118W
YJL137C
YJL139C
YJL141C
YJL151C
YJL155C
YJL167W
YJL200C
YJL217W
YJR013W
YJR024C
YJR032W
YJR034W
YJR039W
YJR049C
YJR056C
YJR060W
YJR062C
YJR067C
YJR072C
YJR078W
YJR095W
YJR100C
YJR101W
YJR104C
YKL051W
YKL074C
YKL075C
YKL080W
YKL086W
YKL087C
YKL094W
YKL096W-A
YKL103C
YKL107W
YKL116C
YKL130C
YKL137W
YKL139W
YKL155C
YKL161C
YKL170W
YKL191W
YKL221W
YKR004C
YKR005C
YKR007W
YKR016W
YKR026C
YKR029C
YKR037C
YKR045C
YKR046C
YKR058W
YKR070W
YKR076W
YKR104W
YLL001W
YLL014W
YLL025W
YLL033W
YLL035W
YLL043W
YLL052C
YLL053C
YLR013W
YLR016C
YLR025W
YLR034C
YLR049C
YLR063W
YLR065C
YLR066W
YLR070C
YLR085C
YLR088W
YLR093C
YLR103C
YLR115W
YLR120C
YLR128W
YLR137W
YLR138W
YLR141W
YLR147C
YLR152C
YLR165C
YLR168C
YLR172C
YLR173W
YLR199C
YLR201C
YLR203C
YLR207W
YLR218C
YLR234W
YLR263W
YLR264C-A
YLR267W
YLR270W
YLR283W
YLR287C
YLR288C
YLR298C
YLR346C
YLR360W
YLR361C
YLR361C-A
YLR372W
YLR389C
YLR408C
YLR427W
YLR442C
YML038C
YML054C
YML058W-A
YML079W
YML081C-A
YML094W
YML102W
YML117W
YML120C
YMR016C
YMR060C
YMR067C
YMR085W
YMR104C
YMR112C
YMR130W
YMR133W
YMR144W
YMR146C
YMR156C
YMR160W
YMR180C
YMR181C
YMR182C
YMR184W
YMR187C
YMR188C
YMR201C
YMR213W
YMR230W-A
YMR232W
YMR233W
YMR234W
YMR237W
YMR274C
YMR279C
YMR283C
YMR289W
YMR296C
YMR297W
YMR301C
YMR303C
YMR310C
YNL007C
YNL010W
YNL020C
YNL026W
YNL039W
YNL040W
YNL047C
YNL056W
YNL061W
YNL077W
YNL080C
YNL097C
YNL100W
YNL130C
YNL146C-A
YNL149C
YNL151C
YNL152W
YNL155W
YNL157W
YNL161W
YNL162W-A
YNL173C
YNL176C
YNL181W
YNL188W
YNL194C
YNL199C
YNL202W
YNL214W
YNL244C
YNL252C
YNL254C
YNL260C
YNL265C
YNL274C
YNL277W
YNL277W-A
YNL292W
YNL335W
YNR003C
YNR014W
YNR020C
YNR030W
YNR031C
YNR032C-A
YNR033W
YNR039C
YNR040W
YNR043W
YNR061C
YNR063W
YOL002C
YOL011W
YOL019W-A
YOL025W
YOL057W
YOL072W
YOL086W-A
YOL101C
YOL104C
YOL110W
YOL122C
YOL131W
YOL138C
YOL147C
YOL151W
YOR022C
YOR026W
YOR040W
YOR051C
YOR060C
YOR065W
YOR078W
YOR101W
YOR110W
YOR111W
YOR116C
YOR138C
YOR151C
YOR155C
YOR156C
YOR180C
YOR184W
YOR202W
YOR210W
YOR221C
YOR226C
YOR236W
YOR250C
YOR253W
YOR258W
YOR259C
YOR260W
YOR261C
YOR262W
YOR264W
YOR269W
YOR280C
YOR281C
YOR308C
YOR335C
YOR344C
YOR356W
YOR367W
YOR376W-A
YPL041C
YPL042C
YPL053C
YPL088W
YPL092W
YPL096W
YPL103C
YPL119C-A
YPL132W
YPL151C
YPL152W-A
YPL164C
YPL166W
YPL171C
YPL183C
YPL188W
YPL189C-A
YPL194W
YPL213W
YPL224C
YPL235W
YPL243W
YPL277C
YPR003C
YPR017C
YPR037C
YPR056W
YPR058W
YPR094W
YPR124W
YPR135W
YPR137W
YPR152C
YPR154W
YPR171W
YPR176C
YPR187W
YPR201W
YAL010C
YAL011W
YAL013W
YAL030W
YAL048C
YAR003W
YAR020C
YAR028W
YAR031W
YAR035W
YBL003C
YBL013W
YBL025W
YBL037W
YBL045C
YBL059W
YBL076C
YBL091C
YBL102W
YBL105C
YBL106C
YBL107C
YBR001C
YBR013C
YBR031W
YBR044C
YBR047W
YBR053C
YBR065C
YBR072W
YBR087W
YBR091C
YBR098W
YBR102C
YBR104W
YBR105C
YBR106W
YBR111C
YBR138C
YBR149W
YBR151W
YBR152W
YBR156C
YBR165W
YBR167C
YBR171W
YBR180W
YBR204C
YBR212W
YBR214W
YBR251W
YBR264C
YBR278W
YBR281C
YCL001W-B
YCL008C
[truncated: 1,634 more rows]
